# Supplementary material for: Transcriptomics Reveal Molecular Differences in Equine Oocytes Vitrified before and after In Vitro Maturation
Source: MDPI journal article supplement (doi:10.3390/ijms24086915), 2023-04-07
Supplement: s1 [file s1]

**Supplementary Table S1.** Survival, maturation, and efficiency rate in fresh and vitrified oocytes.

| Group        | Survival rate         | Maturation Rate                     | Efficiency                          |
|--------------|-----------------------|-------------------------------------|-------------------------------------|
| <i>Fresh</i> | 111/111 (100%)        | 111/190 (58.3 ± 3.1%) <sup>a*</sup> | 111/190 (58.3 ± 3.6%) <sup>a</sup>  |
| <i>VMAT</i>  | 112/135 (87.8 ± 2.9%) | 135/232 (58.3 ± 3.1%) <sup>a*</sup> | 112/232 (48.3 ± 3.3%) <sup>ab</sup> |
| <i>VIM</i>   | 204/210 (97.7 ± 1.1%) | 84/204 (40.5 ± 4.4%) <sup>b</sup>   | 84/210 (40.0 ± 3.4%) <sup>b</sup>   |

The survival rate is defined as the number of oocytes with an intact oolema after warming/ number of vitrified oocytes. The maturation rate is defined as the number of oocytes with an extruded polar body/ number of oocytes exposed to in vitro maturation. The efficiency was calculated as the number of oocytes stored for transcriptomics/initial number of oocytes. Groups with different superscripts differ significantly ( $p < 0.05$ ). \* The maturation rate in fresh and VMAT is equal, since oocytes for these groups were divided after in vitro maturation, and both underwent in vitro maturation together ( $n = 422$ ). Therefore, the initial number (fresh  $n = 190$  and VMAT  $n = 232$ ) was deducted from the maturation rate (58.3%) of the oocytes assigned to group 1: fresh non-vitrified oocytes as a control (FR);  $n = 111$ ) or group 2: oocytes vitrified after in vitro maturation (VMAT);  $n = 135$ ) after in vitro maturation.”. Results are presented as  $n$  (least square means ± standard error). VIM: oocytes vitrified before in vitro maturation.
