# Supplementary material for: Transcriptomics Reveal Molecular Differences in Equine Oocytes Vitrified before and after In Vitro Maturation
Source: Int J Mol Sci. 2023 Apr 7;24(8):6915. doi: 10.3390/ijms24086915 (PMC10138936; doi:10.3390/ijms24086915)
Supplement: Supplementary file 1 [file ijms-24-06915-s001.zip › Supplementary File S1. .xlsx]

## Sheet: VIM_VS_FRall
ensembl_gene_id	gene_name	description	baseMean	log2FoldChange	lfcSE	stat	pvalue	padj	is_differential
ENSECAG00000021949	RAD54B	RAD54 homolog B	215.473	-7.78722	1.17578	-6.62305	3.51857e-11	3.39659e-08	TRUE
ENSECAG00000000547	TM9SF4	transmembrane 9 superfamily member 4	224.388	-6.94046	0.973648	-7.1283	1.01615e-12	1.47139e-09	TRUE
ENSECAG00000022110	ASXL1	ASXL transcriptional regulator 1	114.855	-6.90236	1.59074	-4.33909	1.43077e-05	0.00230194	TRUE
ENSECAG00000008378	COMMD10	COMM domain containing 10	194.96	-6.86477	1.27488	-5.38464	7.25897e-08	3.00314e-05	TRUE
ENSECAG00000020627	NOA1	nitric oxide associated 1	171.88	-6.83869	1.39441	-4.90437	9.37288e-07	0.000246762	TRUE
ENSECAG00000024123	ANKRD31	ankyrin repeat domain 31	364.484	-6.7556	1.11911	-6.03657	1.57421e-09	1.13973e-06	TRUE
ENSECAG00000019791	RAB11FIP2	RAB11 family interacting protein 2	145.597	-6.73342	1.38405	-4.86503	1.14439e-06	0.000254934	TRUE
ENSECAG00000007963	ADAM10	ADAM metallopeptidase domain 10	364.288	-6.69607	1.18847	-5.63419	1.75881e-08	8.48919e-06	TRUE
ENSECAG00000014575	RB1	RB transcriptional corepressor 1	140.702	-6.56013	1.38871	-4.72389	2.31373e-06	0.000478611	TRUE
ENSECAG00000022389	PCBP2	poly(rC) binding protein 2	154.573	-6.17379	1.26589	-4.87704	1.07688e-06	0.000254934	TRUE
ENSECAG00000014964	MRPL39	mitochondrial ribosomal protein L39	200.208	-6.01506	1.01015	-5.95459	2.60723e-09	1.51011e-06	TRUE
ENSECAG00000022369	WBP2	WW domain binding protein 2	402.192	-6.00235	1.15239	-5.20862	1.90249e-07	6.12179e-05	TRUE
ENSECAG00000018272	LAP3	leucine aminopeptidase 3	181.622	-5.93632	1.30595	-4.54558	5.47839e-06	0.00105769	TRUE
ENSECAG00000022752	NUP214	nucleoporin 214	177.421	-5.75557	1.40501	-4.09646	4.19515e-05	0.00506214	TRUE
ENSECAG00000016645	MCOLN1	mucolipin TRP cation channel 1	159.013	-5.74183	1.38086	-4.15814	3.20843e-05	0.00442458	TRUE
ENSECAG00000024499	FOXO3	forkhead box O3	107.171	-5.64901	1.48542	-3.80298	0.000142967	0.013716	TRUE
ENSECAG00000023865	RAB11A	RAB11A, member RAS onco family	341.918	-5.35816	1.22528	-4.37299	1.22556e-05	0.00208778	TRUE
ENSECAG00000007682	STK24	serine/threonine kinase 24	200.285	-5.34789	1.40868	-3.79638	0.000146822	0.013716	TRUE
ENSECAG00000020824	EPS15	epidermal growth factor receptor pathway substrate 15	205.291	-5.32966	1.41119	-3.77671	0.000158916	0.0139461	TRUE
ENSECAG00000007715	ZNF638	zinc finger protein 638	227.84	-5.25588	1.06488	-4.93568	7.98736e-07	0.000231314	TRUE
ENSECAG00000012657	USP48	ubiquitin specific peptidase 48	192.79	-5.20711	1.46144	-3.563	0.000366635	0.0277224	TRUE
ENSECAG00000015098	MORC3	MORC family CW-type zinc finger 3	200.555	-5.13898	1.32858	-3.86803	0.000109719	0.0109568	TRUE
ENSECAG00000016999	CEP20	centrosomal protein 20	176.568	-5.13666	1.28196	-4.00689	6.15248e-05	0.00712703	TRUE
ENSECAG00000033446	REEP6	receptor accessory protein 6	128.44	-4.97837	1.43565	-3.46767	0.000524996	0.0361998	TRUE
ENSECAG00000017777	PLK1	polo like kinase 1	161.403	-4.91571	1.37653	-3.5711	0.000355487	0.0277224	TRUE
ENSECAG00000041239			147.157	-4.91349	1.41973	-3.46086	0.00053845	0.036264	TRUE
ENSECAG00000013526	RPH3A	rabphilin 3A	205.711	-4.86276	1.39411	-3.48808	0.000486503	0.0352228	TRUE
ENSECAG00000016920	BFAR	bifunctional apoptosis regulator	100.909	-4.63204	1.34822	-3.43567	0.00059108	0.0389038	TRUE
ENSECAG00000011547			359.147	-4.05784	1.19364	-3.39954	0.000675001	0.04344	TRUE
ENSECAG00000007885	ORC5	origin recognition complex subunit 5	222.235	-3.99099	1.09762	-3.63602	0.000276879	0.0235836	TRUE
ENSECAG00000039653			518.215	-3.57925	0.995122	-3.59679	0.000322168	0.0264171	TRUE
ENSECAG00000017318			1271.33	-3.53734	0.853962	-4.14227	3.43891e-05	0.00452686	TRUE
ENSECAG00000013127	PTGES3	prostaglandin E synthase 3	981.242	2.16373	0.644505	3.35719	0.000787384	0.049571	TRUE
ENSECAG00000003146	BBS4	Bardet-Biedl syndrome 4	352.897	3.90994	1.08857	3.59181	0.000328389	0.0264171	TRUE
ENSECAG00000025153	SIAH2	siah E3 ubiquitin protein ligase 2	198.653	4.13451	1.16195	3.55825	0.000373334	0.0277224	TRUE
ENSECAG00000010464	STRN3	striatin 3	439.813	4.60337	1.15927	3.97093	7.15941e-05	0.00761873	TRUE
ENSECAG00000028241			113.254	4.88873	1.29198	3.78391	0.000154381	0.0139461	TRUE
ENSECAG00000008647	POT1	protection of telomeres 1	114.18	4.89405	1.41076	3.46909	0.000522221	0.0361998	TRUE
ENSECAG00000010819	OTUD5	OTU deubiquitinase 5	329.074	5.04109	1.17953	4.27383	1.92143e-05	0.00292867	TRUE
ENSECAG00000020064	EMSY	EMSY transcriptional repressor, BRCA2 interacting	262.135	5.5463	1.35123	4.10464	4.04942e-05	0.00506214	TRUE
ENSECAG00000007917	G3BP2	G3BP stress granule assembly factor 2	151.012	5.63984	1.42271	3.96414	7.36617e-05	0.00761873	TRUE
ENSECAG00000020134	RCAN3	RCAN family member 3	140.424	5.70682	1.369	4.1686	3.06478e-05	0.00442458	TRUE
ENSECAG00000023177	TBC1D22B	TBC1 domain family member 22B	133.136	5.94869	1.49683	3.97418	7.06221e-05	0.00761873	TRUE
ENSECAG00000009552	KAT6A	lysine acetyltransferase 6A	144.34	6.69436	1.49953	4.46431	8.03269e-06	0.00145392	TRUE
ENSECAG00000013779	AFAP1	actin filament associated protein 1	224.847	6.99505	1.31575	5.31638	1.05851e-07	3.83182e-05	TRUE
ENSECAG00000015142	TOMM70	translocase of outer mitochondrial membrane 70	325.711	7.46659	0.834278	8.94976	3.56269e-19	1.03176e-15	TRUE
ENSECAG00000042810	PRR13	proline rich 13	39.129	-5.36037	1.90684	-2.81113	0.00493672	0.205335	FALSE
ENSECAG00000024593	SLC35G1	solute carrier family 35 member G1	85.4082	-4.95033	1.73018	-2.86117	0.00422085	0.188055	FALSE
ENSECAG00000007113	ATXN10	ataxin 10	124.73	-4.89194	1.66539	-2.93741	0.00330968	0.164177	FALSE
ENSECAG00000007508	IRF2	interferon regulatory factor 2	83.6612	-4.68011	1.80806	-2.58848	0.00964015	0.340462	FALSE
ENSECAG00000012562	CAMSAP2	calmodulin regulated spectrin associated protein family member 2	315.876	-4.61605	1.39149	-3.31735		1	FALSE
ENSECAG00000018268			144.957	-4.51136	1.42706	-3.1613	0.00157066	0.0891891	FALSE
ENSECAG00000021250	EXD1	exonuclease 3'-5' domain containing 1	74.8085	-4.48985	1.72681	-2.60008		1	FALSE
ENSECAG00000009115	BSDC1	BSD domain containing 1	53.4803	-4.42882	1.67406	-2.64555	0.00815573	0.306059	FALSE
ENSECAG00000002746	BRAF	B-Raf proto-onco, serine/threonine kinase	129.876	-4.36811	1.432	-3.05036	0.00228564	0.119957	FALSE
ENSECAG00000013680	TLE1	TLE family member 1, transcriptional corepressor	56.6393	-4.26942	1.87518	-2.2768	0.0227981	0.494299	FALSE
ENSECAG00000008614	LLGL2	LLGL scribble cell polarity complex component 2	77.242	-4.23963	1.47951	-2.86555	0.00416282	0.188055	FALSE
ENSECAG00000016427	MYNN	myoneurin	111.176	-4.17906	1.6821	-2.48443	0.0129761	0.402864	FALSE
ENSECAG00000023658	NUDT5	nudix hydrolase 5	85.6498	-4.16429	1.83705	-2.26684	0.0233998	0.494299	FALSE
ENSECAG00000028196	ATP5MK	ATP synthase membrane subunit k	60.6145	-4.1128	1.665	-2.47014	0.0135059	0.407429	FALSE
ENSECAG00000009118	OCLN	occludin	37.0705	-4.07201	1.95752	-2.08019	0.0375085	0.616323	FALSE
ENSECAG00000004389	MFF	mitochondrial fission factor	251.259	-4.03382	1.43582	-2.80941	0.0049632	0.205335	FALSE
ENSECAG00000014821	AAMP	angio associated migratory cell protein	155.092	-4.03268	1.38328	-2.91529	0.00355353	0.168705	FALSE
ENSECAG00000015889	KLHL36	kelch like family member 36	89.4726	-4.0022	1.60967	-2.48635	0.0129061	0.402864	FALSE
ENSECAG00000030120	CCDC121	coiled-coil domain containing 121	133.506	-3.98285	1.59186	-2.50201	0.0123492	0.402864	FALSE
ENSECAG00000024884	ZNF251	zinc finger protein 251	104.394	-3.87825	1.74345	-2.22447	0.0261171	0.525244	FALSE
ENSECAG00000007974	GALNT3	polypeptide N-acetylgalactosaminyltransferase 3	57.9913	-3.85213	1.82794	-2.10736	0.0350864	0.604823	FALSE
ENSECAG00000023937	GSDMB	gasdermin B	88.5069	-3.835	1.7828	-2.15111	0.0314675	0.576953	FALSE
ENSECAG00000017630	MOCOS	molybdenum cofactor sulfurase	169.598	-3.83124	1.54616	-2.47791	0.0132155	0.402864	FALSE
ENSECAG00000038178	HEY2	hes related family bHLH transcription factor with YRPW motif 2	170.227	-3.73044	1.64852	-2.26291	0.0236413	0.494299	FALSE
ENSECAG00000007301	ATXN2L	ataxin 2 like	188.065	-3.72872	1.18497	-3.14668	0.00165138	0.0902337	FALSE
ENSECAG00000004992	POFUT2	protein O-fucosyltransferase 2	190.187	-3.71658	1.55189	-2.39487	0.0166261	0.448501	FALSE
ENSECAG00000016568	CS	citrate synthase	47.702	-3.6832	1.91453	-1.92381	0.0543784	0.743528	FALSE
ENSECAG00000038125			93.7465	-3.68177	1.60754	-2.29031	0.0220035	0.494299	FALSE
ENSECAG00000025004	NUP54	nucleoporin 54	183.856	-3.64279	1.46499	-2.48656	0.0128985	0.402864	FALSE
ENSECAG00000009100	SLCO4C1	solute carrier organic anion transporter family member 4C1	23.1251	-3.63507	2.18953	-1.66021	0.0968726	0.971304	FALSE
ENSECAG00000004904	SMO	smoothened, frizzled class receptor	50.403	-3.59232	1.87285	-1.91811	0.0550973	0.745616	FALSE
ENSECAG00000022605	TOGARAM2	TOG array regulator of axonemal microtubules 2	73.1186	-3.58517	1.59066	-2.25388	0.0242035	0.497115	FALSE
ENSECAG00000018412	LMBRD1	LMBR1 domain containing 1	54.5609	-3.58451	1.8687	-1.91819	0.055087	0.745616	FALSE
ENSECAG00000030211			91.848	-3.56403	1.54122	-2.31248	0.0207512	0.480521	FALSE
ENSECAG00000017002	LARP1	La ribonucleoprotein 1, translational regulator	56.8493	-3.54151	1.67466	-2.11476	0.0344503	0.601181	FALSE
ENSECAG00000010852	RPS4X	ribosomal protein S4 X-linked	121.634	-3.53819	1.41542	-2.49975	0.0124281	0.402864	FALSE
ENSECAG00000021455	C22H20orf27	chromosome 22 C20orf27 homolog	85.114	-3.42108	1.4812	-2.30967	0.0209066	0.480521	FALSE
ENSECAG00000021297	SPTAN1	spectrin alpha, non-erythrocytic 1	81.5648	-3.40147	1.75063	-1.943	0.0520168	0.736654	FALSE
ENSECAG00000033949	OTUB1	OTU deubiquitinase, ubiquitin aldehyde binding 1	488.548	-3.36879	1.24989	-2.69527	0.00703325	0.268004	FALSE
ENSECAG00000000529	MAP1S	microtubule associated protein 1S	137.507	-3.30406	1.42975	-2.31095	0.0208358	0.480521	FALSE
ENSECAG00000016242			207.179	-3.3015	1.17495	-2.8099	0.00495566	0.205335	FALSE
ENSECAG00000018393	BTBD9	BTB domain containing 9	136.682	-3.29004	1.58294	-2.07844	0.0376689	0.616323	FALSE
ENSECAG00000014737	HEATR5B	HEAT repeat containing 5B	278.946	-3.27461	1.31894	-2.48276	0.013037	0.402864	FALSE
ENSECAG00000023605	SERPINE3	serpin family E member 3	128.743	-3.23999	1.55764	-2.08007	0.0375195	0.616323	FALSE
ENSECAG00000016856	SLC7A2	solute carrier family 7 member 2	115.581	-3.23131	1.65698	-1.95012	0.0511615	0.729871	FALSE
ENSECAG00000021107	TRAFD1	TRAF-type zinc finger domain containing 1	94.3199	-3.20148	1.40718	-2.27511	0.0228994	0.494299	FALSE
ENSECAG00000011648	ZDHHC5	zinc finger DHHC-type palmitoyltransferase 5	141.057	-3.19733	1.37322	-2.32835	0.0198937	0.480521	FALSE
ENSECAG00000017228	PPP1CC	protein phosphatase 1 catalytic subunit gamma	45.7112	-3.19616	2.04309	-1.56438		1	FALSE
ENSECAG00000019408	CAT	catalase	201.591	-3.19211	1.26508	-2.52324	0.0116278	0.395942	FALSE
ENSECAG00000021316	FAM221A	family with sequence similarity 221 member A	187.2	-3.19061	1.12863	-2.82698	0.00469895	0.203469	FALSE
ENSECAG00000023108	YTHDF2	YTH N6-methyladenosine RNA binding protein 2	341.971	-3.18824	1.20678	-2.64194	0.0082433	0.306059	FALSE
ENSECAG00000004224	SAP130	Sin3A associated protein 130	148.495	-3.17502	1.47608	-2.15098	0.0314774	0.576953	FALSE
ENSECAG00000018831			40.16	-3.17184	1.95954	-1.61866	0.105519	0.9853	FALSE
ENSECAG00000023820	CTSB	cathepsin B	250.287	-3.12553	1.36666	-2.28698	0.022197	0.494299	FALSE
ENSECAG00000017037	TDRD5	tudor domain containing 5	113.478	-3.12138	1.72232	-1.81231	0.0699384	0.834959	FALSE
ENSECAG00000018333	EZR	ezrin	314.957	-3.11842	1.3483	-2.31286	0.0207304	0.480521	FALSE
ENSECAG00000016297	SUPV3L1	Suv3 like RNA helicase	118.405	-3.11197	1.46028	-2.13108	0.0330827	0.591404	FALSE
ENSECAG00000006365			302.641	-3.1084	1.45249	-2.14004	0.0323511	0.581919	FALSE
ENSECAG00000032384			32.8741	-3.08552	2.00422	-1.53951	0.12368	0.999108	FALSE
ENSECAG00000012847	TTC5	tetratricopeptide repeat domain 5	213.478	-3.04916	1.25392	-2.4317	0.0150283	0.430911	FALSE
ENSECAG00000004288	CTSV	cathepsin V	55.1617	-3.03575	1.89226	-1.6043	0.108649	0.991806	FALSE
ENSECAG00000014740	YWHAH	tyrosine 3-monooxygenase/tryptophan 5-monooxygenase activation protein eta	92.3912	-3.00817	1.39145	-2.16189	0.0306263	0.575933	FALSE
ENSECAG00000005798	CNOT7	CCR4-NOT transcription complex subunit 7	86.386	-3.00606	1.47721	-2.03495	0.0418554	0.655207	FALSE
ENSECAG00000017587	ZRANB1	zinc finger RANBP2-type containing 1	88.2161	-2.98419	1.73827	-1.71675	0.0860241	0.93076	FALSE
ENSECAG00000023803	TM9SF2	transmembrane 9 superfamily member 2	57.8611	-2.97117	1.53408	-1.93678	0.0527723	0.736963	FALSE
ENSECAG00000013501	TSR3	TSR3 ribosome maturation factor	50.8145	-2.96621	1.9015	-1.55993	0.118776	0.999108	FALSE
ENSECAG00000007607	PTPRG	protein tyrosine phosphatase receptor type G	73.2418	-2.91668	1.70891	-1.70675	0.0878691	0.931394	FALSE
ENSECAG00000011808	SLC25A22	solute carrier family 25 member 22	22.745	-2.9127	2.28106	-1.2769	0.201636	0.999108	FALSE
ENSECAG00000018231	MTMR12	myotubularin related protein 12	282.222	-2.85885	1.22363	-2.33638	0.0194717	0.480521	FALSE
ENSECAG00000013554	ANXA7	annexin A7	126.74	-2.85065	1.53061	-1.86242	0.0625436	0.801443	FALSE
ENSECAG00000019205	PPP2R2A	protein phosphatase 2 regulatory subunit Balpha	221.228	-2.82321	1.35988	-2.07607	0.0378871	0.61641	FALSE
ENSECAG00000024130	ZNF609	zinc finger protein 609	529.674	-2.79566	1.17337	-2.3826	0.017191	0.448514	FALSE
ENSECAG00000019621	SP110	SP110 nuclear body protein	425.258	-2.74651	1.09194	-2.51525	0.0118947	0.395942	FALSE
ENSECAG00000013640	CEP85	centrosomal protein 85	262.861	-2.74265	1.33427	-2.05555	0.0398263	0.634377	FALSE
ENSECAG00000011148	CAPN15	calpain 15	24.3287	-2.74252	2.32277	-1.18071	0.237717	0.999108	FALSE
ENSECAG00000005770	BNIP3L	BCL2 interacting protein 3 like	794.809	-2.7196	0.86238	-3.1536	0.00161267	0.0898136	FALSE
ENSECAG00000036257			224.966	-2.71914	1.34309	-2.02454	0.0429143	0.661063	FALSE
ENSECAG00000000797	SUN2	Sad1 and UNC84 domain containing 2	21.7027	-2.69961	2.19748	-1.22851	0.219257	0.999108	FALSE
ENSECAG00000011637	SLC1A5	solute carrier family 1 member 5	52.3442	-2.68582	1.90805	-1.40763		1	FALSE
ENSECAG00000020963	DDX27	DEAD-box helicase 27	363.827	-2.68149	1.36784	-1.96038	0.0499513	0.721981	FALSE
ENSECAG00000025054	RAB5C	RAB5C, member RAS onco family	27.5563	-2.67889	2.24522	-1.19315	0.23281	0.999108	FALSE
ENSECAG00000021951	RHBDF2	rhomboid 5 homolog 2	474.321	-2.66757	0.955872	-2.79072	0.00525903	0.21153	FALSE
ENSECAG00000019637	LGALS12	galectin 12	71.2214	-2.65834	1.71356	-1.55136	0.120815	0.999108	FALSE
ENSECAG00000010079	ACP1	acid phosphatase 1	435.636	-2.64348	0.935278	-2.82641	0.00470734	0.203469	FALSE
ENSECAG00000008693	PTPN12	protein tyrosine phosphatase non-receptor type 12	379.161	-2.603	1.09038	-2.38723	0.0169757	0.448501	FALSE
ENSECAG00000010777	FAM107B	family with sequence similarity 107 member B	61.9473	-2.60194	1.99603	-1.30356	0.192383	0.999108	FALSE
ENSECAG00000002611	ETFA	electron transfer flavoprotein subunit alpha	298.444	-2.58857	1.36567	-1.89545	0.0580324	0.770926	FALSE
ENSECAG00000019077	CLTC	clathrin heavy chain	645.733	-2.55644	1.12926	-2.26381	0.0235857	0.494299	FALSE
ENSECAG00000007760	SMARCC1	SWI/SNF related, matrix associated, actin dependent regulator of chromatin subfamily c member 1	405.281	-2.51909	1.08704	-2.31737	0.0204834	0.480521	FALSE
ENSECAG00000033049	SERP1	stress associated endoplasmic reticulum protein 1	249.048	-2.50494	1.19183	-2.10177	0.0355736	0.606007	FALSE
ENSECAG00000020010	MYLIP	myosin regulatory light chain interacting protein	210.639	-2.49689	1.32771	-1.8806	0.0600259	0.77953	FALSE
ENSECAG00000021595	FAM98A	family with sequence similarity 98 member A	406.979	-2.49094	1.04401	-2.38594	0.0170356	0.448501	FALSE
ENSECAG00000018005	PMEPA1	prostate transmembrane protein, androgen induced 1	97.1798	-2.48183	1.50369	-1.6505	0.0988415	0.97439	FALSE
ENSECAG00000023517	CYRIB	CYFIP related Rac1 interactor B	245.324	-2.46964	1.44759	-1.70603	0.0880022	0.931394	FALSE
ENSECAG00000023311	ZNF106	zinc finger protein 106	164.124	-2.45081	1.49514	-1.63918	0.101175	0.983234	FALSE
ENSECAG00000042198	GPX2	glutathione peroxidase 2	152.372	-2.43688	1.74992	-1.39256	0.163752	0.999108	FALSE
ENSECAG00000016815	CFAP210	cilia and flagella associated protein 210	364.759	-2.42682	1.1766	-2.06258	0.0391528	0.629926	FALSE
ENSECAG00000017453	PROSER1	proline and serine rich 1	71.3478	-2.41795	1.67774	-1.44119	0.149531	0.999108	FALSE
ENSECAG00000010951	DNAAF4	dynein axonemal assembly factor 4	496.148	-2.41118	1.23214	-1.9569	0.0503591	0.721981	FALSE
ENSECAG00000014517	CDCA3	cell division cycle associated 3	177.049	-2.39993	1.29189	-1.85769	0.0632133	0.806457	FALSE
ENSECAG00000015661	BRDT	bromodomain testis associated	514.654	-2.38535	1.06245	-2.24514	0.0247588	0.504941	FALSE
ENSECAG00000024703	APAF1	apoptotic peptidase activating factor 1	262.619	-2.37215	1.67204	-1.41872	0.155982	0.999108	FALSE
ENSECAG00000023360	KCNK10	potassium two pore domain channel subfamily K member 10	28.1292	-2.35865	2.20471	-1.06983	0.284698	0.999108	FALSE
ENSECAG00000023879	IQGAP1	IQ motif containing GTPase activating protein 1	663.044	-2.35573	0.979618	-2.40474	0.0161838	0.446366	FALSE
ENSECAG00000011177	TESC	tescalcin	313.681	-2.33188	1.06895	-2.18146	0.0291492	0.563257	FALSE
ENSECAG00000015049	UXS1	UDP-glucuronate decarboxylase 1	47.1195	-2.32775	1.95459	-1.19091	0.233687	0.999108	FALSE
ENSECAG00000020792	CAMTA1	calmodulin binding transcription activator 1	275.408	-2.3181	1.24917	-1.85571	0.0634947	0.806495	FALSE
ENSECAG00000034988	MAPK6	mitogen-activated protein kinase 6	296.593	-2.31023	1.09345	-2.11278	0.0346197	0.601181	FALSE
ENSECAG00000007375	KIAA1328	KIAA1328	80.54	-2.29419	1.85175	-1.23893	0.21537	0.999108	FALSE
ENSECAG00000026929	CKLF	chemokine like factor	388.538	-2.28709	1.16052	-1.97074	0.0487537	0.716704	FALSE
ENSECAG00000014058	ZNF598	zinc finger protein 598, E3 ubiquitin ligase	114.532	-2.28022	1.70237	-1.33944	0.180429	0.999108	FALSE
ENSECAG00000015993	MRPL30	mitochondrial ribosomal protein L30	357.001	-2.27496	0.942935	-2.41263	0.0158378	0.442622	FALSE
ENSECAG00000021026	BCAS2	BCAS2 pre-mRNA processing factor	204.158	-2.24038	1.50491	-1.48871	0.136563	0.999108	FALSE
ENSECAG00000002987	LRRC42	leucine rich repeat containing 42	108.272	-2.23698	1.6166	-1.38375	0.166434	0.999108	FALSE
ENSECAG00000020605	TRIM2	tripartite motif containing 2	188.632	-2.23314	1.66467	-1.34149	0.179761	0.999108	FALSE
ENSECAG00000015831	UBE2I	ubiquitin conjugating enzyme E2 I	98.8019	-2.22871	1.52845	-1.45815	0.1448	0.999108	FALSE
ENSECAG00000023141	LAMC1	laminin subunit gamma 1	204.276	-2.22675	1.53847	-1.44738	0.14779	0.999108	FALSE
ENSECAG00000018626	PPP2R1A	protein phosphatase 2 scaffold subunit Aalpha	84.0879	-2.22522	1.76315	-1.26207	0.206925	0.999108	FALSE
ENSECAG00000003766	GADD45GIP1	GADD45G interacting protein 1	143.289	-2.21323	1.61362	-1.37159	0.17019	0.999108	FALSE
ENSECAG00000008425	LURAP1L	leucine rich adaptor protein 1 like	93.2006	-2.19748	1.41208	-1.5562	0.11966	0.999108	FALSE
ENSECAG00000023388	ARPIN	actin related protein 2/3 complex inhibitor	135.644	-2.18488	1.55818	-1.4022	0.160856	0.999108	FALSE
ENSECAG00000022502	REV3L	REV3 like, DNA directed polymerase zeta catalytic subunit	435.192	-2.16546	1.38542	-1.56304	0.118044	0.999108	FALSE
ENSECAG00000008742	CAPN2	calpain 2	273.801	-2.16263	1.17837	-1.83527	0.0664662	0.826121	FALSE
ENSECAG00000014963	PIK3C2A	phosphatidylinositol-4-phosphate 3-kinase catalytic subunit type 2 alpha	51.3947	-2.15457	2.03711	-1.05766		1	FALSE
ENSECAG00000013999	TSPAN3	tetraspanin 3	424.359	-2.14246	0.989292	-2.16565	0.0303377	0.574234	FALSE
ENSECAG00000036414			151.785	-2.14223	1.51338	-1.41553	0.156913	0.999108	FALSE
ENSECAG00000006205	CD7	CD7 molecule	212.216	-2.13716	1.2096	-1.76683	0.0772568	0.891377	FALSE
ENSECAG00000008412	ICE2	interactor of little elongation complex ELL subunit 2	343.325	-2.12871	1.47898	-1.43931	0.150061	0.999108	FALSE
ENSECAG00000022480	SYVN1	synoviolin 1	347.957	-2.11683	1.12769	-1.87713	0.0604998	0.782177	FALSE
ENSECAG00000011753	SESTD1	SEC14 and spectrin domain containing 1	209.621	-2.11121	1.35288	-1.56054	0.118633	0.999108	FALSE
ENSECAG00000009988	FBXO11	F-box protein 11	234.179	-2.10138	1.13949	-1.84414	0.0651633	0.82049	FALSE
ENSECAG00000017007	FANCL	FA complementation group L	342.026	-2.10094	1.32194	-1.58929	0.111996	0.999108	FALSE
ENSECAG00000014989	TMEM87A	transmembrane protein 87A	12.4942	-2.09822	2.67808	-0.783478	0.433346	0.999108	FALSE
ENSECAG00000014940	RBM22	RNA binding motif protein 22	490.786	-2.08261	1.01338	-2.05512	0.0398676	0.634377	FALSE
ENSECAG00000008524	INIP	INTS3 and NABP interacting protein	346.194	-2.06203	1.17173	-1.75981	0.0784399	0.896238	FALSE
ENSECAG00000018064	CCDC82	coiled-coil domain containing 82	214.595	-2.05898	1.53845	-1.33835	0.180783	0.999108	FALSE
ENSECAG00000020890	PM20D2	peptidase M20 domain containing 2	87.1033	-2.05007	1.71327	-1.19659	0.231468	0.999108	FALSE
ENSECAG00000019839	DNAJC17	DnaJ heat shock protein family (Hsp40) member C17	234.602	-2.03694	1.64866	-1.23551	0.21664	0.999108	FALSE
ENSECAG00000001058	SLC7A7	solute carrier family 7 member 7	237.983	-2.03416	1.4963	-1.35946	0.174002	0.999108	FALSE
ENSECAG00000015542	OSBPL8	oxysterol binding protein like 8	245.462	-2.03064	1.69236	-1.19989	0.230182	0.999108	FALSE
ENSECAG00000024126	RFC1	replication factor C subunit 1	400.542	-2.03035	1.23435	-1.64487	0.0999976	0.978355	FALSE
ENSECAG00000023011	RIPK2	receptor interacting serine/threonine kinase 2	269.903	-2.02495	1.20874	-1.67526	0.0938835	0.961558	FALSE
ENSECAG00000017754			200.73	-1.9954	1.2447	-1.60313	0.108907	0.991806	FALSE
ENSECAG00000007392	NPEPPS	aminopeptidase puromycin sensitive	201.718	-1.99325	1.17116	-1.70195	0.0887655	0.931394	FALSE
ENSECAG00000012182	GTF2A2	ral transcription factor IIA subunit 2	166.412	-1.99205	1.39382	-1.4292	0.152945	0.999108	FALSE
ENSECAG00000018454	RBBP8	RB binding protein 8, endonuclease	319.698	-1.98932	1.38374	-1.43764	0.150537	0.999108	FALSE
ENSECAG00000011102	ABCF2	ATP binding cassette subfamily F member 2	108.444	-1.9842	1.56083	-1.27124	0.203642	0.999108	FALSE
ENSECAG00000006545	NSFL1C	NSFL1 cofactor	230.837	-1.94684	1.26978	-1.53321	0.125225	0.999108	FALSE
ENSECAG00000017201	SUN1	Sad1 and UNC84 domain containing 1	15.7811	-1.93483	2.48937	-0.777235	0.43702	0.999108	FALSE
ENSECAG00000024203	FIGLA	folliculosis specific bHLH transcription factor	162.083	-1.92623	1.5225	-1.26517	0.205809	0.999108	FALSE
ENSECAG00000023808	ATAD2	ATPase family AAA domain containing 2	182.272	-1.92403	1.61196	-1.19359	0.232637	0.999108	FALSE
ENSECAG00000020653	TMEM39A	transmembrane protein 39A	185.639	-1.91991	1.34877	-1.42345	0.154605	0.999108	FALSE
ENSECAG00000024424	TNPO1	transportin 1	211.688	-1.91314	1.15091	-1.66229	0.0964548	0.971304	FALSE
ENSECAG00000036195			24.6281	-1.91193	2.11179	-0.905363	0.365273	0.999108	FALSE
ENSECAG00000020735	RBPMS	RNA binding protein, mRNA processing factor	97.8125	-1.90788	1.7907	-1.06544	0.286678	0.999108	FALSE
ENSECAG00000012108	PPP2R1B	protein phosphatase 2 scaffold subunit Abeta	284.12	-1.90293	1.4736	-1.29135	0.196582	0.999108	FALSE
ENSECAG00000006869	MAP9	microtubule associated protein 9	138.305	-1.90104	1.67443	-1.13533	0.256235	0.999108	FALSE
ENSECAG00000010110	U2AF2	U2 small nuclear RNA auxiliary factor 2	63.5999	-1.90099	1.90655	-0.997081		1	FALSE
ENSECAG00000037899			317.405	-1.88573	1.33072	-1.41708	0.15646	0.999108	FALSE
ENSECAG00000000513	PRELID3B	PRELI domain containing 3B	113.588	-1.88314	1.49363	-1.26078	0.207389	0.999108	FALSE
ENSECAG00000017712	ARHGAP35	Rho GTPase activating protein 35	261.842	-1.88111	1.3151	-1.43039	0.152605	0.999108	FALSE
ENSECAG00000023334	STRIP2	striatin interacting protein 2	25.7631	-1.87707	2.13601	-0.878774	0.379524	0.999108	FALSE
ENSECAG00000007702	NELFB	negative elongation factor complex member B	217.847	-1.87025	1.48037	-1.26337	0.206457	0.999108	FALSE
ENSECAG00000018035	TMEM131L	transmembrane 131 like	791.502	-1.86993	0.963962	-1.93983	0.0524001	0.736654	FALSE
ENSECAG00000022864	COMMD2	COMM domain containing 2	108.585	-1.86952	1.57089	-1.1901	0.234007	0.999108	FALSE
ENSECAG00000009943	RTF2	replication termination factor 2	238.477	-1.86604	1.29208	-1.44422	0.148677	0.999108	FALSE
ENSECAG00000020633	CCT3	chaperonin containing TCP1 subunit 3	147.62	-1.85978	1.46144	-1.27257	0.203171	0.999108	FALSE
ENSECAG00000017376	NEMF	nuclear export mediator factor	393.109	-1.85918	1.07069	-1.73642	0.0824888	0.915278	FALSE
ENSECAG00000018554			16.5156	-1.85761	2.58209	-0.719421	0.471882	0.999108	FALSE
ENSECAG00000016681	DDX23	DEAD-box helicase 23	285.484	-1.85622	1.30866	-1.41841	0.156071	0.999108	FALSE
ENSECAG00000025119	FRYL	FRY like transcription coactivator	86.9605	-1.85125	1.79283	-1.03258	0.3018	0.999108	FALSE
ENSECAG00000021167	JMJD6	jumonji domain containing 6, arginine demethylase and lysine hydroxylase	87.7324	-1.84865	1.67806	-1.10166	0.270609	0.999108	FALSE
ENSECAG00000019020	WDCP	WD repeat and coiled coil containing	131.539	-1.84857	1.75126	-1.05557	0.291166	0.999108	FALSE
ENSECAG00000023450	KATNBL1	katanin regulatory subunit B1 like 1	84.6349	-1.84766	1.76516	-1.04674	0.29522	0.999108	FALSE
ENSECAG00000017689	ARHGEF28	Rho guanine nucleotide exchange factor 28	220.969	-1.83796	1.27669	-1.43963	0.149972	0.999108	FALSE
ENSECAG00000004590	TIPIN	TIMELESS interacting protein	117.774	-1.83198	1.29371	-1.41607	0.156755	0.999108	FALSE
ENSECAG00000007483	NUP107	nucleoporin 107	155.759	-1.82455	1.55814	-1.17098	0.241605	0.999108	FALSE
ENSECAG00000017521	RAB18	RAB18, member RAS onco family	686.018	-1.82422	0.863648	-2.11222	0.0346676	0.601181	FALSE
ENSECAG00000020050	RPAP3	RNA polymerase II associated protein 3	577.083	-1.82016	1.12159	-1.62284	0.104623	0.9853	FALSE
ENSECAG00000010858	ANKRD37	ankyrin repeat domain 37	101.843	-1.81955	1.42965	-1.27273	0.203115	0.999108	FALSE
ENSECAG00000036787			220.061	-1.81905	1.37878	-1.31932	0.187064	0.999108	FALSE
ENSECAG00000000410	GLT8D1	glycosyltransferase 8 domain containing 1	300.046	-1.81698	1.21565	-1.49466	0.135004	0.999108	FALSE
ENSECAG00000018523	RNMT	RNA guanine-7 methyltransferase	177.821	-1.8103	1.5761	-1.14859	0.250725	0.999108	FALSE
ENSECAG00000015360	IFT122	intraflagellar transport 122	138.302	-1.80542	1.44883	-1.24612	0.212721	0.999108	FALSE
ENSECAG00000021207	THRAP3	thyroid hormone receptor associated protein 3	572.981	-1.80281	0.90669	-1.98834	0.0467745	0.698242	FALSE
ENSECAG00000016358			166.883	-1.79726	1.50397	-1.19501	0.232083	0.999108	FALSE
ENSECAG00000019039	CNST	consortin, connexin sorting protein	303.929	-1.79089	1.39172	-1.28682	0.198157	0.999108	FALSE
ENSECAG00000018309	SEC24D	SEC24 homolog D, COPII coat complex component	87.0799	-1.78318	1.69312	-1.05319	0.292254	0.999108	FALSE
ENSECAG00000021962			175.837	-1.78221	1.40761	-1.26613	0.205467	0.999108	FALSE
ENSECAG00000024835	NELL1	neural EGFL like 1	313.813	-1.7814	1.28788	-1.3832	0.166604	0.999108	FALSE
ENSECAG00000018957	CEBPZ	CCAAT enhancer binding protein zeta	97.0676	-1.78103	1.59895	-1.11388	0.265332	0.999108	FALSE
ENSECAG00000015935	ACTB	actin beta	106.616	-1.77776	1.55387	-1.14409	0.252588	0.999108	FALSE
ENSECAG00000012173	SPART	spartin	160.336	-1.76868	1.27419	-1.38808	0.165113	0.999108	FALSE
ENSECAG00000015363	KLHL22	kelch like family member 22	209.554	-1.76464	1.50103	-1.17562	0.239748	0.999108	FALSE
ENSECAG00000012463	RPS20	ribosomal protein S20	217.351	-1.7636	1.35356	-1.30293	0.192597	0.999108	FALSE
ENSECAG00000017272	SCAPER	S-phase cyclin A associated protein in the ER	628.909	-1.7634	0.861092	-2.04787	0.040573	0.642074	FALSE
ENSECAG00000013084	ARL8B	ADP ribosylation factor like GTPase 8B	117.004	-1.76152	1.70976	-1.03027	0.302883	0.999108	FALSE
ENSECAG00000010574	KLHL7	kelch like family member 7	102.469	-1.76048	1.56599	-1.1242	0.260929	0.999108	FALSE
ENSECAG00000018551	MFN1	mitofusin 1	79.3504	-1.74741	1.83584	-0.951835	0.341181	0.999108	FALSE
ENSECAG00000014371	CSNK1G2	casein kinase 1 gamma 2	47.7475	-1.746	1.96371	-0.889133	0.373931	0.999108	FALSE
ENSECAG00000036139			90.905	-1.74427	1.69252	-1.03057	0.30274	0.999108	FALSE
ENSECAG00000018370	NCAPD3	non-SMC condensin II complex subunit D3	486.328	-1.74207	0.832544	-2.09247	0.0363966	0.612817	FALSE
ENSECAG00000015530	KPNA3	karyopherin subunit alpha 3	126.12	-1.73142	1.39829	-1.23824	0.215626	0.999108	FALSE
ENSECAG00000010284	PKNOX1	PBX/knotted 1 homeobox 1	504.236	-1.70937	1.30476	-1.3101	0.190161	0.999108	FALSE
ENSECAG00000022599	RFC4	replication factor C subunit 4	199.359	-1.69311	1.4476	-1.1696	0.242164	0.999108	FALSE
ENSECAG00000043283	AGR2	anterior gradient 2, protein disulphide isomerase family member	578.958	-1.69253	1.18163	-1.43237	0.152039	0.999108	FALSE
ENSECAG00000023459	IRF2BP2	interferon regulatory factor 2 binding protein 2	117.509	-1.68699	1.70347	-0.990328	0.322014	0.999108	FALSE
ENSECAG00000000963	CMC2	C-X9-C motif containing 2	66.9796	-1.68508	1.87682	-0.897839	0.369271	0.999108	FALSE
ENSECAG00000019794	OTUD3	OTU deubiquitinase 3	312.258	-1.6809	1.16391	-1.44419	0.148685	0.999108	FALSE
ENSECAG00000005195	TSC22D1	TSC22 domain family member 1	530.514	-1.67571	1.0655	-1.5727	0.115789	0.999108	FALSE
ENSECAG00000015424	LIG1	DNA ligase 1	144.739	-1.67424	1.64691	-1.0166		1	FALSE
ENSECAG00000009308	USP27X	ubiquitin specific peptidase 27 X-linked	595.982	-1.65631	0.844646	-1.96095	0.049885	0.721981	FALSE
ENSECAG00000016265	STK10	serine/threonine kinase 10	106.972	-1.65318	1.54945	-1.06694	0.285998	0.999108	FALSE
ENSECAG00000019802	SREBF1	sterol regulatory element binding transcription factor 1	107.64	-1.65154	1.59791	-1.03356	0.301343	0.999108	FALSE
ENSECAG00000025087	SEC23B	SEC23 homolog B, COPII coat complex component	134.454	-1.63272	1.57499	-1.03665	0.299898	0.999108	FALSE
ENSECAG00000012484	NAMPT	nicotinamide phosphoribosyltransferase	51.6854	-1.63129	1.97377	-0.826483	0.40853	0.999108	FALSE
ENSECAG00000011669	TNN	tenascin N	139.445	-1.62424	1.65666	-0.980426	0.326876	0.999108	FALSE
ENSECAG00000020498	C2H1orf174	chromosome 2 C1orf174 homolog	22.0935	-1.62379	2.4001	-0.67655	0.498691	0.999108	FALSE
ENSECAG00000014003	TMEM192	transmembrane protein 192	268.211	-1.62154	1.61262	-1.00553	0.314642	0.999108	FALSE
ENSECAG00000021100	CSNK2B	casein kinase 2 beta	390.725	-1.61759	0.918348	-1.76141	0.078169	0.896238	FALSE
ENSECAG00000003872	ZNF830	zinc finger protein 830	393.504	-1.61552	1.07042	-1.50924	0.131238	0.999108	FALSE
ENSECAG00000008542			384.423	-1.61207	1.12484	-1.43315	0.151815	0.999108	FALSE
ENSECAG00000023958	ADPRH	ADP-ribosylarginine hydrolase	120.292	-1.59334	1.71127	-0.931087	0.351809	0.999108	FALSE
ENSECAG00000021657	SF3B1	splicing factor 3b subunit 1	794.729	-1.58591	0.718032	-2.20869	0.027196	0.539449	FALSE
ENSECAG00000012307	PIH1D2	PIH1 domain containing 2	239.938	-1.57626	1.38665	-1.13674	0.255647	0.999108	FALSE
ENSECAG00000020350	ZNF622	zinc finger protein 622	233.391	-1.57582	1.18282	-1.33225	0.182778	0.999108	FALSE
ENSECAG00000024246	GIGYF2	GRB10 interacting GYF protein 2	733.122	-1.57049	0.816518	-1.9234	0.0544295	0.743528	FALSE
ENSECAG00000010240	NELFA	negative elongation factor complex member A	531.45	-1.56491	0.679457	-2.30317	0.0212692	0.485004	FALSE
ENSECAG00000011472	SPRYD7	SPRY domain containing 7	84.6621	-1.56404	1.71514	-0.911904	0.361819	0.999108	FALSE
ENSECAG00000024053	MYO6	myosin VI	326.466	-1.56398	1.0712	-1.46002	0.144284	0.999108	FALSE
ENSECAG00000016697	MTIF3	mitochondrial translational initiation factor 3	530.91	-1.56323	1.085	-1.44076	0.149653	0.999108	FALSE
ENSECAG00000020120	PLAA	phospholipase A2 activating protein	142.832	-1.5554	1.7127	-0.908158	0.363795	0.999108	FALSE
ENSECAG00000012044	PTPDC1	protein tyrosine phosphatase domain containing 1	348.266	-1.55271	1.56954	-0.989276	0.322528	0.999108	FALSE
ENSECAG00000017462	TMEM150A	transmembrane protein 150A	50.444	-1.55013	1.79506	-0.863553	0.387833	0.999108	FALSE
ENSECAG00000024020	RNF145	ring finger protein 145	114.939	-1.54839	1.58588	-0.976358	0.328887	0.999108	FALSE
ENSECAG00000011036	NRBF2	nuclear receptor binding factor 2	371.792	-1.54453	1.44981	-1.06534	0.286723	0.999108	FALSE
ENSECAG00000019476	ACTN1	actinin alpha 1	435.708	-1.54123	1.06293	-1.44998	0.147065	0.999108	FALSE
ENSECAG00000007078	AMN1	antagonist of mitotic exit network 1 homolog	99.6463	-1.53585	1.8456	-0.832167	0.405315	0.999108	FALSE
ENSECAG00000013285	ATR	ATR serine/threonine kinase	768.845	-1.53473	0.802278	-1.91296		1	FALSE
ENSECAG00000006095			116.441	-1.52872	1.68951	-0.904827	0.365557	0.999108	FALSE
ENSECAG00000015336	NUP98	nucleoporin 98 and 96	424.673	-1.52174	1.10884	-1.37237	0.169948	0.999108	FALSE
ENSECAG00000016285	FOXR1	forkhead box R1	242.163	-1.51803	1.53097	-0.991549	0.321417	0.999108	FALSE
ENSECAG00000015838	ST13	ST13 Hsp70 interacting protein	336.323	-1.51764	1.18373	-1.28208	0.199814	0.999108	FALSE
ENSECAG00000015237	PIBF1	progesterone immunomodulatory binding factor 1	229.884	-1.51369	1.46471	-1.03344	0.301399	0.999108	FALSE
ENSECAG00000022295	AKAP17A	A-kinase anchoring protein 17A	179.055	-1.51165	1.41973	-1.06475	0.286991	0.999108	FALSE
ENSECAG00000016493	PHF12	PHD finger protein 12	379.705	-1.50785	1.17655	-1.28158	0.19999	0.999108	FALSE
ENSECAG00000007640	KDM6A	lysine demethylase 6A	558.38	-1.50196	1.04567	-1.43637	0.150898	0.999108	FALSE
ENSECAG00000007129	LRP6	LDL receptor related protein 6	34.9355	-1.49881	2.24368	-0.668013	0.504126	0.999108	FALSE
ENSECAG00000022641	SDF2L1	stromal cell derived factor 2 like 1	636.37	-1.49427	0.926625	-1.6126	0.106832	0.9853	FALSE
ENSECAG00000007777	NFE2L1	NFE2 like bZIP transcription factor 1	447.198	-1.49215	0.96506	-1.54617	0.122063	0.999108	FALSE
ENSECAG00000023608	TMEM171	transmembrane protein 171	215.477	-1.48158	1.48157	-1.00001		1	FALSE
ENSECAG00000013819	PPP4R3B	protein phosphatase 4 regulatory subunit 3B	1218.98	-1.47986	0.911024	-1.62439	0.104293	0.9853	FALSE
ENSECAG00000011924	CCDC25	coiled-coil domain containing 25	149.414	-1.47979	1.5537	-0.95243	0.340879	0.999108	FALSE
ENSECAG00000008445	MPDZ	multiple PDZ domain crumbs cell polarity complex component	222.29	-1.47918	1.57264	-0.940576	0.346922	0.999108	FALSE
ENSECAG00000016309	ZFYVE21	zinc finger FYVE-type containing 21	28.7632	-1.47455	2.33267	-0.63213		1	FALSE
ENSECAG00000016023	CCNO	cyclin O	168.183	-1.47355	1.43235	-1.02877	0.30359	0.999108	FALSE
ENSECAG00000016785	ERP44	endoplasmic reticulum protein 44	93.4525	-1.47147	1.67405	-0.878988	0.379408	0.999108	FALSE
ENSECAG00000020548			174.663	-1.47111	1.21649	-1.2093	0.226547	0.999108	FALSE
ENSECAG00000008303	LAMB1	laminin subunit beta 1	128.695	-1.47082	1.43692	-1.02359	0.306029	0.999108	FALSE
ENSECAG00000014842	TACC1	transforming acidic coiled-coil containing protein 1	424.076	-1.46304	1.25842	-1.1626	0.24499	0.999108	FALSE
ENSECAG00000020453	MAPKAP1	MAPK associated protein 1	377.062	-1.45222	1.18066	-1.23	0.218696	0.999108	FALSE
ENSECAG00000018012	SELENBP1	selenium binding protein 1	134.327	-1.44394	1.5775	-0.915333	0.360017	0.999108	FALSE
ENSECAG00000013918	ZFYVE16	zinc finger FYVE-type containing 16	506.045	-1.44363	0.959609	-1.5044	0.132479	0.999108	FALSE
ENSECAG00000019505	PAWR	pro-apoptotic WT1 regulator	303.243	-1.43825	1.18565	-1.21305	0.225111	0.999108	FALSE
ENSECAG00000025072	KDM2A	lysine demethylase 2A	20.7088	-1.43746	2.56332	-0.560779	0.574948	0.999108	FALSE
ENSECAG00000020867	ACTR3	actin related protein 3	142.801	-1.42781	1.7779	-0.803092	0.421922	0.999108	FALSE
ENSECAG00000017419	MTHFD2	methylenetetrahydrofolate dehydrogenase (NADP+ dependent) 2, methenyltetrahydrofolate cyclohydrolase	581.801	-1.42371	0.857593	-1.66013	0.0968887	0.971304	FALSE
ENSECAG00000008497	KIFC3	kinesin family member C3	32.7285	-1.41878	1.81709	-0.780796	0.434922	0.999108	FALSE
ENSECAG00000020294	DCLK3	doublecortin like kinase 3	87.7783	-1.41815	1.80403	-0.7861	0.431809	0.999108	FALSE
ENSECAG00000010367	RAD51AP1	RAD51 associated protein 1	721.502	-1.41764	0.896733	-1.58089	0.113903	0.999108	FALSE
ENSECAG00000009628	USP7	ubiquitin specific peptidase 7	189.786	-1.41527	1.20796	-1.17162	0.241349	0.999108	FALSE
ENSECAG00000017063	TIMM9	translocase of inner mitochondrial membrane 9	102.216	-1.40889	1.56956	-0.897634	0.369381	0.999108	FALSE
ENSECAG00000020380	COMMD8	COMM domain containing 8	239.283	-1.40876	1.49442	-0.942676	0.345847	0.999108	FALSE
ENSECAG00000010922	RAD50	RAD50 double strand break repair protein	854.381	-1.40535	0.926358	-1.51707	0.129248	0.999108	FALSE
ENSECAG00000018299	FKBP3	FKBP prolyl isomerase 3	289.362	-1.39841	1.34543	-1.03938	0.298627	0.999108	FALSE
ENSECAG00000015258	RPL18A	ribosomal protein L18a	426.135	-1.39758	1.22679	-1.13922	0.254612	0.999108	FALSE
ENSECAG00000016553	HAUS1	HAUS augmin like complex subunit 1	982.087	-1.39713	0.947777	-1.47412	0.14045	0.999108	FALSE
ENSECAG00000007672	TAF1A	TATA-box binding protein associated factor, RNA polymerase I subunit A	390.03	-1.39406	1.09192	-1.27671	0.201705	0.999108	FALSE
ENSECAG00000020948	PANK3	pantothenate kinase 3	156.91	-1.39321	1.69545	-0.821732	0.411229	0.999108	FALSE
ENSECAG00000018846	NUDCD2	NudC domain containing 2	32.2695	-1.3906	2.15522	-0.645224	0.518782	0.999108	FALSE
ENSECAG00000020281	PAK2	p21 (RAC1) activated kinase 2	314.201	-1.39047	1.25586	-1.10718	0.268217	0.999108	FALSE
ENSECAG00000017554	FAM32A	family with sequence similarity 32 member A	65.8114	-1.387	1.68749	-0.821933	0.411115	0.999108	FALSE
ENSECAG00000019236	LDLRAD3	low density lipoprotein receptor class A domain containing 3	197.153	-1.38297	1.25215	-1.10448	0.269387	0.999108	FALSE
ENSECAG00000003882	TPK1	thiamin pyrophosphokinase 1	373.476	-1.37942	1.39882	-0.986133	0.324068	0.999108	FALSE
ENSECAG00000017234	ARHGAP17	Rho GTPase activating protein 17	252.74	-1.37775	1.37012	-1.00557	0.314622	0.999108	FALSE
ENSECAG00000015952	BDNF	brain derived neurotrophic factor	172.645	-1.37738	1.33966	-1.02816	0.303875	0.999108	FALSE
ENSECAG00000009197	LANCL1	LanC like 1	250.061	-1.37605	1.37006	-1.00437	0.315199	0.999108	FALSE
ENSECAG00000024560	PTPN11	protein tyrosine phosphatase non-receptor type 11	819.984	-1.3745	1.15858	-1.18637	0.235477	0.999108	FALSE
ENSECAG00000021289	CCNE1	cyclin E1	362.984	-1.37258	1.13133	-1.21324	0.225038	0.999108	FALSE
ENSECAG00000019809	CGAS	cyclic GMP-AMP synthase	191.925	-1.36824	1.58879	-0.861179	0.389139	0.999108	FALSE
ENSECAG00000001700	GTPBP4	GTP binding protein 4	360.139	-1.36818	1.19202	-1.14779	0.251057	0.999108	FALSE
ENSECAG00000013231	CLPTM1L	CLPTM1 like	63.0795	-1.36671	1.71643	-0.796252	0.425885	0.999108	FALSE
ENSECAG00000019628	SIL1	SIL1 nucleotide exchange factor	129.946	-1.36538	1.65885	-0.82309	0.410457	0.999108	FALSE
ENSECAG00000015387	MYLK	myosin light chain kinase	649.845	-1.36153	0.843417	-1.6143	0.106462	0.9853	FALSE
ENSECAG00000026845	RNF126	ring finger protein 126	905.137	-1.35963	0.871579	-1.55996		1	FALSE
ENSECAG00000016085	SYCP2	synaptonemal complex protein 2	322.621	-1.35401	1.23847	-1.09329		1	FALSE
ENSECAG00000013983	PRPF6	pre-mRNA processing factor 6	592.707	-1.34959	0.987476	-1.36671	0.171716	0.999108	FALSE
ENSECAG00000010053	HJURP	Holliday junction recognition protein	125.646	-1.3495	1.50823	-0.894759	0.370916	0.999108	FALSE
ENSECAG00000015275			109.24	-1.33956	1.40164	-0.95571	0.339219	0.999108	FALSE
ENSECAG00000017695	KIAA0586	KIAA0586	898.668	-1.33184	0.588873	-2.26168	0.0237174	0.494299	FALSE
ENSECAG00000032622	HMX1	H6 family homeobox 1	12.3694	-1.32919	2.70476	-0.491426	0.623125	0.999108	FALSE
ENSECAG00000010646	IDE	insulin degrading enzyme	73.1415	-1.32483	1.78636	-0.741635	0.458308	0.999108	FALSE
ENSECAG00000014912	CCDC91	coiled-coil domain containing 91	790.792	-1.32397	1.11207	-1.19055	0.233829	0.999108	FALSE
ENSECAG00000018381	RPN2	ribophorin II	419.707	-1.32176	1.20566	-1.09629	0.27295	0.999108	FALSE
ENSECAG00000021891	LAS1L	LAS1 like ribosome biosis factor	215.104	-1.32146	1.55541	-0.849595	0.39555	0.999108	FALSE
ENSECAG00000023239	SSR3	signal sequence receptor subunit 3	461.27	-1.32081	2.0786	-0.635429	0.525148	0.999108	FALSE
ENSECAG00000022694	RAB6A	RAB6A, member RAS onco family	123.626	-1.31967	1.63876	-0.805283	0.420656	0.999108	FALSE
ENSECAG00000040759	MTLN	mitoregulin	56.1281	-1.31377	1.80183	-0.72913	0.465922	0.999108	FALSE
ENSECAG00000018832	GSTM3	glutathione S-transferase mu 3	1672.74	-1.31017	0.564493	-2.32097	0.0202882	0.480521	FALSE
ENSECAG00000018662	CCDC66	coiled-coil domain containing 66	732.814	-1.309	1.24007	-1.05559	0.291156	0.999108	FALSE
ENSECAG00000015746	SMC1B	structural maintenance of chromosomes 1B	437.622	-1.30634	1.21986	-1.07089	0.284219	0.999108	FALSE
ENSECAG00000024941	ALG6	ALG6 alpha-1,3-glucosyltransferase	111.572	-1.30227	1.73461	-0.750758	0.452798	0.999108	FALSE
ENSECAG00000018466	MTFR1	mitochondrial fission regulator 1	276.732	-1.29135	1.28879	-1.00199	0.31635	0.999108	FALSE
ENSECAG00000009393	ARHGAP29	Rho GTPase activating protein 29	307.583	-1.29066	1.46103	-0.883386	0.377028	0.999108	FALSE
ENSECAG00000034232			354.869	-1.28787	0.788827	-1.63264	0.102544	0.9853	FALSE
ENSECAG00000012830	CHN2	chimerin 2	208.861	-1.28609	1.61605	-0.795824	0.426134	0.999108	FALSE
ENSECAG00000025008	MKNK2	MAPK interacting serine/threonine kinase 2	279.156	-1.28353	1.08762	-1.18013	0.23795	0.999108	FALSE
ENSECAG00000022544	KMT2C	lysine methyltransferase 2C	1141.76	-1.28266	0.674696	-1.90109	0.0572907	0.76458	FALSE
ENSECAG00000008341	PLAGL2	PLAG1 like zinc finger 2	41.6314	-1.28257	1.98129	-0.647344	0.517409	0.999108	FALSE
ENSECAG00000024577	KLHL18	kelch like family member 18	114.83	-1.28247	1.79805	-0.713252	0.47569	0.999108	FALSE
ENSECAG00000009006	USP46	ubiquitin specific peptidase 46	277.253	-1.2819	1.1993	-1.06887	0.285128	0.999108	FALSE
ENSECAG00000043539			42.2953	-1.28158	1.66357	-0.770382	0.441073	0.999108	FALSE
ENSECAG00000023692	BCLAF1	BCL2 associated transcription factor 1	309.015	-1.2785	1.4195	-0.900666	0.367766	0.999108	FALSE
ENSECAG00000005101	FAM104A	family with sequence similarity 104 member A	248.603	-1.27436	0.917408	-1.38909	0.164806	0.999108	FALSE
ENSECAG00000019258	MRPL21	mitochondrial ribosomal protein L21	267.419	-1.27243	1.42754	-0.891346	0.372744	0.999108	FALSE
ENSECAG00000022401	NFXL1	nuclear transcription factor, X-box binding like 1	390.749	-1.26913	1.32063	-0.961007	0.336548	0.999108	FALSE
ENSECAG00000018506	SMAD5	SMAD family member 5	439.089	-1.26912	0.736964	-1.7221	0.0850522	0.93076	FALSE
ENSECAG00000016078	CSGALNACT2	chondroitin sulfate N-acetylgalactosaminyltransferase 2	96.2698	-1.26863	1.77317	-0.715461	0.474324	0.999108	FALSE
ENSECAG00000010425	ZNF326	zinc finger protein 326	156.274	-1.26765	1.63636	-0.774674	0.438532	0.999108	FALSE
ENSECAG00000036034	GNG5	G protein subunit gamma 5	196.836	-1.26403	1.66575	-0.758834	0.447952	0.999108	FALSE
ENSECAG00000009093	GLYR1	glyoxylate reductase 1 homolog	313.011	-1.26212	0.996559	-1.26648	0.205341	0.999108	FALSE
ENSECAG00000008800	ZMYM4	zinc finger MYM-type containing 4	292.912	-1.26151	1.63202	-0.772975	0.439537	0.999108	FALSE
ENSECAG00000012179	RGS2	regulator of G protein signaling 2	130.895	-1.25942	1.51723	-0.830078	0.406494	0.999108	FALSE
ENSECAG00000015122	ACAP2	ArfGAP with coiled-coil, ankyrin repeat and PH domains 2	245.72	-1.25866	1.56137	-0.806124	0.420171	0.999108	FALSE
ENSECAG00000009987	PCNP	PEST proteolytic signal containing nuclear protein	296.227	-1.25689	0.973332	-1.29133	0.196591	0.999108	FALSE
ENSECAG00000005267	BAG3	BAG cochaperone 3	166.878	-1.25482	1.48752	-0.843561	0.398915	0.999108	FALSE
ENSECAG00000012677	HNRNPL	heteroous nuclear ribonucleoprotein L	236.199	-1.25188	1.29819	-0.96433	0.334881	0.999108	FALSE
ENSECAG00000022690	ODC1	ornithine decarboxylase 1	147.02	-1.25122	1.39272	-0.898401	0.368972	0.999108	FALSE
ENSECAG00000010440			131.393	-1.25067	1.19156	-1.04961	0.293897	0.999108	FALSE
ENSECAG00000009627	PPP3R1	protein phosphatase 3 regulatory subunit B, alpha	741.017	-1.25037	0.842946	-1.48334	0.137985	0.999108	FALSE
ENSECAG00000014505	PTOV1	PTOV1 extended AT-hook containing adaptor protein	43.9092	-1.25018	2.03174	-0.615322	0.538342	0.999108	FALSE
ENSECAG00000010812	EDC4	enhancer of mRNA decapping 4	85.185	-1.24875	1.78322	-0.700278	0.483754	0.999108	FALSE
ENSECAG00000012365	VDAC1	voltage dependent anion channel 1	242.926	-1.24815	1.48047	-0.843076	0.399186	0.999108	FALSE
ENSECAG00000018773	RPS27A	ribosomal protein S27a	116.928	-1.24805	1.53607	-0.812494	0.416508	0.999108	FALSE
ENSECAG00000015881	EXT2	exostosin glycosyltransferase 2	216.294	-1.23841	1.58025	-0.783684	0.433225	0.999108	FALSE
ENSECAG00000021637	PSMB1	proteasome 20S subunit beta 1	432.084	-1.23219	1.19351	-1.03241	0.301881	0.999108	FALSE
ENSECAG00000018267	CENPC	centromere protein C	684.25	-1.23191	0.944474	-1.30434	0.192119	0.999108	FALSE
ENSECAG00000008851	CCNL1	cyclin L1	1806.65	-1.2137	0.685814	-1.76972	0.0767741	0.891344	FALSE
ENSECAG00000001599	RPS12	ribosomal protein S12	341.455	-1.21227	1.09335	-1.10877	0.267531	0.999108	FALSE
ENSECAG00000011226	CENPQ	centromere protein Q	84.2171	-1.20865	1.68085	-0.719072	0.472097	0.999108	FALSE
ENSECAG00000008005	AKT2	AKT serine/threonine kinase 2	169.134	-1.20677	1.07304	-1.12463	0.260748	0.999108	FALSE
ENSECAG00000014000	KLHL20	kelch like family member 20	109.673	-1.2045	1.5651	-0.769596	0.441539	0.999108	FALSE
ENSECAG00000014116	SLC38A9	solute carrier family 38 member 9	164.361	-1.20264	1.33131	-0.903351	0.366339	0.999108	FALSE
ENSECAG00000006138	AIMP1	aminoacyl tRNA synthetase complex interacting multifunctional protein 1	472.35	-1.20219	1.02489	-1.173	0.240797	0.999108	FALSE
ENSECAG00000020825	RBBP5	RB binding protein 5, histone lysine methyltransferase complex subunit	91.1238	-1.19892	1.73888	-0.689482	0.49052	0.999108	FALSE
ENSECAG00000014760	RRBP1	ribosome binding protein 1	833.487	-1.19889	0.704017	-1.70293	0.0885814	0.931394	FALSE
ENSECAG00000016465	ZDHHC20	zinc finger DHHC-type palmitoyltransferase 20	75.8793	-1.19712	1.61735	-0.740172	0.459195	0.999108	FALSE
ENSECAG00000013423	RBM39	RNA binding motif protein 39	422.181	-1.19563	1.26421	-0.945747	0.344278	0.999108	FALSE
ENSECAG00000008167	SPPL2A	signal peptide peptidase like 2A	401.616	-1.19481	1.04225	-1.14638	0.251639	0.999108	FALSE
ENSECAG00000020270	CCNE2	cyclin E2	510.572	-1.19252	1.00159	-1.19063	0.2338	0.999108	FALSE
ENSECAG00000014686	HAUS6	HAUS augmin like complex subunit 6	666.835	-1.19116	1.25859	-0.946427	0.343931	0.999108	FALSE
ENSECAG00000008375	ST7	suppression of tumorigenicity 7	191.968	-1.19036	1.60513	-0.741593	0.458334	0.999108	FALSE
ENSECAG00000026813	RPL14	ribosomal protein L14	294.713	-1.1892	1.35901	-0.875051	0.381546	0.999108	FALSE
ENSECAG00000016673			322.363	-1.18731	1.02168	-1.16211	0.245189	0.999108	FALSE
ENSECAG00000012389	BSG	basigin	653.933	-1.18262	0.977695	-1.2096	0.226432	0.999108	FALSE
ENSECAG00000000735	MKNK1	MAPK interacting serine/threonine kinase 1	169.565	-1.18002	1.29635	-0.910267	0.362682	0.999108	FALSE
ENSECAG00000010801	RNF40	ring finger protein 40	109.471	-1.17756	1.74498	-0.674831		1	FALSE
ENSECAG00000017845	GGCT	gamma-glutamylcyclotransferase	235.355	-1.17172	1.58679	-0.738422	0.460258	0.999108	FALSE
ENSECAG00000016913	MEIKIN	meiotic kinetochore factor	155.362	-1.16648	1.60167	-0.728289	0.466437	0.999108	FALSE
ENSECAG00000003330	SIRT3	sirtuin 3	69.1316	-1.16601	1.74098	-0.669746	0.50302	0.999108	FALSE
ENSECAG00000015464			364.679	-1.16584	0.957409	-1.2177	0.223338	0.999108	FALSE
ENSECAG00000022765	ZC3H8	zinc finger CCCH-type containing 8	661.295	-1.16386	0.837201	-1.39018	0.164473	0.999108	FALSE
ENSECAG00000007003	RNF168	ring finger protein 168	98.7564	-1.1584	1.88432	-0.614761	0.538713	0.999108	FALSE
ENSECAG00000013485	MFAP1	microfibril associated protein 1	445.61	-1.15788	1.02858	-1.12571	0.26029	0.999108	FALSE
ENSECAG00000016873	CPEB1	cytoplasmic polyadenylation element binding protein 1	411.698	-1.15747	0.956628	-1.20995	0.226298	0.999108	FALSE
ENSECAG00000031669	SLC48A1	solute carrier family 48 member 1	108.269	-1.15343	1.61728	-0.713193	0.475726	0.999108	FALSE
ENSECAG00000014107	C18H2orf69	chromosome 18 C2orf69 homolog	58.8159	-1.15281	2.11073	-0.546163	0.584954	0.999108	FALSE
ENSECAG00000011630	FBXO5	F-box protein 5	621.324	-1.15223	1.12766	-1.02179	0.306881	0.999108	FALSE
ENSECAG00000017197	RANBP1	RAN binding protein 1	614.658	-1.14982	0.785709	-1.46341	0.143354	0.999108	FALSE
ENSECAG00000003079	CANX	calnexin	213.406	-1.1496	1.64706	-0.697969	0.485197	0.999108	FALSE
ENSECAG00000016028	N4BP2L2	NEDD4 binding protein 2 like 2	439.872	-1.14774	1.42361	-0.806215	0.420119	0.999108	FALSE
ENSECAG00000010827	TEX15	testis expressed 15, meiosis and synapsis associated	312.699	-1.14569	1.37414	-0.833754	0.404419	0.999108	FALSE
ENSECAG00000018250	IAH1	isoamyl acetate hydrolyzing esterase 1 (putative)	116.666	-1.14266	1.60175	-0.71338	0.475611	0.999108	FALSE
ENSECAG00000021882	YWHAZ	tyrosine 3-monooxygenase/tryptophan 5-monooxygenase activation protein zeta	88.4656	-1.14041	1.71314	-0.665686	0.505612	0.999108	FALSE
ENSECAG00000031601			146.746	-1.13889	1.52607	-0.746289	0.455493	0.999108	FALSE
ENSECAG00000008101	CBX5	chromobox 5	362.086	-1.13642	1.02198	-1.11197	0.26615	0.999108	FALSE
ENSECAG00000022436	LONP2	lon peptidase 2, peroxisomal	367.748	-1.13542	1.45465	-0.780542	0.435072	0.999108	FALSE
ENSECAG00000004830	KATNAL1	katanin catalytic subunit A1 like 1	191.27	-1.1281	1.34743	-0.837223	0.402467	0.999108	FALSE
ENSECAG00000009436	HCCS	holocytochrome c synthase	248	-1.12747	1.45107	-0.776992	0.437164	0.999108	FALSE
ENSECAG00000009365	IFT88	intraflagellar transport 88	322.461	-1.12616	1.23755	-0.909992	0.362827	0.999108	FALSE
ENSECAG00000013066	ZCCHC14	zinc finger CCHC-type containing 14	249.246	-1.12182	1.47616	-0.759963	0.447277	0.999108	FALSE
ENSECAG00000043336	TDRP	testis development related protein	55.9437	-1.11976	2.10787	-0.531227		1	FALSE
ENSECAG00000015601	XPR1	xenotropic and polytropic retrovirus receptor 1	145.074	-1.11669	1.52245	-0.73348	0.463265	0.999108	FALSE
ENSECAG00000000346	EDRF1	erythroid differentiation regulatory factor 1	285.52	-1.11278	1.14324	-0.973352	0.330378	0.999108	FALSE
ENSECAG00000005729	RRAGA	Ras related GTP binding A	196.683	-1.11253	1.125	-0.98891	0.322707	0.999108	FALSE
ENSECAG00000032503			251.542	-1.10975	1.22712	-0.904355	0.365807	0.999108	FALSE
ENSECAG00000035324	HAS3	hyaluronan synthase 3	690.721	-1.10956	0.81083	-1.36843	0.171177	0.999108	FALSE
ENSECAG00000019023	ACOT9	acyl-CoA thioesterase 9	156.599	-1.10938	1.57533	-0.70422	0.481296	0.999108	FALSE
ENSECAG00000012956	DCPS	decapping enzyme, scavenger	267.749	-1.10422	1.30912	-0.843482	0.398959	0.999108	FALSE
ENSECAG00000009611	SLC15A4	solute carrier family 15 member 4	243.693	-1.10258	1.26317	-0.872865	0.382737	0.999108	FALSE
ENSECAG00000022447	ENAH	ENAH actin regulator	459.24	-1.10219	1.22754	-0.897885	0.369247	0.999108	FALSE
ENSECAG00000015274	MRPS10	mitochondrial ribosomal protein S10	617.228	-1.1021	1.20629	-0.913624	0.360915	0.999108	FALSE
ENSECAG00000021690	NDUFS6	NADH:ubiquinone oxidoreductase subunit S6	223.648	-1.10166	1.34151	-0.821208	0.411528	0.999108	FALSE
ENSECAG00000010410	BOD1L1	biorientation of chromosomes in cell division 1 like 1	2166.85	-1.10097	0.608386	-1.80966	0.0703488	0.834959	FALSE
ENSECAG00000029274			109.466	-1.09927	1.36656	-0.804409	0.421161	0.999108	FALSE
ENSECAG00000010391	STK36	serine/threonine kinase 36	151.151	-1.09541	1.4817	-0.739295	0.459728	0.999108	FALSE
ENSECAG00000004593	HAUS3	HAUS augmin like complex subunit 3	387.81	-1.09165	1.03959	-1.05007	0.293685	0.999108	FALSE
ENSECAG00000012988	UCHL5	ubiquitin C-terminal hydrolase L5	379.013	-1.09125	1.38202	-0.789607	0.429757	0.999108	FALSE
ENSECAG00000008538	SPECC1	sperm antigen with calponin homology and coiled-coil domains 1	616.795	-1.09121	1.14465	-0.953312	0.340432	0.999108	FALSE
ENSECAG00000009444	PCYT1B	phosphate cytidylyltransferase 1B, choline	243.429	-1.09058	1.46394	-0.744961	0.456295	0.999108	FALSE
ENSECAG00000020220	PAK5	p21 (RAC1) activated kinase 5	340.196	-1.08886	1.03459	-1.05246	0.29259	0.999108	FALSE
ENSECAG00000023577	VPS26C	VPS26 endosomal protein sorting factor C	113.498	-1.0847	1.74891	-0.620216		1	FALSE
ENSECAG00000002377	SPESP1	sperm equatorial segment protein 1	205.25	-1.08411	1.39314	-0.778178	0.436464	0.999108	FALSE
ENSECAG00000005331	ISOC1	isochorismatase domain containing 1	434.162	-1.08142	1.16388	-0.929152	0.352811	0.999108	FALSE
ENSECAG00000017226	WWC2	WW and C2 domain containing 2	179.89	-1.07969	1.51663	-0.711903	0.476525	0.999108	FALSE
ENSECAG00000010719	RPL35A	ribosomal protein L35a	146.762	-1.07801	1.2096	-0.891212	0.372816	0.999108	FALSE
ENSECAG00000020445	RNF146	ring finger protein 146	588.983	-1.07598	0.964238	-1.11589	0.26447	0.999108	FALSE
ENSECAG00000022010	ZNF684	zinc finger protein 684	152.833	-1.07403	1.3974	-0.768591	0.442136	0.999108	FALSE
ENSECAG00000017109	QSOX1	quiescin sulfhydryl oxidase 1	272.024	-1.0711	1.25211	-0.855432	0.392312	0.999108	FALSE
ENSECAG00000012474	TTF2	transcription termination factor 2	206.92	-1.07045	1.41973	-0.753979	0.450862	0.999108	FALSE
ENSECAG00000008202	SBDS	SBDS ribosome maturation factor	745.75	-1.07039	0.928234	-1.15315	0.24885	0.999108	FALSE
ENSECAG00000007609	CREB3L2	cAMP responsive element binding protein 3 like 2	232.665	-1.06731	1.53183	-0.696754	0.485957	0.999108	FALSE
ENSECAG00000017915	TRIM36	tripartite motif containing 36	248.858	-1.06593	1.26961	-0.839568	0.401151	0.999108	FALSE
ENSECAG00000010736	RESF1	retroelement silencing factor 1	1874.92	-1.06489	0.630207	-1.68975	0.0910754	0.948757	FALSE
ENSECAG00000021142	NKAP	NFKB activating protein	216.512	-1.06181	1.38695	-0.765575	0.443929	0.999108	FALSE
ENSECAG00000018172	MRPL22	mitochondrial ribosomal protein L22	727.513	-1.06026	1.00433	-1.05569	0.291109	0.999108	FALSE
ENSECAG00000019344	SIRT7	sirtuin 7	364.063	-1.05961	1.07726	-0.983615	0.325305	0.999108	FALSE
ENSECAG00000037047			315.886	-1.05524	0.878189	-1.20161	0.229513	0.999108	FALSE
ENSECAG00000024672	UNK	unk zinc finger	197.587	-1.04865	1.61975	-0.647414	0.517364	0.999108	FALSE
ENSECAG00000023502	PREP	prolyl endopeptidase	86.6427	-1.04615	1.84683	-0.566456	0.571084	0.999108	FALSE
ENSECAG00000024071			168.414	-1.04372	1.51638	-0.688301	0.491264	0.999108	FALSE
ENSECAG00000002541			264.842	-1.04346	0.979086	-1.06575	0.286538	0.999108	FALSE
ENSECAG00000024696	NOP58	NOP58 ribonucleoprotein	304.038	-1.03929	1.2675	-0.819955	0.412242	0.999108	FALSE
ENSECAG00000011717	UBAC1	UBA domain containing 1	241.935	-1.03763	1.28079	-0.810148	0.417855	0.999108	FALSE
ENSECAG00000012948	LDB1	LIM domain binding 1	273.602	-1.03617	1.10593	-0.936922	0.348798	0.999108	FALSE
ENSECAG00000006958	DDX59	DEAD-box helicase 59	565.894	-1.03337	1.43357	-0.720839	0.471008	0.999108	FALSE
ENSECAG00000010463	ENTR1	endosome associated trafficking regulator 1	1267.85	-1.028	0.813174	-1.26418	0.206166	0.999108	FALSE
ENSECAG00000015834	DMD	dystrophin	521.113	-1.024	1.05344	-0.972057	0.331022	0.999108	FALSE
ENSECAG00000042384			174.178	-1.01714	1.58385	-0.642194	0.520747	0.999108	FALSE
ENSECAG00000008584	AKAP10	A-kinase anchoring protein 10	264.037	-1.01433	1.40645	-0.721199	0.470787	0.999108	FALSE
ENSECAG00000031828			28.3721	-1.01323	2.21404	-0.457642	0.64721	0.999108	FALSE
ENSECAG00000011080			364.197	-1.01248	1.19356	-0.848279	0.396282	0.999108	FALSE
ENSECAG00000039007			95.09	-1.01068	1.41157	-0.716002	0.47399	0.999108	FALSE
ENSECAG00000021056	ZNF182	zinc finger protein 182	409.428	-1.00756	1.25999	-0.799657	0.42391	0.999108	FALSE
ENSECAG00000000555	PBRM1	polybromo 1	1694.18	-1.00447	0.622333	-1.61403	0.10652	0.9853	FALSE
ENSECAG00000013495	GOLGA4	golgin A4	1155.08	-1.00341	0.779968	-1.28648	0.198275	0.999108	FALSE
ENSECAG00000006127	SBNO1	strawberry notch homolog 1	461.995	-1.0009	1.19101	-0.840377	0.400697	0.999108	FALSE
ENSECAG00000013618	GTSF1	gametocyte specific factor 1	238.802	-0.997523	1.60334	-0.622155	0.53384	0.999108	FALSE
ENSECAG00000019636	ARFRP1	ADP ribosylation factor related protein 1	202.98	-0.994921	1.55848	-0.63839	0.52322	0.999108	FALSE
ENSECAG00000018858	PHF10	PHD finger protein 10	178.363	-0.992171	1.55877	-0.636509	0.524445	0.999108	FALSE
ENSECAG00000021631	CSNK1E	casein kinase 1 epsilon	337.862	-0.991921	1.37104	-0.723481	0.469384	0.999108	FALSE
ENSECAG00000016651	NSMCE4A	NSE4 homolog A, SMC5-SMC6 complex component	591.67	-0.991177	0.712142	-1.39182	0.163976	0.999108	FALSE
ENSECAG00000016131	FRMD4B	FERM domain containing 4B	181.383	-0.989422	1.60827	-0.615208	0.538417	0.999108	FALSE
ENSECAG00000015690	SHMT1	serine hydroxymethyltransferase 1	22.0723	-0.987343	2.47511	-0.398908	0.689961	0.999108	FALSE
ENSECAG00000030778			500.048	-0.98496	0.703047	-1.40099	0.161218	0.999108	FALSE
ENSECAG00000016301	MCUB	mitochondrial calcium uniporter dominant negative subunit beta	162.436	-0.98136	1.50111	-0.653756	0.513269	0.999108	FALSE
ENSECAG00000008391	PALB2	partner and localizer of BRCA2	108.871	-0.980229	1.62336	-0.603828	0.545958	0.999108	FALSE
ENSECAG00000035706	SMCO4	single-pass membrane protein with coiled-coil domains 4	35.8668	-0.977238	1.98645	-0.491952	0.622753	0.999108	FALSE
ENSECAG00000017553	SEPTIN2	septin 2	105.933	-0.976539	1.6785	-0.581791	0.560707	0.999108	FALSE
ENSECAG00000008502	NONO	non-POU domain containing octamer binding	312.991	-0.976085	1.25729	-0.776338	0.43755	0.999108	FALSE
ENSECAG00000009738	RPS19	ribosomal protein S19	219.459	-0.975765	1.47533	-0.661386	0.508365	0.999108	FALSE
ENSECAG00000010765	ACSL3	acyl-CoA synthetase long chain family member 3	2484.35	-0.974274	0.636735	-1.53011	0.12599	0.999108	FALSE
ENSECAG00000018686	PPA1	inorganic pyrophosphatase 1	97.8186	-0.974238	1.6095	-0.605305	0.544977	0.999108	FALSE
ENSECAG00000000194	ZMYM5	zinc finger MYM-type containing 5	1361.08	-0.973924	0.644016	-1.51227	0.130466	0.999108	FALSE
ENSECAG00000012908	NOL9	nucleolar protein 9	260.08	-0.972832	1.53218	-0.634934	0.525472	0.999108	FALSE
ENSECAG00000022243	MOSPD1	motile sperm domain containing 1	797.409	-0.970956	1.02632	-0.946056	0.34412	0.999108	FALSE
ENSECAG00000020253	RPS7	ribosomal protein S7	371.2	-0.970075	1.29657	-0.748186	0.454348	0.999108	FALSE
ENSECAG00000024661	ILKAP	ILK associated serine/threonine phosphatase	62.5515	-0.969896	1.83415	-0.528799		1	FALSE
ENSECAG00000022222	WASF1	WASP family member 1	274.458	-0.969276	0.958867	-1.01086	0.312086	0.999108	FALSE
ENSECAG00000024853	RSPO2	R-spondin 2	567.4	-0.968669	0.775362	-1.24931	0.211551	0.999108	FALSE
ENSECAG00000010835	CDPF1	cysteine rich DPF motif domain containing 1	161.246	-0.968193	1.68115	-0.57591	0.564676	0.999108	FALSE
ENSECAG00000015610	NDUFB4	NADH:ubiquinone oxidoreductase subunit B4	87.9211	-0.964329	1.75721	-0.548785	0.583153	0.999108	FALSE
ENSECAG00000008164	CALR	calreticulin	836.997	-0.962632	0.599805	-1.60491	0.108514	0.991806	FALSE
ENSECAG00000001964	PDHA1	pyruvate dehydrogenase E1 subunit alpha 1	179.29	-0.962467	1.69763	-0.566949	0.570749	0.999108	FALSE
ENSECAG00000011220	CREM	cAMP responsive element modulator	398.474	-0.959084	0.978457	-0.980201	0.326987	0.999108	FALSE
ENSECAG00000019133	TIGAR	TP53 induced glycolysis regulatory phosphatase	713.735	-0.958725	0.700615	-1.36841	0.171185	0.999108	FALSE
ENSECAG00000008863	BUD13	BUD13 homolog	209.863	-0.954714	1.64833	-0.5792	0.562454	0.999108	FALSE
ENSECAG00000005616	RPA2	replication protein A2	366.584	-0.952908	1.3576	-0.701906	0.482738	0.999108	FALSE
ENSECAG00000014217	RABEP1	rabaptin, RAB GTPase binding effector protein 1	994.614	-0.952437	0.673749	-1.41364	0.157468	0.999108	FALSE
ENSECAG00000038338			158.756	-0.950967	1.53099	-0.621146	0.534504	0.999108	FALSE
ENSECAG00000015910	KTN1	kinectin 1	885.152	-0.950742	0.926628	-1.02602	0.30488	0.999108	FALSE
ENSECAG00000022692	HNRNPDL	heteroous nuclear ribonucleoprotein D like	698.511	-0.949447	1.00044	-0.949028	0.342607	0.999108	FALSE
ENSECAG00000008655	DLGAP5	DLG associated protein 5	729.285	-0.949377	0.964367	-0.984456	0.324891	0.999108	FALSE
ENSECAG00000006696	TMTC4	transmembrane O-mannosyltransferase targeting cadherins 4	430.685	-0.948942	1.11777	-0.848959	0.395904	0.999108	FALSE
ENSECAG00000018303	YTHDC1	YTH domain containing 1	386.82	-0.948483	1.21281	-0.782054	0.434183	0.999108	FALSE
ENSECAG00000010159	SPAST	spastin	281.055	-0.947515	1.38428	-0.684482	0.493671	0.999108	FALSE
ENSECAG00000012339			328.615	-0.945168	1.3331	-0.709001	0.478324	0.999108	FALSE
ENSECAG00000023166	FBXO25	F-box protein 25	306.734	-0.942819	1.2985	-0.726084	0.467787	0.999108	FALSE
ENSECAG00000009751	NUP205	nucleoporin 205	266.712	-0.94248	1.5831	-0.595338	0.551617	0.999108	FALSE
ENSECAG00000017251	PARK7	Parkinsonism associated deglycase	128.168	-0.942428	1.77482	-0.530999	0.59542	0.999108	FALSE
ENSECAG00000018813	GUCY2C	guanylate cyclase 2C	168.115	-0.942354	1.07687	-0.875083	0.381529	0.999108	FALSE
ENSECAG00000018903	ACTR10	actin related protein 10	104.519	-0.942118	1.6818	-0.560186	0.575353	0.999108	FALSE
ENSECAG00000018290	GPD2	glycerol-3-phosphate dehydrogenase 2	323.746	-0.940806	1.13691	-0.827513	0.407946	0.999108	FALSE
ENSECAG00000000186	DEGS1	delta 4-desaturase, sphingolipid 1	81.4606	-0.938001	1.46573	-0.639956	0.522201	0.999108	FALSE
ENSECAG00000007658	MGLL	monoglyceride lipase	449.692	-0.93216	0.996015	-0.935889	0.34933	0.999108	FALSE
ENSECAG00000017386	ITGA1	integrin subunit alpha 1	79.3579	-0.930084	1.92791	-0.482431	0.6295	0.999108	FALSE
ENSECAG00000014554	PIGH	phosphatidylinositol glycan anchor biosynthesis class H	51.3166	-0.91632	1.91539	-0.478399	0.632366	0.999108	FALSE
ENSECAG00000021629	BTF3	basic transcription factor 3	243.925	-0.913627	1.28683	-0.709985	0.477714	0.999108	FALSE
ENSECAG00000040668			654.152	-0.909821	0.809251	-1.12428	0.260896	0.999108	FALSE
ENSECAG00000005838	MOGAT1	monoacylglycerol O-acyltransferase 1	368.85	-0.908848	1.33871	-0.678899	0.497202	0.999108	FALSE
ENSECAG00000015641	DSCC1	DNA replication and sister chromatid cohesion 1	139.886	-0.902822	1.44176	-0.626193	0.531188	0.999108	FALSE
ENSECAG00000016116	USP36	ubiquitin specific peptidase 36	315.501	-0.900881	1.28532	-0.700901	0.483365	0.999108	FALSE
ENSECAG00000010056	C1H10orf90	chromosome 1 C10orf90 homolog	255.139	-0.900608	1.29513	-0.695379	0.486818	0.999108	FALSE
ENSECAG00000005853	TAF5	TATA-box binding protein associated factor 5	645.129	-0.900374	0.777673	-1.15778	0.246954	0.999108	FALSE
ENSECAG00000021147	ATM	ATM serine/threonine kinase	316.858	-0.899493	1.55031	-0.580201	0.561779	0.999108	FALSE
ENSECAG00000018415	TANC1	tetratricopeptide repeat, ankyrin repeat and coiled-coil containing 1	950.071	-0.899402	1.01309	-0.887784	0.374657	0.999108	FALSE
ENSECAG00000008428	CEP83	centrosomal protein 83	463.904	-0.898873	1.37201	-0.655153	0.51237	0.999108	FALSE
ENSECAG00000012679	RIF1	replication timing regulatory factor 1	303.834	-0.897232	1.55	-0.578861	0.562683	0.999108	FALSE
ENSECAG00000015053	SDCBP	syndecan binding protein	123.744	-0.892984	1.11697	-0.799469	0.424018	0.999108	FALSE
ENSECAG00000017368	MTF2	metal response element binding transcription factor 2	792.581	-0.890315	0.74824	-1.18988	0.234094	0.999108	FALSE
ENSECAG00000016787			31.9427	-0.889686	1.95472	-0.455147	0.649004	0.999108	FALSE
ENSECAG00000033130			195	-0.889144	1.36892	-0.64952	0.516002	0.999108	FALSE
ENSECAG00000019178	ERH	ERH mRNA splicing and mitosis factor	125.459	-0.88795	1.34351	-0.660916	0.508666	0.999108	FALSE
ENSECAG00000011658	FAM135A	family with sequence similarity 135 member A	187.138	-0.885576	1.69776	-0.521614	0.601939	0.999108	FALSE
ENSECAG00000020187	EIF4E2	eukaryotic translation initiation factor 4E family member 2	478.762	-0.885498	1.24148	-0.713263	0.475683	0.999108	FALSE
ENSECAG00000028129			90.2438	-0.883674	1.3307	-0.664067	0.506647	0.999108	FALSE
ENSECAG00000024485	HHIP	hedgehog interacting protein	124.873	-0.881061	1.74744	-0.504201	0.61412	0.999108	FALSE
ENSECAG00000013436	TCEA1	transcription elongation factor A1	2181.44	-0.881051	0.505311	-1.74358	0.0812316	0.914401	FALSE
ENSECAG00000017819	NCOA1	nuclear receptor coactivator 1	459.753	-0.880266	0.922679	-0.954033	0.340067	0.999108	FALSE
ENSECAG00000024188	ANKRD49	ankyrin repeat domain 49	245.866	-0.880232	1.26184	-0.697577	0.485442	0.999108	FALSE
ENSECAG00000008583	USF2	upstream transcription factor 2, c-fos interacting	427.007	-0.877705	1.18651	-0.739735	0.459461	0.999108	FALSE
ENSECAG00000013062	RPSA	ribosomal protein SA	250.497	-0.875937	1.31151	-0.667883	0.504208	0.999108	FALSE
ENSECAG00000000066	NAP1L1	nucleosome assembly protein 1 like 1	4694.19	-0.874311	0.563452	-1.5517	0.120733	0.999108	FALSE
ENSECAG00000036345	SNX12	sorting nexin 12	100.282	-0.873875	1.44856	-0.603272	0.546327	0.999108	FALSE
ENSECAG00000022611	ZFHX4	zinc finger homeobox 4	191.636	-0.872276	1.14772	-0.76001	0.447249	0.999108	FALSE
ENSECAG00000019810	KIF2A	kinesin family member 2A	330.269	-0.870791	1.44439	-0.602879	0.546589	0.999108	FALSE
ENSECAG00000028045	ZNF280B	zinc finger protein 280B	200.337	-0.868363	1.46091	-0.594399	0.552245	0.999108	FALSE
ENSECAG00000008638	RERE	arginine-glutamic acid dipeptide repeats	682.164	-0.865429	0.61922	-1.39761	0.16223	0.999108	FALSE
ENSECAG00000002889	BAZ1B	bromodomain adjacent to zinc finger domain 1B	1028.54	-0.865102	0.745173	-1.16094	0.245666	0.999108	FALSE
ENSECAG00000017458	BNIP3	BCL2 interacting protein 3	340.587	-0.864934	1.35117	-0.640137	0.522084	0.999108	FALSE
ENSECAG00000019207	PARP1	poly(ADP-ribose) polymerase 1	1095.62	-0.86394	1.10633	-0.780909	0.434856	0.999108	FALSE
ENSECAG00000006861	R3HCC1L	R3H domain and coiled-coil containing 1 like	460.365	-0.863145	1.26688	-0.681315	0.495672	0.999108	FALSE
ENSECAG00000016841	MED15	mediator complex subunit 15	295.203	-0.862362	1.32488	-0.6509	0.515111	0.999108	FALSE
ENSECAG00000014402	MPHOSPH9	M-phase phosphoprotein 9	370.283	-0.86051	1.34482	-0.63987	0.522257	0.999108	FALSE
ENSECAG00000003030	RPN1	ribophorin I	259.81	-0.860087	1.15918	-0.741978	0.458101	0.999108	FALSE
ENSECAG00000021065	RPL5	ribosomal protein L5	444.271	-0.856331	1.0053	-0.851819	0.394315	0.999108	FALSE
ENSECAG00000007470	NCAPG	non-SMC condensin I complex subunit G	1158.36	-0.851543	0.835761	-1.01888	0.308259	0.999108	FALSE
ENSECAG00000002691	RSBN1L	round spermatid basic protein 1 like	174.655	-0.850336	1.23388	-0.689155	0.490726	0.999108	FALSE
ENSECAG00000009156	HTATSF1	HIV-1 Tat specific factor 1	367.889	-0.847967	1.05867	-0.800973	0.423147	0.999108	FALSE
ENSECAG00000017859	FKBP6	FKBP prolyl isomerase family member 6 (inactive)	341.096	-0.845966	1.3208	-0.640497	0.52185	0.999108	FALSE
ENSECAG00000022081	PARG	poly(ADP-ribose) glycohydrolase	477.843	-0.845825	1.13109	-0.747798	0.454582	0.999108	FALSE
ENSECAG00000022687	STT3A	STT3 oligosaccharyltransferase complex catalytic subunit A	478.587	-0.845358	1.36057	-0.621324	0.534386	0.999108	FALSE
ENSECAG00000014355	TMEM41A	transmembrane protein 41A	260.81	-0.844512	1.38946	-0.607798	0.543321	0.999108	FALSE
ENSECAG00000019399	TGS1	trimethylguanosine synthase 1	557.185	-0.84353	0.989592	-0.852402	0.393991	0.999108	FALSE
ENSECAG00000008461	DEPDC1	DEP domain containing 1	293.957	-0.843319	1.41999	-0.593889	0.552586	0.999108	FALSE
ENSECAG00000007787	HP1BP3	heterochromatin protein 1 binding protein 3	285.845	-0.839734	1.1862	-0.707922	0.478994	0.999108	FALSE
ENSECAG00000043373	CCNP	cyclin P	39.1274	-0.835539	1.8767	-0.445217		1	FALSE
ENSECAG00000008529	WWP1	WW domain containing E3 ubiquitin protein ligase 1	99.3129	-0.832624	1.57599	-0.528319	0.597278	0.999108	FALSE
ENSECAG00000025015	CDK4	cyclin dependent kinase 4	65.7676	-0.832225	1.98282	-0.419718	0.674691	0.999108	FALSE
ENSECAG00000011390	GNPTG	N-acetylglucosamine-1-phosphate transferase subunit gamma	65.1005	-0.832065	1.85328	-0.448969	0.653454	0.999108	FALSE
ENSECAG00000017122	NCKAP5	NCK associated protein 5	159.827	-0.83144	1.64567	-0.505228	0.613398	0.999108	FALSE
ENSECAG00000017154	RPL10	ribosomal protein L10	97.0058	-0.830736	1.79571	-0.462622	0.643635	0.999108	FALSE
ENSECAG00000009999	ERLIN2	ER lipid raft associated 2	203.135	-0.829763	1.47086	-0.564135	0.572662	0.999108	FALSE
ENSECAG00000006429	ANXA5	annexin A5	444.34	-0.829085	1.1407	-0.726821	0.467335	0.999108	FALSE
ENSECAG00000010283	MBTPS1	membrane bound transcription factor peptidase, site 1	279.711	-0.825836	1.28892	-0.640721	0.521704	0.999108	FALSE
ENSECAG00000022664	SNX3	sorting nexin 3	156.236	-0.818652	1.51519	-0.540296	0.588993	0.999108	FALSE
ENSECAG00000017895	MED13	mediator complex subunit 13	1123.22	-0.818532	0.829693	-0.986549	0.323864	0.999108	FALSE
ENSECAG00000012829	HDLBP	high density lipoprotein binding protein	400.289	-0.816689	1.07077	-0.762711	0.445636	0.999108	FALSE
ENSECAG00000014290	PKP4	plakophilin 4	375.427	-0.81521	1.12402	-0.725261	0.468292	0.999108	FALSE
ENSECAG00000024205	HSPA5	heat shock protein family A (Hsp70) member 5	304.119	-0.812691	1.2916	-0.629214	0.529209	0.999108	FALSE
ENSECAG00000012875	GATAD2A	GATA zinc finger domain containing 2A	119.667	-0.808337	1.69464	-0.476997	0.633364	0.999108	FALSE
ENSECAG00000019198	CSNK1G3	casein kinase 1 gamma 3	221.244	-0.806728	1.39673	-0.577585	0.563544	0.999108	FALSE
ENSECAG00000006122	TRAPPC4	trafficking protein particle complex subunit 4	114.264	-0.805488	1.32681	-0.607085	0.543795	0.999108	FALSE
ENSECAG00000024290	ATP6V0B	ATPase H+ transporting V0 subunit b	136.99	-0.802804	1.67889	-0.478174	0.632526	0.999108	FALSE
ENSECAG00000013733	HNRNPR	heteroous nuclear ribonucleoprotein R	383.216	-0.80264	1.33054	-0.603241	0.546348	0.999108	FALSE
ENSECAG00000013577	HDAC2	histone deacetylase 2	378.973	-0.802181	1.29797	-0.61803	0.536556	0.999108	FALSE
ENSECAG00000007741	CELF1	CUGBP Elav-like family member 1	456.116	-0.801004	0.809983	-0.988914	0.322705	0.999108	FALSE
ENSECAG00000011655	PCM1	pericentriolar material 1	289.425	-0.798073	1.23183	-0.647878	0.517064	0.999108	FALSE
ENSECAG00000014347	ATXN2	ataxin 2	635.822	-0.794946	0.729341	-1.08995	0.275735	0.999108	FALSE
ENSECAG00000009160	SH3GLB1	SH3 domain containing GRB2 like, endophilin B1	1581.9	-0.791138	0.663101	-1.19309	0.232835	0.999108	FALSE
ENSECAG00000026905	RPL37	ribosomal protein L37	120.047	-0.789256	1.41159	-0.559127	0.576075	0.999108	FALSE
ENSECAG00000013480	ANO4	anoctamin 4	489.758	-0.787293	0.947496	-0.830919	0.406019	0.999108	FALSE
ENSECAG00000008963	LARS1	leucyl-tRNA synthetase 1	419.265	-0.784605	1.17739	-0.666391	0.505161	0.999108	FALSE
ENSECAG00000002989	ZP1	zona pellucida glycoprotein 1	501.755	-0.78411	1.16262	-0.674435	0.500035	0.999108	FALSE
ENSECAG00000011456	ARPC2	actin related protein 2/3 complex subunit 2	859.153	-0.783319	0.686499	-1.14103	0.253856	0.999108	FALSE
ENSECAG00000014408	PLS1	plastin 1	387.995	-0.782053	1.21363	-0.644391	0.519322	0.999108	FALSE
ENSECAG00000008507	SNX7	sorting nexin 7	170.873	-0.781674	1.50973	-0.517756	0.604628	0.999108	FALSE
ENSECAG00000038120			389.765	-0.779531	0.865232	-0.90095	0.367615	0.999108	FALSE
ENSECAG00000031983	MTUS1	microtubule associated scaffold protein 1	2107.81	-0.778669	0.729425	-1.06751	0.285741	0.999108	FALSE
ENSECAG00000039662			1704.72	-0.777529	0.567981	-1.36893	0.17102	0.999108	FALSE
ENSECAG00000023746	NECAB2	N-terminal EF-hand calcium binding protein 2	88.7323	-0.776857	1.55118	-0.500816	0.616501	0.999108	FALSE
ENSECAG00000017906	PRC1	protein regulator of cytokinesis 1	4479.32	-0.776149	0.535854	-1.44843	0.147496	0.999108	FALSE
ENSECAG00000026938	RPL28	ribosomal protein L28	121.008	-0.775077	1.35973	-0.570021	0.568663	0.999108	FALSE
ENSECAG00000011492	CDCA7	cell division cycle associated 7	980.776	-0.772343	0.7765	-0.994646	0.319908	0.999108	FALSE
ENSECAG00000007687	PTPN14	protein tyrosine phosphatase non-receptor type 14	144.871	-0.771512	1.5418	-0.500396	0.616796	0.999108	FALSE
ENSECAG00000024834	KCMF1	potassium channel modulatory factor 1	82.9936	-0.770091	1.75164	-0.439639	0.660199	0.999108	FALSE
ENSECAG00000023765	IGSF9	immunoglobulin superfamily member 9	154.634	-0.764963	1.37226	-0.557449	0.577221	0.999108	FALSE
ENSECAG00000021780	S100PBP	S100P binding protein	131.33	-0.764868	1.51124	-0.506119	0.612773	0.999108	FALSE
ENSECAG00000022272	USP34	ubiquitin specific peptidase 34	309.545	-0.762992	1.5431	-0.494454	0.620985	0.999108	FALSE
ENSECAG00000004919	CACYBP	calcyclin binding protein	1357.01	-0.761453	0.562665	-1.3533	0.175961	0.999108	FALSE
ENSECAG00000003029	CDC25C	cell division cycle 25C	776.706	-0.760758	0.907064	-0.838703	0.401636	0.999108	FALSE
ENSECAG00000022362	NOL8	nucleolar protein 8	855.959	-0.757858	0.950118	-0.797646	0.425076	0.999108	FALSE
ENSECAG00000012235	BAZ2B	bromodomain adjacent to zinc finger domain 2B	301.139	-0.757551	1.42943	-0.529968	0.596134	0.999108	FALSE
ENSECAG00000011749	MSX2	msh homeobox 2	293.536	-0.757239	0.992156	-0.763225	0.445329	0.999108	FALSE
ENSECAG00000019671	ANXA11	annexin A11	206.837	-0.756499	1.23037	-0.614854	0.538651	0.999108	FALSE
ENSECAG00000021209	CRELD2	cysteine rich with EGF like domains 2	748.622	-0.755812	0.953393	-0.792761	0.427917	0.999108	FALSE
ENSECAG00000011237	DDX55	DEAD-box helicase 55	285.085	-0.747359	1.43233	-0.52178	0.601823	0.999108	FALSE
ENSECAG00000021281	KDM5A	lysine demethylase 5A	1088.29	-0.746004	0.74485	-1.00155	0.316561	0.999108	FALSE
ENSECAG00000020575	TFG	trafficking from ER to golgi regulator	207.489	-0.743063	1.21223	-0.612974	0.539893	0.999108	FALSE
ENSECAG00000019256	ARID4A	AT-rich interaction domain 4A	2962.22	-0.741394	0.613063	-1.20933	0.226537	0.999108	FALSE
ENSECAG00000008822	FASTKD2	FAST kinase domains 2	105.317	-0.737783	1.46584	-0.503318	0.614741	0.999108	FALSE
ENSECAG00000021923	GTF2F2	ral transcription factor IIF subunit 2	1362.3	-0.736305	0.566016	-1.30086	0.193308	0.999108	FALSE
ENSECAG00000041663			63.675	-0.734947	1.44755	-0.507718	0.611651	0.999108	FALSE
ENSECAG00000011360	PCGF1	polycomb group ring finger 1	220.385	-0.734663	1.36696	-0.537443	0.590962	0.999108	FALSE
ENSECAG00000006686	NCAPG2	non-SMC condensin II complex subunit G2	147.506	-0.734202	1.64481	-0.446376	0.655326	0.999108	FALSE
ENSECAG00000000438	VDAC3	voltage dependent anion channel 3	289.085	-0.734101	1.48584	-0.494066	0.621259	0.999108	FALSE
ENSECAG00000019545	BIRC6	baculoviral IAP repeat containing 6	217.505	-0.733361	1.40659	-0.521375	0.602105	0.999108	FALSE
ENSECAG00000013053	TOP2A	DNA topoisomerase II alpha	580.526	-0.731838	1.13932	-0.642344	0.52065	0.999108	FALSE
ENSECAG00000020777	LMO3	LIM domain only 3	186.43	-0.728115	1.46959	-0.495454	0.62028	0.999108	FALSE
ENSECAG00000005038	WASHC4	WASH complex subunit 4	325.754	-0.727957	1.14324	-0.636751	0.524287	0.999108	FALSE
ENSECAG00000023911	NDUFB1	NADH:ubiquinone oxidoreductase subunit B1	280.573	-0.723976	0.829963	-0.872299	0.383045	0.999108	FALSE
ENSECAG00000023420	NFKBIA	NFKB inhibitor alpha	551.164	-0.722576	1.00195	-0.721171	0.470804	0.999108	FALSE
ENSECAG00000000246	GTF2F1	ral transcription factor IIF subunit 1	345.084	-0.72074	1.03732	-0.694813	0.487173	0.999108	FALSE
ENSECAG00000016693	GOLIM4	golgi integral membrane protein 4	111.998	-0.718843	1.79287	-0.400945	0.688461	0.999108	FALSE
ENSECAG00000008976	EFCAB14	EF-hand calcium binding domain 14	592.805	-0.717233	1.22314	-0.586388	0.557615	0.999108	FALSE
ENSECAG00000008068	GNL2	G protein nucleolar 2	357.618	-0.716687	1.43808	-0.498363	0.618228	0.999108	FALSE
ENSECAG00000001669			226.497	-0.712579	1.17766	-0.605082	0.545125	0.999108	FALSE
ENSECAG00000021249	TRIM33	tripartite motif containing 33	454.515	-0.711047	1.1678	-0.608878	0.542605	0.999108	FALSE
ENSECAG00000012336	ARHGAP26	Rho GTPase activating protein 26	176.961	-0.710587	1.75516	-0.404856	0.685583	0.999108	FALSE
ENSECAG00000018222	KDM4A	lysine demethylase 4A	727.625	-0.710353	0.608372	-1.16763	0.242957	0.999108	FALSE
ENSECAG00000019975	LEF1	lymphoid enhancer binding factor 1	134.487	-0.709129	1.72455	-0.411196		1	FALSE
ENSECAG00000013629	ADD3	adducin 3	632.069	-0.707094	0.893782	-0.791126	0.428871	0.999108	FALSE
ENSECAG00000014953	KIF15	kinesin family member 15	1763.17	-0.70687	0.651007	-1.08581	0.277563	0.999108	FALSE
ENSECAG00000019159	NUP85	nucleoporin 85	575.965	-0.706159	0.683674	-1.03289	0.301656	0.999108	FALSE
ENSECAG00000012780	CBX3	chromobox 3	145.502	-0.703822	1.58705	-0.443479	0.657419	0.999108	FALSE
ENSECAG00000010238	CECR2	CECR2 histone acetyl-lysine reader	667.235	-0.701331	1.12348	-0.624251	0.532463	0.999108	FALSE
ENSECAG00000022255	EPB41	erythrocyte membrane protein band 4.1	421.664	-0.700441	1.42865	-0.490283	0.623934	0.999108	FALSE
ENSECAG00000021956	FAU	FAU ubiquitin like and ribosomal protein S30 fusion	345.423	-0.698666	1.25159	-0.558222	0.576693	0.999108	FALSE
ENSECAG00000011144	PUS7	pseudouridine synthase 7	244.925	-0.698068	1.73491	-0.402366	0.687415	0.999108	FALSE
ENSECAG00000020174	CENPW	centromere protein W	237.967	-0.695624	1.02517	-0.678543	0.497427	0.999108	FALSE
ENSECAG00000019038	KIF2C	kinesin family member 2C	626.916	-0.694828	1.02197	-0.67989	0.496574	0.999108	FALSE
ENSECAG00000021665	SGMS2	sphingomyelin synthase 2	872.64	-0.694301	0.63202	-1.09854	0.271967	0.999108	FALSE
ENSECAG00000004339	MIS18BP1	MIS18 binding protein 1	1064.43	-0.687854	0.91481	-0.751909	0.452106	0.999108	FALSE
ENSECAG00000018187	MSL2	MSL complex subunit 2	203.129	-0.687612	1.32512	-0.518904	0.603828	0.999108	FALSE
ENSECAG00000033043			294.138	-0.687381	1.03552	-0.663804	0.506816	0.999108	FALSE
ENSECAG00000022005	CHD4	chromodomain helicase DNA binding protein 4	2032.55	-0.686866	0.627321	-1.09492	0.273552	0.999108	FALSE
ENSECAG00000008100	CEP350	centrosomal protein 350	509.642	-0.686224	1.32775	-0.516833	0.605273	0.999108	FALSE
ENSECAG00000034840	TNFSF12	TNF superfamily member 12	315.925	-0.68539	1.25533	-0.545984	0.585077	0.999108	FALSE
ENSECAG00000011823	ARHGAP19	Rho GTPase activating protein 19	454.254	-0.683568	1.07371	-0.636639	0.52436	0.999108	FALSE
ENSECAG00000000252	THAP4	THAP domain containing 4	329.334	-0.681982	1.2906	-0.528424	0.597205	0.999108	FALSE
ENSECAG00000021267	PIH1D1	PIH1 domain containing 1	180.067	-0.681146	1.34595	-0.50607	0.612807	0.999108	FALSE
ENSECAG00000010136	PPP3CA	protein phosphatase 3 catalytic subunit alpha	458.629	-0.678262	0.947338	-0.715967	0.474012	0.999108	FALSE
ENSECAG00000019778	CFAP97	cilia and flagella associated protein 97	823.556	-0.677428	0.930027	-0.728397	0.466371	0.999108	FALSE
ENSECAG00000014452	KIF22	kinesin family member 22	385.294	-0.676692	1.27722	-0.529816	0.596239	0.999108	FALSE
ENSECAG00000008744	UHMK1	U2AF homology motif kinase 1	588.111	-0.675576	1.04609	-0.645809	0.518403	0.999108	FALSE
ENSECAG00000008730	MAP4K4	mitogen-activated protein kinase kinase kinase kinase 4	819.092	-0.675559	0.909982	-0.742387	0.457853	0.999108	FALSE
ENSECAG00000007262	EEA1	early endosome antigen 1	796.392	-0.674811	0.965503	-0.698921	0.484601	0.999108	FALSE
ENSECAG00000016189	USP21	ubiquitin specific peptidase 21	257.32	-0.66988	1.08721	-0.616146	0.537798	0.999108	FALSE
ENSECAG00000000648	LCORL	ligand dependent nuclear receptor corepressor like	267.882	-0.66978	1.35073	-0.495865	0.61999	0.999108	FALSE
ENSECAG00000010392	CDC123	cell division cycle 123	445.776	-0.66871	1.30902	-0.510846	0.609459	0.999108	FALSE
ENSECAG00000017447	SMS	spermine synthase	328.146	-0.668085	1.14302	-0.584491	0.55889	0.999108	FALSE
ENSECAG00000004253	FBXO34	F-box protein 34	1133.66	-0.665153	0.580042	-1.14673	0.251492	0.999108	FALSE
ENSECAG00000040586	LBHD1	LBH domain containing 1	239.097	-0.662005	1.25166	-0.528903	0.596873	0.999108	FALSE
ENSECAG00000003925			281.166	-0.661184	1.12387	-0.588308	0.556326	0.999108	FALSE
ENSECAG00000023826	ZFAND5	zinc finger AN1-type containing 5	473.977	-0.657604	0.877603	-0.749319	0.453665	0.999108	FALSE
ENSECAG00000007660	DYNC1I2	dynein cytoplasmic 1 intermediate chain 2	864.039	-0.656207	0.875365	-0.749639	0.453472	0.999108	FALSE
ENSECAG00000020305	FERMT2	FERM domain containing kindlin 2	1568.41	-0.653411	0.813759	-0.802954	0.422002	0.999108	FALSE
ENSECAG00000024842	SH3BP5	SH3 domain binding protein 5	629.794	-0.653243	0.891141	-0.733041	0.463533	0.999108	FALSE
ENSECAG00000004882	CSNK1A1	casein kinase 1 alpha 1	992.541	-0.649288	0.942613	-0.688817	0.490938	0.999108	FALSE
ENSECAG00000024605	SIN3A	SIN3 transcription regulator family member A	888.191	-0.648874	0.719945	-0.901283	0.367438	0.999108	FALSE
ENSECAG00000008887	DDX24	DEAD-box helicase 24	553.527	-0.648862	0.658858	-0.984829	0.324708	0.999108	FALSE
ENSECAG00000000319	SRP14	signal recognition particle 14	596.939	-0.648387	0.931175	-0.69631	0.486235	0.999108	FALSE
ENSECAG00000020269	XRCC4	X-ray repair cross complementing 4	144.937	-0.648188	1.40632	-0.46091	0.644863	0.999108	FALSE
ENSECAG00000009396	PABPC4	poly(A) binding protein cytoplasmic 4	645.962	-0.647882	0.858539	-0.754633	0.450469	0.999108	FALSE
ENSECAG00000007560	FXR1	FMR1 autosomal homolog 1	2342	-0.645794	0.66643	-0.969035	0.332528	0.999108	FALSE
ENSECAG00000012760	LUC7L3	LUC7 like 3 pre-mRNA splicing factor	1955.79	-0.645585	0.841727	-0.766977	0.443095	0.999108	FALSE
ENSECAG00000006637	NECTIN3	nectin cell adhesion molecule 3	1568.71	-0.642617	0.632535	-1.01594	0.309659	0.999108	FALSE
ENSECAG00000012126	RASAL2	RAS protein activator like 2	230.715	-0.642595	1.57379	-0.408311	0.683045	0.999108	FALSE
ENSECAG00000015836	NDUFA12	NADH:ubiquinone oxidoreductase subunit A12	298.628	-0.641751	1.16271	-0.551945	0.580986	0.999108	FALSE
ENSECAG00000009326	MED1	mediator complex subunit 1	431.094	-0.641052	0.823536	-0.778413	0.436325	0.999108	FALSE
ENSECAG00000040977	NOL7	nucleolar protein 7	268.072	-0.639499	1.13523	-0.563321	0.573217	0.999108	FALSE
ENSECAG00000023410	UBN2	ubinuclein 2	1303.92	-0.637646	0.825815	-0.772141	0.440031	0.999108	FALSE
ENSECAG00000020393	SYNE2	spectrin repeat containing nuclear envelope protein 2	320.842	-0.636	1.22164	-0.520612	0.602637	0.999108	FALSE
ENSECAG00000024365	DHX29	DExH-box helicase 29	982.54	-0.635552	1.05386	-0.603074	0.54646	0.999108	FALSE
ENSECAG00000010446	HSPB11	heat shock protein family B (small) member 11	287.933	-0.63511	0.902885	-0.703423	0.481792	0.999108	FALSE
ENSECAG00000007949	AKIP1	A-kinase interacting protein 1	813.907	-0.634751	0.610128	-1.04036	0.298174	0.999108	FALSE
ENSECAG00000020504	THADA	THADA armadillo repeat containing	288.731	-0.634191	1.40484	-0.451432	0.651678	0.999108	FALSE
ENSECAG00000012559	RAB7A	RAB7A, member RAS onco family	846.662	-0.633815	0.97138	-0.652489	0.514086	0.999108	FALSE
ENSECAG00000017498	KRR1	KRR1 small subunit processome component homolog	474.964	-0.63359	1.36816	-0.463098	0.643294	0.999108	FALSE
ENSECAG00000008876	PTPRE	protein tyrosine phosphatase receptor type E	337.125	-0.633333	1.303	-0.486056	0.626928	0.999108	FALSE
ENSECAG00000013917			43.4723	-0.632482	2.09094	-0.302487	0.762281	0.999108	FALSE
ENSECAG00000009911	SLC12A7	solute carrier family 12 member 7	335.052	-0.63166	1.13397	-0.557036	0.577503	0.999108	FALSE
ENSECAG00000024596	CCP110	centriolar coiled-coil protein 110	1179.76	-0.628245	0.705145	-0.890945	0.372959	0.999108	FALSE
ENSECAG00000016136	ADIPOR2	adiponectin receptor 2	398.525	-0.626973	1.14495	-0.547598	0.583968	0.999108	FALSE
ENSECAG00000024021	CADPS2	calcium dependent secretion activator 2	1052.42	-0.626935	0.563058	-1.11345	0.265517	0.999108	FALSE
ENSECAG00000024055	JUN	Jun proto-oncogene, AP-1 transcription factor subunit	30.9911	-0.6268	2.17301	-0.288447		1	FALSE
ENSECAG00000032442			32.4971	-0.626119	1.92225	-0.325722	0.744635	0.999108	FALSE
ENSECAG00000013815	RSRC2	arginine and serine rich coiled-coil 2	375.261	-0.624584	1.0915	-0.572228	0.567168	0.999108	FALSE
ENSECAG00000016044	FAXC	failed axon connections homolog, metaxin like GST domain containing	1016	-0.624262	0.821822	-0.759607	0.44749	0.999108	FALSE
ENSECAG00000023111	CLSTN1	calsyntenin 1	109.994	-0.623302	1.43036	-0.435766	0.663007	0.999108	FALSE
ENSECAG00000005653	PTP4A2	protein tyrosine phosphatase 4A2	497.591	-0.62198	1.1546	-0.538698	0.590095	0.999108	FALSE
ENSECAG00000005207	RAB4A	RAB4A, member RAS onco family	67.9225	-0.621089	2.02938	-0.306048	0.759568	0.999108	FALSE
ENSECAG00000012391	ROMO1	reactive oxygen species modulator 1	64.0971	-0.619033	1.87736	-0.329736	0.741599	0.999108	FALSE
ENSECAG00000019153	PPP2R2B	protein phosphatase 2 regulatory subunit Bbeta	507.715	-0.61886	1.04825	-0.590377	0.554938	0.999108	FALSE
ENSECAG00000016002	FBXO32	F-box protein 32	193.873	-0.617568	1.62938	-0.37902	0.704673	0.999108	FALSE
ENSECAG00000020597	PSMA2	proteasome 20S subunit alpha 2	536.699	-0.617097	0.8785	-0.702444	0.482402	0.999108	FALSE
ENSECAG00000015467	ABI1	abl interactor 1	503.894	-0.615862	1.51743	-0.405859	0.684846	0.999108	FALSE
ENSECAG00000021124	PRMT3	protein arginine methyltransferase 3	356.855	-0.615314	1.02276	-0.60162	0.547427	0.999108	FALSE
ENSECAG00000036555			518.741	-0.614603	0.976783	-0.629211	0.529211	0.999108	FALSE
ENSECAG00000007773	ZMPSTE24	zinc metallopeptidase STE24	415.634	-0.61319	1.23464	-0.496655	0.619432	0.999108	FALSE
ENSECAG00000013120	SLC26A6	solute carrier family 26 member 6	61.8845	-0.610493	1.96735	-0.310312	0.756324	0.999108	FALSE
ENSECAG00000040743	SELENOK	selenoprotein K	646.909	-0.610343	0.964251	-0.632971	0.526752	0.999108	FALSE
ENSECAG00000001100	WDSUB1	WD repeat, sterile alpha motif and U-box domain containing 1	276.364	-0.609888	1.16104	-0.525293	0.599379	0.999108	FALSE
ENSECAG00000012475	SGO1	shugoshin 1	910.371	-0.609878	0.698158	-0.873552	0.382362	0.999108	FALSE
ENSECAG00000006078	AGO2	argonaute RISC catalytic component 2	371.564	-0.607911	1.22751	-0.495238	0.620432	0.999108	FALSE
ENSECAG00000011991	LIMA1	LIM domain and actin binding 1	1626.38	-0.607309	0.500734	-1.21284	0.225191	0.999108	FALSE
ENSECAG00000007621	TRIP11	thyroid hormone receptor interactor 11	1066.47	-0.605294	0.909565	-0.665476	0.505746	0.999108	FALSE
ENSECAG00000022460	U2SURP	U2 snRNP associated SURP domain containing	636.291	-0.60451	0.926	-0.652819	0.513873	0.999108	FALSE
ENSECAG00000006986	SLC26A5	solute carrier family 26 member 5	166.926	-0.604139	1.39264	-0.43381	0.664426	0.999108	FALSE
ENSECAG00000021365	DCUN1D1	defective in cullin neddylation 1 domain containing 1	101.352	-0.602339	1.73919	-0.346332	0.729093	0.999108	FALSE
ENSECAG00000019961	ZP2	zona pellucida glycoprotein 2	380.725	-0.601661	1.14058	-0.527505	0.597843	0.999108	FALSE
ENSECAG00000003601	PSMC1	proteasome 26S subunit, ATPase 1	777.1	-0.601395	0.944539	-0.636707	0.524315	0.999108	FALSE
ENSECAG00000016261	UACA	uveal autoantigen with coiled-coil domains and ankyrin repeats	2187.12	-0.600505	0.595631	-1.00818	0.313366	0.999108	FALSE
ENSECAG00000026960	UBE2S	ubiquitin conjugating enzyme E2 S	409.789	-0.599811	0.802963	-0.746997	0.455065	0.999108	FALSE
ENSECAG00000007644	PKM	pyruvate kinase M1/2	421.123	-0.593075	1.13252	-0.523677	0.600503	0.999108	FALSE
ENSECAG00000032705	H1-3	H1.3 linker histone, cluster member	423.344	-0.593051	0.958684	-0.618609	0.536174	0.999108	FALSE
ENSECAG00000003600	MRPS31	mitochondrial ribosomal protein S31	2737.06	-0.592831	0.429717	-1.37958	0.167715	0.999108	FALSE
ENSECAG00000026888	MRPL42	mitochondrial ribosomal protein L42	213.979	-0.590883	1.5087	-0.391651	0.695316	0.999108	FALSE
ENSECAG00000010248	ZMYM1	zinc finger MYM-type containing 1	586.868	-0.582429	0.965663	-0.603139	0.546416	0.999108	FALSE
ENSECAG00000016926	GABPB1	GA binding protein transcription factor subunit beta 1	255.793	-0.580329	1.06522	-0.544798	0.585893	0.999108	FALSE
ENSECAG00000023693	ECI1	enoyl-CoA delta isomerase 1	492.285	-0.578817	0.939018	-0.616407	0.537626	0.999108	FALSE
ENSECAG00000016792			600.914	-0.576979	0.911579	-0.632945	0.52677	0.999108	FALSE
ENSECAG00000010710	WDR75	WD repeat domain 75	517.733	-0.576028	1.22054	-0.471944	0.636966	0.999108	FALSE
ENSECAG00000013245	USO1	USO1 vesicle transport factor	487.055	-0.573937	1.20759	-0.475277	0.63459	0.999108	FALSE
ENSECAG00000006256	COPRS	coordinator of PRMT5 and differentiation stimulator	537.541	-0.573725	0.831667	-0.68985	0.490289	0.999108	FALSE
ENSECAG00000009759	TNRC6B	trinucleotide repeat containing adaptor 6B	125.914	-0.573443	1.33234	-0.430403	0.666902	0.999108	FALSE
ENSECAG00000016918	TMED4	transmembrane p24 trafficking protein 4	562.009	-0.572006	0.754684	-0.757941	0.448486	0.999108	FALSE
ENSECAG00000020362	MND1	meiotic nuclear divisions 1	866.942	-0.571557	0.764567	-0.747557	0.454728	0.999108	FALSE
ENSECAG00000011453	CCDC93	coiled-coil domain containing 93	257.604	-0.56647	1.23743	-0.457779	0.647111	0.999108	FALSE
ENSECAG00000023512	MTA3	metastasis associated 1 family member 3	505.549	-0.566057	1.05234	-0.537902	0.590645	0.999108	FALSE
ENSECAG00000038893	CST3	cystatin C	283.581	-0.563541	1.31016	-0.43013	0.667101	0.999108	FALSE
ENSECAG00000003632	RANBP9	RAN binding protein 9	439.268	-0.562369	0.997678	-0.563678	0.572973	0.999108	FALSE
ENSECAG00000017967	METAP1	methionyl aminopeptidase 1	157.65	-0.559382	1.4839	-0.376968	0.706198	0.999108	FALSE
ENSECAG00000019889	ATP6AP2	ATPase H+ transporting accessory protein 2	134.411	-0.558073	1.78332	-0.312941		1	FALSE
ENSECAG00000007824	SNRPD2	small nuclear ribonucleoprotein D2 polypeptide	1274.1	-0.555705	0.523163	-1.0622	0.288144	0.999108	FALSE
ENSECAG00000013614	H1-8	H1.8 linker histone	862.103	-0.553983	0.594627	-0.931648	0.351519	0.999108	FALSE
ENSECAG00000016098	NOS1AP	nitric oxide synthase 1 adaptor protein	75.2569	-0.553274	1.62959	-0.339517	0.73422	0.999108	FALSE
ENSECAG00000024354	ZNF281	zinc finger protein 281	352.076	-0.552451	1.04113	-0.530625		1	FALSE
ENSECAG00000026867	DYNC2I1	dynein 2 intermediate chain 1	753.327	-0.550183	0.898626	-0.612249	0.540373	0.999108	FALSE
ENSECAG00000013453	CCDC178	coiled-coil domain containing 178	1040.27	-0.549882	0.74326	-0.739824	0.459407	0.999108	FALSE
ENSECAG00000020630	YTHDC2	YTH domain containing 2	467.531	-0.548594	1.28771	-0.426023	0.670091	0.999108	FALSE
ENSECAG00000016384	RORA	RAR related orphan receptor A	410.372	-0.542009	1.39625	-0.38819	0.697875	0.999108	FALSE
ENSECAG00000019676	CNPY2	canopy FGF signaling regulator 2	379.499	-0.540873	1.0461	-0.517038	0.60513	0.999108	FALSE
ENSECAG00000018322	EXO1	exonuclease 1	355.674	-0.540548	1.21752	-0.443976	0.65706	0.999108	FALSE
ENSECAG00000021791	RCBTB1	RCC1 and BTB domain containing protein 1	643.036	-0.539801	0.929864	-0.580516	0.561567	0.999108	FALSE
ENSECAG00000023930	HMGXB4	HMG-box containing 4	414.682	-0.536588	1.02913	-0.521398	0.60209	0.999108	FALSE
ENSECAG00000014582	UFL1	UFM1 specific ligase 1	2357.89	-0.536436	0.494212	-1.08544	0.277727	0.999108	FALSE
ENSECAG00000014216	ATP6AP1	ATPase H+ transporting accessory protein 1	71.9477	-0.535741	1.8123	-0.295613	0.767526	0.999108	FALSE
ENSECAG00000024965	DYRK1A	dual specificity tyrosine phosphorylation regulated kinase 1A	159.835	-0.534023	1.45631	-0.366695	0.713846	0.999108	FALSE
ENSECAG00000011257	MXD1	MAX dimerization protein 1	232.784	-0.533516	1.39594	-0.38219	0.70232	0.999108	FALSE
ENSECAG00000000700	EPRS1	glutamyl-prolyl-tRNA synthetase 1	611.365	-0.531819	1.20742	-0.440457		1	FALSE
ENSECAG00000018098	SON	SON DNA and RNA binding protein	3839.73	-0.528451	0.438003	-1.2065	0.227624	0.999108	FALSE
ENSECAG00000006038	SGO2	shugoshin 2	814.5	-0.528115	0.769433	-0.686369	0.49248	0.999108	FALSE
ENSECAG00000018169	RREB1	ras responsive element binding protein 1	122.644	-0.528061	1.38749	-0.380588	0.703509	0.999108	FALSE
ENSECAG00000022426	SWAP70	switching B cell complex subunit SWAP70	445.518	-0.528004	1.17338	-0.449985	0.652721	0.999108	FALSE
ENSECAG00000015938			1096.44	-0.527598	0.841033	-0.627322	0.530448	0.999108	FALSE
ENSECAG00000023800	AK2	adenylate kinase 2	311.634	-0.52611	1.22251	-0.430353	0.666939	0.999108	FALSE
ENSECAG00000020049	NBEAL1	neurobeachin like 1	413.741	-0.522781	0.905246	-0.577501	0.563601	0.999108	FALSE
ENSECAG00000019132	SLMAP	sarcolemma associated protein	234.082	-0.5219	1.66846	-0.312804	0.754429	0.999108	FALSE
ENSECAG00000000554	KPNA7	karyopherin subunit alpha 7	645.763	-0.520273	0.718271	-0.72434	0.468857	0.999108	FALSE
ENSECAG00000011158	CLCC1	chloride channel CLIC like 1	220.011	-0.519254	1.29838	-0.399925	0.689211	0.999108	FALSE
ENSECAG00000011107	PPP1R9B	protein phosphatase 1 regulatory subunit 9B	375.107	-0.514435	0.791237	-0.650166	0.515585	0.999108	FALSE
ENSECAG00000014542	SPICE1	spindle and centriole associated protein 1	397.463	-0.514186	1.27949	-0.401868	0.687781	0.999108	FALSE
ENSECAG00000020873	GIN1	gypsy retrotransposon integrase 1	308.63	-0.513429	1.00327	-0.511753	0.608824	0.999108	FALSE
ENSECAG00000016705	UGP2	UDP-glucose pyrophosphorylase 2	596.755	-0.512988	0.962914	-0.532745	0.59421	0.999108	FALSE
ENSECAG00000029647			2047.54	-0.512602	0.558898	-0.917165	0.359056	0.999108	FALSE
ENSECAG00000024814	SRARP	steroid receptor associated and regulated protein	366.15	-0.511141	0.895241	-0.570954	0.568031	0.999108	FALSE
ENSECAG00000000383	TOP1	DNA topoisomerase I	5755.9	-0.510697	0.527075	-0.968927	0.332582	0.999108	FALSE
ENSECAG00000015558	U2AF1	U2 small nuclear RNA auxiliary factor 1	1261.25	-0.510594	0.868684	-0.587779	0.556681	0.999108	FALSE
ENSECAG00000007222	RNF130	ring finger protein 130	610.095	-0.506697	0.978369	-0.517899	0.604528	0.999108	FALSE
ENSECAG00000010374	RNF214	ring finger protein 214	564.954	-0.505577	0.715944	-0.706168	0.480084	0.999108	FALSE
ENSECAG00000019618	FAR1	fatty acyl-CoA reductase 1	189.353	-0.504985	1.64929	-0.306182	0.759466	0.999108	FALSE
ENSECAG00000011002	ASZ1	ankyrin repeat, SAM and basic leucine zipper domain containing 1	191.172	-0.504915	1.86749	-0.270371	0.786875	0.999108	FALSE
ENSECAG00000012779			248.133	-0.504691	0.974248	-0.518031	0.604436	0.999108	FALSE
ENSECAG00000022235	LZIC	leucine zipper and CTNNBIP1 domain containing	204.458	-0.504255	1.40769	-0.358214	0.720183	0.999108	FALSE
ENSECAG00000017183	PCGF6	polycomb group ring finger 6	648.316	-0.503447	0.871943	-0.577385	0.563679	0.999108	FALSE
ENSECAG00000001187	PRCC	proline rich mitotic checkpoint control factor	626.502	-0.501256	0.741143	-0.676329	0.498832	0.999108	FALSE
ENSECAG00000014144	SMCHD1	structural maintenance of chromosomes flexible hinge domain containing 1	442.489	-0.500815	1.27413	-0.393064	0.694272	0.999108	FALSE
ENSECAG00000020307	DENND2A	DENN domain containing 2A	496.239	-0.50067	1.03802	-0.482332	0.62957	0.999108	FALSE
ENSECAG00000041507			33.9799	-0.499701	2.19989	-0.227149	0.820308	0.999108	FALSE
ENSECAG00000022576	IARS2	isoleucyl-tRNA synthetase 2, mitochondrial	216.223	-0.497919	1.30029	-0.382928	0.701773	0.999108	FALSE
ENSECAG00000035072	PFDN4	prefoldin subunit 4	216.49	-0.497408	1.12305	-0.442907	0.657833	0.999108	FALSE
ENSECAG00000008958	SOD1	superoxide dismutase 1	1402.58	-0.495931	0.702634	-0.705816	0.480302	0.999108	FALSE
ENSECAG00000019460	MPPED2	metallophosphoesterase domain containing 2	568.875	-0.495918	0.711915	-0.696598	0.486055	0.999108	FALSE
ENSECAG00000037567			416.848	-0.495813	1.08489	-0.457019	0.647657	0.999108	FALSE
ENSECAG00000015512	BCL7B	BAF chromatin remodeling complex subunit BCL7B	93.7338	-0.494634	1.47171	-0.336094	0.7368	0.999108	FALSE
ENSECAG00000009845	MRPS21	mitochondrial ribosomal protein S21	177.639	-0.491895	1.2663	-0.388452	0.697682	0.999108	FALSE
ENSECAG00000001234	MRPS5	mitochondrial ribosomal protein S5	459.632	-0.49091	1.006	-0.487982	0.625563	0.999108	FALSE
ENSECAG00000005708	ABL2	ABL proto-onco 2, non-receptor tyrosine kinase	297.68	-0.48973	1.37193	-0.356965	0.721118	0.999108	FALSE
ENSECAG00000014289	ARHGAP12	Rho GTPase activating protein 12	1266.64	-0.487926	1.05899	-0.460746	0.644981	0.999108	FALSE
ENSECAG00000019974	CFAP298	cilia and flagella associated protein 298	1081.96	-0.48585	0.593719	-0.818315	0.413177	0.999108	FALSE
ENSECAG00000024548	POLR3G	RNA polymerase III subunit G	194.245	-0.484538	1.46049	-0.331763	0.740068	0.999108	FALSE
ENSECAG00000023376	NTPCR	nucleoside-triphosphatase, cancer-related	260.465	-0.484275	1.18698	-0.407991	0.683281	0.999108	FALSE
ENSECAG00000007482	IRF6	interferon regulatory factor 6	1624.61	-0.483796	0.597564	-0.809615	0.418161	0.999108	FALSE
ENSECAG00000013489	GPATCH11	G-patch domain containing 11	195.06	-0.48153	1.58417	-0.303963	0.761156	0.999108	FALSE
ENSECAG00000000626	PDPK1	3-phosphoinositide dependent protein kinase 1	610.099	-0.479608	1.04276	-0.459943	0.645557	0.999108	FALSE
ENSECAG00000023029	ZFYVE1	zinc finger FYVE-type containing 1	445.666	-0.478474	0.954384	-0.501344	0.616129	0.999108	FALSE
ENSECAG00000013583	CD320	CD320 molecule	794.63	-0.478088	1.02659	-0.465703	0.641428	0.999108	FALSE
ENSECAG00000000064	ELOC	elongin C	269.818	-0.475392	1.13512	-0.418805	0.675359	0.999108	FALSE
ENSECAG00000005084			195.177	-0.474786	1.71867	-0.276252	0.782354	0.999108	FALSE
ENSECAG00000035490	ARL14EPL	ADP ribosylation factor like GTPase 14 effector protein like	955.084	-0.473817	0.579909	-0.817054	0.413897	0.999108	FALSE
ENSECAG00000007177	TRUB1	TruB pseudouridine synthase family member 1	253.482	-0.473508	1.31944	-0.35887	0.719692	0.999108	FALSE
ENSECAG00000013756	RBIS	ribosomal biosis factor	230.513	-0.473205	1.26037	-0.37545	0.707326	0.999108	FALSE
ENSECAG00000011055	SPTY2D1	SPT2 chromatin protein domain containing 1	414.969	-0.472787	0.813892	-0.580896	0.56131	0.999108	FALSE
ENSECAG00000024127	CENPF	centromere protein F	1635.38	-0.47129	0.686441	-0.68657	0.492353	0.999108	FALSE
ENSECAG00000009655	SINHCAF	SIN3-HDAC complex associated factor	1178.63	-0.470385	0.573894	-0.819638	0.412423	0.999108	FALSE
ENSECAG00000020286	BIRC7	baculoviral IAP repeat containing 7	218.075	-0.469609	1.35666	-0.346151	0.729229	0.999108	FALSE
ENSECAG00000009113	PRPF40A	pre-mRNA processing factor 40 homolog A	3319.21	-0.468664	0.493534	-0.949609	0.342311	0.999108	FALSE
ENSECAG00000024614	FAM161A	FAM161 centrosomal protein A	658.415	-0.468611	0.787088	-0.595372	0.551595	0.999108	FALSE
ENSECAG00000022972	TCHP	trichoplein keratin filament binding	1155.2	-0.468401	0.552086	-0.84842	0.396204	0.999108	FALSE
ENSECAG00000013331	NAGK	N-acetylglucosamine kinase	461.165	-0.467901	1.38436	-0.33799	0.73537	0.999108	FALSE
ENSECAG00000021742	MYO5A	myosin VA	1050.21	-0.467125	0.827135	-0.564751	0.572243	0.999108	FALSE
ENSECAG00000020428			610.219	-0.464798	0.773308	-0.601052	0.547806	0.999108	FALSE
ENSECAG00000024919	CDKAL1	CDK5 regulatory subunit associated protein 1 like 1	142.022	-0.464138	1.7268	-0.268785	0.788095	0.999108	FALSE
ENSECAG00000008456	SLC39A6	solute carrier family 39 member 6	127.599	-0.463018	1.43512	-0.322634	0.746973	0.999108	FALSE
ENSECAG00000013843	TUBE1	tubulin epsilon 1	770.099	-0.462493	0.684012	-0.676147	0.498947	0.999108	FALSE
ENSECAG00000010553	NGF	nerve growth factor	219.148	-0.462235	1.35351	-0.341509	0.73272	0.999108	FALSE
ENSECAG00000002920	RDX	radixin	1530.47	-0.460739	0.66037	-0.697697	0.485367	0.999108	FALSE
ENSECAG00000004289	INPP4A	inositol polyphosphate-4-phosphatase type I A	353.535	-0.457208	1.11621	-0.409607	0.682094	0.999108	FALSE
ENSECAG00000018149	RNF20	ring finger protein 20	430.121	-0.456475	1.0626	-0.429584	0.667498	0.999108	FALSE
ENSECAG00000002115			1968.02	-0.455472	0.617932	-0.737092	0.461066	0.999108	FALSE
ENSECAG00000013839	FAM214A	family with sequence similarity 214 member A	389.16	-0.45287	1.2811	-0.353502	0.723712	0.999108	FALSE
ENSECAG00000006877	CCDC88A	coiled-coil domain containing 88A	4716.81	-0.452624	0.513287	-0.881815	0.377877	0.999108	FALSE
ENSECAG00000019466	ARIH1	ariadne RBR E3 ubiquitin protein ligase 1	136.026	-0.452376	1.35615	-0.333574	0.738701	0.999108	FALSE
ENSECAG00000014820	DSP	desmoplakin	136.03	-0.452039	1.64612	-0.274609	0.783616	0.999108	FALSE
ENSECAG00000008683	FTH1	ferritin heavy chain 1	752.77	-0.450769	0.938589	-0.480262	0.631041	0.999108	FALSE
ENSECAG00000007350	SIVA1	SIVA1 apoptosis inducing factor	597.829	-0.449252	1.00581	-0.446656	0.655124	0.999108	FALSE
ENSECAG00000008506	HMMR	hyaluronan mediated motility receptor	1162.26	-0.448335	0.748649	-0.598859	0.549267	0.999108	FALSE
ENSECAG00000015390	METAP2	methionyl aminopeptidase 2	3206.27	-0.44819	0.599884	-0.747128	0.454986	0.999108	FALSE
ENSECAG00000011797	SOD2	superoxide dismutase 2	258.735	-0.446796	1.48979	-0.299906	0.764249	0.999108	FALSE
ENSECAG00000026852	ZCCHC10	zinc finger CCHC-type containing 10	1298.41	-0.446647	0.813268	-0.549201	0.582868	0.999108	FALSE
ENSECAG00000018209	CAAP1	caspase activity and apoptosis inhibitor 1	197.008	-0.44632	1.30996	-0.340713	0.73332	0.999108	FALSE
ENSECAG00000018529	MS4A1	membrane spanning 4-domains A1	751.758	-0.446301	1.12786	-0.395706	0.692322	0.999108	FALSE
ENSECAG00000019104	REN	renin	316.318	-0.446099	1.39178	-0.320524	0.748571	0.999108	FALSE
ENSECAG00000020838	USP47	ubiquitin specific peptidase 47	1563.22	-0.443194	0.573127	-0.773291	0.43935	0.999108	FALSE
ENSECAG00000034547			454.564	-0.442278	1.02138	-0.433018	0.665002	0.999108	FALSE
ENSECAG00000005661	TMEM43	transmembrane protein 43	609.838	-0.441577	1.05844	-0.417196	0.676535	0.999108	FALSE
ENSECAG00000000136	FERMT1	FERM domain containing kindlin 1	452.887	-0.440632	1.10872	-0.397425		1	FALSE
ENSECAG00000012016	FAM222B	family with sequence similarity 222 member B	113.593	-0.440056	1.26318	-0.348372	0.727561	0.999108	FALSE
ENSECAG00000016091	ATG16L1	autophagy related 16 like 1	350.258	-0.439627	1.00319	-0.43823	0.66122	0.999108	FALSE
ENSECAG00000019520	SSR1	signal sequence receptor subunit 1	783.357	-0.439612	0.701921	-0.626298	0.531119	0.999108	FALSE
ENSECAG00000017556	ATP6V1D	ATPase H+ transporting V1 subunit D	308.3	-0.439042	1.17734	-0.37291	0.709215	0.999108	FALSE
ENSECAG00000011337	ODF2	outer dense fiber of sperm tails 2	184.839	-0.438088	1.44529	-0.303115	0.761802	0.999108	FALSE
ENSECAG00000020387	MRPS18C	mitochondrial ribosomal protein S18C	175.377	-0.436129	1.28696	-0.338884	0.734697	0.999108	FALSE
ENSECAG00000002676	SMARCA5	SWI/SNF related, matrix associated, actin dependent regulator of chromatin, subfamily a, member 5	7133.83	-0.435775	0.401611	-1.08507	0.277892	0.999108	FALSE
ENSECAG00000007524	NPM3	nucleophosmin/nucleoplasmin 3	269.918	-0.43401	1.00006	-0.433985	0.664299	0.999108	FALSE
ENSECAG00000014536	KIF23	kinesin family member 23	2125.07	-0.433553	0.664571	-0.65238	0.514156	0.999108	FALSE
ENSECAG00000020821	MAGOH	mago homolog, exon junction complex subunit	2208.92	-0.431857	0.501356	-0.861378	0.38903	0.999108	FALSE
ENSECAG00000023064	DCAF12	DDB1 and CUL4 associated factor 12	270.503	-0.43143	1.32085	-0.32663	0.743948	0.999108	FALSE
ENSECAG00000022520	NDUFA6	NADH:ubiquinone oxidoreductase subunit A6	83.9414	-0.430958	1.88162	-0.229036	0.818841	0.999108	FALSE
ENSECAG00000020693	HIF3A	hypoxia inducible factor 3 subunit alpha	69.3817	-0.430802	1.60835	-0.267854	0.788812	0.999108	FALSE
ENSECAG00000022357	EIF4E1B	eukaryotic translation initiation factor 4E family member 1B	1018.88	-0.425364	0.588087	-0.723301	0.469495	0.999108	FALSE
ENSECAG00000013048	TTC32	tetratricopeptide repeat domain 32	425.909	-0.424368	1.23597	-0.343349	0.731336	0.999108	FALSE
ENSECAG00000010287	DPF1	double PHD fingers 1	407.396	-0.423412	1.18319	-0.357856		1	FALSE
ENSECAG00000016627	EFHC2	EF-hand domain containing 2	300	-0.42316	1.05561	-0.400867	0.688518	0.999108	FALSE
ENSECAG00000000260	STAU2	staufen double-stranded RNA binding protein 2	668.819	-0.422886	1.15452	-0.366289	0.71415	0.999108	FALSE
ENSECAG00000017056	BTBD10	BTB domain containing 10	143.157	-0.422146	1.74802	-0.2415	0.809168	0.999108	FALSE
ENSECAG00000016730			261.711	-0.421665	1.03309	-0.408159	0.683157	0.999108	FALSE
ENSECAG00000038277			59.6849	-0.421496	1.90796	-0.220915	0.825159	0.999108	FALSE
ENSECAG00000031899	CDC26	cell division cycle 26	90.2209	-0.417873	1.80656	-0.231309	0.817075	0.999108	FALSE
ENSECAG00000021453	TICRR	TOPBP1 interacting checkpoint and replication regulator	207.208	-0.416982	1.58692	-0.262762	0.792734	0.999108	FALSE
ENSECAG00000022498	ITGB1	integrin subunit beta 1	664.033	-0.415348	0.763742	-0.543834	0.586556	0.999108	FALSE
ENSECAG00000010336	NUCKS1	nuclear casein kinase and cyclin dependent kinase substrate 1	4547.97	-0.411991	0.483375	-0.852321	0.394036	0.999108	FALSE
ENSECAG00000008338	TARDBP	TAR DNA binding protein	461.196	-0.41106	0.903487	-0.45497	0.649131	0.999108	FALSE
ENSECAG00000010431	THOC2	THO complex 2	6714.84	-0.410697	0.477645	-0.859838	0.389878	0.999108	FALSE
ENSECAG00000026873	SRSF5	serine and arginine rich splicing factor 5	199.47	-0.409905	1.36837	-0.299558	0.764514	0.999108	FALSE
ENSECAG00000018935	SRPX	sushi repeat containing protein X-linked	1199.64	-0.409843	0.540648	-0.758059	0.448416	0.999108	FALSE
ENSECAG00000003887	PBX2	PBX homeobox 2	321.03	-0.4075	1.05229	-0.38725	0.698571	0.999108	FALSE
ENSECAG00000022843	ZC3H13	zinc finger CCCH-type containing 13	3603.67	-0.406641	0.501223	-0.811298	0.417195	0.999108	FALSE
ENSECAG00000005949	MSH6	mutS homolog 6	567.678	-0.405962	1.19072	-0.340938	0.73315	0.999108	FALSE
ENSECAG00000016800	PRRC2C	proline rich coiled-coil 2C	3900.01	-0.405937	0.65581	-0.618986	0.535926	0.999108	FALSE
ENSECAG00000016654	SRSF1	serine and arginine rich splicing factor 1	409.67	-0.404782	0.825602	-0.490287	0.623931	0.999108	FALSE
ENSECAG00000002016	THUMPD3	THUMP domain containing 3	707.353	-0.404658	0.645043	-0.627335	0.53044	0.999108	FALSE
ENSECAG00000005768	SEPTIN11	septin 11	568.826	-0.403793	1.06827	-0.377988	0.70544	0.999108	FALSE
ENSECAG00000011662	STX6	syntaxin 6	1716.79	-0.402851	0.745381	-0.540464	0.588877	0.999108	FALSE
ENSECAG00000023331	KIF20B	kinesin family member 20B	5698.76	-0.402353	0.573471	-0.70161	0.482922	0.999108	FALSE
ENSECAG00000035318			226.538	-0.398723	0.971535	-0.410405	0.681509	0.999108	FALSE
ENSECAG00000012776	RLF	RLF zinc finger	224.471	-0.395465	1.46605	-0.269748	0.787354	0.999108	FALSE
ENSECAG00000013777	YBX3	Y-box binding protein 3	177.99	-0.394872	1.71052	-0.230849	0.817432	0.999108	FALSE
ENSECAG00000021821	LAMTOR5	late endosomal/lysosomal adaptor, MAPK and MTOR activator 5	567.722	-0.394832	0.999976	-0.394841	0.69296	0.999108	FALSE
ENSECAG00000012998	APH1A	aph-1 homolog A, gamma-secretase subunit	75.4541	-0.39429	1.76726	-0.223109	0.823451	0.999108	FALSE
ENSECAG00000017221	GNB2	G protein subunit beta 2	621.489	-0.393621	0.709592	-0.554715	0.57909	0.999108	FALSE
ENSECAG00000010027	PEX11A	peroxisomal biosis factor 11 alpha	1092.42	-0.392994	0.872974	-0.450179	0.652581	0.999108	FALSE
ENSECAG00000000279	FARS2	phenylalanyl-tRNA synthetase 2, mitochondrial	830.913	-0.392033	0.702926	-0.557715	0.577039	0.999108	FALSE
ENSECAG00000000354	PLK2	polo like kinase 2	380.661	-0.391086	1.17158	-0.333809	0.738523	0.999108	FALSE
ENSECAG00000023019	KIF18B	kinesin family member 18B	96.2755	-0.390703	1.64835	-0.237027	0.812636	0.999108	FALSE
ENSECAG00000017887			135.356	-0.386004	1.59472	-0.242051		1	FALSE
ENSECAG00000024410	EMC3	ER membrane protein complex subunit 3	84.3627	-0.385793	1.8893	-0.2042	0.838198	0.999108	FALSE
ENSECAG00000021957	TRIM24	tripartite motif containing 24	868.888	-0.384264	0.895842	-0.428941	0.667966	0.999108	FALSE
ENSECAG00000016191	MITD1	microtubule interacting and trafficking domain containing 1	155.664	-0.383958	1.50848	-0.254532	0.799084	0.999108	FALSE
ENSECAG00000006883	ZCCHC7	zinc finger CCHC-type containing 7	270.952	-0.382725	1.50166	-0.254867		1	FALSE
ENSECAG00000021318	PRPF8	pre-mRNA processing factor 8	243.632	-0.381715	1.46786	-0.260048	0.794827	0.999108	FALSE
ENSECAG00000015883	AOPEP	aminopeptidase O (putative)	652.044	-0.381512	1.01957	-0.374189	0.708264	0.999108	FALSE
ENSECAG00000010182	RGS22	regulator of G protein signaling 22	691.524	-0.381194	1.3368	-0.285154	0.775526	0.999108	FALSE
ENSECAG00000014081	WWC1	WW and C2 domain containing 1	240.025	-0.380257	1.41245	-0.269218	0.787762	0.999108	FALSE
ENSECAG00000035105			85.3884	-0.378581	1.815	-0.208585	0.834773	0.999108	FALSE
ENSECAG00000014890	BRCA2	BRCA2 DNA repair associated	2654.57	-0.375316	0.447077	-0.839488	0.401195	0.999108	FALSE
ENSECAG00000019264	PICALM	phosphatidylinositol binding clathrin assembly protein	131.34	-0.374675	1.56378	-0.239595	0.810644	0.999108	FALSE
ENSECAG00000008390	FOXN2	forkhead box N2	460.517	-0.374438	1.36947	-0.273418	0.784532	0.999108	FALSE
ENSECAG00000014928	RPS13	ribosomal protein S13	186.276	-0.374287	1.36718	-0.273767	0.784264	0.999108	FALSE
ENSECAG00000015757	RPL26	ribosomal protein L26	395.113	-0.373937	1.19481	-0.312967	0.754306	0.999108	FALSE
ENSECAG00000005508	SPATS2	spermatosis associated serine rich 2	357.66	-0.37134	1.28662	-0.288617	0.772874	0.999108	FALSE
ENSECAG00000010836	ZBTB38	zinc finger and BTB domain containing 38	932.462	-0.368282	0.729849	-0.504601	0.613839	0.999108	FALSE
ENSECAG00000014446	SPTBN1	spectrin beta, non-erythrocytic 1	261.748	-0.365608	1.26239	-0.289616	0.77211	0.999108	FALSE
ENSECAG00000020843	C8orf76	chromosome 8 open reading frame 76	130.298	-0.365306	1.77016	-0.206369	0.836503	0.999108	FALSE
ENSECAG00000012089	BRD2	bromodomain containing 2	759.144	-0.363883	0.816648	-0.445581	0.6559	0.999108	FALSE
ENSECAG00000014563	POLR1F	RNA polymerase I subunit F	1547.45	-0.362599	0.474843	-0.763618	0.445095	0.999108	FALSE
ENSECAG00000021950	NPM1	nucleophosmin 1	2095.41	-0.362179	0.598992	-0.604647	0.545414	0.999108	FALSE
ENSECAG00000012606	EXOSC8	exosome component 8	130.859	-0.361193	1.74973	-0.206429	0.836456	0.999108	FALSE
ENSECAG00000024076	PRMT1	protein arginine methyltransferase 1	1356.82	-0.358955	0.624035	-0.575217	0.565145	0.999108	FALSE
ENSECAG00000022741	CDC42EP3	CDC42 effector protein 3	2361.58	-0.357509	0.50004	-0.714961	0.474633	0.999108	FALSE
ENSECAG00000000293	MYO3B	myosin IIIB	192.213	-0.356467	1.4412	-0.247341	0.804644	0.999108	FALSE
ENSECAG00000022649	SMAD1	SMAD family member 1	414.417	-0.35539	0.848819	-0.418688	0.675444	0.999108	FALSE
ENSECAG00000011192	LBR	lamin B receptor	1151.81	-0.355283	0.639655	-0.555429	0.578601	0.999108	FALSE
ENSECAG00000001926	FBXO31	F-box protein 31	1219.03	-0.353835	0.626404	-0.564867	0.572164	0.999108	FALSE
ENSECAG00000017333	SF3A3	splicing factor 3a subunit 3	305.971	-0.352817	1.40869	-0.250458	0.802233	0.999108	FALSE
ENSECAG00000024810	PLA2G4A	phospholipase A2 group IVA	317.909	-0.352709	1.33803	-0.263602	0.792086	0.999108	FALSE
ENSECAG00000032798	RAB10	RAB10, member RAS onco family	112.803	-0.352186	1.80792	-0.194802	0.845548	0.999108	FALSE
ENSECAG00000026844	UTP23	UTP23 small subunit processome component	2769.12	-0.352121	0.502294	-0.701026	0.483287	0.999108	FALSE
ENSECAG00000024916	PKN2	protein kinase N2	1506.85	-0.352117	0.55787	-0.631181	0.527922	0.999108	FALSE
ENSECAG00000019719			280.815	-0.351599	1.11621	-0.314993	0.752767	0.999108	FALSE
ENSECAG00000020780	PELP1	proline, glutamate and leucine rich protein 1	167.447	-0.351491	1.5385	-0.228464	0.819286	0.999108	FALSE
ENSECAG00000024820	PHF20	PHD finger protein 20	281.763	-0.351285	1.25149	-0.280693	0.778946	0.999108	FALSE
ENSECAG00000000331	KDM1B	lysine demethylase 1B	493.643	-0.350546	1.15108	-0.304537	0.760719	0.999108	FALSE
ENSECAG00000009962	MSH3	mutS homolog 3	740.847	-0.350433	0.77152	-0.454211	0.649677	0.999108	FALSE
ENSECAG00000015774	OOSP2	oocyte secreted protein 2	148.208	-0.348726	1.64401	-0.212119	0.832014	0.999108	FALSE
ENSECAG00000021810	MMAA	metabolism of cobalamin associated A	424.074	-0.348397	1.24373	-0.280122	0.779384	0.999108	FALSE
ENSECAG00000023233	BMP15	bone morphotic protein 15	330.074	-0.34739	1.08861	-0.319113	0.749641	0.999108	FALSE
ENSECAG00000011752	ATG14	autophagy related 14	1410.28	-0.347083	0.532609	-0.651665	0.514617	0.999108	FALSE
ENSECAG00000015150	EIF3L	eukaryotic translation initiation factor 3 subunit L	624.419	-0.34583	0.778828	-0.444039	0.657015	0.999108	FALSE
ENSECAG00000030878			395.351	-0.344719	0.909074	-0.379198	0.70454	0.999108	FALSE
ENSECAG00000042012			2341.78	-0.342736	0.625462	-0.547973	0.58371	0.999108	FALSE
ENSECAG00000023917	ADCK2	aarF domain containing kinase 2	671.887	-0.341893	0.901078	-0.379427	0.704371	0.999108	FALSE
ENSECAG00000017504	QKI	QKI, KH domain containing RNA binding	875.015	-0.339466	0.761518	-0.445776	0.655759	0.999108	FALSE
ENSECAG00000039147	WDR82	WD repeat domain 82	132.112	-0.339162	1.6425	-0.206491	0.836407	0.999108	FALSE
ENSECAG00000041964	STMP1	short transmembrane mitochondrial protein 1	48.76	-0.338354	1.75518	-0.192775	0.847135	0.999108	FALSE
ENSECAG00000018492	WDR48	WD repeat domain 48	222.706	-0.336478	1.38916	-0.242216	0.808613	0.999108	FALSE
ENSECAG00000023203	TYMS	thymidylate synthetase	909.47	-0.335481	0.643245	-0.521545	0.601987	0.999108	FALSE
ENSECAG00000020524	MRNIP	MRN complex interacting protein	176.539	-0.334418	1.57613	-0.212176	0.831969	0.999108	FALSE
ENSECAG00000021088	GDF9	growth differentiation factor 9	1447.94	-0.332903	0.543643	-0.612356	0.540303	0.999108	FALSE
ENSECAG00000005577	GPR39	G protein-coupled receptor 39	92.7397	-0.332578	1.62436	-0.204743	0.837773	0.999108	FALSE
ENSECAG00000000356	PALS1	protein associated with LIN7 1, MAGUK p55 family member	246.293	-0.332478	1.25297	-0.265351	0.790739	0.999108	FALSE
ENSECAG00000012485	CDS2	CDP-diacylglycerol synthase 2	706.911	-0.332421	0.65939	-0.504134	0.614168	0.999108	FALSE
ENSECAG00000000708	SARNP	SAP domain containing ribonucleoprotein	5641.06	-0.332043	0.424407	-0.782369	0.433998	0.999108	FALSE
ENSECAG00000009847	MTA2	metastasis associated 1 family member 2	269.182	-0.331894	0.910283	-0.364605	0.715406	0.999108	FALSE
ENSECAG00000016827	ABCF3	ATP binding cassette subfamily F member 3	126.033	-0.331334	1.63013	-0.203256	0.838935	0.999108	FALSE
ENSECAG00000001853	CCNH	cyclin H	454.224	-0.331147	1.30985	-0.252812	0.800414	0.999108	FALSE
ENSECAG00000029802			116.209	-0.328686	1.81478	-0.181116	0.856277	0.999108	FALSE
ENSECAG00000041537	FXYD6	FXYD domain containing ion transport regulator 6	178.806	-0.32509	1.12186	-0.289779	0.771985	0.999108	FALSE
ENSECAG00000016769	TAF4B	TATA-box binding protein associated factor 4b	317.716	-0.324877	1.12619	-0.288474	0.772984	0.999108	FALSE
ENSECAG00000008516	TBP	TATA-box binding protein	194.08	-0.324543	1.51549	-0.21415	0.83043	0.999108	FALSE
ENSECAG00000008968	HSPD1	heat shock protein family D (Hsp60) member 1	349.011	-0.324438	1.14061	-0.284443	0.776071	0.999108	FALSE
ENSECAG00000022532	GSE1	Gse1 coiled-coil protein	2003.66	-0.324359	0.501736	-0.646473	0.517973	0.999108	FALSE
ENSECAG00000009146	MRPS16	mitochondrial ribosomal protein S16	456.756	-0.32367	0.932003	-0.347284	0.728378	0.999108	FALSE
ENSECAG00000000116	SUPT20H	SPT20 homolog, SAGA complex component	2164.65	-0.323654	0.65879	-0.491285	0.623225	0.999108	FALSE
ENSECAG00000008787	CCNB3	cyclin B3	369.937	-0.323282	1.26702	-0.25515	0.798607	0.999108	FALSE
ENSECAG00000019631	MCM2	minichromosome maintenance complex component 2	493.473	-0.321271	0.874606	-0.367332	0.713371	0.999108	FALSE
ENSECAG00000012858	RASL11A	RAS like family 11 member A	3285.12	-0.320591	0.604032	-0.530752	0.595591	0.999108	FALSE
ENSECAG00000019350	FAM76A	family with sequence similarity 76 member A	280.141	-0.319607	1.41755	-0.225464	0.821618	0.999108	FALSE
ENSECAG00000009395	POU2F1	POU class 2 homeobox 1	406.366	-0.319482	1.04697	-0.30515	0.760252	0.999108	FALSE
ENSECAG00000008731			52147.1	-0.31851	0.400092	-0.796092	0.425979	0.999108	FALSE
ENSECAG00000015953	PPP1CB	protein phosphatase 1 catalytic subunit beta	6651.27	-0.317405	0.447216	-0.709735	0.477869	0.999108	FALSE
ENSECAG00000018242	HNRNPAB	heteroous nuclear ribonucleoprotein A/B	83.3986	-0.31663	1.91963	-0.164943	0.868989	0.999108	FALSE
ENSECAG00000017496	TM7SF3	transmembrane 7 superfamily member 3	252.009	-0.316435	0.845076	-0.374445	0.708073	0.999108	FALSE
ENSECAG00000013543	TSPAN15	tetraspanin 15	147.148	-0.316129	1.39265	-0.226997	0.820426	0.999108	FALSE
ENSECAG00000011380	TACC3	transforming acidic coiled-coil containing protein 3	689.516	-0.316002	0.640879	-0.493077	0.621958	0.999108	FALSE
ENSECAG00000016088	CCDC43	coiled-coil domain containing 43	990.281	-0.314848	0.676718	-0.465257	0.641748	0.999108	FALSE
ENSECAG00000008712	FBXW8	F-box and WD repeat domain containing 8	143.985	-0.314187	1.27414	-0.246588	0.805227	0.999108	FALSE
ENSECAG00000012818	TUBB3	tubulin beta 3 class III	890.295	-0.313518	0.899938	-0.348377	0.727557	0.999108	FALSE
ENSECAG00000024197	DARS1	aspartyl-tRNA synthetase 1	10.5343	-0.312341	3.01751	-0.103509	0.917559	0.999108	FALSE
ENSECAG00000012952	KMT5B	lysine methyltransferase 5B	355.859	-0.312128	1.27458	-0.244887	0.806544	0.999108	FALSE
ENSECAG00000013186	WWC3	WWC family member 3	306.085	-0.30948	1.07843	-0.286971	0.774134	0.999108	FALSE
ENSECAG00000023629	GJC1	gap junction protein gamma 1	1077.67	-0.30884	0.559921	-0.551578	0.581238	0.999108	FALSE
ENSECAG00000013706	SMAD6	SMAD family member 6	146.243	-0.30826	1.4891	-0.207011	0.836001	0.999108	FALSE
ENSECAG00000009502	AASDH	aminoadipate-semialdehyde dehydrogenase	826.514	-0.307065	1.02228	-0.300372	0.763893	0.999108	FALSE
ENSECAG00000009327	EP300	E1A binding protein p300	735.571	-0.307046	0.85165	-0.360531	0.71845	0.999108	FALSE
ENSECAG00000022396	SMC3	structural maintenance of chromosomes 3	939.607	-0.306565	0.776918	-0.394591	0.693145	0.999108	FALSE
ENSECAG00000024122	C20H6orf89	chromosome 20 C6orf89 homolog	144.399	-0.306132	1.66813	-0.183518	0.854392	0.999108	FALSE
ENSECAG00000037742			318.497	-0.304157	0.797246	-0.381509	0.702825	0.999108	FALSE
ENSECAG00000007745	RBM28	RNA binding motif protein 28	155.448	-0.303742	1.5912	-0.190888	0.848613	0.999108	FALSE
ENSECAG00000020488	TLN2	talin 2	317.627	-0.303211	1.40419	-0.215933	0.82904	0.999108	FALSE
ENSECAG00000025080	RPL19	ribosomal protein L19	106.745	-0.302328	1.79647	-0.16829	0.866355	0.999108	FALSE
ENSECAG00000001057	MTRFR	mitochondrial translation release factor in rescue	144.637	-0.30197	1.5574	-0.193894	0.846259	0.999108	FALSE
ENSECAG00000020724	TPR	translocated promoter region, nuclear basket protein	222.935	-0.300756	1.34574	-0.223488	0.823156	0.999108	FALSE
ENSECAG00000015732	IL37	interleukin 37	416.633	-0.300018	1.1355	-0.264216	0.791614	0.999108	FALSE
ENSECAG00000011567	UIMC1	ubiquitin interaction motif containing 1	558.47	-0.298734	0.892983	-0.334534	0.737976	0.999108	FALSE
ENSECAG00000022784	RBBP4	RB binding protein 4, chromatin remodeling factor	1002.58	-0.298036	0.62853	-0.474179	0.635372	0.999108	FALSE
ENSECAG00000020645	ASPM	assembly factor for spindle microtubules	2599.8	-0.297453	0.603983	-0.492485	0.622376	0.999108	FALSE
ENSECAG00000011403	ALDH3A2	aldehyde dehydrogenase 3 family member A2	249.168	-0.296778	1.43981	-0.206122	0.836695	0.999108	FALSE
ENSECAG00000011755	GLYATL3	glycine-N-acyltransferase like 3	227.449	-0.293434	1.15639	-0.253751	0.799688	0.999108	FALSE
ENSECAG00000008511	HSP90AB1	heat shock protein 90 alpha family class B member 1	1802.47	-0.287323	0.590717	-0.486397	0.626686	0.999108	FALSE
ENSECAG00000035135			5395.51	-0.286675	0.53767	-0.53318	0.593909	0.999108	FALSE
ENSECAG00000036054	GFER	growth factor, augmenter of liver reration	818.841	-0.285327	0.683824	-0.417252	0.676494	0.999108	FALSE
ENSECAG00000010986	MTDH	metadherin	3326.52	-0.284608	0.446072	-0.638031	0.523453	0.999108	FALSE
ENSECAG00000008104	DYNLL1	dynein light chain LC8-type 1	243.333	-0.282628	0.996448	-0.283636	0.77669	0.999108	FALSE
ENSECAG00000015920	PHTF2	putative homeodomain transcription factor 2	386.069	-0.281819	1.40916	-0.199991	0.841488	0.999108	FALSE
ENSECAG00000020699			1400.39	-0.281151	0.608635	-0.461938	0.644126	0.999108	FALSE
ENSECAG00000010047	BUB3	BUB3 mitotic checkpoint protein	1040.13	-0.280904	0.569723	-0.493053	0.621975	0.999108	FALSE
ENSECAG00000022684	DDX42	DEAD-box helicase 42	525.809	-0.280583	1.01905	-0.275337	0.783057	0.999108	FALSE
ENSECAG00000005234			426.586	-0.280205	0.986905	-0.283923	0.776469	0.999108	FALSE
ENSECAG00000016501	CEP41	centrosomal protein 41	56.9447	-0.280139	1.78366	-0.157059	0.875199	0.999108	FALSE
ENSECAG00000025104	HNRNPK	heteroous nuclear ribonucleoprotein K	954.936	-0.280095	0.613841	-0.456299	0.648175	0.999108	FALSE
ENSECAG00000020163	CFAP44	cilia and flagella associated protein 44	353.671	-0.278348	1.00651	-0.276549	0.782127	0.999108	FALSE
ENSECAG00000013193	UHRF1	ubiquitin like with PHD and ring finger domains 1	1420.03	-0.277868	0.523594	-0.530694	0.595631	0.999108	FALSE
ENSECAG00000007532			985.489	-0.276572	0.842074	-0.328442	0.742578	0.999108	FALSE
ENSECAG00000001911	TAX1BP1	Tax1 binding protein 1	3173.41	-0.276151	0.501438	-0.550718	0.581827	0.999108	FALSE
ENSECAG00000010476	L3MBTL2	L3MBTL histone methyl-lysine binding protein 2	489.94	-0.27531	0.766682	-0.359093	0.719525	0.999108	FALSE
ENSECAG00000010081	CDC5L	cell division cycle 5 like	4119.02	-0.274573	0.441802	-0.621485	0.534281	0.999108	FALSE
ENSECAG00000020614	DCBLD2	discoidin, CUB and LCCL domain containing 2	305.575	-0.274124	1.05778	-0.259149	0.79552	0.999108	FALSE
ENSECAG00000028173			1317.28	-0.273573	0.740487	-0.36945	0.711792	0.999108	FALSE
ENSECAG00000024698	INPP1	inositol polyphosphate-1-phosphatase	317.774	-0.272076	1.11532	-0.243945	0.807273	0.999108	FALSE
ENSECAG00000036991	CMTM7	CKLF like MARVEL transmembrane domain containing 7	205.021	-0.271485	1.00516	-0.27009	0.787091	0.999108	FALSE
ENSECAG00000016313	PTPN4	protein tyrosine phosphatase non-receptor type 4	712.06	-0.271409	1.05254	-0.257861	0.796514	0.999108	FALSE
ENSECAG00000012564	BTG4	BTG anti-proliferation factor 4	5754.97	-0.270646	0.462937	-0.584627	0.558798	0.999108	FALSE
ENSECAG00000028645	SELENOT	selenoprotein T	130.5	-0.270303	1.48865	-0.181576	0.855915	0.999108	FALSE
ENSECAG00000013115	BRD9	bromodomain containing 9	359.356	-0.267536	1.2314	-0.217262	0.828004	0.999108	FALSE
ENSECAG00000018495	SSB	small RNA binding exonuclease protection factor La	4343.22	-0.26752	0.519243	-0.515211	0.606406	0.999108	FALSE
ENSECAG00000009706	AKAP13	A-kinase anchoring protein 13	332.6	-0.267331	1.45967	-0.183145	0.854684	0.999108	FALSE
ENSECAG00000013171	RNF216	ring finger protein 216	523.416	-0.266677	1.13946	-0.234038	0.814955	0.999108	FALSE
ENSECAG00000014261	TCOF1	treacle ribosome biosis factor 1	1117.06	-0.26667	0.771061	-0.345848	0.729457	0.999108	FALSE
ENSECAG00000024693	SUMO1	small ubiquitin like modifier 1	2920.57	-0.266463	0.460777	-0.578291	0.563068	0.999108	FALSE
ENSECAG00000017195	NPRL3	NPR3 like, GATOR1 complex subunit	769.125	-0.266434	0.943941	-0.282257	0.777746	0.999108	FALSE
ENSECAG00000024694	KIF14	kinesin family member 14	1403.67	-0.266235	0.652119	-0.408262	0.683081	0.999108	FALSE
ENSECAG00000009748	TDRD1	tudor domain containing 1	180.979	-0.264597	1.40593	-0.188201	0.850719	0.999108	FALSE
ENSECAG00000014822	CMTR1	cap methyltransferase 1	287.566	-0.26422	1.4243	-0.185508	0.85283	0.999108	FALSE
ENSECAG00000013188	CDCA2	cell division cycle associated 2	521.247	-0.261731	0.812931	-0.321959	0.747484	0.999108	FALSE
ENSECAG00000023524	DKC1	dyskerin pseudouridine synthase 1	1461.93	-0.261675	0.63243	-0.413762	0.679049	0.999108	FALSE
ENSECAG00000014059	ECT2	epithelial cell transforming 2	1615.46	-0.261185	0.693609	-0.37656	0.706501	0.999108	FALSE
ENSECAG00000022405	NOTCH1	notch receptor 1	1122.07	-0.259321	0.724807	-0.35778	0.720508	0.999108	FALSE
ENSECAG00000008396	CALM2	calmodulin 2	20900.1	-0.259051	0.510841	-0.507108	0.612079	0.999108	FALSE
ENSECAG00000019849	ARCN1	archain 1	600.351	-0.25881	1.08902	-0.237655	0.812149	0.999108	FALSE
ENSECAG00000011899	PNN	pinin, desmosome associated protein	687.852	-0.257795	1.06882	-0.241196	0.809403	0.999108	FALSE
ENSECAG00000020881	CTSC	cathepsin C	198.341	-0.257278	1.04331	-0.246597	0.80522	0.999108	FALSE
ENSECAG00000026874	HSPE1	heat shock protein family E (Hsp10) member 1	465.851	-0.25593	0.921881	-0.277617	0.781306	0.999108	FALSE
ENSECAG00000012624	POLD3	DNA polymerase delta 3, accessory subunit	772.612	-0.255615	0.594648	-0.42986	0.667297	0.999108	FALSE
ENSECAG00000021777	ACTN4	actinin alpha 4	433.076	-0.254458	0.841672	-0.302324	0.762405	0.999108	FALSE
ENSECAG00000020698	MELK	maternal embryonic leucine zipper kinase	351.719	-0.252767	1.03975	-0.243103	0.807926	0.999108	FALSE
ENSECAG00000022931	TCF7L1	transcription factor 7 like 1	378.837	-0.251476	0.947196	-0.265496	0.790628	0.999108	FALSE
ENSECAG00000014742	GPAM	glycerol-3-phosphate acyltransferase, mitochondrial	414.464	-0.250859	0.918971	-0.272978	0.78487	0.999108	FALSE
ENSECAG00000011696	MYCBP2	MYC binding protein 2	491.961	-0.248846	1.0838	-0.229606	0.818398	0.999108	FALSE
ENSECAG00000013136	ADD1	adducin 1	257.464	-0.248841	1.40581	-0.177009	0.859501	0.999108	FALSE
ENSECAG00000003428			1806.82	-0.247254	0.533687	-0.463294	0.643154	0.999108	FALSE
ENSECAG00000017044	RALA	RAS like proto-onco A	855.534	-0.247077	0.819471	-0.301508	0.763027	0.999108	FALSE
ENSECAG00000008525	ZNF512B	zinc finger protein 512B	239.302	-0.246416	1.39421	-0.176742	0.859711	0.999108	FALSE
ENSECAG00000010659	LSM14B	LSM family member 14B	140.599	-0.246375	1.40083	-0.175877	0.86039	0.999108	FALSE
ENSECAG00000021148	RNPC3	RNA binding region (RNP1, RRM) containing 3	1040.81	-0.246348	0.54166	-0.454801	0.649252	0.999108	FALSE
ENSECAG00000007410	EML4	EMAP like 4	1469.73	-0.246341	0.672703	-0.366196	0.714219	0.999108	FALSE
ENSECAG00000012899	ESCO2	establishment of sister chromatid cohesion N-acetyltransferase 2	2198.74	-0.242713	0.535878	-0.452925	0.650603	0.999108	FALSE
ENSECAG00000009478	RHOT1	ras homolog family member T1	1270.7	-0.242294	0.80262	-0.301879	0.762744	0.999108	FALSE
ENSECAG00000007254	IZUMO1R	IZUMO1 receptor, JUNO	61.2695	-0.241072	1.82146	-0.132351	0.894707	0.999108	FALSE
ENSECAG00000013216	NMT1	N-myristoyltransferase 1	261.541	-0.240161	1.14481	-0.209783	0.833837	0.999108	FALSE
ENSECAG00000021652	RAB3IP	RAB3A interacting protein	397.316	-0.239932	1.38797	-0.172865	0.862757	0.999108	FALSE
ENSECAG00000015242			128.543	-0.239865	1.61578	-0.148452	0.881986	0.999108	FALSE
ENSECAG00000019669	KDM1A	lysine demethylase 1A	118.35	-0.239798	1.70561	-0.140594	0.888191	0.999108	FALSE
ENSECAG00000037356			62.2703	-0.237356	1.97462	-0.120203		1	FALSE
ENSECAG00000014191	MED14	mediator complex subunit 14	236.387	-0.236164	1.14489	-0.206276	0.836575	0.999108	FALSE
ENSECAG00000006613	FBXO45	F-box protein 45	215.811	-0.235454	1.30132	-0.180935	0.856419	0.999108	FALSE
ENSECAG00000016346	LEPROT	leptin receptor overlapping transcript	414.027	-0.23539	1.06176	-0.221698	0.824549	0.999108	FALSE
ENSECAG00000000608	CAPRIN2	caprin family member 2	941.03	-0.233486	1.00998	-0.231178	0.817177	0.999108	FALSE
ENSECAG00000012731	YJU2B	YJU2 splicing factor homolog B	63.1256	-0.233153	2.10384	-0.110822		1	FALSE
ENSECAG00000011754	RPIA	ribose 5-phosphate isomerase A	5667.38	-0.2326	0.439029	-0.529807	0.596246	0.999108	FALSE
ENSECAG00000011836	TTC27	tetratricopeptide repeat domain 27	2865.29	-0.230806	0.524977	-0.439649	0.660191	0.999108	FALSE
ENSECAG00000020408	PSMD7	proteasome 26S subunit, non-ATPase 7	847.988	-0.229965	0.637992	-0.360451	0.71851	0.999108	FALSE
ENSECAG00000013321	NAPG	NSF attachment protein gamma	244.465	-0.228223	1.57693	-0.144726	0.884928	0.999108	FALSE
ENSECAG00000000046	FAM13C	family with sequence similarity 13 member C	1122.66	-0.225809	0.640755	-0.352411	0.72453	0.999108	FALSE
ENSECAG00000024078	MKLN1	muskelin 1	123.681	-0.225493	1.71633	-0.131381	0.895474	0.999108	FALSE
ENSECAG00000023455	NUMA1	nuclear mitotic apparatus protein 1	217.115	-0.224837	1.15814	-0.194137	0.846069	0.999108	FALSE
ENSECAG00000010697	ZP4	zona pellucida glycoprotein 4	891.794	-0.223557	0.826358	-0.270532	0.786751	0.999108	FALSE
ENSECAG00000005387	UTP3	UTP3 small subunit processome component	441.27	-0.223136	1.22651	-0.181927	0.85564	0.999108	FALSE
ENSECAG00000007657	SFSWAP	splicing factor SWAP	598.91	-0.222886	1.30551	-0.170726	0.864439	0.999108	FALSE
ENSECAG00000023355	GTSE1	G2 and S-phase expressed 1	891.803	-0.22017	0.703093	-0.313144	0.754171	0.999108	FALSE
ENSECAG00000011947	PRKAB1	protein kinase AMP-activated non-catalytic subunit beta 1	273.246	-0.21947	1.11399	-0.197013	0.843817	0.999108	FALSE
ENSECAG00000006331	CLOCK	clock circadian regulator	1882.64	-0.219294	0.605394	-0.362234	0.717177	0.999108	FALSE
ENSECAG00000026909	DNMT1	DNA methyltransferase 1	3069.27	-0.217126	0.559014	-0.388409	0.697714	0.999108	FALSE
ENSECAG00000011505	CHD9	chromodomain helicase DNA binding protein 9	403.957	-0.216526	1.08634	-0.199318	0.842014	0.999108	FALSE
ENSECAG00000013348	LIMCH1	LIM and calponin homology domains 1	6034.92	-0.21587	0.454765	-0.474685	0.635011	0.999108	FALSE
ENSECAG00000012655	CYSTM1	cysteine rich transmembrane module containing 1	94.3543	-0.214927	1.55024	-0.138641	0.889734	0.999108	FALSE
ENSECAG00000024644	KIF3A	kinesin family member 3A	857.504	-0.214918	0.967654	-0.222102	0.824234	0.999108	FALSE
ENSECAG00000009855	ALS2	alsin Rho guanine nucleotide exchange factor ALS2	361.931	-0.214784	0.758398	-0.283207	0.777018	0.999108	FALSE
ENSECAG00000008702			39.2401	-0.214592	1.90614	-0.112579	0.910364	0.999108	FALSE
ENSECAG00000017991	ARID1A	AT-rich interaction domain 1A	148.856	-0.213677	1.21952	-0.175214	0.860911	0.999108	FALSE
ENSECAG00000019115	IL13RA1	interleukin 13 receptor subunit alpha 1	194.243	-0.213529	1.32897	-0.160673	0.872351	0.999108	FALSE
ENSECAG00000040282			25.2639	-0.212505	2.12414	-0.100043	0.920311	0.999108	FALSE
ENSECAG00000024766	CREBBP	CREB binding protein	1081.28	-0.212241	0.618093	-0.34338	0.731312	0.999108	FALSE
ENSECAG00000013263	GPATCH2	G-patch domain containing 2	298.064	-0.212131	1.55294	-0.136599	0.891347	0.999108	FALSE
ENSECAG00000024907	ABCF1	ATP binding cassette subfamily F member 1	650.353	-0.21142	0.868599	-0.243403	0.807693	0.999108	FALSE
ENSECAG00000023413	BBX	BBX high mobility group box domain containing	2363.49	-0.21128	0.53573	-0.394378	0.693302	0.999108	FALSE
ENSECAG00000024737	SF3B4	splicing factor 3b subunit 4	270.03	-0.211248	1.17517	-0.17976	0.857341	0.999108	FALSE
ENSECAG00000019687			1062.16	-0.209316	1.01142	-0.206952	0.836048	0.999108	FALSE
ENSECAG00000040547			3420.94	-0.207191	0.483385	-0.428625	0.668196	0.999108	FALSE
ENSECAG00000018203	CIB1	calcium and integrin binding 1	270.001	-0.206159	1.05031	-0.196284	0.844388	0.999108	FALSE
ENSECAG00000013824	POC5	POC5 centriolar protein	4647.32	-0.20593	0.453175	-0.454415	0.64953	0.999108	FALSE
ENSECAG00000033344	PIK3R3	phosphoinositide-3-kinase regulatory subunit 3	251.191	-0.205916	1.61239	-0.127709	0.89838	0.999108	FALSE
ENSECAG00000005685	RDH10	retinol dehydrogenase 10	755.456	-0.203049	0.82021	-0.247558	0.804477	0.999108	FALSE
ENSECAG00000024809	C1H1orf131	chromosome 1 C1orf131 homolog	1140.87	-0.199977	0.699477	-0.285896	0.774958	0.999108	FALSE
ENSECAG00000020403	CSRNP2	cysteine and serine rich nuclear protein 2	21.9635	-0.199582	2.09064	-0.0954645	0.923946	0.999108	FALSE
ENSECAG00000001042	PHF1	PHD finger protein 1	21.3278	-0.199388	2.29075	-0.0870405	0.930639	0.999108	FALSE
ENSECAG00000008911	PRDM2	PR/SET domain 2	1150.11	-0.199226	0.834388	-0.238769	0.811285	0.999108	FALSE
ENSECAG00000022215	CRNKL1	crooked neck pre-mRNA splicing factor 1	408.499	-0.198506	0.913228	-0.217368	0.827922	0.999108	FALSE
ENSECAG00000017473	APPL1	adaptor protein, phosphotyrosine interacting with PH domain and leucine zipper 1	1379.23	-0.198444	0.633294	-0.313352	0.754013	0.999108	FALSE
ENSECAG00000007602	LTV1	LTV1 ribosome biogenesis factor	369.29	-0.197743	1.11723	-0.176995	0.859513	0.999108	FALSE
ENSECAG00000020522	PRIMPOL	primase and DNA directed polymerase	231.742	-0.197454	1.65414	-0.11937	0.904982	0.999108	FALSE
ENSECAG00000018072			307.548	-0.197179	0.943415	-0.209006	0.834443	0.999108	FALSE
ENSECAG00000008168	EXOC5	exocyst complex component 5	621.084	-0.19582	0.906985	-0.215902	0.829064	0.999108	FALSE
ENSECAG00000021452	BUB1B	BUB1 mitotic checkpoint serine/threonine kinase B	373.751	-0.194847	1.072	-0.18176	0.855771	0.999108	FALSE
ENSECAG00000002847	KNOP1	lysine rich nucleolar protein 1	1391.1	-0.19465	0.71194	-0.273407	0.78454	0.999108	FALSE
ENSECAG00000016613	PHLDB2	pleckstrin homology like domain family B member 2	2226.7	-0.193062	0.563619	-0.34254	0.731945	0.999108	FALSE
ENSECAG00000007993	PIAS1	protein inhibitor of activated STAT 1	2660.34	-0.192238	0.496703	-0.387029	0.698735	0.999108	FALSE
ENSECAG00000011670	RPL13	ribosomal protein L13	880.112	-0.190272	0.647182	-0.294001	0.768757	0.999108	FALSE
ENSECAG00000000683			47.1038	-0.189039	1.59677	-0.118388	0.90576	0.999108	FALSE
ENSECAG00000023010	USP45	ubiquitin specific peptidase 45	718.372	-0.187576	0.899607	-0.208509	0.834832	0.999108	FALSE
ENSECAG00000017534	HPRT1	hypoxanthine phosphoribosyltransferase 1	843.372	-0.187247	0.767104	-0.244096	0.807156	0.999108	FALSE
ENSECAG00000015319	NUP37	nucleoporin 37	293.684	-0.18676	1.23623	-0.151072	0.879919	0.999108	FALSE
ENSECAG00000009430	C13H16orf72	chromosome 13 C16orf72 homolog	284.92	-0.186477	1.36059	-0.137056	0.890986	0.999108	FALSE
ENSECAG00000000423	USP16	ubiquitin specific peptidase 16	830.972	-0.186249	0.790061	-0.23574	0.813634	0.999108	FALSE
ENSECAG00000043001	GPBP1L1	GC-rich promoter binding protein 1 like 1	400.938	-0.185754	1.09105	-0.170254	0.864811	0.999108	FALSE
ENSECAG00000012815	TNPO3	transportin 3	408.387	-0.185092	0.993629	-0.186278	0.852227	0.999108	FALSE
ENSECAG00000009520			14200.2	-0.18509	0.384776	-0.481035	0.630492	0.999108	FALSE
ENSECAG00000011396	TOX2	TOX high mobility group box family member 2	874.278	-0.1842	0.874555	-0.210622	0.833183	0.999108	FALSE
ENSECAG00000000162	TRIP12	thyroid hormone receptor interactor 12	492.596	-0.184081	1.39748	-0.131724	0.895203	0.999108	FALSE
ENSECAG00000012515	MRPL18	mitochondrial ribosomal protein L18	106.982	-0.183388	1.56087	-0.117491	0.906471	0.999108	FALSE
ENSECAG00000014475	STK39	serine/threonine kinase 39	173.554	-0.182294	1.54729	-0.117815	0.906214	0.999108	FALSE
ENSECAG00000020082	KCNN2	potassium calcium-activated channel subfamily N member 2	1273.88	-0.182007	0.722731	-0.251833	0.801171	0.999108	FALSE
ENSECAG00000006101	ZBTB39	zinc finger and BTB domain containing 39	93.6002	-0.181579	1.64241	-0.110556	0.911968	0.999108	FALSE
ENSECAG00000022979	MPG	N-methylpurine DNA glycosylase	180.861	-0.179488	1.41023	-0.127276	0.898722	0.999108	FALSE
ENSECAG00000000220	STK35	serine/threonine kinase 35	295.29	-0.178327	1.31033	-0.136093	0.891748	0.999108	FALSE
ENSECAG00000008974	FOXP1	forkhead box P1	303.67	-0.178138	1.07345	-0.165948	0.868198	0.999108	FALSE
ENSECAG00000008827	NDC80	NDC80 kinetochore complex component	888.205	-0.177602	0.569672	-0.311763	0.755221	0.999108	FALSE
ENSECAG00000016134	RAB11FIP1	RAB11 family interacting protein 1	272.061	-0.177482	1.73166	-0.102493	0.918366	0.999108	FALSE
ENSECAG00000015471	IFT81	intraflagellar transport 81	160.357	-0.177215	1.58245	-0.111988		1	FALSE
ENSECAG00000000595	SLC30A9	solute carrier family 30 member 9	242.09	-0.176872	1.31938	-0.134057	0.893358	0.999108	FALSE
ENSECAG00000013509	LCOR	ligand dependent nuclear receptor corepressor	983.535	-0.176717	0.790687	-0.223498	0.823148	0.999108	FALSE
ENSECAG00000023715			350.213	-0.176688	1.10547	-0.159831	0.873014	0.999108	FALSE
ENSECAG00000023466	SLAIN2	SLAIN motif family member 2	1874.57	-0.176557	0.571931	-0.308702	0.757548	0.999108	FALSE
ENSECAG00000035031	UBB	ubiquitin B	1348.49	-0.175692	0.767514	-0.228911	0.818938	0.999108	FALSE
ENSECAG00000019173	FAM13A	family with sequence similarity 13 member A	259.017	-0.174274	1.30075	-0.13398	0.893419	0.999108	FALSE
ENSECAG00000020859	AGAP3	ArfGAP with GTPase domain, ankyrin repeat and PH domain 3	266.958	-0.172675	1.12661	-0.153269	0.878186	0.999108	FALSE
ENSECAG00000005422	NFRKB	nuclear factor related to kappaB binding protein	610.945	-0.172318	1.23159	-0.139915	0.888727	0.999108	FALSE
ENSECAG00000024362	PGAM5	PGAM family member 5, mitochondrial serine/threonine protein phosphatase	317.581	-0.17195	1.12976	-0.1522	0.879029	0.999108	FALSE
ENSECAG00000024461	SF3B2	splicing factor 3b subunit 2	1673.05	-0.17033	0.6107	-0.27891	0.780314	0.999108	FALSE
ENSECAG00000016632	PPIP5K2	diphosphoinositol pentakisphosphate kinase 2	540.313	-0.170304	0.921164	-0.184879	0.853324	0.999108	FALSE
ENSECAG00000016025	SNRNP27	small nuclear ribonucleoprotein U4/U6.U5 subunit 27	1452.27	-0.170082	0.59353	-0.28656	0.774449	0.999108	FALSE
ENSECAG00000009638	PALS2	protein associated with LIN7 2, MAGUK p55 family member	608.821	-0.169629	0.944167	-0.17966	0.85742	0.999108	FALSE
ENSECAG00000013265	VAPB	VAMP associated protein B and C	369.141	-0.167708	1.41551	-0.118479	0.905688	0.999108	FALSE
ENSECAG00000017082	PHF21A	PHD finger protein 21A	1319.38	-0.16754	0.57538	-0.291182	0.770912	0.999108	FALSE
ENSECAG00000021091	TRAF6	TNF receptor associated factor 6	343.942	-0.165532	1.57658	-0.104995	0.91638	0.999108	FALSE
ENSECAG00000008450	ATP2B1	ATPase plasma membrane Ca2+ transporting 1	1022.83	-0.16486	0.61453	-0.268269	0.788492	0.999108	FALSE
ENSECAG00000006136	NKAPL	NFKB activating protein like	169.974	-0.163582	1.42657	-0.114668	0.908709	0.999108	FALSE
ENSECAG00000024613	GLRX	glutaredoxin	196.587	-0.160967	1.18988	-0.13528	0.89239	0.999108	FALSE
ENSECAG00000013562	ZNF706	zinc finger protein 706	838.116	-0.159796	0.584654	-0.273317	0.784609	0.999108	FALSE
ENSECAG00000017118	TLE7	TLE family member 7	1110.08	-0.159625	0.62166	-0.256772	0.797355	0.999108	FALSE
ENSECAG00000021954	NAE1	NEDD8 activating enzyme E1 subunit 1	211.301	-0.15903	1.41779	-0.112167	0.910691	0.999108	FALSE
ENSECAG00000040996			520.765	-0.158767	0.864106	-0.183736	0.854221	0.999108	FALSE
ENSECAG00000013816	VPS45	vacuolar protein sorting 45 homolog	96.3745	-0.158574	1.54617	-0.102559	0.918313	0.999108	FALSE
ENSECAG00000023968	ICE1	interactor of little elongation complex ELL subunit 1	268.227	-0.158123	1.07561	-0.147007	0.883127	0.999108	FALSE
ENSECAG00000008513	TATDN3	TatD DNase domain containing 3	132.878	-0.157223	1.59393	-0.0986385	0.921425	0.999108	FALSE
ENSECAG00000010482	CCDC186	coiled-coil domain containing 186	833.29	-0.157058	0.600656	-0.261477	0.793724	0.999108	FALSE
ENSECAG00000020406	PPP1R12A	protein phosphatase 1 regulatory subunit 12A	1965.54	-0.156749	0.556325	-0.281758	0.778129	0.999108	FALSE
ENSECAG00000000007	TMEM70	transmembrane protein 70	2240.72	-0.156593	0.562715	-0.278281	0.780797	0.999108	FALSE
ENSECAG00000008013	NMB	neuromedin B	1048.53	-0.153892	0.594814	-0.258724	0.795848	0.999108	FALSE
ENSECAG00000010849	MDH1	malate dehydrogenase 1	156.933	-0.153026	1.54518	-0.0990342	0.921111	0.999108	FALSE
ENSECAG00000014704	LRRCC1	leucine rich repeat and coiled-coil centrosomal protein 1	843.737	-0.151381	0.645955	-0.234352	0.814711	0.999108	FALSE
ENSECAG00000018130	ZFAND6	zinc finger AN1-type containing 6	153.632	-0.151312	1.49844	-0.10098	0.919567	0.999108	FALSE
ENSECAG00000023743	MIX23	mitochondrial matrix import factor 23	284.236	-0.151149	1.14469	-0.132044	0.89495	0.999108	FALSE
ENSECAG00000018731	OGA	O-GlcNAcase	1475.14	-0.1508	0.843343	-0.178813	0.858085	0.999108	FALSE
ENSECAG00000010682	GNPTAB	N-acetylglucosamine-1-phosphate transferase subunits alpha and beta	538.313	-0.149689	0.855415	-0.17499	0.861087	0.999108	FALSE
ENSECAG00000019406	PDCD5	programmed cell death 5	458.919	-0.148307	1.13703	-0.130433	0.896223	0.999108	FALSE
ENSECAG00000032338	COX8A	cytochrome c oxidase subunit 8A	238.471	-0.147932	0.967164	-0.152954	0.878435	0.999108	FALSE
ENSECAG00000018424	EIF2S1	eukaryotic translation initiation factor 2 subunit alpha	69.5175	-0.147592	1.90188	-0.0776033	0.938144	0.999108	FALSE
ENSECAG00000018948	HSP90AA1	heat shock protein 90 alpha family class A member 1	3530.35	-0.146857	0.488289	-0.300758	0.763599	0.999108	FALSE
ENSECAG00000008941	UBXN4	UBX domain protein 4	2103.2	-0.146744	0.522405	-0.280901	0.778787	0.999108	FALSE
ENSECAG00000018443	ATAD5	ATPase family AAA domain containing 5	749.211	-0.145995	0.693907	-0.210395	0.833359	0.999108	FALSE
ENSECAG00000023585	SATB1	SATB homeobox 1	470.892	-0.145991	0.852901	-0.17117	0.86409	0.999108	FALSE
ENSECAG00000020652	ECHDC1	ethylmalonyl-CoA decarboxylase 1	281.967	-0.144293	1.5578	-0.092626	0.926201	0.999108	FALSE
ENSECAG00000026924	JKAMP	JNK1/MAPK8 associated membrane protein	324.89	-0.14317	1.56652	-0.0913938	0.92718	0.999108	FALSE
ENSECAG00000000689	PPP4R2	protein phosphatase 4 regulatory subunit 2	1358.92	-0.142338	0.684495	-0.207946	0.835271	0.999108	FALSE
ENSECAG00000012600	RTRAF	RNA transcription, translation and transport factor	207.58	-0.141948	1.30051	-0.109148	0.913085	0.999108	FALSE
ENSECAG00000015395	HERC5	HECT and RLD domain containing E3 ubiquitin protein ligase 5	418.441	-0.140801	1.25996	-0.11175	0.911021	0.999108	FALSE
ENSECAG00000023074	SLC25A14	solute carrier family 25 member 14	397.484	-0.140201	1.26735	-0.110625	0.911914	0.999108	FALSE
ENSECAG00000013476	PHF6	PHD finger protein 6	476.454	-0.139536	1.00599	-0.138705	0.889684	0.999108	FALSE
ENSECAG00000003869	ZC3H7A	zinc finger CCCH-type containing 7A	215.58	-0.13927	1.72904	-0.0805474	0.935802	0.999108	FALSE
ENSECAG00000037302	OAZ1	ornithine decarboxylase antizyme 1	151.837	-0.13885	1.23247	-0.112661	0.9103	0.999108	FALSE
ENSECAG00000010069	XRCC2	X-ray repair cross complementing 2	1545.08	-0.138289	0.710534	-0.194627	0.845685	0.999108	FALSE
ENSECAG00000024764	ARHGAP18	Rho GTPase activating protein 18	797.654	-0.135248	0.661852	-0.204348	0.838081	0.999108	FALSE
ENSECAG00000019019	SNX1	sorting nexin 1	391.079	-0.134423	1.26822	-0.105993	0.915588	0.999108	FALSE
ENSECAG00000014123	TXLNG	taxilin gamma	1103.72	-0.134088	0.695709	-0.192735	0.847166	0.999108	FALSE
ENSECAG00000020363	EEF1A1	eukaryotic translation elongation factor 1 alpha 1	837.658	-0.131994	0.780377	-0.169141	0.865685	0.999108	FALSE
ENSECAG00000023620	ZC3H6	zinc finger CCCH-type containing 6	1257.67	-0.131918	0.733407	-0.17987	0.857254	0.999108	FALSE
ENSECAG00000015380	EIF2B3	eukaryotic translation initiation factor 2B subunit gamma	739.465	-0.130901	0.94619	-0.138345	0.889968	0.999108	FALSE
ENSECAG00000024534	TERF2	telomeric repeat binding factor 2	391.872	-0.130534	0.982368	-0.132877	0.894291	0.999108	FALSE
ENSECAG00000003122	FRG1	FSHD region 1	415.668	-0.130429	1.11158	-0.117337	0.906593	0.999108	FALSE
ENSECAG00000013247	PER2	period circadian regulator 2	207.386	-0.130328	1.33933	-0.097308	0.922482	0.999108	FALSE
ENSECAG00000014898	LEO1	LEO1 homolog, Paf1/RNA polymerase II complex component	3702.35	-0.130265	0.457912	-0.284476	0.776045	0.999108	FALSE
ENSECAG00000009936	TCERG1	transcription elongation regulator 1	3710.13	-0.1289	0.635532	-0.202822	0.839274	0.999108	FALSE
ENSECAG00000023318	GNS	glucosamine (N-acetyl)-6-sulfatase	189.452	-0.125488	1.61418	-0.077741	0.938034	0.999108	FALSE
ENSECAG00000021345	POLR2K	RNA polymerase II, I and III subunit K	193.133	-0.125187	0.927455	-0.13498	0.892628	0.999108	FALSE
ENSECAG00000026889	PPFIA1	PTPRF interacting protein alpha 1	2089.19	-0.12193	0.567742	-0.214762	0.829953	0.999108	FALSE
ENSECAG00000004513	DOP1A	DOP1 leucine zipper like protein A	225.039	-0.121652	1.41044	-0.0862509	0.931267	0.999108	FALSE
ENSECAG00000023078	ORMDL3	ORMDL sphingolipid biosynthesis regulator 3	62.8982	-0.119326	1.74059	-0.0685549	0.945344	0.999108	FALSE
ENSECAG00000022204	PCMTD1	protein-L-isoaspartate (D-aspartate) O-methyltransferase domain containing 1	197.562	-0.115653	1.50842	-0.0766716	0.938885	0.999108	FALSE
ENSECAG00000007845	PSMD1	proteasome 26S subunit, non-ATPase 1	2212.1	-0.115349	0.584302	-0.197413	0.843504	0.999108	FALSE
ENSECAG00000016986	PPM1B	protein phosphatase, Mg2+/Mn2+ dependent 1B	85.437	-0.114008	1.79852	-0.0633901	0.949456	0.999108	FALSE
ENSECAG00000023961	AURKA	aurora kinase A	25757.2	-0.113323	0.426851	-0.265486	0.790635	0.999108	FALSE
ENSECAG00000023910	MON1A	MON1 homolog A, secretory trafficking associated	120.127	-0.113275	1.51783	-0.0746293	0.94051	0.999108	FALSE
ENSECAG00000017894	CKAP2	cytoskeleton associated protein 2	1586.85	-0.112589	0.735906	-0.152994	0.878403	0.999108	FALSE
ENSECAG00000002814	TOB1	transducer of ERBB2, 1	633.035	-0.111629	0.852312	-0.130972	0.895797	0.999108	FALSE
ENSECAG00000008439	HMGB1	high mobility group box 1	12710.2	-0.107402	0.447992	-0.239741	0.810531	0.999108	FALSE
ENSECAG00000018650	SMC2	structural maintenance of chromosomes 2	2093.31	-0.107177	0.639921	-0.167484	0.866989	0.999108	FALSE
ENSECAG00000019776	SMC1A	structural maintenance of chromosomes 1A	153.022	-0.106873	1.64349	-0.0650279	0.948152	0.999108	FALSE
ENSECAG00000030415			51.0363	-0.105587	1.49723	-0.0705215	0.943779	0.999108	FALSE
ENSECAG00000026981	SRRM1	serine and arginine repetitive matrix 1	4569.35	-0.104889	0.444517	-0.235962	0.813462	0.999108	FALSE
ENSECAG00000020717	HELQ	helicase, POLQ like	747.461	-0.104621	1.16269	-0.0899818	0.928302	0.999108	FALSE
ENSECAG00000006280	LPIN2	lipin 2	390.509	-0.103395	1.16555	-0.0887093	0.929313	0.999108	FALSE
ENSECAG00000018485	POLR2A	RNA polymerase II subunit A	398.602	-0.102557	0.894744	-0.114622	0.908745	0.999108	FALSE
ENSECAG00000008636	EYA1	EYA transcriptional coactivator and phosphatase 1	387.974	-0.101519	1.1578	-0.0876826	0.930129	0.999108	FALSE
ENSECAG00000000511	CFL2	cofilin 2	624.546	-0.0993889	0.901169	-0.110289	0.91218	0.999108	FALSE
ENSECAG00000009528	CDH3	cadherin 3	12134.9	-0.0981338	0.491771	-0.199552	0.841831	0.999108	FALSE
ENSECAG00000021380	RBMX	RNA binding motif protein X-linked	2035.37	-0.0981088	0.73195	-0.134038	0.893373	0.999108	FALSE
ENSECAG00000016291	CCAR1	cell division cycle and apoptosis regulator 1	2131.61	-0.0979952	0.503873	-0.194484	0.845797	0.999108	FALSE
ENSECAG00000022751	GRXCR1	glutaredoxin and cysteine rich domain containing 1	1240.66	-0.0970051	0.782163	-0.124022	0.901298	0.999108	FALSE
ENSECAG00000021208	RC3H1	ring finger and CCCH-type domains 1	827.822	-0.096412	0.735567	-0.131072	0.895719	0.999108	FALSE
ENSECAG00000006636	HENMT1	HEN methyltransferase 1	502.041	-0.0949122	0.920439	-0.103116	0.917871	0.999108	FALSE
ENSECAG00000007391	MAT2A	methionine adenosyltransferase 2A	3407.48	-0.0939033	0.526094	-0.178492	0.858337	0.999108	FALSE
ENSECAG00000021005	AKAP11	A-kinase anchoring protein 11	1654.42	-0.0932642	0.56643	-0.164653	0.869217	0.999108	FALSE
ENSECAG00000012023	SYF2	SYF2 pre-mRNA splicing factor	1134.61	-0.0931735	0.528941	-0.176151	0.860175	0.999108	FALSE
ENSECAG00000023445	NUDCD1	NudC domain containing 1	1430.48	-0.0929996	0.97321	-0.0955597	0.92387	0.999108	FALSE
ENSECAG00000021097	ACIN1	apoptotic chromatin condensation inducer 1	210.872	-0.0923344	1.30461	-0.0707753	0.943577	0.999108	FALSE
ENSECAG00000013641	HOOK1	hook microtubule tethering protein 1	157.081	-0.0921925	1.817	-0.0507389		1	FALSE
ENSECAG00000007274	PLCL1	phospholipase C like 1 (inactive)	352.72	-0.0916086	1.62577	-0.056348	0.955065	0.999108	FALSE
ENSECAG00000014188	ILDR1	immunoglobulin like domain containing receptor 1	1746.57	-0.0914614	0.557373	-0.164094	0.869657	0.999108	FALSE
ENSECAG00000004274	IQGAP2	IQ motif containing GTPase activating protein 2	904.195	-0.0908509	0.546956	-0.166103	0.868076	0.999108	FALSE
ENSECAG00000033359			428.417	-0.090134	0.964219	-0.0934787	0.925523	0.999108	FALSE
ENSECAG00000011778	C7H11orf58	chromosome 7 C11orf58 homolog	2478.51	-0.0894503	0.488221	-0.183217	0.854628	0.999108	FALSE
ENSECAG00000012452	ATG12	autophagy related 12	168.193	-0.0893986	1.01343	-0.0882142	0.929706	0.999108	FALSE
ENSECAG00000021751	ZFP14	ZFP14 zinc finger protein	166.675	-0.0883335	1.70819	-0.0517118	0.958758	0.999108	FALSE
ENSECAG00000016948	H3-3B	H3.3 histone B	636.007	-0.087988	0.661324	-0.133048	0.894155	0.999108	FALSE
ENSECAG00000038183			325.769	-0.0873024	1.28939	-0.0677081	0.946018	0.999108	FALSE
ENSECAG00000009721	SETD2	SET domain containing 2, histone lysine methyltransferase	611.518	-0.0868978	1.06269	-0.0817713	0.934829	0.999108	FALSE
ENSECAG00000016917	TES	testin LIM domain protein	307.244	-0.0868161	1.21823	-0.0712644	0.943187	0.999108	FALSE
ENSECAG00000026853	CEP152	centrosomal protein 152	1007.8	-0.0864202	0.77708	-0.111212	0.911449	0.999108	FALSE
ENSECAG00000009181	CLINT1	clathrin interactor 1	1304.4	-0.0838918	0.834215	-0.100564	0.919897	0.999108	FALSE
ENSECAG00000012800	NUP88	nucleoporin 88	1174.59	-0.0829971	0.726845	-0.114188	0.909089	0.999108	FALSE
ENSECAG00000006833	CRADD	CASP2 and RIPK1 domain containing adaptor with death domain	589.385	-0.0824972	0.698075	-0.118178	0.905926	0.999108	FALSE
ENSECAG00000011664	PRKAR2B	protein kinase cAMP-dependent type II regulatory subunit beta	187.011	-0.0820639	1.01506	-0.0808467	0.935564	0.999108	FALSE
ENSECAG00000024327	FBXL5	F-box and leucine rich repeat protein 5	368.185	-0.0816451	1.32529	-0.0616054	0.950877	0.999108	FALSE
ENSECAG00000012231	DEK	DEK proto-onco	9947.15	-0.0791443	0.434768	-0.182038	0.855553	0.999108	FALSE
ENSECAG00000018517	MCPH1	microcephalin 1	3634.54	-0.0771011	0.459355	-0.167846	0.866704	0.999108	FALSE
ENSECAG00000014615	STX2	syntaxin 2	798.788	-0.0759901	1.09542	-0.0693708	0.944694	0.999108	FALSE
ENSECAG00000019110	UBQLN1	ubiquilin 1	14961.6	-0.0756142	0.58801	-0.128593	0.897679	0.999108	FALSE
ENSECAG00000011391	TET3	tet methylcytosine dioxygenase 3	1026.91	-0.0753584	0.577642	-0.130459	0.896204	0.999108	FALSE
ENSECAG00000027772			213.75	-0.0751325	1.42383	-0.052768	0.957917	0.999108	FALSE
ENSECAG00000023232	ZNHIT3	zinc finger HIT-type containing 3	1052.34	-0.0729769	0.818019	-0.0892118	0.928914	0.999108	FALSE
ENSECAG00000023274	LAMA5	laminin subunit alpha 5	79.7138	-0.0726636	1.87634	-0.0387263	0.969109	0.999108	FALSE
ENSECAG00000019691	LTBP1	latent transforming growth factor beta binding protein 1	3230.22	-0.0725231	0.438463	-0.165403	0.868627	0.999108	FALSE
ENSECAG00000016835	STXBP6	syntaxin binding protein 6	320.168	-0.0718983	1.04	-0.0691327	0.944884	0.999108	FALSE
ENSECAG00000010198	PITPNB	phosphatidylinositol transfer protein beta	1128.68	-0.0692006	0.710827	-0.0973522	0.922447	0.999108	FALSE
ENSECAG00000040308	TMED7	transmembrane p24 trafficking protein 7	7.8598	-0.0654364	3.0768	-0.0212677	0.983032	0.999108	FALSE
ENSECAG00000018050			494.376	-0.0648321	1.04263	-0.0621813	0.950418	0.999108	FALSE
ENSECAG00000013295	NUFIP1	nuclear FMR1 interacting protein 1	1578.79	-0.0619628	0.578952	-0.107026	0.914768	0.999108	FALSE
ENSECAG00000028405			428.583	-0.0615397	1.2235	-0.0502982	0.959885	0.999108	FALSE
ENSECAG00000019646	AHI1	Abelson helper integration site 1	3661.87	-0.0599133	0.490391	-0.122174	0.902761	0.999108	FALSE
ENSECAG00000014441	ZNF330	zinc finger protein 330	367.718	-0.0595368	1.50618	-0.0395282	0.968469	0.999108	FALSE
ENSECAG00000023294	MYH15	myosin heavy chain 15	1339.85	-0.0584797	0.772647	-0.0756875	0.939668	0.999108	FALSE
ENSECAG00000016935	SENP5	SUMO specific peptidase 5	1122.06	-0.0577145	0.700455	-0.0823957	0.934332	0.999108	FALSE
ENSECAG00000019485	PPP4R4	protein phosphatase 4 regulatory subunit 4	150.369	-0.057014	1.59326	-0.0357844	0.971454	0.999108	FALSE
ENSECAG00000016773	NABP1	nucleic acid binding protein 1	318.056	-0.0568341	1.10404	-0.0514783	0.958944	0.999108	FALSE
ENSECAG00000009294	PARD6B	par-6 family cell polarity regulator beta	187.895	-0.0567428	1.68565	-0.0336622	0.973147	0.999108	FALSE
ENSECAG00000019630	DPY30	dpy-30 histone methyltransferase complex regulatory subunit	120.416	-0.0563866	1.46336	-0.0385322	0.969263	0.999108	FALSE
ENSECAG00000035897			360.226	-0.0558296	0.726796	-0.076816	0.93877	0.999108	FALSE
ENSECAG00000012967	PRKAA2	protein kinase AMP-activated catalytic subunit alpha 2	79.0379	-0.0553472	1.82951	-0.0302524	0.975866	0.999108	FALSE
ENSECAG00000040193	GOSR1	golgi SNAP receptor complex member 1	886.233	-0.0550252	0.664146	-0.082851	0.93397	0.999108	FALSE
ENSECAG00000041291			171.57	-0.0541133	1.16322	-0.0465203	0.962896	0.999108	FALSE
ENSECAG00000013813	PSMG4	proteasome assembly chaperone 4	280.04	-0.050908	1.64132	-0.0310164	0.975256	0.999108	FALSE
ENSECAG00000014482	TOR2A	torsin family 2 member A	223.576	-0.0494847	1.19053	-0.0415651	0.966845	0.999108	FALSE
ENSECAG00000009648	CLIP1	CAP-Gly domain containing linker protein 1	1718.22	-0.049296	0.653907	-0.0753868	0.939907	0.999108	FALSE
ENSECAG00000012872	SSX2IP	SSX family member 2 interacting protein	2427.45	-0.0492494	0.61882	-0.0795861	0.936566	0.999108	FALSE
ENSECAG00000033032			237.531	-0.0487714	0.936611	-0.0520722	0.958471	0.999108	FALSE
ENSECAG00000007942	LMNB1	lamin B1	24.3048	-0.04877	2.25287	-0.0216479	0.982729	0.999108	FALSE
ENSECAG00000014481	AGPAT1	1-acylglycerol-3-phosphate O-acyltransferase 1	223.982	-0.0483891	1.17436	-0.0412045	0.967133	0.999108	FALSE
ENSECAG00000022717	PDIA6	protein disulfide isomerase family A member 6	762.303	-0.0467174	1.1355	-0.0411427	0.967182	0.999108	FALSE
ENSECAG00000024240	MED4	mediator complex subunit 4	106.473	-0.0442496	1.76275	-0.0251026	0.979973	0.999108	FALSE
ENSECAG00000018683	PCF11	PCF11 cleavage and polyadenylation factor subunit	630.826	-0.0432253	1.2642	-0.0341918	0.972724	0.999108	FALSE
ENSECAG00000023565	ENY2	ENY2 transcription and export complex 2 subunit	874.455	-0.0429693	0.717677	-0.0598728	0.952257	0.999108	FALSE
ENSECAG00000034126			89.4041	-0.042511	1.23052	-0.0345473	0.972441	0.999108	FALSE
ENSECAG00000010404	HELZ	helicase with zinc finger	494.856	-0.0410034	1.17279	-0.0349622	0.97211	0.999108	FALSE
ENSECAG00000024558	CENPE	centromere protein E	2321.01	-0.040833	0.631054	-0.064706	0.948408	0.999108	FALSE
ENSECAG00000012399	SUB1	SUB1 regulator of transcription	221.222	-0.0406378	1.56612	-0.0259481	0.979299	0.999108	FALSE
ENSECAG00000010243	GALNT7	polypeptide N-acetylgalactosaminyltransferase 7	217.013	-0.040087	1.43222	-0.0279895	0.977671	0.999108	FALSE
ENSECAG00000012970	FAF2	Fas associated factor family member 2	560.598	-0.0398507	0.822938	-0.0484249	0.961378	0.999108	FALSE
ENSECAG00000006116	PPP1R35	protein phosphatase 1 regulatory subunit 35	1410.41	-0.0390442	0.782684	-0.049885	0.960214	0.999108	FALSE
ENSECAG00000021504	SPATA22	spermatosis associated 22	262.744	-0.0382568	1.26752	-0.0301825	0.975922	0.999108	FALSE
ENSECAG00000001667	DEPDC7	DEP domain containing 7	1055.76	-0.0380378	0.728532	-0.0522116	0.95836	0.999108	FALSE
ENSECAG00000014044	CDYL	chromodomain Y like	989.222	-0.0374278	0.716384	-0.0522454	0.958333	0.999108	FALSE
ENSECAG00000015172	SSH2	slingshot protein phosphatase 2	1105.52	-0.0369497	0.668988	-0.0552322	0.955953	0.999108	FALSE
ENSECAG00000015265	CCDC81	coiled-coil domain containing 81	134.578	-0.0367722	1.71382	-0.0214562	0.982882	0.999108	FALSE
ENSECAG00000021367	POPDC3	popeye domain containing 3	273.5	-0.0352621	1.39479	-0.0252813	0.979831	0.999108	FALSE
ENSECAG00000000725	ZMYND11	zinc finger MYND-type containing 11	2719.22	-0.0350918	0.529939	-0.0662186	0.947204	0.999108	FALSE
ENSECAG00000016694	THAP9	THAP domain containing 9	112.013	-0.0349409	1.85883	-0.0187973	0.985003	0.999108	FALSE
ENSECAG00000024501	FAM193A	family with sequence similarity 193 member A	948.13	-0.0344464	0.886892	-0.0388395	0.969018	0.999108	FALSE
ENSECAG00000023747	KYAT3	kynurenine aminotransferase 3	136.411	-0.0344115	1.73836	-0.0197954	0.984207	0.999108	FALSE
ENSECAG00000019097	TANK	TRAF family member associated NFKB activator	2827.57	-0.0331513	0.482742	-0.0686729	0.94525	0.999108	FALSE
ENSECAG00000023468	PDZD8	PDZ domain containing 8	108.623	-0.032514	1.89044	-0.0171992	0.986278	0.999108	FALSE
ENSECAG00000013751	TM9SF3	transmembrane 9 superfamily member 3	235.194	-0.0313643	1.32566	-0.0236593	0.981124	0.999108	FALSE
ENSECAG00000015548	ACACB	acetyl-CoA carboxylase beta	245.534	-0.03046	1.22914	-0.0247816	0.980229	0.999108	FALSE
ENSECAG00000001897			90.6712	-0.0302958	1.38183	-0.0219243	0.982508	0.999108	FALSE
ENSECAG00000024243	GNAS	GNAS complex locus	1099.3	-0.0290094	0.589748	-0.0491894	0.960768	0.999108	FALSE
ENSECAG00000011938	MANF	mesencephalic astrocyte derived neurotrophic factor	313.601	-0.027191	1.34747	-0.0201792	0.9839	0.999108	FALSE
ENSECAG00000020987	LCA5	lebercilin LCA5	230.32	-0.0271732	1.60502	-0.0169302	0.986492	0.999108	FALSE
ENSECAG00000011995	FTSJ3	FtsJ RNA 2'-O-methyltransferase 3	416.989	-0.026457	1.22963	-0.0215162	0.982834	0.999108	FALSE
ENSECAG00000012542	COQ2	coenzyme Q2, polyprenyltransferase	1191.97	-0.0254507	0.537178	-0.0473785	0.962212	0.999108	FALSE
ENSECAG00000010811	HHLA2	HERV-H LTR-associating 2	135.29	-0.0250484	1.75195	-0.0142975	0.988593	0.999108	FALSE
ENSECAG00000028359	SLC25A5	solute carrier family 25 member 5	284.994	-0.0244734	1.30433	-0.0187632	0.98503	0.999108	FALSE
ENSECAG00000026989	PDCD7	programmed cell death 7	790.658	-0.0240506	0.612137	-0.0392896	0.968659	0.999108	FALSE
ENSECAG00000018884	INTS14	integrator complex subunit 14	167.749	-0.0221139	1.41622	-0.0156148	0.987542	0.999108	FALSE
ENSECAG00000025150	LMO4	LIM domain only 4	3241.3	-0.0212494	0.431246	-0.0492744	0.960701	0.999108	FALSE
ENSECAG00000018839	PCIF1	phosphorylated CTD interacting factor 1	224.109	-0.0208182	1.45307	-0.014327	0.988569	0.999108	FALSE
ENSECAG00000032204			262.64	-0.0206715	1.10578	-0.018694	0.985085	0.999108	FALSE
ENSECAG00000038623	MTURN	maturin, neural progenitor differentiation regulator homolog	260.629	-0.0200849	1.2485	-0.0160872	0.987165	0.999108	FALSE
ENSECAG00000012512	COX6A1	cytochrome c oxidase subunit 6A1	682.305	-0.0194782	1.00415	-0.0193977	0.984524	0.999108	FALSE
ENSECAG00000019086	POLR3B	RNA polymerase III subunit B	203.314	-0.017814	1.47949	-0.0120406	0.990393	0.999108	FALSE
ENSECAG00000026930	SEC61B	SEC61 translocon subunit beta	790.213	-0.0167888	0.637937	-0.0263173	0.979004	0.999108	FALSE
ENSECAG00000017836	ARID4B	AT-rich interaction domain 4B	1473.08	-0.0166549	0.794819	-0.0209543	0.983282	0.999108	FALSE
ENSECAG00000019913	FURIN	furin, paired basic amino acid cleaving enzyme	124.267	-0.0153957	1.34832	-0.0114184	0.99089	0.999108	FALSE
ENSECAG00000021177	CDK2	cyclin dependent kinase 2	521.19	-0.0152506	0.69478	-0.0219502	0.982488	0.999108	FALSE
ENSECAG00000016707	ATRX	ATRX chromatin remodeler	3887.17	-0.01466	0.576408	-0.0254334	0.979709	0.999108	FALSE
ENSECAG00000009313	KCNK1	potassium two pore domain channel subfamily K member 1	863.708	-0.014368	0.775667	-0.0185234	0.985221	0.999108	FALSE
ENSECAG00000001815	PYURF	PIGY upstream open reading frame	402.829	-0.0136892	0.719412	-0.0190283	0.984819	0.999108	FALSE
ENSECAG00000012986	BTBD7	BTB domain containing 7	318.863	-0.0133519	1.20197	-0.0111083	0.991137	0.999108	FALSE
ENSECAG00000020882	NR1H2	nuclear receptor subfamily 1 group H member 2	526.948	-0.0129431	1.09273	-0.0118447	0.990549	0.999108	FALSE
ENSECAG00000023181	CNOT3	CCR4-NOT transcription complex subunit 3	134.85	-0.0125541	1.28595	-0.00976253	0.992211	0.999108	FALSE
ENSECAG00000022582	FBXW7	F-box and WD repeat domain containing 7	2456.14	-0.012203	0.536183	-0.0227589	0.981843	0.999108	FALSE
ENSECAG00000018676	RAD52	RAD52 homolog, DNA repair protein	142.445	-0.0109719	1.69872	-0.00645891	0.994847	0.999108	FALSE
ENSECAG00000024437	CUL5	cullin 5	859.165	-0.0106933	1.08264	-0.0098771	0.992119	0.999108	FALSE
ENSECAG00000019642	MRPL55	mitochondrial ribosomal protein L55	264.97	-0.0106353	1.22914	-0.00865264	0.993096	0.999108	FALSE
ENSECAG00000019993	KALRN	kalirin RhoGEF kinase	264.302	-0.0101038	1.01639	-0.00994078	0.992069	0.999108	FALSE
ENSECAG00000000558	KIF5B	kinesin family member 5B	506.585	-0.00974655	0.794352	-0.0122698	0.99021	0.999108	FALSE
ENSECAG00000012226	CPLANE1	ciliogenesis and planar polarity effector complex subunit 1	247.895	-0.00843119	1.63298	-0.00516308	0.99588	0.999108	FALSE
ENSECAG00000014753	CCDC50	coiled-coil domain containing 50	401.138	-0.00817023	1.25254	-0.00652291	0.994796	0.999108	FALSE
ENSECAG00000000377	BRIX1	biosis of ribosomes BRX1	1873.42	-0.00730074	0.525354	-0.0138968	0.988912	0.999108	FALSE
ENSECAG00000019122	CWC25	CWC25 spliceosome associated protein homolog	2041.64	-0.00469392	0.676581	-0.00693771	0.994465	0.999108	FALSE
ENSECAG00000024179	EBNA1BP2	EBNA1 binding protein 2	1586.55	-0.00423858	0.608066	-0.00697059	0.994438	0.999108	FALSE
ENSECAG00000011409	TIMM44	translocase of inner mitochondrial membrane 44	1245.85	-0.00359891	0.668076	-0.00538698	0.995702	0.999108	FALSE
ENSECAG00000011151	USP1	ubiquitin specific peptidase 1	1157.05	-0.00343395	0.621434	-0.00552585	0.995591	0.999108	FALSE
ENSECAG00000016931	KMT2E	lysine methyltransferase 2E (inactive)	2454.48	-0.00244529	0.537235	-0.00455163	0.996368	0.999108	FALSE
ENSECAG00000013588	WDR20	WD repeat domain 20	2278.64	-0.00193593	0.464988	-0.00416341	0.996678	0.999108	FALSE
ENSECAG00000033879			45.4393	-0.00153641	1.56879	-0.00097936	0.999219	0.999564	FALSE
ENSECAG00000019916	BPTF	bromodomain PHD finger transcription factor	446.365	-0.0015152	1.42546	-0.00106296	0.999152	0.999564	FALSE
ENSECAG00000011954	ATG3	autophagy related 3	453.389	-0.00137835	1.37327	-0.0010037	0.999199	0.999564	FALSE
ENSECAG00000041912			133.523	-0.000513443	1.55252	-0.000330717	0.999736	0.999736	FALSE
ENSECAG00000033153			531.408	0.00181374	0.723339	0.00250745	0.997999	0.999564	FALSE
ENSECAG00000013129	TOP1MT	DNA topoisomerase I mitochondrial	1185.11	0.00220973	0.831695	0.00265691	0.99788	0.999564	FALSE
ENSECAG00000012292	SRRT	serrate, RNA effector molecule	233.131	0.00226783	1.47885	0.00153351	0.998776	0.999564	FALSE
ENSECAG00000000072	MAP7D2	MAP7 domain containing 2	1434.12	0.00343159	0.770664	0.00445278	0.996447	0.999108	FALSE
ENSECAG00000039232			1954.3	0.0052274	0.579802	0.00901584	0.992807	0.999108	FALSE
ENSECAG00000030196			140.078	0.0058735	1.26966	0.00462605	0.996309	0.999108	FALSE
ENSECAG00000011095	EEF1E1	eukaryotic translation elongation factor 1 epsilon 1	84.9643	0.00725468	1.75024	0.00414496	0.996693	0.999108	FALSE
ENSECAG00000023433	TMEM231	transmembrane protein 231	115.889	0.00923864	1.4557	0.00634651	0.994936	0.999108	FALSE
ENSECAG00000008296	CCBE1	collagen and calcium binding EGF domains 1	313.09	0.00940229	1.09684	0.00857218	0.99316	0.999108	FALSE
ENSECAG00000030438	BRD4	bromodomain containing 4	3864.34	0.0109117	0.586321	0.0186104	0.985152	0.999108	FALSE
ENSECAG00000014983	HIRIP3	HIRA interacting protein 3	525.506	0.011864	1.15798	0.0102454	0.991826	0.999108	FALSE
ENSECAG00000018276	RAB3GAP2	RAB3 GTPase activating non-catalytic protein subunit 2	330.2	0.0119962	1.20461	0.00995858	0.992054	0.999108	FALSE
ENSECAG00000008148	NPTN	neuroplastin	220.252	0.0136092	1.37685	0.00988436	0.992114	0.999108	FALSE
ENSECAG00000017293			1479	0.0171758	0.640114	0.0268324	0.978593	0.999108	FALSE
ENSECAG00000026921	APEX2	apurinic/apyrimidinic endodeoxyribonuclease 2	149.081	0.0179298	1.34818	0.0132993	0.989389	0.999108	FALSE
ENSECAG00000019560	KCTD10	potassium channel tetramerization domain containing 10	207.148	0.0186136	1.52362	0.0122167	0.990253	0.999108	FALSE
ENSECAG00000033788	TUBA4A	tubulin alpha 4a	157.685	0.0186288	1.26702	0.0147028	0.988269	0.999108	FALSE
ENSECAG00000017611	C8H18orf63	chromosome 8 C18orf63 homolog	128.817	0.0187618	1.77885	0.0105471	0.991585	0.999108	FALSE
ENSECAG00000020656	CLDND1	claudin domain containing 1	4222.43	0.0190557	0.526544	0.0361901	0.971131	0.999108	FALSE
ENSECAG00000006022	TMEM104	transmembrane protein 104	122.999	0.0206237	1.58833	0.0129845	0.98964	0.999108	FALSE
ENSECAG00000006011	RALGPS2	Ral GEF with PH domain and SH3 binding motif 2	257.061	0.0212264	1.55271	0.0136705	0.989093	0.999108	FALSE
ENSECAG00000025040	ZCCHC17	zinc finger CCHC-type containing 17	1050.41	0.0213746	0.678255	0.0315141	0.97486	0.999108	FALSE
ENSECAG00000033970	TRMT112	tRNA methyltransferase activator subunit 11-2	353.025	0.0218062	1.27287	0.0171316	0.986332	0.999108	FALSE
ENSECAG00000017235	MTF1	metal regulatory transcription factor 1	156.485	0.0232422	1.27505	0.0182285	0.985457	0.999108	FALSE
ENSECAG00000000711	COIL	coilin	574.292	0.0246285	1.02833	0.02395	0.980892	0.999108	FALSE
ENSECAG00000004792	UBE3A	ubiquitin protein ligase E3A	250.59	0.0246411	1.44288	0.0170777	0.986375	0.999108	FALSE
ENSECAG00000014356	GTF3C2	ral transcription factor IIIC subunit 2	152.154	0.0246421	1.80725	0.0136352	0.989121	0.999108	FALSE
ENSECAG00000021030	IFT74	intraflagellar transport 74	746.24	0.0258273	0.760863	0.0339447	0.972921	0.999108	FALSE
ENSECAG00000028670	DPPA3	developmental pluripotency associated 3	6966.79	0.0258497	0.367978	0.070248	0.943996	0.999108	FALSE
ENSECAG00000017632	GCM2	glial cells missing transcription factor 2	43.8348	0.026489	1.7532	0.0151089	0.987945	0.999108	FALSE
ENSECAG00000024592	ALG5	ALG5 dolichyl-phosphate beta-glucosyltransferase	284.882	0.0265412	1.32009	0.0201056	0.983959	0.999108	FALSE
ENSECAG00000001445	CHD7	chromodomain helicase DNA binding protein 7	1175.44	0.0270011	0.862326	0.0313119	0.975021	0.999108	FALSE
ENSECAG00000018476	TPX2	TPX2 microtubule nucleation factor	2052.61	0.0271107	0.596576	0.0454438	0.963754	0.999108	FALSE
ENSECAG00000017784	OSR2	odd-skipped related transciption factor 2	89.3207	0.0272477	1.82859	0.0149009		1	FALSE
ENSECAG00000013300	CXCL10	C-X-C motif chemokine ligand 10	191.233	0.0279031	1.55793	0.0179104	0.98571	0.999108	FALSE
ENSECAG00000016692	H2AZ2	H2A.Z histone 2	480.661	0.0299152	0.944634	0.0316686	0.974736	0.999108	FALSE
ENSECAG00000015132	SMAD2	SMAD family member 2	543.489	0.0301881	1.10726	0.0272638	0.978249	0.999108	FALSE
ENSECAG00000011198	AMD1	adenosylmethionine decarboxylase 1	6780.12	0.0303305	0.458374	0.0661698	0.947243	0.999108	FALSE
ENSECAG00000024286	SIPA1L1	signal induced proliferation associated 1 like 1	947.959	0.0303579	0.74979	0.0404886	0.967704	0.999108	FALSE
ENSECAG00000012794	LYAR	Ly1 antibody reactive	1311.65	0.0303606	0.632898	0.0479707	0.96174	0.999108	FALSE
ENSECAG00000011535	KCTD9	potassium channel tetramerization domain containing 9	526.387	0.0309453	0.98695	0.0313545	0.974987	0.999108	FALSE
ENSECAG00000024364	RCC2	regulator of chromosome condensation 2	592.264	0.0327563	0.812255	0.0403276	0.967832	0.999108	FALSE
ENSECAG00000013375	ABHD16A	abhydrolase domain containing 16A, phospholipase	133.196	0.0340438	1.26356	0.0269428	0.978505	0.999108	FALSE
ENSECAG00000023366	SUDS3	SDS3 homolog, SIN3A corepressor complex component	4809.71	0.0365046	0.382642	0.0954013	0.923996	0.999108	FALSE
ENSECAG00000016495	NUSAP1	nucleolar and spindle associated protein 1	2298.27	0.0373266	0.486357	0.0767474	0.938825	0.999108	FALSE
ENSECAG00000013333	RBM34	RNA binding motif protein 34	365.826	0.037667	0.809721	0.0465185	0.962897	0.999108	FALSE
ENSECAG00000009536	YWHAE	tyrosine 3-monooxygenase/tryptophan 5-monooxygenase activation protein epsilon	481.339	0.0387205	1.19985	0.0322713	0.974256	0.999108	FALSE
ENSECAG00000020572	PFDN2	prefoldin subunit 2	195.693	0.0395778	1.35106	0.029294	0.97663	0.999108	FALSE
ENSECAG00000018405	EHMT1	euchromatic histone lysine methyltransferase 1	636.489	0.039807	1.06998	0.0372035	0.970323	0.999108	FALSE
ENSECAG00000000160	COX5A	cytochrome c oxidase subunit 5A	261.13	0.0399486	1.68368	0.023727		1	FALSE
ENSECAG00000022114	WIPI2	WD repeat domain, phosphoinositide interacting 2	228.707	0.0420722	1.4196	0.0296367	0.976357	0.999108	FALSE
ENSECAG00000014473	SEC14L1	SEC14 like lipid binding 1	323.902	0.0425528	1.06311	0.0400267	0.968072	0.999108	FALSE
ENSECAG00000018135			218.947	0.0426495	1.41078	0.0302312	0.975883	0.999108	FALSE
ENSECAG00000019032	ARID2	AT-rich interaction domain 2	6096.15	0.0450116	0.497474	0.0904802	0.927906	0.999108	FALSE
ENSECAG00000000767	SLC4A7	solute carrier family 4 member 7	444.418	0.0455801	1.13123	0.0402924	0.96786	0.999108	FALSE
ENSECAG00000020262	CNOT4	CCR4-NOT transcription complex subunit 4	1357.7	0.0477527	0.73312	0.0651363	0.948066	0.999108	FALSE
ENSECAG00000012777	MPHOSPH8	M-phase phosphoprotein 8	1791.54	0.049344	0.703834	0.0701074	0.944108	0.999108	FALSE
ENSECAG00000036783	SVIP	small VCP interacting protein	271.139	0.0497136	0.910176	0.0546198	0.956441	0.999108	FALSE
ENSECAG00000021478	EIF4A1	eukaryotic translation initiation factor 4A1	315.24	0.0504111	1.13178	0.0445414	0.964473	0.999108	FALSE
ENSECAG00000000834	LARP7	La ribonucleoprotein 7, transcriptional regulator	2007.74	0.0510038	0.592667	0.086058	0.93142	0.999108	FALSE
ENSECAG00000020230	PSMD9	proteasome 26S subunit, non-ATPase 9	1583.18	0.0527799	0.647139	0.0815588	0.934998	0.999108	FALSE
ENSECAG00000009708	UMPS	uridine monophosphate synthetase	660.555	0.0532799	0.714138	0.0746072	0.940527	0.999108	FALSE
ENSECAG00000015851	ASXL3	ASXL transcriptional regulator 3	133.987	0.0534673	1.75498	0.030466	0.975695	0.999108	FALSE
ENSECAG00000015900	POLR3GL	RNA polymerase III subunit GL	701.26	0.0535245	0.905945	0.0590813	0.952887	0.999108	FALSE
ENSECAG00000022067	KYAT1	kynurenine aminotransferase 1	111.786	0.0537862	1.57242	0.0342061	0.972713	0.999108	FALSE
ENSECAG00000024573			96.2724	0.0548988	1.27665	0.0430021	0.9657	0.999108	FALSE
ENSECAG00000024728	DNAJC21	DnaJ heat shock protein family (Hsp40) member C21	1170.16	0.0556068	0.758767	0.0732857	0.941579	0.999108	FALSE
ENSECAG00000024473	MCM10	minichromosome maintenance 10 replication initiation factor	1247.87	0.0558672	0.704985	0.079246	0.936837	0.999108	FALSE
ENSECAG00000023119	CHADL	chondroadherin like	66.773	0.0565916	1.47729	0.0383077	0.969442	0.999108	FALSE
ENSECAG00000018723	ATF2	activating transcription factor 2	450.914	0.0566835	1.16585	0.0486198	0.961222	0.999108	FALSE
ENSECAG00000008715	TMEM9B	TMEM9 domain family member B	556.797	0.0571402	0.926474	0.061675	0.950822	0.999108	FALSE
ENSECAG00000032191	RSRC1	arginine and serine rich coiled-coil 1	1315.62	0.0583184	0.780474	0.0747217	0.940436	0.999108	FALSE
ENSECAG00000030990	ZNRF1	zinc and ring finger 1	188.627	0.0585625	1.42582	0.0410728	0.967238	0.999108	FALSE
ENSECAG00000022567	RACK1	receptor for activated C kinase 1	1269.68	0.0601639	0.90478	0.0664956	0.946983	0.999108	FALSE
ENSECAG00000011099	VAV3	vav guanine nucleotide exchange factor 3	1233.54	0.0603703	0.562636	0.107299	0.914552	0.999108	FALSE
ENSECAG00000017121	RPF2	ribosome production factor 2 homolog	883.685	0.0609492	0.963179	0.0632792	0.949544	0.999108	FALSE
ENSECAG00000019640	TOMM20	translocase of outer mitochondrial membrane 20	309.974	0.0611482	0.954726	0.0640479	0.948932	0.999108	FALSE
ENSECAG00000023851	SCAF11	SR-related CTD associated factor 11	365.496	0.0612501	0.973254	0.0629333	0.94982	0.999108	FALSE
ENSECAG00000018018	RRP1B	ribosomal RNA processing 1B	393.685	0.0612859	0.736409	0.0832226	0.933675	0.999108	FALSE
ENSECAG00000010769	CWC22	CWC22 spliceosome associated protein homolog	637.627	0.0627226	0.830489	0.0755249	0.939797	0.999108	FALSE
ENSECAG00000011953	TMEM248	transmembrane protein 248	3912.69	0.0653912	0.511027	0.127961	0.89818	0.999108	FALSE
ENSECAG00000011917	DOCK8	dedicator of cytokinesis 8	245.784	0.0657774	1.55431	0.0423195	0.966244	0.999108	FALSE
ENSECAG00000010855	PTPRA	protein tyrosine phosphatase receptor type A	648.465	0.065795	0.987763	0.0666101	0.946892	0.999108	FALSE
ENSECAG00000023488	MED13L	mediator complex subunit 13L	1243.87	0.0679838	0.708741	0.0959218	0.923583	0.999108	FALSE
ENSECAG00000020316	RPS9	ribosomal protein S9	2070.45	0.0688316	0.460089	0.149605	0.881076	0.999108	FALSE
ENSECAG00000010610	HSP90B1	heat shock protein 90 beta family member 1	1747.39	0.0690795	0.538272	0.128336	0.897883	0.999108	FALSE
ENSECAG00000012230	KAT6B	lysine acetyltransferase 6B	1167.65	0.0705267	0.837813	0.0841795	0.932914	0.999108	FALSE
ENSECAG00000020144	UBXN2A	UBX domain protein 2A	1120.55	0.0710472	0.68281	0.104051	0.917129	0.999108	FALSE
ENSECAG00000013624	GAR1	GAR1 ribonucleoprotein	182.306	0.0720496	1.32199	0.054501	0.956536	0.999108	FALSE
ENSECAG00000010685	RSF1	remodeling and spacing factor 1	614.04	0.0721278	1.09125	0.0660963	0.947301	0.999108	FALSE
ENSECAG00000021241	CPNE3	copine 3	611.614	0.0727354	0.872909	0.0833253	0.933593	0.999108	FALSE
ENSECAG00000020166	YEATS4	YEATS domain containing 4	2337.84	0.0734168	0.544675	0.13479	0.892778	0.999108	FALSE
ENSECAG00000018153			364.33	0.0734986	1.20268	0.0611126	0.95127	0.999108	FALSE
ENSECAG00000009617	UBE2Q2	ubiquitin conjugating enzyme E2 Q2	3142	0.0746254	0.478314	0.156018	0.876019	0.999108	FALSE
ENSECAG00000024086	PSMA1	proteasome 20S subunit alpha 1	69.2091	0.0756666	1.69187	0.0447236	0.964328	0.999108	FALSE
ENSECAG00000009694	IWS1	interacts with SUPT6H, CTD assembly factor 1	3308.92	0.0762568	0.497467	0.15329	0.87817	0.999108	FALSE
ENSECAG00000014960	ERI3	ERI1 exoribonuclease family member 3	444.232	0.0765875	0.885972	0.0864446	0.931113	0.999108	FALSE
ENSECAG00000022320	MGST3	microsomal glutathione S-transferase 3	405.444	0.079769	0.774835	0.10295	0.918003	0.999108	FALSE
ENSECAG00000009543	EPSTI1	epithelial stromal interaction 1	2700.37	0.0811302	0.484351	0.167503	0.866975	0.999108	FALSE
ENSECAG00000023322	ID3	inhibitor of DNA binding 3, HLH protein	868.793	0.081215	0.697875	0.116375	0.907356	0.999108	FALSE
ENSECAG00000008676	HNRNPA1	heteroous nuclear ribonucleoprotein A1	10837.6	0.0816761	0.457237	0.17863	0.858229	0.999108	FALSE
ENSECAG00000036766			2746.46	0.0822403	0.634314	0.129652	0.896841	0.999108	FALSE
ENSECAG00000018407	SNRPB2	small nuclear ribonucleoprotein polypeptide B2	5916.1	0.0835425	0.376941	0.221633	0.8246	0.999108	FALSE
ENSECAG00000016010	NUP153	nucleoporin 153	878.516	0.0836161	0.99192	0.0842972	0.93282	0.999108	FALSE
ENSECAG00000007240	CYLD	CYLD lysine 63 deubiquitinase	515.158	0.0838723	0.941499	0.0890838	0.929015	0.999108	FALSE
ENSECAG00000002756	AAK1	AP2 associated kinase 1	745.526	0.0842965	0.676597	0.124589	0.900849	0.999108	FALSE
ENSECAG00000009290	IRAG2	inositol 1,4,5-triphosphate receptor associated 2	351.413	0.0852693	1.13354	0.0752242		1	FALSE
ENSECAG00000024701	AOX4	aldehyde oxidase 4	99.2572	0.0864588	1.57046	0.0550533	0.956096	0.999108	FALSE
ENSECAG00000023494	SMIM12	small integral membrane protein 12	88.1523	0.0882429	1.36685	0.0645592	0.948525	0.999108	FALSE
ENSECAG00000016586	NUCB2	nucleobindin 2	430.301	0.0883081	1.44054	0.0613019	0.951119	0.999108	FALSE
ENSECAG00000007559	KIF16B	kinesin family member 16B	242.094	0.0897202	1.44661	0.062021	0.950546	0.999108	FALSE
ENSECAG00000022075	RABL6	RAB, member RAS onco family like 6	995.479	0.0903019	0.741724	0.121746	0.9031	0.999108	FALSE
ENSECAG00000038817	SNAP29	synaptosome associated protein 29	324.607	0.0905561	1.05664	0.0857016	0.931704	0.999108	FALSE
ENSECAG00000024079	RPL31	ribosomal protein L31	203.243	0.0911874	1.65729	0.055022	0.956121	0.999108	FALSE
ENSECAG00000012666	PSIP1	PC4 and SFRS1 interacting protein 1	1622.37	0.0921366	0.777385	0.118521	0.905655	0.999108	FALSE
ENSECAG00000019681	MAN1A2	mannosidase alpha class 1A member 2	238.966	0.0934939	1.43977	0.0649368	0.948224	0.999108	FALSE
ENSECAG00000017022	UPF2	UPF2 regulator of nonsense mediated mRNA decay	581.409	0.094609	0.880482	0.107451	0.914431	0.999108	FALSE
ENSECAG00000024976	OCIAD1	OCIA domain containing 1	477.894	0.0948479	0.937044	0.10122	0.919376	0.999108	FALSE
ENSECAG00000024578	NFIB	nuclear factor I B	759.465	0.0963039	1.02825	0.0936576	0.925381	0.999108	FALSE
ENSECAG00000008431	HOXA9	homeobox A9	128.532	0.0963417	1.30883	0.0736091	0.941321	0.999108	FALSE
ENSECAG00000006920	SRP72	signal recognition particle 72	1136.36	0.0967211	0.68487	0.141225	0.887692	0.999108	FALSE
ENSECAG00000016674	LAPTM4A	lysosomal protein transmembrane 4 alpha	56.0647	0.0967275	1.69701	0.0569986	0.954546	0.999108	FALSE
ENSECAG00000013700	PIR	pirin	39.2801	0.0968884	2.07515	0.0466899	0.96276	0.999108	FALSE
ENSECAG00000014982	CCDC112	coiled-coil domain containing 112	824.449	0.0975991	0.67628	0.144318	0.88525	0.999108	FALSE
ENSECAG00000009033	AP2B1	adaptor related protein complex 2 subunit beta 1	418.952	0.0978882	1.15706	0.0846007	0.932579	0.999108	FALSE
ENSECAG00000026959			2892.32	0.0983484	0.531981	0.184872	0.853329	0.999108	FALSE
ENSECAG00000022504	CTBP2	C-terminal binding protein 2	54.9121	0.100072	1.86129	0.0537648	0.957123	0.999108	FALSE
ENSECAG00000012317	COX6B1	cytochrome c oxidase subunit 6B1	131.431	0.100524	1.51018	0.0665643	0.946929	0.999108	FALSE
ENSECAG00000017105	SEC62	SEC62 homolog, preprotein translocation factor	868.31	0.100596	0.664826	0.151311	0.87973	0.999108	FALSE
ENSECAG00000007233	UBE2E3	ubiquitin conjugating enzyme E2 E3	1255.39	0.102327	0.691299	0.148022	0.882325	0.999108	FALSE
ENSECAG00000000738	CWC27	CWC27 spliceosome associated cyclophilin	856.825	0.102617	0.786141	0.130533	0.896145	0.999108	FALSE
ENSECAG00000026896	LYPD1	LY6/PLAUR domain containing 1	67.5883	0.102629	1.90929	0.0537525	0.957132	0.999108	FALSE
ENSECAG00000020872	RTF1	RTF1 homolog, Paf1/RNA polymerase II complex component	9421.24	0.103387	0.405217	0.25514	0.798615	0.999108	FALSE
ENSECAG00000016925	WAPL	WAPL cohesin release factor	7544.98	0.104071	0.49765	0.209124	0.834351	0.999108	FALSE
ENSECAG00000021002	ROCK1	Rho associated coiled-coil containing protein kinase 1	1444.35	0.104825	0.633655	0.165429	0.868607	0.999108	FALSE
ENSECAG00000036915			141.492	0.104865	1.59829	0.0656109	0.947688	0.999108	FALSE
ENSECAG00000000883	RBM27	RNA binding motif protein 27	1870.97	0.105111	0.608221	0.172817	0.862795	0.999108	FALSE
ENSECAG00000020694	CEP290	centrosomal protein 290	532.758	0.105867	1.14139	0.0927528	0.9261	0.999108	FALSE
ENSECAG00000021818	COPA	COPI coat complex subunit alpha	140.775	0.106619	1.10983	0.0960674	0.923467	0.999108	FALSE
ENSECAG00000009513	GOLGB1	golgin B1	1834.56	0.106759	0.694142	0.153799	0.877768	0.999108	FALSE
ENSECAG00000023171	MED21	mediator complex subunit 21	538.037	0.107653	1.06084	0.101479	0.91917	0.999108	FALSE
ENSECAG00000013162	PCNA	proliferating cell nuclear antigen	1046.56	0.1077	0.72367	0.148825	0.881692	0.999108	FALSE
ENSECAG00000041606			1639.18	0.107873	0.511678	0.210822	0.833026	0.999108	FALSE
ENSECAG00000023044	DDX50	DExD-box helicase 50	337.652	0.1084	1.06657	0.101634	0.919047	0.999108	FALSE
ENSECAG00000001892	PRPF38B	pre-mRNA processing factor 38B	645.056	0.108444	0.878811	0.123398	0.901792	0.999108	FALSE
ENSECAG00000013890	RPS6KB1	ribosomal protein S6 kinase B1	147.784	0.110582	1.82274	0.060668		1	FALSE
ENSECAG00000019989	SNRPG	small nuclear ribonucleoprotein polypeptide G	286.126	0.110843	1.09809	0.100942	0.919597	0.999108	FALSE
ENSECAG00000004655	TOPORS	TOP1 binding arginine/serine rich protein, E3 ubiquitin ligase	1013.67	0.111097	0.812166	0.136791	0.891196	0.999108	FALSE
ENSECAG00000043329			1038.34	0.112105	0.716125	0.156544	0.875604	0.999108	FALSE
ENSECAG00000028107			174.644	0.113509	1.06584	0.106497	0.915188	0.999108	FALSE
ENSECAG00000019333	ARL4A	ADP ribosylation factor like GTPase 4A	726.511	0.115568	0.862879	0.133933	0.893455	0.999108	FALSE
ENSECAG00000015574	NFIA	nuclear factor I A	2557.24	0.115762	0.597584	0.193718	0.846397	0.999108	FALSE
ENSECAG00000004881	LHX8	LIM homeobox 8	79.8696	0.116833	1.72779	0.0676199	0.946088	0.999108	FALSE
ENSECAG00000014258	PLRG1	pleiotropic regulator 1	4458.57	0.117664	0.485762	0.242226	0.808605	0.999108	FALSE
ENSECAG00000020854	TARS1	threonyl-tRNA synthetase 1	187.67	0.117781	1.61051	0.0731325	0.941701	0.999108	FALSE
ENSECAG00000011147	EIF4G3	eukaryotic translation initiation factor 4 gamma 3	3645.09	0.119828	0.488665	0.245215	0.80629	0.999108	FALSE
ENSECAG00000011461	ARMC10	armadillo repeat containing 10	20524.5	0.120091	0.388528	0.309093	0.757251	0.999108	FALSE
ENSECAG00000014594	EPAS1	endothelial PAS domain protein 1	375.135	0.120297	1.05619	0.113897	0.909319	0.999108	FALSE
ENSECAG00000012282	MPP7	MAGUK p55 scaffold protein 7	432.091	0.121057	1.45427	0.0832428	0.933658	0.999108	FALSE
ENSECAG00000012937	OLFML1	olfactomedin like 1	110.292	0.122371	1.79189	0.0682914	0.945554	0.999108	FALSE
ENSECAG00000010821	RACGAP1	Rac GTPase activating protein 1	260.419	0.124035	1.45103	0.085481	0.931879	0.999108	FALSE
ENSECAG00000008892	CISD1	CDGSH iron sulfur domain 1	1713.04	0.124766	0.591142	0.21106	0.832841	0.999108	FALSE
ENSECAG00000024920	XPO1	exportin 1	8385.96	0.125518	0.549573	0.228391	0.819342	0.999108	FALSE
ENSECAG00000012487	PIGF	phosphatidylinositol glycan anchor biosynthesis class F	406.114	0.126954	1.17129	0.108388	0.913688	0.999108	FALSE
ENSECAG00000021912	C21H5orf34	chromosome 21 C5orf34 homolog	804.884	0.127324	0.922718	0.137988	0.89025	0.999108	FALSE
ENSECAG00000011353	SLC49A3	solute carrier family 49 member 3	140.635	0.128583	1.65416	0.0777333	0.93804	0.999108	FALSE
ENSECAG00000028275	PLEKHF2	pleckstrin homology and FYVE domain containing 2	69.9949	0.128742	1.72158	0.0747814	0.940389	0.999108	FALSE
ENSECAG00000023738	MED10	mediator complex subunit 10	1442.53	0.129149	0.596062	0.21667	0.828465	0.999108	FALSE
ENSECAG00000015606	CSRP2	cysteine and glycine rich protein 2	270.606	0.131031	1.01978	0.128489	0.897762	0.999108	FALSE
ENSECAG00000015502	RFFL	ring finger and FYVE like domain containing E3 ubiquitin protein ligase	320.794	0.131662	1.3382	0.0983873	0.921625	0.999108	FALSE
ENSECAG00000022164	SMC4	structural maintenance of chromosomes 4	3758.64	0.134177	0.476668	0.281489	0.778335	0.999108	FALSE
ENSECAG00000024623	ATP1A1	ATPase Na+/K+ transporting subunit alpha 1	733.576	0.134777	0.661122	0.203861	0.838462	0.999108	FALSE
ENSECAG00000016155	KIF18A	kinesin family member 18A	2606.1	0.138127	0.553814	0.24941	0.803043	0.999108	FALSE
ENSECAG00000013384	STX3	syntaxin 3	1953.73	0.138967	0.599619	0.231758	0.816726	0.999108	FALSE
ENSECAG00000019475	YTHDF1	YTH N6-methyladenosine RNA binding protein 1	91.1705	0.139268	1.55257	0.0897017	0.928524	0.999108	FALSE
ENSECAG00000009383	TBCA	tubulin folding cofactor A	4193.86	0.13944	0.507924	0.274529	0.783678	0.999108	FALSE
ENSECAG00000010911	INTS12	integrator complex subunit 12	180.777	0.139685	1.6272	0.0858441	0.93159	0.999108	FALSE
ENSECAG00000024268	RPS26	ribosomal protein S26	540.903	0.140229	1.10637	0.126747	0.89914	0.999108	FALSE
ENSECAG00000017824	TERB1	telomere repeat binding bouquet formation protein 1	156.637	0.141667	1.67599	0.084527	0.932637	0.999108	FALSE
ENSECAG00000009318	EHBP1	EH domain binding protein 1	736.941	0.143643	1.2354	0.116272	0.907437	0.999108	FALSE
ENSECAG00000002544	PCBP1	poly(rC) binding protein 1	1440.35	0.143785	0.484104	0.297012	0.766457	0.999108	FALSE
ENSECAG00000014411	NKAPD1	NKAP domain containing 1	1405.25	0.14446	0.559976	0.257975	0.796426	0.999108	FALSE
ENSECAG00000006296	CCDC160	coiled-coil domain containing 160	765.79	0.145114	1.0101	0.143662	0.885767	0.999108	FALSE
ENSECAG00000024436	ANK2	ankyrin 2	817.576	0.146969	1.05073	0.139874	0.88876	0.999108	FALSE
ENSECAG00000005186			370.497	0.14798	0.76079	0.194509	0.845778	0.999108	FALSE
ENSECAG00000016120	ESCO1	establishment of sister chromatid cohesion N-acetyltransferase 1	327.224	0.149537	1.18021	0.126703	0.899175	0.999108	FALSE
ENSECAG00000009218	EGFL6	EGF like domain multiple 6	274.397	0.149561	1.15804	0.12915	0.897239	0.999108	FALSE
ENSECAG00000006321	GOLPH3	golgi phosphoprotein 3	737.057	0.149612	0.660712	0.22644	0.820859	0.999108	FALSE
ENSECAG00000007008	CDKL5	cyclin dependent kinase like 5	502.766	0.149869	1.17413	0.127643	0.898432	0.999108	FALSE
ENSECAG00000012597	EIF5	eukaryotic translation initiation factor 5	1465.12	0.149888	0.55091	0.272073	0.785566	0.999108	FALSE
ENSECAG00000043510			66.0659	0.151774	1.89871	0.0799353	0.936289	0.999108	FALSE
ENSECAG00000039039			29.1189	0.15182	2.03578	0.0745759	0.940552	0.999108	FALSE
ENSECAG00000000370	RPS11	ribosomal protein S11	2326.28	0.152148	0.524065	0.290322	0.77157	0.999108	FALSE
ENSECAG00000012031	DNAAF2	dynein axonemal assembly factor 2	522.406	0.152152	0.866337	0.175627	0.860587	0.999108	FALSE
ENSECAG00000018148	SNRPN	small nuclear ribonucleoprotein polypeptide N	762.358	0.152273	0.864245	0.176192	0.860143	0.999108	FALSE
ENSECAG00000020978	RPS25	ribosomal protein S25	343.677	0.153826	1.04069	0.147812	0.882491	0.999108	FALSE
ENSECAG00000014338	EGR1	early growth response 1	356.131	0.153837	1.05643	0.145619	0.884222	0.999108	FALSE
ENSECAG00000018843	TMEM165	transmembrane protein 165	106.43	0.15436	1.83977	0.0839017		1	FALSE
ENSECAG00000022491	MBIP	MAP3K12 binding inhibitory protein 1	378.331	0.155794	0.984831	0.158193	0.874305	0.999108	FALSE
ENSECAG00000023186	ZCCHC9	zinc finger CCHC-type containing 9	386.764	0.15601	0.908849	0.171656	0.863708	0.999108	FALSE
ENSECAG00000006876	UTP20	UTP20 small subunit processome component	1831.97	0.156068	0.656768	0.23763	0.812168	0.999108	FALSE
ENSECAG00000021299	NOP56	NOP56 ribonucleoprotein	636.819	0.156948	0.723074	0.217056	0.828165	0.999108	FALSE
ENSECAG00000019331			930.187	0.159174	0.736969	0.215984	0.829	0.999108	FALSE
ENSECAG00000034616			47.1561	0.16246	1.81626	0.0894475	0.928726	0.999108	FALSE
ENSECAG00000015121	ACSF3	acyl-CoA synthetase family member 3	83.4949	0.163387	1.87644	0.087073	0.930613	0.999108	FALSE
ENSECAG00000007629	DNAJC1	DnaJ heat shock protein family (Hsp40) member C1	812.483	0.164753	0.848099	0.194261	0.845971	0.999108	FALSE
ENSECAG00000015816	RPLP0	ribosomal protein lateral stalk subunit P0	798.078	0.165712	0.878065	0.188724	0.850309	0.999108	FALSE
ENSECAG00000024215	GINS2	GINS complex subunit 2	126.166	0.166361	1.43011	0.116327	0.907393	0.999108	FALSE
ENSECAG00000021459	DRG1	developmentally regulated GTP binding protein 1	287.948	0.166617	1.13961	0.146206	0.883759	0.999108	FALSE
ENSECAG00000012220	ITPRID2	ITPR interacting domain containing 2	1263.35	0.167345	0.727603	0.229994	0.818096	0.999108	FALSE
ENSECAG00000001555			2198.87	0.16805	0.697683	0.240869	0.809657	0.999108	FALSE
ENSECAG00000011079	MRPL19	mitochondrial ribosomal protein L19	547.106	0.170695	0.712781	0.239477	0.810736	0.999108	FALSE
ENSECAG00000012333	MRPS23	mitochondrial ribosomal protein S23	191.455	0.171347	1.40194	0.122222	0.902724	0.999108	FALSE
ENSECAG00000043797			2154.01	0.17177	0.562202	0.30553	0.759962	0.999108	FALSE
ENSECAG00000029065			16.9725	0.171797	2.31768	0.0741245	0.940911	0.999108	FALSE
ENSECAG00000018465	MS4A5	membrane spanning 4-domains A5	72.3391	0.172656	1.38688	0.124493	0.900925	0.999108	FALSE
ENSECAG00000007562	AUNIP	aurora kinase A and ninein interacting protein	793.617	0.172831	0.652749	0.264774	0.791183	0.999108	FALSE
ENSECAG00000021146	SMU1	SMU1 DNA replication regulator and spliceosomal factor	11163.9	0.172891	0.437503	0.395177	0.692713	0.999108	FALSE
ENSECAG00000011450	AMZ2	archaelysin family metallopeptidase 2	350.426	0.175312	1.65504	0.105926	0.915641	0.999108	FALSE
ENSECAG00000011218	HAT1	histone acetyltransferase 1	2167.56	0.175521	0.604405	0.290402	0.771508	0.999108	FALSE
ENSECAG00000015743	HMGXB3	HMG-box containing 3	234.421	0.175905	1.33059	0.1322	0.894826	0.999108	FALSE
ENSECAG00000007955	HNRNPU	heteroous nuclear ribonucleoprotein U	290.767	0.176471	1.38225	0.12767	0.89841	0.999108	FALSE
ENSECAG00000023790	MNAT1	MNAT1 component of CDK activating kinase	532.395	0.177079	0.71377	0.248089	0.804065	0.999108	FALSE
ENSECAG00000011135	GPATCH4	G-patch domain containing 4	652.885	0.177118	1.0347	0.171179	0.864083	0.999108	FALSE
ENSECAG00000015974			183.965	0.177262	1.36265	0.130086	0.896498	0.999108	FALSE
ENSECAG00000012734	BAIAP2L1	BAR/IMD domain containing adaptor protein 2 like 1	528.494	0.178317	0.923043	0.193184	0.846815	0.999108	FALSE
ENSECAG00000012900	MSN	moesin	571.417	0.180248	0.798277	0.225796	0.82136	0.999108	FALSE
ENSECAG00000002187	C1D	C1D nuclear receptor corepressor	400.28	0.180681	1.26334	0.143018	0.886276	0.999108	FALSE
ENSECAG00000012968	UBFD1	ubiquitin family domain containing 1	280.422	0.180953	1.51944	0.119092	0.905202	0.999108	FALSE
ENSECAG00000013727	LCMT1	leucine carboxyl methyltransferase 1	835.87	0.181462	0.88431	0.205202	0.837415	0.999108	FALSE
ENSECAG00000017560	USP33	ubiquitin specific peptidase 33	790.748	0.1815	0.935455	0.194023	0.846158	0.999108	FALSE
ENSECAG00000008989	AUH	AU RNA binding methylglutaconyl-CoA hydratase	299.86	0.182171	1.42571	0.127776	0.898326	0.999108	FALSE
ENSECAG00000009162			8204.02	0.182411	0.49135	0.371244	0.710456	0.999108	FALSE
ENSECAG00000009776	CEP57L1	centrosomal protein 57 like 1	439.927	0.182668	1.2091	0.151078	0.879915	0.999108	FALSE
ENSECAG00000022743	GPATCH1	G-patch domain containing 1	662.892	0.183192	0.676998	0.270594	0.786703	0.999108	FALSE
ENSECAG00000021545	MTSS1	MTSS I-BAR domain containing 1	3341.39	0.183341	0.520132	0.35249	0.724471	0.999108	FALSE
ENSECAG00000014113	CCNG2	cyclin G2	242.673	0.18335	1.16615	0.157226	0.875067	0.999108	FALSE
ENSECAG00000022620	PWP1	PWP1 homolog, endonuclein	1081.26	0.184883	0.630245	0.293351	0.769254	0.999108	FALSE
ENSECAG00000006712	WRAP73	WD repeat containing, antisense to TP73	288.669	0.185501	1.31922	0.140614	0.888175	0.999108	FALSE
ENSECAG00000010969	CTR9	CTR9 homolog, Paf1/RNA polymerase II complex component	3184.95	0.185929	0.538392	0.34534	0.729839	0.999108	FALSE
ENSECAG00000014997			145.939	0.18598	1.17656	0.158072	0.8744	0.999108	FALSE
ENSECAG00000024914	GTF2B	ral transcription factor IIB	1264.89	0.186203	0.653681	0.284853	0.775757	0.999108	FALSE
ENSECAG00000019180	CDC42	cell division cycle 42	3489.88	0.186491	0.415724	0.448593	0.653725	0.999108	FALSE
ENSECAG00000018570	USP10	ubiquitin specific peptidase 10	334.138	0.187354	1.18584	0.157993	0.874462	0.999108	FALSE
ENSECAG00000000782	HNRNPA2B1	heteroous nuclear ribonucleoprotein A2/B1	484.684	0.187543	1.16946	0.160367	0.872592	0.999108	FALSE
ENSECAG00000019979	RBBP7	RB binding protein 7, chromatin remodeling factor	858.769	0.187911	0.611292	0.3074	0.758539	0.999108	FALSE
ENSECAG00000019024	FAM204A	family with sequence similarity 204 member A	957.907	0.188162	0.60574	0.310632	0.75608	0.999108	FALSE
ENSECAG00000025118	TADA2A	transcriptional adaptor 2A	255.736	0.18835	1.32514	0.142136	0.886972	0.999108	FALSE
ENSECAG00000016959	B3GNT2	UDP-GlcNAc:betaGal beta-1,3-N-acetylglucosaminyltransferase 2	570.217	0.188663	0.831093	0.227005	0.82042	0.999108	FALSE
ENSECAG00000006289	NCOR1	nuclear receptor corepressor 1	3679.3	0.191149	0.511282	0.373862	0.708507	0.999108	FALSE
ENSECAG00000019601	DHX8	DEAH-box helicase 8	1044.97	0.192056	0.693143	0.27708	0.781719	0.999108	FALSE
ENSECAG00000039416			540.966	0.192134	0.908995	0.21137	0.832599	0.999108	FALSE
ENSECAG00000000977	S100Z	S100 calcium binding protein Z	1749.56	0.193034	0.531687	0.36306	0.71656	0.999108	FALSE
ENSECAG00000013359	LRRC8A	leucine rich repeat containing 8 VRAC subunit A	4350.31	0.19578	0.524817	0.373044	0.709116	0.999108	FALSE
ENSECAG00000008634	NCAPH	non-SMC condensin I complex subunit H	525.96	0.196105	0.966847	0.202829	0.839269	0.999108	FALSE
ENSECAG00000008757	FAAP24	FA core complex associated protein 24	418.714	0.196807	0.990584	0.198678	0.842515	0.999108	FALSE
ENSECAG00000011539	CHKA	choline kinase alpha	485.699	0.197131	0.69618	0.28316	0.777054	0.999108	FALSE
ENSECAG00000010776	TERF2IP	TERF2 interacting protein	286.636	0.197215	1.10482	0.178505	0.858327	0.999108	FALSE
ENSECAG00000014948	CIP2A	cellular inhibitor of PP2A	854.913	0.197949	0.842218	0.235033	0.814183	0.999108	FALSE
ENSECAG00000009970	TIAL1	TIA1 cytotoxic granule associated RNA binding protein like 1	44.94	0.198338	2.14924	0.0922829	0.926473	0.999108	FALSE
ENSECAG00000010789	AKIRIN2	akirin 2	688.945	0.199604	0.737017	0.270827	0.786524	0.999108	FALSE
ENSECAG00000006358	ETAA1	ETAA1 activator of ATR kinase	408.577	0.199703	1.42641	0.140004	0.888657	0.999108	FALSE
ENSECAG00000023761	CEP164	centrosomal protein 164	685.031	0.202481	1.3157	0.153896	0.877692	0.999108	FALSE
ENSECAG00000015930	TSN	translin	61.6709	0.202966	1.74271	0.116466	0.907283	0.999108	FALSE
ENSECAG00000011405	BLM	BLM RecQ like helicase	441.381	0.203338	0.932943	0.217954	0.827465	0.999108	FALSE
ENSECAG00000012845	MAPRE2	microtubule associated protein RP/EB family member 2	1401.38	0.203357	0.800527	0.254029	0.799473	0.999108	FALSE
ENSECAG00000007373	SHTN1	shootin 1	656.141	0.203742	1.2819	0.158938	0.873718	0.999108	FALSE
ENSECAG00000018925	HEATR6	HEAT repeat containing 6	794.956	0.203815	0.658556	0.309488	0.75695	0.999108	FALSE
ENSECAG00000024418	GLOD4	glyoxalase domain containing 4	56.3413	0.205643	1.93883	0.106065	0.915531	0.999108	FALSE
ENSECAG00000014869	PPM1D	protein phosphatase, Mg2+/Mn2+ dependent 1D	269.269	0.20666	1.26693	0.163119	0.870424	0.999108	FALSE
ENSECAG00000020261	BRD1	bromodomain containing 1	641.362	0.207155	0.970016	0.213559	0.830891	0.999108	FALSE
ENSECAG00000017149	ZC3H15	zinc finger CCCH-type containing 15	845.399	0.207465	0.844459	0.245678	0.805932	0.999108	FALSE
ENSECAG00000018533	SALL4	spalt like transcription factor 4	320.846	0.207562	1.13179	0.183393	0.85449	0.999108	FALSE
ENSECAG00000017756	SRSF11	serine and arginine rich splicing factor 11	2701.39	0.208549	0.478024	0.436274	0.662638	0.999108	FALSE
ENSECAG00000018581			64.3591	0.210151	1.48749	0.141279	0.88765	0.999108	FALSE
ENSECAG00000020181	AKAP9	A-kinase anchoring protein 9	2182.09	0.211114	0.636595	0.33163	0.740169	0.999108	FALSE
ENSECAG00000000466	ELL	elongation factor for RNA polymerase II	222.841	0.211863	1.46336	0.144779	0.884885	0.999108	FALSE
ENSECAG00000005250	STARD3NL	STARD3 N-terminal like	486.277	0.212675	0.984494	0.216025	0.828968	0.999108	FALSE
ENSECAG00000006400	TOX4	TOX high mobility group box family member 4	1378.12	0.213393	0.578563	0.368832	0.712253	0.999108	FALSE
ENSECAG00000002113	BARD1	BRCA1 associated RING domain 1	903.16	0.214282	0.914873	0.23422	0.814814	0.999108	FALSE
ENSECAG00000010315	MSH2	mutS homolog 2	171.914	0.214904	1.48751	0.144472	0.885128	0.999108	FALSE
ENSECAG00000011120	THRA	thyroid hormone receptor alpha	151.469	0.215177	1.44461	0.148952	0.881592	0.999108	FALSE
ENSECAG00000009841	AKAP1	A-kinase anchoring protein 1	820.026	0.215671	0.746489	0.288913	0.772648	0.999108	FALSE
ENSECAG00000003655			931.84	0.216581	0.576282	0.375825	0.707047	0.999108	FALSE
ENSECAG00000007816	WDR47	WD repeat domain 47	2330.56	0.216612	0.523891	0.413468	0.679264	0.999108	FALSE
ENSECAG00000015865	GLUL	glutamate-ammonia ligase	22923	0.216701	0.469201	0.461851	0.644188	0.999108	FALSE
ENSECAG00000023644	PPAT	phosphoribosyl pyrophosphate amidotransferase	981.602	0.217098	0.927798	0.233993	0.814991	0.999108	FALSE
ENSECAG00000007671	ATP2A2	ATPase sarcoplasmic/endoplasmic reticulum Ca2+ transporting 2	354.114	0.217269	1.04109	0.208694	0.834687	0.999108	FALSE
ENSECAG00000017581	CYB5A	cytochrome b5 type A	679.659	0.217376	0.751509	0.289252	0.772388	0.999108	FALSE
ENSECAG00000010845	RASA2	RAS p21 protein activator 2	388.02	0.219525	1.23444	0.177833		1	FALSE
ENSECAG00000012898	PNLDC1	PARN like ribonuclease domain containing exonuclease 1	1085.48	0.220484	0.873014	0.252555	0.800612	0.999108	FALSE
ENSECAG00000037526	COX17	cytochrome c oxidase copper chaperone COX17	270.353	0.220738	1.01543	0.217385	0.827908	0.999108	FALSE
ENSECAG00000042596			39.9127	0.222275	2.00134	0.111063	0.911566	0.999108	FALSE
ENSECAG00000010837	MAP3K12	mitogen-activated protein kinase kinase kinase 12	435.011	0.223272	1.06611	0.209427	0.834115	0.999108	FALSE
ENSECAG00000023505	HECTD1	HECT domain E3 ubiquitin protein ligase 1	672.172	0.223536	0.97205	0.229963	0.81812	0.999108	FALSE
ENSECAG00000008147	ING3	inhibitor of growth family member 3	10542.2	0.223659	0.473425	0.472427	0.636622	0.999108	FALSE
ENSECAG00000031442	FGF16	fibroblast growth factor 16	646.003	0.223795	0.63283	0.353641	0.723608	0.999108	FALSE
ENSECAG00000015215			1544.95	0.224073	0.588489	0.38076	0.703382	0.999108	FALSE
ENSECAG00000017645			447.133	0.225864	0.873093	0.258694	0.795871	0.999108	FALSE
ENSECAG00000013139	CACUL1	CDK2 associated cullin domain 1	863.214	0.22598	0.717631	0.314897	0.75284	0.999108	FALSE
ENSECAG00000032748	NOL12	nucleolar protein 12	303.015	0.226083	1.59504	0.141741	0.887284	0.999108	FALSE
ENSECAG00000009730	SAR1A	secretion associated Ras related GTPase 1A	3457.85	0.227069	0.513668	0.442054	0.65845	0.999108	FALSE
ENSECAG00000013510			350.88	0.227564	0.919439	0.247503	0.804519	0.999108	FALSE
ENSECAG00000005590	FAM118B	family with sequence similarity 118 member B	541.497	0.228081	0.73644	0.309708	0.756783	0.999108	FALSE
ENSECAG00000016772	NANS	N-acetylneuraminate synthase	2198.24	0.228641	0.544723	0.419737	0.674677	0.999108	FALSE
ENSECAG00000018425	DTX2	deltex E3 ubiquitin ligase 2	954.699	0.2297	0.914697	0.251121	0.80172	0.999108	FALSE
ENSECAG00000008895	SRP19	signal recognition particle 19	520.597	0.230807	0.761306	0.303172	0.761759	0.999108	FALSE
ENSECAG00000000053	AIMP2	aminoacyl tRNA synthetase complex interacting multifunctional protein 2	1287.91	0.232644	0.896633	0.259464	0.795277	0.999108	FALSE
ENSECAG00000009667	EAPP	E2F associated phosphoprotein	690.58	0.23423	0.770155	0.304134	0.761026	0.999108	FALSE
ENSECAG00000006788	PCSK5	proprotein convertase subtilisin/kexin type 5	351.602	0.234443	1.25132	0.187357	0.851381	0.999108	FALSE
ENSECAG00000023018	DRGX	dorsal root ganglia homeobox	1054.04	0.235722	0.855561	0.275517	0.782919	0.999108	FALSE
ENSECAG00000025162	ATP5F1E	ATP synthase F1 subunit epsilon	73.4718	0.237095	1.68251	0.140917	0.887935	0.999108	FALSE
ENSECAG00000024860	MAP3K5	mitogen-activated protein kinase kinase kinase 5	360.261	0.239039	1.27033	0.188171	0.850742	0.999108	FALSE
ENSECAG00000026864	CNBD1	cyclic nucleotide binding domain containing 1	559.693	0.240319	1.11199	0.216116	0.828898	0.999108	FALSE
ENSECAG00000016187	FAM114A2	family with sequence similarity 114 member A2	187.268	0.240968	1.66445	0.144773	0.88489	0.999108	FALSE
ENSECAG00000024527	MRPL35	mitochondrial ribosomal protein L35	993.273	0.24161	0.726624	0.332511	0.739504	0.999108	FALSE
ENSECAG00000021686	SUPT16H	SPT16 homolog, facilitates chromatin remodeling subunit	126.287	0.242072	1.5387	0.157323	0.874991	0.999108	FALSE
ENSECAG00000019817	SNRPF	small nuclear ribonucleoprotein polypeptide F	1523.02	0.242301	0.579607	0.418044	0.675915	0.999108	FALSE
ENSECAG00000009463	CCDC15	coiled-coil domain containing 15	620.44	0.245879	0.841228	0.292285	0.770069	0.999108	FALSE
ENSECAG00000022270	INTS3	integrator complex subunit 3	237.903	0.247929	1.05406	0.235213	0.814043	0.999108	FALSE
ENSECAG00000011599	ZC3H18	zinc finger CCCH-type containing 18	1195.12	0.247991	0.855408	0.289909	0.771886	0.999108	FALSE
ENSECAG00000009507			393.88	0.248113	1.06885	0.232131	0.816436	0.999108	FALSE
ENSECAG00000018789	RALBP1	ralA binding protein 1	5282.48	0.248275	0.480644	0.516547	0.605472	0.999108	FALSE
ENSECAG00000019369	CCNF	cyclin F	450.732	0.249339	0.899911	0.27707	0.781726	0.999108	FALSE
ENSECAG00000020822	DIAPH1	diaphanous related formin 1	377.368	0.250544	0.991635	0.252657	0.800533	0.999108	FALSE
ENSECAG00000019772	PTPN1	protein tyrosine phosphatase non-receptor type 1	2416.85	0.251159	0.500577	0.501738	0.615852	0.999108	FALSE
ENSECAG00000000784	ESRP1	epithelial splicing regulatory protein 1	1668.93	0.251166	0.663813	0.378369	0.705157	0.999108	FALSE
ENSECAG00000021868	NCL	nucleolin	975.192	0.251346	0.657163	0.382471	0.702112	0.999108	FALSE
ENSECAG00000024311	BANF1	BAF nuclear assembly factor 1	131.269	0.252089	1.15172	0.218881	0.826742	0.999108	FALSE
ENSECAG00000016127	CLPX	caseinolytic mitochondrial matrix peptidase chaperone subunit X	294.891	0.252382	1.32552	0.190402	0.848994	0.999108	FALSE
ENSECAG00000020667	PRPF31	pre-mRNA processing factor 31	162.761	0.253119	1.69428	0.149396	0.881241	0.999108	FALSE
ENSECAG00000008833	SPEN	spen family transcriptional repressor	269.5	0.253658	1.52863	0.165938	0.868206	0.999108	FALSE
ENSECAG00000012725	RNF10	ring finger protein 10	1476.17	0.253938	0.589095	0.431064	0.666422	0.999108	FALSE
ENSECAG00000010938	CEP57	centrosomal protein 57	4139.24	0.255834	0.493677	0.518221	0.604304	0.999108	FALSE
ENSECAG00000019106	IQCB1	IQ motif containing B1	2710.73	0.255838	0.5971	0.428468	0.668311	0.999108	FALSE
ENSECAG00000002887	H1-1	H1.1 linker histone, cluster member	2376.32	0.256044	0.543102	0.471448	0.637321	0.999108	FALSE
ENSECAG00000023179	RPL4	ribosomal protein L4	1733.07	0.257903	0.537906	0.479457	0.631614	0.999108	FALSE
ENSECAG00000012770	ALDH9A1	aldehyde dehydrogenase 9 family member A1	1022.2	0.25813	0.88283	0.292389	0.769989	0.999108	FALSE
ENSECAG00000018923	RBFOX2	RNA binding fox-1 homolog 2	819.415	0.259166	1.11505	0.232425	0.816208	0.999108	FALSE
ENSECAG00000040578	FAM219B	family with sequence similarity 219 member B	133.407	0.25937	1.7328	0.149683	0.881015	0.999108	FALSE
ENSECAG00000020397	YWHAB	tyrosine 3-monooxygenase/tryptophan 5-monooxygenase activation protein beta	1998.35	0.2594	0.496476	0.522483	0.601334	0.999108	FALSE
ENSECAG00000020447	RBM5	RNA binding motif protein 5	344.871	0.261136	1.2496	0.208975	0.834468	0.999108	FALSE
ENSECAG00000014323	SKA3	spindle and kinetochore associated complex subunit 3	317.414	0.261916	1.24915	0.209675	0.833921	0.999108	FALSE
ENSECAG00000020997	TFB1M	transcription factor B1, mitochondrial	350.469	0.262779	1.27432	0.206212	0.836626	0.999108	FALSE
ENSECAG00000017526	MSI1	musashi RNA binding protein 1	555.433	0.263672	0.943075	0.279588	0.779794	0.999108	FALSE
ENSECAG00000031940			141.321	0.264615	1.19684	0.221094	0.825019	0.999108	FALSE
ENSECAG00000001110			1748.81	0.264784	0.516344	0.512805	0.608088	0.999108	FALSE
ENSECAG00000007050	WDR7	WD repeat domain 7	219.352	0.265512	1.57498	0.168581	0.866126	0.999108	FALSE
ENSECAG00000039203	SOX4	SRY-box transcription factor 4	5006.88	0.265985	0.461965	0.57577	0.564771	0.999108	FALSE
ENSECAG00000005178	CCSAP	centriole, cilia and spindle associated protein	2540.73	0.266216	0.576168	0.462045	0.644049	0.999108	FALSE
ENSECAG00000014373	SNRPD1	small nuclear ribonucleoprotein D1 polypeptide	464.265	0.266624	0.960903	0.277473	0.781417	0.999108	FALSE
ENSECAG00000015579	TMEM14A	transmembrane protein 14A	103.275	0.267701	1.71316	0.156262	0.875827	0.999108	FALSE
ENSECAG00000024602	RNF111	ring finger protein 111	1329.58	0.268846	0.684998	0.392477	0.694706	0.999108	FALSE
ENSECAG00000032167	GNG12	G protein subunit gamma 12	49.9784	0.269246	1.98441	0.13568	0.892074	0.999108	FALSE
ENSECAG00000018642	PRICKLE2	prickle planar cell polarity protein 2	271.688	0.271385	1.2037	0.225459	0.821622	0.999108	FALSE
ENSECAG00000015423	PRDM4	PR/SET domain 4	120.652	0.272297	1.64903	0.165126	0.868845	0.999108	FALSE
ENSECAG00000007234	SPATA2	spermatosis associated 2	423.563	0.272577	1.03049	0.264511	0.791386	0.999108	FALSE
ENSECAG00000016020	CCNJ	cyclin J	427.465	0.272688	0.94184	0.289527	0.772178	0.999108	FALSE
ENSECAG00000016647	UBE2Q1	ubiquitin conjugating enzyme E2 Q1	249.657	0.273795	1.28634	0.212847	0.831446	0.999108	FALSE
ENSECAG00000023501	WNK1	WNK lysine deficient protein kinase 1	1683.91	0.274006	0.542895	0.504712	0.613761	0.999108	FALSE
ENSECAG00000000631	TPP2	tripeptidyl peptidase 2	584.322	0.274127	1.09393	0.25059	0.802131	0.999108	FALSE
ENSECAG00000019894	RBMS1	RNA binding motif single stranded interacting protein 1	970.086	0.274332	0.678114	0.404551	0.685807	0.999108	FALSE
ENSECAG00000000018	KANSL1L	KAT8 regulatory NSL complex subunit 1 like	211.785	0.275138	1.63337	0.168448	0.866231	0.999108	FALSE
ENSECAG00000007825	CALCA	calcitonin-related polypeptide alpha	256.769	0.275166	1.5346	0.179308	0.857696	0.999108	FALSE
ENSECAG00000010723	ANGEL2	angel homolog 2	342.561	0.276918	1.25344	0.220926	0.82515	0.999108	FALSE
ENSECAG00000016639	ADAD1	adenosine deaminase domain containing 1	597.663	0.279079	1.07964	0.258492	0.796027	0.999108	FALSE
ENSECAG00000011582	DLGAP4	DLG associated protein 4	534.437	0.279183	0.882125	0.316489	0.751631	0.999108	FALSE
ENSECAG00000021243	PTBP3	polypyrimidine tract binding protein 3	575.857	0.279189	0.778158	0.358782	0.719758	0.999108	FALSE
ENSECAG00000007182	ORC6	origin recognition complex subunit 6	46.5991	0.279836	1.91605	0.146049	0.883883	0.999108	FALSE
ENSECAG00000021598	ZFAND2A	zinc finger AN1-type containing 2A	1125.32	0.281788	0.724534	0.388924	0.697333	0.999108	FALSE
ENSECAG00000024048	TIPARP	TCDD inducible poly(ADP-ribose) polymerase	1003.11	0.281806	0.688816	0.409116	0.682454	0.999108	FALSE
ENSECAG00000009635	CDC27	cell division cycle 27	715.668	0.283705	0.964906	0.294023	0.76874	0.999108	FALSE
ENSECAG00000010450	CCDC59	coiled-coil domain containing 59	1818.49	0.284583	0.464462	0.612716	0.540064	0.999108	FALSE
ENSECAG00000006587	RWDD1	RWD domain containing 1	1644.46	0.284688	0.496541	0.573342	0.566413	0.999108	FALSE
ENSECAG00000010678	LIN37	lin-37 DREAM MuvB core complex component	101.143	0.286492	1.91237	0.14981	0.880914	0.999108	FALSE
ENSECAG00000009472	CLSPN	claspin	1235.58	0.288686	0.765577	0.377083	0.706112	0.999108	FALSE
ENSECAG00000020475	MIER1	MIER1 transcriptional regulator	1173.23	0.288822	0.757806	0.381129	0.703107	0.999108	FALSE
ENSECAG00000020669	LDHA	lactate dehydrogenase A	861.905	0.288849	0.822278	0.351279	0.725379	0.999108	FALSE
ENSECAG00000032774			233.307	0.288952	1.16444	0.248148	0.80402	0.999108	FALSE
ENSECAG00000000102	EIF5B	eukaryotic translation initiation factor 5B	17980.4	0.289985	0.441037	0.657507	0.510855	0.999108	FALSE
ENSECAG00000016551	RAB13	RAB13, member RAS onco family	80.0419	0.290221	1.65256	0.17562	0.860593	0.999108	FALSE
ENSECAG00000022109	NUB1	negative regulator of ubiquitin like proteins 1	1672.09	0.290658	0.771752	0.376621	0.706455	0.999108	FALSE
ENSECAG00000001088	LARP1B	La ribonucleoprotein 1B	547.887	0.290672	1.05781	0.274787	0.78348	0.999108	FALSE
ENSECAG00000010731	DCLRE1A	DNA cross-link repair 1A	1301.82	0.291093	0.723505	0.402337	0.687436	0.999108	FALSE
ENSECAG00000007520	BBS5	Bardet-Biedl syndrome 5	363.364	0.291385	1.21588	0.239649	0.810602	0.999108	FALSE
ENSECAG00000012019	SETX	senataxin	870.339	0.292083	1.15574	0.252725	0.800481	0.999108	FALSE
ENSECAG00000017640	ILF3	interleukin enhancer binding factor 3	3062.01	0.292371	0.492824	0.593256	0.55301	0.999108	FALSE
ENSECAG00000022246	PIP4K2B	phosphatidylinositol-5-phosphate 4-kinase type 2 beta	132.39	0.292891	1.68184	0.174149	0.861748	0.999108	FALSE
ENSECAG00000012229	BIRC3	baculoviral IAP repeat containing 3	426.148	0.29338	0.93233	0.314674	0.753009	0.999108	FALSE
ENSECAG00000022400	CDCA7L	cell division cycle associated 7 like	1218.52	0.296054	0.724195	0.408804	0.682684	0.999108	FALSE
ENSECAG00000019415	FIP1L1	factor interacting with PAPOLA and CPSF1	3475.15	0.296221	0.429577	0.689565	0.490468	0.999108	FALSE
ENSECAG00000015924	CTCF	CCCTC-binding factor	5930.36	0.297506	0.384478	0.773791	0.439054	0.999108	FALSE
ENSECAG00000033534			18.5101	0.298664	2.37773	0.125609	0.900042	0.999108	FALSE
ENSECAG00000013268	AP1S3	adaptor related protein complex 1 subunit sigma 3	287.958	0.299013	1.36363	0.219278	0.826434	0.999108	FALSE
ENSECAG00000000266	RYBP	RING1 and YY1 binding protein	460.924	0.299668	0.682782	0.438892	0.66074	0.999108	FALSE
ENSECAG00000021039	KMT5A	lysine methyltransferase 5A	218.332	0.299756	1.47614	0.203068	0.839082	0.999108	FALSE
ENSECAG00000012882	MATR3	matrin 3	949.613	0.301083	0.539077	0.558515	0.576493	0.999108	FALSE
ENSECAG00000001468	VBP1	VHL binding protein 1	1794.52	0.3014	0.574212	0.524893	0.599658	0.999108	FALSE
ENSECAG00000014496	PPP2R3A	protein phosphatase 2 regulatory subunit B''alpha	183.201	0.302239	1.72511	0.175199	0.860923	0.999108	FALSE
ENSECAG00000010489	BRMS1	BRMS1 transcriptional repressor and anoikis regulator	116.335	0.302265	1.65446	0.182697	0.855036	0.999108	FALSE
ENSECAG00000012588	DTNBP1	dystrobrevin binding protein 1	326.772	0.302985	1.24607	0.243152	0.807888	0.999108	FALSE
ENSECAG00000016144	GPN3	GPN-loop GTPase 3	358.314	0.304037	1.36227	0.223184	0.823392	0.999108	FALSE
ENSECAG00000039947	VGLL4	vestigial like family member 4	1507.95	0.304308	0.560385	0.543033	0.587107	0.999108	FALSE
ENSECAG00000000008	RPLP2	ribosomal protein lateral stalk subunit P2	290.945	0.304549	1.18586	0.256817	0.79732	0.999108	FALSE
ENSECAG00000008786	OSBP	oxysterol binding protein	213.582	0.305737	1.50305	0.20341	0.838814	0.999108	FALSE
ENSECAG00000040232	GPATCH8	G-patch domain containing 8	898.05	0.30641	0.597872	0.512502	0.6083	0.999108	FALSE
ENSECAG00000024811	TSC22D2	TSC22 domain family member 2	373.874	0.306861	1.4691	0.208878	0.834544	0.999108	FALSE
ENSECAG00000023082	HACD3	3-hydroxyacyl-CoA dehydratase 3	1010.59	0.309386	0.806201	0.383758	0.701158	0.999108	FALSE
ENSECAG00000013901	ANKRD12	ankyrin repeat domain 12	5082.18	0.309976	0.493855	0.627666	0.530223	0.999108	FALSE
ENSECAG00000017076	NSRP1	nuclear speckle splicing regulatory protein 1	1461.52	0.31027	0.571867	0.542557	0.587435	0.999108	FALSE
ENSECAG00000012176	SNX6	sorting nexin 6	503.577	0.311379	1.1761	0.264756	0.791197	0.999108	FALSE
ENSECAG00000024653	GGNBP2	gametotin binding protein 2	6440.14	0.312176	0.512239	0.609434	0.542237	0.999108	FALSE
ENSECAG00000033238	H3-3B	H3.3 histone B	652.848	0.312414	0.628645	0.496965	0.619214	0.999108	FALSE
ENSECAG00000017561	PRR7	proline rich 7, synaptic	145.634	0.313391	1.35981	0.230467	0.817729	0.999108	FALSE
ENSECAG00000009719	EBAG9	estrogen receptor binding site associated antigen 9	741.533	0.313863	0.594489	0.527954	0.597531	0.999108	FALSE
ENSECAG00000021186	FHOD3	formin homology 2 domain containing 3	1467.31	0.314667	0.682002	0.461388	0.644521	0.999108	FALSE
ENSECAG00000021225	MPRIP	myosin phosphatase Rho interacting protein	274.912	0.315699	1.32212	0.238783	0.811274	0.999108	FALSE
ENSECAG00000020218	DYNC1LI2	dynein cytoplasmic 1 light intermediate chain 2	3695.43	0.315861	0.505402	0.62497	0.531991	0.999108	FALSE
ENSECAG00000013147	SKP2	S-phase kinase associated protein 2	713.712	0.316473	0.84111	0.376257	0.706726	0.999108	FALSE
ENSECAG00000018538	PPIG	peptidylprolyl isomerase G	1571.47	0.316967	0.601415	0.527036	0.598168	0.999108	FALSE
ENSECAG00000003357	ING1	inhibitor of growth family member 1	160.798	0.319289	1.71674	0.185986	0.852456	0.999108	FALSE
ENSECAG00000014738	IBTK	inhibitor of Bruton tyrosine kinase	170.616	0.319559	1.51226	0.211312	0.832644	0.999108	FALSE
ENSECAG00000018348	TPT1	tumor protein, translationally-controlled 1	1151.96	0.319815	0.723368	0.442119	0.658403	0.999108	FALSE
ENSECAG00000038523	ADH5	alcohol dehydrogenase 5 (class III), chi polypeptide	196.477	0.320302	1.19869	0.26721	0.789307	0.999108	FALSE
ENSECAG00000022855	IST1	IST1 factor associated with ESCRT-III	152.171	0.326547	1.52806	0.213701	0.83078	0.999108	FALSE
ENSECAG00000002280	ZFP91	ZFP91 zinc finger protein, atypical E3 ubiquitin ligase	824.732	0.326723	0.791489	0.412796	0.679756	0.999108	FALSE
ENSECAG00000019479	SFT2D1	SFT2 domain containing 1	143.249	0.32786	1.0901	0.30076	0.763598	0.999108	FALSE
ENSECAG00000000909	CSPP1	centrosome and spindle pole associated protein 1	1835.57	0.328784	0.511239	0.643113	0.520151	0.999108	FALSE
ENSECAG00000026942			13069.3	0.329585	0.446982	0.737357	0.460905	0.999108	FALSE
ENSECAG00000016641	NBAS	NBAS subunit of NRZ tethering complex	734.1	0.330349	1.16529	0.28349	0.776801	0.999108	FALSE
ENSECAG00000020900	CEP95	centrosomal protein 95	293.063	0.330507	1.62215	0.203746	0.838552	0.999108	FALSE
ENSECAG00000033089			15219.8	0.330817	0.406445	0.813927	0.415687	0.999108	FALSE
ENSECAG00000001674	ZSWIM3	zinc finger SWIM-type containing 3	345.55	0.331384	1.1599	0.285702	0.775107	0.999108	FALSE
ENSECAG00000023732	H2AZ1	H2A.Z histone 1	480.022	0.331968	0.977079	0.339756	0.73404	0.999108	FALSE
ENSECAG00000024277	HLTF	helicase like transcription factor	538.305	0.338479	0.913215	0.370645	0.710902	0.999108	FALSE
ENSECAG00000020871	SENP3	SUMO specific peptidase 3	92.8618	0.338998	1.76961	0.191567	0.848081	0.999108	FALSE
ENSECAG00000014051	MED19	mediator complex subunit 19	2468.82	0.339794	0.545061	0.623405	0.533018	0.999108	FALSE
ENSECAG00000009335	DNAJC3	DnaJ heat shock protein family (Hsp40) member C3	1822.61	0.340323	1.01494	0.335313	0.737389	0.999108	FALSE
ENSECAG00000012826	CDO1	cysteine dioxygenase type 1	738.352	0.341195	0.61298	0.556617	0.577789	0.999108	FALSE
ENSECAG00000042476			8837.66	0.341613	0.417233	0.818758	0.412925	0.999108	FALSE
ENSECAG00000011807	RAF1	Raf-1 proto-onco, serine/threonine kinase	196.926	0.341744	1.36757	0.249891	0.802671	0.999108	FALSE
ENSECAG00000042507			33.1562	0.342073	1.89397	0.180611	0.856673	0.999108	FALSE
ENSECAG00000018838	CCDC183	coiled-coil domain containing 183	665.178	0.342641	0.870218	0.393741	0.693772	0.999108	FALSE
ENSECAG00000015107	PHF20L1	PHD finger protein 20 like 1	3245.8	0.342837	0.530539	0.646205	0.518147	0.999108	FALSE
ENSECAG00000022152	CACHD1	cache domain containing 1	152.349	0.343244	1.4719	0.233198	0.815607	0.999108	FALSE
ENSECAG00000018697	PIAS4	protein inhibitor of activated STAT 4	3884.52	0.345281	0.535078	0.645291	0.518739	0.999108	FALSE
ENSECAG00000018648	NHLRC2	NHL repeat containing 2	228.779	0.345853	1.43813	0.240488	0.809952	0.999108	FALSE
ENSECAG00000015806	CCNB1	cyclin B1	2851.36	0.345947	0.472357	0.732385	0.463934	0.999108	FALSE
ENSECAG00000032782	UBE2D1	ubiquitin conjugating enzyme E2 D1	739.399	0.34657	0.781084	0.443704	0.657257	0.999108	FALSE
ENSECAG00000019336	UBN1	ubinuclein 1	338.112	0.347453	0.869283	0.399701	0.689377	0.999108	FALSE
ENSECAG00000006875	IP6K2	inositol hexakisphosphate kinase 2	104.309	0.347778	1.83237	0.189797	0.849468	0.999108	FALSE
ENSECAG00000003702			77.4235	0.350198	1.8631	0.187966	0.850904	0.999108	FALSE
ENSECAG00000013046	ZBTB21	zinc finger and BTB domain containing 21	138.476	0.352891	1.50994	0.233712	0.815208	0.999108	FALSE
ENSECAG00000017771	ATP1B1	ATPase Na+/K+ transporting subunit beta 1	1976.49	0.353369	0.52785	0.66945	0.503209	0.999108	FALSE
ENSECAG00000016480	SPCS3	signal peptidase complex subunit 3	213.277	0.354861	1.50778	0.235353	0.813935	0.999108	FALSE
ENSECAG00000007573	DNAJC2	DnaJ heat shock protein family (Hsp40) member C2	1716.62	0.35555	0.515277	0.690017	0.490184	0.999108	FALSE
ENSECAG00000020625	MTMR14	myotubularin related protein 14	764.439	0.355742	0.633451	0.561595	0.574392	0.999108	FALSE
ENSECAG00000014746	DEPDC5	DEP domain containing 5, GATOR1 subcomplex subunit	125.585	0.35618	1.73462	0.205337		1	FALSE
ENSECAG00000026810	FAM133B	family with sequence similarity 133 member B	613.356	0.356543	0.786158	0.453526	0.65017	0.999108	FALSE
ENSECAG00000021276	BRD3	bromodomain containing 3	1275.64	0.357259	0.618483	0.577639	0.563508	0.999108	FALSE
ENSECAG00000042343			28.6922	0.35731	1.90651	0.187416	0.851334	0.999108	FALSE
ENSECAG00000013735	HPF1	histone PARylation factor 1	17219.5	0.358388	0.369	0.971241	0.331429	0.999108	FALSE
ENSECAG00000005510	GPR3	G protein-coupled receptor 3	900.977	0.358804	0.734594	0.488439	0.625239	0.999108	FALSE
ENSECAG00000024604	ELF1	E74 like ETS transcription factor 1	953.919	0.35935	0.800685	0.448804	0.653573	0.999108	FALSE
ENSECAG00000020563	PIM1	Pim-1 proto-onco, serine/threonine kinase	2109.85	0.360365	0.620108	0.581132	0.561151	0.999108	FALSE
ENSECAG00000011243	NCOA6	nuclear receptor coactivator 6	204.617	0.361045	1.67798	0.215167	0.829637	0.999108	FALSE
ENSECAG00000024607	RAD23A	RAD23 homolog A, nucleotide excision repair protein	1495.45	0.361593	0.516851	0.699607	0.484173	0.999108	FALSE
ENSECAG00000026912	CENPH	centromere protein H	709.263	0.362363	0.68406	0.529725	0.596303	0.999108	FALSE
ENSECAG00000010661			272.107	0.36276	1.09088	0.33254	0.739482	0.999108	FALSE
ENSECAG00000024341	MAZ	MYC associated zinc finger protein	6004.99	0.363901	0.494029	0.736598	0.461367	0.999108	FALSE
ENSECAG00000025005	BCL10	BCL10 immune signaling adaptor	686.033	0.364783	0.930475	0.39204	0.695029	0.999108	FALSE
ENSECAG00000012962	SAMD12	sterile alpha motif domain containing 12	248.78	0.367383	1.31847	0.278643	0.780519	0.999108	FALSE
ENSECAG00000023776	TTK	TTK protein kinase	834.325	0.368244	0.892252	0.412713	0.679817	0.999108	FALSE
ENSECAG00000011763	AHSA1	activator of HSP90 ATPase activity 1	748.687	0.368332	0.6296	0.585026	0.55853	0.999108	FALSE
ENSECAG00000021968	SAT1	spermidine/spermine N1-acetyltransferase 1	168.498	0.368565	1.28913	0.285903	0.774952	0.999108	FALSE
ENSECAG00000014072	PMS2	PMS1 homolog 2, mismatch repair system component	255.785	0.369038	1.48072	0.249229	0.803184	0.999108	FALSE
ENSECAG00000006769	TTC1	tetratricopeptide repeat domain 1	540.498	0.369298	0.983241	0.375592	0.70722	0.999108	FALSE
ENSECAG00000022635	HERC1	HECT and RLD domain containing E3 ubiquitin protein ligase family member 1	437.012	0.370243	1.2979	0.285263	0.775443	0.999108	FALSE
ENSECAG00000011027	CFAP20	cilia and flagella associated protein 20	168.865	0.370563	0.9926	0.373325	0.708906	0.999108	FALSE
ENSECAG00000025036	RSL1D1	ribosomal L1 domain containing 1	1521.6	0.376551	0.808807	0.465564	0.641528	0.999108	FALSE
ENSECAG00000019228	UBLCP1	ubiquitin like domain containing CTD phosphatase 1	203.301	0.376586	1.38872	0.271174	0.786257	0.999108	FALSE
ENSECAG00000015008	BRI3BP	BRI3 binding protein	797.469	0.378529	0.940852	0.402325	0.687445	0.999108	FALSE
ENSECAG00000011196	PADI4	peptidyl arginine deiminase 4	288.836	0.378703	1.40847	0.268875	0.788026	0.999108	FALSE
ENSECAG00000000480	ABI3BP	ABI family member 3 binding protein	1337.39	0.379284	0.663545	0.571603	0.567591	0.999108	FALSE
ENSECAG00000000737	PRKAR1A	protein kinase cAMP-dependent type I regulatory subunit alpha	621.607	0.379368	0.618814	0.613055	0.53984	0.999108	FALSE
ENSECAG00000021986	HARS1	histidyl-tRNA synthetase 1	749.514	0.382746	1.1244	0.3404	0.733555	0.999108	FALSE
ENSECAG00000015959	MYBL1	MYB proto-onco like 1	563.334	0.382898	0.997123	0.384003	0.700977	0.999108	FALSE
ENSECAG00000014213	SRPK1	SRSF protein kinase 1	5798.69	0.382906	0.462101	0.82862	0.407319	0.999108	FALSE
ENSECAG00000024608	SREBF2	sterol regulatory element binding transcription factor 2	226.631	0.383182	1.46199	0.262097	0.793247	0.999108	FALSE
ENSECAG00000011111	FMNL2	formin like 2	602.772	0.384802	1.0264	0.374906	0.70773	0.999108	FALSE
ENSECAG00000009958	DUSP1	dual specificity phosphatase 1	155.982	0.386052	1.32173	0.292081	0.770225	0.999108	FALSE
ENSECAG00000016699	MSL3	MSL complex subunit 3	468.566	0.386776	0.931702	0.415128	0.678048	0.999108	FALSE
ENSECAG00000038550			481.344	0.388206	0.821453	0.472585	0.636509	0.999108	FALSE
ENSECAG00000023269	GMPS	guanine monophosphate synthase	496.525	0.389928	1.26934	0.307189	0.758699	0.999108	FALSE
ENSECAG00000012903	WDR76	WD repeat domain 76	728.019	0.391519	1.01368	0.386235	0.699323	0.999108	FALSE
ENSECAG00000017127	CENPO	centromere protein O	522.947	0.391822	0.950466	0.412242	0.680162	0.999108	FALSE
ENSECAG00000023364	C17orf49	chromosome 17 open reading frame 49	301.264	0.392199	1.20884	0.324443	0.745603	0.999108	FALSE
ENSECAG00000022984	ZFHX3	zinc finger homeobox 3	903.801	0.393156	0.840932	0.467524	0.640125	0.999108	FALSE
ENSECAG00000017953	TCP1	t-complex 1	361.419	0.393491	1.23961	0.31743	0.750917	0.999108	FALSE
ENSECAG00000009758	CCDC115	coiled-coil domain containing 115	78.1826	0.394603	1.82209	0.216567	0.828546	0.999108	FALSE
ENSECAG00000013845	HUS1	HUS1 checkpoint clamp component	447.23	0.395932	1.02774	0.385244	0.700057	0.999108	FALSE
ENSECAG00000013778	PINX1	PIN2 (TERF1) interacting telomerase inhibitor 1	2684.62	0.396096	0.482082	0.821636	0.411284	0.999108	FALSE
ENSECAG00000020071	XIAP	X-linked inhibitor of apoptosis	667.303	0.396476	0.912498	0.434496	0.663929	0.999108	FALSE
ENSECAG00000014432			23.7242	0.397135	1.99037	0.199528	0.841849	0.999108	FALSE
ENSECAG00000011612	SRRM2	serine/arginine repetitive matrix 2	1850.5	0.397148	0.52452	0.757165	0.448951	0.999108	FALSE
ENSECAG00000014268	KDM5B	lysine demethylase 5B	614.143	0.397566	1.07453	0.369989	0.711391	0.999108	FALSE
ENSECAG00000022269	CLK3	CDC like kinase 3	583.77	0.39803	1.28085	0.310754	0.755988	0.999108	FALSE
ENSECAG00000024990	SLC17A6	solute carrier family 17 member 6	108.411	0.399124	1.65759	0.240786	0.809721	0.999108	FALSE
ENSECAG00000019009	PPP2R5C	protein phosphatase 2 regulatory subunit B'gamma	66.5263	0.40026	1.8318	0.218507	0.827034	0.999108	FALSE
ENSECAG00000038682	MYL12A	myosin light chain 12A	1410.6	0.400659	0.691978	0.579005	0.562586	0.999108	FALSE
ENSECAG00000016082	HDAC1	histone deacetylase 1	225.565	0.400836	1.45172	0.276111	0.782463	0.999108	FALSE
ENSECAG00000001222	MRPL36	mitochondrial ribosomal protein L36	136.013	0.40084	1.48324	0.270247	0.786971	0.999108	FALSE
ENSECAG00000015499	XPC	XPC complex subunit, DNA damage recognition and repair factor	137.879	0.402349	1.57302	0.255781	0.79812	0.999108	FALSE
ENSECAG00000036672			1142.65	0.403164	0.699127	0.576668	0.564164	0.999108	FALSE
ENSECAG00000006859	TAOK3	TAO kinase 3	4795.66	0.40357	0.437384	0.92269	0.356169	0.999108	FALSE
ENSECAG00000008939	RBM17	RNA binding motif protein 17	735.401	0.403844	0.661912	0.610117	0.541784	0.999108	FALSE
ENSECAG00000011555	THOC3	THO complex 3	92.1042	0.403879	1.82115	0.221771	0.824492	0.999108	FALSE
ENSECAG00000009583	P4HB	prolyl 4-hydroxylase subunit beta	1835.31	0.405041	0.566013	0.715605	0.474235	0.999108	FALSE
ENSECAG00000023985	MTRES1	mitochondrial transcription rescue factor 1	375.825	0.405052	0.861023	0.470431	0.638047	0.999108	FALSE
ENSECAG00000019655	SVBP	small vasohibin binding protein	87.9021	0.406885	1.44541	0.281502	0.778325	0.999108	FALSE
ENSECAG00000009379	GLCCI1	glucocorticoid induced 1	299.424	0.406929	0.837994	0.485599	0.627252	0.999108	FALSE
ENSECAG00000041724	UBL5	ubiquitin like 5	91.42	0.407762	1.54639	0.263686	0.792022	0.999108	FALSE
ENSECAG00000020935	PDCD4	programmed cell death 4	3826.54	0.408366	0.493122	0.828124	0.4076	0.999108	FALSE
ENSECAG00000020188	CNN3	calponin 3	509.159	0.410162	0.798066	0.513945		1	FALSE
ENSECAG00000016016	GNPDA2	glucosamine-6-phosphate deaminase 2	229.929	0.41133	1.28565	0.31994	0.749014	0.999108	FALSE
ENSECAG00000006452	YWHAG	tyrosine 3-monooxygenase/tryptophan 5-monooxygenase activation protein gamma	65.5407	0.41216	2.02127	0.203911		1	FALSE
ENSECAG00000006773	CIR1	corepressor interacting with RBPJ, CIR1	666.91	0.412241	1.02341	0.402813	0.687086	0.999108	FALSE
ENSECAG00000009163	NUF2	NUF2 component of NDC80 kinetochore complex	1176.04	0.412722	0.983989	0.419437	0.674896	0.999108	FALSE
ENSECAG00000042692			766.899	0.413092	0.843009	0.490021	0.624119	0.999108	FALSE
ENSECAG00000042533	SELENOH	selenoprotein H	312.647	0.413295	1.33149	0.3104	0.756257	0.999108	FALSE
ENSECAG00000023592	YBX1	Y-box binding protein 1	2073.88	0.413743	0.487251	0.849137	0.395805	0.999108	FALSE
ENSECAG00000018727	EFCAB11	EF-hand calcium binding domain 11	99.1151	0.414906	1.8099	0.229242	0.81868	0.999108	FALSE
ENSECAG00000005528	NSA2	NSA2 ribosome biosis factor	1423.58	0.415447	0.635728	0.653498	0.513436	0.999108	FALSE
ENSECAG00000009967	PHAX	phosphorylated adaptor for RNA export	519.667	0.416475	0.651403	0.63935	0.522595	0.999108	FALSE
ENSECAG00000022601	PARP12	poly(ADP-ribose) polymerase family member 12	63791.8	0.41751	0.39622	1.05373	0.292006	0.999108	FALSE
ENSECAG00000018736	MRAS	muscle RAS onco homolog	2717.46	0.419196	0.549971	0.762215	0.445932	0.999108	FALSE
ENSECAG00000014253	PMPCB	peptidase, mitochondrial processing subunit beta	595.186	0.4204	0.938938	0.447739	0.654341	0.999108	FALSE
ENSECAG00000010268	WASF2	WASP family member 2	786.409	0.420888	0.759821	0.553931	0.579626	0.999108	FALSE
ENSECAG00000014852	DUS4L	dihydrouridine synthase 4 like	1029.68	0.423578	0.605888	0.699103	0.484487	0.999108	FALSE
ENSECAG00000003460	CKS1B	CDC28 protein kinase regulatory subunit 1B	210.542	0.424835	1.14389	0.371397	0.710342	0.999108	FALSE
ENSECAG00000021238	IGF1R	insulin like growth factor 1 receptor	990.921	0.424968	0.621167	0.684146	0.493883	0.999108	FALSE
ENSECAG00000011835	PSMA5	proteasome 20S subunit alpha 5	1387.16	0.425129	0.88804	0.478727	0.632133	0.999108	FALSE
ENSECAG00000007156	EP400	E1A binding protein p400	330.174	0.426088	1.41667	0.300767	0.763592	0.999108	FALSE
ENSECAG00000022623	SNX9	sorting nexin 9	254.477	0.427907	1.62144	0.263906	0.791853	0.999108	FALSE
ENSECAG00000006904	H3-3A	H3.3 histone A	731.776	0.428081	0.617693	0.693031	0.48829	0.999108	FALSE
ENSECAG00000017034	FBXO30	F-box protein 30	897.088	0.42935	0.861864	0.498165	0.618368	0.999108	FALSE
ENSECAG00000017382	LRWD1	leucine rich repeats and WD repeat domain containing 1	211.802	0.429406	1.7911	0.239744		1	FALSE
ENSECAG00000021116			295.576	0.43014	0.922042	0.466507	0.640852	0.999108	FALSE
ENSECAG00000030680	SNRPE	small nuclear ribonucleoprotein polypeptide E	651.175	0.430366	0.614068	0.700844	0.4834	0.999108	FALSE
ENSECAG00000019423	FNDC3B	fibronectin type III domain containing 3B	1183.25	0.430407	0.658096	0.654018	0.5131	0.999108	FALSE
ENSECAG00000013565	DDX20	DEAD-box helicase 20	379.219	0.43159	1.32009	0.32694	0.743713	0.999108	FALSE
ENSECAG00000009676	SAP30	Sin3A associated protein 30	395.945	0.431831	0.916231	0.471312	0.637418	0.999108	FALSE
ENSECAG00000005758	EIF1B	eukaryotic translation initiation factor 1B	297.427	0.432919	0.864733	0.500638	0.616626	0.999108	FALSE
ENSECAG00000001650	DPF2	double PHD fingers 2	2612.47	0.433043	0.494304	0.876067	0.380994	0.999108	FALSE
ENSECAG00000009559	INSC	INSC spindle orientation adaptor protein	399.005	0.433589	1.1039	0.39278	0.694482	0.999108	FALSE
ENSECAG00000024519	SPC25	SPC25 component of NDC80 kinetochore complex	1192	0.433776	0.591707	0.733092	0.463502	0.999108	FALSE
ENSECAG00000023726	UBAP2	ubiquitin associated protein 2	603.836	0.434112	0.873165	0.49717	0.619069	0.999108	FALSE
ENSECAG00000012726	MRPL14	mitochondrial ribosomal protein L14	424.797	0.434276	1.12567	0.385792	0.699651	0.999108	FALSE
ENSECAG00000019897	DDX56	DEAD-box helicase 56	673.37	0.436377	1.00945	0.432291	0.66553	0.999108	FALSE
ENSECAG00000018625			92.0261	0.43682	1.34854	0.32392	0.745998	0.999108	FALSE
ENSECAG00000030336	ZAR1L	zygote arrest 1 like	665.248	0.437189	0.930269	0.46996	0.638384	0.999108	FALSE
ENSECAG00000019546	DDOST	dolichyl-diphosphooligosaccharide--protein glycosyltransferase non-catalytic subunit	164.04	0.438041	1.36411	0.32112	0.74812	0.999108	FALSE
ENSECAG00000018114	CEP295	centrosomal protein 295	683.698	0.439353	0.676813	0.649149	0.516242	0.999108	FALSE
ENSECAG00000020164	GAB2	GRB2 associated binding protein 2	153.65	0.440271	1.68786	0.260846	0.794211	0.999108	FALSE
ENSECAG00000037704	HSPA8	heat shock protein family A (Hsp70) member 8	706.922	0.440551	0.607233	0.725506	0.468142	0.999108	FALSE
ENSECAG00000022861	AGPAT3	1-acylglycerol-3-phosphate O-acyltransferase 3	172.896	0.440841	1.45293	0.303416	0.761573	0.999108	FALSE
ENSECAG00000013676	CAST	calpastatin	26707.9	0.440978	0.361423	1.22012	0.22242	0.999108	FALSE
ENSECAG00000014173	ZRANB2	zinc finger RANBP2-type containing 2	1324.05	0.443478	0.719797	0.616115	0.537819	0.999108	FALSE
ENSECAG00000013314	CWC15	CWC15 spliceosome associated protein homolog	3483.14	0.444016	0.506302	0.876979	0.380498	0.999108	FALSE
ENSECAG00000015046	TFAP2B	transcription factor AP-2 beta	1502.45	0.446712	0.719219	0.621106	0.53453	0.999108	FALSE
ENSECAG00000000624	PTPN2	protein tyrosine phosphatase non-receptor type 2	940.744	0.448705	0.946974	0.47383	0.635621	0.999108	FALSE
ENSECAG00000013631	SPOPL	speckle type BTB/POZ protein like	842.754	0.449126	0.777681	0.57752	0.563588	0.999108	FALSE
ENSECAG00000015322	PPP6R3	protein phosphatase 6 regulatory subunit 3	1907.1	0.449322	0.793327	0.566377	0.571137	0.999108	FALSE
ENSECAG00000010132	HMGB2	high mobility group box 2	2091.72	0.45254	0.446237	1.01413	0.310523	0.999108	FALSE
ENSECAG00000012224	PSMD12	proteasome 26S subunit, non-ATPase 12	737.845	0.452637	0.606079	0.746829	0.455167	0.999108	FALSE
ENSECAG00000036279	TMEM265	transmembrane protein 265	328.381	0.453294	1.27315	0.356042	0.721809	0.999108	FALSE
ENSECAG00000018610			403.521	0.454374	1.12776	0.402901	0.687021	0.999108	FALSE
ENSECAG00000020448	UBE2T	ubiquitin conjugating enzyme E2 T	1274.05	0.45472	0.958671	0.474323	0.63527	0.999108	FALSE
ENSECAG00000014264	TDP2	tyrosyl-DNA phosphodiesterase 2	407.418	0.455376	1.0566	0.430982	0.666482	0.999108	FALSE
ENSECAG00000019326	GRK3	G protein-coupled receptor kinase 3	212.68	0.45609	1.63386	0.279148	0.780131	0.999108	FALSE
ENSECAG00000033757			82.8114	0.456186	1.76899	0.257879	0.7965	0.999108	FALSE
ENSECAG00000000221	ETV5	ETS variant transcription factor 5	246.186	0.456486	1.2613	0.361916	0.717415	0.999108	FALSE
ENSECAG00000010746	RAD18	RAD18 E3 ubiquitin protein ligase	1047.71	0.457276	0.98623	0.463661	0.642891	0.999108	FALSE
ENSECAG00000011651	ICA1	islet cell autoantigen 1	271.427	0.45808	1.19585	0.383059	0.701676	0.999108	FALSE
ENSECAG00000021627	SLC16A1	solute carrier family 16 member 1	11028.2	0.458085	0.472059	0.970398	0.331848	0.999108	FALSE
ENSECAG00000010701	EIF6	eukaryotic translation initiation factor 6	239.375	0.458236	1.56694	0.29244	0.76995	0.999108	FALSE
ENSECAG00000024334	CARMIL1	capping protein regulator and myosin 1 linker 1	1910.2	0.45857	0.558945	0.820421	0.411976	0.999108	FALSE
ENSECAG00000008860			147.922	0.458611	1.15351	0.39758	0.69094	0.999108	FALSE
ENSECAG00000006991	PECAM1	platelet and endothelial cell adhesion molecule 1	493.036	0.459858	0.963423	0.477317	0.633137	0.999108	FALSE
ENSECAG00000024187	SMARCA2	SWI/SNF related, matrix associated, actin dependent regulator of chromatin, subfamily a, member 2	423.027	0.46095	0.896674	0.514066	0.607206	0.999108	FALSE
ENSECAG00000029550			685.824	0.46157	0.642463	0.718438	0.472487	0.999108	FALSE
ENSECAG00000021538	CKAP2L	cytoskeleton associated protein 2 like	353.661	0.462873	1.23492	0.374819	0.707795	0.999108	FALSE
ENSECAG00000017164	PPIB	peptidylprolyl isomerase B	186.772	0.462922	1.52972	0.302619	0.76218	0.999108	FALSE
ENSECAG00000015967	ASF1B	anti-silencing function 1B histone chaperone	78.3681	0.46311	1.82844	0.253281	0.800051	0.999108	FALSE
ENSECAG00000008152	CFAP300	cilia and flagella associated protein 300	80.8759	0.463175	1.85836	0.249239	0.803176	0.999108	FALSE
ENSECAG00000010149	EXOC3	exocyst complex component 3	404.32	0.463774	1.36727	0.339198	0.734461	0.999108	FALSE
ENSECAG00000033009			113.758	0.46522	1.60113	0.290557	0.77139	0.999108	FALSE
ENSECAG00000018811	ARL6IP1	ADP ribosylation factor like GTPase 6 interacting protein 1	1322.61	0.466982	0.781326	0.597679	0.550054	0.999108	FALSE
ENSECAG00000022024	RBM8A	RNA binding motif protein 8A	80.7166	0.467895	1.84795	0.253197	0.800116	0.999108	FALSE
ENSECAG00000012708	DNAJC8	DnaJ heat shock protein family (Hsp40) member C8	1491.2	0.468069	0.547003	0.855697	0.392166	0.999108	FALSE
ENSECAG00000009065	RPS2	ribosomal protein S2	727.266	0.469177	0.972355	0.482516	0.62944	0.999108	FALSE
ENSECAG00000012628	EPB41L4A	erythrocyte membrane protein band 4.1 like 4A	639.209	0.469404	1.09075	0.430348	0.666942	0.999108	FALSE
ENSECAG00000032617			505.665	0.470081	0.95193	0.493819	0.621434	0.999108	FALSE
ENSECAG00000012383	ATE1	arginyltransferase 1	1189.59	0.470484	0.631538	0.744982	0.456283	0.999108	FALSE
[truncated: 986 more rows]

## Sheet: VMAT_VS_FRall
ensembl_gene_id	gene_name	description	baseMean	log2FoldChange	lfcSE	stat	pvalue	padj	is_differential
ENSECAG00000008378	COMMD10	COMM domain containing 10	259.566	-7.28325	1.36694	-5.32815	9.92173e-08	5.06008e-05	TRUE
ENSECAG00000019296	GUF1	GTP binding elongation factor GUF1	139.574	-7.0542	1.7862	-3.94927	7.83891e-05	0.0122671	TRUE
ENSECAG00000015583	TCN1	transcobalamin 1	127.914	-7.00936	1.76041	-3.98167	6.84334e-05	0.0122671	TRUE
ENSECAG00000022698	CEP162	centrosomal protein 162	215.287	-6.94734	1.76112	-3.94485	7.98495e-05	0.0122671	TRUE
ENSECAG00000011917	DOCK8	dedicator of cytokinesis 8	176.768	-6.45761	1.75939	-3.67037	0.000242199	0.0274492	TRUE
ENSECAG00000021091	TRAF6	TNF receptor associated factor 6	270.718	-6.42464	1.62711	-3.9485	7.86424e-05	0.0122671	TRUE
ENSECAG00000022010	ZNF684	zinc finger protein 684	149.951	-6.25253	1.27596	-4.90027	9.57049e-07	0.000366071	TRUE
ENSECAG00000009751	NUP205	nucleoporin 205	259.388	-5.9145	1.41669	-4.17487	2.98156e-05	0.00760297	TRUE
ENSECAG00000037493			91.4124	-5.88722	1.6663	-3.53311	0.000410704	0.0379312	TRUE
ENSECAG00000010858	ANKRD37	ankyrin repeat domain 37	112.536	-5.78629	1.31589	-4.39725	1.0963e-05	0.00367742	TRUE
ENSECAG00000010835	CDPF1	cysteine rich DPF motif domain containing 1	154.351	-5.75738	1.61234	-3.57082	0.000355866	0.0362984	TRUE
ENSECAG00000014686	HAUS6	HAUS augmin like complex subunit 6	677.47	-5.035	1.27667	-3.94387	8.01773e-05	0.0122671	TRUE
ENSECAG00000015363	KLHL22	kelch like family member 22	228.319	-4.83115	1.38776	-3.48126	0.000499063	0.0424204	TRUE
ENSECAG00000005547	CDT1	chromatin licensing and DNA replication factor 1	260.097	-4.78733	1.20248	-3.98123	6.85609e-05	0.0122671	TRUE
ENSECAG00000020281	PAK2	p21 (RAC1) activated kinase 2	340.087	-4.71391	1.18333	-3.98361	6.78776e-05	0.0122671	TRUE
ENSECAG00000011080			367.16	-4.04591	1.14736	-3.52627	0.000421458	0.0379312	TRUE
ENSECAG00000024534	TERF2	telomeric repeat binding factor 2	316.592	-3.98444	1.04143	-3.82593	0.000130279	0.0173328	TRUE
ENSECAG00000010922	RAD50	RAD50 double strand break repair protein	936.85	-3.92844	1.08811	-3.61035	0.000305785	0.033418	TRUE
ENSECAG00000020660	UBA52	ubiquitin A-52 residue ribosomal protein fusion product 1	209.71	4.57995	1.21448	3.77113	0.000162509	0.0199808	TRUE
ENSECAG00000022964	CDC7	cell division cycle 7	265.65	4.75049	1.34033	3.54427	0.000393706	0.0379312	TRUE
ENSECAG00000040565			270.544	4.78247	1.3297	3.59664	0.000322359	0.0340144	TRUE
ENSECAG00000009564	TSC1	TSC complex subunit 1	667.047	5.11355	1.44882	3.52947	0.000416389	0.0379312	TRUE
ENSECAG00000023551	ANGEL1	angel homolog 1	162.859	5.17595	1.38068	3.74885	0.000177646	0.0209076	TRUE
ENSECAG00000007917	G3BP2	G3BP stress granule assembly factor 2	115.194	5.21856	1.48964	3.50323	0.000459659	0.0401874	TRUE
ENSECAG00000020134	RCAN3	RCAN family member 3	120.288	5.4185	1.43726	3.77001	0.000163242	0.0199808	TRUE
ENSECAG00000015142	TOMM70	translocase of outer mitochondrial membrane 70	85.8316	5.49096	1.433	3.83179	0.000127213	0.0173328	TRUE
ENSECAG00000025052	CBFA2T2	CBFA2/RUNX1 partner transcriptional co-repressor 2	92.6445	5.81363	1.42719	4.07349	4.63143e-05	0.0109017	TRUE
ENSECAG00000019662	REEP3	receptor accessory protein 3	766.721	5.90224	1.34838	4.37727	1.20177e-05	0.00367742	TRUE
ENSECAG00000003931	SKP1	S-phase kinase associated protein 1	50.7993	5.96335	1.52984	3.89802	9.6982e-05	0.0141317	TRUE
ENSECAG00000015498	CALCOCO2	calcium binding and coiled-coil domain 2	151.734	6.08424	1.42721	4.26304	2.01663e-05	0.0056099	TRUE
ENSECAG00000004362	TSG101	tumor susceptibility 101	164.58	6.39121	1.17182	5.4541	4.92205e-08	3.01229e-05	TRUE
ENSECAG00000010255	CCDC191	coiled-coil domain containing 191	194.284	7.24023	1.44577	5.00788	5.5032e-07	0.000240568	TRUE
ENSECAG00000006803	SYTL2	synaptotagmin like 2	236.559	8.33319	1.28738	6.47298	9.60887e-11	7.35079e-08	TRUE
ENSECAG00000009702	ACLY	ATP citrate lyase	570.914	8.3689	1.24085	6.74448	1.53577e-11	2.34973e-08	TRUE
ENSECAG00000021937	DUSP12	dual specificity phosphatase 12	391.909	8.98904	1.25477	7.16389	7.84186e-13	2.39961e-09	TRUE
ENSECAG00000011844	DIAPH2	diaphanous related formin 2	286.775	9.28678	1.40946	6.58887	4.43178e-11	4.52041e-08	TRUE
ENSECAG00000010581	TRAK2	trafficking kinesin protein 2	89.3988	-6.31325	1.91154	-3.3027	0.000957595	0.0615678	FALSE
ENSECAG00000009904	NDUFV2	NADH:ubiquinone oxidoreductase core subunit V2	165.239	-6.19965	1.85369	-3.34449	0.000824327	0.0573282	FALSE
ENSECAG00000020999	TRMT1L	tRNA methyltransferase 1 like	95.874	-6.13717	1.81462	-3.38206	0.000719446	0.0553233	FALSE
ENSECAG00000009928	CSNK1D	casein kinase 1 delta	80.1449	-5.98984	1.95671	-3.06117	0.00220471	0.109805	FALSE
ENSECAG00000015262	FOXO4	forkhead box O4	149.411	-5.92028	1.75789	-3.36784	0.000757594	0.0553233	FALSE
ENSECAG00000000872	TOR1AIP1	torsin 1A interacting protein 1	110.904	-5.8628	1.74115	-3.36721	0.000759339	0.0553233	FALSE
ENSECAG00000021317	HSCB	HscB mitochondrial iron-sulfur cluster cochaperone	220.433	-5.77873	1.71088	-3.37764	0.000731095	0.0553233	FALSE
ENSECAG00000008915	CHD1L	chromodomain helicase DNA binding protein 1 like	108.505	-5.7764	1.77895	-3.24709	0.00116592	0.0699555	FALSE
ENSECAG00000015499	XPC	XPC complex subunit, DNA damage recognition and repair factor	91.1144	-5.73915	1.71144	-3.3534	0.000798243	0.0568052	FALSE
ENSECAG00000017994	EDC3	enhancer of mRNA decapping 3	79.1074	-5.19197	1.83394	-2.83104	0.00463968	0.186612	FALSE
ENSECAG00000019776	SMC1A	structural maintenance of chromosomes 1A	119.293	-5.12988	1.5747	-3.25768	0.00112326	0.0687432	FALSE
ENSECAG00000038125			122.44	-5.1015	1.58123	-3.2263	0.00125403	0.0724025	FALSE
ENSECAG00000018676	RAD52	RAD52 homolog, DNA repair protein	109.326	-4.81321	1.60766	-2.99393	0.00275409	0.13168	FALSE
ENSECAG00000024271	TEX9	testis expressed 9	48.6639	-4.78952	2.10882	-2.27119	0.0231356	0.374205	FALSE
ENSECAG00000016168	CLIC4	chloride intracellular channel 4	48.9659	-4.74006	1.98445	-2.3886	0.0169126	0.323453	FALSE
ENSECAG00000008434	EFHC1	EF-hand domain containing 1	139.156	-4.69274	1.60187	-2.92954	0.00339464	0.150545	FALSE
ENSECAG00000022080	LAMTOR1	late endosomal/lysosomal adaptor, MAPK and MTOR activator 1	99.5458	-4.67714	1.74636	-2.67822	0.00740153	0.215702	FALSE
ENSECAG00000018358	ALKBH5	alkB homolog 5, RNA demethylase	95.4284	-4.66704	1.83395	-2.5448	0.0109341	0.257372	FALSE
ENSECAG00000014421	NVL	nuclear VCP like	94.9935	-4.59721	1.75807	-2.61492	0.00892483	0.237478	FALSE
ENSECAG00000020120	PLAA	phospholipase A2 activating protein	150.786	-4.58487	1.59369	-2.87689	0.00401622	0.170689	FALSE
ENSECAG00000018626	PPP2R1A	protein phosphatase 2 scaffold subunit Aalpha	101.762	-4.58363	1.67564	-2.73545	0.00622944	0.202788	FALSE
ENSECAG00000015858	NDEL1	nudE neurodevelopment protein 1 like 1	111.175	-4.56687	1.6974	-2.69051	0.00713434	0.21403	FALSE
ENSECAG00000022282	SCYL3	SCY1 like pseudokinase 3	40.4756	-4.55916	2.09294	-2.17835		1	FALSE
ENSECAG00000016285	FOXR1	forkhead box R1	260.633	-4.436	1.47224	-3.0131	0.0025859	0.125601	FALSE
ENSECAG00000008080	UNG	uracil DNA glycosylase	52.801	-4.39192	1.89826	-2.31365	0.0206868	0.355572	FALSE
ENSECAG00000022694	RAB6A	RAB6A, member RAS onco family	128.087	-4.38522	1.53452	-2.85772	0.00426697	0.176445	FALSE
ENSECAG00000012830	CHN2	chimerin 2	221.301	-4.37968	1.69787	-2.57952	0.00989391	0.24638	FALSE
ENSECAG00000008074	MAGT1	magnesium transporter 1	146.366	-4.32563	1.58898	-2.72226	0.00648365	0.205594	FALSE
ENSECAG00000015618	SF3B6	splicing factor 3b subunit 6	75.2523	-4.31186	1.82118	-2.36761	0.0179032	0.332024	FALSE
ENSECAG00000009706	AKAP13	A-kinase anchoring protein 13	270.643	-4.25737	1.50587	-2.82719	0.00469578	0.186612	FALSE
ENSECAG00000014565	ZNF532	zinc finger protein 532	71.8601	-4.22901	1.60836	-2.6294	0.00855362	0.229597	FALSE
ENSECAG00000020524	MRNIP	MRN complex interacting protein	145.97	-4.18285	1.54072	-2.71487	0.00663016	0.205594	FALSE
ENSECAG00000001444	BRSK1	BR serine/threonine kinase 1	54.4247	-4.16374	1.80124	-2.3116	0.0207998	0.355572	FALSE
ENSECAG00000017037	TDRD5	tudor domain containing 5	146.185	-4.15134	1.57142	-2.64178	0.00824723	0.225326	FALSE
ENSECAG00000022039	ZFP69	ZFP69 zinc finger protein	74.198	-4.13225	1.8835	-2.19392		1	FALSE
ENSECAG00000016841	MED15	mediator complex subunit 15	288.161	-4.10211	1.43179	-2.86502	0.00416979	0.174788	FALSE
ENSECAG00000017598	IMPA2	inositol monophosphatase 2	61.3956	-4.09233	1.80634	-2.26554	0.0234796	0.374205	FALSE
ENSECAG00000014560	KPNB1	karyopherin subunit beta 1	69.9396	-4.06236	1.79156	-2.2675	0.0233599	0.374205	FALSE
ENSECAG00000014960	ERI3	ERI1 exoribonuclease family member 3	336.18	-4.04076	1.21738	-3.31923	0.000902651	0.0600459	FALSE
ENSECAG00000033949	OTUB1	OTU deubiquitinase, ubiquitin aldehyde binding 1	623.298	-4.03129	1.31512	-3.06535	0.00217417	0.109805	FALSE
ENSECAG00000010373	ANKIB1	ankyrin repeat and IBR domain containing 1	228.143	-4.01471	1.62527	-2.47018	0.0135046	0.283042	FALSE
ENSECAG00000010538	HSD17B12	hydroxysteroid 17-beta dehydrogenase 12	307.833	-3.9996	1.59699	-2.50445	0.012264	0.277864	FALSE
ENSECAG00000020948	PANK3	pantothenate kinase 3	164.339	-3.98787	1.67925	-2.3748	0.0175586	0.329628	FALSE
ENSECAG00000030728	GFRA4	GDNF family receptor alpha 4	62.1721	-3.96047	1.85072	-2.13996	0.0323582	0.444018	FALSE
ENSECAG00000019848	INTS9	integrator complex subunit 9	45.8908	-3.94134	2.01433	-1.95665		1	FALSE
ENSECAG00000023940	NDOR1	NADPH dependent diflavin oxidoreductase 1	89.0918	-3.93453	1.9247	-2.04423	0.0409306	0.504379	FALSE
ENSECAG00000018059	SC5D	sterol-C5-desaturase	46.8434	-3.91941	2.04358	-1.91791	0.0551227	0.543326	FALSE
ENSECAG00000009000	PLPBP	pyridoxal phosphate binding protein	45.8426	-3.89057	1.96521	-1.97973	0.0477343	0.521668	FALSE
ENSECAG00000011036	NRBF2	nuclear receptor binding factor 2	416.672	-3.86967	1.42252	-2.7203	0.00652236	0.205594	FALSE
ENSECAG00000005267	BAG3	BAG cochaperone 3	175.465	-3.84489	1.4243	-2.6995	0.00694432	0.210392	FALSE
ENSECAG00000006136	NKAPL	NFKB activating protein like	136.153	-3.83711	1.52013	-2.52419	0.0115964	0.265341	FALSE
ENSECAG00000006958	DDX59	DEAD-box helicase 59	572.059	-3.81651	1.49681	-2.54977	0.0107795	0.2557	FALSE
ENSECAG00000021954	NAE1	NEDD8 activating enzyme E1 subunit 1	172.136	-3.80886	1.43056	-2.6625	0.00775628	0.221716	FALSE
ENSECAG00000021916	CEP120	centrosomal protein 120	109.257	-3.80528	1.37354	-2.77042	0.00559849	0.196044	FALSE
ENSECAG00000020627	NOA1	nitric oxide associated 1	243.563	-3.77721	1.45503	-2.59596	0.00943263	0.244609	FALSE
ENSECAG00000017253	SPIRE1	spire type actin nucleation factor 1	255.438	-3.76651	1.68984	-2.22891	0.0258197	0.398546	FALSE
ENSECAG00000011158	CLCC1	chloride channel CLIC like 1	196.332	-3.75316	1.32443	-2.8338	0.00459982	0.186612	FALSE
ENSECAG00000009758	CCDC115	coiled-coil domain containing 115	53.5891	-3.74958	1.74374	-2.15031	0.031531	0.44207	FALSE
ENSECAG00000020252	PDIA3	protein disulfide isomerase family A member 3	383.42	-3.71689	1.46558	-2.53611	0.0112091	0.259847	FALSE
ENSECAG00000020735	RBPMS	RNA binding protein, mRNA processing factor	110.236	-3.65697	1.72123	-2.12463	0.0336177	0.455177	FALSE
ENSECAG00000005540	SCAF8	SR-related CTD associated factor 8	47.477	-3.64847	1.6619	-2.19536	0.0281378	0.42015	FALSE
ENSECAG00000020678			49.2917	-3.63971	1.62184	-2.24418	0.0248209	0.389496	FALSE
ENSECAG00000018929	UBE2A	ubiquitin conjugating enzyme E2 A	86.4839	-3.63911	1.82808	-1.99067	0.0465171	0.515733	FALSE
ENSECAG00000010710	WDR75	WD repeat domain 75	475.22	-3.61185	1.37103	-2.63441	0.00842837	0.228237	FALSE
ENSECAG00000005195	TSC22D1	TSC22 domain family member 1	608.634	-3.60551	1.17358	-3.07222	0.00212473	0.109805	FALSE
ENSECAG00000002856	USP39	ubiquitin specific peptidase 39	157.634	-3.58608	1.84076	-1.94815	0.0513966	0.542323	FALSE
ENSECAG00000021459	DRG1	developmentally regulated GTP binding protein 1	213.178	-3.5766	1.39472	-2.56439	0.0103358	0.249973	FALSE
ENSECAG00000008976	EFCAB14	EF-hand calcium binding domain 14	582.429	-3.56934	1.28993	-2.76709	0.0056559	0.196044	FALSE
ENSECAG00000043336	TDRP	testis development related protein	59.9378	-3.56725	1.92199	-1.85601		1	FALSE
ENSECAG00000003766	GADD45GIP1	GADD45G interacting protein 1	168.947	-3.5634	1.61825	-2.20201	0.0276647	0.419079	FALSE
ENSECAG00000017458	BNIP3	BCL2 interacting protein 3	346.531	-3.56127	1.51564	-2.34967	0.0187898	0.340218	FALSE
ENSECAG00000024644	KIF3A	kinesin family member 3A	718.765	-3.55796	1.13336	-3.1393	0.00169354	0.0959675	FALSE
ENSECAG00000016301	MCUB	mitochondrial calcium uniporter dominant negative subunit beta	164.53	-3.5475	1.46868	-2.41543	0.0157165	0.31433	FALSE
ENSECAG00000014964	MRPL39	mitochondrial ribosomal protein L39	283.624	-3.50515	1.199	-2.92341	0.00346221	0.151348	FALSE
ENSECAG00000021274	COL4A6	collagen type IV alpha 6 chain	501.325	-3.49896	1.53043	-2.28626	0.0222392	0.37148	FALSE
ENSECAG00000020050	RPAP3	RNA polymerase II associated protein 3	684.832	-3.49701	1.24577	-2.8071	0.00499898	0.190123	FALSE
ENSECAG00000000162	TRIP12	thyroid hormone receptor interactor 12	419.747	-3.4813	1.35825	-2.56308	0.0103747	0.249973	FALSE
ENSECAG00000008730	MAP4K4	mitogen-activated protein kinase kinase kinase kinase 4	786.53	-3.46783	1.11373	-3.11372	0.00184745	0.102008	FALSE
ENSECAG00000021443	HEATR1	HEAT repeat containing 1	137.221	-3.45596	1.85146	-1.86661		1	FALSE
ENSECAG00000017928	NDUFA13	NADH:ubiquinone oxidoreductase subunit A13	114.389	-3.45161	1.72448	-2.00153	0.0453353	0.512734	FALSE
ENSECAG00000022204	PCMTD1	protein-L-isoaspartate (D-aspartate) O-methyltransferase domain containing 1	162.452	-3.42141	1.42219	-2.40574	0.0161399	0.31815	FALSE
ENSECAG00000009911	SLC12A7	solute carrier family 12 member 7	314.09	-3.41133	1.18325	-2.88302	0.00393888	0.16976	FALSE
ENSECAG00000021167	JMJD6	jumonji domain containing 6, arginine demethylase and lysine hydroxylase	99.0617	-3.40857	1.61209	-2.11438	0.0344832	0.462801	FALSE
ENSECAG00000015920	PHTF2	putative homeodomain transcription factor 2	328.285	-3.40805	1.50111	-2.27035	0.0231863	0.374205	FALSE
ENSECAG00000022605	TOGARAM2	TOG array regulator of axonemal microtubules 2	97.2197	-3.40558	1.55831	-2.18543	0.0288574	0.426588	FALSE
ENSECAG00000013813	PSMG4	proteasome assembly chaperone 4	225.042	-3.40334	1.70612	-1.99478	0.0460667	0.515591	FALSE
ENSECAG00000000971	SUCO	SUN domain containing ossification factor	115.214	-3.40178	1.76958	-1.92236	0.0545602	0.543326	FALSE
ENSECAG00000003632	RANBP9	RAN binding protein 9	407.174	-3.401	1.2351	-2.75361	0.00589412	0.196044	FALSE
ENSECAG00000021644	ZAR1	zygote arrest 1	119.701	-3.34016	1.21171	-2.75658	0.00584102	0.196044	FALSE
ENSECAG00000016519	ARV1	ARV1 homolog, fatty acid homeostasis modulator	210.657	-3.32608	1.38767	-2.39689	0.0165351	0.322276	FALSE
ENSECAG00000022727	MED27	mediator complex subunit 27	54.8037	-3.32484	1.82921	-1.81763	0.0691206	0.607291	FALSE
ENSECAG00000012734	BAIAP2L1	BAR/IMD domain containing adaptor protein 2 like 1	397.911	-3.29963	1.10788	-2.97832	0.00289837	0.135778	FALSE
ENSECAG00000011870	PYM1	PYM homolog 1, exon junction complex associated factor	45.4803	-3.28757	1.83774	-1.78892		1	FALSE
ENSECAG00000019408	CAT	catalase	265.79	-3.28201	1.28032	-2.56343	0.0103645	0.249973	FALSE
ENSECAG00000016645	MCOLN1	mucolipin TRP cation channel 1	225.368	-3.26747	1.45596	-2.24421	0.0248188	0.389496	FALSE
ENSECAG00000016187	FAM114A2	family with sequence similarity 114 member A2	133.37	-3.2595	1.60442	-2.03157	0.0421973	0.504881	FALSE
ENSECAG00000001853	CCNH	cyclin H	400.062	-3.23913	1.3994	-2.31466	0.0206313	0.355572	FALSE
ENSECAG00000001964	PDHA1	pyruvate dehydrogenase E1 subunit alpha 1	182.671	-3.23875	1.61693	-2.00303	0.045174	0.512734	FALSE
ENSECAG00000009197	LANCL1	LanC like 1	273.823	-3.22496	1.36626	-2.36043	0.0182539	0.335317	FALSE
ENSECAG00000023288	RNPS1	RNA binding protein with serine rich domain 1	209.514	-3.21666	1.57541	-2.0418	0.0411714	0.504379	FALSE
ENSECAG00000017202	SNX5	sorting nexin 5	66.0002	-3.21407	1.8349	-1.75164		1	FALSE
ENSECAG00000010902	CIAO2B	cytosolic iron-sulfur assembly component 2B	143.578	-3.21124	1.71689	-1.87039	0.0614303	0.573099	FALSE
ENSECAG00000010503	ZNF398	zinc finger protein 398	36.8152	-3.19145	1.84914	-1.72591	0.0843629	0.658547	FALSE
ENSECAG00000036139			104.87	-3.18932	1.55754	-2.04766	0.040593	0.504379	FALSE
ENSECAG00000007621	TRIP11	thyroid hormone receptor interactor 11	1024.77	-3.18829	1.2872	-2.47692	0.0132521	0.283042	FALSE
ENSECAG00000009667	EAPP	E2F associated phosphoprotein	508.689	-3.17421	1.0797	-2.93989		1	FALSE
ENSECAG00000018299	FKBP3	FKBP prolyl isomerase 3	318.551	-3.16629	1.45676	-2.17352	0.0297412	0.431809	FALSE
ENSECAG00000017349	CERT1	ceramide transporter 1	269.791	-3.15719	1.57056	-2.01023	0.0444067	0.512734	FALSE
ENSECAG00000017007	FANCL	FA complementation group L	414.717	-3.13843	1.28919	-2.43443	0.0149152	0.302256	FALSE
ENSECAG00000031899	CDC26	cell division cycle 26	84.1776	-3.13558	1.78789	-1.75379	0.0794666	0.635676	FALSE
ENSECAG00000013864	CNOT2	CCR4-NOT transcription complex subunit 2	347.753	-3.12925	1.4096	-2.21995	0.0264221	0.404258	FALSE
ENSECAG00000015925	EIF4A3	eukaryotic translation initiation factor 4A3	32.6006	-3.12794	2.11838	-1.47657		1	FALSE
ENSECAG00000006067	USP31	ubiquitin specific peptidase 31	210.705	-3.12298	1.50314	-2.07764	0.0377426	0.485578	FALSE
ENSECAG00000008863	BUD13	BUD13 homolog	216.838	-3.11125	1.45075	-2.14458	0.0319863	0.44207	FALSE
ENSECAG00000009444	PCYT1B	phosphate cytidylyltransferase 1B, choline	257.408	-3.11071	1.59294	-1.95282	0.0508414	0.54019	FALSE
ENSECAG00000019509	IGF2R	insulin like growth factor 2 receptor	214.313	-3.11007	1.53132	-2.03098	0.0422575	0.504881	FALSE
ENSECAG00000001100	WDSUB1	WD repeat, sterile alpha motif and U-box domain containing 1	257.227	-3.07153	1.16003	-2.64779	0.00810197	0.223352	FALSE
ENSECAG00000012875	GATAD2A	GATA zinc finger domain containing 2A	120.617	-3.066	1.71082	-1.79212	0.073113	0.621973	FALSE
ENSECAG00000012810	TNKS2	tankyrase 2	220.961	-3.04532	1.58626	-1.91981	0.0548821	0.543326	FALSE
ENSECAG00000018506	SMAD5	SMAD family member 5	482.265	-3.04407	1.18025	-2.57918	0.00990349	0.24638	FALSE
ENSECAG00000020616	TMTC3	transmembrane O-mannosyltransferase targeting cadherins 3	339.403	-3.04271	1.71549	-1.77367	0.0761173	0.623848	FALSE
ENSECAG00000018290	GPD2	glycerol-3-phosphate dehydrogenase 2	330.105	-3.02902	1.03118	-2.93743	0.00330944	0.148925	FALSE
ENSECAG00000012229	BIRC3	baculoviral IAP repeat containing 3	314.249	-3.02584	1.07876	-2.80494	0.00503267	0.190123	FALSE
ENSECAG00000014943	NENF	neudesin neurotrophic factor	49.3841	-3.01172	1.90827	-1.57824	0.11451	0.720491	FALSE
ENSECAG00000017967	METAP1	methionyl aminopeptidase 1	144.468	-3.0022	1.51059	-1.98743	0.0468746	0.515958	FALSE
ENSECAG00000010852	RPS4X	ribosomal protein S4 X-linked	164.98	-3.00108	1.4375	-2.08771	0.036824	0.479496	FALSE
ENSECAG00000032748	NOL12	nucleolar protein 12	227.229	-2.99897	1.66113	-1.80537	0.0710161	0.609443	FALSE
ENSECAG00000032072			57.6994	-2.98668	1.54664	-1.93107	0.0534738	0.543326	FALSE
ENSECAG00000009436	HCCS	holocytochrome c synthase	269.207	-2.98529	1.48593	-2.00903	0.0445335	0.512734	FALSE
ENSECAG00000010682	GNPTAB	N-acetylglucosamine-1-phosphate transferase subunits alpha and beta	457.547	-2.98158	1.2742	-2.33996	0.0192856	0.347141	FALSE
ENSECAG00000031828			30.0648	-2.9728	2.01553	-1.47495	0.140226	0.747932	FALSE
ENSECAG00000009214	SACM1L	SAC1 like phosphatidylinositide phosphatase	133.005	-2.97258	1.8875	-1.57487	0.115286	0.721223	FALSE
ENSECAG00000010056	C1H10orf90	chromosome 1 C10orf90 homolog	253.871	-2.96952	1.3187	-2.25186	0.0243309	0.385764	FALSE
ENSECAG00000001010			64.7857	-2.96627	1.77889	-1.66748	0.0954188	0.685339	FALSE
ENSECAG00000007818	VASP	vasodilator stimulated phosphoprotein	175.423	-2.96208	1.72864	-1.71353		1	FALSE
ENSECAG00000007205	ZBTB33	zinc finger and BTB domain containing 33	120.276	-2.95837	1.79934	-1.64415	0.100146	0.687012	FALSE
ENSECAG00000022243	MOSPD1	motile sperm domain containing 1	837.6	-2.94867	1.43929	-2.04869	0.0404927	0.504379	FALSE
ENSECAG00000013453	CCDC178	coiled-coil domain containing 178	985.185	-2.94353	0.947594	-3.10632	0.00189434	0.102008	FALSE
ENSECAG00000011661	NSD2	nuclear receptor binding SET domain protein 2	718.097	-2.93921	0.987922	-2.97514	0.00292854	0.135778	FALSE
ENSECAG00000021542	SLC49A4	solute carrier family 49 member 4	48.43	-2.93759	1.99746	-1.47067	0.141381	0.747932	FALSE
ENSECAG00000020873	GIN1	gypsy retrotransposon integrase 1	293.132	-2.93233	1.30958	-2.23914	0.025147	0.3926	FALSE
ENSECAG00000008288	PAK1IP1	PAK1 interacting protein 1	123.549	-2.92848	1.7716	-1.65302	0.0983273	0.685339	FALSE
ENSECAG00000014908	PLEKHA1	pleckstrin homology domain containing A1	456.128	-2.9274	1.44257	-2.02929	0.0424288	0.504881	FALSE
ENSECAG00000011808	SLC25A22	solute carrier family 25 member 22	29.2326	-2.92061	2.00927	-1.45356	0.146067	0.748451	FALSE
ENSECAG00000015595	E2F4	E2F transcription factor 4	144.545	-2.91813	1.52072	-1.91892	0.0549946	0.543326	FALSE
ENSECAG00000009640	TADA1	transcriptional adaptor 1	231.309	-2.91617	1.47549	-1.97641	0.0481079	0.52388	FALSE
ENSECAG00000011192	LBR	lamin B receptor	1027.57	-2.9157	0.883463	-3.30031	0.00096577	0.0615678	FALSE
ENSECAG00000021742	MYO5A	myosin VA	982.553	-2.91253	1.05626	-2.7574	0.00582631	0.196044	FALSE
ENSECAG00000023016	PHF3	PHD finger protein 3	224.273	-2.90856	1.46535	-1.9849	0.0471557	0.517192	FALSE
ENSECAG00000007672	TAF1A	TATA-box binding protein associated factor, RNA polymerase I subunit A	443.252	-2.90209	1.26298	-2.29782	0.0215719	0.366723	FALSE
ENSECAG00000020380	COMMD8	COMM domain containing 8	270.501	-2.89894	1.48136	-1.95695	0.0503535	0.538748	FALSE
ENSECAG00000039558	C14H5orf24	chromosome 14 C5orf24 homolog	58.1594	-2.89763	2.00703	-1.44374	0.148813	0.748951	FALSE
ENSECAG00000011505	CHD9	chromodomain helicase DNA binding protein 9	348.06	-2.88929	1.12011	-2.57947	0.00989512	0.24638	FALSE
ENSECAG00000024410	EMC3	ER membrane protein complex subunit 3	77.5792	-2.88467	1.7715	-1.62837	0.103446	0.697235	FALSE
ENSECAG00000018957	CEBPZ	CCAAT enhancer binding protein zeta	112.183	-2.87754	1.68922	-1.70347	0.0884808	0.672443	FALSE
ENSECAG00000000438	VDAC3	voltage dependent anion channel 3	281.428	-2.87083	1.57941	-1.81766	0.0691168	0.607291	FALSE
ENSECAG00000016769	TAF4B	TATA-box binding protein associated factor 4b	286.403	-2.86768	1.06096	-2.70292	0.00687333	0.210324	FALSE
ENSECAG00000006997	PRPF18	pre-mRNA processing factor 18	195.482	-2.86552	1.56586	-1.83	0.0672504	0.598553	FALSE
ENSECAG00000009828	KDM6B	lysine demethylase 6B	81.2923	-2.85875	1.76823	-1.61673	0.105936	0.706242	FALSE
ENSECAG00000018652	SYCP2L	synaptonemal complex protein 2 like	105.993	-2.85079	1.72234	-1.65519	0.0978866	0.685339	FALSE
ENSECAG00000023108	YTHDF2	YTH N6-methyladenosine RNA binding protein 2	459.803	-2.83784	1.21813	-2.32966	0.019824	0.350643	FALSE
ENSECAG00000011243	NCOA6	nuclear receptor coactivator 6	147.185	-2.83594	1.69667	-1.67147	0.0946287	0.685339	FALSE
ENSECAG00000024123	ANKRD31	ankyrin repeat domain 31	534.73	-2.83111	1.3194	-2.14575	0.031893	0.44207	FALSE
ENSECAG00000026833	ZFC3H1	zinc finger C3H1-type containing	121.583	-2.82015	1.67095	-1.68776	0.0914578	0.681949	FALSE
ENSECAG00000010659	LSM14B	LSM family member 14B	120.889	-2.817	1.44987	-1.94294	0.052024	0.543326	FALSE
ENSECAG00000017630	MOCOS	molybdenum cofactor sulfurase	241.614	-2.8078	1.53128	-1.83363	0.0667086	0.596867	FALSE
ENSECAG00000012948	LDB1	LIM domain binding 1	289.076	-2.80014	0.947416	-2.95555	0.00312108	0.142545	FALSE
ENSECAG00000024884	ZNF251	zinc finger protein 251	146.685	-2.79968	1.72946	-1.61882	0.105486	0.704775	FALSE
ENSECAG00000007513	HSPA9	heat shock protein family A (Hsp70) member 9	135.25	-2.79412	1.74298	-1.60307	0.108919	0.712039	FALSE
ENSECAG00000010086	KATNA1	katanin catalytic subunit A1	303.974	-2.7856	1.57293	-1.77096	0.0765667	0.623848	FALSE
ENSECAG00000016180	RAI14	retinoic acid induced 14	225.008	-2.77348	1.67931	-1.65156	0.098625	0.685339	FALSE
ENSECAG00000007770	ERCC6L2	ERCC excision repair 6 like 2	189.391	-2.75614	1.48207	-1.85965	0.0629352	0.581818	FALSE
ENSECAG00000008444	NCBP3	nuclear cap binding subunit 3	219.741	-2.75566	1.4987	-1.83869	0.0659601	0.596867	FALSE
ENSECAG00000012474	TTF2	transcription termination factor 2	219.448	-2.75487	1.35996	-2.0257	0.0427955	0.505614	FALSE
ENSECAG00000007020	C1H14orf28	chromosome 1 C14orf28 homolog	49.6614	-2.75291	1.96629	-1.40005	0.161498	0.760409	FALSE
ENSECAG00000021560	ULK4	unc-51 like kinase 4	169.976	-2.7476	1.47072	-1.86821	0.0617334	0.574177	FALSE
ENSECAG00000037356			56.2846	-2.74633	1.93496	-1.41932		1	FALSE
ENSECAG00000013247	PER2	period circadian regulator 2	180.196	-2.74403	1.44079	-1.90453	0.0568414	0.545802	FALSE
ENSECAG00000014393	CEP135	centrosomal protein 135	151.434	-2.73782	1.52801	-1.79175	0.0731733	0.621973	FALSE
ENSECAG00000022599	RFC4	replication factor C subunit 4	235.927	-2.73535	1.30356	-2.09837	0.0358722	0.473142	FALSE
ENSECAG00000012606	EXOSC8	exosome component 8	119.401	-2.73227	1.71137	-1.59654	0.110367	0.712039	FALSE
ENSECAG00000024592	ALG5	ALG5 dolichyl-phosphate beta-glucosyltransferase	234.531	-2.71765	1.35415	-2.0069	0.0447605	0.512734	FALSE
ENSECAG00000007559	KIF16B	kinesin family member 16B	188.778	-2.71697	1.6502	-1.64645	0.0996716	0.685975	FALSE
ENSECAG00000020824	EPS15	epidermal growth factor receptor pathway substrate 15	305.969	-2.70939	1.45617	-1.86063	0.0627967	0.581818	FALSE
ENSECAG00000024569	IMMT	inner membrane mitochondrial protein	359.219	-2.7088	1.59191	-1.7016	0.0888297	0.672819	FALSE
ENSECAG00000009616	LMO7	LIM domain 7	81.0079	-2.70796	1.95137	-1.38773		1	FALSE
ENSECAG00000022687	STT3A	STT3 oligosaccharyltransferase complex catalytic subunit A	484.776	-2.70766	1.46731	-1.84532	0.0649911	0.595017	FALSE
ENSECAG00000019542			125.977	-2.70104	1.81033	-1.49202	0.135695	0.745741	FALSE
ENSECAG00000024614	FAM161A	FAM161 centrosomal protein A	619.052	-2.69487	1.03596	-2.60132	0.00928664	0.242881	FALSE
ENSECAG00000019829	FNTA	farnesyltransferase, CAAX box, alpha	88.3827	-2.69447	1.66316	-1.62009	0.105212	0.704775	FALSE
ENSECAG00000021819	PPIL4	peptidylprolyl isomerase like 4	200.139	-2.69264	1.40538	-1.91595	0.0553709	0.543326	FALSE
ENSECAG00000008649	CCDC12	coiled-coil domain containing 12	20.0723	-2.68815	2.28165	-1.17816	0.238733	0.816228	FALSE
ENSECAG00000016034	CASP7	caspase 7	181.385	-2.68391	1.31472	-2.04144	0.0412075	0.504379	FALSE
ENSECAG00000013526	RPH3A	rabphilin 3A	295.448	-2.68088	1.57919	-1.69763	0.0895784	0.673977	FALSE
ENSECAG00000008005	AKT2	AKT serine/threonine kinase 2	184.468	-2.68042	1.08412	-2.47244	0.0134195	0.283042	FALSE
ENSECAG00000021455	C22H20orf27	chromosome 22 C20orf27 homolog	113.681	-2.6761	1.4566	-1.83722	0.0661773	0.596867	FALSE
ENSECAG00000018274	FAM172A	family with sequence similarity 172 member A	592.014	-2.66563	1.10886	-2.40394	0.0162194	0.31815	FALSE
ENSECAG00000022718			154.224	-2.6629	1.53968	-1.72952	0.0837159	0.655168	FALSE
ENSECAG00000011226	CENPQ	centromere protein Q	91.2962	-2.65938	1.49353	-1.7806	0.0749781	0.623848	FALSE
ENSECAG00000023743	MIX23	mitochondrial matrix import factor 23	245.262	-2.6459	1.18787	-2.22743	0.0259185	0.398546	FALSE
ENSECAG00000018428	HSPH1	heat shock protein family H (Hsp110) member 1	255.553	-2.63964	1.28731	-2.0505	0.0403159	0.504379	FALSE
ENSECAG00000000220	STK35	serine/threonine kinase 35	257.286	-2.62665	1.35435	-1.93941	0.0524509	0.543326	FALSE
ENSECAG00000009118	OCLN	occludin	52.0993	-2.62528	1.66522	-1.57654	0.114902	0.720491	FALSE
ENSECAG00000003158	ZNF624	zinc finger protein 624	76.5312	-2.62386	1.9491	-1.34619	0.178243	0.776955	FALSE
ENSECAG00000019192	CCT5	chaperonin containing TCP1 subunit 5	416.603	-2.62315	1.38425	-1.895	0.0580918	0.553772	FALSE
ENSECAG00000000398	PITRM1	pitrilysin metallopeptidase 1	181.091	-2.62143	1.26294	-2.07566	0.0379258	0.485578	FALSE
ENSECAG00000006430	RPS10	ribosomal protein S10	141.505	-2.60882	1.43886	-1.81311	0.0698141	0.607291	FALSE
ENSECAG00000026816	EFHD2	EF-hand domain family member D2	14.7418	-2.60481	2.43519	-1.06965	0.284775	0.842038	FALSE
ENSECAG00000042921	GNB5	G protein subunit beta 5	79.8602	-2.59991	1.82888	-1.42158		1	FALSE
ENSECAG00000007483	NUP107	nucleoporin 107	187.001	-2.59967	1.30484	-1.99232	0.0463358	0.515591	FALSE
ENSECAG00000009855	ALS2	alsin Rho guanine nucleotide exchange factor ALS2	318.855	-2.5981	1.00926	-2.57426	0.0100454	0.247896	FALSE
ENSECAG00000021026	BCAS2	BCAS2 pre-mRNA processing factor	262.616	-2.59111	1.5124	-1.71324	0.0866676	0.666339	FALSE
ENSECAG00000017503	BNC2	basonuclin 2	23.0663	-2.58857	2.06793	-1.25177	0.210654	0.806055	FALSE
ENSECAG00000016660	USP3	ubiquitin specific peptidase 3	367.086	-2.58431	1.1999	-2.15378	0.0312577	0.440777	FALSE
ENSECAG00000018527	ASH1L	ASH1 like histone lysine methyltransferase	223.049	-2.57719	1.63978	-1.57166	0.116029	0.723111	FALSE
ENSECAG00000020289	GTF2I	ral transcription factor IIi	184.301	-2.57287	1.60958	-1.59848	0.109937	0.712039	FALSE
ENSECAG00000008327	PI4K2A	phosphatidylinositol 4-kinase type 2 alpha	101.818	-2.5723	1.72533	-1.4909	0.135988	0.745741	FALSE
ENSECAG00000023263	RNF13	ring finger protein 13	275.555	-2.55654	1.51649	-1.68583	0.0918288	0.681949	FALSE
ENSECAG00000009997	KLHDC2	kelch domain containing 2	187.094	-2.55426	1.72444	-1.48121	0.13855	0.746412	FALSE
ENSECAG00000013324	TXN	thioredoxin	147.158	-2.54633	1.18057	-2.15686	0.0310163	0.439398	FALSE
ENSECAG00000021538	CKAP2L	cytoskeleton associated protein 2 like	249.48	-2.54594	1.40321	-1.81437	0.0696204	0.607291	FALSE
ENSECAG00000007885	ORC5	origin recognition complex subunit 5	316.197	-2.54512	1.25497	-2.02803	0.0425571	0.504881	FALSE
ENSECAG00000021379	PEX1	peroxisomal biosis factor 1	315.417	-2.53298	1.42747	-1.77446	0.075987	0.623848	FALSE
ENSECAG00000006078	AGO2	argonaute RISC catalytic component 2	365.343	-2.53019	1.31142	-1.92935	0.0536874	0.543326	FALSE
ENSECAG00000038338			171.406	-2.52625	1.48841	-1.69728	0.0896433	0.673977	FALSE
ENSECAG00000021720	NOC3L	NOC3 like DNA replication regulator	373.803	-2.52182	1.04903	-2.40396	0.0162186	0.31815	FALSE
ENSECAG00000008665	FOXJ3	forkhead box J3	290.359	-2.52175	1.60759	-1.56865	0.116729	0.725809	FALSE
ENSECAG00000025110	DDX17	DEAD-box helicase 17	248.861	-2.5208	1.09849	-2.29478	0.0217457	0.367635	FALSE
ENSECAG00000000547	TM9SF4	transmembrane 9 superfamily member 4	332.601	-2.51843	1.03085	-2.44307	0.0145631	0.297087	FALSE
ENSECAG00000016653	EEF1B2	eukaryotic translation elongation factor 1 beta 2	137.98	-2.51634	1.63196	-1.54191	0.123095	0.738009	FALSE
ENSECAG00000022722	ESPL1	extra spindle pole bodies like 1, separase	68.9029	-2.51501	1.56431	-1.60774	0.107891	0.709994	FALSE
ENSECAG00000038761	ABHD17A	abhydrolase domain containing 17A, depalmitoylase	539.647	-2.51436	1.05595	-2.38112	0.0172599	0.328045	FALSE
ENSECAG00000018424	EIF2S1	eukaryotic translation initiation factor 2 subunit alpha	60.4792	-2.51194	1.81743	-1.38214	0.166929	0.761387	FALSE
ENSECAG00000018209	CAAP1	caspase activity and apoptosis inhibitor 1	185.471	-2.51066	1.41497	-1.77435	0.0760056	0.623848	FALSE
ENSECAG00000012163	CEP170	centrosomal protein 170	283.657	-2.51056	1.73494	-1.44706	0.147879	0.748951	FALSE
ENSECAG00000011637	SLC1A5	solute carrier family 1 member 5	67.4326	-2.50611	1.77895	-1.40875		1	FALSE
ENSECAG00000014482	TOR2A	torsin family 2 member A	193.189	-2.50259	1.32446	-1.88953	0.0588214	0.555536	FALSE
ENSECAG00000022623	SNX9	sorting nexin 9	183.425	-2.50049	1.70397	-1.46745	0.142254	0.747932	FALSE
ENSECAG00000024835	NELL1	neural EGFL like 1	372.196	-2.49733	1.28991	-1.93605	0.0528614	0.543326	FALSE
ENSECAG00000018072			269.235	-2.48746	1.01306	-2.4554	0.0140728	0.290594	FALSE
ENSECAG00000019621	SP110	SP110 nuclear body protein	568.43	-2.48636	0.995237	-2.49826	0.0124804	0.278422	FALSE
ENSECAG00000032798	RAB10	RAB10, member RAS onco family	104.645	-2.47138	1.72064	-1.43632	0.150912	0.751307	FALSE
ENSECAG00000015881	EXT2	exostosin glycosyltransferase 2	241.925	-2.46516	1.61985	-1.52184	0.128049	0.742904	FALSE
ENSECAG00000016568	CS	citrate synthase	69.3033	-2.46299	1.73296	-1.42126	0.155241	0.75567	FALSE
ENSECAG00000013180	LRP5	LDL receptor related protein 5	188.767	-2.448	1.47473	-1.65997	0.0969213	0.685339	FALSE
ENSECAG00000009638	PALS2	protein associated with LIN7 2, MAGUK p55 family member	532.162	-2.44682	1.21843	-2.00818	0.0446239	0.512734	FALSE
ENSECAG00000023141	LAMC1	laminin subunit gamma 1	268.235	-2.44565	1.59497	-1.53336	0.125188	0.738009	FALSE
ENSECAG00000007262	EEA1	early endosome antigen 1	806.457	-2.43646	1.16272	-2.09548	0.0361286	0.474479	FALSE
ENSECAG00000023502	PREP	prolyl endopeptidase	93.945	-2.43516	1.67881	-1.45053	0.146911	0.748451	FALSE
ENSECAG00000016494	MICU2	mitochondrial calcium uptake 2	252.118	-2.43338	1.58368	-1.53654	0.124406	0.738009	FALSE
ENSECAG00000024190	UCHL3	ubiquitin C-terminal hydrolase L3	98.9893	-2.42953	1.77805	-1.3664	0.171813	0.7722	FALSE
ENSECAG00000005653	PTP4A2	protein tyrosine phosphatase 4A2	496.218	-2.42504	1.33602	-1.81512	0.0695056	0.607291	FALSE
ENSECAG00000020652	ECHDC1	ethylmalonyl-CoA decarboxylase 1	239.596	-2.41514	1.63501	-1.47714	0.139637	0.747932	FALSE
ENSECAG00000000303	SLC2A1	solute carrier family 2 member 1	79.5216	-2.40821	1.92	-1.25427	0.209742	0.806055	FALSE
ENSECAG00000017553	SEPTIN2	septin 2	109.561	-2.40407	1.56896	-1.53228	0.125455	0.738009	FALSE
ENSECAG00000021725	TFDP2	transcription factor Dp-2	672.355	-2.39642	1.22678	-1.95342	0.0507694	0.54019	FALSE
ENSECAG00000023985	MTRES1	mitochondrial transcription rescue factor 1	278.844	-2.38907	0.998364	-2.39299	0.0167119	0.323453	FALSE
ENSECAG00000018625			67.6851	-2.38867	1.4813	-1.61255	0.106842	0.70937	FALSE
ENSECAG00000009721	SETD2	SET domain containing 2, histone lysine methyltransferase	534.147	-2.38672	1.10189	-2.16602	0.0303099	0.434592	FALSE
ENSECAG00000022770	PTTG1IP	PTTG1 interacting protein	124.48	-2.38125	1.7481	-1.3622	0.173136	0.7722	FALSE
ENSECAG00000023573	ATAD2B	ATPase family AAA domain containing 2B	147.833	-2.38032	1.89868	-1.25367		1	FALSE
ENSECAG00000017126	NPHP4	nephrocystin 4	49.2455	-2.3778	1.92318	-1.23639	0.216313	0.811812	FALSE
ENSECAG00000021780	S100PBP	S100P binding protein	135.093	-2.37307	1.545	-1.53596	0.124547	0.738009	FALSE
ENSECAG00000024076	PRMT1	protein arginine methyltransferase 1	1275.69	-2.36974	0.939072	-2.52349	0.0116195	0.265341	FALSE
ENSECAG00000039318			82.9953	-2.3696	1.7821	-1.32967	0.183629	0.78783	FALSE
ENSECAG00000015528	CUL2	cullin 2	125.289	-2.3548	1.82588	-1.28968	0.197162	0.796579	FALSE
ENSECAG00000006979	GALNT10	polypeptide N-acetylgalactosaminyltransferase 10	394.567	-2.3477	1.17814	-1.99272	0.0462925	0.515591	FALSE
ENSECAG00000032667	INA	internexin neuronal intermediate filament protein alpha	125.061	-2.34745	1.65499	-1.4184	0.156073	0.75567	FALSE
ENSECAG00000012307	PIH1D2	PIH1 domain containing 2	291.615	-2.34742	1.31906	-1.77962	0.0751386	0.623848	FALSE
ENSECAG00000002113	BARD1	BRCA1 associated RING domain 1	706.024	-2.33963	1.10003	-2.12688	0.0334299	0.454647	FALSE
ENSECAG00000024188	ANKRD49	ankyrin repeat domain 49	260.73	-2.32642	1.12339	-2.0709	0.0383685	0.489198	FALSE
ENSECAG00000000595	SLC30A9	solute carrier family 30 member 9	215.461	-2.32448	1.45166	-1.60125	0.109322	0.712039	FALSE
ENSECAG00000022396	SMC3	structural maintenance of chromosomes 3	871.397	-2.32196	1.00232	-2.31659	0.0205261	0.355572	FALSE
ENSECAG00000019086	POLR3B	RNA polymerase III subunit B	167.769	-2.31858	1.57068	-1.47616	0.1399	0.747932	FALSE
ENSECAG00000018844	TUBGCP2	tubulin gamma complex associated protein 2	117.981	-2.31688	1.71796	-1.34863		1	FALSE
ENSECAG00000008062	DDHD2	DDHD domain containing 2	60.2783	-2.31298	1.99141	-1.16148	0.245446	0.827441	FALSE
ENSECAG00000022702	ARHGEF12	Rho guanine nucleotide exchange factor 12	83.2382	-2.31283	1.69299	-1.36612	0.171902	0.7722	FALSE
ENSECAG00000014542	SPICE1	spindle and centriole associated protein 1	384.023	-2.30958	1.2937	-1.78525	0.0742205	0.623848	FALSE
ENSECAG00000011652	PABPN1	poly(A) binding protein nuclear 1	268.8	-2.3073	1.15696	-1.99428	0.046121	0.515591	FALSE
ENSECAG00000018393	BTBD9	BTB domain containing 9	192.24	-2.30673	1.6174	-1.4262	0.153812	0.75186	FALSE
ENSECAG00000007687	PTPN14	protein tyrosine phosphatase non-receptor type 14	152.649	-2.29859	1.58309	-1.45196	0.146512	0.748451	FALSE
ENSECAG00000020425	ITSN2	intersectin 2	1339.29	-2.29413	0.935069	-2.45344	0.0141498	0.290594	FALSE
ENSECAG00000022855	IST1	IST1 factor associated with ESCRT-III	111.27	-2.29264	1.62005	-1.41516	0.157021	0.756668	FALSE
ENSECAG00000020015	BMP6	bone morphotic protein 6	269.862	-2.29158	1.24859	-1.83533	0.0664562	0.596867	FALSE
ENSECAG00000020575	TFG	trafficking from ER to golgi regulator	209.256	-2.28364	1.30978	-1.74353	0.0812406	0.644031	FALSE
ENSECAG00000020259	SMAD3	SMAD family member 3	90.5042	-2.28299	1.71109	-1.33423	0.182128	0.786054	FALSE
ENSECAG00000021401	SMAP1	small ArfGAP 1	115.224	-2.27977	1.80862	-1.2605	0.207489	0.803693	FALSE
ENSECAG00000011797	SOD2	superoxide dismutase 2	239.429	-2.2787	1.68292	-1.35402	0.17573	0.774259	FALSE
ENSECAG00000008525	ZNF512B	zinc finger protein 512B	212.628	-2.27606	1.39886	-1.62709	0.103719	0.697538	FALSE
ENSECAG00000011390	GNPTG	N-acetylglucosamine-1-phosphate transferase subunit gamma	66.8117	-2.27527	1.76587	-1.28847	0.197583	0.796579	FALSE
ENSECAG00000018906	ZNF292	zinc finger protein 292	230.292	-2.26577	1.81394	-1.24909	0.211633	0.806055	FALSE
ENSECAG00000022420	LSR	lipolysis stimulated lipoprotein receptor	409.401	-2.26072	1.16813	-1.93533	0.05295	0.543326	FALSE
ENSECAG00000024811	TSC22D2	TSC22 domain family member 2	296.1	-2.25169	1.70988	-1.31687	0.187884	0.78783	FALSE
ENSECAG00000019802	SREBF1	sterol regulatory element binding transcription factor 1	126.279	-2.25129	1.57503	-1.42936	0.152901	0.751307	FALSE
ENSECAG00000000266	RYBP	RING1 and YY1 binding protein	353.827	-2.24271	1.16506	-1.92497		1	FALSE
ENSECAG00000000713	MDM1	Mdm1 nuclear protein	513.467	-2.23617	1.24097	-1.80195	0.071553	0.611598	FALSE
ENSECAG00000020273	MRPL2	mitochondrial ribosomal protein L2	106.513	-2.23414	1.73251	-1.28954	0.197211	0.796579	FALSE
ENSECAG00000011029	RAD17	RAD17 checkpoint clamp loader component	217.12	-2.23307	1.79065	-1.24707	0.21237	0.806055	FALSE
ENSECAG00000014779	PSMC4	proteasome 26S subunit, ATPase 4	136.355	-2.2314	1.60332	-1.39174	0.164001	0.760409	FALSE
ENSECAG00000014821	AAMP	angio associated migratory cell protein	218.763	-2.22811	1.47444	-1.51115	0.13075	0.744348	FALSE
ENSECAG00000033690	TUBA1C	tubulin alpha 1c	301.657	-2.22786	1.18006	-1.88792	0.0590361	0.555848	FALSE
ENSECAG00000021652	RAB3IP	RAB3A interacting protein	349.477	-2.22493	1.5259	-1.45811	0.144809	0.748451	FALSE
ENSECAG00000016102	CHD8	chromodomain helicase DNA binding protein 8	440.271	-2.221	1.53873	-1.4434	0.148909	0.748951	FALSE
ENSECAG00000017966	TTC12	tetratricopeptide repeat domain 12	100.876	-2.21932	1.85148	-1.19868	0.230653	0.811812	FALSE
ENSECAG00000003473	WIPI1	WD repeat domain, phosphoinositide interacting 1	127.743	-2.21928	1.82387	-1.2168	0.223681	0.811812	FALSE
ENSECAG00000022441	ESR1	estrogen receptor 1	138.701	-2.21306	1.75221	-1.26301		1	FALSE
ENSECAG00000000410	GLT8D1	glycosyltransferase 8 domain containing 1	369.765	-2.21141	1.12041	-1.97376	0.0484088	0.525287	FALSE
ENSECAG00000022195	IGSF8	immunoglobulin superfamily member 8	24.4627	-2.21105	2.18985	-1.00968		1	FALSE
ENSECAG00000003783			107.054	-2.20733	1.77	-1.24708	0.212367	0.806055	FALSE
ENSECAG00000007825	CALCA	calcitonin-related polypeptide alpha	198.166	-2.2043	1.57602	-1.39864	0.16192	0.760409	FALSE
ENSECAG00000015471	IFT81	intraflagellar transport 81	148.636	-2.20329	1.84872	-1.19179		1	FALSE
ENSECAG00000014940	RBM22	RNA binding motif protein 22	622.21	-2.19911	1.14998	-1.91231	0.0558368	0.543326	FALSE
ENSECAG00000015502	RFFL	ring finger and FYVE like domain containing E3 ubiquitin protein ligase	253.927	-2.18783	1.26308	-1.73214	0.083249	0.653582	FALSE
ENSECAG00000019023	ACOT9	acyl-CoA thioesterase 9	175.557	-2.18373	1.56384	-1.39639	0.162596	0.760409	FALSE
ENSECAG00000019020	WDCP	WD repeat and coiled coil containing	162.393	-2.18325	1.67831	-1.30086	0.193306	0.792918	FALSE
ENSECAG00000013136	ADD1	adducin 1	235.598	-2.17991	1.52107	-1.43314	0.151817	0.751307	FALSE
ENSECAG00000009847	MTA2	metastasis associated 1 family member 2	249.718	-2.17959	1.11125	-1.96139	0.0498337	0.535057	FALSE
ENSECAG00000002456	RMI1	RecQ mediated genome instability 1	86.0766	-2.17679	1.78996	-1.21611	0.223942	0.811812	FALSE
ENSECAG00000006712	WRAP73	WD repeat containing, antisense to TP73	227.774	-2.17625	1.56174	-1.39348	0.163475	0.760409	FALSE
ENSECAG00000023865	RAB11A	RAB11A, member RAS onco family	518.028	-2.17199	1.38951	-1.56314	0.118021	0.725809	FALSE
ENSECAG00000000782	HNRNPA2B1	heteroous nuclear ribonucleoprotein A2/B1	379.19	-2.17092	1.43091	-1.51715	0.129228	0.744348	FALSE
ENSECAG00000006881	CKAP4	cytoskeleton associated protein 4	137.565	-2.16927	1.79068	-1.21142	0.225734	0.811812	FALSE
ENSECAG00000002377	SPESP1	sperm equatorial segment protein 1	231.173	-2.16408	1.38668	-1.56061	0.118615	0.725809	FALSE
ENSECAG00000022366	TLE6	TLE family member 6, subcortical maternal complex member	31.104	-2.16111	1.94991	-1.10831	0.267727	0.833401	FALSE
ENSECAG00000015098	MORC3	MORC family CW-type zinc finger 3	295.306	-2.15617	1.40503	-1.53462	0.124878	0.738009	FALSE
ENSECAG00000009987	PCNP	PEST proteolytic signal containing nuclear protein	336.134	-2.15566	1.03062	-2.09161	0.0364735	0.476961	FALSE
ENSECAG00000014113	CCNG2	cyclin G2	196.897	-2.1488	1.4369	-1.49545	0.134798	0.745741	FALSE
ENSECAG00000003869	ZC3H7A	zinc finger CCCH-type containing 7A	195.671	-2.14819	1.78893	-1.20082	0.229821	0.811812	FALSE
ENSECAG00000028405			361.141	-2.14757	1.43644	-1.49506	0.134898	0.745741	FALSE
ENSECAG00000000735	MKNK1	MAPK interacting serine/threonine kinase 1	192.068	-2.14717	1.30407	-1.64652	0.0996572	0.685975	FALSE
ENSECAG00000006429	ANXA5	annexin A5	465.465	-2.14362	1.35277	-1.58462	0.113053	0.720491	FALSE
ENSECAG00000008989	AUH	AU RNA binding methylglutaconyl-CoA hydratase	233.021	-2.13777	1.73113	-1.2349	0.216868	0.811812	FALSE
ENSECAG00000022271	CEP97	centrosomal protein 97	134.631	-2.13525	1.74737	-1.22198	0.221714	0.811812	FALSE
ENSECAG00000024846	RCE1	Ras converting CAAX endopeptidase 1	123.436	-2.12975	1.76413	-1.20725	0.227335	0.811812	FALSE
ENSECAG00000007602	LTV1	LTV1 ribosome biogenesis factor	341.472	-2.1281	1.46344	-1.45417	0.145899	0.748451	FALSE
ENSECAG00000016358			207.971	-2.12585	1.50956	-1.40826	0.159055	0.760409	FALSE
ENSECAG00000021377	FAM171B	family with sequence similarity 171 member B	117.94	-2.11884	1.76378	-1.2013	0.229633	0.811812	FALSE
ENSECAG00000021311	NUDC	nuclear distribution C, dynein complex regulator	179.86	-2.11396	1.75374	-1.2054	0.22805	0.811812	FALSE
ENSECAG00000008991	NDE1	nudE neurodevelopment protein 1	58.0978	-2.10705	1.80335	-1.16841	0.242642	0.823154	FALSE
ENSECAG00000018153			296.798	-2.10488	1.33314	-1.57889	0.114361	0.720491	FALSE
ENSECAG00000026906	COX16	cytochrome c oxidase assembly factor COX16	69.046	-2.10248	1.51808	-1.38496	0.166064	0.761387	FALSE
ENSECAG00000000513	PRELID3B	PRELI domain containing 3B	143.238	-2.10237	1.41876	-1.48184	0.138384	0.746412	FALSE
ENSECAG00000023608	TMEM171	transmembrane protein 171	265.435	-2.10037	1.50488	-1.39571		1	FALSE
ENSECAG00000011669	TNN	tenascin N	166.758	-2.09944	1.54231	-1.36123	0.173441	0.7722	FALSE
ENSECAG00000008264	AKT1	AKT serine/threonine kinase 1	65.6931	-2.09696	1.5567	-1.34706	0.177961	0.776955	FALSE
ENSECAG00000014116	SLC38A9	solute carrier family 38 member 9	186.346	-2.0949	1.35242	-1.549	0.121381	0.73249	FALSE
ENSECAG00000007233	UBE2E3	ubiquitin conjugating enzyme E2 E3	1058.87	-2.0928	1.0145	-2.06288	0.0391241	0.49471	FALSE
ENSECAG00000011403	ALDH3A2	aldehyde dehydrogenase 3 family member A2	235.819	-2.08882	1.378	-1.51583	0.129562	0.744348	FALSE
ENSECAG00000018130	ZFAND6	zinc finger AN1-type containing 6	138.58	-2.08524	1.64506	-1.26758	0.20495	0.802604	FALSE
ENSECAG00000011135	GPATCH4	G-patch domain containing 4	538.321	-2.08405	1.30552	-1.59633	0.110415	0.712039	FALSE
ENSECAG00000017859	FKBP6	FKBP prolyl isomerase family member 6 (inactive)	362.372	-2.07867	1.19061	-1.74589	0.0808301	0.642442	FALSE
ENSECAG00000022067	KYAT1	kynurenine aminotransferase 1	91.5727	-2.07544	1.58697	-1.3078	0.19094	0.78783	FALSE
ENSECAG00000013268	AP1S3	adaptor related protein complex 1 subunit sigma 3	223.049	-2.07056	1.63136	-1.26922	0.204363	0.802604	FALSE
ENSECAG00000022369	WBP2	WW domain binding protein 2	610.09	-2.06828	1.43455	-1.44176	0.149369	0.748951	FALSE
ENSECAG00000022576	IARS2	isoleucyl-tRNA synthetase 2, mitochondrial	208.02	-2.06246	1.4317	-1.44056	0.149709	0.748951	FALSE
ENSECAG00000017034	FBXO30	F-box protein 30	672.679	-2.06063	0.938688	-2.19523	0.0281473	0.42015	FALSE
ENSECAG00000022979	MPG	N-methylpurine DNA glycosylase	163.401	-2.05779	1.41865	-1.45052	0.146913	0.748451	FALSE
ENSECAG00000008537	DHX16	DEAH-box helicase 16	127.991	-2.05526	1.4595	-1.40819	0.159073	0.760409	FALSE
ENSECAG00000015258	RPL18A	ribosomal protein L18a	496.098	-2.04772	1.3129	-1.55969	0.118833	0.725809	FALSE
ENSECAG00000000584	COX7A2L	cytochrome c oxidase subunit 7A2 like	23.3272	-2.04481	2.19444	-0.931814		1	FALSE
ENSECAG00000009396	PABPC4	poly(A) binding protein cytoplasmic 4	650.505	-2.04262	1.03798	-1.96788	0.0490818	0.530708	FALSE
ENSECAG00000007008	CDKL5	cyclin dependent kinase like 5	411.835	-2.03616	1.25727	-1.6195	0.105339	0.704775	FALSE
ENSECAG00000012956	DCPS	decapping enzyme, scavenger	295.786	-2.03573	1.28683	-1.58197	0.113656	0.720491	FALSE
ENSECAG00000015121	ACSF3	acyl-CoA synthetase family member 3	69.87	-2.03116	1.87885	-1.08106	0.279669	0.842038	FALSE
ENSECAG00000019520	SSR1	signal sequence receptor subunit 1	759.152	-2.02992	0.861145	-2.35724	0.0184115	0.335352	FALSE
ENSECAG00000016028	N4BP2L2	NEDD4 binding protein 2 like 2	503.624	-2.02531	1.44626	-1.40038	0.161399	0.760409	FALSE
ENSECAG00000018435	WDR1	WD repeat domain 1	145.367	-2.02362	1.54115	-1.31306	0.189163	0.78783	FALSE
ENSECAG00000013860	TAMM41	TAM41 mitochondrial translocator assembly and maintenance homolog	47.7123	-2.02204	1.94082	-1.04185		1	FALSE
ENSECAG00000038623	MTURN	maturin, neural progenitor differentiation regulator homolog	227.214	-2.022	1.36114	-1.48552	0.137407	0.746412	FALSE
ENSECAG00000020717	HELQ	helicase, POLQ like	676.524	-2.01648	1.33086	-1.51517	0.129729	0.744348	FALSE
ENSECAG00000000711	COIL	coilin	502.955	-2.0148	1.32066	-1.5256	0.12711	0.742285	FALSE
ENSECAG00000021478	EIF4A1	eukaryotic translation initiation factor 4A1	262.676	-2.01216	1.26046	-1.59637	0.110407	0.712039	FALSE
ENSECAG00000000008	RPLP2	ribosomal protein lateral stalk subunit P2	223.563	-2.01176	1.27112	-1.58266	0.113498	0.720491	FALSE
ENSECAG00000015935	ACTB	actin beta	131.32	-2.01108	1.41166	-1.42462	0.154266	0.752876	FALSE
ENSECAG00000005770	BNIP3L	BCL2 interacting protein 3 like	1101.62	-2.00913	0.923918	-2.17457	0.029662	0.431809	FALSE
ENSECAG00000007254	IZUMO1R	IZUMO1 receptor, JUNO	58.1839	-1.99514	1.7349	-1.15	0.250143	0.827441	FALSE
ENSECAG00000013171	RNF216	ring finger protein 216	490.544	-1.9897	1.18994	-1.6721	0.0945046	0.685339	FALSE
ENSECAG00000007350	SIVA1	SIVA1 apoptosis inducing factor	582.951	-1.98595	1.21665	-1.63231	0.102614	0.693152	FALSE
ENSECAG00000011008	MCOLN2	mucolipin TRP cation channel 2	137.59	-1.98521	1.78389	-1.11286	0.26577	0.831897	FALSE
ENSECAG00000011331	LDHB	lactate dehydrogenase B	94.8294	-1.98507	1.74402	-1.13821	0.255032	0.828824	FALSE
ENSECAG00000010175	NDUFS8	NADH:ubiquinone oxidoreductase core subunit S8	82.193	-1.98289	1.86645	-1.06239	0.288061	0.842038	FALSE
ENSECAG00000018803	PGM2L1	phosphoglucomutase 2 like 1	72.6929	-1.97495	1.78468	-1.10661	0.268463	0.833487	FALSE
ENSECAG00000001187	PRCC	proline rich mitotic checkpoint control factor	626.722	-1.96953	0.983516	-2.00254	0.0452271	0.512734	FALSE
ENSECAG00000021318	PRPF8	pre-mRNA processing factor 8	234.385	-1.96669	1.47361	-1.33461	0.182004	0.786054	FALSE
ENSECAG00000010731	DCLRE1A	DNA cross-link repair 1A	1033.81	-1.96372	0.903664	-2.17307	0.0297751	0.431809	FALSE
ENSECAG00000009748	TDRD1	tudor domain containing 1	168.339	-1.95843	1.5509	-1.26277	0.206672	0.802604	FALSE
ENSECAG00000016015	PCDH19	protocadherin 19	81.8896	-1.95784	1.78519	-1.09671	0.272768	0.838118	FALSE
ENSECAG00000021453	TICRR	TOPBP1 interacting checkpoint and replication regulator	201.447	-1.95088	1.72223	-1.13276	0.257315	0.828824	FALSE
ENSECAG00000021107	TRAFD1	TRAF-type zinc finger domain containing 1	134.059	-1.94626	1.42788	-1.36304	0.172869	0.7722	FALSE
ENSECAG00000008445	MPDZ	multiple PDZ domain crumbs cell polarity complex component	276.447	-1.94558	1.62296	-1.19878	0.230612	0.811812	FALSE
ENSECAG00000032705	H1-3	H1.3 linker histone, cluster member	425.257	-1.93951	1.24518	-1.55761	0.119326	0.725917	FALSE
ENSECAG00000023171	MED21	mediator complex subunit 21	443.526	-1.93382	1.22861	-1.57399	0.11549	0.721223	FALSE
ENSECAG00000016091	ATG16L1	autophagy related 16 like 1	342.37	-1.93171	1.20095	-1.60848	0.10773	0.709994	FALSE
ENSECAG00000023269	GMPS	guanine monophosphate synthase	377.915	-1.93147	1.50253	-1.28548	0.198625	0.796804	FALSE
ENSECAG00000023747	KYAT3	kynurenine aminotransferase 3	115.951	-1.92935	1.82806	-1.05541		1	FALSE
ENSECAG00000013509	LCOR	ligand dependent nuclear receptor corepressor	908.346	-1.92912	1.1078	-1.74139	0.0816146	0.645324	FALSE
ENSECAG00000039611	NDUFC2	NADH:ubiquinone oxidoreductase subunit C2	59.3152	-1.92702	1.87764	-1.0263	0.304751	0.84365	FALSE
ENSECAG00000000221	ETV5	ETS variant transcription factor 5	181.869	-1.92577	1.46408	-1.31534	0.188394	0.78783	FALSE
ENSECAG00000001985	APH1B	aph-1 homolog B, gamma-secretase subunit	66.2547	-1.92443	1.85381	-1.03809	0.299226	0.84365	FALSE
ENSECAG00000009738	RPS19	ribosomal protein S19	245.081	-1.92038	1.57716	-1.21762	0.223369	0.811812	FALSE
ENSECAG00000020895	G2E3	G2/M-phase specific E3 ubiquitin protein ligase	250.654	-1.91599	1.30467	-1.46856	0.141953	0.747932	FALSE
ENSECAG00000007748	ZFP90	ZFP90 zinc finger protein	131.457	-1.91509	1.65822	-1.15491	0.248128	0.827441	FALSE
ENSECAG00000006749	ATP13A3	ATPase 13A3	155.803	-1.91175	1.81481	-1.05342	0.292149	0.84365	FALSE
ENSECAG00000008375	ST7	suppression of tumorigenicity 7	223.868	-1.91126	1.52746	-1.25127	0.210837	0.806055	FALSE
ENSECAG00000022426	SWAP70	switching B cell complex subunit SWAP70	457.087	-1.91048	1.34961	-1.41559	0.156897	0.756668	FALSE
ENSECAG00000014264	TDP2	tyrosyl-DNA phosphodiesterase 2	300.261	-1.90963	1.10871	-1.72239	0.0849993	0.661827	FALSE
ENSECAG00000014334	EEF1G	eukaryotic translation elongation factor 1 gamma	73.7452	-1.90862	1.96408	-0.971761		1	FALSE
ENSECAG00000017611	C8H18orf63	chromosome 8 C18orf63 homolog	113.653	-1.90671	1.77373	-1.07498	0.282386	0.842038	FALSE
ENSECAG00000025151	SCO1	synthesis of cytochrome C oxidase 1	52.2807	-1.90648	2.09376	-0.910554		1	FALSE
ENSECAG00000002520	SLC45A4	solute carrier family 45 member 4	470.262	-1.90414	1.15886	-1.64312	0.100358	0.687012	FALSE
ENSECAG00000014130	CSNK2A2	casein kinase 2 alpha 2	192.059	-1.9038	1.5552	-1.22415	0.220897	0.811812	FALSE
ENSECAG00000039947	VGLL4	vestigial like family member 4	1194.66	-1.90353	1.12039	-1.699	0.08932	0.673977	FALSE
ENSECAG00000022752	NUP214	nucleoporin 214	278.517	-1.90291	1.56947	-1.21245	0.22534	0.811812	FALSE
ENSECAG00000026924	JKAMP	JNK1/MAPK8 associated membrane protein	297.977	-1.8979	1.49947	-1.26571	0.205617	0.802604	FALSE
ENSECAG00000010029	ZDHHC3	zinc finger DHHC-type palmitoyltransferase 3	163.091	-1.89444	1.80231	-1.05112	0.293203	0.84365	FALSE
ENSECAG00000021299	NOP56	NOP56 ribonucleoprotein	536.571	-1.89172	1.09988	-1.71993	0.0854443	0.663603	FALSE
ENSECAG00000017271	ARHGAP5	Rho GTPase activating protein 5	84.9091	-1.8913	1.78163	-1.06156	0.288438	0.842038	FALSE
ENSECAG00000009776	CEP57L1	centrosomal protein 57 like 1	363.564	-1.88974	1.3844	-1.36502	0.172246	0.7722	FALSE
ENSECAG00000022931	TCF7L1	transcription factor 7 like 1	356.435	-1.88946	1.21053	-1.56085	0.118559	0.725809	FALSE
ENSECAG00000014000	KLHL20	kelch like family member 20	131.998	-1.88744	1.55817	-1.21132	0.225773	0.811812	FALSE
ENSECAG00000013475	SEC61A1	SEC61 translocon subunit alpha 1	49.1136	-1.87746	1.89486	-0.990821	0.321773	0.856281	FALSE
ENSECAG00000013404	CAND1	cullin associated and neddylation dissociated 1	143.51	-1.8718	1.64926	-1.13493	0.256403	0.828824	FALSE
ENSECAG00000022045	DNTTIP2	deoxynucleotidyltransferase terminal interacting protein 2	387.166	-1.86821	1.34147	-1.39266	0.163722	0.760409	FALSE
ENSECAG00000004050	SLC8A1	solute carrier family 8 member A1	326.816	-1.86795	1.55978	-1.19757	0.231083	0.811812	FALSE
ENSECAG00000020987	LCA5	lebercilin LCA5	210.817	-1.85536	1.69274	-1.09607	0.273048	0.838118	FALSE
ENSECAG00000016692	H2AZ2	H2A.Z histone 2	416.649	-1.85278	1.29787	-1.42756	0.153419	0.751307	FALSE
ENSECAG00000030415			46.3524	-1.84833	1.47052	-1.25692	0.208783	0.805791	FALSE
ENSECAG00000017197	RANBP1	RAN binding protein 1	713.158	-1.84685	0.969938	-1.90409	0.056899	0.545802	FALSE
ENSECAG00000015493	NAV1	neuron navigator 1	268.167	-1.83713	1.70632	-1.07666	0.281631	0.842038	FALSE
ENSECAG00000012337	LMAN2	lectin, mannose binding 2	101.848	-1.83486	1.86056	-0.986189	0.324041	0.856547	FALSE
ENSECAG00000024709	COPS2	COP9 signalosome subunit 2	174.62	-1.83159	1.62362	-1.12809	0.259282	0.829809	FALSE
ENSECAG00000019890	VRK1	VRK serine/threonine kinase 1	304.003	-1.8297	1.36715	-1.33833	0.180788	0.782478	FALSE
ENSECAG00000019560	KCTD10	potassium channel tetramerization domain containing 10	175.542	-1.8288	1.53637	-1.19034	0.233912	0.811891	FALSE
ENSECAG00000010859	KIF4A	kinesin family member 4A	469.658	-1.8254	1.0336	-1.76605	0.0773871	0.626467	FALSE
ENSECAG00000026929	CKLF	chemokine like factor	528.86	-1.82427	1.22149	-1.49348	0.135311	0.745741	FALSE
ENSECAG00000009943	RTF2	replication termination factor 2	306.333	-1.82415	1.16925	-1.56011	0.118735	0.725809	FALSE
ENSECAG00000016309	ZFYVE21	zinc finger FYVE-type containing 21	33.9732	-1.81724	2.13686	-0.850424	0.39509	0.892033	FALSE
ENSECAG00000017109	QSOX1	quiescin sulfhydryl oxidase 1	313.958	-1.80897	1.08316	-1.67008	0.0949037	0.685339	FALSE
ENSECAG00000008967			108.812	-1.8084	1.54868	-1.1677	0.242928	0.82321	FALSE
ENSECAG00000017122	NCKAP5	NCK associated protein 5	171.074	-1.80815	1.53074	-1.18123	0.237512	0.812962	FALSE
ENSECAG00000008139	ZNF280D	zinc finger protein 280D	103.905	-1.80379	1.80724	-0.99809	0.318236	0.852716	FALSE
ENSECAG00000024078	MKLN1	muskelin 1	117.404	-1.80078	1.7047	-1.05636	0.290802	0.84365	FALSE
ENSECAG00000014127	XRCC1	X-ray repair cross complementing 1	751.247	-1.79814	1.02046	-1.76209	0.0780545	0.628608	FALSE
ENSECAG00000008252	NOL11	nucleolar protein 11	211.258	-1.79568	1.32656	-1.35363	0.175853	0.774259	FALSE
ENSECAG00000014740	YWHAH	tyrosine 3-monooxygenase/tryptophan 5-monooxygenase activation protein eta	130.893	-1.79163	1.30715	-1.37063	0.170489	0.771051	FALSE
ENSECAG00000028537			218.06	-1.78701	1.54994	-1.15296	0.248928	0.827441	FALSE
ENSECAG00000020816	PDLIM1	PDZ and LIM domain 1	42.5083	-1.78635	1.8906	-0.944857	0.344732	0.867429	FALSE
ENSECAG00000020010	MYLIP	myosin regulatory light chain interacting protein	295.286	-1.78261	1.09094	-1.63401	0.102258	0.693152	FALSE
ENSECAG00000009340	NUDT1	nudix hydrolase 1	71.7113	-1.78155	1.90706	-0.934186	0.350208	0.867429	FALSE
ENSECAG00000016738	NAF1	nuclear assembly factor 1 ribonucleoprotein	159.293	-1.77739	1.73929	-1.02191	0.306824	0.844278	FALSE
ENSECAG00000021378	SH2D2A	SH2 domain containing 2A	25.0522	-1.76535	1.95019	-0.905221	0.365348	0.873919	FALSE
ENSECAG00000014027	NEGR1	neuronal growth regulator 1	75.9512	-1.75913	1.87303	-0.939188	0.347634	0.867429	FALSE
ENSECAG00000008202	SBDS	SBDS ribosome maturation factor	872.629	-1.7575	1.0652	-1.64993	0.0989581	0.685339	FALSE
ENSECAG00000035031	UBB	ubiquitin B	1228.97	-1.75471	1.04145	-1.68488	0.092012	0.681949	FALSE
ENSECAG00000011360	PCGF1	polycomb group ring finger 1	235.702	-1.75326	1.22641	-1.42959	0.152836	0.751307	FALSE
ENSECAG00000016697	MTIF3	mitochondrial translational initiation factor 3	662.603	-1.75191	1.27604	-1.37293	0.169774	0.769642	FALSE
ENSECAG00000008758	RFLNB	refilin B	19.2338	-1.75041	2.33354	-0.75011	0.453189	0.913453	FALSE
ENSECAG00000004979	RBM44	RNA binding motif protein 44	157.132	-1.74362	1.79781	-0.969858	0.332117	0.864183	FALSE
ENSECAG00000019346	KHDRBS1	KH RNA binding domain containing, signal transduction associated 1	148.68	-1.74038	1.64316	-1.05917	0.289524	0.842038	FALSE
ENSECAG00000011107	PPP1R9B	protein phosphatase 1 regulatory subunit 9B	386.704	-1.7354	1.13207	-1.53294	0.125291	0.738009	FALSE
ENSECAG00000008822	FASTKD2	FAST kinase domains 2	110.708	-1.73172	1.49304	-1.15986	0.246107	0.827441	FALSE
ENSECAG00000009443	MAP3K21	mitogen-activated protein kinase kinase kinase 21	62.0926	-1.72857	2.00123	-0.863753	0.387723	0.886824	FALSE
ENSECAG00000010367	RAD51AP1	RAD51 associated protein 1	890.091	-1.72775	1.10323	-1.56607	0.117331	0.725809	FALSE
ENSECAG00000022270	INTS3	integrator complex subunit 3	198.278	-1.72643	1.21891	-1.41637	0.156667	0.756668	FALSE
ENSECAG00000023803	TM9SF2	transmembrane 9 superfamily member 2	84.078	-1.72602	1.35351	-1.27522	0.202231	0.802604	FALSE
ENSECAG00000034988	MAPK6	mitogen-activated protein kinase 6	413.381	-1.72532	1.13381	-1.52171	0.128083	0.742904	FALSE
ENSECAG00000017845	GGCT	gamma-glutamylcyclotransferase	278.013	-1.72322	1.43443	-1.20133	0.229624	0.811812	FALSE
ENSECAG00000018858	PHF10	PHD finger protein 10	203.754	-1.7143	1.44747	-1.18434	0.236277	0.812936	FALSE
ENSECAG00000015743	HMGXB3	HMG-box containing 3	192.348	-1.71111	1.43289	-1.19417	0.232413	0.811812	FALSE
ENSECAG00000018533	SALL4	spalt like transcription factor 4	269.682	-1.70882	1.09384	-1.56222	0.118235	0.725809	FALSE
ENSECAG00000006452	YWHAG	tyrosine 3-monooxygenase/tryptophan 5-monooxygenase activation protein gamma	49.611	-1.70856	1.95376	-0.874502	0.381845	0.885999	FALSE
ENSECAG00000023415	PSMB7	proteasome 20S subunit beta 7	237.515	-1.70073	1.60651	-1.05865	0.28976	0.842038	FALSE
ENSECAG00000023186	ZCCHC9	zinc finger CCHC-type containing 9	324.875	-1.70059	1.22871	-1.38405	0.166344	0.761387	FALSE
ENSECAG00000014123	TXLNG	taxilin gamma	1023.22	-1.69897	0.888074	-1.91309	0.0557361	0.543326	FALSE
ENSECAG00000010405	TRIB2	tribbles pseudokinase 2	208.754	-1.69785	0.954222	-1.77931	0.0751895	0.623848	FALSE
ENSECAG00000011307	ASTL	astacin like metalloendopeptidase	54.836	-1.69782	1.87292	-0.906513	0.364664	0.873919	FALSE
ENSECAG00000024672	UNK	unk zinc finger	221.115	-1.69595	1.58749	-1.06832	0.285374	0.842038	FALSE
ENSECAG00000004707	MFSD6	major facilitator superfamily domain containing 6	71.8954	-1.69493	1.525	-1.11143	0.266383	0.831897	FALSE
ENSECAG00000023886	RPA1	replication protein A1	70.2333	-1.69484	1.8137	-0.934466	0.350063	0.867429	FALSE
ENSECAG00000021962			232.532	-1.69146	1.28915	-1.31207	0.189497	0.78783	FALSE
ENSECAG00000000426	CENPL	centromere protein L	45.4194	-1.69019	2.14104	-0.789423		1	FALSE
ENSECAG00000006986	SLC26A5	solute carrier family 26 member 5	176.282	-1.6893	1.10174	-1.5333	0.125203	0.738009	FALSE
ENSECAG00000018363	GNAQ	G protein subunit alpha q	41.8565	-1.68841	2.08193	-0.810984	0.417375	0.900105	FALSE
ENSECAG00000026908	PFDN6	prefoldin subunit 6	219.925	-1.68673	1.12315	-1.50179	0.133151	0.745741	FALSE
ENSECAG00000016023	CCNO	cyclin O	207.256	-1.6863	1.42066	-1.18698	0.235234	0.812783	FALSE
ENSECAG00000021056	ZNF182	zinc finger protein 182	481.881	-1.68199	1.34941	-1.24646	0.212595	0.806055	FALSE
ENSECAG00000017758	SH3KBP1	SH3 domain containing kinase binding protein 1	1200.08	-1.68108	1.04391	-1.61037	0.107317	0.709994	FALSE
ENSECAG00000038817	SNAP29	synaptosome associated protein 29	286.529	-1.6786	1.32503	-1.26684	0.205214	0.802604	FALSE
ENSECAG00000000678	NFYC	nuclear transcription factor Y subunit gamma	322.152	-1.67836	1.24252	-1.35078	0.176767	0.776049	FALSE
ENSECAG00000042533	SELENOH	selenoprotein H	242.035	-1.66298	1.30901	-1.27041	0.203939	0.802604	FALSE
ENSECAG00000010287	DPF1	double PHD fingers 1	412.496	-1.65653	1.15228	-1.43761		1	FALSE
ENSECAG00000021422	DNAJC13	DnaJ heat shock protein family (Hsp40) member C13	82.6202	-1.6551	1.92674	-0.859013		1	FALSE
ENSECAG00000010845	RASA2	RAS p21 protein activator 2	324.021	-1.6505	1.09901	-1.5018	0.133149	0.745741	FALSE
ENSECAG00000021564	NAA35	N-alpha-acetyltransferase 35, NatC auxiliary subunit	536.055	-1.64863	1.03874	-1.58714	0.112482	0.720491	FALSE
ENSECAG00000020049	NBEAL1	neurobeachin like 1	429.884	-1.64799	1.07595	-1.53167	0.125605	0.738009	FALSE
ENSECAG00000014355	TMEM41A	transmembrane protein 41A	292.502	-1.64577	1.53247	-1.07393	0.282853	0.842038	FALSE
ENSECAG00000021124	PRMT3	protein arginine methyltransferase 3	375.522	-1.64361	1.0924	-1.50458	0.132432	0.745741	FALSE
ENSECAG00000007116	CIZ1	CDKN1A interacting zinc finger protein 1	122.036	-1.63633	1.88643	-0.867423		1	FALSE
ENSECAG00000001318	UBL3	ubiquitin like 3	152.914	-1.63595	1.40548	-1.16398	0.244433	0.82648	FALSE
ENSECAG00000040285	DDX39A	DExD-box helicase 39A	99.5673	-1.63539	1.76539	-0.926365	0.354257	0.867429	FALSE
ENSECAG00000023879	IQGAP1	IQ motif containing GTPase activating protein 1	928.264	-1.63325	1.02785	-1.589	0.112061	0.720392	FALSE
ENSECAG00000026989	PDCD7	programmed cell death 7	713.828	-1.62875	0.887758	-1.83467	0.066554	0.596867	FALSE
ENSECAG00000017226	WWC2	WW and C2 domain containing 2	203.392	-1.6283	1.5867	-1.02622	0.30479	0.84365	FALSE
ENSECAG00000018551	MFN1	mitofusin 1	100.16	-1.62636	1.78231	-0.9125	0.361505	0.873091	FALSE
ENSECAG00000024905	STRIP1	striatin interacting protein 1	42.1017	-1.62042	1.97116	-0.82206	0.411043	0.899064	FALSE
ENSECAG00000013110	ESYT1	extended synaptotagmin 1	70.1983	-1.62033	1.93963	-0.835379	0.403505	0.89589	FALSE
ENSECAG00000008260	UTP18	UTP18 small subunit processome component	412.054	-1.61921	1.31408	-1.2322	0.217874	0.811812	FALSE
ENSECAG00000025008	MKNK2	MAPK interacting serine/threonine kinase 2	341.856	-1.61617	1.17348	-1.37725	0.168435	0.765973	FALSE
ENSECAG00000018381	RPN2	ribophorin II	519.945	-1.61473	1.22179	-1.32161	0.186297	0.78783	FALSE
ENSECAG00000010110	U2AF2	U2 small nuclear RNA auxiliary factor 2	83.3148	-1.61253	1.73845	-0.92757		1	FALSE
ENSECAG00000007095	PLEKHG1	pleckstrin homology and RhoGEF domain containing G1	325.548	-1.60999	1.42822	-1.12728	0.259626	0.829809	FALSE
ENSECAG00000019849	ARCN1	archain 1	588.519	-1.60702	1.11563	-1.44046	0.149736	0.748951	FALSE
ENSECAG00000011079	MRPL19	mitochondrial ribosomal protein L19	466.113	-1.60503	0.983187	-1.63248	0.102579	0.693152	FALSE
ENSECAG00000001058	SLC7A7	solute carrier family 7 member 7	323.959	-1.60498	1.34	-1.19775	0.231016	0.811812	FALSE
ENSECAG00000006400	TOX4	TOX high mobility group box family member 4	1149.14	-1.60488	0.901516	-1.7802	0.0750437	0.623848	FALSE
ENSECAG00000012452	ATG12	autophagy related 12	155.175	-1.59924	1.24083	-1.28885	0.197451	0.796579	FALSE
ENSECAG00000010387	FAN1	FANCD2 and FANCI associated nuclease 1	217.708	-1.59419	1.55255	-1.02682	0.304506	0.84365	FALSE
ENSECAG00000006965	PUS1	pseudouridine synthase 1	60.0377	-1.59081	1.85595	-0.857143	0.391366	0.890329	FALSE
ENSECAG00000021208	RC3H1	ring finger and CCCH-type domains 1	775.608	-1.59012	0.933535	-1.70333	0.0885055	0.672443	FALSE
ENSECAG00000004224	SAP130	Sin3A associated protein 130	217.357	-1.58224	1.6233	-0.974703	0.329708	0.860736	FALSE
ENSECAG00000033344	PIK3R3	phosphoinositide-3-kinase regulatory subunit 3	243.939	-1.58122	1.64492	-0.961275	0.336414	0.86652	FALSE
ENSECAG00000023420	NFKBIA	NFKB inhibitor alpha	588.836	-1.57475	1.23939	-1.27059	0.203876	0.802604	FALSE
ENSECAG00000015369	NID2	nidogen 2	51.4339	-1.57436	1.85447	-0.848952	0.395908	0.892033	FALSE
ENSECAG00000007963	ADAM10	ADAM metallopeptidase domain 10	597.867	-1.57394	1.33954	-1.17498	0.240001	0.817969	FALSE
ENSECAG00000019669	KDM1A	lysine demethylase 1A	118.567	-1.57192	1.76695	-0.88962	0.37367	0.880917	FALSE
ENSECAG00000000116	SUPT20H	SPT20 homolog, SAGA complex component	2118.5	-1.56889	1.09451	-1.43342	0.151738	0.751307	FALSE
ENSECAG00000012628	EPB41L4A	erythrocyte membrane protein band 4.1 like 4A	482.127	-1.56116	1.40013	-1.11501	0.264848	0.831897	FALSE
ENSECAG00000014059	ECT2	epithelial cell transforming 2	1597.46	-1.56051	1.02578	-1.52129	0.128187	0.742904	FALSE
ENSECAG00000016313	PTPN4	protein tyrosine phosphatase non-receptor type 4	694.032	-1.55704	1.18011	-1.3194	0.187035	0.78783	FALSE
ENSECAG00000012588	DTNBP1	dystrobrevin binding protein 1	270.038	-1.55683	1.50582	-1.03388	0.301193	0.84365	FALSE
ENSECAG00000012108	PPP2R1B	protein phosphatase 2 scaffold subunit Abeta	385.521	-1.55445	1.37769	-1.1283	0.259192	0.829809	FALSE
ENSECAG00000008800	ZMYM4	zinc finger MYM-type containing 4	358.637	-1.55055	1.60799	-0.964282	0.334905	0.865292	FALSE
ENSECAG00000036555			557.705	-1.5494	1.06012	-1.46153	0.143871	0.748451	FALSE
ENSECAG00000017604	SOS1	SOS Ras/Rac guanine nucleotide exchange factor 1	214.604	-1.54797	1.79163	-0.863998	0.387589	0.886824	FALSE
ENSECAG00000024907	ABCF1	ATP binding cassette subfamily F member 1	631.802	-1.5452	1.05544	-1.46404	0.143184	0.748451	FALSE
ENSECAG00000024204	CASTOR1	cytosolic arginine sensor for mTORC1 subunit 1	52.5062	-1.54427	2.05959	-0.749797		1	FALSE
ENSECAG00000017587	ZRANB1	zinc finger RANBP2-type containing 1	132.135	-1.5435	1.62255	-0.951279	0.341463	0.867429	FALSE
ENSECAG00000019606	SNX29	sorting nexin 29	95.1072	-1.53979	1.79968	-0.855587	0.392226	0.890365	FALSE
ENSECAG00000013147	SKP2	S-phase kinase associated protein 2	576.822	-1.53875	1.03183	-1.49128	0.135887	0.745741	FALSE
ENSECAG00000016155	KIF18A	kinesin family member 18A	2258.49	-1.53715	0.764339	-2.01109	0.0443163	0.512734	FALSE
ENSECAG00000022650	TRMT10B	tRNA methyltransferase 10B	44.5034	-1.53644	1.89824	-0.809401	0.418284	0.900105	FALSE
ENSECAG00000018405	EHMT1	euchromatic histone lysine methyltransferase 1	572.27	-1.53578	1.10227	-1.39329	0.163532	0.760409	FALSE
ENSECAG00000041964	STMP1	short transmembrane mitochondrial protein 1	48.7983	-1.53539	1.54732	-0.992288	0.321057	0.856281	FALSE
ENSECAG00000002380	RAB35	RAB35, member RAS onco family	126.828	-1.5259	1.86755	-0.817061	0.413893	0.900105	FALSE
ENSECAG00000012044	PTPDC1	protein tyrosine phosphatase domain containing 1	448.885	-1.52444	1.45707	-1.04623	0.295453	0.84365	FALSE
ENSECAG00000022427	UNC13C	unc-13 homolog C	248.126	-1.52037	1.0174	-1.49437	0.135079	0.745741	FALSE
ENSECAG00000022254	TPM4	tropomyosin 4	105.629	-1.51851	1.7222	-0.881727	0.377924	0.885489	FALSE
ENSECAG00000006649	CELF2	CUGBP Elav-like family member 2	240.749	-1.5146	1.32991	-1.13887	0.254755	0.828824	FALSE
ENSECAG00000022401	NFXL1	nuclear transcription factor, X-box binding like 1	488.117	-1.511	1.40269	-1.07722	0.281381	0.842038	FALSE
ENSECAG00000017556	ATP6V1D	ATPase H+ transporting V1 subunit D	316.56	-1.50999	1.14895	-1.31423	0.188768	0.78783	FALSE
ENSECAG00000016921	CPEB4	cytoplasmic polyadenylation element binding protein 4	316.893	-1.50902	1.44305	-1.04571	0.295695	0.84365	FALSE
ENSECAG00000010585	KCNK7	potassium two pore domain channel subfamily K member 7	16.6528	-1.50813	2.37313	-0.635502		1	FALSE
ENSECAG00000041239			228.751	-1.50453	1.41793	-1.06107	0.288656	0.842038	FALSE
ENSECAG00000020933	ITPR1	inositol 1,4,5-trisphosphate receptor type 1	299.566	-1.50214	1.44947	-1.03634	0.300042	0.84365	FALSE
ENSECAG00000010198	PITPNB	phosphatidylinositol transfer protein beta	1049.73	-1.49696	0.810123	-1.84782	0.064629	0.593888	FALSE
ENSECAG00000024365	DHX29	DExH-box helicase 29	1074	-1.49421	1.22115	-1.22361	0.221101	0.811812	FALSE
ENSECAG00000009326	MED1	mediator complex subunit 1	472.729	-1.49257	0.977096	-1.52756	0.126622	0.74085	FALSE
ENSECAG00000019344	SIRT7	sirtuin 7	427.484	-1.49009	1.05049	-1.41847	0.156055	0.75567	FALSE
ENSECAG00000018172	MRPL22	mitochondrial ribosomal protein L22	857.803	-1.48941	1.17437	-1.26827	0.204703	0.802604	FALSE
ENSECAG00000004471	EIF4E3	eukaryotic translation initiation factor 4E family member 3	16.6656	-1.48777	2.37548	-0.626303	0.531116	0.944502	FALSE
ENSECAG00000010403	BARHL2	BarH like homeobox 2	179.664	-1.48763	1.46801	-1.01337	0.310885	0.846916	FALSE
ENSECAG00000020160	GNA12	G protein subunit alpha 12	53.16	-1.4849	1.8971	-0.78272		1	FALSE
ENSECAG00000017754			269.174	-1.48111	1.24181	-1.1927	0.232986	0.811812	FALSE
ENSECAG00000011582	DLGAP4	DLG associated protein 4	435.144	-1.48093	1.27705	-1.15965	0.246192	0.827441	FALSE
ENSECAG00000000869	RPL26L1	ribosomal protein L26 like 1	218.727	-1.48075	1.42442	-1.03955	0.298549	0.84365	FALSE
ENSECAG00000007234	SPATA2	spermatosis associated 2	344.845	-1.4775	1.23981	-1.19172	0.233373	0.811812	FALSE
ENSECAG00000015732	IL37	interleukin 37	412.48	-1.4731	1.41075	-1.0442	0.296395	0.84365	FALSE
ENSECAG00000020822	DIAPH1	diaphanous related formin 1	313.748	-1.47273	1.12068	-1.31414	0.188799	0.78783	FALSE
ENSECAG00000020548			226.036	-1.4701	1.19217	-1.23312	0.21753	0.811812	FALSE
ENSECAG00000026846	ATP6V0C	ATPase H+ transporting V0 subunit c	46.5214	-1.46969	1.97978	-0.742346	0.457877	0.915941	FALSE
ENSECAG00000042253			38.7315	-1.46861	2.03901	-0.720257	0.471367	0.922771	FALSE
ENSECAG00000026935	SPIDR	scaffold protein involved in DNA repair	126.465	-1.46803	1.77465	-0.827224	0.40811	0.89589	FALSE
ENSECAG00000008167	SPPL2A	signal peptide peptidase like 2A	479.763	-1.46744	1.06179	-1.38205	0.166958	0.761387	FALSE
ENSECAG00000008516	TBP	TATA-box binding protein	196.29	-1.46466	1.54043	-0.950811	0.3417	0.867429	FALSE
ENSECAG00000017953	TCP1	t-complex 1	288.044	-1.46127	1.32834	-1.10007	0.2713	0.836146	FALSE
ENSECAG00000009719	EBAG9	estrogen receptor binding site associated antigen 9	613.196	-1.4596	1.10903	-1.3161	0.18814	0.78783	FALSE
ENSECAG00000000236	EIF3E	eukaryotic translation initiation factor 3 subunit E	368.719	-1.45562	1.42034	-1.02484	0.30544	0.84365	FALSE
ENSECAG00000012562	CAMSAP2	calmodulin regulated spectrin associated protein family member 2	521.039	-1.45552	1.50773	-0.965371		1	FALSE
ENSECAG00000015006	FGFR1	fibroblast growth factor receptor 1	214.29	-1.44886	1.28794	-1.12495	0.260611	0.829809	FALSE
ENSECAG00000008927	HIPK2	homeodomain interacting protein kinase 2	118.008	-1.44864	1.60055	-0.905089	0.365418	0.873919	FALSE
ENSECAG00000000555	PBRM1	polybromo 1	1988.31	-1.44684	1.01359	-1.42744	0.153453	0.751307	FALSE
ENSECAG00000000319	SRP14	signal recognition particle 14	641.024	-1.4452	1.14261	-1.26482	0.205935	0.802604	FALSE
ENSECAG00000024814	SRARP	steroid receptor associated and regulated protein	383.818	-1.44425	1.06275	-1.35898	0.174154	0.7722	FALSE
ENSECAG00000012674	APTX	aprataxin	365.224	-1.43889	1.52249	-0.945088	0.344614	0.867429	FALSE
ENSECAG00000018012	SELENBP1	selenium binding protein 1	166.713	-1.437	1.47377	-0.975049	0.329536	0.860736	FALSE
ENSECAG00000021768	IQCE	IQ motif containing E	210.226	-1.43544	1.55938	-0.920524	0.357299	0.869797	FALSE
ENSECAG00000018466	MTFR1	mitochondrial fission regulator 1	341.192	-1.43373	1.35106	-1.06119	0.288604	0.842038	FALSE
ENSECAG00000040006	SLBP2	stem loop binding protein 2	168.495	-1.43297	1.57615	-0.909158	0.363267	0.873919	FALSE
ENSECAG00000026848	SNRPC	small nuclear ribonucleoprotein polypeptide C	224.434	-1.43215	1.36759	-1.04721	0.295005	0.84365	FALSE
ENSECAG00000006379	NIPA2	NIPA magnesium transporter 2	219.662	-1.41855	1.5281	-0.928305	0.353249	0.867429	FALSE
ENSECAG00000021504	SPATA22	spermatosis associated 22	248.652	-1.41751	1.32119	-1.07291	0.283313	0.842038	FALSE
ENSECAG00000022152	CACHD1	cache domain containing 1	126.016	-1.41733	1.56659	-0.904728	0.36561	0.873919	FALSE
ENSECAG00000009727	RAC1	Rac family small GTPase 1	154.21	-1.41584	1.67327	-0.84615	0.397469	0.892337	FALSE
ENSECAG00000007222	RNF130	ring finger protein 130	649.118	-1.41473	0.904988	-1.56326	0.117992	0.725809	FALSE
ENSECAG00000008454	PFDN5	prefoldin subunit 5	113.99	-1.41199	1.76149	-0.801589	0.422791	0.900933	FALSE
ENSECAG00000013226	ZDHHC6	zinc finger DHHC-type palmitoyltransferase 6	6.38504	-1.41086	3.11466	-0.452973	0.650568	0.970104	FALSE
ENSECAG00000007301	ATXN2L	ataxin 2 like	294.444	-1.41072	1.17003	-1.20571	0.227929	0.811812	FALSE
ENSECAG00000017991	ARID1A	AT-rich interaction domain 1A	144.728	-1.40712	1.2955	-1.08615	0.277411	0.841947	FALSE
ENSECAG00000015324			445.045	-1.40278	1.13167	-1.23956	0.215136	0.811735	FALSE
ENSECAG00000012399	SUB1	SUB1 regulator of transcription	207.876	-1.40202	1.5865	-0.883718	0.376848	0.885081	FALSE
ENSECAG00000006995	TMEM59	transmembrane protein 59	41.34	-1.39947	2.13122	-0.656655	0.511403	0.943291	FALSE
ENSECAG00000024461	SF3B2	splicing factor 3b subunit 2	1644.27	-1.39545	0.947217	-1.47321	0.140694	0.747932	FALSE
ENSECAG00000034547			480.903	-1.39185	1.16245	-1.19735	0.231172	0.811812	FALSE
ENSECAG00000016986	PPM1B	protein phosphatase, Mg2+/Mn2+ dependent 1B	78.5887	-1.38924	1.7151	-0.810008	0.417936	0.900105	FALSE
ENSECAG00000007006	ANAPC1	anaphase promoting complex subunit 1	27.228	-1.38628	2.19841	-0.63058		1	FALSE
ENSECAG00000019913	FURIN	furin, paired basic amino acid cleaving enzyme	112.586	-1.38374	1.30638	-1.05922	0.289499	0.842038	FALSE
ENSECAG00000016392	RAD21	RAD21 cohesin complex component	129.903	-1.38234	1.53854	-0.898476	0.368932	0.876576	FALSE
ENSECAG00000013331	NAGK	N-acetylglucosamine kinase	495.234	-1.38085	1.55351	-0.888858	0.374079	0.881203	FALSE
ENSECAG00000014575	RB1	RB transcriptional corepressor 1	234.915	-1.37629	1.42625	-0.964968	0.334561	0.865292	FALSE
ENSECAG00000005685	RDH10	retinol dehydrogenase 10	751.521	-1.37474	1.22329	-1.12381	0.261096	0.829809	FALSE
ENSECAG00000000293	MYO3B	myosin IIIB	200.392	-1.37298	1.56016	-0.880024	0.378847	0.885999	FALSE
ENSECAG00000021917	RPP30	ribonuclease P/MRP subunit p30	166.742	-1.37225	1.64665	-0.833356	0.404644	0.89589	FALSE
ENSECAG00000008819	TASOR2	transcription activation suppressor family member 2	297.05	-1.37203	1.45988	-0.939827	0.347306	0.867429	FALSE
ENSECAG00000012838	EPB41L2	erythrocyte membrane protein band 4.1 like 2	931.084	-1.36622	1.0206	-1.33865	0.180686	0.782478	FALSE
ENSECAG00000014563	POLR1F	RNA polymerase I subunit F	1593.41	-1.36167	0.720461	-1.89	0.0587584	0.555536	FALSE
ENSECAG00000014928	RPS13	ribosomal protein S13	190.585	-1.35984	1.38405	-0.982506	0.325851	0.856547	FALSE
ENSECAG00000010027	PEX11A	peroxisomal biosis factor 11 alpha	1123.97	-1.35819	0.930244	-1.46004	0.144279	0.748451	FALSE
ENSECAG00000020161	CCNI	cyclin I	299.764	-1.35699	1.36965	-0.990755	0.321805	0.856281	FALSE
ENSECAG00000013266	PATJ	PATJ crumbs cell polarity complex component	305.793	-1.3531	1.4698	-0.9206	0.357259	0.869797	FALSE
ENSECAG00000000626	PDPK1	3-phosphoinositide dependent protein kinase 1	646.895	-1.35006	1.03253	-1.30752	0.191036	0.78783	FALSE
ENSECAG00000014737	HEATR5B	HEAT repeat containing 5B	437.393	-1.34486	1.39365	-0.964987	0.334551	0.865292	FALSE
ENSECAG00000016652	PPFIBP1	PPFIA binding protein 1	444.285	-1.34386	1.53989	-0.872698	0.382828	0.885999	FALSE
ENSECAG00000010225	GRID2IP	Grid2 interacting protein	22.4747	-1.34379	2.34322	-0.573478		1	FALSE
ENSECAG00000015868	SECISBP2	SECIS binding protein 2	286.665	-1.34337	1.53847	-0.873186	0.382562	0.885999	FALSE
ENSECAG00000012484	NAMPT	nicotinamide phosphoribosyltransferase	67.229	-1.33909	1.78333	-0.750896	0.452716	0.913453	FALSE
ENSECAG00000001815	PYURF	PIGY upstream open reading frame	374.82	-1.33717	1.04708	-1.27705	0.201586	0.802604	FALSE
ENSECAG00000020619	MSX1	msh homeobox 1	78.1205	-1.33065	1.63234	-0.815183	0.414967	0.900105	FALSE
ENSECAG00000022527	FMNL1	formin like 1	69.2112	-1.32867	1.94229	-0.684072	0.49393	0.931828	FALSE
ENSECAG00000011118	GATC	glutamyl-tRNA amidotransferase subunit C	31.4513	-1.32643	2.04873	-0.647438	0.517348	0.943891	FALSE
ENSECAG00000014323	SKA3	spindle and kinetochore associated complex subunit 3	269.83	-1.32603	1.31595	-1.00766	0.313617	0.848444	FALSE
ENSECAG00000008465	STRBP	spermatid perinuclear RNA binding protein	450.108	-1.32563	1.20815	-1.09724	0.272537	0.838118	FALSE
ENSECAG00000014356	GTF3C2	ral transcription factor IIIC subunit 2	142.879	-1.32417	1.85793	-0.712714	0.476023	0.923672	FALSE
ENSECAG00000014912	CCDC91	coiled-coil domain containing 91	1011.27	-1.29912	0.951083	-1.36594	0.171959	0.7722	FALSE
ENSECAG00000022568	TMEM154	transmembrane protein 154	143.04	-1.29804	1.85373	-0.70023	0.483784	0.926974	FALSE
ENSECAG00000021207	THRAP3	thyroid hormone receptor associated protein 3	783.066	-1.29733	0.91408	-1.41927	0.15582	0.75567	FALSE
ENSECAG00000035456			53.39	-1.29525	2.11502	-0.612407		1	FALSE
ENSECAG00000014281	SEPHS1	selenophosphate synthetase 1	83.0958	-1.2937	1.56833	-0.824888	0.409435	0.896189	FALSE
ENSECAG00000009536	YWHAE	tyrosine 3-monooxygenase/tryptophan 5-monooxygenase activation protein epsilon	433.096	-1.2936	1.27701	-1.013	0.311063	0.846916	FALSE
ENSECAG00000019236	LDLRAD3	low density lipoprotein receptor class A domain containing 3	248.206	-1.29236	1.18804	-1.08781	0.276678	0.840818	FALSE
ENSECAG00000012475	SGO1	shugoshin 1	1004.81	-1.28964	1.03138	-1.25041	0.211151	0.806055	FALSE
ENSECAG00000010463	ENTR1	endosome associated trafficking regulator 1	1532.44	-1.28806	1.01922	-1.26376	0.206315	0.802604	FALSE
ENSECAG00000016553	HAUS1	HAUS augmin like complex subunit 1	1279.02	-1.28805	1.1581	-1.11221	0.266047	0.831897	FALSE
ENSECAG00000015464			451.056	-1.28737	0.954937	-1.34812	0.177619	0.776955	FALSE
ENSECAG00000015453	PLA2G12A	phospholipase A2 group XIIA	88.1154	-1.28204	1.72968	-0.741205	0.458569	0.915941	FALSE
ENSECAG00000012016	FAM222B	family with sequence similarity 222 member B	118.82	-1.28053	1.24749	-1.02649	0.30466	0.84365	FALSE
ENSECAG00000021941	STK4	serine/threonine kinase 4	95.4743	-1.28027	1.80926	-0.707618	0.479182	0.925332	FALSE
ENSECAG00000009676	SAP30	Sin3A associated protein 30	318.362	-1.27844	1.1973	-1.06776	0.285627	0.842038	FALSE
ENSECAG00000016873	CPEB1	cytoplasmic polyadenylation element binding protein 1	504.41	-1.27795	1.03083	-1.23974	0.215073	0.811735	FALSE
ENSECAG00000011301	SPINT2	serine peptidase inhibitor, Kunitz type 2	94.5535	-1.2758	1.6677	-0.765008	0.444267	0.913453	FALSE
ENSECAG00000024327	FBXL5	F-box and leucine rich repeat protein 5	346.904	-1.27211	1.42325	-0.893806	0.371426	0.877343	FALSE
ENSECAG00000013706	SMAD6	SMAD family member 6	149.097	-1.26938	1.33478	-0.951003	0.341603	0.867429	FALSE
ENSECAG00000026845	RNF126	ring finger protein 126	1155.49	-1.25931	0.982687	-1.2815	0.200018	0.801119	FALSE
ENSECAG00000013733	HNRNPR	heteroous nuclear ribonucleoprotein R	444.121	-1.25868	1.1026	-1.14156	0.253637	0.828824	FALSE
ENSECAG00000000642	SFPQ	splicing factor proline and glutamine rich	133.769	-1.25802	1.39104	-0.904379	0.365794	0.873919	FALSE
ENSECAG00000002756	AAK1	AP2 associated kinase 1	683.649	-1.2565	0.991145	-1.26773	0.204895	0.802604	FALSE
ENSECAG00000007470	NCAPG	non-SMC condensin I complex subunit G	1389.33	-1.24573	1.01138	-1.23172	0.218054	0.811812	FALSE
ENSECAG00000018413	NUP43	nucleoporin 43	126.821	-1.24382	1.47835	-0.841354	0.40015	0.894608	FALSE
ENSECAG00000038893	CST3	cystatin C	305.373	-1.24067	1.22552	-1.01236	0.311366	0.846916	FALSE
ENSECAG00000011678	TCF12	transcription factor 12	483.747	-1.23996	1.36139	-0.910807	0.362397	0.873919	FALSE
ENSECAG00000012908	NOL9	nucleolar protein 9	313.021	-1.23926	1.42982	-0.866726	0.386092	0.886555	FALSE
ENSECAG00000013979	BICC1	BicC family RNA binding protein 1	378.627	-1.23373	1.09857	-1.12304	0.261421	0.829809	FALSE
ENSECAG00000006331	CLOCK	clock circadian regulator	1903.31	-1.22878	0.802355	-1.53147	0.125654	0.738009	FALSE
ENSECAG00000019546	DDOST	dolichyl-diphosphooligosaccharide--protein glycosyltransferase non-catalytic subunit	132.977	-1.22774	1.53799	-0.798276	0.42471	0.90279	FALSE
ENSECAG00000000749	DLD	dihydrolipoamide dehydrogenase	147.036	-1.22441	1.79207	-0.683237	0.494457	0.932249	FALSE
ENSECAG00000013518	METTL17	methyltransferase like 17	170.267	-1.22335	1.47892	-0.827193	0.408128	0.89589	FALSE
ENSECAG00000038277			64.2885	-1.22293	1.88424	-0.649032	0.516318	0.943891	FALSE
ENSECAG00000018149	RNF20	ring finger protein 20	463.139	-1.22186	1.15805	-1.0551	0.291381	0.84365	FALSE
ENSECAG00000019466	ARIH1	ariadne RBR E3 ubiquitin protein ligase 1	142.796	-1.2208	1.44447	-0.845156	0.398024	0.892927	FALSE
ENSECAG00000036787			311.54	-1.2151	1.52242	-0.798138	0.424791	0.90279	FALSE
ENSECAG00000013139	CACUL1	CDK2 associated cullin domain 1	748.656	-1.21412	1.15787	-1.04858	0.294371	0.84365	FALSE
ENSECAG00000005729	RRAGA	Ras related GTP binding A	243.437	-1.20991	1.21387	-0.996733	0.318894	0.853732	FALSE
ENSECAG00000020636	GALNT11	polypeptide N-acetylgalactosaminyltransferase 11	100.24	-1.20985	1.61781	-0.747834	0.454561	0.913453	FALSE
ENSECAG00000023459	IRF2BP2	interferon regulatory factor 2 binding protein 2	164.866	-1.20688	1.68123	-0.717859	0.472845	0.922771	FALSE
ENSECAG00000011755	GLYATL3	glycine-N-acyltransferase like 3	228.279	-1.20616	1.26991	-0.949805	0.342211	0.867429	FALSE
ENSECAG00000014310	SEC23A	SEC23 homolog A, COPII coat complex component	178.728	-1.19874	1.46774	-0.816726	0.414085	0.900105	FALSE
ENSECAG00000019709	OSTC	oligosaccharyltransferase complex non-catalytic subunit	158.137	-1.19758	1.59015	-0.753123	0.451376	0.913453	FALSE
ENSECAG00000007797	SMARCB1	SWI/SNF related, matrix associated, actin dependent regulator of chromatin, subfamily b, member 1	70.0462	-1.1959	1.77455	-0.673916	0.500365	0.935125	FALSE
ENSECAG00000019725	SYT11	synaptotagmin 11	176.898	-1.19546	1.49913	-0.797437	0.425197	0.90279	FALSE
ENSECAG00000034232			450.262	-1.19409	1.01694	-1.1742	0.240317	0.817986	FALSE
ENSECAG00000000965	ATG2B	autophagy related 2B	197.535	-1.19001	1.53105	-0.777253	0.43701	0.907841	FALSE
ENSECAG00000024578	NFIB	nuclear factor I B	699.97	-1.18349	1.27779	-0.9262	0.354342	0.867429	FALSE
ENSECAG00000007609	CREB3L2	cAMP responsive element binding protein 3 like 2	287.928	-1.18259	1.57027	-0.753111	0.451383	0.913453	FALSE
ENSECAG00000021593	VPS33A	VPS33A core subunit of CORVET and HOPS complexes	63.0625	-1.18167	1.74258	-0.678112	0.497701	0.934816	FALSE
ENSECAG00000013423	RBM39	RNA binding motif protein 39	541.876	-1.1788	1.35803	-0.868025	0.38538	0.885999	FALSE
ENSECAG00000000725	ZMYND11	zinc finger MYND-type containing 11	2605.51	-1.17688	0.713369	-1.64975	0.0989935	0.685339	FALSE
ENSECAG00000007949	AKIP1	A-kinase interacting protein 1	926.439	-1.16941	0.835364	-1.39988	0.161548	0.760409	FALSE
ENSECAG00000008655	DLGAP5	DLG associated protein 5	903.52	-1.16898	0.994986	-1.17488	0.240045	0.817969	FALSE
ENSECAG00000014452	KIF22	kinesin family member 22	446.822	-1.16733	1.35159	-0.863672	0.387768	0.886824	FALSE
ENSECAG00000013583	CD320	CD320 molecule	847.295	-1.16493	1.15049	-1.01255	0.311273	0.846916	FALSE
ENSECAG00000000751	NEDD4L	NEDD4 like E3 ubiquitin protein ligase	348.103	-1.16027	1.39408	-0.832285	0.405248	0.89589	FALSE
ENSECAG00000020350	ZNF622	zinc finger protein 622	314.491	-1.15978	1.18243	-0.980841	0.326671	0.856547	FALSE
ENSECAG00000007274	PLCL1	phospholipase C like 1 (inactive)	358.119	-1.15946	1.68212	-0.68928	0.490647	0.931417	FALSE
ENSECAG00000015395	HERC5	HECT and RLD domain containing E3 ubiquitin protein ligase 5	426.989	-1.15788	1.34383	-0.861629	0.388892	0.887469	FALSE
ENSECAG00000013115	BRD9	bromodomain containing 9	370.141	-1.1574	1.33755	-0.865309	0.386869	0.886824	FALSE
ENSECAG00000005797	SNW1	SNW domain containing 1	1807.74	-1.15449	0.903734	-1.27747	0.201438	0.802604	FALSE
ENSECAG00000020072	FNBP4	formin binding protein 4	530.397	-1.15363	1.32518	-0.870544	0.384003	0.885999	FALSE
ENSECAG00000017149	ZC3H15	zinc finger CCCH-type containing 15	755.514	-1.1491	0.939517	-1.22308	0.2213	0.811812	FALSE
ENSECAG00000000420	BANP	BTG3 associated nuclear protein	117.89	-1.14786	1.54728	-0.741858	0.458174	0.915941	FALSE
ENSECAG00000006526	CENPJ	centromere protein J	156.433	-1.14783	1.69968	-0.675323	0.499471	0.934816	FALSE
ENSECAG00000023203	TYMS	thymidylate synthetase	952.934	-1.13772	0.937149	-1.21402	0.224741	0.811812	FALSE
ENSECAG00000021834	MIOS	meiosis regulator for oocyte development	188.255	-1.13743	1.52626	-0.745244	0.456124	0.91464	FALSE
ENSECAG00000023446	ZNF879	zinc finger protein 879	112.97	-1.13346	1.55906	-0.727016		1	FALSE
ENSECAG00000023795	MOB1B	MOB kinase activator 1B	126.868	-1.13196	1.55785	-0.726614	0.467462	0.922771	FALSE
ENSECAG00000024604	ELF1	E74 like ETS transcription factor 1	814.19	-1.13182	1.22579	-0.923339	0.355831	0.868988	FALSE
ENSECAG00000010880	SOX6	SRY-box transcription factor 6	296.6	-1.13125	1.34248	-0.842656	0.399421	0.894608	FALSE
ENSECAG00000026938	RPL28	ribosomal protein L28	142.729	-1.12672	1.36174	-0.82741	0.408004	0.89589	FALSE
ENSECAG00000017234	ARHGAP17	Rho GTPase activating protein 17	331.266	-1.1253	1.32084	-0.851951	0.394241	0.891632	FALSE
ENSECAG00000019507	SOGA1	suppressor of glucose, autophagy associated 1	43.2107	-1.12038	2.09828	-0.533954	0.593373	0.964898	FALSE
ENSECAG00000029282	UQCRQ	ubiquinol-cytochrome c reductase complex III subunit VII	226.328	-1.12037	1.35233	-0.828477	0.4074	0.89589	FALSE
ENSECAG00000020630	YTHDC2	YTH domain containing 2	516.98	-1.12004	1.35005	-0.829624	0.406752	0.89589	FALSE
ENSECAG00000043373	CCNP	cyclin P	45.6383	-1.11888	1.66647	-0.671405		1	FALSE
ENSECAG00000033757			68.0669	-1.11832	1.7262	-0.647851	0.517082	0.943891	FALSE
ENSECAG00000000466	ELL	elongation factor for RNA polymerase II	192.935	-1.11825	1.59259	-0.702161	0.482579	0.926022	FALSE
ENSECAG00000000346	EDRF1	erythroid differentiation regulatory factor 1	350.752	-1.11642	1.1674	-0.956325	0.338908	0.867429	FALSE
ENSECAG00000015028	TRIM15	tripartite motif containing 15	92.8811	-1.11488	1.79323	-0.621714	0.53413	0.944502	FALSE
ENSECAG00000001667	DEPDC7	DEP domain containing 7	1018.27	-1.11133	0.908119	-1.22378	0.221037	0.811812	FALSE
ENSECAG00000021225	MPRIP	myosin phosphatase Rho interacting protein	239.229	-1.10984	1.40809	-0.788192	0.430584	0.906345	FALSE
ENSECAG00000011763	AHSA1	activator of HSP90 ATPase activity 1	628.349	-1.10796	0.889641	-1.24541	0.212982	0.806055	FALSE
ENSECAG00000014869	PPM1D	protein phosphatase, Mg2+/Mn2+ dependent 1D	235.932	-1.10477	1.3724	-0.804993	0.420824	0.900276	FALSE
ENSECAG00000021791	RCBTB1	RCC1 and BTB domain containing protein 1	721.372	-1.10135	0.953376	-1.15521	0.248003	0.827441	FALSE
ENSECAG00000010391	STK36	serine/threonine kinase 36	183.954	-1.09879	1.46944	-0.747756	0.454608	0.913453	FALSE
ENSECAG00000016814	PPM1A	protein phosphatase, Mg2+/Mn2+ dependent 1A	124.699	-1.09744	1.6216	-0.676763	0.498556	0.934816	FALSE
ENSECAG00000028829			20.1961	-1.09388	2.26957	-0.481979	0.629821	0.964898	FALSE
ENSECAG00000019399	TGS1	trimethylguanosine synthase 1	664.965	-1.09228	1.21471	-0.899211	0.368541	0.876576	FALSE
ENSECAG00000020790	ABHD17B	abhydrolase domain containing 17B, depalmitoylase	41.3246	-1.09195	1.73555	-0.62917	0.529238	0.944502	FALSE
ENSECAG00000021350	SRSF4	serine and arginine rich splicing factor 4	76.22	-1.0898	1.9135	-0.569532		1	FALSE
ENSECAG00000021818	COPA	COPI coat complex subunit alpha	131.394	-1.08875	1.14584	-0.950179	0.342021	0.867429	FALSE
ENSECAG00000013554	ANXA7	annexin A7	193.562	-1.08822	1.5201	-0.715891	0.474059	0.923672	FALSE
ENSECAG00000006636	HENMT1	HEN methyltransferase 1	488.391	-1.08704	1.08072	-1.00585	0.314487	0.849366	FALSE
ENSECAG00000012966	AAAS	aladin WD repeat nucleoporin	79.4423	-1.08295	1.87518	-0.577518	0.56359	0.960984	FALSE
ENSECAG00000016694	THAP9	THAP domain containing 9	110.232	-1.08225	1.85682	-0.582851	0.559994	0.957851	FALSE
ENSECAG00000006788	PCSK5	proprotein convertase subtilisin/kexin type 5	311.336	-1.08112	1.40832	-0.767664	0.442687	0.912778	FALSE
ENSECAG00000001057	MTRFR	mitochondrial translation release factor in rescue	151.493	-1.08096	1.48635	-0.727256	0.467069	0.922771	FALSE
ENSECAG00000020428			662.697	-1.08087	1.15306	-0.937394	0.348556	0.867429	FALSE
ENSECAG00000020011	SLC2A8	solute carrier family 2 member 8	92.1962	-1.0799	1.56246	-0.69115	0.489471	0.931417	FALSE
ENSECAG00000010769	CWC22	CWC22 spliceosome associated protein homolog	605.076	-1.07829	0.845321	-1.2756	0.202098	0.802604	FALSE
ENSECAG00000000235	MTBP	MDM2 binding protein	86.9307	-1.07779	1.78232	-0.604711	0.545371	0.952501	FALSE
ENSECAG00000023731	ABCD3	ATP binding cassette subfamily D member 3	133.663	-1.07731	1.94093	-0.555045		1	FALSE
ENSECAG00000025119	FRYL	FRY like transcription coactivator	123.318	-1.07566	1.69575	-0.634329	0.525866	0.944502	FALSE
ENSECAG00000020871	SENP3	SUMO specific peptidase 3	77.8971	-1.07365	1.81562	-0.591339	0.554293	0.957851	FALSE
ENSECAG00000024630	EPCAM	epithelial cell adhesion molecule	91.3918	-1.07234	1.73344	-0.618619	0.536167	0.944502	FALSE
ENSECAG00000006022	TMEM104	transmembrane protein 104	117.923	-1.07214	1.59135	-0.673733	0.500481	0.935125	FALSE
ENSECAG00000023239	SSR3	signal sequence receptor subunit 3	602.229	-1.07161	1.61379	-0.664034	0.506669	0.940339	FALSE
ENSECAG00000004117			144.781	-1.06996	1.22493	-0.873488	0.382397	0.885999	FALSE
ENSECAG00000000631	TPP2	tripeptidyl peptidase 2	527.28	-1.06736	1.51608	-0.704029	0.481415	0.925332	FALSE
ENSECAG00000011220	CREM	cAMP responsive element modulator	482.179	-1.06512	1.35994	-0.78321	0.433504	0.906345	FALSE
ENSECAG00000037302	OAZ1	ornithine decarboxylase antizyme 1	152.61	-1.06174	1.35215	-0.785222	0.432324	0.906345	FALSE
ENSECAG00000008757	FAAP24	FA core complex associated protein 24	382.94	-1.05971	1.01886	-1.04008	0.298301	0.84365	FALSE
ENSECAG00000018648	NHLRC2	NHL repeat containing 2	191.203	-1.0593	1.54054	-0.687613	0.491697	0.931636	FALSE
ENSECAG00000017118	TLE7	TLE family member 7	1129.92	-1.04186	0.856486	-1.21643	0.223821	0.811812	FALSE
ENSECAG00000017729	RABGAP1	RAB GTPase activating protein 1	194.138	-1.0406	1.71046	-0.608373		1	FALSE
ENSECAG00000023410	UBN2	ubinuclein 2	1511.12	-1.03912	1.15285	-0.901345	0.367405	0.875592	FALSE
ENSECAG00000000471	KIFBP	kinesin family binding protein	143.875	-1.03869	1.57309	-0.660286	0.50907	0.941528	FALSE
ENSECAG00000010574	KLHL7	kelch like family member 7	144.801	-1.03745	1.51418	-0.685151	0.493249	0.931828	FALSE
ENSECAG00000016246	ASAP1	ArfGAP with SH3 domain, ankyrin repeat and PH domain 1	501.983	-1.03275	0.945906	-1.09181	0.274915	0.838723	FALSE
ENSECAG00000010719	RPL35A	ribosomal protein L35a	182.455	-1.03175	1.18861	-0.86803	0.385378	0.885999	FALSE
ENSECAG00000024834	KCMF1	potassium channel modulatory factor 1	97.697	-1.02775	1.50994	-0.680656	0.496089	0.934174	FALSE
ENSECAG00000013740	SSR2	signal sequence receptor subunit 2	115.041	-1.02766	1.74893	-0.587597	0.556803	0.957851	FALSE
ENSECAG00000023935	CPSF2	cleavage and polyadenylation specific factor 2	307.858	-1.02598	1.48185	-0.692366	0.488708	0.931161	FALSE
ENSECAG00000023732	H2AZ1	H2A.Z histone 1	414.871	-1.02574	0.961508	-1.0668	0.28606	0.842038	FALSE
ENSECAG00000022235	LZIC	leucine zipper and CTNNBIP1 domain containing	226.935	-1.02553	1.58844	-0.645624	0.518523	0.943891	FALSE
ENSECAG00000015053	SDCBP	syndecan binding protein	149.164	-1.0213	1.15717	-0.882584	0.377461	0.885081	FALSE
ENSECAG00000019791	RAB11FIP2	RAB11 family interacting protein 2	255.319	-1.0203	1.41494	-0.721093	0.470853	0.922771	FALSE
ENSECAG00000003462	RUNX1	RUNX family transcription factor 1	147.814	-1.01968	1.91127	-0.533511		1	FALSE
ENSECAG00000012019	SETX	senataxin	791.779	-1.01945	1.33816	-0.761824	0.446165	0.913453	FALSE
ENSECAG00000010938	CEP57	centrosomal protein 57	3722.09	-1.01822	0.767736	-1.32626	0.184752	0.78783	FALSE
ENSECAG00000024658	CAP1	cyclase associated actin cytoskeleton regulatory protein 1	29.3499	-1.0167	1.9569	-0.519544	0.603381	0.964898	FALSE
ENSECAG00000012542	COQ2	coenzyme Q2, polyprenyltransferase	1158.24	-1.01613	1.03317	-0.983507	0.325358	0.856547	FALSE
ENSECAG00000015319	NUP37	nucleoporin 37	302.639	-1.01558	1.22591	-0.828429	0.407428	0.89589	FALSE
ENSECAG00000015601	XPR1	xenotropic and polytropic retrovirus receptor 1	181.955	-1.01507	1.47559	-0.687907	0.491511	0.931636	FALSE
ENSECAG00000023692	BCLAF1	BCL2 associated transcription factor 1	414.024	-1.0148	1.47199	-0.689405	0.490568	0.931417	FALSE
ENSECAG00000019097	TANK	TRAF family member associated NFKB activator	2812.76	-1.01295	0.764612	-1.32479	0.18524	0.78783	FALSE
ENSECAG00000004819	DNAH11	dynein axonemal heavy chain 11	125.303	-1.01047	1.59399	-0.633921	0.526132	0.944502	FALSE
ENSECAG00000005590	FAM118B	family with sequence similarity 118 member B	495.643	-1.00983	1.07446	-0.939846	0.347297	0.867429	FALSE
ENSECAG00000012089	BRD2	bromodomain containing 2	829.686	-1.00713	0.884431	-1.13874	0.254813	0.828824	FALSE
ENSECAG00000015767	PPP6C	protein phosphatase 6 catalytic subunit	77.0508	-1.0053	1.82303	-0.551444		1	FALSE
ENSECAG00000009413			114.545	-1.00518	1.25493	-0.800982	0.423142	0.901054	FALSE
ENSECAG00000018723	ATF2	activating transcription factor 2	439.356	-1.00368	1.29682	-0.773951	0.43896	0.908807	FALSE
ENSECAG00000037567			458.8	-0.998702	1.18683	-0.841491	0.400073	0.894608	FALSE
ENSECAG00000032622	HMX1	H6 family homeobox 1	16.1562	-0.997639	2.21679	-0.450038	0.652683	0.97042	FALSE
ENSECAG00000023381	ZNF473	zinc finger protein 473	33.119	-0.995187	2.15651	-0.461481	0.644454	0.968743	FALSE
ENSECAG00000018050			477.947	-0.995116	1.31752	-0.755293	0.450073	0.913453	FALSE
ENSECAG00000020653	TMEM39A	transmembrane protein 39A	269.78	-0.994956	1.23682	-0.804449	0.421138	0.900276	FALSE
ENSECAG00000003029	CDC25C	cell division cycle 25C	931.908	-0.994616	0.893873	-1.1127	0.265835	0.831897	FALSE
ENSECAG00000013436	TCEA1	transcription elongation factor A1	2685.28	-0.989329	0.752525	-1.31468	0.188618	0.78783	FALSE
ENSECAG00000000194	ZMYM5	zinc finger MYM-type containing 5	1723.83	-0.987858	0.871758	-1.13318	0.257139	0.828824	FALSE
ENSECAG00000012930	ALOX5	arachidonate 5-lipoxygenase	189.603	-0.980662	1.85885	-0.527565		1	FALSE
ENSECAG00000020568	VRK3	VRK serine/threonine kinase 3	141.196	-0.979399	1.80725	-0.541927	0.587869	0.964397	FALSE
ENSECAG00000023064	DCAF12	DDB1 and CUL4 associated factor 12	302.927	-0.976637	1.35011	-0.723378	0.469448	0.922771	FALSE
ENSECAG00000012679	RIF1	replication timing regulatory factor 1	367.527	-0.970272	1.54074	-0.629743	0.528863	0.944502	FALSE
ENSECAG00000008583	USF2	upstream transcription factor 2, c-fos interacting	519.618	-0.96984	1.11011	-0.873646	0.382311	0.885999	FALSE
ENSECAG00000023847	RRM1	ribonucleotide reductase catalytic subunit M1	166.071	-0.968968	1.18721	-0.816175	0.4144	0.900105	FALSE
ENSECAG00000017887			143.729	-0.967179	1.53064	-0.631879		1	FALSE
ENSECAG00000010867	FUBP1	far upstream element binding protein 1	155.229	-0.965815	1.49424	-0.646361	0.518046	0.943891	FALSE
ENSECAG00000029415			9.72333	-0.958803	2.63087	-0.364443	0.715527	0.976712	FALSE
ENSECAG00000006138	AIMP1	aminoacyl tRNA synthetase complex interacting multifunctional protein 1	609.356	-0.955737	1.08727	-0.879023	0.379389	0.885999	FALSE
ENSECAG00000000085	AGA	aspartylglucosaminidase	130.724	-0.953841	1.74678	-0.546056	0.585027	0.964397	FALSE
ENSECAG00000022567	RACK1	receptor for activated C kinase 1	1216.84	-0.953694	1.24391	-0.766693	0.443264	0.912778	FALSE
ENSECAG00000021951	RHBDF2	rhomboid 5 homolog 2	750.412	-0.952318	0.838943	-1.13514	0.256316	0.828824	FALSE
ENSECAG00000025040	ZCCHC17	zinc finger CCHC-type containing 17	1020.65	-0.951915	0.943471	-1.00895	0.312999	0.848444	FALSE
ENSECAG00000019897	DDX56	DEAD-box helicase 56	578.597	-0.951008	1.11081	-0.856142	0.391919	0.890329	FALSE
ENSECAG00000012943	MTERF3	mitochondrial transcription termination factor 3	62.9284	-0.950747	1.87777	-0.506316	0.612635	0.964898	FALSE
ENSECAG00000022488			258.269	-0.948361	1.14379	-0.829138	0.407026	0.89589	FALSE
ENSECAG00000017568	TMEM163	transmembrane protein 163	44.9398	-0.948167	1.9296	-0.49138	0.623158	0.964898	FALSE
ENSECAG00000009611	SLC15A4	solute carrier family 15 member 4	317.588	-0.946898	1.24749	-0.759044	0.447826	0.913453	FALSE
ENSECAG00000019992	PIP5K1B	phosphatidylinositol-4-phosphate 5-kinase type 1 beta	218.59	-0.945815	1.3812	-0.684776	0.493485	0.931828	FALSE
ENSECAG00000014368	MCM5	minichromosome maintenance complex component 5	118.808	-0.945136	1.579	-0.598567	0.549462	0.955786	FALSE
ENSECAG00000000138	ACVR2A	activin A receptor type 2A	420.4	-0.945062	1.27453	-0.741498	0.458391	0.915941	FALSE
ENSECAG00000024573			93.0827	-0.942696	1.51023	-0.624208	0.532491	0.944502	FALSE
ENSECAG00000000540	CCDC174	coiled-coil domain containing 174	795.478	-0.940865	1.0503	-0.895806	0.370357	0.877343	FALSE
ENSECAG00000026874	HSPE1	heat shock protein family E (Hsp10) member 1	489.328	-0.9406	1.01013	-0.931171	0.351765	0.867429	FALSE
ENSECAG00000022626	TRMT13	tRNA methyltransferase 13 homolog	217.93	-0.937247	1.42754	-0.656548	0.511471	0.943291	FALSE
ENSECAG00000015107	PHF20L1	PHD finger protein 20 like 1	2893.32	-0.93649	0.903972	-1.03597	0.300215	0.84365	FALSE
ENSECAG00000013263	GPATCH2	G-patch domain containing 2	308.5	-0.93411	1.597	-0.584915	0.558605	0.957851	FALSE
ENSECAG00000020498	C2H1orf174	chromosome 2 C1orf174 homolog	30.9669	-0.933844	2.01743	-0.462888	0.643445	0.968743	FALSE
ENSECAG00000019646	AHI1	Abelson helper integration site 1	3693.5	-0.933116	0.760189	-1.22748	0.219643	0.811812	FALSE
ENSECAG00000017911	PDCD10	programmed cell death 10	131.972	-0.931654	1.74771	-0.533072		1	FALSE
ENSECAG00000007648	TMEM135	transmembrane protein 135	89.6034	-0.931105	1.87826	-0.495729		1	FALSE
ENSECAG00000013777	YBX3	Y-box binding protein 3	192.879	-0.9188	1.68652	-0.544792	0.585897	0.964397	FALSE
ENSECAG00000026909	DNMT1	DNA methyltransferase 1	3288.73	-0.91444	0.83527	-1.09478	0.273612	0.83823	FALSE
ENSECAG00000007388	ADCYAP1R1	ADCYAP receptor type I	168.981	-0.913729	1.97636	-0.46233		1	FALSE
ENSECAG00000022864	COMMD2	COMM domain containing 2	156.218	-0.912257	1.41733	-0.643643	0.519807	0.944502	FALSE
ENSECAG00000013248	L1TD1	LINE1 type transposase domain containing 1	350.717	-0.909471	1.30515	-0.696833	0.485907	0.927558	FALSE
ENSECAG00000023304	XPO7	exportin 7	294.456	-0.909272	1.65524	-0.549329	0.582779	0.964397	FALSE
ENSECAG00000016890	FGFR1OP2	FGFR1 onco partner 2	119.806	-0.907633	1.82486	-0.497371	0.618927	0.964898	FALSE
ENSECAG00000010489	BRMS1	BRMS1 transcriptional repressor and anoikis regulator	102.105	-0.904082	1.6764	-0.539301	0.589679	0.964898	FALSE
ENSECAG00000008466	BIRC5	baculoviral IAP repeat containing 5	360.146	-0.901825	1.2932	-0.697361	0.485577	0.927506	FALSE
ENSECAG00000036991	CMTM7	CKLF like MARVEL transmembrane domain containing 7	218.283	-0.900432	1.22935	-0.732443	0.463898	0.921772	FALSE
ENSECAG00000008638	RERE	arginine-glutamic acid dipeptide repeats	837.394	-0.896263	0.882505	-1.01559	0.309825	0.846916	FALSE
ENSECAG00000033130			242.659	-0.895723	1.30935	-0.684099	0.493913	0.931828	FALSE
ENSECAG00000012657	USP48	ubiquitin specific peptidase 48	328.264	-0.895246	1.53173	-0.584468	0.558906	0.957851	FALSE
ENSECAG00000031940			129.065	-0.894855	1.27947	-0.699393	0.484307	0.92706	FALSE
ENSECAG00000015641	DSCC1	DNA replication and sister chromatid cohesion 1	173.052	-0.893708	1.38057	-0.647346	0.517408	0.943891	FALSE
ENSECAG00000022664	SNX3	sorting nexin 3	193.083	-0.891077	1.50915	-0.59045	0.554889	0.957851	FALSE
ENSECAG00000011173	PPP2CB	protein phosphatase 2 catalytic subunit beta	86.2532	-0.890158	1.80641	-0.492778	0.62217	0.964898	FALSE
ENSECAG00000024129	SLC4A1AP	solute carrier family 4 member 1 adaptor protein	136.393	-0.889114	1.61047	-0.552084	0.580891	0.964397	FALSE
ENSECAG00000022455	PCNT	pericentrin	673.906	-0.875219	1.39755	-0.626253	0.531149	0.944502	FALSE
ENSECAG00000008083	SLC29A1	solute carrier family 29 member 1	50.7046	-0.873509	1.99028	-0.438886		1	FALSE
ENSECAG00000022692	HNRNPDL	heteroous nuclear ribonucleoprotein D like	883.814	-0.871761	1.26989	-0.686483	0.492408	0.931828	FALSE
ENSECAG00000033238	H3-3B	H3.3 histone B	584.247	-0.868135	1.01654	-0.85401	0.393099	0.891501	FALSE
ENSECAG00000019979	RBBP7	RB binding protein 7, chromatin remodeling factor	802.333	-0.867805	0.85427	-1.01584	0.309704	0.846916	FALSE
ENSECAG00000016787			40.7839	-0.867196	1.78352	-0.486226	0.626807	0.964898	FALSE
ENSECAG00000024937	TBC1D21	TBC1 domain family member 21	102.361	-0.863418	1.78271	-0.484328	0.628153	0.964898	FALSE
ENSECAG00000003887	PBX2	PBX homeobox 2	364.365	-0.852923	1.18628	-0.718988	0.472148	0.922771	FALSE
ENSECAG00000015889	KLHL36	kelch like family member 36	148.412	-0.850031	1.55077	-0.548134	0.5836	0.964397	FALSE
ENSECAG00000010440			178.596	-0.848132	1.2094	-0.701281	0.483128	0.926297	FALSE
ENSECAG00000018662	CCDC66	coiled-coil domain containing 66	1017.99	-0.84078	1.24505	-0.675301	0.499485	0.934816	FALSE
ENSECAG00000018222	KDM4A	lysine demethylase 4A	874.392	-0.840292	0.834337	-1.00714	0.313869	0.848444	FALSE
ENSECAG00000023033	RCOR2	REST corepressor 2	40.2485	-0.840162	1.94661	-0.431603		1	FALSE
ENSECAG00000021250	EXD1	exonuclease 3'-5' domain containing 1	134.32	-0.839337	1.56502	-0.536311		1	FALSE
ENSECAG00000010827	TEX15	testis expressed 15, meiosis and synapsis associated	416.208	-0.838368	1.38858	-0.603761	0.546003	0.952501	FALSE
ENSECAG00000024268	RPS26	ribosomal protein S26	507.981	-0.837802	1.18966	-0.704235	0.481287	0.925332	FALSE
ENSECAG00000023738	MED10	mediator complex subunit 10	1382.92	-0.835175	0.797113	-1.04775	0.294754	0.84365	FALSE
ENSECAG00000012670	ANXA2	annexin A2	264.943	-0.830654	1.45772	-0.569831	0.568792	0.963865	FALSE
ENSECAG00000000030	FRA10AC1	FRA10A associated CGG repeat 1	237.99	-0.830398	1.34099	-0.619242	0.535757	0.944502	FALSE
ENSECAG00000040586	LBHD1	LBH domain containing 1	288.337	-0.828698	1.18049	-0.701997	0.482681	0.926022	FALSE
ENSECAG00000011077	MRPS14	mitochondrial ribosomal protein S14	304.23	-0.828127	1.12935	-0.733275	0.463391	0.921361	FALSE
ENSECAG00000000423	USP16	ubiquitin specific peptidase 16	902.246	-0.827422	1.1642	-0.710723	0.477256	0.924096	FALSE
ENSECAG00000022357	EIF4E1B	eukaryotic translation initiation factor 4E family member 1B	1157.51	-0.827037	0.952528	-0.868255	0.385255	0.885999	FALSE
ENSECAG00000037742			350.841	-0.825101	0.874014	-0.944036	0.345151	0.867429	FALSE
ENSECAG00000000260	STAU2	staufen double-stranded RNA binding protein 2	770.109	-0.823978	1.36558	-0.60339	0.546249	0.952501	FALSE
ENSECAG00000017205	CCPG1	cell cycle progression 1	191.953	-0.823392	1.59091	-0.51756	0.604765	0.964898	FALSE
ENSECAG00000002611	ETFA	electron transfer flavoprotein subunit alpha	483.389	-0.823268	1.286	-0.640178	0.522057	0.944502	FALSE
ENSECAG00000036257			370.63	-0.822714	1.41121	-0.582985	0.559903	0.957851	FALSE
ENSECAG00000007787	HP1BP3	heterochromatin protein 1 binding protein 3	363.65	-0.814874	1.14031	-0.714607	0.474852	0.923672	FALSE
ENSECAG00000016465	ZDHHC20	zinc finger DHHC-type palmitoyltransferase 20	104.358	-0.814118	1.60369	-0.507652	0.611697	0.964898	FALSE
ENSECAG00000023820	CTSB	cathepsin B	403.4	-0.813746	1.38699	-0.586699	0.557406	0.957851	FALSE
ENSECAG00000018037	CD2AP	CD2 associated protein	1511.16	-0.811766	0.870893	-0.932108	0.351281	0.867429	FALSE
ENSECAG00000021449	CDK12	cyclin dependent kinase 12	432.999	-0.811587	1.50911	-0.53779	0.590722	0.964898	FALSE
ENSECAG00000023322	ID3	inhibitor of DNA binding 3, HLH protein	842.963	-0.811303	0.91872	-0.88308	0.377193	0.885081	FALSE
ENSECAG00000023466	SLAIN2	SLAIN motif family member 2	2023.35	-0.809074	1.07252	-0.754367	0.450629	0.913453	FALSE
ENSECAG00000017819	NCOA1	nuclear receptor coactivator 1	590.637	-0.80815	1.12464	-0.718587	0.472396	0.922771	FALSE
ENSECAG00000003330	SIRT3	sirtuin 3	89.7486	-0.804255	1.56577	-0.51365	0.607497	0.964898	FALSE
ENSECAG00000004005	TLNRD1	talin rod domain containing 1	53.9557	-0.80202	1.96936	-0.40725	0.683825	0.970911	FALSE
ENSECAG00000008507	SNX7	sorting nexin 7	205.481	-0.801842	1.63142	-0.491499	0.623073	0.964898	FALSE
ENSECAG00000016730			290.963	-0.801365	1.07012	-0.748858	0.453943	0.913453	FALSE
ENSECAG00000009169	MTIF2	mitochondrial translational initiation factor 2	276.118	-0.80034	1.66185	-0.481595	0.630094	0.964898	FALSE
ENSECAG00000015661	BRDT	bromodomain testis associated	820.153	-0.797784	0.84015	-0.949574	0.342329	0.867429	FALSE
ENSECAG00000022176	RC3H2	ring finger and CCCH-type domains 2	137.781	-0.79655	1.57416	-0.506017	0.612844	0.964898	FALSE
ENSECAG00000012282	MPP7	MAGUK p55 scaffold protein 7	429.514	-0.796287	1.49665	-0.532047	0.594693	0.964898	FALSE
ENSECAG00000026813	RPL14	ribosomal protein L14	399.708	-0.794818	1.34334	-0.591675	0.554068	0.957851	FALSE
ENSECAG00000002578	PES1	pescadillo ribosomal biosis factor 1	89.4205	-0.791329	1.77139	-0.446727	0.655072	0.97042	FALSE
ENSECAG00000032204			272.618	-0.790775	1.17058	-0.675543	0.499331	0.934816	FALSE
ENSECAG00000013824	POC5	POC5 centriolar protein	4991.14	-0.788959	0.730512	-1.08001	0.280139	0.842038	FALSE
ENSECAG00000002887	H1-1	H1.1 linker histone, cluster member	2182.74	-0.788487	0.974956	-0.808741	0.418664	0.900276	FALSE
ENSECAG00000004313	SMG7	SMG7 nonsense mediated mRNA decay factor	341.94	-0.788194	1.40697	-0.560209	0.575337	0.964397	FALSE
ENSECAG00000006983	RAPGEF2	Rap guanine nucleotide exchange factor 2	141.744	-0.78729	1.85414	-0.424612	0.67112	0.97042	FALSE
ENSECAG00000024179	EBNA1BP2	EBNA1 binding protein 2	1616.96	-0.787257	0.820996	-0.958906	0.337606	0.867429	FALSE
ENSECAG00000023331	KIF20B	kinesin family member 20B	6568	-0.784843	0.892637	-0.87924	0.379271	0.885999	FALSE
ENSECAG00000019331			891.063	-0.783807	1.05514	-0.742849	0.457573	0.915941	FALSE
ENSECAG00000011501	ZNF215	zinc finger protein 215	51.4114	-0.783453	1.90187	-0.411938	0.680385	0.970911	FALSE
ENSECAG00000011198	AMD1	adenosylmethionine decarboxylase 1	6814.78	-0.782333	0.709655	-1.10241	0.270282	0.834574	FALSE
ENSECAG00000016297	SUPV3L1	Suv3 like RNA helicase	198.059	-0.782294	1.43553	-0.544952	0.585787	0.964397	FALSE
ENSECAG00000011670	RPL13	ribosomal protein L13	936.466	-0.780375	0.773677	-1.00866	0.313139	0.848444	FALSE
ENSECAG00000020833	ZNF226	zinc finger protein 226	177.127	-0.780001	1.72269	-0.45278	0.650707	0.970104	FALSE
ENSECAG00000039653			900.896	-0.778872	0.994277	-0.783355	0.433419	0.906345	FALSE
ENSECAG00000017063	TIMM9	translocase of inner mitochondrial membrane 9	145.064	-0.777828	1.48475	-0.523878	0.600363	0.964898	FALSE
ENSECAG00000024290	ATP6V0B	ATPase H+ transporting V0 subunit b	166.684	-0.77753	1.59735	-0.486761	0.626427	0.964898	FALSE
ENSECAG00000007762	TRIM59	tripartite motif containing 59	478.872	-0.776964	1.23615	-0.628536	0.529653	0.944502	FALSE
ENSECAG00000015910	KTN1	kinectin 1	1154.91	-0.776125	0.945803	-0.820599	0.411875	0.900076	FALSE
ENSECAG00000016136	ADIPOR2	adiponectin receptor 2	472.521	-0.776119	1.22438	-0.633886	0.526155	0.944502	FALSE
ENSECAG00000012435	FAM177A1	family with sequence similarity 177 member A1	500.894	-0.774577	1.24414	-0.622578	0.533562	0.944502	FALSE
ENSECAG00000013129	TOP1MT	DNA topoisomerase I mitochondrial	1201.35	-0.772961	1.25987	-0.613524	0.53953	0.945339	FALSE
ENSECAG00000011686	ACVR1B	activin A receptor type 1B	58.1292	-0.771904	1.79014	-0.431197	0.666325	0.97042	FALSE
ENSECAG00000013843	TUBE1	tubulin epsilon 1	881.918	-0.770926	0.875673	-0.88038	0.378653	0.885999	FALSE
ENSECAG00000005675	NFE2L2	NFE2 like bZIP transcription factor 2	1067.73	-0.768644	0.984342	-0.780871	0.434878	0.907108	FALSE
ENSECAG00000011899	PNN	pinin, desmosome associated protein	769.207	-0.765966	1.18298	-0.647491	0.517314	0.943891	FALSE
ENSECAG00000021355	STAM2	signal transducing adaptor molecule 2	327.935	-0.765492	1.36542	-0.560627	0.575052	0.964397	FALSE
ENSECAG00000012794	LYAR	Ly1 antibody reactive	1312.01	-0.764631	0.862058	-0.886984	0.375088	0.882898	FALSE
ENSECAG00000000480	ABI3BP	ABI family member 3 binding protein	1178.49	-0.762481	0.906419	-0.841202	0.400235	0.894608	FALSE
ENSECAG00000016792			720.881	-0.753659	0.913213	-0.825283	0.409211	0.896189	FALSE
ENSECAG00000021949	RAD54B	RAD54 homolog B	396.133	-0.753018	1.22744	-0.613486	0.539555	0.945339	FALSE
ENSECAG00000024577	KLHL18	kelch like family member 18	158.059	-0.748744	1.58338	-0.472878	0.6363	0.966325	FALSE
ENSECAG00000023011	RIPK2	receptor interacting serine/threonine kinase 2	413.178	-0.747696	1.20215	-0.621968	0.533963	0.944502	FALSE
ENSECAG00000016829	ABTB2	ankyrin repeat and BTB domain containing 2	71.4278	-0.745819	1.46636	-0.50862	0.611019	0.964898	FALSE
ENSECAG00000017498	KRR1	KRR1 small subunit processome component homolog	587.184	-0.745598	1.46664	-0.508371	0.611193	0.964898	FALSE
ENSECAG00000009694	IWS1	interacts with SUPT6H, CTD assembly factor 1	3310.65	-0.745317	0.829516	-0.898496	0.368921	0.876576	FALSE
ENSECAG00000014536	KIF23	kinesin family member 23	2459.89	-0.742549	1.19483	-0.621469	0.534291	0.944502	FALSE
ENSECAG00000017504	QKI	QKI, KH domain containing RNA binding	984.318	-0.741517	1.11531	-0.664852	0.506145	0.940339	FALSE
ENSECAG00000015387	MYLK	myosin light chain kinase	905.822	-0.738522	0.844883	-0.874112	0.382057	0.885999	FALSE
ENSECAG00000016551	RAB13	RAB13, member RAS onco family	72.3201	-0.737192	1.83251	-0.402285		1	FALSE
ENSECAG00000011409	TIMM44	translocase of inner mitochondrial membrane 44	1282.7	-0.736686	0.851676	-0.864985	0.387047	0.886824	FALSE
ENSECAG00000022984	ZFHX3	zinc finger homeobox 3	810.903	-0.734971	0.910065	-0.807603	0.419319	0.900276	FALSE
ENSECAG00000006637	NECTIN3	nectin cell adhesion molecule 3	1903.17	-0.733901	0.922749	-0.795342	0.426415	0.903621	FALSE
ENSECAG00000008341	PLAGL2	PLAG1 like zinc finger 2	55.5337	-0.729443	1.81725	-0.4014	0.688125	0.970911	FALSE
ENSECAG00000024086	PSMA1	proteasome 20S subunit alpha 1	69.6042	-0.726827	1.82218	-0.398878	0.689983	0.970911	FALSE
ENSECAG00000040232	GPATCH8	G-patch domain containing 8	836.444	-0.72653	0.877315	-0.828129	0.407598	0.89589	FALSE
ENSECAG00000024126	RFC1	replication factor C subunit 1	608.629	-0.725728	1.25215	-0.579584	0.562195	0.959464	FALSE
ENSECAG00000029647			2402.91	-0.723678	0.915343	-0.790609	0.429172	0.906345	FALSE
ENSECAG00000008319	FYN	FYN proto-onco, Src family tyrosine kinase	47.7398	-0.721088	2.07603	-0.34734	0.728336	0.979991	FALSE
ENSECAG00000019039	CNST	consortin, connexin sorting protein	457.029	-0.720275	1.49097	-0.483092	0.62903	0.964898	FALSE
ENSECAG00000019810	KIF2A	kinesin family member 2A	425.978	-0.719889	1.45507	-0.494745	0.62078	0.964898	FALSE
ENSECAG00000020254	LMO1	LIM domain only 1	115.442	-0.717896	1.59996	-0.448696	0.653651	0.97042	FALSE
ENSECAG00000015275			149.858	-0.717809	1.38824	-0.517062	0.605113	0.964898	FALSE
ENSECAG00000001674	ZSWIM3	zinc finger SWIM-type containing 3	315.283	-0.716172	1.18703	-0.603332	0.546288	0.952501	FALSE
ENSECAG00000026987	NDUFA4	NDUFA4 mitochondrial complex associated	101.445	-0.713002	1.45981	-0.488422	0.625251	0.964898	FALSE
ENSECAG00000017154	RPL10	ribosomal protein L10	126.579	-0.712499	1.66668	-0.427496	0.669018	0.97042	FALSE
ENSECAG00000040578	FAM219B	family with sequence similarity 219 member B	123.339	-0.711008	1.62394	-0.437828	0.661511	0.97042	FALSE
ENSECAG00000012365	VDAC1	voltage dependent anion channel 1	343.596	-0.708702	1.4808	-0.478592	0.632229	0.964898	FALSE
ENSECAG00000023078	ORMDL3	ORMDL sphingolipid biosynthesis regulator 3	66.9007	-0.708162	1.62651	-0.435388	0.663281	0.97042	FALSE
ENSECAG00000009430	C13H16orf72	chromosome 13 C16orf72 homolog	309.892	-0.701628	1.49632	-0.468903	0.639139	0.966765	FALSE
ENSECAG00000021249	TRIM33	tripartite motif containing 33	568.489	-0.699789	1.19687	-0.584681	0.558762	0.957851	FALSE
ENSECAG00000020208	LIFR	LIF receptor subunit alpha	36.2361	-0.698052	2.04117	-0.341986		1	FALSE
ENSECAG00000016800	PRRC2C	proline rich coiled-coil 2C	4529.18	-0.691135	0.791798	-0.872867	0.382735	0.885999	FALSE
ENSECAG00000007453	PCGF2	polycomb group ring finger 2	38.856	-0.690691	2.02408	-0.341237		1	FALSE
ENSECAG00000008769	VAPA	VAMP associated protein A	242.822	-0.689681	1.17226	-0.588336	0.556307	0.957851	FALSE
ENSECAG00000019132	SLMAP	sarcolemma associated protein	281.607	-0.688261	1.44236	-0.477176	0.633237	0.965594	FALSE
ENSECAG00000013380			61.5506	-0.687441	1.78545	-0.385025	0.700219	0.970911	FALSE
ENSECAG00000005101	FAM104A	family with sequence similarity 104 member A	346.704	-0.685526	0.951284	-0.720632	0.471136	0.922771	FALSE
ENSECAG00000023972	AGO4	argonaute RISC component 4	95.7211	-0.68543	1.56789	-0.437167	0.66199	0.97042	FALSE
ENSECAG00000010723	ANGEL2	angel homolog 2	322.287	-0.683403	1.32739	-0.514848	0.60666	0.964898	FALSE
ENSECAG00000020261	BRD1	bromodomain containing 1	628.712	-0.683037	1.03366	-0.660796	0.508743	0.941528	FALSE
ENSECAG00000019104	REN	renin	371.861	-0.681331	1.41087	-0.482914	0.629157	0.964898	FALSE
ENSECAG00000011717	UBAC1	UBA domain containing 1	325.128	-0.678916	1.43158	-0.474242	0.635327	0.966325	FALSE
ENSECAG00000014550	AP2A2	adaptor related protein complex 2 subunit alpha 2	97.0329	-0.677463	1.45055	-0.46704	0.640472	0.968302	FALSE
ENSECAG00000014432			21.4883	-0.677282	1.89575	-0.357264	0.720894	0.979546	FALSE
ENSECAG00000021209	CRELD2	cysteine rich with EGF like domains 2	941.52	-0.676755	1.09412	-0.618539	0.53622	0.944502	FALSE
ENSECAG00000009655	SINHCAF	SIN3-HDAC complex associated factor	1392.28	-0.676268	0.817403	-0.827338	0.408046	0.89589	FALSE
ENSECAG00000023791	SLC16A11	solute carrier family 16 member 11	58.7143	-0.674462	1.72074	-0.391961		1	FALSE
ENSECAG00000010483	NFATC2IP	nuclear factor of activated T cells 2 interacting protein	163.101	-0.670134	1.62231	-0.413073	0.679553	0.970911	FALSE
ENSECAG00000010951	DNAAF4	dynein axonemal assembly factor 4	806.992	-0.669417	1.175	-0.569717	0.568869	0.963865	FALSE
ENSECAG00000016926	GABPB1	GA binding protein transcription factor subunit beta 1	310.742	-0.667438	1.12266	-0.594514	0.552168	0.957655	FALSE
ENSECAG00000004882	CSNK1A1	casein kinase 1 alpha 1	1231.71	-0.659726	0.934032	-0.70632	0.479989	0.925332	FALSE
ENSECAG00000043510			63.6687	-0.65937	1.67929	-0.392648	0.694579	0.970911	FALSE
ENSECAG00000014289	ARHGAP12	Rho GTPase activating protein 12	1494.98	-0.655719	1.18161	-0.554937	0.578938	0.964397	FALSE
ENSECAG00000018272	LAP3	leucine aminopeptidase 3	330.588	-0.654393	1.36486	-0.47946	0.631612	0.964898	FALSE
ENSECAG00000024976	OCIAD1	OCIA domain containing 1	491.368	-0.652634	1.08944	-0.599055	0.549136	0.955786	FALSE
ENSECAG00000024659	PRRC1	proline rich coiled-coil 1	52.9459	-0.652384	1.6691	-0.390861	0.6959	0.970911	FALSE
ENSECAG00000005944	MPHOSPH10	M-phase phosphoprotein 10	182.303	-0.652148	1.6171	-0.403284	0.68674	0.970911	FALSE
ENSECAG00000023629	GJC1	gap junction protein gamma 1	1223.8	-0.651791	1.0608	-0.614431	0.53893	0.945339	FALSE
ENSECAG00000002814	TOB1	transducer of ERBB2, 1	663.695	-0.649865	1.04695	-0.620724	0.534781	0.944502	FALSE
ENSECAG00000028129			115.452	-0.646252	1.25573	-0.514643	0.606802	0.964898	FALSE
ENSECAG00000013062	RPSA	ribosomal protein SA	323.62	-0.644989	1.15798	-0.556993	0.577532	0.964397	FALSE
ENSECAG00000001897			92.183	-0.643958	1.45532	-0.442485	0.658138	0.97042	FALSE
ENSECAG00000017144	CTNNBL1	catenin beta like 1	224.888	-0.639208	1.85517	-0.344555	0.730429	0.979991	FALSE
ENSECAG00000037138	ATP6V1G1	ATPase H+ transporting V1 subunit G1	109.453	-0.637071	1.8473	-0.344867	0.730195	0.979991	FALSE
ENSECAG00000001468	VBP1	VHL binding protein 1	1695.81	-0.629824	0.796778	-0.790464	0.429257	0.906345	FALSE
ENSECAG00000024437	CUL5	cullin 5	877.35	-0.628406	1.22835	-0.511585	0.608941	0.964898	FALSE
ENSECAG00000003236	GTF2A1	ral transcription factor IIA subunit 1	500.247	-0.627851	1.15756	-0.542393	0.587548	0.964397	FALSE
ENSECAG00000024605	SIN3A	SIN3 transcription regulator family member A	1097.59	-0.625999	0.795408	-0.787017	0.431272	0.906345	FALSE
ENSECAG00000004992	POFUT2	protein O-fucosyltransferase 2	343.235	-0.624932	1.60654	-0.388993	0.697281	0.970911	FALSE
ENSECAG00000011547			636.979	-0.622387	1.21436	-0.512521	0.608286	0.964898	FALSE
ENSECAG00000013993	TOMM40	translocase of outer mitochondrial membrane 40	198.059	-0.622109	1.68623	-0.368934	0.712177	0.97585	FALSE
ENSECAG00000005853	TAF5	TATA-box binding protein associated factor 5	849.45	-0.621083	0.94234	-0.659086	0.50984	0.941528	FALSE
ENSECAG00000013845	HUS1	HUS1 checkpoint clamp component	404.907	-0.620737	1.25739	-0.49367	0.621539	0.964898	FALSE
ENSECAG00000031496	C3H16orf74	chromosome 3 C16orf74 homolog	48.9205	-0.62035	1.68753	-0.367609	0.713165	0.97585	FALSE
ENSECAG00000008052	SDE2	SDE2 telomere maintenance homolog	225.991	-0.618837	1.59249	-0.388597	0.697574	0.970911	FALSE
ENSECAG00000021097	ACIN1	apoptotic chromatin condensation inducer 1	225.049	-0.609058	1.44851	-0.420473	0.67414	0.97042	FALSE
ENSECAG00000019460	MPPED2	metallophosphoesterase domain containing 2	680.423	-0.608694	0.863535	-0.704887	0.480881	0.925332	FALSE
ENSECAG00000043329			1041.46	-0.607703	0.921628	-0.65938	0.509652	0.941528	FALSE
ENSECAG00000009195	ARL5B	ADP ribosylation factor like GTPase 5B	64.8145	-0.607092	1.87943	-0.323019	0.746681	0.984297	FALSE
ENSECAG00000014582	UFL1	UFM1 specific ligase 1	2883.55	-0.606766	0.754535	-0.804158	0.421306	0.900276	FALSE
ENSECAG00000010814			104.384	-0.606374	1.41457	-0.428663	0.668168	0.97042	FALSE
ENSECAG00000005798	CNOT7	CCR4-NOT transcription complex subunit 7	151.381	-0.606335	1.28954	-0.470193	0.638217	0.966325	FALSE
ENSECAG00000020253	RPS7	ribosomal protein S7	503.117	-0.605572	1.20118	-0.504146	0.614159	0.964898	FALSE
ENSECAG00000026912	CENPH	centromere protein H	669.586	-0.605001	0.955438	-0.633219	0.526591	0.944502	FALSE
ENSECAG00000002746	BRAF	B-Raf proto-onco, serine/threonine kinase	240.398	-0.602455	1.41336	-0.426257	0.669921	0.97042	FALSE
ENSECAG00000000042	ZC3H11A	zinc finger CCCH-type containing 11A	370.833	-0.601648	1.42277	-0.422871	0.67239	0.97042	FALSE
ENSECAG00000011257	MXD1	MAX dimerization protein 1	275.895	-0.600315	1.43982	-0.416938	0.676724	0.97042	FALSE
ENSECAG00000009621	INCENP	inner centromere protein	43.5349	-0.600224	1.94639	-0.308379	0.757794	0.986685	FALSE
ENSECAG00000012464	SYNCRIP	synaptotagmin binding cytoplasmic RNA interacting protein	593.555	-0.596465	1.42817	-0.417643	0.676208	0.97042	FALSE
ENSECAG00000016641	NBAS	NBAS subunit of NRZ tethering complex	710.265	-0.596257	1.38635	-0.430091	0.667129	0.97042	FALSE
ENSECAG00000007134	AP2A1	adaptor related protein complex 2 subunit alpha 1	22.1622	-0.593528	2.02701	-0.292809	0.769668	0.990822	FALSE
ENSECAG00000023585	SATB1	SATB homeobox 1	522.291	-0.592461	0.966831	-0.612787	0.540017	0.945339	FALSE
ENSECAG00000019178	ERH	ERH mRNA splicing and mitosis factor	164.035	-0.589923	1.46066	-0.403874	0.686305	0.970911	FALSE
ENSECAG00000010871	TMEM126B	transmembrane protein 126B	60.1142	-0.587588	1.66528	-0.352847	0.724203	0.979908	FALSE
ENSECAG00000009502	AASDH	aminoadipate-semialdehyde dehydrogenase	971.356	-0.584423	1.17456	-0.497569	0.618788	0.964898	FALSE
ENSECAG00000023726	UBAP2	ubiquitin associated protein 2	546.212	-0.57907	1.06283	-0.544838	0.585865	0.964397	FALSE
ENSECAG00000020448	UBE2T	ubiquitin conjugating enzyme E2 T	1150.15	-0.577231	1.22389	-0.471635	0.637187	0.966325	FALSE
ENSECAG00000020969	HBP1	HMG-box transcription factor 1	230.8	-0.571417	1.56613	-0.364859	0.715217	0.976712	FALSE
ENSECAG00000015959	MYBL1	MYB proto-onco like 1	535.943	-0.567525	1.0946	-0.518476	0.604126	0.964898	FALSE
ENSECAG00000011567	UIMC1	ubiquitin interaction motif containing 1	645.185	-0.567427	1.13648	-0.499286	0.617578	0.964898	FALSE
ENSECAG00000012884	CLTA	clathrin light chain A	248.518	-0.567231	1.71383	-0.330973	0.740665	0.982842	FALSE
ENSECAG00000013614	H1-8	H1.8 linker histone	1065.36	-0.567022	0.771849	-0.734629	0.462566	0.921361	FALSE
ENSECAG00000019975	LEF1	lymphoid enhancer binding factor 1	169.624	-0.566634	1.69703	-0.333898		1	FALSE
ENSECAG00000015237	PIBF1	progesterone immunomodulatory binding factor 1	340.854	-0.56309	1.45207	-0.387786	0.698175	0.970911	FALSE
ENSECAG00000000311	EIF4ENIF1	eukaryotic translation initiation factor 4E nuclear import factor 1	908.803	-0.561801	1.32256	-0.424782	0.670996	0.97042	FALSE
ENSECAG00000041663			80.9047	-0.561065	1.30548	-0.429777	0.667358	0.97042	FALSE
ENSECAG00000007206	UBE2O	ubiquitin conjugating enzyme E2 O	98.9149	-0.560307	1.62024	-0.345817	0.72948	0.979991	FALSE
ENSECAG00000012900	MSN	moesin	565.552	-0.559007	1.14778	-0.487034	0.626234	0.964898	FALSE
ENSECAG00000010129	RAD9A	RAD9 checkpoint clamp component A	32.307	-0.558308	2.14069	-0.260808	0.794241	0.9912	FALSE
ENSECAG00000023826	ZFAND5	zinc finger AN1-type containing 5	598.513	-0.555103	1.07312	-0.517281	0.60496	0.964898	FALSE
ENSECAG00000030196			143.143	-0.554704	1.41628	-0.391662	0.695308	0.970911	FALSE
ENSECAG00000012770	ALDH9A1	aldehyde dehydrogenase 9 family member A1	990.267	-0.551975	1.11938	-0.493106	0.621938	0.964898	FALSE
ENSECAG00000011789	RPAIN	RPA interacting protein	141.242	-0.5514	1.72013	-0.320557	0.748546	0.984297	FALSE
ENSECAG00000011978	LRR1	leucine rich repeat protein 1	216.295	-0.55007	1.48978	-0.36923	0.711956	0.97585	FALSE
ENSECAG00000015993	MRPL30	mitochondrial ribosomal protein L30	585.038	-0.550069	0.813332	-0.676316	0.49884	0.934816	FALSE
ENSECAG00000016212	SDAD1	SDA1 domain containing 1	215.471	-0.548405	1.53437	-0.357413	0.720782	0.979546	FALSE
ENSECAG00000015670	DHX30	DExH-box helicase 30	224.908	-0.547656	1.46147	-0.374729	0.707862	0.973947	FALSE
ENSECAG00000017881	CDC42BPA	CDC42 binding protein kinase alpha	416.025	-0.547055	1.13655	-0.48133	0.630282	0.964898	FALSE
ENSECAG00000011027	CFAP20	cilia and flagella associated protein 20	159.812	-0.546292	1.05595	-0.517346	0.604915	0.964898	FALSE
ENSECAG00000012286	DDX52	DExD-box helicase 52	407.633	-0.545935	1.07046	-0.510001	0.610051	0.964898	FALSE
ENSECAG00000001669			295.486	-0.544011	1.15594	-0.470624	0.637909	0.966325	FALSE
ENSECAG00000008787	CCNB3	cyclin B3	418.433	-0.543486	1.36887	-0.397033	0.691343	0.970911	FALSE
ENSECAG00000005758	EIF1B	eukaryotic translation initiation factor 1B	269.453	-0.541555	0.972797	-0.556699	0.577733	0.964397	FALSE
ENSECAG00000015838	ST13	ST13 Hsp70 interacting protein	507.839	-0.540241	1.20378	-0.448787	0.653585	0.97042	FALSE
ENSECAG00000011679	TALDO1	transaldolase 1	267.511	-0.539038	1.23572	-0.436212	0.662683	0.97042	FALSE
ENSECAG00000024608	SREBF2	sterol regulatory element binding transcription factor 2	213.393	-0.538851	1.40339	-0.383963	0.701006	0.970911	FALSE
ENSECAG00000013193	UHRF1	ubiquitin like with PHD and ring finger domains 1	1625.61	-0.538076	0.720578	-0.746729	0.455227	0.913453	FALSE
ENSECAG00000013213	BRD7	bromodomain containing 7	1292.73	-0.535477	1.02313	-0.523371	0.600716	0.964898	FALSE
ENSECAG00000020528	TJP1	tight junction protein 1	447.308	-0.531152	1.39513	-0.380717	0.703413	0.970911	FALSE
ENSECAG00000029274			152.783	-0.529926	1.10289	-0.480487	0.630881	0.964898	FALSE
ENSECAG00000001700	GTPBP4	GTP binding protein 4	523.368	-0.526221	1.35003	-0.389786	0.696695	0.970911	FALSE
ENSECAG00000024130	ZNF609	zinc finger protein 609	922.07	-0.52545	0.941542	-0.558074	0.576794	0.964397	FALSE
ENSECAG00000006920	SRP72	signal recognition particle 72	1164.44	-0.525199	0.969071	-0.541961	0.587845	0.964397	FALSE
ENSECAG00000028365	BTBD18	BTB domain containing 18	34.5157	-0.523998	1.89229	-0.276913	0.781847	0.9912	FALSE
ENSECAG00000007562	AUNIP	aurora kinase A and ninein interacting protein	800.629	-0.519647	0.819855	-0.633828	0.526193	0.944502	FALSE
ENSECAG00000014953	KIF15	kinesin family member 15	2295.91	-0.518775	0.943775	-0.549681	0.582538	0.964397	FALSE
ENSECAG00000016918	TMED4	transmembrane p24 trafficking protein 4	695.137	-0.517013	0.897661	-0.575956	0.564645	0.961056	FALSE
ENSECAG00000021380	RBMX	RNA binding motif protein X-linked	2280.55	-0.514951	0.970385	-0.530667	0.595649	0.964898	FALSE
ENSECAG00000015816	RPLP0	ribosomal protein lateral stalk subunit P0	789.817	-0.51322	1.02567	-0.500373	0.616812	0.964898	FALSE
ENSECAG00000000554	KPNA7	karyopherin subunit alpha 7	802.843	-0.511575	1.02714	-0.498057	0.618444	0.964898	FALSE
ENSECAG00000016078	CSGALNACT2	chondroitin sulfate N-acetylgalactosaminyltransferase 2	142.992	-0.510631	1.63686	-0.311957	0.755073	0.986685	FALSE
ENSECAG00000008506	HMMR	hyaluronan mediated motility receptor	1395.68	-0.510117	0.946096	-0.539181	0.589762	0.964898	FALSE
ENSECAG00000039232			2055.28	-0.507678	0.793551	-0.639755	0.522332	0.944502	FALSE
ENSECAG00000033879			48.8237	-0.505797	1.42102	-0.355938	0.721887	0.979589	FALSE
ENSECAG00000000689	PPP4R2	protein phosphatase 4 regulatory subunit 2	1540.71	-0.50315	0.941598	-0.534357	0.593094	0.964898	FALSE
ENSECAG00000006122	TRAPPC4	trafficking protein particle complex subunit 4	149.855	-0.502773	1.27157	-0.395396	0.69255	0.970911	FALSE
ENSECAG00000009936	TCERG1	transcription elongation regulator 1	4179.24	-0.502675	0.909497	-0.552695		1	FALSE
ENSECAG00000021238	IGF1R	insulin like growth factor 1 receptor	928.944	-0.496456	1.0219	-0.485818	0.627096	0.964898	FALSE
ENSECAG00000007050	WDR7	WD repeat domain 7	208.391	-0.494905	1.62614	-0.304344	0.760866	0.986964	FALSE
ENSECAG00000007221	GORAB	golgin, RAB6 interacting	81.2745	-0.494426	1.89379	-0.261078	0.794033	0.9912	FALSE
ENSECAG00000020699			1639.74	-0.492278	0.869736	-0.566008	0.571388	0.964397	FALSE
ENSECAG00000009218	EGFL6	EGF like domain multiple 6	284.205	-0.488031	1.20697	-0.404344	0.68596	0.970911	FALSE
ENSECAG00000020821	MAGOH	mago homolog, exon junction complex subunit	2652.35	-0.487891	0.761539	-0.640665	0.52174	0.944502	FALSE
ENSECAG00000000378	PABPN1L	PABPN1 like, cytoplasmic	97.6878	-0.485358	1.49677	-0.32427	0.745733	0.984297	FALSE
ENSECAG00000022534	SMARCE1	SWI/SNF related, matrix associated, actin dependent regulator of chromatin, subfamily e, member 1	1642.53	-0.484784	0.786201	-0.616616	0.537488	0.944502	FALSE
ENSECAG00000022986	CNDP1	carnosine dipeptidase 1	86.3383	-0.481744	1.8403	-0.261775	0.793495	0.9912	FALSE
ENSECAG00000009635	CDC27	cell division cycle 27	694.95	-0.479732	0.984584	-0.487244	0.626086	0.964898	FALSE
ENSECAG00000025100	DHX36	DEAH-box helicase 36	486.005	-0.475604	1.40589	-0.338295	0.735141	0.981147	FALSE
ENSECAG00000005508	SPATS2	spermatosis associated serine rich 2	436.143	-0.47397	1.28972	-0.367498	0.713248	0.97585	FALSE
ENSECAG00000018923	RBFOX2	RNA binding fox-1 homolog 2	806.805	-0.47212	1.2344	-0.38247	0.702113	0.970911	FALSE
ENSECAG00000021359	RTN3	reticulon 3	1074.83	-0.468312	0.992297	-0.471948	0.636964	0.966325	FALSE
ENSECAG00000015046	TFAP2B	transcription factor AP-2 beta	1370.84	-0.467785	0.816999	-0.572565	0.566939	0.962421	FALSE
ENSECAG00000039033	MTARC1	mitochondrial amidoxime reducing component 1	72.9051	-0.466503	1.74781	-0.266907	0.789541	0.9912	FALSE
ENSECAG00000018267	CENPC	centromere protein C	1006.01	-0.464831	0.95436	-0.487061	0.626215	0.964898	FALSE
ENSECAG00000013359	LRRC8A	leucine rich repeat containing 8 VRAC subunit A	4429.88	-0.463235	0.787348	-0.588349	0.556298	0.957851	FALSE
ENSECAG00000017777	PLK1	polo like kinase 1	296.467	-0.463015	1.41919	-0.326254	0.744232	0.983928	FALSE
ENSECAG00000012960	IRAK2	interleukin 1 receptor associated kinase 2	75.9217	-0.460122	1.66644	-0.27611	0.782464	0.9912	FALSE
ENSECAG00000008744	UHMK1	U2AF homology motif kinase 1	768.058	-0.459287	1.0531	-0.436128	0.662744	0.97042	FALSE
ENSECAG00000013269			703.658	-0.457649	1.06115	-0.431278	0.666267	0.97042	FALSE
ENSECAG00000035662			99.7239	-0.454366	1.14721	-0.396063	0.692059	0.970911	FALSE
ENSECAG00000015008	BRI3BP	BRI3 binding protein	759.968	-0.454025	0.943692	-0.481116	0.630434	0.964898	FALSE
ENSECAG00000014517	CDCA3	cell division cycle associated 3	299.513	-0.453249	1.18629	-0.382073	0.702407	0.970911	FALSE
ENSECAG00000008939	RBM17	RNA binding motif protein 17	690.651	-0.452896	0.788101	-0.574667	0.565516	0.961912	FALSE
ENSECAG00000016647	UBE2Q1	ubiquitin conjugating enzyme E2 Q1	245.46	-0.451607	1.34377	-0.336073	0.736816	0.981147	FALSE
ENSECAG00000020945	MNS1	meiosis specific nuclear structural 1	735.467	-0.450107	1.06906	-0.421029	0.673734	0.97042	FALSE
ENSECAG00000015783	PTBP2	polypyrimidine tract binding protein 2	43.9803	-0.44762	1.78266	-0.251097	0.801739	0.9912	FALSE
ENSECAG00000014236			194.08	-0.446992	1.2864	-0.347475	0.728234	0.979991	FALSE
ENSECAG00000017689	ARHGEF28	Rho guanine nucleotide exchange factor 28	350.807	-0.446093	1.10004	-0.405525	0.685092	0.970911	FALSE
ENSECAG00000012226	CPLANE1	ciliogenesis and planar polarity effector complex subunit 1	267.457	-0.446	1.65832	-0.268946	0.787971	0.9912	FALSE
ENSECAG00000010765	ACSL3	acyl-CoA synthetase long chain family member 3	3499.74	-0.44262	0.986057	-0.448879	0.653519	0.97042	FALSE
ENSECAG00000010836	ZBTB38	zinc finger and BTB domain containing 38	1133.67	-0.441492	0.972954	-0.453764	0.649999	0.970104	FALSE
ENSECAG00000033153			567.438	-0.440524	0.852966	-0.516462	0.605532	0.964898	FALSE
ENSECAG00000022544	KMT2C	lysine methyltransferase 2C	1695.28	-0.438516	0.880357	-0.498112	0.618405	0.964898	FALSE
ENSECAG00000015952	BDNF	brain derived neurotrophic factor	250.906	-0.438232	1.4232	-0.30792	0.758143	0.986685	FALSE
ENSECAG00000013272	MRPS22	mitochondrial ribosomal protein S22	420.037	-0.434282	1.04684	-0.414851	0.678251	0.970911	FALSE
ENSECAG00000029472			722.176	-0.429835	0.832283	-0.516453	0.605538	0.964898	FALSE
ENSECAG00000020900	CEP95	centrosomal protein 95	295.08	-0.428509	1.74496	-0.245569		1	FALSE
ENSECAG00000019809	CGAS	cyclic GMP-AMP synthase	277.687	-0.427653	1.61937	-0.264086	0.791714	0.9912	FALSE
ENSECAG00000037682			637.973	-0.42666	0.842862	-0.506204	0.612713	0.964898	FALSE
ENSECAG00000020522	PRIMPOL	primase and DNA directed polymerase	274.593	-0.42545	1.68323	-0.252759	0.800455	0.9912	FALSE
ENSECAG00000022843	ZC3H13	zinc finger CCCH-type containing 13	4436.99	-0.425267	0.860304	-0.494322	0.621079	0.964898	FALSE
ENSECAG00000017046	THOC6	THO complex 6	99.4646	-0.424437	1.40129	-0.30289	0.761974	0.987263	FALSE
ENSECAG00000017695	KIAA0586	KIAA0586	1334.98	-0.424082	0.801014	-0.529431	0.596506	0.964898	FALSE
ENSECAG00000023284			111.206	-0.422648	1.10167	-0.383642	0.701244	0.970911	FALSE
ENSECAG00000015817	ATP6V0D1	ATPase H+ transporting V0 subunit d1	37.6459	-0.421215	1.7186	-0.245092	0.806386	0.9912	FALSE
ENSECAG00000023300	TMF1	TATA element modulatory factor 1	740.089	-0.420022	1.192	-0.352366	0.724564	0.979908	FALSE
ENSECAG00000009181	CLINT1	clathrin interactor 1	1469.62	-0.419979	1.03843	-0.404437	0.685891	0.970911	FALSE
ENSECAG00000021598	ZFAND2A	zinc finger AN1-type containing 2A	1097.76	-0.419833	0.995431	-0.42176	0.6732	0.97042	FALSE
ENSECAG00000018098	SON	SON DNA and RNA binding protein	4856.09	-0.417618	0.735847	-0.567534	0.570351	0.964397	FALSE
ENSECAG00000013384	STX3	syntaxin 3	2026.26	-0.417535	0.932816	-0.447606	0.654437	0.97042	FALSE
ENSECAG00000013480	ANO4	anoctamin 4	647.719	-0.414858	1.03867	-0.399414	0.689588	0.970911	FALSE
ENSECAG00000015831	UBE2I	ubiquitin conjugating enzyme E2 I	163.375	-0.41457	1.41658	-0.292655		1	FALSE
ENSECAG00000010511	RNF121	ring finger protein 121	113.398	-0.414434	1.8423	-0.224955	0.822015	0.991883	FALSE
ENSECAG00000013588	WDR20	WD repeat domain 20	2469.74	-0.411506	0.698259	-0.589332	0.555639	0.957851	FALSE
ENSECAG00000019341	SYTL4	synaptotagmin like 4	45.8044	-0.409884	2.10844	-0.194402	0.845861	0.991883	FALSE
ENSECAG00000024693	SUMO1	small ubiquitin like modifier 1	3430.15	-0.406968	0.723099	-0.562811	0.573564	0.964397	FALSE
ENSECAG00000009628	USP7	ubiquitin specific peptidase 7	289.122	-0.406118	1.17261	-0.346338	0.729089	0.979991	FALSE
ENSECAG00000024139	LONRF3	LON peptidase N-terminal domain and ring finger 3	101.399	-0.404891	1.90285	-0.212781		1	FALSE
ENSECAG00000009318	EHBP1	EH domain binding protein 1	778.495	-0.404535	1.47267	-0.274695	0.783551	0.9912	FALSE
ENSECAG00000023646	EVI5	ecotropic viral integration site 5	1082.37	-0.403353	1.21257	-0.332644	0.739403	0.982019	FALSE
ENSECAG00000025104	HNRNPK	heteroous nuclear ribonucleoprotein K	1124.11	-0.402366	0.785457	-0.51227	0.608462	0.964898	FALSE
ENSECAG00000020475	MIER1	MIER1 transcriptional regulator	1176.23	-0.400953	1.14742	-0.349438	0.726761	0.979991	FALSE
ENSECAG00000007482	IRF6	interferon regulatory factor 6	2027.46	-0.400708	0.836393	-0.47909	0.631874	0.964898	FALSE
ENSECAG00000019961	ZP2	zona pellucida glycoprotein 2	479.773	-0.396365	1.28003	-0.309652	0.756825	0.986685	FALSE
ENSECAG00000008396	CALM2	calmodulin 2	24723.5	-0.395154	0.809565	-0.488106	0.625474	0.964898	FALSE
ENSECAG00000023746	NECAB2	N-terminal EF-hand calcium binding protein 2	116.467	-0.394242	1.48917	-0.26474	0.79121	0.9912	FALSE
ENSECAG00000012339			452.385	-0.393413	1.3739	-0.286347	0.774613	0.9912	FALSE
ENSECAG00000011457	CCT8	chaperonin containing TCP1 subunit 8	93.1938	-0.390593	1.85273	-0.21082	0.833028	0.991883	FALSE
ENSECAG00000016874	PRKACA	protein kinase cAMP-activated catalytic subunit alpha	104.267	-0.388823	1.62979	-0.238572	0.811438	0.9912	FALSE
ENSECAG00000014983	HIRIP3	HIRA interacting protein 3	570.244	-0.386594	1.43644	-0.269133	0.787828	0.9912	FALSE
ENSECAG00000030375			80.2274	-0.38463	1.76865	-0.217472	0.827841	0.991883	FALSE
ENSECAG00000017419	MTHFD2	methylenetetrahydrofolate dehydrogenase (NADP+ dependent) 2, methenyltetrahydrofolate cyclohydrolase	868.556	-0.384273	1.13034	-0.339963	0.733884	0.980649	FALSE
ENSECAG00000015297	PRIM1	DNA primase subunit 1	345.219	-0.382679	1.4367	-0.266359	0.789963	0.9912	FALSE
ENSECAG00000000424	SDHAF3	succinate dehydrogenase complex assembly factor 3	95.5741	-0.381608	1.49713	-0.254892	0.798806	0.9912	FALSE
ENSECAG00000018893	TDP1	tyrosyl-DNA phosphodiesterase 1	227.889	-0.381205	1.34615	-0.283182	0.777038	0.9912	FALSE
ENSECAG00000005768	SEPTIN11	septin 11	689.348	-0.379605	1.17002	-0.324444	0.745602	0.984297	FALSE
ENSECAG00000006545	NSFL1C	NSFL1 cofactor	379.958	-0.378976	1.22834	-0.308527	0.757682	0.986685	FALSE
ENSECAG00000000909	CSPP1	centrosome and spindle pole associated protein 1	1817.44	-0.378197	0.93368	-0.405061	0.685433	0.970911	FALSE
ENSECAG00000024789	RANBP3	RAN binding protein 3	128.06	-0.378177	1.70599	-0.221676	0.824566	0.991883	FALSE
ENSECAG00000019640	TOMM20	translocase of outer mitochondrial membrane 20	338.233	-0.377276	1.12143	-0.336422	0.736552	0.981147	FALSE
ENSECAG00000010248	ZMYM1	zinc finger MYM-type containing 1	756.639	-0.376386	1.12843	-0.333549	0.73872	0.981686	FALSE
ENSECAG00000008848	PDIA4	protein disulfide isomerase family A member 4	2463.85	-0.376004	0.842369	-0.446364	0.655334	0.97042	FALSE
ENSECAG00000019889	ATP6AP2	ATPase H+ transporting accessory protein 2	169.693	-0.373265	1.78509	-0.209101		1	FALSE
ENSECAG00000019559	WHRN	whirlin	74.063	-0.369575	1.97229	-0.187383	0.85136	0.991883	FALSE
ENSECAG00000008390	FOXN2	forkhead box N2	579.294	-0.369176	1.48954	-0.247845	0.804254	0.9912	FALSE
ENSECAG00000014948	CIP2A	cellular inhibitor of PP2A	897.463	-0.368162	1.09173	-0.337228	0.735945	0.981147	FALSE
ENSECAG00000028173			1537.38	-0.365749	0.939867	-0.38915	0.697166	0.970911	FALSE
ENSECAG00000004288	CTSV	cathepsin V	97.0259	-0.361767	1.67301	-0.216237	0.828803	0.991883	FALSE
ENSECAG00000010712	AP3S1	adaptor related protein complex 3 subunit sigma 1	19.7506	-0.359638	2.06683	-0.174004	0.861862	0.992542	FALSE
ENSECAG00000010240	NELFA	negative elongation factor complex member A	833.249	-0.35844	0.811841	-0.441514	0.658841	0.97042	FALSE
ENSECAG00000009583	P4HB	prolyl 4-hydroxylase subunit beta	1758.45	-0.357663	0.934321	-0.382805	0.701864	0.970911	FALSE
ENSECAG00000021545	MTSS1	MTSS I-BAR domain containing 1	3487.68	-0.355038	0.832841	-0.426297	0.669891	0.97042	FALSE
ENSECAG00000022286	ARFIP1	ADP ribosylation factor interacting protein 1	237.611	-0.354357	1.40926	-0.251449	0.801467	0.9912	FALSE
ENSECAG00000043283	AGR2	anterior gradient 2, protein disulphide isomerase family member	943.883	-0.354318	1.32663	-0.267081	0.789406	0.9912	FALSE
ENSECAG00000024698	INPP1	inositol polyphosphate-1-phosphatase	389.903	-0.351112	1.26216	-0.278184	0.780871	0.9912	FALSE
ENSECAG00000001042	PHF1	PHD finger protein 1	24.2163	-0.349096	2.02043	-0.172783	0.862822	0.992542	FALSE
ENSECAG00000019051	FYTTD1	forty-two-three domain containing 1	226.802	-0.347182	1.37586	-0.252339	0.800779	0.9912	FALSE
ENSECAG00000014631	TUBAL3	tubulin alpha like 3	297.382	-0.34561	1.31848	-0.262128	0.793223	0.9912	FALSE
ENSECAG00000042384			254.283	-0.344996	1.36377	-0.252972	0.80029	0.9912	FALSE
ENSECAG00000017105	SEC62	SEC62 homolog, preprotein translocation factor	929.084	-0.344876	0.824613	-0.418228	0.67578	0.97042	FALSE
ENSECAG00000021142	NKAP	NFKB activating protein	314.042	-0.343287	1.35377	-0.253579	0.799821	0.9912	FALSE
ENSECAG00000017906	PRC1	protein regulator of cytokinesis 1	6015.76	-0.342824	0.718612	-0.477065	0.633316	0.965594	FALSE
ENSECAG00000017894	CKAP2	cytoskeleton associated protein 2	1835.23	-0.342457	0.788049	-0.434563	0.663879	0.97042	FALSE
ENSECAG00000014338	EGR1	early growth response 1	373.009	-0.340564	1.10651	-0.307781	0.758249	0.986685	FALSE
ENSECAG00000021177	CDK2	cyclin dependent kinase 2	581.719	-0.337515	0.886253	-0.380834	0.703327	0.970911	FALSE
ENSECAG00000023962	SF3A1	splicing factor 3a subunit 1	84.416	-0.337176	1.80605	-0.186693	0.851902	0.991883	FALSE
ENSECAG00000020262	CNOT4	CCR4-NOT transcription complex subunit 4	1457.59	-0.33688	0.925029	-0.364184	0.715721	0.976712	FALSE
ENSECAG00000022024	RBM8A	RNA binding motif protein 8A	74.3936	-0.336327	1.79062	-0.187827	0.851012	0.991883	FALSE
ENSECAG00000024424	TNPO1	transportin 1	349.991	-0.33543	1.08255	-0.30985	0.756675	0.986685	FALSE
ENSECAG00000008168	EXOC5	exocyst complex component 5	731.302	-0.333235	0.90486	-0.368272	0.71267	0.97585	FALSE
ENSECAG00000001379			99.6315	-0.332271	1.16496	-0.28522	0.775475	0.9912	FALSE
ENSECAG00000016935	SENP5	SUMO specific peptidase 5	1289.85	-0.331862	1.01703	-0.326304	0.744194	0.983928	FALSE
ENSECAG00000017024	SEC11C	SEC11 homolog C, signal peptidase complex subunit	277.381	-0.331426	1.67469	-0.197903	0.843121	0.991883	FALSE
ENSECAG00000021367	POPDC3	popeye domain containing 3	297.339	-0.331009	1.35552	-0.244192	0.807082	0.9912	FALSE
ENSECAG00000013245	USO1	USO1 vesicle transport factor	630.729	-0.330611	1.27546	-0.25921	0.795473	0.9912	FALSE
ENSECAG00000042692			740.525	-0.32818	0.836885	-0.392144	0.694952	0.970911	FALSE
ENSECAG00000021595	FAM98A	family with sequence similarity 98 member A	702.544	-0.327556	0.852738	-0.384122	0.700888	0.970911	FALSE
ENSECAG00000019794	OTUD3	OTU deubiquitinase 3	492.003	-0.32551	1.16643	-0.279065	0.780195	0.9912	FALSE
ENSECAG00000033049	SERP1	stress associated endoplasmic reticulum protein 1	433.878	-0.324681	1.14803	-0.282815	0.777319	0.9912	FALSE
ENSECAG00000008963	LARS1	leucyl-tRNA synthetase 1	576.925	-0.324576	1.27044	-0.255484	0.79835	0.9912	FALSE
ENSECAG00000007083	PCYOX1L	prenylcysteine oxidase 1 like	195.245	-0.321466	1.4232	-0.225875	0.821298	0.991883	FALSE
ENSECAG00000010243	GALNT7	polypeptide N-acetylgalactosaminyltransferase 7	240.9	-0.318021	1.4072	-0.225995	0.821205	0.991883	FALSE
ENSECAG00000000252	THAP4	THAP domain containing 4	432.713	-0.317775	1.28815	-0.24669	0.805148	0.9912	FALSE
ENSECAG00000020488	TLN2	talin 2	376.615	-0.314654	1.48268	-0.212219	0.831936	0.991883	FALSE
ENSECAG00000003634	RHNO1	RAD9-HUS1-RAD1 interacting nuclear orphan 1	115.275	-0.309129	1.57727	-0.19599	0.844618	0.991883	FALSE
ENSECAG00000009512	CNBP	CCHC-type zinc finger nucleic acid binding protein	1477.72	-0.308047	0.765996	-0.402152	0.687572	0.970911	FALSE
ENSECAG00000011450	AMZ2	archaelysin family metallopeptidase 2	379.176	-0.307825	1.69771	-0.181318	0.856118	0.992542	FALSE
ENSECAG00000000784	ESRP1	epithelial splicing regulatory protein 1	1734.76	-0.302045	0.884912	-0.341328	0.732857	0.980561	FALSE
ENSECAG00000011539	CHKA	choline kinase alpha	508.059	-0.30101	0.856717	-0.351352	0.725324	0.979908	FALSE
ENSECAG00000012988	UCHL5	ubiquitin C-terminal hydrolase L5	562.859	-0.300352	1.32805	-0.226161	0.821076	0.991883	FALSE
ENSECAG00000015746	SMC1B	structural maintenance of chromosomes 1B	649.659	-0.297558	1.29598	-0.229601	0.818402	0.991883	FALSE
ENSECAG00000013668	GPAA1	glycosylphosphatidylinositol anchor attachment 1	81.3872	-0.2966	1.70008	-0.174463	0.861502	0.992542	FALSE
ENSECAG00000010572	PSMD3	proteasome 26S subunit, non-ATPase 3	79.865	-0.294831	1.42761	-0.20652	0.836385	0.991883	FALSE
ENSECAG00000023884	NLRP13	NLR family pyrin domain containing 13	827.14	-0.293925	0.82546	-0.356074	0.721785	0.979589	FALSE
ENSECAG00000022483	PTP4A1	protein tyrosine phosphatase 4A1	508.359	-0.292687	1.11744	-0.261926	0.793378	0.9912	FALSE
ENSECAG00000023808	ATAD2	ATPase family AAA domain containing 2	307.918	-0.2876	1.3717	-0.209666	0.833928	0.991883	FALSE
ENSECAG00000011612	SRRM2	serine/arginine repetitive matrix 2	1816.98	-0.286751	1.02945	-0.278546	0.780593	0.9912	FALSE
ENSECAG00000020859	AGAP3	ArfGAP with GTPase domain, ankyrin repeat and PH domain 3	310.301	-0.286387	1.19157	-0.240345	0.810062	0.9912	FALSE
ENSECAG00000024473	MCM10	minichromosome maintenance 10 replication initiation factor	1369.4	-0.285293	0.792387	-0.360042	0.718816	0.978024	FALSE
ENSECAG00000001014	ABCC3	ATP binding cassette subfamily C member 3	71.0145	-0.283691	1.84611	-0.15367	0.87787	0.994183	FALSE
ENSECAG00000037565			422.807	-0.283348	1.01617	-0.27884	0.780368	0.9912	FALSE
ENSECAG00000024215	GINS2	GINS complex subunit 2	133.637	-0.282154	1.47896	-0.190779	0.848699	0.991883	FALSE
ENSECAG00000003925			381.948	-0.282014	1.14199	-0.24695	0.804947	0.9912	FALSE
ENSECAG00000001911	TAX1BP1	Tax1 binding protein 1	3894.08	-0.279941	0.917339	-0.305166	0.76024	0.986964	FALSE
ENSECAG00000018495	SSB	small RNA binding exonuclease protection factor La	5273.19	-0.276985	0.773971	-0.357875	0.720437	0.979546	FALSE
ENSECAG00000017915	TRIM36	tripartite motif containing 36	363.442	-0.275515	1.15773	-0.237979	0.811897	0.9912	FALSE
ENSECAG00000038860	GTF2H5	general transcription factor IIH subunit 5	127.269	-0.275418	1.44468	-0.190643	0.848805	0.991883	FALSE
ENSECAG00000020445	RNF146	ring finger protein 146	860.357	-0.274951	0.861344	-0.319212	0.749566	0.984408	FALSE
ENSECAG00000009163	NUF2	NUF2 component of NDC80 kinetochore complex	1166.35	-0.274086	1.33445	-0.205393	0.837265	0.991883	FALSE
ENSECAG00000005577	GPR39	G protein-coupled receptor 39	113.394	-0.27293	1.44712	-0.188602	0.850405	0.991883	FALSE
ENSECAG00000008542			616.012	-0.268877	0.995758	-0.270022	0.787143	0.9912	FALSE
ENSECAG00000000053	AIMP2	aminoacyl tRNA synthetase complex interacting multifunctional protein 2	1318.36	-0.268616	1.07789	-0.249204	0.803203	0.9912	FALSE
ENSECAG00000023991	CTNNA1	catenin alpha 1	254.645	-0.266982	1.27145	-0.209982	0.833682	0.991883	FALSE
ENSECAG00000015122	ACAP2	ArfGAP with coiled-coil, ankyrin repeat and PH domains 2	380.344	-0.265444	1.67412	-0.158557	0.874018	0.994154	FALSE
ENSECAG00000020838	USP47	ubiquitin specific peptidase 47	1995.42	-0.264201	0.86727	-0.304635	0.760644	0.986964	FALSE
ENSECAG00000006875	IP6K2	inositol hexakisphosphate kinase 2	102.139	-0.262737	1.84308	-0.142553	0.886643	0.995641	FALSE
ENSECAG00000020188	CNN3	calponin 3	507.893	-0.262576	1.16744	-0.224915	0.822046	0.991883	FALSE
ENSECAG00000016673			476.722	-0.26241	0.995358	-0.263634	0.792062	0.9912	FALSE
ENSECAG00000000529	MAP1S	microtubule associated protein 1S	258.162	-0.261525	1.45931	-0.179211	0.857772	0.992542	FALSE
ENSECAG00000021033	WBP4	WW domain binding protein 4	850.286	-0.261002	1.1574	-0.225508	0.821584	0.991883	FALSE
ENSECAG00000022532	GSE1	Gse1 coiled-coil protein	2481.25	-0.260691	0.813023	-0.320644	0.74848	0.984297	FALSE
ENSECAG00000033043			400.184	-0.25956	0.990444	-0.262064	0.793272	0.9912	FALSE
ENSECAG00000023318	GNS	glucosamine (N-acetyl)-6-sulfatase	225.484	-0.259076	1.60851	-0.161065	0.872042	0.994154	FALSE
ENSECAG00000011621	NAT10	N-acetyltransferase 10	192.927	-0.257611	1.64032	-0.157049	0.875206	0.994154	FALSE
ENSECAG00000020867	ACTR3	actin related protein 3	223.565	-0.256699	1.6032	-0.160117	0.872789	0.994154	FALSE
ENSECAG00000010199	EMC2	ER membrane protein complex subunit 2	152.857	-0.256067	1.5722	-0.162871	0.87062	0.994154	FALSE
ENSECAG00000021986	HARS1	histidyl-tRNA synthetase 1	718.879	-0.256028	1.30824	-0.195704	0.844842	0.991883	FALSE
ENSECAG00000012858	RASL11A	RAS like family 11 member A	4020.41	-0.255685	0.892603	-0.286449	0.774534	0.9912	FALSE
ENSECAG00000010404	HELZ	helicase with zinc finger	570.886	-0.25527	1.25264	-0.203786	0.838521	0.991883	FALSE
ENSECAG00000006358	ETAA1	ETAA1 activator of ATR kinase	441.239	-0.252845	1.36839	-0.184775	0.853405	0.991883	FALSE
ENSECAG00000023074	SLC25A14	solute carrier family 25 member 14	456.261	-0.252607	1.3473	-0.187491	0.851276	0.991883	FALSE
ENSECAG00000021957	TRIM24	tripartite motif containing 24	1088.63	-0.251708	1.15574	-0.217789	0.827593	0.991883	FALSE
ENSECAG00000011456	ARPC2	actin related protein 2/3 complex subunit 2	1192.61	-0.25143	0.909391	-0.276482	0.782178	0.9912	FALSE
ENSECAG00000016495	NUSAP1	nucleolar and spindle associated protein 1	2579.6	-0.247599	0.820067	-0.301926	0.762709	0.987263	FALSE
ENSECAG00000012235	BAZ2B	bromodomain adjacent to zinc finger domain 2B	416.591	-0.247097	1.55717	-0.158683	0.873919	0.994154	FALSE
ENSECAG00000025086	DNMT3A	DNA methyltransferase 3 alpha	2065.07	-0.246146	0.748471	-0.328866	0.742257	0.983881	FALSE
ENSECAG00000010873	CNIH4	cornichon family AMPA receptor auxiliary protein 4	887.006	-0.245234	1.37309	-0.1786	0.858252	0.992542	FALSE
ENSECAG00000018370	NCAPD3	non-SMC condensin II complex subunit D3	804.339	-0.245198	0.951145	-0.257792	0.796567	0.9912	FALSE
ENSECAG00000022717	PDIA6	protein disulfide isomerase family A member 6	858.823	-0.244981	1.26354	-0.193884	0.846267	0.991883	FALSE
ENSECAG00000015774	OOSP2	oocyte secreted protein 2	183.325	-0.244708	1.52209	-0.160772	0.872273	0.994154	FALSE
ENSECAG00000010553	NGF	nerve growth factor	274.384	-0.244642	1.3245	-0.184705	0.853461	0.991883	FALSE
ENSECAG00000010238	CECR2	CECR2 histone acetyl-lysine reader	918.965	-0.24428	1.38708	-0.176111	0.860207	0.992542	FALSE
ENSECAG00000006665	GPM6B	glycoprotein M6B	75.0437	-0.243103	1.56777	-0.155063	0.876771	0.994154	FALSE
ENSECAG00000018203	CIB1	calcium and integrin binding 1	321.247	-0.242215	1.02331	-0.236698	0.812891	0.9912	FALSE
ENSECAG00000012317	COX6B1	cytochrome c oxidase subunit 6B1	142.042	-0.238205	1.52758	-0.155936	0.876083	0.994154	FALSE
ENSECAG00000014459	ARL13B	ADP ribosylation factor like GTPase 13B	257.327	-0.237391	1.48865	-0.159468	0.8733	0.994154	FALSE
ENSECAG00000021065	RPL5	ribosomal protein L5	634.534	-0.236424	1.28012	-0.184688	0.853473	0.991883	FALSE
ENSECAG00000023776	TTK	TTK protein kinase	831.247	-0.235762	1.1115	-0.212111	0.83202	0.991883	FALSE
ENSECAG00000008428	CEP83	centrosomal protein 83	678.529	-0.232548	1.50893	-0.154114	0.877519	0.994154	FALSE
ENSECAG00000012383	ATE1	arginyltransferase 1	1148.28	-0.232075	0.91472	-0.253711	0.799719	0.9912	FALSE
ENSECAG00000006289	NCOR1	nuclear receptor corepressor 1	3894.14	-0.231577	0.722306	-0.320608	0.748507	0.984297	FALSE
ENSECAG00000028544	PSMD4	proteasome 26S subunit ubiquitin receptor, non-ATPase 4	43.0648	-0.230601	2.05265	-0.112343	0.910551	0.995641	FALSE
ENSECAG00000016044	FAXC	failed axon connections homolog, metaxin like GST domain containing	1349.75	-0.22859	0.806272	-0.283514	0.776783	0.9912	FALSE
ENSECAG00000002676	SMARCA5	SWI/SNF related, matrix associated, actin dependent regulator of chromatin, subfamily a, member 5	9183.92	-0.228287	0.698586	-0.326784	0.743832	0.983928	FALSE
ENSECAG00000010315	MSH2	mutS homolog 2	178.506	-0.224952	1.52866	-0.147156	0.883009	0.995641	FALSE
ENSECAG00000007824	SNRPD2	small nuclear ribonucleoprotein D2 polypeptide	1674.63	-0.22456	0.758105	-0.296212	0.767068	0.989556	FALSE
ENSECAG00000015900	POLR3GL	RNA polymerase III subunit GL	781.883	-0.224332	1.08978	-0.205851	0.836907	0.991883	FALSE
ENSECAG00000012800	NUP88	nucleoporin 88	1392.81	-0.223587	0.972203	-0.22998	0.818107	0.991883	FALSE
ENSECAG00000007078	AMN1	antagonist of mitotic exit network 1 homolog	162.921	-0.22352	1.53308	-0.145798	0.884081	0.995641	FALSE
ENSECAG00000022765	ZC3H8	zinc finger CCCH-type containing 8	1013.04	-0.223301	0.996053	-0.224186	0.822613	0.991883	FALSE
ENSECAG00000010410	BOD1L1	biorientation of chromosomes in cell division 1 like 1	3268.17	-0.222723	0.923842	-0.241083	0.80949	0.9912	FALSE
ENSECAG00000012899	ESCO2	establishment of sister chromatid cohesion N-acetyltransferase 2	2691.66	-0.22245	0.744962	-0.298605	0.765241	0.988653	FALSE
ENSECAG00000012925	NAA30	N-alpha-acetyltransferase 30, NatC catalytic subunit	79.0565	-0.221897	1.82587	-0.121529		1	FALSE
ENSECAG00000000608	CAPRIN2	caprin family member 2	1141.73	-0.220802	1.13555	-0.194446	0.845827	0.991883	FALSE
ENSECAG00000005949	MSH6	mutS homolog 6	722.218	-0.21833	1.21562	-0.179604	0.857463	0.992542	FALSE
ENSECAG00000022480	SYVN1	synoviolin 1	595.988	-0.214647	1.08394	-0.198025	0.843025	0.991883	FALSE
ENSECAG00000023413	BBX	BBX high mobility group box domain containing	2895.94	-0.213505	0.792044	-0.269562	0.787497	0.9912	FALSE
ENSECAG00000021657	SF3B1	splicing factor 3b subunit 1	1291.54	-0.21347	0.792552	-0.269345	0.787664	0.9912	FALSE
ENSECAG00000033970	TRMT112	tRNA methyltransferase activator subunit 11-2	391.378	-0.211909	1.43898	-0.147263	0.882924	0.995641	FALSE
ENSECAG00000019350	FAM76A	family with sequence similarity 76 member A	358.705	-0.211796	1.50429	-0.140795	0.888032	0.995641	FALSE
ENSECAG00000036105			296.397	-0.211664	1.22566	-0.172693	0.862893	0.992542	FALSE
ENSECAG00000019782	PNISR	PNN interacting serine and arginine rich protein	559.871	-0.211564	1.02571	-0.20626	0.836588	0.991883	FALSE
ENSECAG00000019671	ANXA11	annexin A11	293.733	-0.211261	1.15425	-0.18303	0.854775	0.992412	FALSE
ENSECAG00000009131	OMA1	OMA1 zinc metallopeptidase	670.108	-0.21038	1.13223	-0.185811	0.852593	0.991883	FALSE
ENSECAG00000030120	CCDC121	coiled-coil domain containing 121	261.433	-0.210198	1.56202	-0.134568	0.892954	0.995641	FALSE
ENSECAG00000009780	UQCRB	ubiquinol-cytochrome c reductase binding protein	33.2208	-0.210036	2.11123	-0.0994849	0.920753	0.995641	FALSE
ENSECAG00000016959	B3GNT2	UDP-GlcNAc:betaGal beta-1,3-N-acetylglucosaminyltransferase 2	627.221	-0.208178	1.01838	-0.204421	0.838024	0.991883	FALSE
ENSECAG00000035318			283.651	-0.207698	1.00076	-0.207539	0.835589	0.991883	FALSE
ENSECAG00000016773	NABP1	nucleic acid binding protein 1	368.083	-0.204496	1.20202	-0.170126	0.864911	0.993852	FALSE
ENSECAG00000009648	CLIP1	CAP-Gly domain containing linker protein 1	2004.06	-0.204454	0.855423	-0.239009	0.811098	0.9912	FALSE
ENSECAG00000020792	CAMTA1	calmodulin binding transcription activator 1	495.617	-0.204083	1.11601	-0.182869	0.854901	0.992412	FALSE
ENSECAG00000015530	KPNA3	karyopherin subunit alpha 3	206.732	-0.203666	1.22075	-0.166838	0.867498	0.994154	FALSE
ENSECAG00000020504	THADA	THADA armadillo repeat containing	382.65	-0.202025	1.56826	-0.128822	0.897499	0.995641	FALSE
ENSECAG00000016705	UGP2	UDP-glucose pyrophosphorylase 2	808.361	-0.201773	1.09041	-0.185042	0.853196	0.991883	FALSE
ENSECAG00000012559	RAB7A	RAB7A, member RAS onco family	1146.02	-0.201589	1.07115	-0.188198	0.850721	0.991883	FALSE
ENSECAG00000016651	NSMCE4A	NSE4 homolog A, SMC5-SMC6 complex component	867.214	-0.200532	1.04327	-0.192214	0.847575	0.991883	FALSE
ENSECAG00000023644	PPAT	phosphoribosyl pyrophosphate amidotransferase	1043.59	-0.199112	1.06971	-0.186137	0.852338	0.991883	FALSE
ENSECAG00000020220	PAK5	p21 (RAC1) activated kinase 5	514.839	-0.197461	0.951035	-0.207627	0.83552	0.991883	FALSE
ENSECAG00000015172	SSH2	slingshot protein phosphatase 2	1296.1	-0.194116	0.99214	-0.195654	0.844881	0.991883	FALSE
ENSECAG00000011858	UBE2V1	ubiquitin conjugating enzyme E2 V1	31.3097	-0.193556	1.99115	-0.0972081	0.922561	0.995641	FALSE
ENSECAG00000020079	CDK2AP2	cyclin dependent kinase 2 associated protein 2	115.565	-0.19348	1.80911	-0.106947	0.914831	0.995641	FALSE
ENSECAG00000014475	STK39	serine/threonine kinase 39	207.068	-0.192876	1.41877	-0.135946	0.891864	0.995641	FALSE
ENSECAG00000007640	KDM6A	lysine demethylase 6A	906.029	-0.189788	1.13005	-0.167946	0.866626	0.994036	FALSE
ENSECAG00000005084			263.363	-0.187471	1.58472	-0.118299	0.905831	0.995641	FALSE
ENSECAG00000024685	NPM2	nucleophosmin/nucleoplasmin 2	437.357	-0.185009	0.913902	-0.202438	0.839574	0.991883	FALSE
ENSECAG00000016261	UACA	uveal autoantigen with coiled-coil domains and ankyrin repeats	2966.67	-0.184064	0.817846	-0.22506	0.821933	0.991883	FALSE
ENSECAG00000005616	RPA2	replication protein A2	545.859	-0.184005	1.36124	-0.135174	0.892474	0.995641	FALSE
ENSECAG00000035324	HAS3	hyaluronan synthase 3	1039.57	-0.180787	0.996498	-0.181422	0.856036	0.992542	FALSE
ENSECAG00000002521	CNP	2',3'-cyclic nucleotide 3' phosphodiesterase	110.725	-0.180426	1.52157	-0.118579	0.905609	0.995641	FALSE
ENSECAG00000006901	TCEANC2	transcription elongation factor A N-terminal and central domain containing 2	170.821	-0.180345	1.46739	-0.122902	0.902185	0.995641	FALSE
ENSECAG00000010810	DDX21	DExD-box helicase 21	231.151	-0.178916	1.19762	-0.149393	0.881244	0.99536	FALSE
ENSECAG00000011778	C7H11orf58	chromosome 7 C11orf58 homolog	2948.61	-0.178554	0.844863	-0.21134	0.832622	0.991883	FALSE
ENSECAG00000010855	PTPRA	protein tyrosine phosphatase receptor type A	722.703	-0.176484	1.31535	-0.134173	0.893266	0.995641	FALSE
ENSECAG00000026930	SEC61B	SEC61 translocon subunit beta	904.696	-0.174883	0.813436	-0.214993	0.829773	0.991883	FALSE
ENSECAG00000027736			139.537	-0.174554	1.65302	-0.105597	0.915902	0.995641	FALSE
ENSECAG00000037716	RRP15	ribosomal RNA processing 15 homolog	139.365	-0.172655	1.65317	-0.104439	0.916821	0.995641	FALSE
ENSECAG00000007993	PIAS1	protein inhibitor of activated STAT 1	3261.54	-0.170502	0.778712	-0.218954	0.826686	0.991883	FALSE
ENSECAG00000016856	SLC7A2	solute carrier family 7 member 2	218.606	-0.168954	1.6223	-0.104145	0.917055	0.995641	FALSE
ENSECAG00000010697	ZP4	zona pellucida glycoprotein 4	1079.65	-0.168634	0.974338	-0.173076	0.862592	0.992542	FALSE
ENSECAG00000021030	IFT74	intraflagellar transport 74	856.933	-0.168293	1.0026	-0.167857	0.866696	0.994036	FALSE
ENSECAG00000024501	FAM193A	family with sequence similarity 193 member A	1130.39	-0.166431	1.09913	-0.151421	0.879644	0.995172	FALSE
ENSECAG00000013231	CLPTM1L	CLPTM1 like	97.5687	-0.165306	1.46584	-0.112772	0.910211	0.995641	FALSE
ENSECAG00000028196	ATP5MK	ATP synthase membrane subunit k	122.314	-0.165282	1.43547	-0.115141	0.908333	0.995641	FALSE
ENSECAG00000018412	LMBRD1	LMBR1 domain containing 1	104.258	-0.162814	1.69844	-0.0958607	0.923631	0.995641	FALSE
ENSECAG00000002091	QTRT2	queuine tRNA-ribosyltransferase accessory subunit 2	301.231	-0.159544	1.43874	-0.110891	0.911703	0.995641	FALSE
ENSECAG00000039960	INSL6	insulin like 6	109.507	-0.158382	1.6259	-0.0974119	0.922399	0.995641	FALSE
ENSECAG00000007125	ANKRD17	ankyrin repeat domain 17	1704.13	-0.155499	0.819352	-0.189782	0.84948	0.991883	FALSE
ENSECAG00000022641	SDF2L1	stromal cell derived factor 2 like 1	1005.97	-0.155363	1.15004	-0.135094	0.892537	0.995641	FALSE
ENSECAG00000029550			675.956	-0.153154	0.97915	-0.156416	0.875705	0.994154	FALSE
ENSECAG00000021289	CCNE1	cyclin E1	591.726	-0.152832	1.08159	-0.141303	0.88763	0.995641	FALSE
ENSECAG00000011177	TESC	tescalcin	561.578	-0.152794	1.08854	-0.140366	0.888371	0.995641	FALSE
ENSECAG00000039007			138.522	-0.152575	1.44094	-0.105885	0.915673	0.995641	FALSE
ENSECAG00000023715			430.88	-0.151987	1.17791	-0.129031	0.897333	0.995641	FALSE
ENSECAG00000008450	ATP2B1	ATPase plasma membrane Ca2+ transporting 1	1250.68	-0.150624	0.861591	-0.174821	0.86122	0.992542	FALSE
ENSECAG00000020602	NLRP4	NLR family pyrin domain containing 4	93.943	-0.150052	1.53446	-0.0977882	0.922101	0.995641	FALSE
ENSECAG00000021276	BRD3	bromodomain containing 3	1315.85	-0.14934	0.861909	-0.173267	0.862442	0.992542	FALSE
ENSECAG00000008958	SOD1	superoxide dismutase 1	1831.02	-0.148064	0.900898	-0.164352	0.869454	0.994154	FALSE
ENSECAG00000026981	SRRM1	serine and arginine repetitive matrix 1	5478.43	-0.147347	0.748471	-0.196864	0.843934	0.991883	FALSE
ENSECAG00000012516	EIF1	eukaryotic translation initiation factor 1	1525.28	-0.147306	1.02363	-0.143906	0.885575	0.995641	FALSE
ENSECAG00000012915	KCTD13	potassium channel tetramerization domain containing 13	140.389	-0.146727	1.16274	-0.126191	0.899581	0.995641	FALSE
ENSECAG00000019475	YTHDF1	YTH N6-methyladenosine RNA binding protein 1	98.0097	-0.143382	1.45595	-0.0984796	0.921551	0.995641	FALSE
ENSECAG00000024842	SH3BP5	SH3 domain binding protein 5	858.655	-0.14198	0.908922	-0.156207	0.87587	0.994154	FALSE
ENSECAG00000020144	UBXN2A	UBX domain protein 2A	1288.85	-0.141589	0.984068	-0.143882	0.885594	0.995641	FALSE
ENSECAG00000013618	GTSF1	gametocyte specific factor 1	356.002	-0.141413	1.46064	-0.0968154	0.922873	0.995641	FALSE
ENSECAG00000015542	OSBPL8	oxysterol binding protein like 8	431.27	-0.140893	1.8715	-0.0752832	0.939989	0.995641	FALSE
ENSECAG00000000084	ACBD3	acyl-CoA binding domain containing 3	366.885	-0.140715	1.40264	-0.100321	0.92009	0.995641	FALSE
ENSECAG00000015938			1496.51	-0.139753	1.08802	-0.128447	0.897796	0.995641	FALSE
ENSECAG00000014979	AFAP1L2	actin filament associated protein 1 like 2	201.065	-0.138407	1.45966	-0.0948217	0.924456	0.995641	FALSE
ENSECAG00000015132	SMAD2	SMAD family member 2	636.667	-0.137958	1.08734	-0.126877	0.899038	0.995641	FALSE
ENSECAG00000013756	RBIS	ribosomal biosis factor	311.701	-0.132835	1.30845	-0.101521	0.919137	0.995641	FALSE
ENSECAG00000017447	SMS	spermine synthase	455.165	-0.131946	1.17389	-0.1124	0.910506	0.995641	FALSE
ENSECAG00000028386			30.7326	-0.128681	2.07642	-0.0619726		1	FALSE
ENSECAG00000040301	TLCD3A	TLC domain containing 3A	59.8872	-0.126624	2.06897	-0.0612014		1	FALSE
ENSECAG00000016088	CCDC43	coiled-coil domain containing 43	1260.5	-0.121914	0.789231	-0.154471	0.877238	0.994154	FALSE
ENSECAG00000016013	SZRD1	SUZ RNA binding domain containing 1	33.2439	-0.121534	2.01167	-0.0604144		1	FALSE
ENSECAG00000009335	DNAJC3	DnaJ heat shock protein family (Hsp40) member C3	1921.96	-0.121083	1.12081	-0.108032	0.913971	0.995641	FALSE
ENSECAG00000034840	TNFSF12	TNF superfamily member 12	434.69	-0.120266	1.32532	-0.0907449	0.927695	0.995641	FALSE
ENSECAG00000004253	FBXO34	F-box protein 34	1577.26	-0.118389	0.766816	-0.15439	0.877302	0.994154	FALSE
ENSECAG00000011218	HAT1	histone acetyltransferase 1	2378.9	-0.115183	1.03119	-0.111698	0.911063	0.995641	FALSE
ENSECAG00000009160	SH3GLB1	SH3 domain containing GRB2 like, endophilin B1	2292.17	-0.112368	0.935988	-0.120053	0.904441	0.995641	FALSE
ENSECAG00000026842	ACER3	alkaline ceramidase 3	62.5061	-0.110894	1.84468	-0.0601153	0.952064	0.995641	FALSE
ENSECAG00000014813	CCNB2	cyclin B2	293.111	-0.109007	1.12819	-0.0966218	0.923027	0.995641	FALSE
ENSECAG00000018454	RBBP8	RB binding protein 8, endonuclease	564.469	-0.1085	1.3042	-0.0831925	0.933698	0.995641	FALSE
ENSECAG00000017534	HPRT1	hypoxanthine phosphoribosyltransferase 1	1047.39	-0.107952	0.993659	-0.108641	0.913487	0.995641	FALSE
ENSECAG00000012597	EIF5	eukaryotic translation initiation factor 5	1640.33	-0.107516	0.808475	-0.132986	0.894204	0.995641	FALSE
ENSECAG00000040547			4281.77	-0.106755	0.806055	-0.132441	0.894635	0.995641	FALSE
ENSECAG00000024638	MED23	mediator complex subunit 23	95.7334	-0.106355	1.53997	-0.069063	0.944939	0.995641	FALSE
ENSECAG00000000269	CDC37L1	cell division cycle 37 like 1, HSP90 cochaperone	656.632	-0.106286	1.07846	-0.0985536	0.921493	0.995641	FALSE
ENSECAG00000000020	THAP1	THAP domain containing 1	1657.47	-0.105604	0.943972	-0.111872	0.910925	0.995641	FALSE
ENSECAG00000019817	SNRPF	small nuclear ribonucleoprotein polypeptide F	1651.05	-0.104723	0.957928	-0.109322	0.912947	0.995641	FALSE
ENSECAG00000014373	SNRPD1	small nuclear ribonucleoprotein D1 polypeptide	493.315	-0.104696	1.11023	-0.0943014	0.92487	0.995641	FALSE
ENSECAG00000026844	UTP23	UTP23 small subunit processome component	3591.64	-0.104396	0.765188	-0.136432	0.89148	0.995641	FALSE
ENSECAG00000008911	PRDM2	PR/SET domain 2	1440.66	-0.101405	1.06052	-0.0956186	0.923824	0.995641	FALSE
ENSECAG00000024333	TAF2	TATA-box binding protein associated factor 2	196.3	-0.10014	1.69695	-0.0590118	0.952943	0.995641	FALSE
ENSECAG00000019974	CFAP298	cilia and flagella associated protein 298	1466.15	-0.0995484	0.903654	-0.110162	0.912281	0.995641	FALSE
ENSECAG00000020755	CCT2	chaperonin containing TCP1 subunit 2	2073.15	-0.0992864	0.945839	-0.104972	0.916398	0.995641	FALSE
ENSECAG00000008096	FAM111B	FAM111 trypsin like peptidase B	219.316	-0.0969683	1.32979	-0.07292	0.94187	0.995641	FALSE
ENSECAG00000012028	ZNF354B	zinc finger protein 354B	128.224	-0.0952564	1.40116	-0.0679839	0.945798	0.995641	FALSE
ENSECAG00000011630	FBXO5	F-box protein 5	979.074	-0.0947694	1.34337	-0.070546	0.943759	0.995641	FALSE
ENSECAG00000018966	FBXO48	F-box protein 48	220.145	-0.0937005	1.42604	-0.0657069	0.947611	0.995641	FALSE
ENSECAG00000000018	KANSL1L	KAT8 regulatory NSL complex subunit 1 like	235.593	-0.0928279	1.67708	-0.0553511	0.955859	0.995666	FALSE
ENSECAG00000013295	NUFIP1	nuclear FMR1 interacting protein 1	1905.32	-0.0923118	0.843713	-0.109411	0.912876	0.995641	FALSE
ENSECAG00000011753	SESTD1	SEC14 and spectrin domain containing 1	379.191	-0.0922762	1.27859	-0.0721701	0.942467	0.995641	FALSE
ENSECAG00000020230	PSMD9	proteasome 26S subunit, non-ATPase 9	1808.85	-0.0922242	0.771826	-0.119488	0.904888	0.995641	FALSE
ENSECAG00000021452	BUB1B	BUB1 mitotic checkpoint serine/threonine kinase B	469.468	-0.0903693	1.12958	-0.0800025	0.936235	0.995641	FALSE
ENSECAG00000014594	EPAS1	endothelial PAS domain protein 1	417.097	-0.0883772	1.18252	-0.0747362	0.940425	0.995641	FALSE
ENSECAG00000016699	MSL3	MSL complex subunit 3	481.934	-0.0867735	1.20652	-0.0719202	0.942665	0.995641	FALSE
ENSECAG00000036462	ELOB	elongin B	47.8405	-0.0855052	2.01508	-0.0424325		1	FALSE
ENSECAG00000011196	PADI4	peptidyl arginine deiminase 4	290.069	-0.0851307	1.36833	-0.0622152	0.950391	0.995641	FALSE
ENSECAG00000016917	TES	testin LIM domain protein	376.437	-0.0846411	1.41548	-0.0597966	0.952318	0.995641	FALSE
ENSECAG00000011152	STIL	STIL centriolar assembly protein	858.161	-0.0845896	1.11921	-0.0755798	0.939753	0.995641	FALSE
ENSECAG00000007532			1255.94	-0.0837018	1.01383	-0.0825598	0.934202	0.995641	FALSE
ENSECAG00000035135			6793.91	-0.0833875	0.757661	-0.110059	0.912362	0.995641	FALSE
ENSECAG00000017560	USP33	ubiquitin specific peptidase 33	863.991	-0.0821599	1.08161	-0.0759606	0.93945	0.995641	FALSE
ENSECAG00000020408	PSMD7	proteasome 26S subunit, non-ATPase 7	1057.02	-0.081881	0.862651	-0.0949179	0.92438	0.995641	FALSE
ENSECAG00000025036	RSL1D1	ribosomal L1 domain containing 1	1610.67	-0.0817779	1.06202	-0.0770022	0.938622	0.995641	FALSE
ENSECAG00000014615	STX2	syntaxin 2	971.222	-0.0815079	1.20521	-0.0676298	0.94608	0.995641	FALSE
ENSECAG00000007702	NELFB	negative elongation factor complex member B	366.457	-0.0813932	1.4539	-0.0559829	0.955355	0.995666	FALSE
ENSECAG00000001892	PRPF38B	pre-mRNA processing factor 38B	720.539	-0.0808948	1.05484	-0.0766891	0.938871	0.995641	FALSE
ENSECAG00000011938	MANF	mesencephalic astrocyte derived neurotrophic factor	375.842	-0.0796319	1.34608	-0.0591583	0.952826	0.995641	FALSE
ENSECAG00000021689	MEST	mesoderm specific transcript	111.776	-0.0777107	1.31404	-0.0591386	0.952842	0.995641	FALSE
ENSECAG00000020710	DRC1	dynein regulatory complex subunit 1	365.588	-0.0774049	1.11472	-0.0694391	0.94464	0.995641	FALSE
ENSECAG00000021000	PAX6	paired box 6	1156.46	-0.076276	0.818891	-0.0931455	0.925788	0.995641	FALSE
ENSECAG00000006280	LPIN2	lipin 2	471.335	-0.075809	1.26218	-0.060062	0.952106	0.995641	FALSE
ENSECAG00000023505	HECTD1	HECT domain E3 ubiquitin protein ligase 1	729.579	-0.0747122	1.11978	-0.0667205	0.946804	0.995641	FALSE
ENSECAG00000019043	SSC5D	scavenger receptor cysteine rich family member with 5 domains	361.441	-0.0741024	1.40724	-0.052658	0.958004	0.995666	FALSE
ENSECAG00000022120	EWSR1	EWS RNA binding protein 1	244.696	-0.0727623	1.23866	-0.0587429	0.953157	0.995641	FALSE
ENSECAG00000010047	BUB3	BUB3 mitotic checkpoint protein	1332.79	-0.0717421	0.805604	-0.0890537	0.929039	0.995641	FALSE
ENSECAG00000036766			3164.59	-0.0707074	1.01635	-0.0695703	0.944536	0.995641	FALSE
ENSECAG00000013348	LIMCH1	LIM and calponin homology domains 1	7585.65	-0.0702291	0.770952	-0.0910939	0.927418	0.995641	FALSE
ENSECAG00000005331	ISOC1	isochorismatase domain containing 1	658.658	-0.0672344	1.26486	-0.0531557	0.957608	0.995666	FALSE
ENSECAG00000018813	GUCY2C	guanylate cyclase 2C	252.676	-0.0666165	1.09135	-0.0610407	0.951327	0.995641	FALSE
ENSECAG00000008676	HNRNPA1	heteroous nuclear ribonucleoprotein A1	12497.6	-0.0656884	0.76467	-0.0859042	0.931543	0.995641	FALSE
ENSECAG00000012564	BTG4	BTG anti-proliferation factor 4	7339.54	-0.0638386	0.730556	-0.0873835	0.930367	0.995641	FALSE
ENSECAG00000023917	ADCK2	aarF domain containing kinase 2	866.863	-0.0637916	0.954014	-0.0668665	0.946688	0.995641	FALSE
ENSECAG00000035105			110.637	-0.0630617	1.68172	-0.0374983	0.970088	0.997178	FALSE
ENSECAG00000013285	ATR	ATR serine/threonine kinase	1301.91	-0.0594162	1.24841	-0.0475936	0.96204	0.997138	FALSE
ENSECAG00000002889	BAZ1B	bromodomain adjacent to zinc finger domain 1B	1539.17	-0.0566596	0.938663	-0.060362	0.951867	0.995641	FALSE
ENSECAG00000011147	EIF4G3	eukaryotic translation initiation factor 4 gamma 3	4181.09	-0.0547182	0.755884	-0.0723896	0.942292	0.995641	FALSE
ENSECAG00000010787	PPP2R5E	protein phosphatase 2 regulatory subunit B'epsilon	424.596	-0.0539197	1.16195	-0.0464044	0.962988	0.997138	FALSE
ENSECAG00000006011	RALGPS2	Ral GEF with PH domain and SH3 binding motif 2	303.377	-0.0536337	1.50696	-0.0355907	0.971609	0.997178	FALSE
ENSECAG00000014168	PSMA7	proteasome 20S subunit alpha 7	29851.3	-0.0530984	0.714087	-0.0743585	0.940725	0.995641	FALSE
ENSECAG00000034126			107.671	-0.0527154	1.33472	-0.0394955	0.968495	0.997138	FALSE
ENSECAG00000026873	SRSF5	serine and arginine rich splicing factor 5	264.289	-0.0526984	1.28985	-0.0408562	0.967411	0.997138	FALSE
ENSECAG00000017496	TM7SF3	transmembrane 7 superfamily member 3	325.011	-0.0526134	0.909475	-0.0578503	0.953868	0.995641	FALSE
ENSECAG00000023355	GTSE1	G2 and S-phase expressed 1	1125.71	-0.051126	0.84081	-0.0608057	0.951514	0.995641	FALSE
ENSECAG00000012818	TUBB3	tubulin beta 3 class III	1131.02	-0.0478208	1.13354	-0.042187	0.96635	0.997138	FALSE
ENSECAG00000039147	WDR82	WD repeat domain 82	168.085	-0.0475258	1.71764	-0.0276693	0.977926	0.997305	FALSE
ENSECAG00000015497	NAA16	N-alpha-acetyltransferase 16, NatA auxiliary subunit	520.472	-0.0456317	1.4462	-0.0315528	0.974829	0.997305	FALSE
ENSECAG00000007657	SFSWAP	splicing factor SWAP	768.72	-0.0450319	1.26278	-0.035661	0.971553	0.997178	FALSE
ENSECAG00000016586	NUCB2	nucleobindin 2	492.358	-0.0448957	1.64513	-0.02729	0.978228	0.997305	FALSE
ENSECAG00000008137	VANGL1	VANGL planar cell polarity protein 1	163.464	-0.0440885	1.55131	-0.0284201	0.977327	0.997305	FALSE
ENSECAG00000011472	SPRYD7	SPRY domain containing 7	143.269	-0.0420319	1.65234	-0.0254378	0.979706	0.997305	FALSE
ENSECAG00000008786	OSBP	oxysterol binding protein	230.123	-0.0417231	1.59172	-0.0262126	0.979088	0.997305	FALSE
ENSECAG00000009033	AP2B1	adaptor related protein complex 2 subunit beta 1	470.352	-0.0410056	1.31198	-0.0312547	0.975066	0.997305	FALSE
ENSECAG00000001926	FBXO31	F-box protein 31	1601.58	-0.0400115	0.797193	-0.0501905	0.959971	0.996442	FALSE
ENSECAG00000022400	CDCA7L	cell division cycle associated 7 like	1332.49	-0.0393188	0.945871	-0.0415689	0.966842	0.997138	FALSE
ENSECAG00000012894	STAU1	staufen double-stranded RNA binding protein 1	1185.48	-0.0392288	0.991198	-0.0395772	0.96843	0.997138	FALSE
ENSECAG00000013890	RPS6KB1	ribosomal protein S6 kinase B1	175.85	-0.0378356	1.75591	-0.0215475	0.982809	0.997932	FALSE
ENSECAG00000010069	XRCC2	X-ray repair cross complementing 2	1910.33	-0.0349604	0.831545	-0.0420426	0.966465	0.997138	FALSE
ENSECAG00000021777	ACTN4	actinin alpha 4	560.32	-0.0349118	1.1375	-0.0306918	0.975515	0.997305	FALSE
ENSECAG00000032490	POLR1G	RNA polymerase I subunit G	1356.52	-0.0344315	1.16946	-0.0294422	0.976512	0.997305	FALSE
ENSECAG00000031418			38.9198	-0.0338046	1.92666	-0.0175457	0.986001	0.998882	FALSE
ENSECAG00000021146	SMU1	SMU1 DNA replication regulator and spliceosomal factor	12588.9	-0.033761	0.749016	-0.0450738	0.964048	0.997138	FALSE
ENSECAG00000023961	AURKA	aurora kinase A	31946.7	-0.0325101	0.797004	-0.0407904	0.967463	0.997138	FALSE
[truncated: 1,754 more rows]

## Sheet: VIM_VS_VMATall
ensembl_gene_id	gene_name	description	baseMean	log2FoldChange	lfcSE	stat	pvalue	padj	is_differential
[truncated: 2,972 more rows]
