# Supplementary material for: Transcriptomics Reveal Molecular Differences in Equine Oocytes Vitrified before and after In Vitro Maturation
Source: Int J Mol Sci. 2023 Apr 7;24(8):6915. doi: 10.3390/ijms24086915 (PMC10138936; doi:10.3390/ijms24086915)
Supplement: Supplementary file 1 [file ijms-24-06915-s001.zip › Supplementary_File_S2_GOterms..xlsx]

## Sheet: VIM_VS_FR_bp
GENE.SET	MEAN.ABS.T0	PADOG0	P.MEAN.ABS.T	PVAL	genes_in_geneset	genenames_in_geneset
GO:0065004_protein-DNA_complex_assembly	3.56	3.44	8e-05	8e-05	ENSECAG00000012182, ENSECAG00000020174, ENSECAG00000007955, ENSECAG00000015098, ENSECAG00000010922, ENSECAG00000015040, ENSECAG00000018810, ENSECAG00000000066, ENSECAG00000038860, ENSECAG00000021001, ENSECAG00000011055, ENSECAG00000008647, ENSECAG00000018267, ENSECAG00000013127	GTF2A2, CENPW, HNRNPU, MORC3, RAD50, NASP, HELLS, NAP1L1, GTF2H5, SENP6, SPTY2D1, POT1, CENPC, PTGES3
GO:0071824_protein-DNA_complex_subunit_organization	3.16	3.02	8e-05	8e-05	ENSECAG00000012182, ENSECAG00000020174, ENSECAG00000007955, ENSECAG00000015098, ENSECAG00000032705, ENSECAG00000010922, ENSECAG00000015040, ENSECAG00000019916, ENSECAG00000018810, ENSECAG00000000066, ENSECAG00000038860, ENSECAG00000021001, ENSECAG00000002676, ENSECAG00000011055, ENSECAG00000012445, ENSECAG00000008647, ENSECAG00000018267, ENSECAG00000029603, ENSECAG00000013127	GTF2A2, CENPW, HNRNPU, MORC3, H1-3, RAD50, NASP, BPTF, HELLS, NAP1L1, GTF2H5, SENP6, SMARCA5, SPTY2D1, CHD1, POT1, CENPC, H1-4, PTGES3
GO:0006952_defense_response	2.95	2.8	8e-05	8e-05	ENSECAG00000014979, ENSECAG00000013300, ENSECAG00000023011, ENSECAG00000020602, ENSECAG00000023937, ENSECAG00000019809, ENSECAG00000003277, ENSECAG00000014473, ENSECAG00000012844, ENSECAG00000010789, ENSECAG00000005770, ENSECAG00000023884, ENSECAG00000015732, ENSECAG00000007125	AFAP1L2, CXCL10, RIPK2, NLRP4, GSDMB, CGAS, REL, SEC14L1, TICAM2, AKIRIN2, BNIP3L, NLRP13, IL37, ANKRD17
GO:0070588_calcium_ion_transmembrane_transport	2.63	2.58	8e-05	8e-05	ENSECAG00000012027, ENSECAG00000016301, ENSECAG00000007671, ENSECAG00000024593, ENSECAG00000016494	CACNA1E, MCUB, ATP2A2, SLC35G1, MICU2
GO:0006954_inflammatory_response	2.38	2.24	8e-05	8e-05	ENSECAG00000014979, ENSECAG00000013300, ENSECAG00000020602, ENSECAG00000003277, ENSECAG00000012844, ENSECAG00000023884, ENSECAG00000015732	AFAP1L2, CXCL10, NLRP4, REL, TICAM2, NLRP13, IL37
GO:0071897_DNA_biosynthetic_process	2.31	2.22	8e-05	8e-05	ENSECAG00000021720, ENSECAG00000020522, ENSECAG00000007955, ENSECAG00000024685, ENSECAG00000013162, ENSECAG00000007804, ENSECAG00000009943, ENSECAG00000007182, ENSECAG00000024473, ENSECAG00000008840, ENSECAG00000014368, ENSECAG00000013090, ENSECAG00000010922, ENSECAG00000007885, ENSECAG00000013129, ENSECAG00000019631, ENSECAG00000022599, ENSECAG00000004590, ENSECAG00000003872, ENSECAG00000021453,…	NOC3L, PRIMPOL, HNRNPU, NPM2, PCNA, REV1, RTF2, ORC6, MCM10, MCM6, MCM5, POLA1, RAD50, ORC5, TOP1MT, MCM2, RFC4, TIPIN, ZNF830, TICRR, GMNN, DBF4, PRIM1, POT1, TOP1, PTGES3, POLD3, REV3L, RFC3
GO:0006816_calcium_ion_transport	2.27	2.22	8e-05	8e-05	ENSECAG00000012027, ENSECAG00000040743, ENSECAG00000016301, ENSECAG00000007671, ENSECAG00000024593, ENSECAG00000016494	CACNA1E, SELENOK, MCUB, ATP2A2, SLC35G1, MICU2
GO:0006986_response_to_unfolded_protein	2.14	2.06	8e-05	8e-05	ENSECAG00000024205, ENSECAG00000029421, ENSECAG00000010247, ENSECAG00000037704, ENSECAG00000015773, ENSECAG00000012386, ENSECAG00000033049, ENSECAG00000021507, ENSECAG00000022307	HSPA5, HSPA2, DERL2, HSPA8, AMFR, SELENOS, SERP1, ATF6B, ATF6
GO:0034620_cellular_response_to_unfolded_protein	2.14	2.06	8e-05	8e-05	ENSECAG00000024205, ENSECAG00000029421, ENSECAG00000010247, ENSECAG00000037704, ENSECAG00000015773, ENSECAG00000012386, ENSECAG00000033049, ENSECAG00000021507, ENSECAG00000022307	HSPA5, HSPA2, DERL2, HSPA8, AMFR, SELENOS, SERP1, ATF6B, ATF6
GO:0035966_response_to_topologically_incorrect_protein	2.14	2.06	8e-05	8e-05	ENSECAG00000024205, ENSECAG00000029421, ENSECAG00000010247, ENSECAG00000037704, ENSECAG00000015773, ENSECAG00000012386, ENSECAG00000033049, ENSECAG00000021507, ENSECAG00000022307	HSPA5, HSPA2, DERL2, HSPA8, AMFR, SELENOS, SERP1, ATF6B, ATF6
GO:0035967_cellular_response_to_topologically_incorrect_protein	2.14	2.06	8e-05	8e-05	ENSECAG00000024205, ENSECAG00000029421, ENSECAG00000010247, ENSECAG00000037704, ENSECAG00000015773, ENSECAG00000012386, ENSECAG00000033049, ENSECAG00000021507, ENSECAG00000022307	HSPA5, HSPA2, DERL2, HSPA8, AMFR, SELENOS, SERP1, ATF6B, ATF6
GO:0007219_Notch_signaling_pathway	1.64	1.61	8e-05	8e-05	ENSECAG00000038178, ENSECAG00000007963, ENSECAG00000019257, ENSECAG00000028820, ENSECAG00000018425, ENSECAG00000022405, ENSECAG00000012998, ENSECAG00000008614	HEY2, ADAM10, RBPJ, HEY1, DTX2, NOTCH1, APH1A, LLGL2
GO:0072330_monocarboxylic_acid_biosynthetic_process	1.6	1.55	8e-05	8e-05	ENSECAG00000010524, ENSECAG00000023082, ENSECAG00000017251, ENSECAG00000015121, ENSECAG00000013127	DCAF5, HACD3, PARK7, ACSF3, PTGES3
GO:0030029_actin_filament-based_process	1.68	1.74	0.016	0.008	ENSECAG00000013629, ENSECAG00000009219, ENSECAG00000017234, ENSECAG00000021225, ENSECAG00000021297, ENSECAG00000024334, ENSECAG00000021002, ENSECAG00000033791, ENSECAG00000018435, ENSECAG00000011456, ENSECAG00000023879, ENSECAG00000000050, ENSECAG00000008538, ENSECAG00000007706, ENSECAG00000011991, ENSECAG00000020822, ENSECAG00000011111, ENSECAG00000009190, ENSECAG00000021545, ENSECAG00000014408,…	ADD3, ACTR2, ARHGAP17, MPRIP, SPTAN1, CARMIL1, ROCK1, RHOA, WDR1, ARPC2, IQGAP1, WASF3, SPECC1, PHACTR3, LIMA1, DIAPH1, FMNL2, TMSB4X, MTSS1, PLS1, PAK1, TPM1, ACTR3, LMOD3, TPM3, ARPC3, IQGAP2, ACTN4, MYO5A, FHOD3, ACTN1, CDC42BPA, ADD1, DIAPH3, ARFIP1, BAIAP2L1, ARPC5L, SPTBN1, TPM4, MYO6, CSRP2, ARPIN, THSD7B, CFL2, SSH2, ENAH, CFL1, LLGL2, ARHGAP18, PPP1R9B, TPM4, WASF1
GO:0030036_actin_cytoskeleton_organization	1.68	1.74	0.016	0.008	ENSECAG00000013629, ENSECAG00000009219, ENSECAG00000017234, ENSECAG00000021225, ENSECAG00000021297, ENSECAG00000024334, ENSECAG00000021002, ENSECAG00000033791, ENSECAG00000018435, ENSECAG00000011456, ENSECAG00000023879, ENSECAG00000000050, ENSECAG00000008538, ENSECAG00000007706, ENSECAG00000011991, ENSECAG00000020822, ENSECAG00000011111, ENSECAG00000009190, ENSECAG00000021545, ENSECAG00000014408,…	ADD3, ACTR2, ARHGAP17, MPRIP, SPTAN1, CARMIL1, ROCK1, RHOA, WDR1, ARPC2, IQGAP1, WASF3, SPECC1, PHACTR3, LIMA1, DIAPH1, FMNL2, TMSB4X, MTSS1, PLS1, PAK1, TPM1, ACTR3, LMOD3, TPM3, ARPC3, IQGAP2, ACTN4, MYO5A, FHOD3, ACTN1, CDC42BPA, ADD1, DIAPH3, ARFIP1, BAIAP2L1, ARPC5L, SPTBN1, TPM4, MYO6, CSRP2, ARPIN, THSD7B, CFL2, SSH2, ENAH, CFL1, LLGL2, ARHGAP18, PPP1R9B, TPM4, WASF1
GO:0006457_protein_folding	1.55	1.73	0.008	0.008	ENSECAG00000024205, ENSECAG00000020755, ENSECAG00000018846, ENSECAG00000000269, ENSECAG00000024410, ENSECAG00000018428, ENSECAG00000029421, ENSECAG00000011457, ENSECAG00000010199, ENSECAG00000026908, ENSECAG00000008968, ENSECAG00000015838, ENSECAG00000008511, ENSECAG00000037704, ENSECAG00000017953, ENSECAG00000003079, ENSECAG00000008511, ENSECAG00000020633, ENSECAG00000009335, ENSECAG00000010610,…	HSPA5, CCT2, NUDCD2, CDC37L1, EMC3, HSPH1, HSPA2, CCT8, EMC2, PFDN6, HSPD1, ST13, HSP90AB1, HSPA8, TCP1, CANX, HSP90AB1, CCT3, DNAJC3, HSP90B1, PFDN2, AHSA1, PDCL3, TBCA, PDIA4, EMC4, P4HB, DNAJC2, PDIA3, HSP90AA1, PTGES3, QSOX1, CALR
GO:0000165_MAPK_cascade	1.33	1.07	0.008	0.008	ENSECAG00000017911, ENSECAG00000021238, ENSECAG00000007654, ENSECAG00000020281, ENSECAG00000017840, ENSECAG00000008730, ENSECAG00000021091, ENSECAG00000010405, ENSECAG00000021240, ENSECAG00000022080, ENSECAG00000009958, ENSECAG00000020220, ENSECAG00000006859	PDCD10, IGF1R, KLHDC10, PAK2, PAK1, MAP4K4, TRAF6, TRIB2, SH3RF1, LAMTOR1, DUSP1, PAK5, TAOK3
GO:0045184_establishment_of_protein_localization	1.02	0.907	0.008	0.008	ENSECAG00000013384, ENSECAG00000018130, ENSECAG00000012391, ENSECAG00000024424, ENSECAG00000020655, ENSECAG00000003968, ENSECAG00000019640, ENSECAG00000011409, ENSECAG00000028144, ENSECAG00000016551, ENSECAG00000002972, ENSECAG00000018233, ENSECAG00000013226, ENSECAG00000019655, ENSECAG00000000319, ENSECAG00000009730, ENSECAG00000025004, ENSECAG00000000361, ENSECAG00000040308, ENSECAG00000017105,…	STX3, ZFAND6, ROMO1, TNPO1, GOLGA7, NUP35, TOMM20, TIMM44, TXNIP, RAB13, SCFD1, NIPBL, ZDHHC6, SVBP, SRP14, SAR1A, NUP54, HEATR3, TMED7, SEC62, VPS45, RAB11A, KPNA3, SRP72, RAB6A, NUP85, NUP153, GRPEL1, GOLPH3, NUP88, NUP214, WDR83OS, SPAG1, MFF, SEC63, ARL1, RAN, SEC61A1, ZFAND2A, KPNA4, VPS36, STX7, NUP107, TNPO3, VPS33A, TMED4, SELENOS, SPCS3, ARL4A, STAM2, STX8, SVIP, ERLEC1, RANBP3, GRIPAP1,…
GO:0015031_protein_transport	0.89	0.77	0.024	0.016	ENSECAG00000013384, ENSECAG00000018130, ENSECAG00000012391, ENSECAG00000024424, ENSECAG00000020655, ENSECAG00000003968, ENSECAG00000019640, ENSECAG00000011409, ENSECAG00000028144, ENSECAG00000016551, ENSECAG00000002972, ENSECAG00000013226, ENSECAG00000019655, ENSECAG00000000319, ENSECAG00000009730, ENSECAG00000025004, ENSECAG00000000361, ENSECAG00000040308, ENSECAG00000017105, ENSECAG00000013816,…	STX3, ZFAND6, ROMO1, TNPO1, GOLGA7, NUP35, TOMM20, TIMM44, TXNIP, RAB13, SCFD1, ZDHHC6, SVBP, SRP14, SAR1A, NUP54, HEATR3, TMED7, SEC62, VPS45, RAB11A, KPNA3, SRP72, RAB6A, NUP85, NUP153, GRPEL1, GOLPH3, NUP88, NUP214, SPAG1, MFF, SEC63, ARL1, RAN, SEC61A1, ZFAND2A, KPNA4, VPS36, STX7, NUP107, TNPO3, VPS33A, TMED4, SELENOS, SPCS3, ARL4A, STAM2, STX8, SVIP, ERLEC1, RANBP3, GRIPAP1, CNST, ARFIP1, V…
GO:0016197_endosomal_transport	1.53	1.6	0.016	0.016	ENSECAG00000020824, ENSECAG00000036345, ENSECAG00000022664, ENSECAG00000014989, ENSECAG00000012054, ENSECAG00000016346, ENSECAG00000023865, ENSECAG00000022694, ENSECAG00000016188, ENSECAG00000022158, ENSECAG00000020425, ENSECAG00000018146, ENSECAG00000003237, ENSECAG00000005038, ENSECAG00000014737, ENSECAG00000021355, ENSECAG00000019019, ENSECAG00000019987, ENSECAG00000004911, ENSECAG00000013918,…	EPS15, SNX12, SNX3, TMEM87A, ITSN1, LEPROT, RAB11A, RAB6A, REPS1, VPS4B, ITSN2, VPS36, GCC2, WASHC4, HEATR5B, STAM2, SNX1, GRIPAP1, VPS35, ZFYVE16, SNX9, ANK2, CHMP3, DENND2A
GO:0006996_organelle_organization	1.34	1.22	0.016	0.016	ENSECAG00000017894, ENSECAG00000021289, ENSECAG00000019646, ENSECAG00000016155, ENSECAG00000012810, ENSECAG00000005207, ENSECAG00000023961, ENSECAG00000021147, ENSECAG00000015766, ENSECAG00000023334, ENSECAG00000032667, ENSECAG00000022262, ENSECAG00000013384, ENSECAG00000020144, ENSECAG00000014979, ENSECAG00000000354, ENSECAG00000014169, ENSECAG00000014820, ENSECAG00000010827, ENSECAG00000015360,…	CKAP2, CCNE1, AHI1, KIF18A, TNKS2, RAB4A, AURKA, ATM, SNCA, STRIP2, INA, BRWD1, STX3, UBXN2A, AFAP1L2, PLK2, CCSER2, DSP, TEX15, IFT122, MRNIP, NSFL1C, CYLD, CBX3, ADD3, EPS15, ZFAND6, DNAAF4, ACTR2, CEP63, ROMO1, TUBAL3, PIBF1, BRD4, MEIKIN, WAPL, SORT1, MAP7D3, UBN2, EZR, ARHGAP17, NPM3, MPRIP, RIMS1, RPL5, CENPW, SPTAN1, CHD7, TMEM170A, C1H10orf90, TMEM231, NUP35, DNM1L, TOMM20, PIM3, SYT11, E…
GO:0010466_negative_regulation_of_peptidase_activity	1.25	1.07	0.016	0.016	ENSECAG00000022379, ENSECAG00000015502, ENSECAG00000023605, ENSECAG00000018209, ENSECAG00000013676	RNF34, RFFL, SERPINE3, CAAP1, CAST
GO:0010951_negative_regulation_of_endopeptidase_activity	1.25	1.07	0.016	0.016	ENSECAG00000022379, ENSECAG00000015502, ENSECAG00000023605, ENSECAG00000018209, ENSECAG00000013676	RNF34, RFFL, SERPINE3, CAAP1, CAST
GO:0043086_negative_regulation_of_catalytic_activity	1.25	1.01	0.016	0.016	ENSECAG00000022379, ENSECAG00000012588, ENSECAG00000015502, ENSECAG00000023605, ENSECAG00000007717, ENSECAG00000018209, ENSECAG00000024842, ENSECAG00000013676, ENSECAG00000008647, ENSECAG00000014300	RNF34, DTNBP1, RFFL, SERPINE3, URI1, CAAP1, SH3BP5, CAST, POT1, CBLB
GO:0090287_regulation_of_cellular_response_to_growth_factor_stimulus	1.78	1.58	0.008	0.016	ENSECAG00000011935, ENSECAG00000036584, ENSECAG00000024602, ENSECAG00000015053, ENSECAG00000022357, ENSECAG00000031442, ENSECAG00000013999, ENSECAG00000018189, ENSECAG00000018005	SMURF2, SKOR1, RNF111, SDCBP, EIF4E1B, FGF16, TSPAN3, TWSG1, PMEPA1
GO:0006869_lipid_transport	1.31	1.42	0.008	0.016	ENSECAG00000013398, ENSECAG00000000513, ENSECAG00000017349, ENSECAG00000004869, ENSECAG00000012518, ENSECAG00000007129, ENSECAG00000008270, ENSECAG00000013583	SLCO3A1, PRELID3B, CERT1, PRELID3A, ATP10D, LRP6, FABP5, CD320
GO:0072503_cellular_divalent_inorganic_cation_homeostasis	1.29	1.24	0.008	0.016	ENSECAG00000008450, ENSECAG00000006518, ENSECAG00000012027, ENSECAG00000040743, ENSECAG00000016301, ENSECAG00000007671, ENSECAG00000024593, ENSECAG00000016494, ENSECAG00000008456	ATP2B1, SLC39A10, CACNA1E, SELENOK, MCUB, ATP2A2, SLC35G1, MICU2, SLC39A6
GO:0072507_divalent_inorganic_cation_homeostasis	1.29	1.24	0.008	0.016	ENSECAG00000008450, ENSECAG00000006518, ENSECAG00000012027, ENSECAG00000040743, ENSECAG00000016301, ENSECAG00000007671, ENSECAG00000024593, ENSECAG00000016494, ENSECAG00000008456	ATP2B1, SLC39A10, CACNA1E, SELENOK, MCUB, ATP2A2, SLC35G1, MICU2, SLC39A6
GO:0034314_Arp2/3_complex-mediated_actin_nucleation	1.91	1.99	0.024	0.024	ENSECAG00000009219, ENSECAG00000024334, ENSECAG00000011456, ENSECAG00000000050, ENSECAG00000020867, ENSECAG00000020416, ENSECAG00000022286, ENSECAG00000009791, ENSECAG00000022222	ACTR2, CARMIL1, ARPC2, WASF3, ACTR3, ARPC3, ARFIP1, ARPC5L, WASF1
GO:0022607_cellular_component_assembly	2.01	1.76	0.024	0.024	ENSECAG00000019646, ENSECAG00000020144, ENSECAG00000010827, ENSECAG00000015360, ENSECAG00000006545, ENSECAG00000013629, ENSECAG00000010951, ENSECAG00000010318, ENSECAG00000015237, ENSECAG00000023410, ENSECAG00000018333, ENSECAG00000021065, ENSECAG00000012182, ENSECAG00000020174, ENSECAG00000007560, ENSECAG00000010056, ENSECAG00000001468, ENSECAG00000023433, ENSECAG00000008104, ENSECAG00000006607,…	AHI1, UBXN2A, TEX15, IFT122, NSFL1C, ADD3, DNAAF4, CEP63, PIBF1, UBN2, EZR, RPL5, GTF2A2, CENPW, FXR1, C1H10orf90, VBP1, TMEM231, DYNLL1, KIF11, ROCK1, RHOA, SNRPD2, PTPDC1, PRC1, RPS19, ATG5, CRNKL1, GEMIN2, CLASP1, SAR1A, HNRNPU, MAPRE1, PCM1, SNRPC, NUFIP1, SEPTIN7, LAMB1, WIPI2, MRPL22, ATG12, CCSAP, ARL13B, LSM14A, FBXO45, CETN2, MORC3, MAP9, TBC1D14, PFDN6, IFT46, ASF1A, CDH10, SPICE1, CEP1…
GO:0031023_microtubule_organizing_center_organization	1.67	1.67	0.024	0.024	ENSECAG00000010318, ENSECAG00000010056, ENSECAG00000011655, ENSECAG00000000796, ENSECAG00000014542, ENSECAG00000021916, ENSECAG00000009294, ENSECAG00000011152, ENSECAG00000021950, ENSECAG00000006526, ENSECAG00000004593, ENSECAG00000018114, ENSECAG00000023113, ENSECAG00000024704, ENSECAG00000008051, ENSECAG00000015563	CEP63, C1H10orf90, PCM1, CETN2, SPICE1, CEP120, PARD6B, STIL, NPM1, CENPJ, HAUS3, CEP295, SASS6, CETN3, CEP192, CKAP5
GO:0007010_cytoskeleton_organization	1.41	1.37	0.024	0.024	ENSECAG00000017894, ENSECAG00000019646, ENSECAG00000016155, ENSECAG00000023961, ENSECAG00000023334, ENSECAG00000032667, ENSECAG00000022262, ENSECAG00000014169, ENSECAG00000014820, ENSECAG00000015360, ENSECAG00000013629, ENSECAG00000010951, ENSECAG00000009219, ENSECAG00000010318, ENSECAG00000014631, ENSECAG00000015237, ENSECAG00000000644, ENSECAG00000017234, ENSECAG00000021225, ENSECAG00000021297,…	CKAP2, AHI1, KIF18A, AURKA, STRIP2, INA, BRWD1, CCSER2, DSP, IFT122, ADD3, DNAAF4, ACTR2, CEP63, TUBAL3, PIBF1, MAP7D3, ARHGAP17, MPRIP, SPTAN1, C1H10orf90, TMEM231, NUF2, BRWD3, DYNLL1, CARMIL1, KIF11, ROCK1, RHOA, DYNC1LI1, NUSAP1, WDR1, PTPDC1, PRC1, APC, ARPC2, HOOK3, CLASP1, RANBP10, HNRNPU, HAUS6, MAPRE1, KATNAL1, PCM1, IQGAP1, SEPTIN7, WASF3, MAP7D2, SPECC1, CCSAP, ARL13B, KIF18B, PHACTR3,…
GO:0006458_'de_novo'_protein_folding	2.17	2.25	0.016	0.024	ENSECAG00000024205, ENSECAG00000029421, ENSECAG00000015838, ENSECAG00000037704, ENSECAG00000007573	HSPA5, HSPA2, ST13, HSPA8, DNAJC2
GO:0006874_cellular_calcium_ion_homeostasis	1.85	1.81	0.016	0.024	ENSECAG00000008450, ENSECAG00000012027, ENSECAG00000040743, ENSECAG00000016301, ENSECAG00000007671, ENSECAG00000024593, ENSECAG00000016494	ATP2B1, CACNA1E, SELENOK, MCUB, ATP2A2, SLC35G1, MICU2
GO:0055074_calcium_ion_homeostasis	1.85	1.81	0.016	0.024	ENSECAG00000008450, ENSECAG00000012027, ENSECAG00000040743, ENSECAG00000016301, ENSECAG00000007671, ENSECAG00000024593, ENSECAG00000016494	ATP2B1, CACNA1E, SELENOK, MCUB, ATP2A2, SLC35G1, MICU2
GO:0006606_protein_import_into_nucleus	1.67	1.58	0.032	0.032	ENSECAG00000024424, ENSECAG00000003968, ENSECAG00000025004, ENSECAG00000000361, ENSECAG00000015530, ENSECAG00000019159, ENSECAG00000016010, ENSECAG00000012800, ENSECAG00000022752, ENSECAG00000020532, ENSECAG00000023235, ENSECAG00000007483, ENSECAG00000012815, ENSECAG00000000554	TNPO1, NUP35, NUP54, HEATR3, KPNA3, NUP85, NUP153, NUP88, NUP214, RAN, KPNA4, NUP107, TNPO3, KPNA7
GO:0051170_import_into_nucleus	1.67	1.58	0.032	0.032	ENSECAG00000024424, ENSECAG00000003968, ENSECAG00000025004, ENSECAG00000000361, ENSECAG00000015530, ENSECAG00000019159, ENSECAG00000016010, ENSECAG00000012800, ENSECAG00000022752, ENSECAG00000020532, ENSECAG00000023235, ENSECAG00000007483, ENSECAG00000012815, ENSECAG00000000554	TNPO1, NUP35, NUP54, HEATR3, KPNA3, NUP85, NUP153, NUP88, NUP214, RAN, KPNA4, NUP107, TNPO3, KPNA7
GO:0034504_protein_localization_to_nucleus	1.59	1.5	0.032	0.032	ENSECAG00000024424, ENSECAG00000003968, ENSECAG00000025004, ENSECAG00000000361, ENSECAG00000015530, ENSECAG00000019159, ENSECAG00000016010, ENSECAG00000012800, ENSECAG00000022752, ENSECAG00000020532, ENSECAG00000023235, ENSECAG00000007483, ENSECAG00000012815, ENSECAG00000000420, ENSECAG00000000554	TNPO1, NUP35, NUP54, HEATR3, KPNA3, NUP85, NUP153, NUP88, NUP214, RAN, KPNA4, NUP107, TNPO3, BANP, KPNA7
GO:0010876_lipid_localization	1.1	1.21	0.032	0.032	ENSECAG00000013398, ENSECAG00000024663, ENSECAG00000000513, ENSECAG00000017349, ENSECAG00000004869, ENSECAG00000024608, ENSECAG00000012518, ENSECAG00000007129, ENSECAG00000008270, ENSECAG00000013583	SLCO3A1, PLIN2, PRELID3B, CERT1, PRELID3A, SREBF2, ATP10D, LRP6, FABP5, CD320
GO:0006886_intracellular_protein_transport	1.01	0.894	0.032	0.032	ENSECAG00000013384, ENSECAG00000018130, ENSECAG00000012391, ENSECAG00000024424, ENSECAG00000020655, ENSECAG00000003968, ENSECAG00000019640, ENSECAG00000011409, ENSECAG00000002972, ENSECAG00000013226, ENSECAG00000000319, ENSECAG00000009730, ENSECAG00000025004, ENSECAG00000000361, ENSECAG00000040308, ENSECAG00000017105, ENSECAG00000013816, ENSECAG00000023865, ENSECAG00000015530, ENSECAG00000006920,…	STX3, ZFAND6, ROMO1, TNPO1, GOLGA7, NUP35, TOMM20, TIMM44, SCFD1, ZDHHC6, SRP14, SAR1A, NUP54, HEATR3, TMED7, SEC62, VPS45, RAB11A, KPNA3, SRP72, RAB6A, NUP85, NUP153, GRPEL1, NUP88, NUP214, SPAG1, MFF, SEC63, ARL1, RAN, SEC61A1, ZFAND2A, KPNA4, VPS36, STX7, NUP107, TNPO3, VPS33A, TMED4, SELENOS, SPCS3, ARL4A, STAM2, STX8, SVIP, ERLEC1, RANBP3, GRIPAP1, ARFIP1, VPS35, COPA, UHMK1, PEX1, RAB14, KP…
GO:0034613_cellular_protein_localization	1.14	0.937	0.024	0.032	ENSECAG00000019646, ENSECAG00000012810, ENSECAG00000013384, ENSECAG00000015360, ENSECAG00000018130, ENSECAG00000010951, ENSECAG00000012391, ENSECAG00000015237, ENSECAG00000016925, ENSECAG00000018333, ENSECAG00000024424, ENSECAG00000021882, ENSECAG00000022787, ENSECAG00000020655, ENSECAG00000005768, ENSECAG00000023433, ENSECAG00000003968, ENSECAG00000019640, ENSECAG00000011409, ENSECAG00000008104,…	AHI1, TNKS2, STX3, IFT122, ZFAND6, DNAAF4, ROMO1, PIBF1, WAPL, EZR, TNPO1, YWHAZ, BCAP31, GOLGA7, SEPTIN11, TMEM231, NUP35, TOMM20, TIMM44, DYNLL1, RAB13, TM9SF4, SCFD1, PTPDC1, NIPBL, ZDHHC6, SRP14, SAR1A, NUP54, MAPRE1, PCM1, HEATR3, SEPTIN7, WIPI2, ARL13B, IFT46, TMED7, SEC62, VPS45, RAB11A, SLMAP, MSN, KPNA3, SRP72, RAB6A, NUP85, ODF2L, NUP153, IFT57, GRPEL1, DRC1, TMSB4X, GOLPH3, STIL, NUP88…
GO:0070727_cellular_macromolecule_localization	1.14	0.937	0.024	0.032	ENSECAG00000019646, ENSECAG00000012810, ENSECAG00000013384, ENSECAG00000015360, ENSECAG00000018130, ENSECAG00000010951, ENSECAG00000012391, ENSECAG00000015237, ENSECAG00000016925, ENSECAG00000018333, ENSECAG00000024424, ENSECAG00000021882, ENSECAG00000022787, ENSECAG00000020655, ENSECAG00000005768, ENSECAG00000023433, ENSECAG00000003968, ENSECAG00000019640, ENSECAG00000011409, ENSECAG00000008104,…	AHI1, TNKS2, STX3, IFT122, ZFAND6, DNAAF4, ROMO1, PIBF1, WAPL, EZR, TNPO1, YWHAZ, BCAP31, GOLGA7, SEPTIN11, TMEM231, NUP35, TOMM20, TIMM44, DYNLL1, RAB13, TM9SF4, SCFD1, PTPDC1, NIPBL, ZDHHC6, SRP14, SAR1A, NUP54, MAPRE1, PCM1, HEATR3, SEPTIN7, WIPI2, ARL13B, IFT46, TMED7, SEC62, VPS45, RAB11A, SLMAP, MSN, KPNA3, SRP72, RAB6A, NUP85, ODF2L, NUP153, IFT57, GRPEL1, DRC1, TMSB4X, GOLPH3, STIL, NUP88…
GO:0098542_defense_response_to_other_organism	1.79	1.69	0.04	0.04	ENSECAG00000023011, ENSECAG00000023937, ENSECAG00000019809, ENSECAG00000003277, ENSECAG00000014473, ENSECAG00000010789, ENSECAG00000005770, ENSECAG00000007125	RIPK2, GSDMB, CGAS, REL, SEC14L1, AKIRIN2, BNIP3L, ANKRD17
GO:0000723_telomere_maintenance	1.49	1.34	0.04	0.04	ENSECAG00000012810, ENSECAG00000021147, ENSECAG00000013845, ENSECAG00000007955, ENSECAG00000010922, ENSECAG00000012679, ENSECAG00000010731, ENSECAG00000008647, ENSECAG00000013127	TNKS2, ATM, HUS1, HNRNPU, RAD50, RIF1, DCLRE1A, POT1, PTGES3
GO:0032200_telomere_organization	1.49	1.34	0.04	0.04	ENSECAG00000012810, ENSECAG00000021147, ENSECAG00000013845, ENSECAG00000007955, ENSECAG00000010922, ENSECAG00000012679, ENSECAG00000010731, ENSECAG00000008647, ENSECAG00000013127	TNKS2, ATM, HUS1, HNRNPU, RAD50, RIF1, DCLRE1A, POT1, PTGES3
GO:0043408_regulation_of_MAPK_cascade	1.12	0.896	0.04	0.04	ENSECAG00000017911, ENSECAG00000021238, ENSECAG00000007654, ENSECAG00000020281, ENSECAG00000017840, ENSECAG00000008730, ENSECAG00000021091, ENSECAG00000021240, ENSECAG00000022080, ENSECAG00000009958, ENSECAG00000020220, ENSECAG00000006859	PDCD10, IGF1R, KLHDC10, PAK2, PAK1, MAP4K4, TRAF6, SH3RF1, LAMTOR1, DUSP1, PAK5, TAOK3
GO:0016043_cellular_component_organization	1	0.803	0.04	0.04	ENSECAG00000017894, ENSECAG00000021289, ENSECAG00000019646, ENSECAG00000016155, ENSECAG00000012810, ENSECAG00000005207, ENSECAG00000023961, ENSECAG00000021147, ENSECAG00000015766, ENSECAG00000023334, ENSECAG00000032667, ENSECAG00000022262, ENSECAG00000013384, ENSECAG00000020144, ENSECAG00000014979, ENSECAG00000000354, ENSECAG00000014169, ENSECAG00000014820, ENSECAG00000010827, ENSECAG00000015360,…	CKAP2, CCNE1, AHI1, KIF18A, TNKS2, RAB4A, AURKA, ATM, SNCA, STRIP2, INA, BRWD1, STX3, UBXN2A, AFAP1L2, PLK2, CCSER2, DSP, TEX15, IFT122, MRNIP, NSFL1C, CYLD, KALRN, CBX3, ADD3, EPS15, TJP1, ZFAND6, DNAAF4, ACTR2, CEP63, ROMO1, TUBAL3, PIBF1, BRD4, MEIKIN, WAPL, SORT1, MAP7D3, UBN2, EZR, ARHGAP17, NPM3, MPRIP, RIMS1, RPL5, GTF2A2, CENPW, FXR1, SPTAN1, SEPTIN11, CHD7, TMEM170A, C1H10orf90, VBP1, TM…
GO:0031347_regulation_of_defense_response	1.4	1.44	0.072	0.048	ENSECAG00000020602, ENSECAG00000019809, ENSECAG00000014473, ENSECAG00000010789, ENSECAG00000023884	NLRP4, CGAS, SEC14L1, AKIRIN2, NLRP13
GO:0009605_response_to_external_stimulus	1.35	1.23	0.064	0.048	ENSECAG00000012967, ENSECAG00000019993, ENSECAG00000013300, ENSECAG00000023011, ENSECAG00000023274, ENSECAG00000013971, ENSECAG00000020602, ENSECAG00000023937, ENSECAG00000005729, ENSECAG00000011752, ENSECAG00000019809, ENSECAG00000013247, ENSECAG00000017195, ENSECAG00000003277, ENSECAG00000014473, ENSECAG00000022405, ENSECAG00000012844, ENSECAG00000000558, ENSECAG00000010789, ENSECAG00000031442,…	PRKAA2, KALRN, CXCL10, RIPK2, LAMA5, ATG5, NLRP4, GSDMB, RRAGA, ATG14, CGAS, PER2, NPRL3, REL, SEC14L1, NOTCH1, TICAM2, KIF5B, AKIRIN2, FGF16, BNIP3L, NLRP13, SMO, IL37, XPR1, ANKRD17, ENAH, MACO1
GO:1903825_organic_acid_transmembrane_transport	0.691	0.738	0.064	0.048	ENSECAG00000022060, ENSECAG00000013738, ENSECAG00000001058, ENSECAG00000011808, ENSECAG00000014116	SLC25A32, SLC25A13, SLC7A7, SLC25A22, SLC38A9
GO:1905039_carboxylic_acid_transmembrane_transport	0.691	0.738	0.064	0.048	ENSECAG00000022060, ENSECAG00000013738, ENSECAG00000001058, ENSECAG00000011808, ENSECAG00000014116	SLC25A32, SLC25A13, SLC7A7, SLC25A22, SLC38A9
GO:0031497_chromatin_assembly	1.82	1.82	0.04	0.048	ENSECAG00000023410, ENSECAG00000015098, ENSECAG00000014665, ENSECAG00000032705, ENSECAG00000022565, ENSECAG00000015040, ENSECAG00000010736, ENSECAG00000018810, ENSECAG00000000066, ENSECAG00000002676, ENSECAG00000011055, ENSECAG00000019336, ENSECAG00000009651, ENSECAG00000029603	UBN2, MORC3, ASF1A, H1-3, ATF7IP2, NASP, RESF1, HELLS, NAP1L1, SMARCA5, SPTY2D1, UBN1, TASOR, H1-4
GO:0008104_protein_localization	0.837	0.646	0.04	0.048	ENSECAG00000019646, ENSECAG00000012810, ENSECAG00000013384, ENSECAG00000012282, ENSECAG00000015360, ENSECAG00000020528, ENSECAG00000018130, ENSECAG00000010951, ENSECAG00000012391, ENSECAG00000015237, ENSECAG00000016925, ENSECAG00000018333, ENSECAG00000024424, ENSECAG00000021882, ENSECAG00000022787, ENSECAG00000020655, ENSECAG00000005768, ENSECAG00000023433, ENSECAG00000003968, ENSECAG00000019640,…	AHI1, TNKS2, STX3, MPP7, IFT122, TJP1, ZFAND6, DNAAF4, ROMO1, PIBF1, WAPL, EZR, TNPO1, YWHAZ, BCAP31, GOLGA7, SEPTIN11, TMEM231, NUP35, TOMM20, TIMM44, AKAP11, TXNIP, DYNLL1, NBEAL1, RAB13, TM9SF4, SCFD1, PTPDC1, NIPBL, ZDHHC6, SVBP, SRP14, SAR1A, NUP54, MAPRE1, PCM1, HEATR3, SEPTIN7, WIPI2, ARL13B, IFT46, TMED7, SEC62, VPS45, RAB11A, SLMAP, MSN, KPNA3, SRP72, INSC, RAB6A, NUP85, ODF2L, NUP153, I…
GO:0070936_protein_K48-linked_ubiquitination	1.96	1.84	0.064	0.056	ENSECAG00000022379, ENSECAG00000015773, ENSECAG00000015502, ENSECAG00000016216, ENSECAG00000016193	RNF34, AMFR, RFFL, ITCH, FBXO38
GO:0034728_nucleosome_organization	1.09	1.05	0.056	0.056	ENSECAG00000015098, ENSECAG00000032705, ENSECAG00000015040, ENSECAG00000019916, ENSECAG00000000066, ENSECAG00000002676, ENSECAG00000011055, ENSECAG00000012445, ENSECAG00000029603	MORC3, H1-3, NASP, BPTF, NAP1L1, SMARCA5, SPTY2D1, CHD1, H1-4
GO:0044257_cellular_protein_catabolic_process	0.861	0.772	0.056	0.056	ENSECAG00000020144, ENSECAG00000024205, ENSECAG00000006545, ENSECAG00000014582, ENSECAG00000028965, ENSECAG00000011935, ENSECAG00000020881, ENSECAG00000000162, ENSECAG00000035031, ENSECAG00000011878, ENSECAG00000012970, ENSECAG00000024327, ENSECAG00000011694, ENSECAG00000000064, ENSECAG00000015363, ENSECAG00000007083, ENSECAG00000021385, ENSECAG00000009988, ENSECAG00000024602, ENSECAG00000012915,…	UBXN2A, HSPA5, NSFL1C, UFL1, NEDD8, SMURF2, CTSC, TRIP12, UBB, DTL, FAF2, FBXL5, ZNRF3, ELOC, KLHL22, PCYOX1L, HUWE1, FBXO11, RNF111, KCTD13, TBC1D22B, ARIH1, FBXO45, ANAPC1, BFAR, RNF130, UBE2D1, PLAA, DERL2, UBQLN1, UBE2S, AMN1, RNF34, COPS3, CANX, UBE2K, SIAH2, RNF175, ZFAND2A, ZRANB1, VPS36, TRIB2, FBXW7, CTSV, FBXL15, CUL1, PSMD7, PSMC1, UBB, PSMD11, HECTD1, SPOPL, RPS27A, AMFR, KCTD10, SPOP…
GO:0051603_proteolysis_involved_in_cellular_protein_catabolic_process	0.861	0.772	0.056	0.056	ENSECAG00000020144, ENSECAG00000024205, ENSECAG00000006545, ENSECAG00000014582, ENSECAG00000028965, ENSECAG00000011935, ENSECAG00000020881, ENSECAG00000000162, ENSECAG00000035031, ENSECAG00000011878, ENSECAG00000012970, ENSECAG00000024327, ENSECAG00000011694, ENSECAG00000000064, ENSECAG00000015363, ENSECAG00000007083, ENSECAG00000021385, ENSECAG00000009988, ENSECAG00000024602, ENSECAG00000012915,…	UBXN2A, HSPA5, NSFL1C, UFL1, NEDD8, SMURF2, CTSC, TRIP12, UBB, DTL, FAF2, FBXL5, ZNRF3, ELOC, KLHL22, PCYOX1L, HUWE1, FBXO11, RNF111, KCTD13, TBC1D22B, ARIH1, FBXO45, ANAPC1, BFAR, RNF130, UBE2D1, PLAA, DERL2, UBQLN1, UBE2S, AMN1, RNF34, COPS3, CANX, UBE2K, SIAH2, RNF175, ZFAND2A, ZRANB1, VPS36, TRIB2, FBXW7, CTSV, FBXL15, CUL1, PSMD7, PSMC1, UBB, PSMD11, HECTD1, SPOPL, RPS27A, AMFR, KCTD10, SPOP…
GO:0006511_ubiquitin-dependent_protein_catabolic_process	1.18	1.07	0.032	0.056	ENSECAG00000020144, ENSECAG00000024205, ENSECAG00000006545, ENSECAG00000014582, ENSECAG00000011935, ENSECAG00000000162, ENSECAG00000011878, ENSECAG00000012970, ENSECAG00000024327, ENSECAG00000011694, ENSECAG00000000064, ENSECAG00000015363, ENSECAG00000021385, ENSECAG00000009988, ENSECAG00000024602, ENSECAG00000012915, ENSECAG00000023177, ENSECAG00000019466, ENSECAG00000006613, ENSECAG00000007006,…	UBXN2A, HSPA5, NSFL1C, UFL1, SMURF2, TRIP12, DTL, FAF2, FBXL5, ZNRF3, ELOC, KLHL22, HUWE1, FBXO11, RNF111, KCTD13, TBC1D22B, ARIH1, FBXO45, ANAPC1, BFAR, RNF130, UBE2D1, PLAA, DERL2, UBQLN1, UBE2S, AMN1, RNF34, COPS3, CANX, UBE2K, SIAH2, RNF175, ZFAND2A, ZRANB1, VPS36, TRIB2, FBXW7, FBXL15, CUL1, PSMD7, PSMC1, PSMD11, HECTD1, SPOPL, AMFR, KCTD10, SPOP, JKAMP, SELENOS, SH3RF1, STAM2, SVIP, NUB1, R…
GO:0007076_mitotic_chromosome_condensation	1.4	1.44	0.064	0.064	ENSECAG00000016495, ENSECAG00000007470, ENSECAG00000018370, ENSECAG00000009830, ENSECAG00000008634	NUSAP1, NCAPG, NCAPD3, PHF13, NCAPH
GO:0052547_regulation_of_peptidase_activity	1.39	1.17	0.064	0.064	ENSECAG00000006638, ENSECAG00000022379, ENSECAG00000016261, ENSECAG00000015502, ENSECAG00000023605, ENSECAG00000018209, ENSECAG00000013676	CASP8AP2, RNF34, UACA, RFFL, SERPINE3, CAAP1, CAST
GO:0052548_regulation_of_endopeptidase_activity	1.39	1.17	0.064	0.064	ENSECAG00000006638, ENSECAG00000022379, ENSECAG00000016261, ENSECAG00000015502, ENSECAG00000023605, ENSECAG00000018209, ENSECAG00000013676	CASP8AP2, RNF34, UACA, RFFL, SERPINE3, CAAP1, CAST
GO:0072657_protein_localization_to_membrane	1.04	1.01	0.064	0.064	ENSECAG00000013384, ENSECAG00000012391, ENSECAG00000020655, ENSECAG00000016551, ENSECAG00000000547, ENSECAG00000013226, ENSECAG00000025004, ENSECAG00000014459, ENSECAG00000017105, ENSECAG00000023865, ENSECAG00000019132, ENSECAG00000006920, ENSECAG00000006321, ENSECAG00000021981, ENSECAG00000006392, ENSECAG00000013475, ENSECAG00000022357, ENSECAG00000017462, ENSECAG00000013751, ENSECAG00000019987,…	STX3, ROMO1, GOLGA7, RAB13, TM9SF4, ZDHHC6, NUP54, ARL13B, SEC62, RAB11A, SLMAP, SRP72, GOLPH3, WDR83OS, SEC63, SEC61A1, EIF4E1B, TMEM150A, TM9SF3, GRIPAP1, CNST, TRAM1, SPTBN1, TSPAN3, TM9SF2, SRP19, GOPC, ZDHHC20
GO:0019941_modification-dependent_protein_catabolic_process	0.864	0.762	0.064	0.064	ENSECAG00000020144, ENSECAG00000024205, ENSECAG00000006545, ENSECAG00000014582, ENSECAG00000028965, ENSECAG00000011935, ENSECAG00000000162, ENSECAG00000035031, ENSECAG00000011878, ENSECAG00000012970, ENSECAG00000024327, ENSECAG00000011694, ENSECAG00000000064, ENSECAG00000015363, ENSECAG00000007083, ENSECAG00000021385, ENSECAG00000009988, ENSECAG00000024602, ENSECAG00000012915, ENSECAG00000023177,…	UBXN2A, HSPA5, NSFL1C, UFL1, NEDD8, SMURF2, TRIP12, UBB, DTL, FAF2, FBXL5, ZNRF3, ELOC, KLHL22, PCYOX1L, HUWE1, FBXO11, RNF111, KCTD13, TBC1D22B, ARIH1, FBXO45, ANAPC1, BFAR, RNF130, UBE2D1, PLAA, DERL2, UBQLN1, UBE2S, AMN1, RNF34, COPS3, CANX, UBE2K, SIAH2, RNF175, ZFAND2A, ZRANB1, VPS36, TRIB2, FBXW7, FBXL15, CUL1, PSMD7, PSMC1, UBB, PSMD11, HECTD1, SPOPL, RPS27A, AMFR, KCTD10, SPOP, JKAMP, SEL…
GO:0043632_modification-dependent_macromolecule_catabolic_process	0.799	0.668	0.064	0.064	ENSECAG00000020144, ENSECAG00000024205, ENSECAG00000006545, ENSECAG00000014582, ENSECAG00000028965, ENSECAG00000011935, ENSECAG00000000162, ENSECAG00000035031, ENSECAG00000011878, ENSECAG00000012970, ENSECAG00000024327, ENSECAG00000011694, ENSECAG00000000064, ENSECAG00000015363, ENSECAG00000007083, ENSECAG00000021385, ENSECAG00000009988, ENSECAG00000024602, ENSECAG00000012915, ENSECAG00000023177,…	UBXN2A, HSPA5, NSFL1C, UFL1, NEDD8, SMURF2, TRIP12, UBB, DTL, FAF2, FBXL5, ZNRF3, ELOC, KLHL22, PCYOX1L, HUWE1, FBXO11, RNF111, KCTD13, TBC1D22B, ARIH1, FBXO45, ANAPC1, BFAR, RNF130, EXOSC9, UBE2D1, PLAA, DERL2, UBQLN1, UBE2S, AMN1, RNF34, COPS3, CANX, UBE2K, SIAH2, RNF175, EXOSC8, ZFAND2A, ZRANB1, VPS36, TRIB2, FBXW7, FBXL15, CUL1, PSMD7, PSMC1, UBB, PSMD11, HECTD1, SPOPL, RPS27A, AMFR, KCTD10, …
GO:0040029_regulation_of_gene_expression,_epigenetic	1.36	1.26	0.056	0.064	ENSECAG00000022565, ENSECAG00000010736, ENSECAG00000018810, ENSECAG00000015924, ENSECAG00000009651	ATF7IP2, RESF1, HELLS, CTCF, TASOR
GO:0001816_cytokine_production	1.22	0.938	0.056	0.064	ENSECAG00000014979, ENSECAG00000006101, ENSECAG00000007205, ENSECAG00000019809, ENSECAG00000014473, ENSECAG00000012844, ENSECAG00000023771, ENSECAG00000010483	AFAP1L2, ZBTB39, ZBTB33, CGAS, SEC14L1, TICAM2, BCL6B, NFATC2IP
GO:0090092_regulation_of_transmembrane_receptor_protein_serine/threonine_kinase_signaling_pathway	0.878	0.657	0.08	0.072	ENSECAG00000023233, ENSECAG00000011935, ENSECAG00000036584, ENSECAG00000024602, ENSECAG00000020015, ENSECAG00000015053, ENSECAG00000021088, ENSECAG00000018189, ENSECAG00000018005	BMP15, SMURF2, SKOR1, RNF111, BMP6, SDCBP, GDF9, TWSG1, PMEPA1
GO:0006486_protein_glycosylation	0.786	0.812	0.072	0.072	ENSECAG00000022687, ENSECAG00000019492, ENSECAG00000003030, ENSECAG00000018381, ENSECAG00000008074, ENSECAG00000024941, ENSECAG00000000212, ENSECAG00000033049, ENSECAG00000019546	STT3A, MGAT5, RPN1, RPN2, MAGT1, ALG6, DPY19L3, SERP1, DDOST
GO:0043413_macromolecule_glycosylation	0.786	0.812	0.072	0.072	ENSECAG00000022687, ENSECAG00000019492, ENSECAG00000003030, ENSECAG00000018381, ENSECAG00000008074, ENSECAG00000024941, ENSECAG00000000212, ENSECAG00000033049, ENSECAG00000019546	STT3A, MGAT5, RPN1, RPN2, MAGT1, ALG6, DPY19L3, SERP1, DDOST
GO:0030162_regulation_of_proteolysis	0.728	0.495	0.072	0.072	ENSECAG00000014582, ENSECAG00000028965, ENSECAG00000006638, ENSECAG00000019466, ENSECAG00000022379, ENSECAG00000016261, ENSECAG00000010405, ENSECAG00000013631, ENSECAG00000018287, ENSECAG00000021240, ENSECAG00000036783, ENSECAG00000022109, ENSECAG00000015502, ENSECAG00000023605, ENSECAG00000018209, ENSECAG00000013676, ENSECAG00000019705	UFL1, NEDD8, CASP8AP2, ARIH1, RNF34, UACA, TRIB2, SPOPL, SPOP, SH3RF1, SVIP, NUB1, RFFL, SERPINE3, CAAP1, CAST, CDC20
GO:2000116_regulation_of_cysteine-type_endopeptidase_activity	1.12	0.881	0.088	0.08	ENSECAG00000006638, ENSECAG00000022379, ENSECAG00000016261, ENSECAG00000015502, ENSECAG00000018209, ENSECAG00000013676	CASP8AP2, RNF34, UACA, RFFL, CAAP1, CAST
GO:0071702_organic_substance_transport	0.678	0.63	0.088	0.08	ENSECAG00000013384, ENSECAG00000018130, ENSECAG00000012391, ENSECAG00000013398, ENSECAG00000024424, ENSECAG00000020655, ENSECAG00000003968, ENSECAG00000019640, ENSECAG00000019725, ENSECAG00000011409, ENSECAG00000021627, ENSECAG00000028144, ENSECAG00000016551, ENSECAG00000002972, ENSECAG00000031669, ENSECAG00000013226, ENSECAG00000019655, ENSECAG00000000767, ENSECAG00000000319, ENSECAG00000009730,…	STX3, ZFAND6, ROMO1, SLCO3A1, TNPO1, GOLGA7, NUP35, TOMM20, SYT11, TIMM44, SLC16A1, TXNIP, RAB13, SCFD1, SLC48A1, ZDHHC6, SVBP, SLC4A7, SRP14, SAR1A, NUP54, HEATR3, THOC3, TMED7, SEC62, VPS45, RAB11A, KPNA3, SRP72, RAB6A, NUP85, SLC25A32, NUP153, GRPEL1, GOLPH3, NUP88, TPR, NUP214, SLC25A13, SPAG1, MFF, THOC2, SEC63, ARL1, THOC6, RAN, NPM1, SLC25A5, SEC61A1, ZFAND2A, KPNA4, VPS36, STX7, SLBP, PRE…
GO:0090502_RNA_phosphodiester_bond_hydrolysis,_endonucleolytic	1.74	1.82	0.08	0.08	ENSECAG00000025168, ENSECAG00000001358, ENSECAG00000004492, ENSECAG00000023935, ENSECAG00000019415	ELAC2, BMS1, RRS1, CPSF2, FIP1L1
GO:0032101_regulation_of_response_to_external_stimulus	1.12	1.12	0.08	0.08	ENSECAG00000020602, ENSECAG00000019809, ENSECAG00000014473, ENSECAG00000010789, ENSECAG00000031442, ENSECAG00000023884	NLRP4, CGAS, SEC14L1, AKIRIN2, FGF16, NLRP13
GO:0015849_organic_acid_transport	0.71	0.788	0.08	0.08	ENSECAG00000022060, ENSECAG00000013738, ENSECAG00000001058, ENSECAG00000011808, ENSECAG00000008270, ENSECAG00000016856, ENSECAG00000014116, ENSECAG00000009611	SLC25A32, SLC25A13, SLC7A7, SLC25A22, FABP5, SLC7A2, SLC38A9, SLC15A4
GO:0030163_protein_catabolic_process	0.518	0.424	0.08	0.08	ENSECAG00000020144, ENSECAG00000024205, ENSECAG00000006545, ENSECAG00000014582, ENSECAG00000028965, ENSECAG00000011935, ENSECAG00000020881, ENSECAG00000000162, ENSECAG00000035031, ENSECAG00000011878, ENSECAG00000012970, ENSECAG00000024327, ENSECAG00000011694, ENSECAG00000000064, ENSECAG00000015363, ENSECAG00000007083, ENSECAG00000021385, ENSECAG00000009003, ENSECAG00000038761, ENSECAG00000009988,…	UBXN2A, HSPA5, NSFL1C, UFL1, NEDD8, SMURF2, CTSC, TRIP12, UBB, DTL, FAF2, FBXL5, ZNRF3, ELOC, KLHL22, PCYOX1L, HUWE1, APC, ABHD17A, FBXO11, RNF111, ABHD17B, KCTD13, TBC1D22B, ARIH1, FBXO45, ANAPC1, BFAR, RNF130, UBE2D1, PLAA, DERL2, UBQLN1, UBE2S, AMN1, RNF34, COPS3, CANX, UBE2K, SIAH2, RNF175, ZFAND2A, ZRANB1, VPS36, TRIB2, FBXW7, CTSV, FBXL15, CUL1, PSMD7, PSMC1, UBB, PSMD11, HECTD1, SPOPL, RPS…
GO:0016574_histone_ubiquitination	1.36	1.22	0.072	0.08	ENSECAG00000005374, ENSECAG00000018149, ENSECAG00000017183, ENSECAG00000037284, ENSECAG00000013193, ENSECAG00000011360, ENSECAG00000007453, ENSECAG00000033949	WAC, RNF20, PCGF6, WDR70, UHRF1, PCGF1, PCGF2, OTUB1
GO:0016482_cytosolic_transport	0.453	0.506	0.072	0.08	ENSECAG00000036345, ENSECAG00000015853, ENSECAG00000018333, ENSECAG00000022664, ENSECAG00000014989, ENSECAG00000014912, ENSECAG00000012900, ENSECAG00000022694, ENSECAG00000003237, ENSECAG00000014737, ENSECAG00000019019, ENSECAG00000004911, ENSECAG00000024436, ENSECAG00000002920, ENSECAG00000020307	SNX12, SORT1, EZR, SNX3, TMEM87A, CCDC91, MSN, RAB6A, GCC2, HEATR5B, SNX1, VPS35, ANK2, RDX, DENND2A
GO:0009101_glycoprotein_biosynthetic_process	0.465	0.496	0.072	0.08	ENSECAG00000022687, ENSECAG00000019492, ENSECAG00000023746, ENSECAG00000003030, ENSECAG00000018381, ENSECAG00000008074, ENSECAG00000024941, ENSECAG00000000212, ENSECAG00000033049, ENSECAG00000016078, ENSECAG00000019546	STT3A, MGAT5, NECAB2, RPN1, RPN2, MAGT1, ALG6, DPY19L3, SERP1, CSGALNACT2, DDOST
GO:0006865_amino_acid_transport	0.641	0.704	0.096	0.088	ENSECAG00000013738, ENSECAG00000001058, ENSECAG00000011808, ENSECAG00000016856, ENSECAG00000014116, ENSECAG00000009611	SLC25A13, SLC7A7, SLC25A22, SLC7A2, SLC38A9, SLC15A4
GO:0010498_proteasomal_protein_catabolic_process	0.797	0.666	0.096	0.088	ENSECAG00000020144, ENSECAG00000024205, ENSECAG00000006545, ENSECAG00000014582, ENSECAG00000000162, ENSECAG00000011878, ENSECAG00000012970, ENSECAG00000024327, ENSECAG00000015363, ENSECAG00000021385, ENSECAG00000012915, ENSECAG00000019466, ENSECAG00000006613, ENSECAG00000007006, ENSECAG00000016920, ENSECAG00000020120, ENSECAG00000010247, ENSECAG00000007078, ENSECAG00000022379, ENSECAG00000003079,…	UBXN2A, HSPA5, NSFL1C, UFL1, TRIP12, DTL, FAF2, FBXL5, KLHL22, HUWE1, KCTD13, ARIH1, FBXO45, ANAPC1, BFAR, PLAA, DERL2, AMN1, RNF34, CANX, UBE2K, SIAH2, RNF175, ZFAND2A, TRIB2, FBXW7, FBXL15, CUL1, PSMD7, PSMC1, HECTD1, SPOPL, KCTD10, SPOP, JKAMP, SELENOS, SH3RF1, SVIP, RFFL, ERLEC1, UBE4A, SKP2, RAD23A, PCNP, CDC20, CUL5, FBXO38, TRIM2, PSMD1, CALR
GO:0043161_proteasome-mediated_ubiquitin-dependent_protein_catabolic_process	0.797	0.666	0.096	0.088	ENSECAG00000020144, ENSECAG00000024205, ENSECAG00000006545, ENSECAG00000014582, ENSECAG00000000162, ENSECAG00000011878, ENSECAG00000012970, ENSECAG00000024327, ENSECAG00000015363, ENSECAG00000021385, ENSECAG00000012915, ENSECAG00000019466, ENSECAG00000006613, ENSECAG00000007006, ENSECAG00000016920, ENSECAG00000020120, ENSECAG00000010247, ENSECAG00000007078, ENSECAG00000022379, ENSECAG00000003079,…	UBXN2A, HSPA5, NSFL1C, UFL1, TRIP12, DTL, FAF2, FBXL5, KLHL22, HUWE1, KCTD13, ARIH1, FBXO45, ANAPC1, BFAR, PLAA, DERL2, AMN1, RNF34, CANX, UBE2K, SIAH2, RNF175, ZFAND2A, TRIB2, FBXW7, FBXL15, CUL1, PSMD7, PSMC1, HECTD1, SPOPL, KCTD10, SPOP, JKAMP, SELENOS, SH3RF1, SVIP, RFFL, ERLEC1, UBE4A, SKP2, RAD23A, PCNP, CDC20, CUL5, FBXO38, TRIM2, PSMD1, CALR
GO:0032006_regulation_of_TOR_signaling	1.17	1.1	0.088	0.088	ENSECAG00000021147, ENSECAG00000013569, ENSECAG00000005374, ENSECAG00000015363, ENSECAG00000005729, ENSECAG00000017195, ENSECAG00000021821, ENSECAG00000009564, ENSECAG00000006312	ATM, LAMTOR3, WAC, KLHL22, RRAGA, NPRL3, LAMTOR5, TSC1, LAMTOR4
GO:0030968_endoplasmic_reticulum_unfolded_protein_response	1.13	1.01	0.088	0.088	ENSECAG00000024205, ENSECAG00000010247, ENSECAG00000015773, ENSECAG00000012386, ENSECAG00000033049, ENSECAG00000021507, ENSECAG00000022307	HSPA5, DERL2, AMFR, SELENOS, SERP1, ATF6B, ATF6
GO:0031929_TOR_signaling	1.06	1.01	0.088	0.088	ENSECAG00000021147, ENSECAG00000013569, ENSECAG00000005374, ENSECAG00000015363, ENSECAG00000020453, ENSECAG00000005729, ENSECAG00000017195, ENSECAG00000021821, ENSECAG00000009564, ENSECAG00000006312	ATM, LAMTOR3, WAC, KLHL22, MAPKAP1, RRAGA, NPRL3, LAMTOR5, TSC1, LAMTOR4
GO:0006575_cellular_modified_amino_acid_metabolic_process	0.718	0.832	0.088	0.088	ENSECAG00000020890, ENSECAG00000018832, ENSECAG00000020462, ENSECAG00000015690, ENSECAG00000020243, ENSECAG00000017419, ENSECAG00000013375	PM20D2, GSTM3, GSTP1, SHMT1, CHAC2, MTHFD2, ABHD16A
GO:0006950_response_to_stress	1.1	0.851	0.08	0.088	ENSECAG00000021147, ENSECAG00000011567, ENSECAG00000012967, ENSECAG00000022520, ENSECAG00000014979, ENSECAG00000024205, ENSECAG00000014820, ENSECAG00000010827, ENSECAG00000015499, ENSECAG00000020524, ENSECAG00000014582, ENSECAG00000023670, ENSECAG00000014283, ENSECAG00000014072, ENSECAG00000019408, ENSECAG00000007560, ENSECAG00000012970, ENSECAG00000013300, ENSECAG00000013845, ENSECAG00000023011,…	ATM, UIMC1, PRKAA2, NDUFA6, AFAP1L2, HSPA5, DSP, TEX15, XPC, MRNIP, UFL1, CUL4B, NCOA7, PMS2, CAT, FXR1, FAF2, CXCL10, HUS1, RIPK2, SPRTN, MPG, NIPBL, MSH3, MLH3, BRIP1, ATG5, PRIMPOL, HSPA2, NLRP4, XRCC4, IGF1R, GSDMB, CETN2, REV1, KLHDC10, EPAS1, CDC7, RRAGA, RBBP8, APEX2, HSP90AB1, PPP4R3B, DERL2, PARG, FANCL, RAD21, MCM6, WDR76, HSPA8, MCM5, DEK, CANX, RNF168, RAD50, HSP90AB1, ATG14, CGAS, NP…
GO:0016053_organic_acid_biosynthetic_process	0.688	0.663	0.08	0.088	ENSECAG00000010524, ENSECAG00000023082, ENSECAG00000017251, ENSECAG00000015690, ENSECAG00000015865, ENSECAG00000020880, ENSECAG00000015121, ENSECAG00000013127	DCAF5, HACD3, PARK7, SHMT1, GLUL, PSPH, ACSF3, PTGES3
GO:0046394_carboxylic_acid_biosynthetic_process	0.688	0.663	0.08	0.088	ENSECAG00000010524, ENSECAG00000023082, ENSECAG00000017251, ENSECAG00000015690, ENSECAG00000015865, ENSECAG00000020880, ENSECAG00000015121, ENSECAG00000013127	DCAF5, HACD3, PARK7, SHMT1, GLUL, PSPH, ACSF3, PTGES3
GO:0032269_negative_regulation_of_cellular_protein_metabolic_process	0.389	-0.337	0.072	0.088	ENSECAG00000005798, ENSECAG00000001582, ENSECAG00000007560, ENSECAG00000019475, ENSECAG00000019655, ENSECAG00000023108, ENSECAG00000024732, ENSECAG00000015551, ENSECAG00000022379, ENSECAG00000023181, ENSECAG00000012606, ENSECAG00000016873, ENSECAG00000012956, ENSECAG00000009759, ENSECAG00000012588, ENSECAG00000036783, ENSECAG00000017165, ENSECAG00000015502, ENSECAG00000023605, ENSECAG00000018209,…	CNOT7, CNOT6L, FXR1, YTHDF1, SVBP, YTHDF2, EXOSC9, SAMD4B, RNF34, CNOT3, EXOSC8, CPEB1, DCPS, TNRC6B, DTNBP1, SVIP, ENSA, RFFL, SERPINE3, CAAP1, SH3BP5, CAST, FMR1, OTUB1, CPEB4, TRIM2, PMEPA1, CBLB
GO:0033036_macromolecule_localization	0.641	0.485	0.112	0.096	ENSECAG00000019646, ENSECAG00000012810, ENSECAG00000013384, ENSECAG00000012282, ENSECAG00000015360, ENSECAG00000020528, ENSECAG00000018130, ENSECAG00000010951, ENSECAG00000012391, ENSECAG00000015237, ENSECAG00000013398, ENSECAG00000016925, ENSECAG00000018333, ENSECAG00000024424, ENSECAG00000021882, ENSECAG00000022787, ENSECAG00000020655, ENSECAG00000005768, ENSECAG00000023433, ENSECAG00000003968,…	AHI1, TNKS2, STX3, MPP7, IFT122, TJP1, ZFAND6, DNAAF4, ROMO1, PIBF1, SLCO3A1, WAPL, EZR, TNPO1, YWHAZ, BCAP31, GOLGA7, SEPTIN11, TMEM231, NUP35, TOMM20, TIMM44, AKAP11, TXNIP, DYNLL1, NBEAL1, RAB13, TM9SF4, SCFD1, PTPDC1, NIPBL, ZDHHC6, SVBP, SRP14, SAR1A, HNRNPU, NUP54, MAPRE1, PCM1, HEATR3, SEPTIN7, WIPI2, ARL13B, THOC3, IFT46, TMED7, SEC62, VPS45, RAB11A, SLMAP, MSN, KPNA3, SRP72, INSC, RAB6A,…
GO:0017038_protein_import	0.846	0.767	0.104	0.096	ENSECAG00000012391, ENSECAG00000024424, ENSECAG00000003968, ENSECAG00000019640, ENSECAG00000011409, ENSECAG00000025004, ENSECAG00000000361, ENSECAG00000015530, ENSECAG00000019159, ENSECAG00000016010, ENSECAG00000009669, ENSECAG00000012800, ENSECAG00000022752, ENSECAG00000020532, ENSECAG00000023235, ENSECAG00000007483, ENSECAG00000012815, ENSECAG00000021379, ENSECAG00000000554	ROMO1, TNPO1, NUP35, TOMM20, TIMM44, NUP54, HEATR3, KPNA3, NUP85, NUP153, GRPEL1, NUP88, NUP214, RAN, KPNA4, NUP107, TNPO3, PEX1, KPNA7
GO:0031146_SCF-dependent_proteasomal_ubiquitin-dependent_protein_catabolic_process	1.36	1.38	0.096	0.096	ENSECAG00000024327, ENSECAG00000007078, ENSECAG00000000576, ENSECAG00000009606, ENSECAG00000013147, ENSECAG00000024437, ENSECAG00000016193	FBXL5, AMN1, FBXL15, CUL1, SKP2, CUL5, FBXO38
GO:0045321_leukocyte_activation	1.28	1.23	0.096	0.096	ENSECAG00000011917, ENSECAG00000023517, ENSECAG00000018810, ENSECAG00000012844, ENSECAG00000011541, ENSECAG00000008678	DOCK8, CYRIB, HELLS, TICAM2, PRDX2, PRDX1
GO:0010975_regulation_of_neuron_projection_development	1.49	0.699	0.088	0.096	ENSECAG00000007560, ENSECAG00000009111, ENSECAG00000010553, ENSECAG00000020281, ENSECAG00000017840, ENSECAG00000022329, ENSECAG00000000751, ENSECAG00000032992, ENSECAG00000032767, ENSECAG00000024935	FXR1, RUFY3, NGF, PAK2, PAK1, LRRC4C, NEDD4L, TIAM1, FMR1, GSK3B
GO:0034976_response_to_endoplasmic_reticulum_stress	1.06	0.975	0.064	0.096	ENSECAG00000024205, ENSECAG00000014582, ENSECAG00000012970, ENSECAG00000010247, ENSECAG00000003079, ENSECAG00000022717, ENSECAG00000030142, ENSECAG00000015773, ENSECAG00000026924, ENSECAG00000012386, ENSECAG00000033049, ENSECAG00000008848, ENSECAG00000036783, ENSECAG00000012769, ENSECAG00000011764, ENSECAG00000009583, ENSECAG00000020252, ENSECAG00000021507, ENSECAG00000008164, ENSECAG00000022307	HSPA5, UFL1, FAF2, DERL2, CANX, PDIA6, RNF175, AMFR, JKAMP, SELENOS, SERP1, PDIA4, SVIP, ERLEC1, UBE4A, P4HB, PDIA3, ATF6B, CALR, ATF6
GO:0048583_regulation_of_response_to_stimulus	0.675	0.0854	0.056	0.096	ENSECAG00000012810, ENSECAG00000021147, ENSECAG00000011567, ENSECAG00000013186, ENSECAG00000023233, ENSECAG00000014979, ENSECAG00000021358, ENSECAG00000010827, ENSECAG00000007240, ENSECAG00000011935, ENSECAG00000013569, ENSECAG00000017234, ENSECAG00000007560, ENSECAG00000024797, ENSECAG00000009706, ENSECAG00000005374, ENSECAG00000011694, ENSECAG00000006518, ENSECAG00000023011, ENSECAG00000017911,…	TNKS2, ATM, UIMC1, WWC3, BMP15, AFAP1L2, SFRP1, TEX15, CYLD, SMURF2, LAMTOR3, ARHGAP17, FXR1, PDE3B, AKAP13, WAC, ZNRF3, SLC39A10, RIPK2, PDCD10, KLHL22, CSNK1G2, APC, GNAS, SKOR1, RNF111, NLRP4, LURAP1L, IGF1R, KCTD13, LEPROT, BMP6, WWC1, DLGAP4, KLHDC10, SDCBP, RRAGA, TMEM9B, SH2B2, PAK2, PARG, PAK1, RNF34, WDR76, DEK, UACA, CGAS, ARHGEF28, MAP4K4, NPRL3, TLE1, LAMTOR5, SEC14L1, TRAF6, TICAM2, …
GO:0065003_protein-containing_complex_assembly	1.44	1.38	0.104	0.104	ENSECAG00000013629, ENSECAG00000010951, ENSECAG00000021065, ENSECAG00000012182, ENSECAG00000020174, ENSECAG00000001468, ENSECAG00000007824, ENSECAG00000009738, ENSECAG00000022215, ENSECAG00000007554, ENSECAG00000009730, ENSECAG00000007955, ENSECAG00000026848, ENSECAG00000013295, ENSECAG00000015098, ENSECAG00000026908, ENSECAG00000009648, ENSECAG00000020822, ENSECAG00000010701, ENSECAG00000017121,…	ADD3, DNAAF4, RPL5, GTF2A2, CENPW, VBP1, SNRPD2, RPS19, CRNKL1, GEMIN2, SAR1A, HNRNPU, SNRPC, NUFIP1, MORC3, PFDN6, CLIP1, DIAPH1, EIF6, RPF2, DRC1, TMSB4X, PRPF6, SCAF11, SPAG1, RAD50, NASP, RPSA, SRSF6, RUVBL1, HELLS, NAP1L1, GTF2H5, SNRPE, UNC13C, EIF5, SHMT1, RPLP0, DDX20, SNRPD3, BRIX1, SFSWAP, PRPF8, SENP6, TBCA, SNRPD2, SVIP, AIFM1, ADD1, SPTY2D1, DIAPH3, CELF2, BAIAP2L1, RPL10, NDUFS5, AT…
GO:0032956_regulation_of_actin_cytoskeleton_organization	1.04	0.976	0.104	0.104	ENSECAG00000013629, ENSECAG00000017234, ENSECAG00000024334, ENSECAG00000018435, ENSECAG00000023879, ENSECAG00000000050, ENSECAG00000009190, ENSECAG00000021545, ENSECAG00000017840, ENSECAG00000004274, ENSECAG00000013136, ENSECAG00000022286, ENSECAG00000012734, ENSECAG00000023388, ENSECAG00000015172, ENSECAG00000024764, ENSECAG00000022222	ADD3, ARHGAP17, CARMIL1, WDR1, IQGAP1, WASF3, TMSB4X, MTSS1, PAK1, IQGAP2, ADD1, ARFIP1, BAIAP2L1, ARPIN, SSH2, ARHGAP18, WASF1
GO:0032970_regulation_of_actin_filament-based_process	1.04	0.976	0.104	0.104	ENSECAG00000013629, ENSECAG00000017234, ENSECAG00000024334, ENSECAG00000018435, ENSECAG00000023879, ENSECAG00000000050, ENSECAG00000009190, ENSECAG00000021545, ENSECAG00000017840, ENSECAG00000004274, ENSECAG00000013136, ENSECAG00000022286, ENSECAG00000012734, ENSECAG00000023388, ENSECAG00000015172, ENSECAG00000024764, ENSECAG00000022222	ADD3, ARHGAP17, CARMIL1, WDR1, IQGAP1, WASF3, TMSB4X, MTSS1, PAK1, IQGAP2, ADD1, ARFIP1, BAIAP2L1, ARPIN, SSH2, ARHGAP18, WASF1
GO:0044085_cellular_component_biogenesis	1.39	1.19	0.096	0.104	ENSECAG00000019646, ENSECAG00000024920, ENSECAG00000013756, ENSECAG00000020144, ENSECAG00000010827, ENSECAG00000015360, ENSECAG00000006545, ENSECAG00000013629, ENSECAG00000010951, ENSECAG00000010318, ENSECAG00000015740, ENSECAG00000015237, ENSECAG00000023410, ENSECAG00000018333, ENSECAG00000021065, ENSECAG00000012182, ENSECAG00000020174, ENSECAG00000007560, ENSECAG00000010056, ENSECAG00000001468,…	AHI1, XPO1, RBIS, UBXN2A, TEX15, IFT122, NSFL1C, ADD3, DNAAF4, CEP63, DDX18, PIBF1, UBN2, EZR, RPL5, GTF2A2, CENPW, FXR1, C1H10orf90, VBP1, TMEM231, ESF1, HEATR1, RPL26, DYNLL1, KIF11, UTP3, ROCK1, RHOA, SNRPD2, PINX1, PTPDC1, PRC1, RPS19, ATG5, CRNKL1, GEMIN2, CLASP1, SAR1A, RPS7, HNRNPU, MAPRE1, GAR1, PCM1, SNRPC, NUFIP1, HEATR3, SEPTIN7, LTV1, LAMB1, WIPI2, MRPL22, NSA2, ATG12, CCSAP, ARL13B, …
GO:0051668_localization_within_membrane	0.639	0.619	0.128	0.112	ENSECAG00000013384, ENSECAG00000036345, ENSECAG00000012391, ENSECAG00000020655, ENSECAG00000016551, ENSECAG00000022664, ENSECAG00000000547, ENSECAG00000013226, ENSECAG00000025004, ENSECAG00000014459, ENSECAG00000017105, ENSECAG00000023865, ENSECAG00000019132, ENSECAG00000006920, ENSECAG00000006321, ENSECAG00000011453, ENSECAG00000021981, ENSECAG00000006392, ENSECAG00000013475, ENSECAG00000022357,…	STX3, SNX12, ROMO1, GOLGA7, RAB13, SNX3, TM9SF4, ZDHHC6, NUP54, ARL13B, SEC62, RAB11A, SLMAP, SRP72, GOLPH3, CCDC93, WDR83OS, SEC63, SEC61A1, EIF4E1B, TMEM150A, EXOC5, TM9SF3, GRIPAP1, CNST, TRAM1, SPTBN1, TSPAN3, TM9SF2, SRP19, GOPC, ZDHHC20
GO:0016925_protein_sumoylation	1.02	1.03	0.12	0.112	ENSECAG00000002087, ENSECAG00000018697, ENSECAG00000002816, ENSECAG00000015831, ENSECAG00000007993	SAE1, PIAS4, PIAS2, UBE2I, PIAS1
GO:0044092_negative_regulation_of_molecular_function	0.829	0.589	0.12	0.112	ENSECAG00000007240, ENSECAG00000022379, ENSECAG00000003271, ENSECAG00000000751, ENSECAG00000012588, ENSECAG00000015502, ENSECAG00000023605, ENSECAG00000007717, ENSECAG00000018209, ENSECAG00000024842, ENSECAG00000013676, ENSECAG00000008647, ENSECAG00000014300	CYLD, RNF34, ERBIN, NEDD4L, DTNBP1, RFFL, SERPINE3, URI1, CAAP1, SH3BP5, CAST, POT1, CBLB
GO:0090305_nucleic_acid_phosphodiester_bond_hydrolysis	1.04	1.01	0.112	0.112	ENSECAG00000025168, ENSECAG00000010812, ENSECAG00000001358, ENSECAG00000024732, ENSECAG00000018454, ENSECAG00000010922, ENSECAG00000012606, ENSECAG00000037284, ENSECAG00000004492, ENSECAG00000023935, ENSECAG00000019415, ENSECAG00000014960	ELAC2, EDC4, BMS1, EXOSC9, RBBP8, RAD50, EXOSC8, WDR70, RRS1, CPSF2, FIP1L1, ERI3
GO:0051346_negative_regulation_of_hydrolase_activity	1.12	0.929	0.112	0.112	ENSECAG00000022379, ENSECAG00000015502, ENSECAG00000023605, ENSECAG00000007717, ENSECAG00000018209, ENSECAG00000013676	RNF34, RFFL, SERPINE3, URI1, CAAP1, CAST
GO:0051248_negative_regulation_of_protein_metabolic_process	0.364	-0.349	0.096	0.112	ENSECAG00000005798, ENSECAG00000001582, ENSECAG00000007560, ENSECAG00000019475, ENSECAG00000019655, ENSECAG00000023108, ENSECAG00000024732, ENSECAG00000015551, ENSECAG00000022379, ENSECAG00000023181, ENSECAG00000012606, ENSECAG00000016873, ENSECAG00000012956, ENSECAG00000009759, ENSECAG00000012588, ENSECAG00000036783, ENSECAG00000017165, ENSECAG00000015502, ENSECAG00000000420, ENSECAG00000023605,…	CNOT7, CNOT6L, FXR1, YTHDF1, SVBP, YTHDF2, EXOSC9, SAMD4B, RNF34, CNOT3, EXOSC8, CPEB1, DCPS, TNRC6B, DTNBP1, SVIP, ENSA, RFFL, BANP, SERPINE3, CAAP1, SH3BP5, CAST, FMR1, OTUB1, CPEB4, TRIM2, PMEPA1, CBLB
GO:0051053_negative_regulation_of_DNA_metabolic_process	0.753	0.597	0.16	0.12	ENSECAG00000028670, ENSECAG00000007955, ENSECAG00000032705, ENSECAG00000019809, ENSECAG00000008647, ENSECAG00000029603, ENSECAG00000033949	DPPA3, HNRNPU, H1-3, CGAS, POT1, H1-4, OTUB1
GO:0000226_microtubule_cytoskeleton_organization	0.937	0.824	0.128	0.12	ENSECAG00000017894, ENSECAG00000019646, ENSECAG00000016155, ENSECAG00000023961, ENSECAG00000014169, ENSECAG00000015360, ENSECAG00000010951, ENSECAG00000010318, ENSECAG00000014631, ENSECAG00000015237, ENSECAG00000000644, ENSECAG00000010056, ENSECAG00000023433, ENSECAG00000009163, ENSECAG00000008104, ENSECAG00000006607, ENSECAG00000010584, ENSECAG00000016495, ENSECAG00000012044, ENSECAG00000017906,…	CKAP2, AHI1, KIF18A, AURKA, CCSER2, IFT122, DNAAF4, CEP63, TUBAL3, PIBF1, MAP7D3, C1H10orf90, TMEM231, NUF2, DYNLL1, KIF11, DYNC1LI1, NUSAP1, PTPDC1, PRC1, APC, HOOK3, CLASP1, HNRNPU, HAUS6, MAPRE1, KATNAL1, PCM1, SEPTIN7, MAP7D2, CCSAP, ARL13B, KIF18B, TUBA1C, CETN2, MAP9, IFT46, SPICE1, CEP120, CLIP1, TACC1, INSC, TUBE1, ODF2L, PARD6B, IFT57, TOGARAM2, DRC1, STIL, SPAG1, KIF4A, SCLT1, DCTN6, MA…
GO:0000076_DNA_replication_checkpoint_signaling	0.792	0.623	0.128	0.12	ENSECAG00000013845, ENSECAG00000009913, ENSECAG00000004590, ENSECAG00000003872, ENSECAG00000021453	HUS1, CDC6, TIPIN, ZNF830, TICRR
GO:0045861_negative_regulation_of_proteolysis	0.671	0.502	0.128	0.12	ENSECAG00000022379, ENSECAG00000036783, ENSECAG00000015502, ENSECAG00000023605, ENSECAG00000018209, ENSECAG00000013676	RNF34, SVIP, RFFL, SERPINE3, CAAP1, CAST
GO:0043933_protein-containing_complex_organization	1.33	1.23	0.12	0.12	ENSECAG00000017894, ENSECAG00000016155, ENSECAG00000013629, ENSECAG00000010951, ENSECAG00000021065, ENSECAG00000012182, ENSECAG00000020174, ENSECAG00000001468, ENSECAG00000019601, ENSECAG00000003968, ENSECAG00000007824, ENSECAG00000018435, ENSECAG00000009738, ENSECAG00000009003, ENSECAG00000022215, ENSECAG00000007554, ENSECAG00000009730, ENSECAG00000007955, ENSECAG00000025004, ENSECAG00000026848,…	CKAP2, KIF18A, ADD3, DNAAF4, RPL5, GTF2A2, CENPW, VBP1, DHX8, NUP35, SNRPD2, WDR1, RPS19, APC, CRNKL1, GEMIN2, SAR1A, HNRNPU, NUP54, SNRPC, NUFIP1, KIF18B, MORC3, PFDN6, CLIP1, DIAPH1, EIF6, RPF2, DRC1, TMSB4X, PRPF6, SCAF11, H1-3, SPAG1, RAD50, NASP, BPTF, RPSA, DNAJC17, SRSF6, RUVBL1, HELLS, NAP1L1, GTF2H5, MAP1S, SNRPE, UNC13C, EIF5, SHMT1, RPLP0, DDX20, SNRPD3, BRIX1, SFSWAP, PRPF8, SENP6, NC…
GO:0009607_response_to_biotic_stimulus	1.25	1.1	0.12	0.12	ENSECAG00000013300, ENSECAG00000023011, ENSECAG00000023937, ENSECAG00000019809, ENSECAG00000003277, ENSECAG00000014473, ENSECAG00000012844, ENSECAG00000010789, ENSECAG00000005770, ENSECAG00000015732, ENSECAG00000007125	CXCL10, RIPK2, GSDMB, CGAS, REL, SEC14L1, TICAM2, AKIRIN2, BNIP3L, IL37, ANKRD17
GO:0043207_response_to_external_biotic_stimulus	1.25	1.1	0.12	0.12	ENSECAG00000013300, ENSECAG00000023011, ENSECAG00000023937, ENSECAG00000019809, ENSECAG00000003277, ENSECAG00000014473, ENSECAG00000012844, ENSECAG00000010789, ENSECAG00000005770, ENSECAG00000015732, ENSECAG00000007125	CXCL10, RIPK2, GSDMB, CGAS, REL, SEC14L1, TICAM2, AKIRIN2, BNIP3L, IL37, ANKRD17
GO:0044419_biological_process_involved_in_interspecies_interaction_between_organisms	1.25	1.1	0.12	0.12	ENSECAG00000013300, ENSECAG00000023011, ENSECAG00000023937, ENSECAG00000019809, ENSECAG00000003277, ENSECAG00000014473, ENSECAG00000012844, ENSECAG00000010789, ENSECAG00000005770, ENSECAG00000015732, ENSECAG00000007125	CXCL10, RIPK2, GSDMB, CGAS, REL, SEC14L1, TICAM2, AKIRIN2, BNIP3L, IL37, ANKRD17
GO:0051707_response_to_other_organism	1.25	1.1	0.12	0.12	ENSECAG00000013300, ENSECAG00000023011, ENSECAG00000023937, ENSECAG00000019809, ENSECAG00000003277, ENSECAG00000014473, ENSECAG00000012844, ENSECAG00000010789, ENSECAG00000005770, ENSECAG00000015732, ENSECAG00000007125	CXCL10, RIPK2, GSDMB, CGAS, REL, SEC14L1, TICAM2, AKIRIN2, BNIP3L, IL37, ANKRD17
GO:1901137_carbohydrate_derivative_biosynthetic_process	0.634	0.565	0.12	0.12	ENSECAG00000022687, ENSECAG00000024684, ENSECAG00000029282, ENSECAG00000021725, ENSECAG00000019492, ENSECAG00000007464, ENSECAG00000023746, ENSECAG00000023269, ENSECAG00000003030, ENSECAG00000018381, ENSECAG00000021678, ENSECAG00000035324, ENSECAG00000017534, ENSECAG00000008074, ENSECAG00000012512, ENSECAG00000009708, ENSECAG00000024941, ENSECAG00000000212, ENSECAG00000018813, ENSECAG00000033049,…	STT3A, ATP5F1C, UQCRQ, TFDP2, MGAT5, RRM2, NECAB2, GMPS, RPN1, RPN2, PAPSS1, HAS3, HPRT1, MAGT1, COX6A1, UMPS, ALG6, DPY19L3, GUCY2C, SERP1, UQCRB, COX4I1, RRM1, CSGALNACT2, ATP5F1E, TYMS, PANK3, NDUFB6, COX5B, NDUFS6, DDOST, HAS2
GO:0006082_organic_acid_metabolic_process	0.516	0.5	0.12	0.12	ENSECAG00000013424, ENSECAG00000000279, ENSECAG00000014964, ENSECAG00000011118, ENSECAG00000006280, ENSECAG00000016016, ENSECAG00000023693, ENSECAG00000010524, ENSECAG00000020854, ENSECAG00000010849, ENSECAG00000020890, ENSECAG00000023082, ENSECAG00000021678, ENSECAG00000017251, ENSECAG00000020652, ENSECAG00000015690, ENSECAG00000001058, ENSECAG00000019133, ENSECAG00000015865, ENSECAG00000008963,…	KARS1, FARS2, MRPL39, GATC, LPIN2, GNPDA2, ECI1, DCAF5, TARS1, MDH1, PM20D2, HACD3, PAPSS1, PARK7, ECHDC1, SHMT1, SLC7A7, TIGAR, GLUL, LARS1, PNPLA8, POLG2, PKM, PSPH, FARSB, ACSF3, AUH, IARS2, DARS1, ACSL3, PTGES3, ODC1
GO:0043436_oxoacid_metabolic_process	0.516	0.5	0.12	0.12	ENSECAG00000013424, ENSECAG00000000279, ENSECAG00000014964, ENSECAG00000011118, ENSECAG00000006280, ENSECAG00000016016, ENSECAG00000023693, ENSECAG00000010524, ENSECAG00000020854, ENSECAG00000010849, ENSECAG00000020890, ENSECAG00000023082, ENSECAG00000021678, ENSECAG00000017251, ENSECAG00000020652, ENSECAG00000015690, ENSECAG00000001058, ENSECAG00000019133, ENSECAG00000015865, ENSECAG00000008963,…	KARS1, FARS2, MRPL39, GATC, LPIN2, GNPDA2, ECI1, DCAF5, TARS1, MDH1, PM20D2, HACD3, PAPSS1, PARK7, ECHDC1, SHMT1, SLC7A7, TIGAR, GLUL, LARS1, PNPLA8, POLG2, PKM, PSPH, FARSB, ACSF3, AUH, IARS2, DARS1, ACSL3, PTGES3, ODC1
GO:1901565_organonitrogen_compound_catabolic_process	0.413	0.339	0.112	0.12	ENSECAG00000020144, ENSECAG00000024205, ENSECAG00000006545, ENSECAG00000014582, ENSECAG00000028965, ENSECAG00000011935, ENSECAG00000020881, ENSECAG00000000162, ENSECAG00000035031, ENSECAG00000011878, ENSECAG00000012970, ENSECAG00000024327, ENSECAG00000011694, ENSECAG00000000064, ENSECAG00000015363, ENSECAG00000007083, ENSECAG00000021385, ENSECAG00000009003, ENSECAG00000038761, ENSECAG00000016016,…	UBXN2A, HSPA5, NSFL1C, UFL1, NEDD8, SMURF2, CTSC, TRIP12, UBB, DTL, FAF2, FBXL5, ZNRF3, ELOC, KLHL22, PCYOX1L, HUWE1, APC, ABHD17A, GNPDA2, FBXO11, RNF111, ABHD17B, KCTD13, TBC1D22B, ARIH1, FBXO45, ANAPC1, BFAR, RNF130, PM20D2, UBE2D1, PLAA, DERL2, UBQLN1, UBE2S, AMN1, RNF34, COPS3, CANX, UBE2K, SIAH2, RNF175, ZFAND2A, ZRANB1, VPS36, TRIB2, FBXW7, CTSV, FBXL15, CUL1, PSMD7, PSMC1, SAMHD1, UBB, PS…
GO:0033260_nuclear_DNA_replication	0.756	0.631	0.128	0.128	ENSECAG00000008840, ENSECAG00000013090, ENSECAG00000019631, ENSECAG00000003872, ENSECAG00000014613	MCM6, POLA1, MCM2, ZNF830, DBF4
GO:0044786_cell_cycle_DNA_replication	0.756	0.631	0.128	0.128	ENSECAG00000008840, ENSECAG00000013090, ENSECAG00000019631, ENSECAG00000003872, ENSECAG00000014613	MCM6, POLA1, MCM2, ZNF830, DBF4
GO:0030490_maturation_of_SSU-rRNA	0.996	1.03	0.12	0.128	ENSECAG00000021443, ENSECAG00000005387, ENSECAG00000001358, ENSECAG00000004492, ENSECAG00000012286, ENSECAG00000008252, ENSECAG00000015089	HEATR1, UTP3, BMS1, RRS1, DDX52, NOL11, RPS8
GO:0070085_glycosylation	0.582	0.615	0.144	0.136	ENSECAG00000022687, ENSECAG00000019492, ENSECAG00000003030, ENSECAG00000018381, ENSECAG00000016772, ENSECAG00000008074, ENSECAG00000024941, ENSECAG00000000212, ENSECAG00000033049, ENSECAG00000019546	STT3A, MGAT5, RPN1, RPN2, NANS, MAGT1, ALG6, DPY19L3, SERP1, DDOST
GO:0007015_actin_filament_organization	0.965	1.03	0.136	0.136	ENSECAG00000013629, ENSECAG00000009219, ENSECAG00000021225, ENSECAG00000024334, ENSECAG00000033791, ENSECAG00000018435, ENSECAG00000011456, ENSECAG00000000050, ENSECAG00000011991, ENSECAG00000020822, ENSECAG00000009190, ENSECAG00000021545, ENSECAG00000014408, ENSECAG00000014949, ENSECAG00000020867, ENSECAG00000010942, ENSECAG00000020416, ENSECAG00000021742, ENSECAG00000021186, ENSECAG00000013136,…	ADD3, ACTR2, MPRIP, CARMIL1, RHOA, WDR1, ARPC2, WASF3, LIMA1, DIAPH1, TMSB4X, MTSS1, PLS1, TPM1, ACTR3, TPM3, ARPC3, MYO5A, FHOD3, ADD1, DIAPH3, ARFIP1, BAIAP2L1, ARPC5L, TPM4, MYO6, ARPIN, CFL2, SSH2, ENAH, CFL1, ARHGAP18, PPP1R9B, TPM4, WASF1
GO:0003012_muscle_system_process	1.11	1.18	0.128	0.136	ENSECAG00000000487, ENSECAG00000014949, ENSECAG00000008709, ENSECAG00000010942, ENSECAG00000022254, ENSECAG00000022254	SYNM, TPM1, LMOD3, TPM3, TPM4, TPM4
GO:0006936_muscle_contraction	1.11	1.18	0.128	0.136	ENSECAG00000000487, ENSECAG00000014949, ENSECAG00000008709, ENSECAG00000010942, ENSECAG00000022254, ENSECAG00000022254	SYNM, TPM1, LMOD3, TPM3, TPM4, TPM4
GO:0000070_mitotic_sister_chromatid_segregation	0.593	0.483	0.16	0.144	ENSECAG00000016155, ENSECAG00000012899, ENSECAG00000009163, ENSECAG00000016495, ENSECAG00000018233, ENSECAG00000017906, ENSECAG00000007955, ENSECAG00000015641, ENSECAG00000023019, ENSECAG00000007006, ENSECAG00000007470, ENSECAG00000016392, ENSECAG00000021452, ENSECAG00000006712, ENSECAG00000015871, ENSECAG00000018367, ENSECAG00000015806, ENSECAG00000018370, ENSECAG00000009830, ENSECAG00000010047,…	KIF18A, ESCO2, NUF2, NUSAP1, NIPBL, PRC1, HNRNPU, DSCC1, KIF18B, ANAPC1, NCAPG, RAD21, BUB1B, WRAP73, CDCA8, ZWILCH, CCNB1, NCAPD3, PHF13, BUB3, KNSTRN, NCAPH, CENPC, TTK, TUBG1, ESCO1, NCAPG2, BUB1, NDC80
GO:0045087_innate_immune_response	0.87	0.744	0.144	0.144	ENSECAG00000023011, ENSECAG00000019809, ENSECAG00000003277, ENSECAG00000010789, ENSECAG00000007125	RIPK2, CGAS, REL, AKIRIN2, ANKRD17
GO:0006508_proteolysis	0.779	0.744	0.144	0.144	ENSECAG00000011567, ENSECAG00000020144, ENSECAG00000024205, ENSECAG00000006545, ENSECAG00000007240, ENSECAG00000014582, ENSECAG00000028965, ENSECAG00000011935, ENSECAG00000020881, ENSECAG00000000162, ENSECAG00000006638, ENSECAG00000035031, ENSECAG00000011878, ENSECAG00000012970, ENSECAG00000024327, ENSECAG00000009006, ENSECAG00000011694, ENSECAG00000000064, ENSECAG00000016116, ENSECAG00000007963,…	UIMC1, UBXN2A, HSPA5, NSFL1C, CYLD, UFL1, NEDD8, SMURF2, CTSC, TRIP12, CASP8AP2, UBB, DTL, FAF2, FBXL5, USP46, ZNRF3, ELOC, USP36, ADAM10, PHEX, KLHL22, PCYOX1L, HUWE1, ATG5, USP34, FBXO11, RNF111, WIPI2, KCTD13, ATG12, TBC1D22B, ARIH1, FBXO45, ANAPC1, BFAR, RNF130, PCSK5, UCHL5, TBC1D14, USP1, ATG3, ATG2B, UBE2D1, PLAA, USP7, DERL2, UBQLN1, UBE2S, AMN1, RNF34, COPS3, CANX, FURIN, UBE2K, UACA, AT…
GO:0030433_ubiquitin-dependent_ERAD_pathway	0.611	0.534	0.144	0.144	ENSECAG00000024205, ENSECAG00000012970, ENSECAG00000010247, ENSECAG00000003079, ENSECAG00000030142, ENSECAG00000026924, ENSECAG00000012386, ENSECAG00000036783, ENSECAG00000012769, ENSECAG00000011764, ENSECAG00000008164	HSPA5, FAF2, DERL2, CANX, RNF175, JKAMP, SELENOS, SVIP, ERLEC1, UBE4A, CALR
GO:0036503_ERAD_pathway	0.611	0.534	0.144	0.144	ENSECAG00000024205, ENSECAG00000012970, ENSECAG00000010247, ENSECAG00000003079, ENSECAG00000030142, ENSECAG00000026924, ENSECAG00000012386, ENSECAG00000036783, ENSECAG00000012769, ENSECAG00000011764, ENSECAG00000008164	HSPA5, FAF2, DERL2, CANX, RNF175, JKAMP, SELENOS, SVIP, ERLEC1, UBE4A, CALR
GO:0046942_carboxylic_acid_transport	0.444	0.511	0.144	0.144	ENSECAG00000013398, ENSECAG00000021627, ENSECAG00000022060, ENSECAG00000013738, ENSECAG00000011808, ENSECAG00000009611	SLCO3A1, SLC16A1, SLC25A32, SLC25A13, SLC25A22, SLC15A4
GO:0032787_monocarboxylic_acid_metabolic_process	0.793	0.719	0.128	0.144	ENSECAG00000006280, ENSECAG00000023693, ENSECAG00000010524, ENSECAG00000023082, ENSECAG00000017251, ENSECAG00000020652, ENSECAG00000019133, ENSECAG00000012878, ENSECAG00000007644, ENSECAG00000015121, ENSECAG00000008989, ENSECAG00000010765, ENSECAG00000013127	LPIN2, ECI1, DCAF5, HACD3, PARK7, ECHDC1, TIGAR, PNPLA8, PKM, ACSF3, AUH, ACSL3, PTGES3
GO:0045893_positive_regulation_of_transcription,_DNA-templated	0.649	0.21	0.128	0.144	ENSECAG00000024766, ENSECAG00000014979, ENSECAG00000022110, ENSECAG00000005699, ENSECAG00000030438, ENSECAG00000021443, ENSECAG00000014570, ENSECAG00000011391, ENSECAG00000006280, ENSECAG00000022369, ENSECAG00000007955, ENSECAG00000024602, ENSECAG00000000193, ENSECAG00000024187, ENSECAG00000008412, ENSECAG00000011120, ENSECAG00000014898, ENSECAG00000017235, ENSECAG00000024965, ENSECAG00000019159,…	CREBBP, AFAP1L2, ASXL1, SERTAD3, BRD4, HEATR1, CDK7, TET3, LPIN2, WBP2, HNRNPU, RNF111, SSBP3, SMARCA2, ICE2, THRA, LEO1, MTF1, DYRK1A, NUP85, TCEA1, EDRF1, LMO3, PTOV1, MED10, ELL, ISL2, PTMS, NPM1, MED30, MED25, MYBL1, NCOA6, KMT2B, NR1H2, BRDT, AKIRIN2, LDB1, THRAP3, ARID1A, CTCF, ING1, NCOA1, SREBF2, ATAD2, KMT2C, SMARCA5, NFATC2IP, GABPB1, BCLAF1, MED19, SUPT16H, PAXBP1, WDR75, PPRC1, RNF10,…
GO:1902680_positive_regulation_of_RNA_biosynthetic_process	0.649	0.21	0.128	0.144	ENSECAG00000024766, ENSECAG00000014979, ENSECAG00000022110, ENSECAG00000005699, ENSECAG00000030438, ENSECAG00000021443, ENSECAG00000014570, ENSECAG00000011391, ENSECAG00000006280, ENSECAG00000022369, ENSECAG00000007955, ENSECAG00000024602, ENSECAG00000000193, ENSECAG00000024187, ENSECAG00000008412, ENSECAG00000011120, ENSECAG00000014898, ENSECAG00000017235, ENSECAG00000024965, ENSECAG00000019159,…	CREBBP, AFAP1L2, ASXL1, SERTAD3, BRD4, HEATR1, CDK7, TET3, LPIN2, WBP2, HNRNPU, RNF111, SSBP3, SMARCA2, ICE2, THRA, LEO1, MTF1, DYRK1A, NUP85, TCEA1, EDRF1, LMO3, PTOV1, MED10, ELL, ISL2, PTMS, NPM1, MED30, MED25, MYBL1, NCOA6, KMT2B, NR1H2, BRDT, AKIRIN2, LDB1, THRAP3, ARID1A, CTCF, ING1, NCOA1, SREBF2, ATAD2, KMT2C, SMARCA5, NFATC2IP, GABPB1, BCLAF1, MED19, SUPT16H, PAXBP1, WDR75, PPRC1, RNF10,…
GO:1903508_positive_regulation_of_nucleic_acid-templated_transcription	0.649	0.21	0.128	0.144	ENSECAG00000024766, ENSECAG00000014979, ENSECAG00000022110, ENSECAG00000005699, ENSECAG00000030438, ENSECAG00000021443, ENSECAG00000014570, ENSECAG00000011391, ENSECAG00000006280, ENSECAG00000022369, ENSECAG00000007955, ENSECAG00000024602, ENSECAG00000000193, ENSECAG00000024187, ENSECAG00000008412, ENSECAG00000011120, ENSECAG00000014898, ENSECAG00000017235, ENSECAG00000024965, ENSECAG00000019159,…	CREBBP, AFAP1L2, ASXL1, SERTAD3, BRD4, HEATR1, CDK7, TET3, LPIN2, WBP2, HNRNPU, RNF111, SSBP3, SMARCA2, ICE2, THRA, LEO1, MTF1, DYRK1A, NUP85, TCEA1, EDRF1, LMO3, PTOV1, MED10, ELL, ISL2, PTMS, NPM1, MED30, MED25, MYBL1, NCOA6, KMT2B, NR1H2, BRDT, AKIRIN2, LDB1, THRAP3, ARID1A, CTCF, ING1, NCOA1, SREBF2, ATAD2, KMT2C, SMARCA5, NFATC2IP, GABPB1, BCLAF1, MED19, SUPT16H, PAXBP1, WDR75, PPRC1, RNF10,…
GO:0050896_response_to_stimulus	0.347	-0.00963	0.12	0.144	ENSECAG00000012810, ENSECAG00000021147, ENSECAG00000011567, ENSECAG00000012967, ENSECAG00000022520, ENSECAG00000013186, ENSECAG00000023233, ENSECAG00000017695, ENSECAG00000014979, ENSECAG00000024205, ENSECAG00000021358, ENSECAG00000014820, ENSECAG00000010827, ENSECAG00000015499, ENSECAG00000020524, ENSECAG00000007240, ENSECAG00000019837, ENSECAG00000019993, ENSECAG00000014582, ENSECAG00000023670,…	TNKS2, ATM, UIMC1, PRKAA2, NDUFA6, WWC3, BMP15, KIAA0586, AFAP1L2, HSPA5, SFRP1, DSP, TEX15, XPC, MRNIP, CYLD, PIK3R1, KALRN, UFL1, CUL4B, SMURF2, NCOA7, CASP8AP2, LAMTOR3, HEY2, PMS2, ARHGAP17, YWHAZ, CAT, FXR1, FAF2, PDE3B, AKAP13, CXCL10, PIK3CA, WAC, SYT11, PKN2, ZNRF3, ACVR2A, SLC39A10, HUS1, RIPK2, LAMA5, ROCK1, ADAM10, BNIP3, RAB13, SPRTN, MPG, ITGA1, LPIN2, AKT1, PLCB3, NIPBL, PDCD10, KLH…
GO:0009891_positive_regulation_of_biosynthetic_process	0.886	0.221	0.112	0.144	ENSECAG00000024766, ENSECAG00000014979, ENSECAG00000022110, ENSECAG00000005699, ENSECAG00000030438, ENSECAG00000007560, ENSECAG00000021443, ENSECAG00000014570, ENSECAG00000011391, ENSECAG00000006280, ENSECAG00000022369, ENSECAG00000007955, ENSECAG00000024602, ENSECAG00000000193, ENSECAG00000024187, ENSECAG00000008412, ENSECAG00000011120, ENSECAG00000014898, ENSECAG00000024685, ENSECAG00000017235,…	CREBBP, AFAP1L2, ASXL1, SERTAD3, BRD4, FXR1, HEATR1, CDK7, TET3, LPIN2, WBP2, HNRNPU, RNF111, SSBP3, SMARCA2, ICE2, THRA, LEO1, NPM2, MTF1, DYRK1A, NUP85, TCEA1, EDRF1, LMO3, PTOV1, MED10, ELL, ISL2, PTMS, NPM1, CNBP, MED30, MED25, MYBL1, NCOA6, KMT2B, NR1H2, UPF3A, BRDT, AKIRIN2, LDB1, THRAP3, ARID1A, CTCF, ING1, NCOA1, SREBF2, ATAD2, KMT2C, DBF4, SSB, SMARCA5, NFATC2IP, LARP1, GABPB1, UHMK1, BC…
GO:0010557_positive_regulation_of_macromolecule_biosynthetic_process	0.886	0.221	0.112	0.144	ENSECAG00000024766, ENSECAG00000014979, ENSECAG00000022110, ENSECAG00000005699, ENSECAG00000030438, ENSECAG00000007560, ENSECAG00000021443, ENSECAG00000014570, ENSECAG00000011391, ENSECAG00000006280, ENSECAG00000022369, ENSECAG00000007955, ENSECAG00000024602, ENSECAG00000000193, ENSECAG00000024187, ENSECAG00000008412, ENSECAG00000011120, ENSECAG00000014898, ENSECAG00000024685, ENSECAG00000017235,…	CREBBP, AFAP1L2, ASXL1, SERTAD3, BRD4, FXR1, HEATR1, CDK7, TET3, LPIN2, WBP2, HNRNPU, RNF111, SSBP3, SMARCA2, ICE2, THRA, LEO1, NPM2, MTF1, DYRK1A, NUP85, TCEA1, EDRF1, LMO3, PTOV1, MED10, ELL, ISL2, PTMS, NPM1, CNBP, MED30, MED25, MYBL1, NCOA6, KMT2B, NR1H2, UPF3A, BRDT, AKIRIN2, LDB1, THRAP3, ARID1A, CTCF, ING1, NCOA1, SREBF2, ATAD2, KMT2C, DBF4, SSB, SMARCA5, NFATC2IP, LARP1, GABPB1, UHMK1, BC…
GO:0031328_positive_regulation_of_cellular_biosynthetic_process	0.886	0.221	0.112	0.144	ENSECAG00000024766, ENSECAG00000014979, ENSECAG00000022110, ENSECAG00000005699, ENSECAG00000030438, ENSECAG00000007560, ENSECAG00000021443, ENSECAG00000014570, ENSECAG00000011391, ENSECAG00000006280, ENSECAG00000022369, ENSECAG00000007955, ENSECAG00000024602, ENSECAG00000000193, ENSECAG00000024187, ENSECAG00000008412, ENSECAG00000011120, ENSECAG00000014898, ENSECAG00000024685, ENSECAG00000017235,…	CREBBP, AFAP1L2, ASXL1, SERTAD3, BRD4, FXR1, HEATR1, CDK7, TET3, LPIN2, WBP2, HNRNPU, RNF111, SSBP3, SMARCA2, ICE2, THRA, LEO1, NPM2, MTF1, DYRK1A, NUP85, TCEA1, EDRF1, LMO3, PTOV1, MED10, ELL, ISL2, PTMS, NPM1, CNBP, MED30, MED25, MYBL1, NCOA6, KMT2B, NR1H2, UPF3A, BRDT, AKIRIN2, LDB1, THRAP3, ARID1A, CTCF, ING1, NCOA1, SREBF2, ATAD2, KMT2C, DBF4, SSB, SMARCA5, NFATC2IP, LARP1, GABPB1, UHMK1, BC…
GO:0006915_apoptotic_process	0.909	0.78	0.168	0.152	ENSECAG00000008992, ENSECAG00000020286, ENSECAG00000007240, ENSECAG00000006638, ENSECAG00000019545, ENSECAG00000021929, ENSECAG00000031204, ENSECAG00000020071, ENSECAG00000016116, ENSECAG00000017458, ENSECAG00000009988, ENSECAG00000008466, ENSECAG00000010553, ENSECAG00000022379, ENSECAG00000016261, ENSECAG00000042372, ENSECAG00000014198, ENSECAG00000006524, ENSECAG00000000517, ENSECAG00000011461,…	HYPK, BIRC7, CYLD, CASP8AP2, BIRC6, DNM1L, PIM3, XIAP, USP36, BNIP3, FBXO11, BIRC5, NGF, RNF34, UACA, PTMS, MTCH2, FANK1, HTRA2, ARMC10, SH3RF1, BNIP3L, BAG3, RFFL, BIRC3, ABL2, CASP7, CAAP1, BCL10, TAOK1, SIVA1, TCHP, EYA1, ABL1, GSK3B
GO:0070828_heterochromatin_organization	0.764	0.751	0.168	0.152	ENSECAG00000022565, ENSECAG00000010736, ENSECAG00000018810, ENSECAG00000007787, ENSECAG00000009651	ATF7IP2, RESF1, HELLS, HP1BP3, TASOR
GO:0044265_cellular_macromolecule_catabolic_process	0.454	0.068	0.144	0.152	ENSECAG00000005798, ENSECAG00000020144, ENSECAG00000024205, ENSECAG00000001582, ENSECAG00000006545, ENSECAG00000018988, ENSECAG00000014582, ENSECAG00000028965, ENSECAG00000011935, ENSECAG00000017022, ENSECAG00000020881, ENSECAG00000000162, ENSECAG00000035031, ENSECAG00000010812, ENSECAG00000011878, ENSECAG00000007560, ENSECAG00000012970, ENSECAG00000024327, ENSECAG00000011694, ENSECAG00000019475,…	CNOT7, UBXN2A, HSPA5, CNOT6L, NSFL1C, XRN2, UFL1, NEDD8, SMURF2, UPF2, CTSC, TRIP12, UBB, EDC4, DTL, FXR1, FAF2, FBXL5, ZNRF3, YTHDF1, ELOC, ZCCHC17, KLHL22, PCYOX1L, HUWE1, HNRNPU, FBXO11, RNF111, KCTD13, TBC1D22B, ARIH1, FBXO45, YTHDF2, ANAPC1, BFAR, RNF130, PCNA, EXOSC9, SAMD4B, UBE2D1, PLAA, DERL2, UBQLN1, UBE2S, AMN1, RNF34, ANGEL2, COPS3, POLA1, CANX, UBE2K, CNOT3, SIAH2, RNF175, EXOSC8, ZF…
GO:0051276_chromosome_organization	1.02	0.837	0.168	0.16	ENSECAG00000016155, ENSECAG00000012810, ENSECAG00000021147, ENSECAG00000010827, ENSECAG00000012780, ENSECAG00000030438, ENSECAG00000016913, ENSECAG00000016925, ENSECAG00000023410, ENSECAG00000007524, ENSECAG00000020174, ENSECAG00000001445, ENSECAG00000012899, ENSECAG00000009163, ENSECAG00000013845, ENSECAG00000001042, ENSECAG00000025118, ENSECAG00000016495, ENSECAG00000018233, ENSECAG00000017906,…	KIF18A, TNKS2, ATM, TEX15, CBX3, BRD4, MEIKIN, WAPL, UBN2, NPM3, CENPW, CHD7, ESCO2, NUF2, HUS1, PHF1, TADA2A, NUSAP1, NIPBL, PRC1, HNRNPU, DSCC1, TERB1, KIF18B, ANAPC1, MORC3, NPM2, ASF1A, SATB1, BRD2, NCAPG, SMC1A, RAD21, MCM6, H1-3, KDM4A, BUB1B, ATF7IP2, HCFC1, CFDP1, RAD50, NASP, TOP1MT, RESF1, WRAP73, NPM1, BPTF, MCM2, CDCA8, RUVBL1, HELLS, NAP1L1, SMC1B, ZWILCH, NUP107, RIF1, BRDT, KDM5A, …
GO:0071705_nitrogen_compound_transport	0.432	0.347	0.168	0.16	ENSECAG00000013384, ENSECAG00000018130, ENSECAG00000012391, ENSECAG00000024424, ENSECAG00000020655, ENSECAG00000003968, ENSECAG00000019640, ENSECAG00000019725, ENSECAG00000011409, ENSECAG00000028144, ENSECAG00000016551, ENSECAG00000002972, ENSECAG00000031669, ENSECAG00000013226, ENSECAG00000019655, ENSECAG00000000319, ENSECAG00000009730, ENSECAG00000025004, ENSECAG00000000361, ENSECAG00000011555,…	STX3, ZFAND6, ROMO1, TNPO1, GOLGA7, NUP35, TOMM20, SYT11, TIMM44, TXNIP, RAB13, SCFD1, SLC48A1, ZDHHC6, SVBP, SRP14, SAR1A, NUP54, HEATR3, THOC3, TMED7, SEC62, VPS45, RAB11A, KPNA3, SRP72, RAB6A, NUP85, SLC25A32, NUP153, GRPEL1, GOLPH3, NUP88, TPR, NUP214, SLC25A13, SPAG1, MFF, THOC2, SEC63, ARL1, THOC6, RAN, NPM1, SLC25A5, SEC61A1, ZFAND2A, KPNA4, VPS36, STX7, SLBP, NUP107, TNPO3, VPS33A, SLC7A7…
GO:0071103_DNA_conformation_change	1.67	1.67	0.152	0.16	ENSECAG00000016925, ENSECAG00000023410, ENSECAG00000016495, ENSECAG00000015098, ENSECAG00000014665, ENSECAG00000007470, ENSECAG00000008840, ENSECAG00000032705, ENSECAG00000022565, ENSECAG00000010922, ENSECAG00000015040, ENSECAG00000013129, ENSECAG00000010736, ENSECAG00000019631, ENSECAG00000018810, ENSECAG00000000066, ENSECAG00000011405, ENSECAG00000018370, ENSECAG00000002676, ENSECAG00000009830,…	WAPL, UBN2, NUSAP1, MORC3, ASF1A, NCAPG, MCM6, H1-3, ATF7IP2, RAD50, NASP, TOP1MT, RESF1, MCM2, HELLS, NAP1L1, BLM, NCAPD3, SMARCA5, PHF13, SPTY2D1, UBN1, NCAPH, TASOR, TOP1, H1-4
GO:0007051_spindle_organization	0.937	0.952	0.216	0.168	ENSECAG00000023961, ENSECAG00000009163, ENSECAG00000006607, ENSECAG00000017906, ENSECAG00000021391, ENSECAG00000007955, ENSECAG00000010222, ENSECAG00000005178, ENSECAG00000006869, ENSECAG00000014542, ENSECAG00000011152, ENSECAG00000010859, ENSECAG00000022136, ENSECAG00000012845, ENSECAG00000006712, ENSECAG00000016553, ENSECAG00000021001, ENSECAG00000007562, ENSECAG00000004593, ENSECAG00000010666,…	AURKA, NUF2, KIF11, PRC1, CLASP1, HNRNPU, MAPRE1, CCSAP, MAP9, SPICE1, STIL, KIF4A, DCTN6, MAPRE2, WRAP73, HAUS1, SENP6, AUNIP, HAUS3, KNSTRN, CEP192, TUBG1, CKAP5, EFHC1
GO:0070192_chromosome_organization_involved_in_meiotic_cell_cycle	0.679	0.575	0.2	0.168	ENSECAG00000010827, ENSECAG00000016913, ENSECAG00000017824, ENSECAG00000016392, ENSECAG00000021452, ENSECAG00000010922, ENSECAG00000018370, ENSECAG00000017103	TEX15, MEIKIN, TERB1, RAD21, BUB1B, RAD50, NCAPD3, BUB1
GO:0007052_mitotic_spindle_organization	0.925	0.919	0.192	0.168	ENSECAG00000023961, ENSECAG00000009163, ENSECAG00000006607, ENSECAG00000017906, ENSECAG00000021391, ENSECAG00000007955, ENSECAG00000005178, ENSECAG00000006869, ENSECAG00000014542, ENSECAG00000011152, ENSECAG00000010859, ENSECAG00000022136, ENSECAG00000006712, ENSECAG00000008051, ENSECAG00000027735, ENSECAG00000015563, ENSECAG00000008434	AURKA, NUF2, KIF11, PRC1, CLASP1, HNRNPU, CCSAP, MAP9, SPICE1, STIL, KIF4A, DCTN6, WRAP73, CEP192, TUBG1, CKAP5, EFHC1
GO:0006261_DNA-templated_DNA_replication	0.626	0.582	0.176	0.168	ENSECAG00000021720, ENSECAG00000020522, ENSECAG00000013162, ENSECAG00000009943, ENSECAG00000007182, ENSECAG00000024473, ENSECAG00000008840, ENSECAG00000014368, ENSECAG00000013090, ENSECAG00000007885, ENSECAG00000019631, ENSECAG00000022599, ENSECAG00000004590, ENSECAG00000003872, ENSECAG00000021453, ENSECAG00000014613, ENSECAG00000015297, ENSECAG00000012624, ENSECAG00000021614	NOC3L, PRIMPOL, PCNA, RTF2, ORC6, MCM10, MCM6, MCM5, POLA1, ORC5, MCM2, RFC4, TIPIN, ZNF830, TICRR, DBF4, PRIM1, POLD3, RFC3
GO:0012501_programmed_cell_death	0.967	0.825	0.168	0.168	ENSECAG00000008992, ENSECAG00000020286, ENSECAG00000007240, ENSECAG00000006638, ENSECAG00000019545, ENSECAG00000021929, ENSECAG00000031204, ENSECAG00000020071, ENSECAG00000016116, ENSECAG00000017458, ENSECAG00000009988, ENSECAG00000023937, ENSECAG00000008466, ENSECAG00000010553, ENSECAG00000022379, ENSECAG00000016261, ENSECAG00000042372, ENSECAG00000014198, ENSECAG00000006524, ENSECAG00000000517,…	HYPK, BIRC7, CYLD, CASP8AP2, BIRC6, DNM1L, PIM3, XIAP, USP36, BNIP3, FBXO11, GSDMB, BIRC5, NGF, RNF34, UACA, PTMS, MTCH2, FANK1, HTRA2, ARMC10, TIGAR, SH3RF1, BNIP3L, BAG3, AIFM1, RFFL, BIRC3, SPATA2, ABL2, CASP7, CAAP1, BCL10, TAOK1, SIVA1, TCHP, EYA1, ABL1, GSK3B
GO:0006790_sulfur_compound_metabolic_process	0.645	0.723	0.168	0.168	ENSECAG00000007391, ENSECAG00000021678, ENSECAG00000000060, ENSECAG00000018832, ENSECAG00000020462, ENSECAG00000020243, ENSECAG00000016078, ENSECAG00000019618, ENSECAG00000010765, ENSECAG00000011122, ENSECAG00000019023	MAT2A, PAPSS1, CIAPIN1, GSTM3, GSTP1, CHAC2, CSGALNACT2, FAR1, ACSL3, SUCLA2, ACOT9
GO:0007167_enzyme_linked_receptor_protein_signaling_pathway	0.688	0.369	0.168	0.168	ENSECAG00000023233, ENSECAG00000014979, ENSECAG00000019837, ENSECAG00000011935, ENSECAG00000000138, ENSECAG00000013706, ENSECAG00000036584, ENSECAG00000024602, ENSECAG00000021238, ENSECAG00000016346, ENSECAG00000020015, ENSECAG00000015053, ENSECAG00000022649, ENSECAG00000010553, ENSECAG00000015132, ENSECAG00000033344, ENSECAG00000020259, ENSECAG00000015006, ENSECAG00000018506, ENSECAG00000022357,…	BMP15, AFAP1L2, PIK3R1, SMURF2, ACVR2A, SMAD6, SKOR1, RNF111, IGF1R, LEPROT, BMP6, SDCBP, SMAD1, NGF, SMAD2, PIK3R3, SMAD3, FGFR1, SMAD5, EIF4E1B, GUCY2C, FGF16, CPNE3, GDF9, ACVR1B, TSPAN3, SAMD12, GIGYF2, TWSG1, PMEPA1, GSK3B, CBLB
GO:0006839_mitochondrial_transport	0.432	0.367	0.168	0.168	ENSECAG00000012391, ENSECAG00000019640, ENSECAG00000011409, ENSECAG00000017458, ENSECAG00000009669, ENSECAG00000022600, ENSECAG00000004389, ENSECAG00000005770, ENSECAG00000025162, ENSECAG00000014253	ROMO1, TOMM20, TIMM44, BNIP3, GRPEL1, SPAG1, MFF, BNIP3L, ATP5F1E, PMPCB
GO:0006520_cellular_amino_acid_metabolic_process	0.126	0.172	0.168	0.168	ENSECAG00000013424, ENSECAG00000000279, ENSECAG00000014964, ENSECAG00000011118, ENSECAG00000020854, ENSECAG00000015690, ENSECAG00000001058, ENSECAG00000015865, ENSECAG00000008963, ENSECAG00000023052, ENSECAG00000020880, ENSECAG00000023086, ENSECAG00000022576, ENSECAG00000024197, ENSECAG00000022690	KARS1, FARS2, MRPL39, GATC, TARS1, SHMT1, SLC7A7, GLUL, LARS1, POLG2, PSPH, FARSB, IARS2, DARS1, ODC1
GO:0006875_cellular_metal_ion_homeostasis	0.687	0.649	0.16	0.168	ENSECAG00000008450, ENSECAG00000006518, ENSECAG00000012027, ENSECAG00000008683, ENSECAG00000040743, ENSECAG00000016301, ENSECAG00000024623, ENSECAG00000007671, ENSECAG00000024593, ENSECAG00000016494, ENSECAG00000008456, ENSECAG00000017771	ATP2B1, SLC39A10, CACNA1E, FTH1, SELENOK, MCUB, ATP1A1, ATP2A2, SLC35G1, MICU2, SLC39A6, ATP1B1
GO:0031344_regulation_of_cell_projection_organization	1.12	0.393	0.16	0.168	ENSECAG00000007560, ENSECAG00000009111, ENSECAG00000022058, ENSECAG00000010553, ENSECAG00000020281, ENSECAG00000017840, ENSECAG00000022329, ENSECAG00000014922, ENSECAG00000000751, ENSECAG00000011337, ENSECAG00000032992, ENSECAG00000032767, ENSECAG00000010463, ENSECAG00000024935	FXR1, RUFY3, ODF2L, NGF, PAK2, PAK1, LRRC4C, EPS8, NEDD4L, ODF2, TIAM1, FMR1, ENTR1, GSK3B
GO:0120035_regulation_of_plasma_membrane_bounded_cell_projection_organization	1.12	0.393	0.16	0.168	ENSECAG00000007560, ENSECAG00000009111, ENSECAG00000022058, ENSECAG00000010553, ENSECAG00000020281, ENSECAG00000017840, ENSECAG00000022329, ENSECAG00000014922, ENSECAG00000000751, ENSECAG00000011337, ENSECAG00000032992, ENSECAG00000032767, ENSECAG00000010463, ENSECAG00000024935	FXR1, RUFY3, ODF2L, NGF, PAK2, PAK1, LRRC4C, EPS8, NEDD4L, ODF2, TIAM1, FMR1, ENTR1, GSK3B
GO:0072659_protein_localization_to_plasma_membrane	0.852	0.788	0.184	0.176	ENSECAG00000020655, ENSECAG00000016551, ENSECAG00000023865, ENSECAG00000019132, ENSECAG00000006321, ENSECAG00000022357, ENSECAG00000017462, ENSECAG00000019987, ENSECAG00000019039, ENSECAG00000014446, ENSECAG00000013999, ENSECAG00000009566	GOLGA7, RAB13, RAB11A, SLMAP, GOLPH3, EIF4E1B, TMEM150A, GRIPAP1, CNST, SPTBN1, TSPAN3, GOPC
GO:0120031_plasma_membrane_bounded_cell_projection_assembly	0.629	0.0845	0.144	0.176	ENSECAG00000019646, ENSECAG00000015360, ENSECAG00000010951, ENSECAG00000015237, ENSECAG00000007560, ENSECAG00000023433, ENSECAG00000008104, ENSECAG00000012044, ENSECAG00000011655, ENSECAG00000022693, ENSECAG00000014459, ENSECAG00000014240, ENSECAG00000022058, ENSECAG00000011438, ENSECAG00000020710, ENSECAG00000022379, ENSECAG00000022600, ENSECAG00000024050, ENSECAG00000009886, ENSECAG00000020513,…	AHI1, IFT122, DNAAF4, PIBF1, FXR1, TMEM231, DYNLL1, PTPDC1, PCM1, SEPTIN7, ARL13B, IFT46, ODF2L, IFT57, DRC1, RNF34, SPAG1, SCLT1, TRAF3IP1, CEP89, EPS8, CEP20, IQCB1, OFD1, SEPTIN2, BBS5, CENPJ, ODF2, IFT74, BBS7, RFFL, HYLS1, CEP41, CCDC66, FMR1, CFAP20, TAOK1, IFT88, FBXW8, ENTR1
GO:0009892_negative_regulation_of_metabolic_process	0.383	-0.299	0.136	0.176	ENSECAG00000005798, ENSECAG00000001582, ENSECAG00000011357, ENSECAG00000018988, ENSECAG00000024605, ENSECAG00000012780, ENSECAG00000017022, ENSECAG00000006101, ENSECAG00000011063, ENSECAG00000028670, ENSECAG00000010812, ENSECAG00000007560, ENSECAG00000019475, ENSECAG00000025040, ENSECAG00000019655, ENSECAG00000032622, ENSECAG00000023512, ENSECAG00000000178, ENSECAG00000007955, ENSECAG00000036584,…	CNOT7, CNOT6L, GATAD2B, XRN2, SIN3A, CBX3, UPF2, ZBTB39, MOV10L1, DPPA3, EDC4, FXR1, YTHDF1, ZCCHC17, SVBP, HMX1, MTA3, RUNX1T1, HNRNPU, SKOR1, SUDS3, ZBTB33, NCOR1, N4BP2L2, MIER1, ID3, THRA, DCAF5, PIWIL1, YTHDF2, CIART, ZC3H7A, EXOSC9, SAP18, SAMD4B, BRMS1, H1-3, RNF34, ANGEL2, ZNF684, ATF7IP2, CNOT3, CGAS, PER2, RESF1, EXOSC8, DNMT3A, GATAD2A, CPEB1, HELLS, TIPIN, SMARCE1, SRRT, ZNF830, NR1H2…
GO:0051270_regulation_of_cellular_component_movement	0.505	0.436	0.2	0.184	ENSECAG00000011917, ENSECAG00000020710, ENSECAG00000009190, ENSECAG00000011462, ENSECAG00000031442, ENSECAG00000011027, ENSECAG00000009655	DOCK8, DRC1, TMSB4X, SRGAP1, FGF16, CFAP20, SINHCAF
GO:0007276_gamete_generation	0.367	0.372	0.2	0.184	ENSECAG00000010827, ENSECAG00000016913, ENSECAG00000017037, ENSECAG00000022013, ENSECAG00000009748	TEX15, MEIKIN, TDRD5, IFTAP, TDRD1
GO:0048232_male_gamete_generation	0.367	0.372	0.2	0.184	ENSECAG00000010827, ENSECAG00000016913, ENSECAG00000017037, ENSECAG00000022013, ENSECAG00000009748	TEX15, MEIKIN, TDRD5, IFTAP, TDRD1
GO:0048609_multicellular_organismal_reproductive_process	0.367	0.372	0.2	0.184	ENSECAG00000010827, ENSECAG00000016913, ENSECAG00000017037, ENSECAG00000022013, ENSECAG00000009748	TEX15, MEIKIN, TDRD5, IFTAP, TDRD1
GO:0090501_RNA_phosphodiester_bond_hydrolysis	0.812	0.782	0.192	0.184	ENSECAG00000025168, ENSECAG00000001358, ENSECAG00000024732, ENSECAG00000012606, ENSECAG00000004492, ENSECAG00000023935, ENSECAG00000019415, ENSECAG00000014960	ELAC2, BMS1, EXOSC9, EXOSC8, RRS1, CPSF2, FIP1L1, ERI3
GO:0030334_regulation_of_cell_migration	0.697	0.659	0.192	0.184	ENSECAG00000011917, ENSECAG00000009190, ENSECAG00000011462, ENSECAG00000031442, ENSECAG00000009655	DOCK8, TMSB4X, SRGAP1, FGF16, SINHCAF
GO:0030198_extracellular_matrix_organization	0.593	0.654	0.192	0.184	ENSECAG00000020193, ENSECAG00000008303, ENSECAG00000035324, ENSECAG00000000480, ENSECAG00000021206	TGFBI, LAMB1, HAS3, ABI3BP, HAS2
GO:0043062_extracellular_structure_organization	0.593	0.654	0.192	0.184	ENSECAG00000020193, ENSECAG00000008303, ENSECAG00000035324, ENSECAG00000000480, ENSECAG00000021206	TGFBI, LAMB1, HAS3, ABI3BP, HAS2
GO:0045229_external_encapsulating_structure_organization	0.593	0.654	0.192	0.184	ENSECAG00000020193, ENSECAG00000008303, ENSECAG00000035324, ENSECAG00000000480, ENSECAG00000021206	TGFBI, LAMB1, HAS3, ABI3BP, HAS2
GO:0010390_histone_monoubiquitination	0.672	0.564	0.192	0.184	ENSECAG00000005374, ENSECAG00000018149, ENSECAG00000017183, ENSECAG00000013193, ENSECAG00000011360, ENSECAG00000007453	WAC, RNF20, PCGF6, UHRF1, PCGF1, PCGF2
GO:0070848_response_to_growth_factor	0.359	0.121	0.184	0.184	ENSECAG00000023233, ENSECAG00000011935, ENSECAG00000000138, ENSECAG00000013706, ENSECAG00000036584, ENSECAG00000024602, ENSECAG00000015053, ENSECAG00000022649, ENSECAG00000010553, ENSECAG00000015132, ENSECAG00000020259, ENSECAG00000018506, ENSECAG00000022357, ENSECAG00000031442, ENSECAG00000021088, ENSECAG00000011686, ENSECAG00000013999, ENSECAG00000018189, ENSECAG00000018005	BMP15, SMURF2, ACVR2A, SMAD6, SKOR1, RNF111, SDCBP, SMAD1, NGF, SMAD2, SMAD3, SMAD5, EIF4E1B, FGF16, GDF9, ACVR1B, TSPAN3, TWSG1, PMEPA1
GO:0071363_cellular_response_to_growth_factor_stimulus	0.359	0.121	0.184	0.184	ENSECAG00000023233, ENSECAG00000011935, ENSECAG00000000138, ENSECAG00000013706, ENSECAG00000036584, ENSECAG00000024602, ENSECAG00000015053, ENSECAG00000022649, ENSECAG00000010553, ENSECAG00000015132, ENSECAG00000020259, ENSECAG00000018506, ENSECAG00000022357, ENSECAG00000031442, ENSECAG00000021088, ENSECAG00000011686, ENSECAG00000013999, ENSECAG00000018189, ENSECAG00000018005	BMP15, SMURF2, ACVR2A, SMAD6, SKOR1, RNF111, SDCBP, SMAD1, NGF, SMAD2, SMAD3, SMAD5, EIF4E1B, FGF16, GDF9, ACVR1B, TSPAN3, TWSG1, PMEPA1
GO:0050770_regulation_of_axonogenesis	0.913	0.7	0.176	0.184	ENSECAG00000009111, ENSECAG00000010553, ENSECAG00000020281, ENSECAG00000017840, ENSECAG00000022329, ENSECAG00000032992	RUFY3, NGF, PAK2, PAK1, LRRC4C, TIAM1
GO:0097435_supramolecular_fiber_organization	0.667	0.701	0.168	0.184	ENSECAG00000017894, ENSECAG00000016155, ENSECAG00000032667, ENSECAG00000013629, ENSECAG00000009219, ENSECAG00000021225, ENSECAG00000024334, ENSECAG00000033791, ENSECAG00000018435, ENSECAG00000009003, ENSECAG00000011456, ENSECAG00000020276, ENSECAG00000000050, ENSECAG00000023019, ENSECAG00000009648, ENSECAG00000011991, ENSECAG00000020822, ENSECAG00000009190, ENSECAG00000021545, ENSECAG00000014408,…	CKAP2, KIF18A, INA, ADD3, ACTR2, MPRIP, CARMIL1, RHOA, WDR1, APC, ARPC2, HOOK3, WASF3, KIF18B, CLIP1, LIMA1, DIAPH1, TMSB4X, MTSS1, PLS1, TPM1, ACTR3, LMOD3, TPM3, ARPC3, MAP1S, CCDC88A, MYO5A, FHOD3, NCKAP5, ADD1, DIAPH3, ARFIP1, CCDC88C, BAIAP2L1, ARPC5L, SLAIN2, TPM4, MYO6, CSRP2, ARPIN, CFL2, SSH2, CEP192, TUBG1, ENAH, CAMSAP1, CFL1, ARHGAP18, CKAP5, PPP1R9B, TPM4, WASF1
GO:0022603_regulation_of_anatomical_structure_morphogenesis	1.07	0.488	0.168	0.184	ENSECAG00000022262, ENSECAG00000018333, ENSECAG00000007560, ENSECAG00000007187, ENSECAG00000009111, ENSECAG00000012900, ENSECAG00000011111, ENSECAG00000010553, ENSECAG00000020281, ENSECAG00000017840, ENSECAG00000004389, ENSECAG00000022329, ENSECAG00000000751, ENSECAG00000032992, ENSECAG00000032767, ENSECAG00000008137, ENSECAG00000002920	BRWD1, EZR, FXR1, BRWD3, RUFY3, MSN, FMNL2, NGF, PAK2, PAK1, MFF, LRRC4C, NEDD4L, TIAM1, FMR1, VANGL1, RDX
GO:0120036_plasma_membrane_bounded_cell_projection_organization	0.451	-0.124	0.152	0.184	ENSECAG00000019646, ENSECAG00000015360, ENSECAG00000019993, ENSECAG00000010951, ENSECAG00000015237, ENSECAG00000007560, ENSECAG00000023433, ENSECAG00000008104, ENSECAG00000023274, ENSECAG00000012044, ENSECAG00000006665, ENSECAG00000009111, ENSECAG00000011669, ENSECAG00000011655, ENSECAG00000022693, ENSECAG00000014459, ENSECAG00000014240, ENSECAG00000005815, ENSECAG00000022058, ENSECAG00000011438,…	AHI1, IFT122, KALRN, DNAAF4, PIBF1, FXR1, TMEM231, DYNLL1, LAMA5, PTPDC1, GPM6B, RUFY3, TNN, PCM1, SEPTIN7, ARL13B, IFT46, LLPH, ODF2L, IFT57, DRC1, NGF, PAK2, MANF, PAK1, RNF34, SPAG1, LRRC4C, ISL2, SCLT1, MAP4K4, TRAF3IP1, CEP89, NOTCH1, KIF5B, MAP1S, FRYL, ACTB, EPS8, NEDD4L, CEP20, IQCB1, OFD1, SEPTIN2, DTNBP1, BBS5, CENPJ, SMO, FAM161A, ODF2, IFT74, BBS7, RFFL, HYLS1, CEP41, LCA5, CCDC66, TI…
GO:0017148_negative_regulation_of_translation	0.142	-0.628	0.144	0.184	ENSECAG00000005798, ENSECAG00000001582, ENSECAG00000007560, ENSECAG00000019475, ENSECAG00000023108, ENSECAG00000024732, ENSECAG00000015551, ENSECAG00000023181, ENSECAG00000012606, ENSECAG00000016873, ENSECAG00000012956, ENSECAG00000009759, ENSECAG00000032767, ENSECAG00000016921, ENSECAG00000020605	CNOT7, CNOT6L, FXR1, YTHDF1, YTHDF2, EXOSC9, SAMD4B, CNOT3, EXOSC8, CPEB1, DCPS, TNRC6B, FMR1, CPEB4, TRIM2
GO:0034249_negative_regulation_of_cellular_amide_metabolic_process	0.142	-0.628	0.144	0.184	ENSECAG00000005798, ENSECAG00000001582, ENSECAG00000007560, ENSECAG00000019475, ENSECAG00000023108, ENSECAG00000024732, ENSECAG00000015551, ENSECAG00000023181, ENSECAG00000012606, ENSECAG00000016873, ENSECAG00000012956, ENSECAG00000009759, ENSECAG00000032767, ENSECAG00000016921, ENSECAG00000020605	CNOT7, CNOT6L, FXR1, YTHDF1, YTHDF2, EXOSC9, SAMD4B, CNOT3, EXOSC8, CPEB1, DCPS, TNRC6B, FMR1, CPEB4, TRIM2
GO:0040012_regulation_of_locomotion	0.412	0.363	0.2	0.192	ENSECAG00000011917, ENSECAG00000009190, ENSECAG00000011462, ENSECAG00000031442, ENSECAG00000011027, ENSECAG00000009655	DOCK8, TMSB4X, SRGAP1, FGF16, CFAP20, SINHCAF
GO:2000145_regulation_of_cell_motility	0.412	0.363	0.2	0.192	ENSECAG00000011917, ENSECAG00000009190, ENSECAG00000011462, ENSECAG00000031442, ENSECAG00000011027, ENSECAG00000009655	DOCK8, TMSB4X, SRGAP1, FGF16, CFAP20, SINHCAF
GO:0007005_mitochondrion_organization	0.583	0.571	0.192	0.192	ENSECAG00000012391, ENSECAG00000021929, ENSECAG00000019640, ENSECAG00000011409, ENSECAG00000017458, ENSECAG00000013971, ENSECAG00000022114, ENSECAG00000012452, ENSECAG00000011954, ENSECAG00000000965, ENSECAG00000009669, ENSECAG00000022600, ENSECAG00000004389, ENSECAG00000011752, ENSECAG00000020513, ENSECAG00000009478, ENSECAG00000005770, ENSECAG00000038834, ENSECAG00000001360, ENSECAG00000011681,…	ROMO1, DNM1L, TOMM20, TIMM44, BNIP3, ATG5, WIPI2, ATG12, ATG3, ATG2B, GRPEL1, SPAG1, MFF, ATG14, CEP89, RHOT1, BNIP3L, MTFR2, AIFM1, NDUFS5, PMPCB, MTFR1, MFN1, TMEM70
GO:0043242_negative_regulation_of_protein-containing_complex_disassembly	0.645	0.55	0.192	0.192	ENSECAG00000017894, ENSECAG00000013629, ENSECAG00000009003, ENSECAG00000020653, ENSECAG00000013136, ENSECAG00000017095	CKAP2, ADD3, APC, TMEM39A, ADD1, CAMSAP1
GO:0006325_chromatin_organization	0.581	0.477	0.192	0.192	ENSECAG00000012780, ENSECAG00000030438, ENSECAG00000023410, ENSECAG00000007524, ENSECAG00000001445, ENSECAG00000001042, ENSECAG00000025118, ENSECAG00000007955, ENSECAG00000015098, ENSECAG00000024685, ENSECAG00000014665, ENSECAG00000023585, ENSECAG00000012089, ENSECAG00000032705, ENSECAG00000018222, ENSECAG00000022565, ENSECAG00000022440, ENSECAG00000018926, ENSECAG00000015040, ENSECAG00000010736,…	CBX3, BRD4, UBN2, NPM3, CHD7, PHF1, TADA2A, HNRNPU, MORC3, NPM2, ASF1A, SATB1, BRD2, H1-3, KDM4A, ATF7IP2, HCFC1, CFDP1, NASP, RESF1, NPM1, BPTF, RUVBL1, HELLS, NAP1L1, BRDT, KDM5A, CHD8, CTCF, HP1BP3, SMARCA5, SPTY2D1, YEATS4, UBN1, KDM5B, CHD1, SUPT16H, TASOR, CHD4, MTF2, H1-4, CBX1, BRD3, CBX5, HCFC2
GO:0030261_chromosome_condensation	0.752	0.786	0.184	0.192	ENSECAG00000016925, ENSECAG00000016495, ENSECAG00000007470, ENSECAG00000032705, ENSECAG00000018370, ENSECAG00000009830, ENSECAG00000008634, ENSECAG00000029603	WAPL, NUSAP1, NCAPG, H1-3, NCAPD3, PHF13, NCAPH, H1-4
GO:0051716_cellular_response_to_stimulus	0.198	-0.186	0.184	0.192	ENSECAG00000012810, ENSECAG00000021147, ENSECAG00000011567, ENSECAG00000012967, ENSECAG00000013186, ENSECAG00000023233, ENSECAG00000017695, ENSECAG00000014979, ENSECAG00000024205, ENSECAG00000021358, ENSECAG00000010827, ENSECAG00000015499, ENSECAG00000020524, ENSECAG00000007240, ENSECAG00000019837, ENSECAG00000019993, ENSECAG00000014582, ENSECAG00000023670, ENSECAG00000011935, ENSECAG00000006638,…	TNKS2, ATM, UIMC1, PRKAA2, WWC3, BMP15, KIAA0586, AFAP1L2, HSPA5, SFRP1, TEX15, XPC, MRNIP, CYLD, PIK3R1, KALRN, UFL1, CUL4B, SMURF2, CASP8AP2, LAMTOR3, HEY2, PMS2, ARHGAP17, YWHAZ, FXR1, FAF2, PDE3B, AKAP13, CXCL10, PIK3CA, WAC, SYT11, PKN2, ZNRF3, ACVR2A, SLC39A10, HUS1, RIPK2, ROCK1, ADAM10, BNIP3, RAB13, SPRTN, MPG, ITGA1, LPIN2, AKT1, PLCB3, NIPBL, PDCD10, KLHL22, MSH3, CSNK1G2, APC, MLH3, B…
GO:0034248_regulation_of_cellular_amide_metabolic_process	0.684	-0.0488	0.136	0.192	ENSECAG00000005798, ENSECAG00000001582, ENSECAG00000007560, ENSECAG00000019475, ENSECAG00000023108, ENSECAG00000024732, ENSECAG00000015551, ENSECAG00000023181, ENSECAG00000012606, ENSECAG00000009512, ENSECAG00000016873, ENSECAG00000017141, ENSECAG00000012956, ENSECAG00000019133, ENSECAG00000009759, ENSECAG00000018495, ENSECAG00000017002, ENSECAG00000008744, ENSECAG00000020316, ENSECAG00000015245,…	CNOT7, CNOT6L, FXR1, YTHDF1, YTHDF2, EXOSC9, SAMD4B, CNOT3, EXOSC8, CNBP, CPEB1, UPF3A, DCPS, TIGAR, TNRC6B, SSB, LARP1, UHMK1, RPS9, PAIP1, FMR1, LARP1B, SECISBP2L, UPF3B, CPEB4, TRIM2
GO:0006997_nucleus_organization	-0.0317	-0.043	0.224	0.2	ENSECAG00000020144, ENSECAG00000006545, ENSECAG00000003968, ENSECAG00000025004, ENSECAG00000000797, ENSECAG00000000965, ENSECAG00000017201, ENSECAG00000000872	UBXN2A, NSFL1C, NUP35, NUP54, SUN2, ATG2B, SUN1, TOR1AIP1
GO:0006631_fatty_acid_metabolic_process	0.724	0.71	0.208	0.2	ENSECAG00000006280, ENSECAG00000023693, ENSECAG00000010524, ENSECAG00000023082, ENSECAG00000020652, ENSECAG00000012878, ENSECAG00000015121, ENSECAG00000008989, ENSECAG00000010765, ENSECAG00000013127	LPIN2, ECI1, DCAF5, HACD3, ECHDC1, PNPLA8, ACSF3, AUH, ACSL3, PTGES3
GO:0008219_cell_death	0.914	0.783	0.192	0.2	ENSECAG00000008992, ENSECAG00000015766, ENSECAG00000020286, ENSECAG00000007240, ENSECAG00000006638, ENSECAG00000019545, ENSECAG00000021929, ENSECAG00000031204, ENSECAG00000020071, ENSECAG00000016116, ENSECAG00000017458, ENSECAG00000009988, ENSECAG00000023937, ENSECAG00000008466, ENSECAG00000043283, ENSECAG00000010553, ENSECAG00000022379, ENSECAG00000016261, ENSECAG00000042372, ENSECAG00000014198,…	HYPK, SNCA, BIRC7, CYLD, CASP8AP2, BIRC6, DNM1L, PIM3, XIAP, USP36, BNIP3, FBXO11, GSDMB, BIRC5, AGR2, NGF, RNF34, UACA, PTMS, MTCH2, FANK1, HTRA2, ARMC10, TIGAR, SH3RF1, BNIP3L, BAG3, AIFM1, RFFL, BIRC3, SPATA2, ABL2, CASP7, CAAP1, BCL10, TAOK1, SIVA1, TCHP, EYA1, ABL1, GSK3B
GO:0033043_regulation_of_organelle_organization	0.84	0.567	0.192	0.2	ENSECAG00000017894, ENSECAG00000012810, ENSECAG00000013629, ENSECAG00000016925, ENSECAG00000018333, ENSECAG00000017234, ENSECAG00000010056, ENSECAG00000024334, ENSECAG00000018435, ENSECAG00000017911, ENSECAG00000009003, ENSECAG00000009730, ENSECAG00000007955, ENSECAG00000010222, ENSECAG00000023879, ENSECAG00000000050, ENSECAG00000005178, ENSECAG00000007006, ENSECAG00000003759, ENSECAG00000014542,…	CKAP2, TNKS2, ADD3, WAPL, EZR, ARHGAP17, C1H10orf90, CARMIL1, WDR1, PDCD10, APC, SAR1A, HNRNPU, MAPRE1, IQGAP1, WASF3, CCSAP, ANAPC1, TBC1D14, SPICE1, CEP120, CLIP1, MSN, ODF2L, TMSB4X, MTSS1, PAK1, BUB1B, ATF7IP2, MFF, MAPRE2, RESF1, TRAF3IP1, CDCA2, FBXO5, IQGAP2, MAP1S, ZWILCH, PHLDB2, RHOT1, SENP6, WEE2, TMEM39A, ODF2, ADD1, ARFIP1, BAIAP2L1, CEP295, BUB3, SLAIN2, POT1, ARPIN, TASOR, SSH2, TT…
GO:0019752_carboxylic_acid_metabolic_process	0.266	0.256	0.192	0.2	ENSECAG00000013424, ENSECAG00000000279, ENSECAG00000014964, ENSECAG00000011118, ENSECAG00000006280, ENSECAG00000016016, ENSECAG00000023693, ENSECAG00000010524, ENSECAG00000020854, ENSECAG00000010849, ENSECAG00000020890, ENSECAG00000023082, ENSECAG00000017251, ENSECAG00000020652, ENSECAG00000015690, ENSECAG00000001058, ENSECAG00000019133, ENSECAG00000015865, ENSECAG00000008963, ENSECAG00000012878,…	KARS1, FARS2, MRPL39, GATC, LPIN2, GNPDA2, ECI1, DCAF5, TARS1, MDH1, PM20D2, HACD3, PARK7, ECHDC1, SHMT1, SLC7A7, TIGAR, GLUL, LARS1, PNPLA8, POLG2, PKM, PSPH, FARSB, ACSF3, AUH, IARS2, DARS1, ACSL3, PTGES3, ODC1
GO:0007154_cell_communication	0.0525	-0.418	0.192	0.2	ENSECAG00000012810, ENSECAG00000021147, ENSECAG00000012967, ENSECAG00000015766, ENSECAG00000013186, ENSECAG00000023233, ENSECAG00000013384, ENSECAG00000017695, ENSECAG00000014979, ENSECAG00000024205, ENSECAG00000021358, ENSECAG00000020524, ENSECAG00000007240, ENSECAG00000019837, ENSECAG00000019993, ENSECAG00000011935, ENSECAG00000008013, ENSECAG00000006638, ENSECAG00000013569, ENSECAG00000038178,…	TNKS2, ATM, PRKAA2, SNCA, WWC3, BMP15, STX3, KIAA0586, AFAP1L2, HSPA5, SFRP1, MRNIP, CYLD, PIK3R1, KALRN, SMURF2, NMB, CASP8AP2, LAMTOR3, HEY2, ARHGAP17, YWHAZ, RIMS1, FXR1, PDE3B, AKAP13, CXCL10, PIK3CA, WAC, SYT11, PKN2, ZNRF3, ACVR2A, SLC39A10, HUS1, RIPK2, ROCK1, ADAM10, BNIP3, CACNA1E, ITGA1, AKT1, PLCB3, PDCD10, KLHL22, CSNK1G2, APC, SMAD6, ATG5, SLC17A6, KCMF1, RBPJ, MAPKAP1, GNAS, RANBP10…
GO:0031324_negative_regulation_of_cellular_metabolic_process	0.301	-0.42	0.176	0.2	ENSECAG00000005798, ENSECAG00000001582, ENSECAG00000011357, ENSECAG00000024605, ENSECAG00000012780, ENSECAG00000006101, ENSECAG00000028670, ENSECAG00000007560, ENSECAG00000019475, ENSECAG00000025040, ENSECAG00000019655, ENSECAG00000032622, ENSECAG00000023512, ENSECAG00000000178, ENSECAG00000007955, ENSECAG00000036584, ENSECAG00000023366, ENSECAG00000007205, ENSECAG00000006289, ENSECAG00000016028,…	CNOT7, CNOT6L, GATAD2B, SIN3A, CBX3, ZBTB39, DPPA3, FXR1, YTHDF1, ZCCHC17, SVBP, HMX1, MTA3, RUNX1T1, HNRNPU, SKOR1, SUDS3, ZBTB33, NCOR1, N4BP2L2, MIER1, ID3, THRA, DCAF5, YTHDF2, CIART, EXOSC9, SAP18, SAMD4B, BRMS1, H1-3, RNF34, ANGEL2, ZNF684, CNOT3, CGAS, PER2, EXOSC8, DNMT3A, GATAD2A, CPEB1, TIPIN, SMARCE1, ZNF830, NR1H2, CBFA2T2, SYNCRIP, PCGF1, DCPS, LDB1, CHD8, MTA2, TIGAR, SAP130, CTCF, …
GO:0034724_DNA_replication-independent_chromatin_organization	0.549	0.608	0.232	0.208	ENSECAG00000023410, ENSECAG00000014665, ENSECAG00000015040, ENSECAG00000019336, ENSECAG00000021686	UBN2, ASF1A, NASP, UBN1, SUPT16H
GO:1990778_protein_localization_to_cell_periphery	0.835	0.75	0.224	0.208	ENSECAG00000013384, ENSECAG00000020655, ENSECAG00000016551, ENSECAG00000014459, ENSECAG00000023865, ENSECAG00000019132, ENSECAG00000006321, ENSECAG00000022357, ENSECAG00000017462, ENSECAG00000019987, ENSECAG00000019039, ENSECAG00000014446, ENSECAG00000013999, ENSECAG00000009566	STX3, GOLGA7, RAB13, ARL13B, RAB11A, SLMAP, GOLPH3, EIF4E1B, TMEM150A, GRIPAP1, CNST, SPTBN1, TSPAN3, GOPC
GO:0006979_response_to_oxidative_stress	0.619	0.676	0.208	0.208	ENSECAG00000022520, ENSECAG00000014283, ENSECAG00000019408, ENSECAG00000015836, ENSECAG00000011541, ENSECAG00000008958, ENSECAG00000008678, ENSECAG00000005675	NDUFA6, NCOA7, CAT, NDUFA12, PRDX2, SOD1, PRDX1, NFE2L2
GO:0043244_regulation_of_protein-containing_complex_disassembly	0.557	0.451	0.208	0.208	ENSECAG00000017894, ENSECAG00000013629, ENSECAG00000018435, ENSECAG00000009003, ENSECAG00000000529, ENSECAG00000020653, ENSECAG00000013136, ENSECAG00000017095	CKAP2, ADD3, WDR1, APC, MAP1S, TMEM39A, ADD1, CAMSAP1
GO:0032008_positive_regulation_of_TOR_signaling	0.319	0.241	0.208	0.208	ENSECAG00000013569, ENSECAG00000005374, ENSECAG00000015363, ENSECAG00000005729, ENSECAG00000021821, ENSECAG00000006312	LAMTOR3, WAC, KLHL22, RRAGA, LAMTOR5, LAMTOR4
GO:0006487_protein_N-linked_glycosylation	0.369	0.405	0.2	0.208	ENSECAG00000022687, ENSECAG00000019492, ENSECAG00000003030, ENSECAG00000018381, ENSECAG00000008074, ENSECAG00000024941, ENSECAG00000019546	STT3A, MGAT5, RPN1, RPN2, MAGT1, ALG6, DDOST
GO:0001775_cell_activation	0.747	0.733	0.192	0.208	ENSECAG00000011917, ENSECAG00000010697, ENSECAG00000019961, ENSECAG00000023517, ENSECAG00000018810, ENSECAG00000012844, ENSECAG00000011541, ENSECAG00000002989, ENSECAG00000008678	DOCK8, ZP4, ZP2, CYRIB, HELLS, TICAM2, PRDX2, ZP1, PRDX1
GO:0031032_actomyosin_structure_organization	0.705	0.735	0.224	0.216	ENSECAG00000021002, ENSECAG00000033791, ENSECAG00000008709, ENSECAG00000021186, ENSECAG00000017881, ENSECAG00000015606	ROCK1, RHOA, LMOD3, FHOD3, CDC42BPA, CSRP2
GO:0000462_maturation_of_SSU-rRNA_from_tricistronic_rRNA_transcript_(SSU-rRNA,_5.8S_rRNA,_LSU-rRNA)	0.571	0.572	0.216	0.216	ENSECAG00000021443, ENSECAG00000005387, ENSECAG00000001358, ENSECAG00000004492, ENSECAG00000015089	HEATR1, UTP3, BMS1, RRS1, RPS8
GO:0006513_protein_monoubiquitination	0.608	0.523	0.216	0.216	ENSECAG00000005374, ENSECAG00000018149, ENSECAG00000017183, ENSECAG00000015363, ENSECAG00000017007, ENSECAG00000013193, ENSECAG00000011360, ENSECAG00000004655, ENSECAG00000010746, ENSECAG00000007453	WAC, RNF20, PCGF6, KLHL22, FANCL, UHRF1, PCGF1, TOPORS, RAD18, PCGF2
GO:0010629_negative_regulation_of_gene_expression	0.354	-0.216	0.2	0.216	ENSECAG00000005798, ENSECAG00000001582, ENSECAG00000018988, ENSECAG00000017022, ENSECAG00000011063, ENSECAG00000010812, ENSECAG00000007560, ENSECAG00000019475, ENSECAG00000007955, ENSECAG00000016506, ENSECAG00000023108, ENSECAG00000003869, ENSECAG00000024732, ENSECAG00000015551, ENSECAG00000010723, ENSECAG00000022565, ENSECAG00000023181, ENSECAG00000010736, ENSECAG00000012606, ENSECAG00000016873,…	CNOT7, CNOT6L, XRN2, UPF2, MOV10L1, EDC4, FXR1, YTHDF1, HNRNPU, PIWIL1, YTHDF2, ZC3H7A, EXOSC9, SAMD4B, ANGEL2, ATF7IP2, CNOT3, RESF1, EXOSC8, CPEB1, HELLS, SRRT, UPF3A, SYNCRIP, DCPS, TNRC6B, HELZ, CAST, FMR1, FASTKD2, TASOR, SMG7, UPF3B, CPEB4, TRIM2
GO:0007169_transmembrane_receptor_protein_tyrosine_kinase_signaling_pathway	0.988	0.752	0.176	0.216	ENSECAG00000014979, ENSECAG00000019837, ENSECAG00000021238, ENSECAG00000016346, ENSECAG00000010553, ENSECAG00000033344, ENSECAG00000015006, ENSECAG00000022357, ENSECAG00000031442, ENSECAG00000021241, ENSECAG00000013999, ENSECAG00000012962, ENSECAG00000024246, ENSECAG00000024935, ENSECAG00000014300	AFAP1L2, PIK3R1, IGF1R, LEPROT, NGF, PIK3R3, FGFR1, EIF4E1B, FGF16, CPNE3, TSPAN3, SAMD12, GIGYF2, GSK3B, CBLB
GO:0031400_negative_regulation_of_protein_modification_process	-0.052	-0.219	0.248	0.224	ENSECAG00000019655, ENSECAG00000012588, ENSECAG00000017165, ENSECAG00000024842, ENSECAG00000033949, ENSECAG00000018005, ENSECAG00000014300	SVBP, DTNBP1, ENSA, SH3BP5, OTUB1, PMEPA1, CBLB
GO:0019932_second-messenger-mediated_signaling	0.0141	0.0788	0.232	0.224	ENSECAG00000024797, ENSECAG00000024243, ENSECAG00000020134, ENSECAG00000010136, ENSECAG00000024658, ENSECAG00000011107	PDE3B, GNAS, RCAN3, PPP3CA, CAP1, PPP1R9B
GO:0006897_endocytosis	-0.0159	0.0229	0.232	0.224	ENSECAG00000005207, ENSECAG00000015766, ENSECAG00000020824, ENSECAG00000015853, ENSECAG00000014371, ENSECAG00000012054, ENSECAG00000016188, ENSECAG00000020425, ENSECAG00000019264, ENSECAG00000019198, ENSECAG00000007262, ENSECAG00000022080, ENSECAG00000014737, ENSECAG00000007134, ENSECAG00000007129, ENSECAG00000022623, ENSECAG00000024053, ENSECAG00000013583, ENSECAG00000021422, ENSECAG00000009181,…	RAB4A, SNCA, EPS15, SORT1, CSNK1G2, ITSN1, REPS1, ITSN2, PICALM, CSNK1G3, EEA1, LAMTOR1, HEATR5B, AP2A1, LRP6, SNX9, MYO6, CD320, DNAJC13, CLINT1, CLTC
GO:0010324_membrane_invagination	-0.0159	0.0229	0.232	0.224	ENSECAG00000005207, ENSECAG00000015766, ENSECAG00000020824, ENSECAG00000015853, ENSECAG00000014371, ENSECAG00000012054, ENSECAG00000016188, ENSECAG00000020425, ENSECAG00000019264, ENSECAG00000019198, ENSECAG00000007262, ENSECAG00000022080, ENSECAG00000014737, ENSECAG00000007134, ENSECAG00000007129, ENSECAG00000022623, ENSECAG00000024053, ENSECAG00000013583, ENSECAG00000021422, ENSECAG00000009181,…	RAB4A, SNCA, EPS15, SORT1, CSNK1G2, ITSN1, REPS1, ITSN2, PICALM, CSNK1G3, EEA1, LAMTOR1, HEATR5B, AP2A1, LRP6, SNX9, MYO6, CD320, DNAJC13, CLINT1, CLTC
GO:0000003_reproduction	0.729	0.675	0.208	0.224	ENSECAG00000010827, ENSECAG00000016913, ENSECAG00000009163, ENSECAG00000013845, ENSECAG00000010697, ENSECAG00000024392, ENSECAG00000021504, ENSECAG00000017824, ENSECAG00000019961, ENSECAG00000009943, ENSECAG00000017037, ENSECAG00000016392, ENSECAG00000022013, ENSECAG00000021452, ENSECAG00000010922, ENSECAG00000009748, ENSECAG00000020362, ENSECAG00000011630, ENSECAG00000021800, ENSECAG00000018370,…	TEX15, MEIKIN, NUF2, HUS1, ZP4, BRIP1, SPATA22, TERB1, ZP2, RTF2, TDRD5, RAD21, IFTAP, BUB1B, RAD50, TDRD1, MND1, FBXO5, WEE2, NCAPD3, CDC25C, ZP1, IZUMO1R, ESPL1, BCL2L11, CENPC, TTK, TOP2A, TUBG1, BUB1
GO:0022414_reproductive_process	0.729	0.675	0.208	0.224	ENSECAG00000010827, ENSECAG00000016913, ENSECAG00000009163, ENSECAG00000013845, ENSECAG00000010697, ENSECAG00000024392, ENSECAG00000021504, ENSECAG00000017824, ENSECAG00000019961, ENSECAG00000009943, ENSECAG00000017037, ENSECAG00000016392, ENSECAG00000022013, ENSECAG00000021452, ENSECAG00000010922, ENSECAG00000009748, ENSECAG00000020362, ENSECAG00000011630, ENSECAG00000021800, ENSECAG00000018370,…	TEX15, MEIKIN, NUF2, HUS1, ZP4, BRIP1, SPATA22, TERB1, ZP2, RTF2, TDRD5, RAD21, IFTAP, BUB1B, RAD50, TDRD1, MND1, FBXO5, WEE2, NCAPD3, CDC25C, ZP1, IZUMO1R, ESPL1, BCL2L11, CENPC, TTK, TOP2A, TUBG1, BUB1
GO:0030030_cell_projection_organization	0.37	-0.202	0.2	0.224	ENSECAG00000019646, ENSECAG00000015360, ENSECAG00000019993, ENSECAG00000010951, ENSECAG00000015237, ENSECAG00000007560, ENSECAG00000023433, ENSECAG00000008104, ENSECAG00000023274, ENSECAG00000012044, ENSECAG00000006665, ENSECAG00000009111, ENSECAG00000011669, ENSECAG00000011655, ENSECAG00000022693, ENSECAG00000014459, ENSECAG00000014240, ENSECAG00000005815, ENSECAG00000022058, ENSECAG00000011438,…	AHI1, IFT122, KALRN, DNAAF4, PIBF1, FXR1, TMEM231, DYNLL1, LAMA5, PTPDC1, GPM6B, RUFY3, TNN, PCM1, SEPTIN7, ARL13B, IFT46, LLPH, ODF2L, IFT57, DRC1, NGF, PAK2, MTSS1, MANF, PAK1, RNF34, SPAG1, LRRC4C, ISL2, SCLT1, MAP4K4, TRAF3IP1, CEP89, NOTCH1, KIF5B, MAP1S, FRYL, ACTB, EPS8, NEDD4L, CEP20, IQCB1, OFD1, SEPTIN2, DTNBP1, BBS5, CENPJ, SMO, FAM161A, ODF2, IFT74, BBS7, RFFL, HYLS1, CEP41, LCA5, CCD…
GO:0040011_locomotion	0.258	0.23	0.248	0.232	ENSECAG00000013186, ENSECAG00000019993, ENSECAG00000013300, ENSECAG00000015019, ENSECAG00000024334, ENSECAG00000023274, ENSECAG00000033791, ENSECAG00000011917, ENSECAG00000009003, ENSECAG00000008303, ENSECAG00000014081, ENSECAG00000011111, ENSECAG00000020710, ENSECAG00000009190, ENSECAG00000011462, ENSECAG00000022405, ENSECAG00000000558, ENSECAG00000015935, ENSECAG00000031442, ENSECAG00000019637,…	WWC3, KALRN, CXCL10, PIK3CA, CARMIL1, LAMA5, RHOA, DOCK8, APC, LAMB1, WWC1, FMNL2, DRC1, TMSB4X, SRGAP1, NOTCH1, KIF5B, ACTB, FGF16, LGALS12, ITGB1, WWC2, SMO, USP9X, ARPC5L, CTNNA1, ACTB, CFAP20, CFL2, SDC2, ENAH, CFL1, MACO1, VAV3, SINHCAF, EFHC1
GO:0007099_centriole_replication	0.619	0.602	0.24	0.232	ENSECAG00000010318, ENSECAG00000010056, ENSECAG00000000796, ENSECAG00000014542, ENSECAG00000021916, ENSECAG00000006526, ENSECAG00000018114, ENSECAG00000023113, ENSECAG00000008051	CEP63, C1H10orf90, CETN2, SPICE1, CEP120, CENPJ, CEP295, SASS6, CEP192
GO:1901135_carbohydrate_derivative_metabolic_process	0.124	0.0527	0.24	0.232	ENSECAG00000022687, ENSECAG00000024684, ENSECAG00000029282, ENSECAG00000021725, ENSECAG00000016016, ENSECAG00000019492, ENSECAG00000007464, ENSECAG00000023746, ENSECAG00000023269, ENSECAG00000003030, ENSECAG00000018381, ENSECAG00000022081, ENSECAG00000011754, ENSECAG00000021678, ENSECAG00000035324, ENSECAG00000011390, ENSECAG00000017534, ENSECAG00000008074, ENSECAG00000012512, ENSECAG00000008959,…	STT3A, ATP5F1C, UQCRQ, TFDP2, GNPDA2, MGAT5, RRM2, NECAB2, GMPS, RPN1, RPN2, PARG, RPIA, PAPSS1, HAS3, GNPTG, HPRT1, MAGT1, COX6A1, SAMHD1, UMPS, ALG6, DPY19L3, GUCY2C, MAN1A2, TIGAR, SERP1, UQCRB, COX4I1, RRM1, NUDT5, NUDT4, PKM, CSGALNACT2, ATP5F1E, TYMS, PANK3, NDUFB6, COX5B, NDUFS6, FAR1, ACSL3, DDOST, SUCLA2, ACOT9, HAS2
GO:0050821_protein_stabilization	0.7	0.812	0.232	0.232	ENSECAG00000008992, ENSECAG00000000269, ENSECAG00000012999, ENSECAG00000008511, ENSECAG00000008511, ENSECAG00000005267, ENSECAG00000018948, ENSECAG00000010407	HYPK, CDC37L1, SUGT1, HSP90AB1, HSP90AB1, BAG3, HSP90AA1, BAG4
GO:0007165_signal_transduction	-0.0496	-0.39	0.232	0.232	ENSECAG00000012810, ENSECAG00000021147, ENSECAG00000012967, ENSECAG00000013186, ENSECAG00000023233, ENSECAG00000017695, ENSECAG00000014979, ENSECAG00000024205, ENSECAG00000021358, ENSECAG00000020524, ENSECAG00000007240, ENSECAG00000019837, ENSECAG00000019993, ENSECAG00000011935, ENSECAG00000006638, ENSECAG00000013569, ENSECAG00000038178, ENSECAG00000017234, ENSECAG00000021882, ENSECAG00000024797,…	TNKS2, ATM, PRKAA2, WWC3, BMP15, KIAA0586, AFAP1L2, HSPA5, SFRP1, MRNIP, CYLD, PIK3R1, KALRN, SMURF2, CASP8AP2, LAMTOR3, HEY2, ARHGAP17, YWHAZ, PDE3B, AKAP13, CXCL10, PIK3CA, WAC, PKN2, ZNRF3, ACVR2A, SLC39A10, HUS1, RIPK2, ROCK1, ADAM10, BNIP3, ITGA1, AKT1, PLCB3, PDCD10, KLHL22, CSNK1G2, APC, SMAD6, RBPJ, MAPKAP1, GNAS, RANBP10, SKOR1, RNF111, LURAP1L, IGF1R, KCTD13, RCAN3, LEPROT, THRA, CSNK1A…
GO:0000245_spliceosomal_complex_assembly	0.673	0.703	0.224	0.232	ENSECAG00000022215, ENSECAG00000026848, ENSECAG00000023851, ENSECAG00000023932, ENSECAG00000007657, ENSECAG00000006649, ENSECAG00000007741, ENSECAG00000014213, ENSECAG00000010375, ENSECAG00000021657, ENSECAG00000012760	CRNKL1, SNRPC, SCAF11, SRSF6, SFSWAP, CELF2, CELF1, SRPK1, SRPK2, SF3B1, LUC7L3
GO:0031647_regulation_of_protein_stability	0.745	0.861	0.216	0.232	ENSECAG00000008992, ENSECAG00000000269, ENSECAG00000012999, ENSECAG00000008511, ENSECAG00000009628, ENSECAG00000008511, ENSECAG00000005267, ENSECAG00000018948, ENSECAG00000010407	HYPK, CDC37L1, SUGT1, HSP90AB1, USP7, HSP90AB1, BAG3, HSP90AA1, BAG4
GO:0006417_regulation_of_translation	0.472	-0.236	0.208	0.232	ENSECAG00000005798, ENSECAG00000001582, ENSECAG00000007560, ENSECAG00000019475, ENSECAG00000023108, ENSECAG00000024732, ENSECAG00000015551, ENSECAG00000023181, ENSECAG00000012606, ENSECAG00000009512, ENSECAG00000016873, ENSECAG00000017141, ENSECAG00000012956, ENSECAG00000009759, ENSECAG00000018495, ENSECAG00000017002, ENSECAG00000008744, ENSECAG00000020316, ENSECAG00000015245, ENSECAG00000032767,…	CNOT7, CNOT6L, FXR1, YTHDF1, YTHDF2, EXOSC9, SAMD4B, CNOT3, EXOSC8, CNBP, CPEB1, UPF3A, DCPS, TNRC6B, SSB, LARP1, UHMK1, RPS9, PAIP1, FMR1, LARP1B, SECISBP2L, UPF3B, CPEB4, TRIM2
GO:0006275_regulation_of_DNA_replication	0.565	0.43	0.248	0.24	ENSECAG00000024685, ENSECAG00000004590, ENSECAG00000003872, ENSECAG00000021453, ENSECAG00000009760, ENSECAG00000014613	NPM2, TIPIN, ZNF830, TICRR, GMNN, DBF4
GO:0030031_cell_projection_assembly	0.519	-0.0193	0.168	0.24	ENSECAG00000019646, ENSECAG00000015360, ENSECAG00000010951, ENSECAG00000015237, ENSECAG00000007560, ENSECAG00000023433, ENSECAG00000008104, ENSECAG00000012044, ENSECAG00000011655, ENSECAG00000022693, ENSECAG00000014459, ENSECAG00000014240, ENSECAG00000022058, ENSECAG00000011438, ENSECAG00000020710, ENSECAG00000021545, ENSECAG00000022379, ENSECAG00000022600, ENSECAG00000024050, ENSECAG00000009886,…	AHI1, IFT122, DNAAF4, PIBF1, FXR1, TMEM231, DYNLL1, PTPDC1, PCM1, SEPTIN7, ARL13B, IFT46, ODF2L, IFT57, DRC1, MTSS1, RNF34, SPAG1, SCLT1, TRAF3IP1, CEP89, EPS8, CEP20, IQCB1, OFD1, SEPTIN2, BBS5, CENPJ, ODF2, IFT74, BBS7, RFFL, HYLS1, CEP41, CCDC66, FMR1, CFAP20, TAOK1, IFT88, FBXW8, ENTR1
GO:1901605_alpha-amino_acid_metabolic_process	-0.129	-0.0916	0.256	0.248	ENSECAG00000015690, ENSECAG00000001058, ENSECAG00000015865, ENSECAG00000020880, ENSECAG00000022690	SHMT1, SLC7A7, GLUL, PSPH, ODC1
GO:1901991_negative_regulation_of_mitotic_cell_cycle_phase_transition	0.779	0.535	0.248	0.248	ENSECAG00000020524, ENSECAG00000014575, ENSECAG00000013845, ENSECAG00000018235, ENSECAG00000009913, ENSECAG00000021452, ENSECAG00000003872, ENSECAG00000018367, ENSECAG00000021453, ENSECAG00000010047, ENSECAG00000023776, ENSECAG00000017103	MRNIP, RB1, HUS1, AVEN, CDC6, BUB1B, ZNF830, ZWILCH, TICRR, BUB3, TTK, BUB1
GO:0051254_positive_regulation_of_RNA_metabolic_process	0.117	-0.409	0.224	0.248	ENSECAG00000024766, ENSECAG00000005798, ENSECAG00000014979, ENSECAG00000001582, ENSECAG00000022110, ENSECAG00000005699, ENSECAG00000030438, ENSECAG00000021443, ENSECAG00000014570, ENSECAG00000019475, ENSECAG00000011391, ENSECAG00000006280, ENSECAG00000022369, ENSECAG00000021380, ENSECAG00000007955, ENSECAG00000024602, ENSECAG00000000193, ENSECAG00000024187, ENSECAG00000008412, ENSECAG00000011120,…	CREBBP, CNOT7, AFAP1L2, CNOT6L, ASXL1, SERTAD3, BRD4, HEATR1, CDK7, YTHDF1, TET3, LPIN2, WBP2, RBMX, HNRNPU, RNF111, SSBP3, SMARCA2, ICE2, THRA, LEO1, YTHDF2, EXOSC9, MTF1, DYRK1A, SAMD4B, NUP85, TCEA1, EDRF1, LMO3, PTOV1, MED10, ELL, ISL2, CNOT3, PTMS, NPM1, EXOSC8, MED30, MED25, MYBL1, NCOA6, KMT2B, NR1H2, BRDT, AKIRIN2, DCPS, LDB1, THRAP3, ARID1A, CTCF, ING1, TNRC6B, NCOA1, SREBF2, ATAD2, KMT2…
GO:0051129_negative_regulation_of_cellular_component_organization	0.32	0.0692	0.304	0.256	ENSECAG00000017894, ENSECAG00000013629, ENSECAG00000009003, ENSECAG00000007955, ENSECAG00000022058, ENSECAG00000009190, ENSECAG00000021452, ENSECAG00000011630, ENSECAG00000018367, ENSECAG00000020653, ENSECAG00000036783, ENSECAG00000013136, ENSECAG00000010047, ENSECAG00000023388, ENSECAG00000015172, ENSECAG00000023776, ENSECAG00000017095, ENSECAG00000018005, ENSECAG00000017103	CKAP2, ADD3, APC, HNRNPU, ODF2L, TMSB4X, BUB1B, FBXO5, ZWILCH, TMEM39A, SVIP, ADD1, BUB3, ARPIN, SSH2, TTK, CAMSAP1, PMEPA1, BUB1
GO:0016477_cell_migration	0.418	0.429	0.28	0.256	ENSECAG00000013186, ENSECAG00000013300, ENSECAG00000015019, ENSECAG00000024334, ENSECAG00000033791, ENSECAG00000011917, ENSECAG00000009003, ENSECAG00000008303, ENSECAG00000014081, ENSECAG00000011111, ENSECAG00000009190, ENSECAG00000011462, ENSECAG00000031442, ENSECAG00000019637, ENSECAG00000022498, ENSECAG00000017226, ENSECAG00000005549, ENSECAG00000009791, ENSECAG00000023991, ENSECAG00000008484,…	WWC3, CXCL10, PIK3CA, CARMIL1, RHOA, DOCK8, APC, LAMB1, WWC1, FMNL2, TMSB4X, SRGAP1, FGF16, LGALS12, ITGB1, WWC2, USP9X, ARPC5L, CTNNA1, SDC2, VAV3, SINHCAF
GO:0006301_postreplication_repair	0.861	0.902	0.256	0.256	ENSECAG00000020522, ENSECAG00000007804, ENSECAG00000010746, ENSECAG00000022502, ENSECAG00000019597	PRIMPOL, REV1, RAD18, REV3L, UBE2N
GO:0006260_DNA_replication	0.444	0.404	0.256	0.256	ENSECAG00000021720, ENSECAG00000020522, ENSECAG00000024685, ENSECAG00000013162, ENSECAG00000009943, ENSECAG00000007182, ENSECAG00000024473, ENSECAG00000008840, ENSECAG00000014368, ENSECAG00000013090, ENSECAG00000007885, ENSECAG00000013129, ENSECAG00000019631, ENSECAG00000022599, ENSECAG00000004590, ENSECAG00000003872, ENSECAG00000021453, ENSECAG00000009760, ENSECAG00000014613, ENSECAG00000015297,…	NOC3L, PRIMPOL, NPM2, PCNA, RTF2, ORC6, MCM10, MCM6, MCM5, POLA1, ORC5, TOP1MT, MCM2, RFC4, TIPIN, ZNF830, TICRR, GMNN, DBF4, PRIM1, TOP1, POLD3, RFC3
GO:0048870_cell_motility	0.428	0.387	0.24	0.256	ENSECAG00000013186, ENSECAG00000013300, ENSECAG00000015019, ENSECAG00000024334, ENSECAG00000033791, ENSECAG00000011917, ENSECAG00000009003, ENSECAG00000008303, ENSECAG00000014081, ENSECAG00000011111, ENSECAG00000020710, ENSECAG00000009190, ENSECAG00000011462, ENSECAG00000015935, ENSECAG00000031442, ENSECAG00000019637, ENSECAG00000022498, ENSECAG00000017226, ENSECAG00000005549, ENSECAG00000009791,…	WWC3, CXCL10, PIK3CA, CARMIL1, RHOA, DOCK8, APC, LAMB1, WWC1, FMNL2, DRC1, TMSB4X, SRGAP1, ACTB, FGF16, LGALS12, ITGB1, WWC2, USP9X, ARPC5L, CTNNA1, ACTB, CFAP20, CFL2, SDC2, ENAH, CFL1, VAV3, SINHCAF, EFHC1
GO:0051674_localization_of_cell	0.428	0.387	0.24	0.256	ENSECAG00000013186, ENSECAG00000013300, ENSECAG00000015019, ENSECAG00000024334, ENSECAG00000033791, ENSECAG00000011917, ENSECAG00000009003, ENSECAG00000008303, ENSECAG00000014081, ENSECAG00000011111, ENSECAG00000020710, ENSECAG00000009190, ENSECAG00000011462, ENSECAG00000015935, ENSECAG00000031442, ENSECAG00000019637, ENSECAG00000022498, ENSECAG00000017226, ENSECAG00000005549, ENSECAG00000009791,…	WWC3, CXCL10, PIK3CA, CARMIL1, RHOA, DOCK8, APC, LAMB1, WWC1, FMNL2, DRC1, TMSB4X, SRGAP1, ACTB, FGF16, LGALS12, ITGB1, WWC2, USP9X, ARPC5L, CTNNA1, ACTB, CFAP20, CFL2, SDC2, ENAH, CFL1, VAV3, SINHCAF, EFHC1
GO:0023052_signaling	-0.101	-0.562	0.24	0.256	ENSECAG00000012810, ENSECAG00000021147, ENSECAG00000012967, ENSECAG00000015766, ENSECAG00000013186, ENSECAG00000023233, ENSECAG00000013384, ENSECAG00000017695, ENSECAG00000014979, ENSECAG00000024205, ENSECAG00000021358, ENSECAG00000020524, ENSECAG00000007240, ENSECAG00000019837, ENSECAG00000019993, ENSECAG00000011935, ENSECAG00000008013, ENSECAG00000006638, ENSECAG00000013569, ENSECAG00000038178,…	TNKS2, ATM, PRKAA2, SNCA, WWC3, BMP15, STX3, KIAA0586, AFAP1L2, HSPA5, SFRP1, MRNIP, CYLD, PIK3R1, KALRN, SMURF2, NMB, CASP8AP2, LAMTOR3, HEY2, ARHGAP17, YWHAZ, RIMS1, FXR1, PDE3B, AKAP13, CXCL10, PIK3CA, WAC, SYT11, PKN2, ZNRF3, ACVR2A, SLC39A10, HUS1, RIPK2, ROCK1, ADAM10, BNIP3, CACNA1E, ITGA1, AKT1, PLCB3, PDCD10, KLHL22, CSNK1G2, APC, SMAD6, SLC17A6, KCMF1, RBPJ, MAPKAP1, GNAS, RANBP10, SKOR…
GO:0071900_regulation_of_protein_serine/threonine_kinase_activity	0.439	0.256	0.232	0.256	ENSECAG00000021289, ENSECAG00000017911, ENSECAG00000016020, ENSECAG00000016023, ENSECAG00000020270, ENSECAG00000019369, ENSECAG00000008787, ENSECAG00000014813, ENSECAG00000020161, ENSECAG00000010405, ENSECAG00000001853, ENSECAG00000015806, ENSECAG00000014113, ENSECAG00000023790	CCNE1, PDCD10, CCNJ, CCNO, CCNE2, CCNF, CCNB3, CCNB2, CCNI, TRIB2, CCNH, CCNB1, CCNG2, MNAT1
GO:0032990_cell_part_morphogenesis	0.503	-0.0784	0.224	0.256	ENSECAG00000019993, ENSECAG00000007560, ENSECAG00000023274, ENSECAG00000009111, ENSECAG00000011669, ENSECAG00000005815, ENSECAG00000010553, ENSECAG00000020281, ENSECAG00000017840, ENSECAG00000022329, ENSECAG00000009523, ENSECAG00000008730, ENSECAG00000022405, ENSECAG00000000558, ENSECAG00000000529, ENSECAG00000015935, ENSECAG00000000751, ENSECAG00000004904, ENSECAG00000032992, ENSECAG00000015935,…	KALRN, FXR1, LAMA5, RUFY3, TNN, LLPH, NGF, PAK2, PAK1, LRRC4C, ISL2, MAP4K4, NOTCH1, KIF5B, MAP1S, ACTB, NEDD4L, SMO, TIAM1, ACTB, FMR1, ENAH, TAOK3
GO:0048812_neuron_projection_morphogenesis	0.503	-0.0784	0.224	0.256	ENSECAG00000019993, ENSECAG00000007560, ENSECAG00000023274, ENSECAG00000009111, ENSECAG00000011669, ENSECAG00000005815, ENSECAG00000010553, ENSECAG00000020281, ENSECAG00000017840, ENSECAG00000022329, ENSECAG00000009523, ENSECAG00000008730, ENSECAG00000022405, ENSECAG00000000558, ENSECAG00000000529, ENSECAG00000015935, ENSECAG00000000751, ENSECAG00000004904, ENSECAG00000032992, ENSECAG00000015935,…	KALRN, FXR1, LAMA5, RUFY3, TNN, LLPH, NGF, PAK2, PAK1, LRRC4C, ISL2, MAP4K4, NOTCH1, KIF5B, MAP1S, ACTB, NEDD4L, SMO, TIAM1, ACTB, FMR1, ENAH, TAOK3
GO:0048858_cell_projection_morphogenesis	0.503	-0.0784	0.224	0.256	ENSECAG00000019993, ENSECAG00000007560, ENSECAG00000023274, ENSECAG00000009111, ENSECAG00000011669, ENSECAG00000005815, ENSECAG00000010553, ENSECAG00000020281, ENSECAG00000017840, ENSECAG00000022329, ENSECAG00000009523, ENSECAG00000008730, ENSECAG00000022405, ENSECAG00000000558, ENSECAG00000000529, ENSECAG00000015935, ENSECAG00000000751, ENSECAG00000004904, ENSECAG00000032992, ENSECAG00000015935,…	KALRN, FXR1, LAMA5, RUFY3, TNN, LLPH, NGF, PAK2, PAK1, LRRC4C, ISL2, MAP4K4, NOTCH1, KIF5B, MAP1S, ACTB, NEDD4L, SMO, TIAM1, ACTB, FMR1, ENAH, TAOK3
GO:0120039_plasma_membrane_bounded_cell_projection_morphogenesis	0.503	-0.0784	0.224	0.256	ENSECAG00000019993, ENSECAG00000007560, ENSECAG00000023274, ENSECAG00000009111, ENSECAG00000011669, ENSECAG00000005815, ENSECAG00000010553, ENSECAG00000020281, ENSECAG00000017840, ENSECAG00000022329, ENSECAG00000009523, ENSECAG00000008730, ENSECAG00000022405, ENSECAG00000000558, ENSECAG00000000529, ENSECAG00000015935, ENSECAG00000000751, ENSECAG00000004904, ENSECAG00000032992, ENSECAG00000015935,…	KALRN, FXR1, LAMA5, RUFY3, TNN, LLPH, NGF, PAK2, PAK1, LRRC4C, ISL2, MAP4K4, NOTCH1, KIF5B, MAP1S, ACTB, NEDD4L, SMO, TIAM1, ACTB, FMR1, ENAH, TAOK3
GO:0045165_cell_fate_commitment	0.207	0.096	0.304	0.264	ENSECAG00000009003, ENSECAG00000009943, ENSECAG00000010880, ENSECAG00000015423, ENSECAG00000009523	APC, RTF2, SOX6, PRDM4, ISL2
GO:0006091_generation_of_precursor_metabolites_and_energy	-0.0996	-0.207	0.28	0.264	ENSECAG00000011728, ENSECAG00000029282, ENSECAG00000016568, ENSECAG00000010849, ENSECAG00000011754, ENSECAG00000013738, ENSECAG00000012512, ENSECAG00000019133, ENSECAG00000009780, ENSECAG00000011722, ENSECAG00000038834, ENSECAG00000007644, ENSECAG00000011808, ENSECAG00000025162, ENSECAG00000028274, ENSECAG00000018466, ENSECAG00000007968, ENSECAG00000021690, ENSECAG00000011122	PYGL, UQCRQ, CS, MDH1, RPIA, SLC25A13, COX6A1, TIGAR, UQCRB, COX4I1, MTFR2, PKM, SLC25A22, ATP5F1E, NDUFB6, MTFR1, COX5B, NDUFS6, SUCLA2
GO:0042274_ribosomal_small_subunit_biogenesis	0.465	0.446	0.272	0.264	ENSECAG00000021443, ENSECAG00000005387, ENSECAG00000009738, ENSECAG00000020253, ENSECAG00000007602, ENSECAG00000001358, ENSECAG00000021950, ENSECAG00000013062, ENSECAG00000004492, ENSECAG00000012286, ENSECAG00000008252, ENSECAG00000013062, ENSECAG00000015089	HEATR1, UTP3, RPS19, RPS7, LTV1, BMS1, NPM1, RPSA, RRS1, DDX52, NOL11, RPSA, RPS8
GO:0000082_G1/S_transition_of_mitotic_cell_cycle	0.289	0.25	0.272	0.264	ENSECAG00000021289, ENSECAG00000014575, ENSECAG00000020270, ENSECAG00000021177, ENSECAG00000025015, ENSECAG00000000235	CCNE1, RB1, CCNE2, CDK2, CDK4, MTBP
GO:0044843_cell_cycle_G1/S_phase_transition	0.289	0.25	0.272	0.264	ENSECAG00000021289, ENSECAG00000014575, ENSECAG00000020270, ENSECAG00000021177, ENSECAG00000025015, ENSECAG00000000235	CCNE1, RB1, CCNE2, CDK2, CDK4, MTBP
GO:0048285_organelle_fission	0.673	0.556	0.264	0.264	ENSECAG00000021289, ENSECAG00000016155, ENSECAG00000023961, ENSECAG00000014979, ENSECAG00000000354, ENSECAG00000010827, ENSECAG00000020524, ENSECAG00000007240, ENSECAG00000014631, ENSECAG00000016913, ENSECAG00000020174, ENSECAG00000021929, ENSECAG00000031204, ENSECAG00000012899, ENSECAG00000014575, ENSECAG00000009163, ENSECAG00000006607, ENSECAG00000013845, ENSECAG00000021002, ENSECAG00000016495,…	CCNE1, KIF18A, AURKA, AFAP1L2, PLK2, TEX15, MRNIP, CYLD, TUBAL3, MEIKIN, CENPW, DNM1L, PIM3, ESCO2, RB1, NUF2, KIF11, HUS1, ROCK1, NUSAP1, NIPBL, PRC1, AVEN, CCNJ, BRIP1, SPATA22, CLASP1, HNRNPU, DSCC1, TERB1, CCNO, CCSAP, KIF18B, TUBA1C, ANAPC1, CETN2, MAP9, SPICE1, CCNE2, INSC, TUBE1, NCAPG, CDC6, STIL, IRAK2, RAD21, MCM6, CCNF, BUB1B, POLA1, RAD50, MFF, KIF4A, CCNB3, DCTN6, MND1, CCNB2, WRAP73…
GO:0042326_negative_regulation_of_phosphorylation	0.347	0.124	0.264	0.264	ENSECAG00000019133, ENSECAG00000012588, ENSECAG00000024842, ENSECAG00000018005, ENSECAG00000014300	TIGAR, DTNBP1, SH3BP5, PMEPA1, CBLB
GO:0051321_meiotic_cell_cycle	0.748	0.64	0.248	0.264	ENSECAG00000010827, ENSECAG00000016913, ENSECAG00000009163, ENSECAG00000013845, ENSECAG00000024392, ENSECAG00000021504, ENSECAG00000017824, ENSECAG00000016392, ENSECAG00000021452, ENSECAG00000010922, ENSECAG00000020362, ENSECAG00000011630, ENSECAG00000021800, ENSECAG00000018370, ENSECAG00000003029, ENSECAG00000022722, ENSECAG00000032970, ENSECAG00000018267, ENSECAG00000023776, ENSECAG00000013053,…	TEX15, MEIKIN, NUF2, HUS1, BRIP1, SPATA22, TERB1, RAD21, BUB1B, RAD50, MND1, FBXO5, WEE2, NCAPD3, CDC25C, ESPL1, BCL2L11, CENPC, TTK, TOP2A, TUBG1, BUB1
GO:0140013_meiotic_nuclear_division	0.748	0.64	0.248	0.264	ENSECAG00000010827, ENSECAG00000016913, ENSECAG00000009163, ENSECAG00000013845, ENSECAG00000024392, ENSECAG00000021504, ENSECAG00000017824, ENSECAG00000016392, ENSECAG00000021452, ENSECAG00000010922, ENSECAG00000020362, ENSECAG00000011630, ENSECAG00000021800, ENSECAG00000018370, ENSECAG00000003029, ENSECAG00000022722, ENSECAG00000032970, ENSECAG00000018267, ENSECAG00000023776, ENSECAG00000013053,…	TEX15, MEIKIN, NUF2, HUS1, BRIP1, SPATA22, TERB1, RAD21, BUB1B, RAD50, MND1, FBXO5, WEE2, NCAPD3, CDC25C, ESPL1, BCL2L11, CENPC, TTK, TOP2A, TUBG1, BUB1
GO:1903046_meiotic_cell_cycle_process	0.748	0.64	0.248	0.264	ENSECAG00000010827, ENSECAG00000016913, ENSECAG00000009163, ENSECAG00000013845, ENSECAG00000024392, ENSECAG00000021504, ENSECAG00000017824, ENSECAG00000016392, ENSECAG00000021452, ENSECAG00000010922, ENSECAG00000020362, ENSECAG00000011630, ENSECAG00000021800, ENSECAG00000018370, ENSECAG00000003029, ENSECAG00000022722, ENSECAG00000032970, ENSECAG00000018267, ENSECAG00000023776, ENSECAG00000013053,…	TEX15, MEIKIN, NUF2, HUS1, BRIP1, SPATA22, TERB1, RAD21, BUB1B, RAD50, MND1, FBXO5, WEE2, NCAPD3, CDC25C, ESPL1, BCL2L11, CENPC, TTK, TOP2A, TUBG1, BUB1
GO:0031175_neuron_projection_development	0.444	-0.118	0.224	0.264	ENSECAG00000019993, ENSECAG00000007560, ENSECAG00000023274, ENSECAG00000006665, ENSECAG00000009111, ENSECAG00000011669, ENSECAG00000005815, ENSECAG00000010553, ENSECAG00000020281, ENSECAG00000011938, ENSECAG00000017840, ENSECAG00000022329, ENSECAG00000009523, ENSECAG00000008730, ENSECAG00000022405, ENSECAG00000000558, ENSECAG00000000529, ENSECAG00000025119, ENSECAG00000015935, ENSECAG00000000751,…	KALRN, FXR1, LAMA5, GPM6B, RUFY3, TNN, LLPH, NGF, PAK2, MANF, PAK1, LRRC4C, ISL2, MAP4K4, NOTCH1, KIF5B, MAP1S, FRYL, ACTB, NEDD4L, DTNBP1, SMO, TIAM1, ACTB, VAPA, FMR1, ENAH, TAOK3, PPP1R9B, GSK3B
GO:0045333_cellular_respiration	-0.148	-0.224	0.296	0.272	ENSECAG00000029282, ENSECAG00000016568, ENSECAG00000010849, ENSECAG00000013738, ENSECAG00000012512, ENSECAG00000009780, ENSECAG00000011722, ENSECAG00000038834, ENSECAG00000011808, ENSECAG00000025162, ENSECAG00000028274, ENSECAG00000018466, ENSECAG00000007968, ENSECAG00000021690, ENSECAG00000011122	UQCRQ, CS, MDH1, SLC25A13, COX6A1, UQCRB, COX4I1, MTFR2, SLC25A22, ATP5F1E, NDUFB6, MTFR1, COX5B, NDUFS6, SUCLA2
GO:0010639_negative_regulation_of_organelle_organization	0.454	0.226	0.288	0.272	ENSECAG00000017894, ENSECAG00000013629, ENSECAG00000009003, ENSECAG00000007955, ENSECAG00000022058, ENSECAG00000009190, ENSECAG00000021452, ENSECAG00000011630, ENSECAG00000018367, ENSECAG00000020653, ENSECAG00000013136, ENSECAG00000010047, ENSECAG00000023388, ENSECAG00000015172, ENSECAG00000023776, ENSECAG00000017095, ENSECAG00000017103	CKAP2, ADD3, APC, HNRNPU, ODF2L, TMSB4X, BUB1B, FBXO5, ZWILCH, TMEM39A, ADD1, BUB3, ARPIN, SSH2, TTK, CAMSAP1, BUB1
GO:0044283_small_molecule_biosynthetic_process	0.014	-0.00516	0.272	0.272	ENSECAG00000006875, ENSECAG00000010524, ENSECAG00000023082, ENSECAG00000017251, ENSECAG00000015690, ENSECAG00000015865, ENSECAG00000020880, ENSECAG00000015121, ENSECAG00000016632, ENSECAG00000013127	IP6K2, DCAF5, HACD3, PARK7, SHMT1, GLUL, PSPH, ACSF3, PPIP5K2, PTGES3
GO:0032504_multicellular_organism_reproduction	-0.109	-0.103	0.272	0.272	ENSECAG00000010827, ENSECAG00000016913, ENSECAG00000017037, ENSECAG00000022013, ENSECAG00000009748, ENSECAG00000007254	TEX15, MEIKIN, TDRD5, IFTAP, TDRD1, IZUMO1R
GO:0033674_positive_regulation_of_kinase_activity	0.425	0.256	0.256	0.272	ENSECAG00000017911, ENSECAG00000021238, ENSECAG00000024659, ENSECAG00000011752, ENSECAG00000015006	PDCD10, IGF1R, PRRC1, ATG14, FGFR1
GO:0002684_positive_regulation_of_immune_system_process	0.419	0.325	0.296	0.28	ENSECAG00000006518, ENSECAG00000011917, ENSECAG00000024201, ENSECAG00000023517, ENSECAG00000019809, ENSECAG00000012844, ENSECAG00000010789	SLC39A10, DOCK8, SH2B2, CYRIB, CGAS, TICAM2, AKIRIN2
GO:0009060_aerobic_respiration	-0.101	-0.189	0.296	0.28	ENSECAG00000029282, ENSECAG00000016568, ENSECAG00000010849, ENSECAG00000012512, ENSECAG00000009780, ENSECAG00000011722, ENSECAG00000038834, ENSECAG00000025162, ENSECAG00000028274, ENSECAG00000018466, ENSECAG00000007968, ENSECAG00000021690, ENSECAG00000011122	UQCRQ, CS, MDH1, COX6A1, UQCRB, COX4I1, MTFR2, ATP5F1E, NDUFB6, MTFR1, COX5B, NDUFS6, SUCLA2
GO:0051017_actin_filament_bundle_assembly	0.6	0.652	0.288	0.28	ENSECAG00000033791, ENSECAG00000011991, ENSECAG00000021545, ENSECAG00000014408, ENSECAG00000012734	RHOA, LIMA1, MTSS1, PLS1, BAIAP2L1
GO:0061572_actin_filament_bundle_organization	0.6	0.652	0.288	0.28	ENSECAG00000033791, ENSECAG00000011991, ENSECAG00000021545, ENSECAG00000014408, ENSECAG00000012734	RHOA, LIMA1, MTSS1, PLS1, BAIAP2L1
GO:0006998_nuclear_envelope_organization	-0.459	-0.432	0.28	0.28	ENSECAG00000020144, ENSECAG00000006545, ENSECAG00000000797, ENSECAG00000017201, ENSECAG00000000872	UBXN2A, NSFL1C, SUN2, SUN1, TOR1AIP1
GO:0072594_establishment_of_protein_localization_to_organelle	0.353	0.239	0.272	0.28	ENSECAG00000018130, ENSECAG00000012391, ENSECAG00000024424, ENSECAG00000003968, ENSECAG00000019640, ENSECAG00000011409, ENSECAG00000018233, ENSECAG00000000319, ENSECAG00000025004, ENSECAG00000000361, ENSECAG00000017105, ENSECAG00000015530, ENSECAG00000006920, ENSECAG00000019159, ENSECAG00000016010, ENSECAG00000009669, ENSECAG00000012800, ENSECAG00000022752, ENSECAG00000022600, ENSECAG00000004389,…	ZFAND6, ROMO1, TNPO1, NUP35, TOMM20, TIMM44, NIPBL, SRP14, NUP54, HEATR3, SEC62, KPNA3, SRP72, NUP85, NUP153, GRPEL1, NUP88, NUP214, SPAG1, MFF, SEC63, RAN, SEC61A1, ZFAND2A, KPNA4, VPS36, NUP107, TNPO3, SPCS3, STAM2, PEX1, KPNA7, PMPCB, SPCS2, SRP19
GO:0061512_protein_localization_to_cilium	0.302	0.0513	0.272	0.28	ENSECAG00000019646, ENSECAG00000015360, ENSECAG00000010951, ENSECAG00000015237, ENSECAG00000023433, ENSECAG00000008104, ENSECAG00000012044, ENSECAG00000011655, ENSECAG00000022693, ENSECAG00000014459, ENSECAG00000014240, ENSECAG00000022058, ENSECAG00000011438, ENSECAG00000020710, ENSECAG00000022600, ENSECAG00000024050, ENSECAG00000009886, ENSECAG00000020513, ENSECAG00000010675, ENSECAG00000016999,…	AHI1, IFT122, DNAAF4, PIBF1, TMEM231, DYNLL1, PTPDC1, PCM1, SEPTIN7, ARL13B, IFT46, ODF2L, IFT57, DRC1, SPAG1, SCLT1, TRAF3IP1, CEP89, SPATA7, CEP20, IQCB1, OFD1, SEPTIN2, BBS5, CENPJ, ODF2, IFT74, BBS7, HYLS1, CEP41, CCDC66, CFAP20, IFT88, FBXW8, ENTR1
GO:0006259_DNA_metabolic_process	0.393	0.311	0.264	0.28	ENSECAG00000012810, ENSECAG00000021147, ENSECAG00000011567, ENSECAG00000010827, ENSECAG00000015499, ENSECAG00000028670, ENSECAG00000014072, ENSECAG00000021720, ENSECAG00000013845, ENSECAG00000011391, ENSECAG00000022979, ENSECAG00000018233, ENSECAG00000009962, ENSECAG00000008011, ENSECAG00000024392, ENSECAG00000020522, ENSECAG00000007955, ENSECAG00000020269, ENSECAG00000000796, ENSECAG00000024685,…	TNKS2, ATM, UIMC1, TEX15, XPC, DPPA3, PMS2, NOC3L, HUS1, TET3, MPG, NIPBL, MSH3, MLH3, BRIP1, PRIMPOL, HNRNPU, XRCC4, CETN2, NPM2, PCNA, REV1, CDC7, RTF2, RBBP8, APEX2, ORC6, MCM10, PARG, FANCL, RAD21, MCM6, H1-3, MCM5, POLA1, DEK, ATF7IP2, RNF168, RAD50, ORC5, CGAS, TOP1MT, MND1, RESF1, WDR70, NEIL3, MCM2, DNMT3A, RFC4, INIP, UHRF1, RHNO1, HELLS, TIPIN, GTF2H5, GINS2, ZNF830, GTF2H1, RIF1, TICRR…
GO:0046907_intracellular_transport	0.3	0.0343	0.264	0.28	ENSECAG00000019646, ENSECAG00000022330, ENSECAG00000024920, ENSECAG00000013384, ENSECAG00000015360, ENSECAG00000020824, ENSECAG00000036345, ENSECAG00000018130, ENSECAG00000010951, ENSECAG00000010873, ENSECAG00000012391, ENSECAG00000015237, ENSECAG00000015853, ENSECAG00000018333, ENSECAG00000024424, ENSECAG00000022787, ENSECAG00000007560, ENSECAG00000020655, ENSECAG00000023433, ENSECAG00000003968,…	AHI1, ERGIC2, XPO1, STX3, IFT122, EPS15, SNX12, ZFAND6, DNAAF4, CNIH4, ROMO1, PIBF1, SORT1, EZR, TNPO1, BCAP31, FXR1, GOLGA7, TMEM231, NUP35, TOMM20, TRAK1, TIMM44, DYNLL1, BNIP3, LMAN1, SNX3, SCFD1, PTPDC1, ZDHHC6, HOOK3, SRP14, SAR1A, TMEM87A, ITSN1, NUP54, CCDC91, PCM1, HEATR3, SEPTIN7, LTV1, TRAPPC4, TRIP11, LEPROT, ARL13B, THOC3, DYNC1I2, IFT46, TMED7, SEC62, VPS45, CEP120, RAB11A, MSN, KPNA…
GO:0070646_protein_modification_by_small_protein_removal	0.397	0.471	0.304	0.288	ENSECAG00000011567, ENSECAG00000007240, ENSECAG00000009006, ENSECAG00000016116, ENSECAG00000022272, ENSECAG00000012988, ENSECAG00000011151, ENSECAG00000009628, ENSECAG00000016935, ENSECAG00000017587, ENSECAG00000020871, ENSECAG00000010819, ENSECAG00000021001, ENSECAG00000023565, ENSECAG00000006611, ENSECAG00000012657, ENSECAG00000007234, ENSECAG00000005549, ENSECAG00000020838, ENSECAG00000024709,…	UIMC1, CYLD, USP46, USP36, USP34, UCHL5, USP1, USP7, SENP5, ZRANB1, SENP3, OTUD5, SENP6, ENY2, USP8, USP48, SPATA2, USP9X, USP47, COPS2, USP10, OTUD3, OTUB1
GO:0080134_regulation_of_response_to_stress	0.465	-0.0247	0.288	0.288	ENSECAG00000011567, ENSECAG00000010827, ENSECAG00000007560, ENSECAG00000020602, ENSECAG00000021238, ENSECAG00000007654, ENSECAG00000022081, ENSECAG00000012903, ENSECAG00000012231, ENSECAG00000019809, ENSECAG00000014473, ENSECAG00000021091, ENSECAG00000010789, ENSECAG00000019133, ENSECAG00000021240, ENSECAG00000023884, ENSECAG00000036783, ENSECAG00000009958, ENSECAG00000032767, ENSECAG00000008636,…	UIMC1, TEX15, FXR1, NLRP4, IGF1R, KLHDC10, PARG, WDR76, DEK, CGAS, SEC14L1, TRAF6, AKIRIN2, TIGAR, SH3RF1, NLRP13, SVIP, DUSP1, FMR1, EYA1, OTUB1
GO:0051960_regulation_of_nervous_system_development	0.189	0.023	0.28	0.288	ENSECAG00000038178, ENSECAG00000028820, ENSECAG00000023111, ENSECAG00000010553, ENSECAG00000032992	HEY2, HEY1, CLSTN1, NGF, TIAM1
GO:0045862_positive_regulation_of_proteolysis	0.22	0.0135	0.256	0.288	ENSECAG00000006638, ENSECAG00000019466, ENSECAG00000016261, ENSECAG00000010405, ENSECAG00000021240, ENSECAG00000019705	CASP8AP2, ARIH1, UACA, TRIB2, SH3RF1, CDC20
GO:0009890_negative_regulation_of_biosynthetic_process	0.235	-0.448	0.224	0.288	ENSECAG00000005798, ENSECAG00000001582, ENSECAG00000011357, ENSECAG00000024605, ENSECAG00000012780, ENSECAG00000006101, ENSECAG00000007560, ENSECAG00000019475, ENSECAG00000032622, ENSECAG00000023512, ENSECAG00000000178, ENSECAG00000007955, ENSECAG00000036584, ENSECAG00000023366, ENSECAG00000007205, ENSECAG00000006289, ENSECAG00000016028, ENSECAG00000020475, ENSECAG00000023322, ENSECAG00000011120,…	CNOT7, CNOT6L, GATAD2B, SIN3A, CBX3, ZBTB39, FXR1, YTHDF1, HMX1, MTA3, RUNX1T1, HNRNPU, SKOR1, SUDS3, ZBTB33, NCOR1, N4BP2L2, MIER1, ID3, THRA, DCAF5, YTHDF2, CIART, EXOSC9, SAP18, SAMD4B, BRMS1, ZNF684, CNOT3, PER2, EXOSC8, DNMT3A, GATAD2A, CPEB1, TIPIN, SMARCE1, ZNF830, NR1H2, CBFA2T2, PCGF1, DCPS, LDB1, CHD8, MTA2, SAP130, CTCF, GMNN, TNRC6B, BCL6B, NKAP, LYAR, URI1, PCGF2, PHF21A, FMR1, POT1,…
GO:0031327_negative_regulation_of_cellular_biosynthetic_process	0.235	-0.448	0.224	0.288	ENSECAG00000005798, ENSECAG00000001582, ENSECAG00000011357, ENSECAG00000024605, ENSECAG00000012780, ENSECAG00000006101, ENSECAG00000007560, ENSECAG00000019475, ENSECAG00000032622, ENSECAG00000023512, ENSECAG00000000178, ENSECAG00000007955, ENSECAG00000036584, ENSECAG00000023366, ENSECAG00000007205, ENSECAG00000006289, ENSECAG00000016028, ENSECAG00000020475, ENSECAG00000023322, ENSECAG00000011120,…	CNOT7, CNOT6L, GATAD2B, SIN3A, CBX3, ZBTB39, FXR1, YTHDF1, HMX1, MTA3, RUNX1T1, HNRNPU, SKOR1, SUDS3, ZBTB33, NCOR1, N4BP2L2, MIER1, ID3, THRA, DCAF5, YTHDF2, CIART, EXOSC9, SAP18, SAMD4B, BRMS1, ZNF684, CNOT3, PER2, EXOSC8, DNMT3A, GATAD2A, CPEB1, TIPIN, SMARCE1, ZNF830, NR1H2, CBFA2T2, PCGF1, DCPS, LDB1, CHD8, MTA2, SAP130, CTCF, GMNN, TNRC6B, BCL6B, NKAP, LYAR, URI1, PCGF2, PHF21A, FMR1, POT1,…
GO:0009100_glycoprotein_metabolic_process	-0.0888	-0.0532	0.304	0.296	ENSECAG00000022687, ENSECAG00000019492, ENSECAG00000023746, ENSECAG00000003030, ENSECAG00000018381, ENSECAG00000011390, ENSECAG00000008074, ENSECAG00000024941, ENSECAG00000000212, ENSECAG00000019681, ENSECAG00000033049, ENSECAG00000016078, ENSECAG00000019546	STT3A, MGAT5, NECAB2, RPN1, RPN2, GNPTG, MAGT1, ALG6, DPY19L3, MAN1A2, SERP1, CSGALNACT2, DDOST
GO:0051338_regulation_of_transferase_activity	0.432	0.163	0.296	0.296	ENSECAG00000021289, ENSECAG00000019837, ENSECAG00000017911, ENSECAG00000016020, ENSECAG00000021238, ENSECAG00000016023, ENSECAG00000020270, ENSECAG00000024659, ENSECAG00000019369, ENSECAG00000011752, ENSECAG00000033344, ENSECAG00000008787, ENSECAG00000014813, ENSECAG00000020161, ENSECAG00000015006, ENSECAG00000010405, ENSECAG00000001853, ENSECAG00000015806, ENSECAG00000012588, ENSECAG00000014113,…	CCNE1, PIK3R1, PDCD10, CCNJ, IGF1R, CCNO, CCNE2, PRRC1, CCNF, ATG14, PIK3R3, CCNB3, CCNB2, CCNI, FGFR1, TRIB2, CCNH, CCNB1, DTNBP1, CCNG2, MNAT1, DCUN1D1, SH3BP5, POT1, CBLB
GO:0001578_microtubule_bundle_formation	0.323	0.0874	0.288	0.296	ENSECAG00000019646, ENSECAG00000014169, ENSECAG00000015360, ENSECAG00000010951, ENSECAG00000015237, ENSECAG00000023433, ENSECAG00000008104, ENSECAG00000012044, ENSECAG00000011655, ENSECAG00000022693, ENSECAG00000014459, ENSECAG00000014240, ENSECAG00000022058, ENSECAG00000011438, ENSECAG00000020710, ENSECAG00000022600, ENSECAG00000024050, ENSECAG00000009886, ENSECAG00000020513, ENSECAG00000016999,…	AHI1, CCSER2, IFT122, DNAAF4, PIBF1, TMEM231, DYNLL1, PTPDC1, PCM1, SEPTIN7, ARL13B, IFT46, ODF2L, IFT57, DRC1, SPAG1, SCLT1, TRAF3IP1, CEP89, CEP20, IQCB1, OFD1, NCKAP5, SEPTIN2, BBS5, CENPJ, ODF2, IFT74, BBS7, HYLS1, CEP41, CCDC66, CFAP20, IFT88, FBXW8, ENTR1
GO:0048523_negative_regulation_of_cellular_process	0.193	-0.501	0.288	0.296	ENSECAG00000017894, ENSECAG00000008992, ENSECAG00000005798, ENSECAG00000021147, ENSECAG00000020286, ENSECAG00000001582, ENSECAG00000021358, ENSECAG00000020524, ENSECAG00000011357, ENSECAG00000024605, ENSECAG00000012780, ENSECAG00000013629, ENSECAG00000011935, ENSECAG00000006101, ENSECAG00000028670, ENSECAG00000019545, ENSECAG00000007560, ENSECAG00000024797, ENSECAG00000031204, ENSECAG00000020071,…	CKAP2, HYPK, CNOT7, ATM, BIRC7, CNOT6L, SFRP1, MRNIP, GATAD2B, SIN3A, CBX3, ADD3, SMURF2, ZBTB39, DPPA3, BIRC6, FXR1, PDE3B, PIM3, XIAP, RB1, ZNRF3, YTHDF1, HUS1, ZCCHC17, APC, AVEN, SVBP, HMX1, MTA3, RUNX1T1, HNRNPU, SKOR1, SUDS3, ZBTB33, NCOR1, N4BP2L2, MIER1, ID3, BIRC5, KCTD13, LEPROT, THRA, DCAF5, YTHDF2, CIART, EXOSC9, SAP18, SAMD4B, BRMS1, ODF2L, AGR2, TMSB4X, CDC6, NGF, H1-3, RNF34, WDR76…
GO:0097190_apoptotic_signaling_pathway	0.528	0.319	0.28	0.296	ENSECAG00000007240, ENSECAG00000006638, ENSECAG00000017458, ENSECAG00000022379, ENSECAG00000011461, ENSECAG00000005770, ENSECAG00000015502, ENSECAG00000018209, ENSECAG00000025005, ENSECAG00000007350, ENSECAG00000008636, ENSECAG00000024935	CYLD, CASP8AP2, BNIP3, RNF34, ARMC10, BNIP3L, RFFL, CAAP1, BCL10, SIVA1, EYA1, GSK3B
GO:0010605_negative_regulation_of_macromolecule_metabolic_process	0.0766	-0.593	0.256	0.296	ENSECAG00000005798, ENSECAG00000001582, ENSECAG00000011357, ENSECAG00000018988, ENSECAG00000024605, ENSECAG00000012780, ENSECAG00000017022, ENSECAG00000006101, ENSECAG00000011063, ENSECAG00000028670, ENSECAG00000010812, ENSECAG00000007560, ENSECAG00000019475, ENSECAG00000025040, ENSECAG00000019655, ENSECAG00000032622, ENSECAG00000023512, ENSECAG00000000178, ENSECAG00000007955, ENSECAG00000036584,…	CNOT7, CNOT6L, GATAD2B, XRN2, SIN3A, CBX3, UPF2, ZBTB39, MOV10L1, DPPA3, EDC4, FXR1, YTHDF1, ZCCHC17, SVBP, HMX1, MTA3, RUNX1T1, HNRNPU, SKOR1, SUDS3, ZBTB33, NCOR1, N4BP2L2, MIER1, ID3, THRA, PIWIL1, YTHDF2, CIART, ZC3H7A, EXOSC9, SAP18, SAMD4B, BRMS1, H1-3, RNF34, ANGEL2, ZNF684, ATF7IP2, CNOT3, CGAS, PER2, RESF1, EXOSC8, DNMT3A, GATAD2A, CPEB1, HELLS, TIPIN, SMARCE1, SRRT, ZNF830, NR1H2, CBFA2…
GO:0045787_positive_regulation_of_cell_cycle	0.228	0.159	0.344	0.304	ENSECAG00000007955, ENSECAG00000021916, ENSECAG00000003029, ENSECAG00000014613, ENSECAG00000000235	HNRNPU, CEP120, CDC25C, DBF4, MTBP
GO:0090068_positive_regulation_of_cell_cycle_process	0.228	0.159	0.344	0.304	ENSECAG00000007955, ENSECAG00000021916, ENSECAG00000003029, ENSECAG00000014613, ENSECAG00000000235	HNRNPU, CEP120, CDC25C, DBF4, MTBP
GO:0000279_M_phase	0.267	0.216	0.32	0.304	ENSECAG00000010827, ENSECAG00000016913, ENSECAG00000024392, ENSECAG00000017824, ENSECAG00000016392, ENSECAG00000020362, ENSECAG00000021800, ENSECAG00000032970, ENSECAG00000018267, ENSECAG00000013053	TEX15, MEIKIN, BRIP1, TERB1, RAD21, MND1, WEE2, BCL2L11, CENPC, TOP2A
GO:0007127_meiosis_I	0.267	0.216	0.32	0.304	ENSECAG00000010827, ENSECAG00000016913, ENSECAG00000024392, ENSECAG00000017824, ENSECAG00000016392, ENSECAG00000020362, ENSECAG00000021800, ENSECAG00000032970, ENSECAG00000018267, ENSECAG00000013053	TEX15, MEIKIN, BRIP1, TERB1, RAD21, MND1, WEE2, BCL2L11, CENPC, TOP2A
GO:0007134_meiotic_telophase_I	0.267	0.216	0.32	0.304	ENSECAG00000010827, ENSECAG00000016913, ENSECAG00000024392, ENSECAG00000017824, ENSECAG00000016392, ENSECAG00000020362, ENSECAG00000021800, ENSECAG00000032970, ENSECAG00000018267, ENSECAG00000013053	TEX15, MEIKIN, BRIP1, TERB1, RAD21, MND1, WEE2, BCL2L11, CENPC, TOP2A
GO:0051326_telophase	0.267	0.216	0.32	0.304	ENSECAG00000010827, ENSECAG00000016913, ENSECAG00000024392, ENSECAG00000017824, ENSECAG00000016392, ENSECAG00000020362, ENSECAG00000021800, ENSECAG00000032970, ENSECAG00000018267, ENSECAG00000013053	TEX15, MEIKIN, BRIP1, TERB1, RAD21, MND1, WEE2, BCL2L11, CENPC, TOP2A
GO:0098762_meiotic_cell_cycle_phase	0.267	0.216	0.32	0.304	ENSECAG00000010827, ENSECAG00000016913, ENSECAG00000024392, ENSECAG00000017824, ENSECAG00000016392, ENSECAG00000020362, ENSECAG00000021800, ENSECAG00000032970, ENSECAG00000018267, ENSECAG00000013053	TEX15, MEIKIN, BRIP1, TERB1, RAD21, MND1, WEE2, BCL2L11, CENPC, TOP2A
GO:0098764_meiosis_I_cell_cycle_phase	0.267	0.216	0.32	0.304	ENSECAG00000010827, ENSECAG00000016913, ENSECAG00000024392, ENSECAG00000017824, ENSECAG00000016392, ENSECAG00000020362, ENSECAG00000021800, ENSECAG00000032970, ENSECAG00000018267, ENSECAG00000013053	TEX15, MEIKIN, BRIP1, TERB1, RAD21, MND1, WEE2, BCL2L11, CENPC, TOP2A
GO:1902533_positive_regulation_of_intracellular_signal_transduction	0.0989	-0.145	0.312	0.304	ENSECAG00000013569, ENSECAG00000009706, ENSECAG00000005374, ENSECAG00000023011, ENSECAG00000017911, ENSECAG00000015363, ENSECAG00000021238, ENSECAG00000007654, ENSECAG00000005729, ENSECAG00000008715, ENSECAG00000021821, ENSECAG00000021091, ENSECAG00000012844, ENSECAG00000016918, ENSECAG00000021240, ENSECAG00000022080, ENSECAG00000006312, ENSECAG00000016986, ENSECAG00000021234	LAMTOR3, AKAP13, WAC, RIPK2, PDCD10, KLHL22, IGF1R, KLHDC10, RRAGA, TMEM9B, LAMTOR5, TRAF6, TICAM2, TMED4, SH3RF1, LAMTOR1, LAMTOR4, PPM1B, NET1
GO:0008283_cell_population_proliferation	0.273	0.257	0.304	0.304	ENSECAG00000021916, ENSECAG00000014842, ENSECAG00000020208, ENSECAG00000018810, ENSECAG00000009667, ENSECAG00000031442, ENSECAG00000011380, ENSECAG00000012564, ENSECAG00000015046	CEP120, TACC1, LIFR, HELLS, EAPP, FGF16, TACC3, BTG4, TFAP2B
GO:0006367_transcription_initiation_from_RNA_polymerase_II_promoter	0.206	0.25	0.304	0.304	ENSECAG00000012182, ENSECAG00000016769, ENSECAG00000024914, ENSECAG00000021923, ENSECAG00000000246, ENSECAG00000023048, ENSECAG00000005853	GTF2A2, TAF4B, GTF2B, GTF2F2, GTF2F1, TAF4, TAF5
GO:0051641_cellular_localization	0.189	-0.0662	0.304	0.304	ENSECAG00000019646, ENSECAG00000012810, ENSECAG00000015766, ENSECAG00000022330, ENSECAG00000024920, ENSECAG00000013384, ENSECAG00000015360, ENSECAG00000020824, ENSECAG00000036345, ENSECAG00000018130, ENSECAG00000010951, ENSECAG00000010873, ENSECAG00000012391, ENSECAG00000015237, ENSECAG00000016925, ENSECAG00000015853, ENSECAG00000018333, ENSECAG00000024424, ENSECAG00000021882, ENSECAG00000024272,…	AHI1, TNKS2, SNCA, ERGIC2, XPO1, STX3, IFT122, EPS15, SNX12, ZFAND6, DNAAF4, CNIH4, ROMO1, PIBF1, WAPL, SORT1, EZR, TNPO1, YWHAZ, RIMS1, BCAP31, FXR1, GOLGA7, SEPTIN11, TMEM231, NUP35, TOMM20, TRAK1, TIMM44, NUF2, DYNLL1, BNIP3, RAB13, CACNA1E, LMAN1, SNX3, NUSAP1, TM9SF4, SCFD1, PTPDC1, NIPBL, ZDHHC6, FTH1, HOOK3, SLC17A6, SRP14, SAR1A, TMEM87A, HNRNPU, ITSN1, NUP54, MAPRE1, CCDC91, PCM1, TERB1,…
GO:0032465_regulation_of_cytokinesis	0.298	0.257	0.296	0.304	ENSECAG00000023961, ENSECAG00000000354, ENSECAG00000006869, ENSECAG00000017777, ENSECAG00000010463	AURKA, PLK2, MAP9, PLK1, ENTR1
GO:0030178_negative_regulation_of_Wnt_signaling_pathway	0.311	0.144	0.296	0.304	ENSECAG00000021358, ENSECAG00000011694, ENSECAG00000009003, ENSECAG00000013680, ENSECAG00000016102, ENSECAG00000017118, ENSECAG00000024935	SFRP1, ZNRF3, APC, TLE1, CHD8, TLE7, GSK3B
GO:0090090_negative_regulation_of_canonical_Wnt_signaling_pathway	0.311	0.144	0.296	0.304	ENSECAG00000021358, ENSECAG00000011694, ENSECAG00000009003, ENSECAG00000013680, ENSECAG00000016102, ENSECAG00000017118, ENSECAG00000024935	SFRP1, ZNRF3, APC, TLE1, CHD8, TLE7, GSK3B
GO:1902414_protein_localization_to_cell_junction	0.484	0.421	0.28	0.304	ENSECAG00000013384, ENSECAG00000012282, ENSECAG00000020528, ENSECAG00000023865, ENSECAG00000019987	STX3, MPP7, TJP1, RAB11A, GRIPAP1
GO:0090307_mitotic_spindle_assembly	0.4	0.387	0.384	0.312	ENSECAG00000006607, ENSECAG00000017906, ENSECAG00000021391, ENSECAG00000007955, ENSECAG00000005178, ENSECAG00000006869, ENSECAG00000014542, ENSECAG00000006712, ENSECAG00000008051	KIF11, PRC1, CLASP1, HNRNPU, CCSAP, MAP9, SPICE1, WRAP73, CEP192
GO:0042147_retrograde_transport,_endosome_to_Golgi	-0.0886	-0.0259	0.336	0.312	ENSECAG00000036345, ENSECAG00000022664, ENSECAG00000014989, ENSECAG00000022694, ENSECAG00000003237, ENSECAG00000014737, ENSECAG00000019019, ENSECAG00000004911, ENSECAG00000024436, ENSECAG00000020307	SNX12, SNX3, TMEM87A, RAB6A, GCC2, HEATR5B, SNX1, VPS35, ANK2, DENND2A
GO:0044772_mitotic_cell_cycle_phase_transition	0.366	0.133	0.32	0.312	ENSECAG00000021289, ENSECAG00000020524, ENSECAG00000014575, ENSECAG00000013845, ENSECAG00000018235, ENSECAG00000016020, ENSECAG00000016023, ENSECAG00000007006, ENSECAG00000020270, ENSECAG00000009913, ENSECAG00000019369, ENSECAG00000021452, ENSECAG00000008787, ENSECAG00000014813, ENSECAG00000020161, ENSECAG00000021177, ENSECAG00000003872, ENSECAG00000018367, ENSECAG00000021453, ENSECAG00000015806,…	CCNE1, MRNIP, RB1, HUS1, AVEN, CCNJ, CCNO, ANAPC1, CCNE2, CDC6, CCNF, BUB1B, CCNB3, CCNB2, CCNI, CDK2, ZNF830, ZWILCH, TICRR, CCNB1, CDK4, CCNG2, CDC25C, MTBP, BUB3, TTK, BUB1
GO:0008610_lipid_biosynthetic_process	0.356	0.307	0.312	0.312	ENSECAG00000019837, ENSECAG00000014481, ENSECAG00000015019, ENSECAG00000006875, ENSECAG00000006280, ENSECAG00000010524, ENSECAG00000021699, ENSECAG00000023082, ENSECAG00000011752, ENSECAG00000033344, ENSECAG00000021665, ENSECAG00000005838, ENSECAG00000015121, ENSECAG00000011539, ENSECAG00000000186, ENSECAG00000013127, ENSECAG00000011192	PIK3R1, AGPAT1, PIK3CA, IP6K2, LPIN2, DCAF5, SOCS7, HACD3, ATG14, PIK3R3, SGMS2, MOGAT1, ACSF3, CHKA, DEGS1, PTGES3, LBR
GO:0007034_vacuolar_transport	0.114	0.129	0.312	0.312	ENSECAG00000014600, ENSECAG00000014912, ENSECAG00000016346, ENSECAG00000018146, ENSECAG00000021355, ENSECAG00000012559, ENSECAG00000024436, ENSECAG00000007123	TRAK1, CCDC91, LEPROT, VPS36, STAM2, RAB7A, ANK2, CHMP3
GO:0043410_positive_regulation_of_MAPK_cascade	0.0853	-0.0727	0.312	0.312	ENSECAG00000017911, ENSECAG00000021238, ENSECAG00000007654, ENSECAG00000021091, ENSECAG00000021240, ENSECAG00000022080	PDCD10, IGF1R, KLHDC10, TRAF6, SH3RF1, LAMTOR1
GO:0043281_regulation_of_cysteine-type_endopeptidase_activity_involved_in_apoptotic_process	0.322	0.0828	0.304	0.312	ENSECAG00000006638, ENSECAG00000022379, ENSECAG00000016261, ENSECAG00000015502, ENSECAG00000018209	CASP8AP2, RNF34, UACA, RFFL, CAAP1
GO:0010558_negative_regulation_of_macromolecule_biosynthetic_process	0.137	-0.552	0.288	0.312	ENSECAG00000005798, ENSECAG00000001582, ENSECAG00000011357, ENSECAG00000024605, ENSECAG00000012780, ENSECAG00000006101, ENSECAG00000007560, ENSECAG00000019475, ENSECAG00000032622, ENSECAG00000023512, ENSECAG00000000178, ENSECAG00000007955, ENSECAG00000036584, ENSECAG00000023366, ENSECAG00000007205, ENSECAG00000006289, ENSECAG00000016028, ENSECAG00000020475, ENSECAG00000023322, ENSECAG00000011120,…	CNOT7, CNOT6L, GATAD2B, SIN3A, CBX3, ZBTB39, FXR1, YTHDF1, HMX1, MTA3, RUNX1T1, HNRNPU, SKOR1, SUDS3, ZBTB33, NCOR1, N4BP2L2, MIER1, ID3, THRA, YTHDF2, CIART, EXOSC9, SAP18, SAMD4B, BRMS1, ZNF684, CNOT3, PER2, EXOSC8, DNMT3A, GATAD2A, CPEB1, TIPIN, SMARCE1, ZNF830, NR1H2, CBFA2T2, PCGF1, DCPS, LDB1, CHD8, MTA2, SAP130, CTCF, GMNN, TNRC6B, BCL6B, NKAP, LYAR, URI1, PCGF2, PHF21A, FMR1, POT1, CIR1, …
GO:2000113_negative_regulation_of_cellular_macromolecule_biosynthetic_process	0.137	-0.552	0.288	0.312	ENSECAG00000005798, ENSECAG00000001582, ENSECAG00000011357, ENSECAG00000024605, ENSECAG00000012780, ENSECAG00000006101, ENSECAG00000007560, ENSECAG00000019475, ENSECAG00000032622, ENSECAG00000023512, ENSECAG00000000178, ENSECAG00000007955, ENSECAG00000036584, ENSECAG00000023366, ENSECAG00000007205, ENSECAG00000006289, ENSECAG00000016028, ENSECAG00000020475, ENSECAG00000023322, ENSECAG00000011120,…	CNOT7, CNOT6L, GATAD2B, SIN3A, CBX3, ZBTB39, FXR1, YTHDF1, HMX1, MTA3, RUNX1T1, HNRNPU, SKOR1, SUDS3, ZBTB33, NCOR1, N4BP2L2, MIER1, ID3, THRA, YTHDF2, CIART, EXOSC9, SAP18, SAMD4B, BRMS1, ZNF684, CNOT3, PER2, EXOSC8, DNMT3A, GATAD2A, CPEB1, TIPIN, SMARCE1, ZNF830, NR1H2, CBFA2T2, PCGF1, DCPS, LDB1, CHD8, MTA2, SAP130, CTCF, GMNN, TNRC6B, BCL6B, NKAP, LYAR, URI1, PCGF2, PHF21A, FMR1, POT1, CIR1, …
GO:0006338_chromatin_remodeling	0.387	0.317	0.336	0.32	ENSECAG00000030438, ENSECAG00000007524, ENSECAG00000001445, ENSECAG00000025118, ENSECAG00000015098, ENSECAG00000024685, ENSECAG00000023585, ENSECAG00000012089, ENSECAG00000032705, ENSECAG00000018222, ENSECAG00000022440, ENSECAG00000018926, ENSECAG00000015040, ENSECAG00000021950, ENSECAG00000019916, ENSECAG00000000545, ENSECAG00000018810, ENSECAG00000000066, ENSECAG00000015661, ENSECAG00000021281,…	BRD4, NPM3, CHD7, TADA2A, MORC3, NPM2, SATB1, BRD2, H1-3, KDM4A, HCFC1, CFDP1, NASP, NPM1, BPTF, RUVBL1, HELLS, NAP1L1, BRDT, KDM5A, CHD8, SMARCA5, SPTY2D1, YEATS4, KDM5B, CHD1, CHD4, H1-4, BRD3, HCFC2
GO:0042692_muscle_cell_differentiation	0.148	0.191	0.336	0.32	ENSECAG00000008709, ENSECAG00000021777, ENSECAG00000021186, ENSECAG00000019476, ENSECAG00000015606, ENSECAG00000015345	LMOD3, ACTN4, FHOD3, ACTN1, CSRP2, RBPMS2
GO:0061061_muscle_structure_development	0.148	0.191	0.336	0.32	ENSECAG00000008709, ENSECAG00000021777, ENSECAG00000021186, ENSECAG00000019476, ENSECAG00000015606, ENSECAG00000015345	LMOD3, ACTN4, FHOD3, ACTN1, CSRP2, RBPMS2
GO:0006378_mRNA_polyadenylation	0.297	0.29	0.32	0.32	ENSECAG00000009859, ENSECAG00000024732, ENSECAG00000021027, ENSECAG00000012606, ENSECAG00000023935, ENSECAG00000000691, ENSECAG00000018683, ENSECAG00000019415	PAPOLG, EXOSC9, PAPOLA, EXOSC8, CPSF2, WDR33, PCF11, FIP1L1
GO:0007389_pattern_specification_process	-0.0339	-0.2	0.32	0.32	ENSECAG00000038178, ENSECAG00000009003, ENSECAG00000028820, ENSECAG00000008431, ENSECAG00000007129	HEY2, APC, HEY1, HOXA9, LRP6
GO:0006810_transport	-0.0499	-0.25	0.32	0.32	ENSECAG00000019646, ENSECAG00000005207, ENSECAG00000015766, ENSECAG00000024970, ENSECAG00000022330, ENSECAG00000024920, ENSECAG00000013384, ENSECAG00000015360, ENSECAG00000020824, ENSECAG00000036345, ENSECAG00000018130, ENSECAG00000010951, ENSECAG00000014112, ENSECAG00000010873, ENSECAG00000012391, ENSECAG00000015237, ENSECAG00000008013, ENSECAG00000013398, ENSECAG00000015853, ENSECAG00000018333,…	AHI1, RAB4A, SNCA, KCNQ1, ERGIC2, XPO1, STX3, IFT122, EPS15, SNX12, ZFAND6, DNAAF4, SLC20A1, CNIH4, ROMO1, PIBF1, NMB, SLCO3A1, SORT1, EZR, TNPO1, RIMS1, BCAP31, FXR1, GOLGA7, TMEM231, NUP35, TOMM20, ATP5F1C, SYT11, TRAK1, TIMM44, SLC16A1, UQCRQ, SCNN1G, TXNIP, CADPS2, DYNLL1, SLC39A10, BNIP3, RAB13, CACNA1E, LMAN1, SNX3, VAMP7, KCNK10, SCFD1, PTPDC1, KCNN2, RAB11FIP1, SLC48A1, CSNK1G2, ZDHHC6, S…
GO:0032268_regulation_of_cellular_protein_metabolic_process	0.14	-0.534	0.288	0.32	ENSECAG00000021289, ENSECAG00000005798, ENSECAG00000020286, ENSECAG00000023233, ENSECAG00000001582, ENSECAG00000014582, ENSECAG00000006638, ENSECAG00000007560, ENSECAG00000020071, ENSECAG00000019475, ENSECAG00000025118, ENSECAG00000017911, ENSECAG00000016020, ENSECAG00000019655, ENSECAG00000016023, ENSECAG00000008466, ENSECAG00000019466, ENSECAG00000020015, ENSECAG00000023108, ENSECAG00000024732,…	CCNE1, CNOT7, BIRC7, BMP15, CNOT6L, UFL1, CASP8AP2, FXR1, XIAP, YTHDF1, TADA2A, PDCD10, CCNJ, SVBP, CCNO, BIRC5, ARIH1, BMP6, YTHDF2, EXOSC9, SAMD4B, CCNE2, SDCBP, PPP6R3, NGF, PARG, RNF34, CTR9, PRRC1, CCNF, UACA, CNOT3, CCNB3, CCNB2, EXOSC8, CCNI, WDR70, CNBP, MOB1B, CPEB1, TRIB2, CCNH, RACK1, UPF3A, DCPS, FGF16, SH3RF1, CCNB1, CSNK2B, TNRC6B, DTNBP1, CCNG2, MNAT1, GDF9, SVIP, SSB, ENSA, NUB1, …
GO:0009057_macromolecule_catabolic_process	0.111	-0.269	0.264	0.32	ENSECAG00000005798, ENSECAG00000020144, ENSECAG00000024205, ENSECAG00000001582, ENSECAG00000006545, ENSECAG00000018988, ENSECAG00000014582, ENSECAG00000028965, ENSECAG00000011935, ENSECAG00000017022, ENSECAG00000020881, ENSECAG00000000162, ENSECAG00000011728, ENSECAG00000035031, ENSECAG00000010812, ENSECAG00000011878, ENSECAG00000007560, ENSECAG00000012970, ENSECAG00000024327, ENSECAG00000011694,…	CNOT7, UBXN2A, HSPA5, CNOT6L, NSFL1C, XRN2, UFL1, NEDD8, SMURF2, UPF2, CTSC, TRIP12, PYGL, UBB, EDC4, DTL, FXR1, FAF2, FBXL5, ZNRF3, YTHDF1, ELOC, ZCCHC17, KLHL22, PCYOX1L, HUWE1, APC, ABHD17A, HNRNPU, FBXO11, RNF111, ABHD17B, KCTD13, TBC1D22B, ARIH1, FBXO45, YTHDF2, ANAPC1, BFAR, RNF130, PCNA, EXOSC9, SAMD4B, UBE2D1, PLAA, DERL2, UBQLN1, UBE2S, AMN1, RNF34, ANGEL2, COPS3, POLA1, CANX, UBE2K, CNO…
GO:0061982_meiosis_I_cell_cycle_process	0.31	0.258	0.336	0.328	ENSECAG00000010827, ENSECAG00000016913, ENSECAG00000024392, ENSECAG00000017824, ENSECAG00000016392, ENSECAG00000020362, ENSECAG00000021800, ENSECAG00000003029, ENSECAG00000032970, ENSECAG00000018267, ENSECAG00000013053	TEX15, MEIKIN, BRIP1, TERB1, RAD21, MND1, WEE2, CDC25C, BCL2L11, CENPC, TOP2A
GO:0006913_nucleocytoplasmic_transport	0.394	0.313	0.328	0.328	ENSECAG00000024920, ENSECAG00000024424, ENSECAG00000003968, ENSECAG00000025004, ENSECAG00000000361, ENSECAG00000007602, ENSECAG00000011555, ENSECAG00000015530, ENSECAG00000019159, ENSECAG00000010701, ENSECAG00000016010, ENSECAG00000012800, ENSECAG00000020724, ENSECAG00000022752, ENSECAG00000010431, ENSECAG00000017046, ENSECAG00000020532, ENSECAG00000021950, ENSECAG00000023235, ENSECAG00000004492,…	XPO1, TNPO1, NUP35, NUP54, HEATR3, LTV1, THOC3, KPNA3, NUP85, EIF6, NUP153, NUP88, TPR, NUP214, THOC2, THOC6, RAN, NPM1, KPNA4, RRS1, NUP107, TNPO3, ENY2, RANBP3, IWS1, UHMK1, KPNA7, SDAD1, SARNP
GO:0051169_nuclear_transport	0.394	0.313	0.328	0.328	ENSECAG00000024920, ENSECAG00000024424, ENSECAG00000003968, ENSECAG00000025004, ENSECAG00000000361, ENSECAG00000007602, ENSECAG00000011555, ENSECAG00000015530, ENSECAG00000019159, ENSECAG00000010701, ENSECAG00000016010, ENSECAG00000012800, ENSECAG00000020724, ENSECAG00000022752, ENSECAG00000010431, ENSECAG00000017046, ENSECAG00000020532, ENSECAG00000021950, ENSECAG00000023235, ENSECAG00000004492,…	XPO1, TNPO1, NUP35, NUP54, HEATR3, LTV1, THOC3, KPNA3, NUP85, EIF6, NUP153, NUP88, TPR, NUP214, THOC2, THOC6, RAN, NPM1, KPNA4, RRS1, NUP107, TNPO3, ENY2, RANBP3, IWS1, UHMK1, KPNA7, SDAD1, SARNP
GO:1901990_regulation_of_mitotic_cell_cycle_phase_transition	0.373	0.156	0.328	0.328	ENSECAG00000020524, ENSECAG00000014575, ENSECAG00000013845, ENSECAG00000018235, ENSECAG00000009913, ENSECAG00000021452, ENSECAG00000021177, ENSECAG00000003872, ENSECAG00000018367, ENSECAG00000021453, ENSECAG00000025015, ENSECAG00000003029, ENSECAG00000000235, ENSECAG00000010047, ENSECAG00000023776, ENSECAG00000017103	MRNIP, RB1, HUS1, AVEN, CDC6, BUB1B, CDK2, ZNF830, ZWILCH, TICRR, CDK4, CDC25C, MTBP, BUB3, TTK, BUB1
GO:0051649_establishment_of_localization_in_cell	0.125	-0.166	0.328	0.328	ENSECAG00000019646, ENSECAG00000015766, ENSECAG00000022330, ENSECAG00000024920, ENSECAG00000013384, ENSECAG00000015360, ENSECAG00000020824, ENSECAG00000036345, ENSECAG00000018130, ENSECAG00000010951, ENSECAG00000010873, ENSECAG00000012391, ENSECAG00000015237, ENSECAG00000015853, ENSECAG00000018333, ENSECAG00000024424, ENSECAG00000024272, ENSECAG00000022787, ENSECAG00000007560, ENSECAG00000020655,…	AHI1, SNCA, ERGIC2, XPO1, STX3, IFT122, EPS15, SNX12, ZFAND6, DNAAF4, CNIH4, ROMO1, PIBF1, SORT1, EZR, TNPO1, RIMS1, BCAP31, FXR1, GOLGA7, TMEM231, NUP35, TOMM20, TRAK1, TIMM44, NUF2, DYNLL1, BNIP3, CACNA1E, LMAN1, SNX3, NUSAP1, SCFD1, PTPDC1, ZDHHC6, HOOK3, SLC17A6, SRP14, SAR1A, TMEM87A, HNRNPU, ITSN1, NUP54, CCDC91, PCM1, TERB1, HEATR3, SEPTIN7, LTV1, TRAPPC4, TRIP11, LEPROT, ARL13B, THOC3, DY…
GO:0033365_protein_localization_to_organelle	0.319	0.0715	0.312	0.328	ENSECAG00000019646, ENSECAG00000012810, ENSECAG00000015360, ENSECAG00000018130, ENSECAG00000010951, ENSECAG00000012391, ENSECAG00000015237, ENSECAG00000016925, ENSECAG00000018333, ENSECAG00000024424, ENSECAG00000022787, ENSECAG00000023433, ENSECAG00000003968, ENSECAG00000019640, ENSECAG00000011409, ENSECAG00000008104, ENSECAG00000012044, ENSECAG00000018233, ENSECAG00000000319, ENSECAG00000025004,…	AHI1, TNKS2, IFT122, ZFAND6, DNAAF4, ROMO1, PIBF1, WAPL, EZR, TNPO1, BCAP31, TMEM231, NUP35, TOMM20, TIMM44, DYNLL1, PTPDC1, NIPBL, SRP14, NUP54, MAPRE1, PCM1, HEATR3, SEPTIN7, ARL13B, IFT46, SEC62, MSN, KPNA3, SRP72, NUP85, ODF2L, NUP153, IFT57, GRPEL1, DRC1, STIL, NUP88, NUP214, WDR83OS, SPAG1, LMBRD1, MFF, NASP, SCLT1, SEC63, RAN, MAPRE2, WRAP73, TRAF3IP1, SEC61A1, ZFAND2A, KPNA4, CEP89, VPS36…
GO:0034250_positive_regulation_of_cellular_amide_metabolic_process	0.74	0.0384	0.264	0.328	ENSECAG00000007560, ENSECAG00000009512, ENSECAG00000017141, ENSECAG00000018495, ENSECAG00000017002, ENSECAG00000008744, ENSECAG00000020316, ENSECAG00000032767, ENSECAG00000001088, ENSECAG00000016947	FXR1, CNBP, UPF3A, SSB, LARP1, UHMK1, RPS9, FMR1, LARP1B, UPF3B
GO:0045727_positive_regulation_of_translation	0.74	0.0384	0.264	0.328	ENSECAG00000007560, ENSECAG00000009512, ENSECAG00000017141, ENSECAG00000018495, ENSECAG00000017002, ENSECAG00000008744, ENSECAG00000020316, ENSECAG00000032767, ENSECAG00000001088, ENSECAG00000016947	FXR1, CNBP, UPF3A, SSB, LARP1, UHMK1, RPS9, FMR1, LARP1B, UPF3B
GO:0051225_spindle_assembly	0.412	0.418	0.368	0.336	ENSECAG00000006607, ENSECAG00000017906, ENSECAG00000021391, ENSECAG00000007955, ENSECAG00000010222, ENSECAG00000005178, ENSECAG00000006869, ENSECAG00000014542, ENSECAG00000012845, ENSECAG00000006712, ENSECAG00000016553, ENSECAG00000021001, ENSECAG00000004593, ENSECAG00000008051	KIF11, PRC1, CLASP1, HNRNPU, MAPRE1, CCSAP, MAP9, SPICE1, MAPRE2, WRAP73, HAUS1, SENP6, HAUS3, CEP192
GO:0090630_activation_of_GTPase_activity	0.334	0.379	0.352	0.336	ENSECAG00000024937, ENSECAG00000003759, ENSECAG00000024286, ENSECAG00000009393, ENSECAG00000012024, ENSECAG00000014059, ENSECAG00000032992, ENSECAG00000023646	TBC1D21, TBC1D14, SIPA1L1, ARHGAP29, TBC1D8, ECT2, TIAM1, EVI5
GO:0015980_energy_derivation_by_oxidation_of_organic_compounds	-0.288	-0.357	0.352	0.336	ENSECAG00000011728, ENSECAG00000029282, ENSECAG00000016568, ENSECAG00000010849, ENSECAG00000013738, ENSECAG00000012512, ENSECAG00000009780, ENSECAG00000011722, ENSECAG00000038834, ENSECAG00000011808, ENSECAG00000025162, ENSECAG00000028274, ENSECAG00000018466, ENSECAG00000007968, ENSECAG00000021690, ENSECAG00000011122	PYGL, UQCRQ, CS, MDH1, SLC25A13, COX6A1, UQCRB, COX4I1, MTFR2, SLC25A22, ATP5F1E, NDUFB6, MTFR1, COX5B, NDUFS6, SUCLA2
GO:0051493_regulation_of_cytoskeleton_organization	0.413	0.256	0.344	0.336	ENSECAG00000017894, ENSECAG00000013629, ENSECAG00000017234, ENSECAG00000024334, ENSECAG00000018435, ENSECAG00000009003, ENSECAG00000007955, ENSECAG00000010222, ENSECAG00000023879, ENSECAG00000000050, ENSECAG00000005178, ENSECAG00000021916, ENSECAG00000009648, ENSECAG00000009190, ENSECAG00000021545, ENSECAG00000017840, ENSECAG00000012845, ENSECAG00000009886, ENSECAG00000004274, ENSECAG00000000529,…	CKAP2, ADD3, ARHGAP17, CARMIL1, WDR1, APC, HNRNPU, MAPRE1, IQGAP1, WASF3, CCSAP, CEP120, CLIP1, TMSB4X, MTSS1, PAK1, MAPRE2, TRAF3IP1, IQGAP2, MAP1S, PHLDB2, SENP6, ADD1, ARFIP1, BAIAP2L1, SLAIN2, ARPIN, SSH2, CAMSAP1, ARHGAP18, GSK3B, WASF1
GO:0022900_electron_transport_chain	-0.171	-0.332	0.344	0.336	ENSECAG00000029282, ENSECAG00000013738, ENSECAG00000012512, ENSECAG00000009780, ENSECAG00000011722, ENSECAG00000011808, ENSECAG00000028274, ENSECAG00000007968, ENSECAG00000021690	UQCRQ, SLC25A13, COX6A1, UQCRB, COX4I1, SLC25A22, NDUFB6, COX5B, NDUFS6
GO:0022904_respiratory_electron_transport_chain	-0.171	-0.332	0.344	0.336	ENSECAG00000029282, ENSECAG00000013738, ENSECAG00000012512, ENSECAG00000009780, ENSECAG00000011722, ENSECAG00000011808, ENSECAG00000028274, ENSECAG00000007968, ENSECAG00000021690	UQCRQ, SLC25A13, COX6A1, UQCRB, COX4I1, SLC25A22, NDUFB6, COX5B, NDUFS6
GO:0051648_vesicle_localization	0.223	-0.0446	0.336	0.336	ENSECAG00000019646, ENSECAG00000015360, ENSECAG00000010951, ENSECAG00000015237, ENSECAG00000023433, ENSECAG00000008104, ENSECAG00000012044, ENSECAG00000009730, ENSECAG00000011655, ENSECAG00000022693, ENSECAG00000014459, ENSECAG00000014240, ENSECAG00000023865, ENSECAG00000022058, ENSECAG00000011438, ENSECAG00000020710, ENSECAG00000022600, ENSECAG00000019264, ENSECAG00000024050, ENSECAG00000009886,…	AHI1, IFT122, DNAAF4, PIBF1, TMEM231, DYNLL1, PTPDC1, SAR1A, PCM1, SEPTIN7, ARL13B, IFT46, RAB11A, ODF2L, IFT57, DRC1, SPAG1, PICALM, SCLT1, TRAF3IP1, CEP89, KIF5B, CEP20, MYO5A, IQCB1, OFD1, SEPTIN2, DTNBP1, BBS5, CENPJ, ODF2, IFT74, BBS7, HYLS1, CEP41, CCDC66, MYO6, CFAP20, IFT88, FBXW8, ENTR1
GO:0051650_establishment_of_vesicle_localization	0.223	-0.0446	0.336	0.336	ENSECAG00000019646, ENSECAG00000015360, ENSECAG00000010951, ENSECAG00000015237, ENSECAG00000023433, ENSECAG00000008104, ENSECAG00000012044, ENSECAG00000009730, ENSECAG00000011655, ENSECAG00000022693, ENSECAG00000014459, ENSECAG00000014240, ENSECAG00000023865, ENSECAG00000022058, ENSECAG00000011438, ENSECAG00000020710, ENSECAG00000022600, ENSECAG00000019264, ENSECAG00000024050, ENSECAG00000009886,…	AHI1, IFT122, DNAAF4, PIBF1, TMEM231, DYNLL1, PTPDC1, SAR1A, PCM1, SEPTIN7, ARL13B, IFT46, RAB11A, ODF2L, IFT57, DRC1, SPAG1, PICALM, SCLT1, TRAF3IP1, CEP89, KIF5B, CEP20, MYO5A, IQCB1, OFD1, SEPTIN2, DTNBP1, BBS5, CENPJ, ODF2, IFT74, BBS7, HYLS1, CEP41, CCDC66, MYO6, CFAP20, IFT88, FBXW8, ENTR1
GO:0006302_double-strand_break_repair	0.0978	0.04	0.296	0.336	ENSECAG00000011567, ENSECAG00000010827, ENSECAG00000013845, ENSECAG00000018233, ENSECAG00000024392, ENSECAG00000020269, ENSECAG00000022964, ENSECAG00000018454, ENSECAG00000016392, ENSECAG00000008840, ENSECAG00000014368, ENSECAG00000012231, ENSECAG00000007003, ENSECAG00000010922, ENSECAG00000019809, ENSECAG00000037284, ENSECAG00000019631, ENSECAG00000024215, ENSECAG00000018676, ENSECAG00000010731,…	UIMC1, TEX15, HUS1, NIPBL, BRIP1, XRCC4, CDC7, RBBP8, RAD21, MCM6, MCM5, DEK, RNF168, RAD50, CGAS, WDR70, MCM2, GINS2, RAD52, DCLRE1A, TDP1, GINS4, NUCKS1, NABP1, PALB2, BRCA2, RAD51AP1, OTUB1, ACTR8, REV3L
GO:0032989_cellular_component_morphogenesis	0.383	-0.163	0.272	0.336	ENSECAG00000019993, ENSECAG00000007560, ENSECAG00000023274, ENSECAG00000009111, ENSECAG00000011669, ENSECAG00000005815, ENSECAG00000010553, ENSECAG00000020281, ENSECAG00000017840, ENSECAG00000022329, ENSECAG00000009523, ENSECAG00000008709, ENSECAG00000008730, ENSECAG00000022405, ENSECAG00000000558, ENSECAG00000000529, ENSECAG00000015935, ENSECAG00000000751, ENSECAG00000021186, ENSECAG00000004904,…	KALRN, FXR1, LAMA5, RUFY3, TNN, LLPH, NGF, PAK2, PAK1, LRRC4C, ISL2, LMOD3, MAP4K4, NOTCH1, KIF5B, MAP1S, ACTB, NEDD4L, FHOD3, SMO, TIAM1, ACTB, FMR1, CSRP2, ENAH, TAOK3
GO:0031124_mRNA_3'-end_processing	0.154	0.158	0.4	0.344	ENSECAG00000009859, ENSECAG00000024732, ENSECAG00000021027, ENSECAG00000012606, ENSECAG00000023935, ENSECAG00000011689, ENSECAG00000000691, ENSECAG00000018683, ENSECAG00000040006, ENSECAG00000019415	PAPOLG, EXOSC9, PAPOLA, EXOSC8, CPSF2, SLBP, WDR33, PCF11, SLBP2, FIP1L1
GO:0002376_immune_system_process	0.223	0.112	0.36	0.344	ENSECAG00000006101, ENSECAG00000013300, ENSECAG00000006518, ENSECAG00000023011, ENSECAG00000011917, ENSECAG00000007205, ENSECAG00000024201, ENSECAG00000023517, ENSECAG00000019809, ENSECAG00000003277, ENSECAG00000014473, ENSECAG00000018810, ENSECAG00000012844, ENSECAG00000004288, ENSECAG00000010789, ENSECAG00000018673, ENSECAG00000011541, ENSECAG00000023771, ENSECAG00000015732, ENSECAG00000008678,…	ZBTB39, CXCL10, SLC39A10, RIPK2, DOCK8, ZBTB33, SH2B2, CYRIB, CGAS, REL, SEC14L1, HELLS, TICAM2, CTSV, AKIRIN2, JAK1, PRDX2, BCL6B, IL37, PRDX1, BCL10, ANKRD17, MTURN
GO:0010506_regulation_of_autophagy	-0.0366	-0.11	0.36	0.344	ENSECAG00000005374, ENSECAG00000005729, ENSECAG00000017195, ENSECAG00000020653, ENSECAG00000036783	WAC, RRAGA, NPRL3, TMEM39A, SVIP
GO:0045930_negative_regulation_of_mitotic_cell_cycle	0.387	0.166	0.352	0.344	ENSECAG00000020524, ENSECAG00000014575, ENSECAG00000013845, ENSECAG00000018235, ENSECAG00000009913, ENSECAG00000021452, ENSECAG00000003872, ENSECAG00000018367, ENSECAG00000021453, ENSECAG00000010047, ENSECAG00000012564, ENSECAG00000016773, ENSECAG00000023776, ENSECAG00000017103	MRNIP, RB1, HUS1, AVEN, CDC6, BUB1B, ZNF830, ZWILCH, TICRR, BUB3, BTG4, NABP1, TTK, BUB1
GO:0098876_vesicle-mediated_transport_to_the_plasma_membrane	0.096	0.0507	0.352	0.344	ENSECAG00000013384, ENSECAG00000036345, ENSECAG00000020655, ENSECAG00000022664, ENSECAG00000023865, ENSECAG00000006321, ENSECAG00000011453, ENSECAG00000008168, ENSECAG00000019987, ENSECAG00000019039, ENSECAG00000009566	STX3, SNX12, GOLGA7, SNX3, RAB11A, GOLPH3, CCDC93, EXOC5, GRIPAP1, CNST, GOPC
GO:0006955_immune_response	0.244	0.103	0.344	0.344	ENSECAG00000013300, ENSECAG00000006518, ENSECAG00000023011, ENSECAG00000024201, ENSECAG00000019809, ENSECAG00000003277, ENSECAG00000014473, ENSECAG00000012844, ENSECAG00000004288, ENSECAG00000010789, ENSECAG00000015732, ENSECAG00000025005, ENSECAG00000007125	CXCL10, SLC39A10, RIPK2, SH2B2, CGAS, REL, SEC14L1, TICAM2, CTSV, AKIRIN2, IL37, BCL10, ANKRD17
GO:0110053_regulation_of_actin_filament_organization	0.11	0.0736	0.392	0.352	ENSECAG00000013629, ENSECAG00000024334, ENSECAG00000018435, ENSECAG00000000050, ENSECAG00000009190, ENSECAG00000021545, ENSECAG00000013136, ENSECAG00000022286, ENSECAG00000012734, ENSECAG00000023388, ENSECAG00000015172, ENSECAG00000024764, ENSECAG00000022222	ADD3, CARMIL1, WDR1, WASF3, TMSB4X, MTSS1, ADD1, ARFIP1, BAIAP2L1, ARPIN, SSH2, ARHGAP18, WASF1
GO:0007029_endoplasmic_reticulum_organization	0.105	0.181	0.368	0.352	ENSECAG00000022657, ENSECAG00000020570, ENSECAG00000013265, ENSECAG00000000965, ENSECAG00000021981, ENSECAG00000021359, ENSECAG00000018378, ENSECAG00000023470, ENSECAG00000008769, ENSECAG00000017741	TMEM170A, LMAN1, VAPB, ATG2B, WDR83OS, RTN3, TRAM1, ATL2, VAPA, SEC31A
GO:0055065_metal_ion_homeostasis	0.272	0.235	0.352	0.352	ENSECAG00000008450, ENSECAG00000024327, ENSECAG00000006518, ENSECAG00000012027, ENSECAG00000008683, ENSECAG00000040743, ENSECAG00000016301, ENSECAG00000024623, ENSECAG00000009911, ENSECAG00000007671, ENSECAG00000024593, ENSECAG00000016494, ENSECAG00000008456, ENSECAG00000017771	ATP2B1, FBXL5, SLC39A10, CACNA1E, FTH1, SELENOK, MCUB, ATP1A1, SLC12A7, ATP2A2, SLC35G1, MICU2, SLC39A6, ATP1B1
GO:0051784_negative_regulation_of_nuclear_division	0.38	0.169	0.352	0.352	ENSECAG00000021452, ENSECAG00000011630, ENSECAG00000018367, ENSECAG00000010047, ENSECAG00000023776, ENSECAG00000017103	BUB1B, FBXO5, ZWILCH, BUB3, TTK, BUB1
GO:0007178_transmembrane_receptor_protein_serine/threonine_kinase_signaling_pathway	-0.0658	-0.282	0.352	0.352	ENSECAG00000023233, ENSECAG00000011935, ENSECAG00000000138, ENSECAG00000013706, ENSECAG00000036584, ENSECAG00000024602, ENSECAG00000020015, ENSECAG00000015053, ENSECAG00000022649, ENSECAG00000015132, ENSECAG00000020259, ENSECAG00000018506, ENSECAG00000021088, ENSECAG00000011686, ENSECAG00000018189, ENSECAG00000018005	BMP15, SMURF2, ACVR2A, SMAD6, SKOR1, RNF111, BMP6, SDCBP, SMAD1, SMAD2, SMAD3, SMAD5, GDF9, ACVR1B, TWSG1, PMEPA1
GO:0051298_centrosome_duplication	0.386	0.339	0.344	0.352	ENSECAG00000010318, ENSECAG00000010056, ENSECAG00000000796, ENSECAG00000014542, ENSECAG00000021916, ENSECAG00000011152, ENSECAG00000021950, ENSECAG00000006526, ENSECAG00000018114, ENSECAG00000023113, ENSECAG00000008051, ENSECAG00000015563	CEP63, C1H10orf90, CETN2, SPICE1, CEP120, STIL, NPM1, CENPJ, CEP295, SASS6, CEP192, CKAP5
GO:0044262_cellular_carbohydrate_metabolic_process	0.496	0.473	0.32	0.352	ENSECAG00000011728, ENSECAG00000021725, ENSECAG00000035324, ENSECAG00000024698, ENSECAG00000019133, ENSECAG00000016632, ENSECAG00000021206	PYGL, TFDP2, HAS3, INPP1, TIGAR, PPIP5K2, HAS2
GO:0045944_positive_regulation_of_transcription_by_RNA_polymerase_II	0.146	-0.198	0.376	0.36	ENSECAG00000024766, ENSECAG00000022110, ENSECAG00000030438, ENSECAG00000014570, ENSECAG00000011391, ENSECAG00000006280, ENSECAG00000007955, ENSECAG00000000193, ENSECAG00000024187, ENSECAG00000011120, ENSECAG00000014898, ENSECAG00000017235, ENSECAG00000013436, ENSECAG00000020777, ENSECAG00000014505, ENSECAG00000023738, ENSECAG00000000466, ENSECAG00000009523, ENSECAG00000042372, ENSECAG00000021950,…	CREBBP, ASXL1, BRD4, CDK7, TET3, LPIN2, HNRNPU, SSBP3, SMARCA2, THRA, LEO1, MTF1, TCEA1, LMO3, PTOV1, MED10, ELL, ISL2, PTMS, NPM1, MED25, MYBL1, NCOA6, NR1H2, BRDT, AKIRIN2, LDB1, THRAP3, NCOA1, SREBF2, ATAD2, KMT2C, SMARCA5, NFATC2IP, GABPB1, BCLAF1, MED19, SUPT16H, PAXBP1, PPRC1, RNF10, OCLN, LMO1, EP300, ASXL3
GO:0000387_spliceosomal_snRNP_assembly	0.253	0.276	0.368	0.36	ENSECAG00000007824, ENSECAG00000007554, ENSECAG00000013983, ENSECAG00000030680, ENSECAG00000013565, ENSECAG00000023316, ENSECAG00000021318, ENSECAG00000007824, ENSECAG00000000711, ENSECAG00000014373	SNRPD2, GEMIN2, PRPF6, SNRPE, DDX20, SNRPD3, PRPF8, SNRPD2, COIL, SNRPD1
GO:0055001_muscle_cell_development	0.105	0.137	0.368	0.36	ENSECAG00000008709, ENSECAG00000021777, ENSECAG00000021186, ENSECAG00000019476, ENSECAG00000015606	LMOD3, ACTN4, FHOD3, ACTN1, CSRP2
GO:0045935_positive_regulation_of_nucleobase-containing_compound_metabolic_process	-0.0344	-0.574	0.368	0.36	ENSECAG00000012810, ENSECAG00000024766, ENSECAG00000005798, ENSECAG00000011567, ENSECAG00000014979, ENSECAG00000001582, ENSECAG00000022110, ENSECAG00000005699, ENSECAG00000030438, ENSECAG00000021443, ENSECAG00000014570, ENSECAG00000019475, ENSECAG00000011391, ENSECAG00000006280, ENSECAG00000022369, ENSECAG00000021380, ENSECAG00000007955, ENSECAG00000024602, ENSECAG00000000193, ENSECAG00000024187,…	TNKS2, CREBBP, CNOT7, UIMC1, AFAP1L2, CNOT6L, ASXL1, SERTAD3, BRD4, HEATR1, CDK7, YTHDF1, TET3, LPIN2, WBP2, RBMX, HNRNPU, RNF111, SSBP3, SMARCA2, ICE2, THRA, LEO1, YTHDF2, EXOSC9, MTF1, DYRK1A, SAMD4B, NUP85, TCEA1, EDRF1, LMO3, PTOV1, MED10, ELL, ISL2, CNOT3, PTMS, NPM1, EXOSC8, MED30, MED25, MYBL1, NCOA6, KMT2B, NR1H2, BRDT, AKIRIN2, DCPS, LDB1, THRAP3, TIGAR, ARID1A, CTCF, ING1, TNRC6B, NCOA1…
GO:0030509_BMP_signaling_pathway	0.191	0.0211	0.36	0.36	ENSECAG00000023233, ENSECAG00000011935, ENSECAG00000013706, ENSECAG00000036584, ENSECAG00000022649, ENSECAG00000015132, ENSECAG00000020259, ENSECAG00000018506, ENSECAG00000021088, ENSECAG00000018189	BMP15, SMURF2, SMAD6, SKOR1, SMAD1, SMAD2, SMAD3, SMAD5, GDF9, TWSG1
GO:0071772_response_to_BMP	0.191	0.0211	0.36	0.36	ENSECAG00000023233, ENSECAG00000011935, ENSECAG00000013706, ENSECAG00000036584, ENSECAG00000022649, ENSECAG00000015132, ENSECAG00000020259, ENSECAG00000018506, ENSECAG00000021088, ENSECAG00000018189	BMP15, SMURF2, SMAD6, SKOR1, SMAD1, SMAD2, SMAD3, SMAD5, GDF9, TWSG1
GO:0071773_cellular_response_to_BMP_stimulus	0.191	0.0211	0.36	0.36	ENSECAG00000023233, ENSECAG00000011935, ENSECAG00000013706, ENSECAG00000036584, ENSECAG00000022649, ENSECAG00000015132, ENSECAG00000020259, ENSECAG00000018506, ENSECAG00000021088, ENSECAG00000018189	BMP15, SMURF2, SMAD6, SKOR1, SMAD1, SMAD2, SMAD3, SMAD5, GDF9, TWSG1
GO:0007098_centrosome_cycle	0.279	0.236	0.352	0.36	ENSECAG00000010318, ENSECAG00000010056, ENSECAG00000011655, ENSECAG00000000796, ENSECAG00000014542, ENSECAG00000021916, ENSECAG00000009294, ENSECAG00000011152, ENSECAG00000021950, ENSECAG00000006526, ENSECAG00000004593, ENSECAG00000018114, ENSECAG00000023113, ENSECAG00000008051, ENSECAG00000015563	CEP63, C1H10orf90, PCM1, CETN2, SPICE1, CEP120, PARD6B, STIL, NPM1, CENPJ, HAUS3, CEP295, SASS6, CEP192, CKAP5
GO:0010972_negative_regulation_of_G2/M_transition_of_mitotic_cell_cycle	0.333	0.199	0.344	0.36	ENSECAG00000020524, ENSECAG00000013845, ENSECAG00000018235, ENSECAG00000009913, ENSECAG00000003872, ENSECAG00000021453	MRNIP, HUS1, AVEN, CDC6, ZNF830, TICRR
GO:1902750_negative_regulation_of_cell_cycle_G2/M_phase_transition	0.333	0.199	0.344	0.36	ENSECAG00000020524, ENSECAG00000013845, ENSECAG00000018235, ENSECAG00000009913, ENSECAG00000003872, ENSECAG00000021453	MRNIP, HUS1, AVEN, CDC6, ZNF830, TICRR
GO:0000902_cell_morphogenesis	0.204	-0.271	0.304	0.36	ENSECAG00000022262, ENSECAG00000019993, ENSECAG00000018333, ENSECAG00000007560, ENSECAG00000007187, ENSECAG00000023274, ENSECAG00000009111, ENSECAG00000011669, ENSECAG00000008303, ENSECAG00000004842, ENSECAG00000005815, ENSECAG00000012900, ENSECAG00000011111, ENSECAG00000010553, ENSECAG00000020281, ENSECAG00000017840, ENSECAG00000022329, ENSECAG00000009523, ENSECAG00000008730, ENSECAG00000022405,…	BRWD1, KALRN, EZR, FXR1, BRWD3, LAMA5, RUFY3, TNN, LAMB1, CDH10, LLPH, MSN, FMNL2, NGF, PAK2, PAK1, LRRC4C, ISL2, MAP4K4, NOTCH1, KIF5B, MAP1S, FRYL, ACTB, NEDD4L, SMO, CDH3, CAP1, TIAM1, ACTB, FMR1, UNK, RDX, ENAH, TAOK3
GO:1902850_microtubule_cytoskeleton_organization_involved_in_mitosis	0.285	0.282	0.4	0.368	ENSECAG00000023961, ENSECAG00000009163, ENSECAG00000006607, ENSECAG00000016495, ENSECAG00000017906, ENSECAG00000021391, ENSECAG00000007955, ENSECAG00000005178, ENSECAG00000006869, ENSECAG00000014542, ENSECAG00000009559, ENSECAG00000011152, ENSECAG00000010859, ENSECAG00000022136, ENSECAG00000006712, ENSECAG00000008051, ENSECAG00000027735, ENSECAG00000023455, ENSECAG00000015563, ENSECAG00000008434	AURKA, NUF2, KIF11, NUSAP1, PRC1, CLASP1, HNRNPU, CCSAP, MAP9, SPICE1, INSC, STIL, KIF4A, DCTN6, WRAP73, CEP192, TUBG1, NUMA1, CKAP5, EFHC1
GO:0033044_regulation_of_chromosome_organization	-0.0608	-0.283	0.392	0.368	ENSECAG00000012810, ENSECAG00000016925, ENSECAG00000007955, ENSECAG00000007006, ENSECAG00000021452, ENSECAG00000022565, ENSECAG00000010736, ENSECAG00000018367, ENSECAG00000021001, ENSECAG00000010047, ENSECAG00000008647, ENSECAG00000009651, ENSECAG00000023776, ENSECAG00000017103	TNKS2, WAPL, HNRNPU, ANAPC1, BUB1B, ATF7IP2, RESF1, ZWILCH, SENP6, BUB3, POT1, TASOR, TTK, BUB1
GO:0045786_negative_regulation_of_cell_cycle	0.28	0.068	0.368	0.368	ENSECAG00000021147, ENSECAG00000020524, ENSECAG00000014575, ENSECAG00000013845, ENSECAG00000018235, ENSECAG00000009913, ENSECAG00000012903, ENSECAG00000021452, ENSECAG00000003634, ENSECAG00000004590, ENSECAG00000011630, ENSECAG00000003872, ENSECAG00000018367, ENSECAG00000021453, ENSECAG00000009760, ENSECAG00000010047, ENSECAG00000012564, ENSECAG00000016773, ENSECAG00000023776, ENSECAG00000017103	ATM, MRNIP, RB1, HUS1, AVEN, CDC6, WDR76, BUB1B, RHNO1, TIPIN, FBXO5, ZNF830, ZWILCH, TICRR, GMNN, BUB3, BTG4, NABP1, TTK, BUB1
GO:0098656_anion_transmembrane_transport	-0.241	-0.194	0.368	0.368	ENSECAG00000014112, ENSECAG00000013480, ENSECAG00000022060, ENSECAG00000013738, ENSECAG00000009911, ENSECAG00000028359, ENSECAG00000011808	SLC20A1, ANO4, SLC25A32, SLC25A13, SLC12A7, SLC25A5, SLC25A22
GO:0033554_cellular_response_to_stress	0.232	-0.0109	0.344	0.368	ENSECAG00000021147, ENSECAG00000011567, ENSECAG00000012967, ENSECAG00000024205, ENSECAG00000010827, ENSECAG00000015499, ENSECAG00000020524, ENSECAG00000014582, ENSECAG00000023670, ENSECAG00000014072, ENSECAG00000007560, ENSECAG00000012970, ENSECAG00000013845, ENSECAG00000023916, ENSECAG00000022979, ENSECAG00000018233, ENSECAG00000009962, ENSECAG00000008011, ENSECAG00000024392, ENSECAG00000013971,…	ATM, UIMC1, PRKAA2, HSPA5, TEX15, XPC, MRNIP, UFL1, CUL4B, PMS2, FXR1, FAF2, HUS1, SPRTN, MPG, NIPBL, MSH3, MLH3, BRIP1, ATG5, PRIMPOL, HSPA2, XRCC4, IGF1R, CETN2, REV1, KLHDC10, EPAS1, CDC7, RRAGA, RBBP8, APEX2, HSP90AB1, PPP4R3B, DERL2, PARG, FANCL, RAD21, MCM6, WDR76, HSPA8, MCM5, DEK, CANX, RNF168, RAD50, HSP90AB1, ATG14, CGAS, NPRL3, PDIA6, RNF175, REL, WDR70, NEIL3, MCM2, RFC4, INIP, TRAF6,…
GO:0048519_negative_regulation_of_biological_process	0.0325	-0.631	0.344	0.368	ENSECAG00000017894, ENSECAG00000008992, ENSECAG00000005798, ENSECAG00000021147, ENSECAG00000013186, ENSECAG00000020286, ENSECAG00000001582, ENSECAG00000021358, ENSECAG00000020524, ENSECAG00000011357, ENSECAG00000018988, ENSECAG00000024605, ENSECAG00000012780, ENSECAG00000013629, ENSECAG00000011935, ENSECAG00000017022, ENSECAG00000006101, ENSECAG00000011063, ENSECAG00000028670, ENSECAG00000010812,…	CKAP2, HYPK, CNOT7, ATM, WWC3, BIRC7, CNOT6L, SFRP1, MRNIP, GATAD2B, XRN2, SIN3A, CBX3, ADD3, SMURF2, UPF2, ZBTB39, MOV10L1, DPPA3, EDC4, BIRC6, FXR1, PDE3B, PIM3, XIAP, RB1, ZNRF3, YTHDF1, HUS1, ZCCHC17, ZP4, APC, AVEN, SVBP, HMX1, MTA3, RUNX1T1, HNRNPU, SKOR1, SUDS3, ZBTB33, NCOR1, N4BP2L2, MIER1, ZP2, ID3, BIRC5, KCTD13, LEPROT, THRA, DCAF5, PIWIL1, YTHDF2, WWC1, CIART, ZC3H7A, EXOSC9, SAP18, …
GO:0051246_regulation_of_protein_metabolic_process	-0.00885	-0.666	0.304	0.368	ENSECAG00000021289, ENSECAG00000005798, ENSECAG00000020286, ENSECAG00000023233, ENSECAG00000001582, ENSECAG00000014582, ENSECAG00000028965, ENSECAG00000006638, ENSECAG00000007560, ENSECAG00000020071, ENSECAG00000019475, ENSECAG00000025118, ENSECAG00000017911, ENSECAG00000021385, ENSECAG00000009003, ENSECAG00000016020, ENSECAG00000019655, ENSECAG00000016023, ENSECAG00000008466, ENSECAG00000019466,…	CCNE1, CNOT7, BIRC7, BMP15, CNOT6L, UFL1, NEDD8, CASP8AP2, FXR1, XIAP, YTHDF1, TADA2A, PDCD10, HUWE1, APC, CCNJ, SVBP, CCNO, BIRC5, ARIH1, BMP6, YTHDF2, EXOSC9, SAMD4B, CCNE2, SDCBP, NECAB2, PPP6R3, NGF, PARG, RNF34, CTR9, PRRC1, CCNF, UACA, CNOT3, CCNB3, CCNB2, EXOSC8, CCNI, WDR70, CNBP, MOB1B, CPEB1, TRIB2, CCNH, RACK1, UPF3A, SPOPL, DCPS, FGF16, SPOP, SH3RF1, CCNB1, CSNK2B, TNRC6B, DTNBP1, CCN…
GO:0018209_peptidyl-serine_modification	-0.269	-0.308	0.416	0.376	ENSECAG00000024916, ENSECAG00000008264, ENSECAG00000014371, ENSECAG00000004882, ENSECAG00000008005, ENSECAG00000024965, ENSECAG00000022964, ENSECAG00000010553, ENSECAG00000019890, ENSECAG00000025008, ENSECAG00000000735, ENSECAG00000019198, ENSECAG00000000626, ENSECAG00000016601, ENSECAG00000008744, ENSECAG00000013735, ENSECAG00000023776, ENSECAG00000021408	PKN2, AKT1, CSNK1G2, CSNK1A1, AKT2, DYRK1A, CDC7, NGF, VRK1, MKNK2, MKNK1, CSNK1G3, PDPK1, NDUFA9, UHMK1, HPF1, TTK, VRK2
GO:0016579_protein_deubiquitination	0.255	0.314	0.4	0.376	ENSECAG00000011567, ENSECAG00000007240, ENSECAG00000009006, ENSECAG00000016116, ENSECAG00000022272, ENSECAG00000012988, ENSECAG00000011151, ENSECAG00000009628, ENSECAG00000017587, ENSECAG00000010819, ENSECAG00000023565, ENSECAG00000006611, ENSECAG00000012657, ENSECAG00000007234, ENSECAG00000005549, ENSECAG00000020838, ENSECAG00000018570, ENSECAG00000019794, ENSECAG00000033949	UIMC1, CYLD, USP46, USP36, USP34, UCHL5, USP1, USP7, ZRANB1, OTUD5, ENY2, USP8, USP48, SPATA2, USP9X, USP47, USP10, OTUD3, OTUB1
GO:0051494_negative_regulation_of_cytoskeleton_organization	0.282	0.184	0.392	0.376	ENSECAG00000017894, ENSECAG00000013629, ENSECAG00000009003, ENSECAG00000009190, ENSECAG00000013136, ENSECAG00000023388, ENSECAG00000015172, ENSECAG00000017095	CKAP2, ADD3, APC, TMSB4X, ADD1, ARPIN, SSH2, CAMSAP1
GO:1902904_negative_regulation_of_supramolecular_fiber_organization	0.282	0.184	0.392	0.376	ENSECAG00000017894, ENSECAG00000013629, ENSECAG00000009003, ENSECAG00000009190, ENSECAG00000013136, ENSECAG00000023388, ENSECAG00000015172, ENSECAG00000017095	CKAP2, ADD3, APC, TMSB4X, ADD1, ARPIN, SSH2, CAMSAP1
GO:0010563_negative_regulation_of_phosphorus_metabolic_process	-0.0781	-0.291	0.384	0.376	ENSECAG00000019133, ENSECAG00000012588, ENSECAG00000017165, ENSECAG00000007717, ENSECAG00000024842, ENSECAG00000018005, ENSECAG00000014300	TIGAR, DTNBP1, ENSA, URI1, SH3BP5, PMEPA1, CBLB
GO:0045936_negative_regulation_of_phosphate_metabolic_process	-0.0781	-0.291	0.384	0.376	ENSECAG00000019133, ENSECAG00000012588, ENSECAG00000017165, ENSECAG00000007717, ENSECAG00000024842, ENSECAG00000018005, ENSECAG00000014300	TIGAR, DTNBP1, ENSA, URI1, SH3BP5, PMEPA1, CBLB
GO:0005975_carbohydrate_metabolic_process	0.259	0.252	0.376	0.376	ENSECAG00000011728, ENSECAG00000021725, ENSECAG00000016568, ENSECAG00000011754, ENSECAG00000035324, ENSECAG00000024698, ENSECAG00000019133, ENSECAG00000007644, ENSECAG00000016632, ENSECAG00000021206	PYGL, TFDP2, CS, RPIA, HAS3, INPP1, TIGAR, PKM, PPIP5K2, HAS2
GO:0001817_regulation_of_cytokine_production	0.165	-0.0852	0.352	0.376	ENSECAG00000014979, ENSECAG00000006101, ENSECAG00000007205, ENSECAG00000019809, ENSECAG00000014473, ENSECAG00000012844, ENSECAG00000023771	AFAP1L2, ZBTB39, ZBTB33, CGAS, SEC14L1, TICAM2, BCL6B
GO:0140694_non-membrane-bounded_organelle_assembly	0.32	0.343	0.408	0.384	ENSECAG00000010318, ENSECAG00000021065, ENSECAG00000020174, ENSECAG00000010056, ENSECAG00000006607, ENSECAG00000017906, ENSECAG00000009738, ENSECAG00000021391, ENSECAG00000007955, ENSECAG00000010222, ENSECAG00000018172, ENSECAG00000005178, ENSECAG00000016281, ENSECAG00000000796, ENSECAG00000006869, ENSECAG00000014542, ENSECAG00000021916, ENSECAG00000017121, ENSECAG00000008709, ENSECAG00000012845,…	CEP63, RPL5, CENPW, C1H10orf90, KIF11, PRC1, RPS19, CLASP1, HNRNPU, MAPRE1, MRPL22, CCSAP, LSM14A, CETN2, MAP9, SPICE1, CEP120, RPF2, LMOD3, MAPRE2, WRAP73, RPSA, ATXN2, HAUS1, RPLP0, BRIX1, SENP6, FHOD3, CENPJ, LSM14B, HAUS3, CEP295, RPL10, SASS6, CSRP2, CENPC, CEP192, RPSA, ATXN2L
GO:0031056_regulation_of_histone_modification	0.211	0.127	0.4	0.384	ENSECAG00000025118, ENSECAG00000022081, ENSECAG00000010969, ENSECAG00000037284, ENSECAG00000033949	TADA2A, PARG, CTR9, WDR70, OTUB1
GO:0070925_organelle_assembly	0.239	0.0658	0.4	0.384	ENSECAG00000019646, ENSECAG00000020144, ENSECAG00000015360, ENSECAG00000006545, ENSECAG00000010951, ENSECAG00000010318, ENSECAG00000015237, ENSECAG00000018333, ENSECAG00000021065, ENSECAG00000020174, ENSECAG00000010056, ENSECAG00000023433, ENSECAG00000008104, ENSECAG00000006607, ENSECAG00000012044, ENSECAG00000017906, ENSECAG00000009738, ENSECAG00000013971, ENSECAG00000021391, ENSECAG00000007955,…	AHI1, UBXN2A, IFT122, NSFL1C, DNAAF4, CEP63, PIBF1, EZR, RPL5, CENPW, C1H10orf90, TMEM231, DYNLL1, KIF11, PTPDC1, PRC1, RPS19, ATG5, CLASP1, HNRNPU, MAPRE1, PCM1, SEPTIN7, WIPI2, MRPL22, ATG12, CCSAP, ARL13B, LSM14A, CETN2, MAP9, TBC1D14, IFT46, SPICE1, CEP120, ATG3, ATG2B, MSN, ODF2L, IFT57, RPF2, DRC1, SPAG1, LMOD3, ATG14, SCLT1, MAPRE2, WRAP73, TRAF3IP1, CEP89, RPSA, ATG16L1, ATXN2, HAUS1, RPL…
GO:0006900_vesicle_budding_from_membrane	-0.278	-0.238	0.384	0.384	ENSECAG00000005207, ENSECAG00000015766, ENSECAG00000020824, ENSECAG00000015853, ENSECAG00000014371, ENSECAG00000009730, ENSECAG00000012054, ENSECAG00000016188, ENSECAG00000006321, ENSECAG00000020425, ENSECAG00000019264, ENSECAG00000019198, ENSECAG00000007262, ENSECAG00000018309, ENSECAG00000022080, ENSECAG00000014737, ENSECAG00000007134, ENSECAG00000025087, ENSECAG00000007129, ENSECAG00000022623,…	RAB4A, SNCA, EPS15, SORT1, CSNK1G2, SAR1A, ITSN1, REPS1, GOLPH3, ITSN2, PICALM, CSNK1G3, EEA1, SEC24D, LAMTOR1, HEATR5B, AP2A1, SEC23B, LRP6, SNX9, MYO6, CD320, DNAJC13, CLINT1, SEC31A, CLTC
GO:0050779_RNA_destabilization	-0.494	-0.842	0.384	0.384	ENSECAG00000005798, ENSECAG00000001582, ENSECAG00000019475, ENSECAG00000023108, ENSECAG00000024732, ENSECAG00000015551, ENSECAG00000023181, ENSECAG00000012606, ENSECAG00000012956, ENSECAG00000009759	CNOT7, CNOT6L, YTHDF1, YTHDF2, EXOSC9, SAMD4B, CNOT3, EXOSC8, DCPS, TNRC6B
GO:0061014_positive_regulation_of_mRNA_catabolic_process	-0.494	-0.842	0.384	0.384	ENSECAG00000005798, ENSECAG00000001582, ENSECAG00000019475, ENSECAG00000023108, ENSECAG00000024732, ENSECAG00000015551, ENSECAG00000023181, ENSECAG00000012606, ENSECAG00000012956, ENSECAG00000009759	CNOT7, CNOT6L, YTHDF1, YTHDF2, EXOSC9, SAMD4B, CNOT3, EXOSC8, DCPS, TNRC6B
GO:0061157_mRNA_destabilization	-0.494	-0.842	0.384	0.384	ENSECAG00000005798, ENSECAG00000001582, ENSECAG00000019475, ENSECAG00000023108, ENSECAG00000024732, ENSECAG00000015551, ENSECAG00000023181, ENSECAG00000012606, ENSECAG00000012956, ENSECAG00000009759	CNOT7, CNOT6L, YTHDF1, YTHDF2, EXOSC9, SAMD4B, CNOT3, EXOSC8, DCPS, TNRC6B
GO:0072359_circulatory_system_development	0.473	0.436	0.376	0.384	ENSECAG00000038178, ENSECAG00000001445, ENSECAG00000007640, ENSECAG00000007687, ENSECAG00000028820, ENSECAG00000010284, ENSECAG00000009828, ENSECAG00000019637, ENSECAG00000021186, ENSECAG00000015752	HEY2, CHD7, KDM6A, PTPN14, HEY1, PKNOX1, KDM6B, LGALS12, FHOD3, PDCL3
GO:0044774_mitotic_DNA_integrity_checkpoint_signaling	0.14	-0.0054	0.376	0.384	ENSECAG00000020524, ENSECAG00000013845, ENSECAG00000009913, ENSECAG00000003872, ENSECAG00000021453	MRNIP, HUS1, CDC6, ZNF830, TICRR
GO:0044818_mitotic_G2/M_transition_checkpoint	0.14	-0.0054	0.376	0.384	ENSECAG00000020524, ENSECAG00000013845, ENSECAG00000009913, ENSECAG00000003872, ENSECAG00000021453	MRNIP, HUS1, CDC6, ZNF830, TICRR
GO:0051347_positive_regulation_of_transferase_activity	0.0969	-0.0595	0.376	0.384	ENSECAG00000017911, ENSECAG00000021238, ENSECAG00000024659, ENSECAG00000011752, ENSECAG00000015006, ENSECAG00000021365	PDCD10, IGF1R, PRRC1, ATG14, FGFR1, DCUN1D1
GO:0045859_regulation_of_protein_kinase_activity	0.105	-0.1	0.376	0.384	ENSECAG00000021289, ENSECAG00000017911, ENSECAG00000016020, ENSECAG00000016023, ENSECAG00000020270, ENSECAG00000024659, ENSECAG00000019369, ENSECAG00000008787, ENSECAG00000014813, ENSECAG00000020161, ENSECAG00000010405, ENSECAG00000001853, ENSECAG00000015806, ENSECAG00000012588, ENSECAG00000014113, ENSECAG00000023790, ENSECAG00000024842, ENSECAG00000014300	CCNE1, PDCD10, CCNJ, CCNO, CCNE2, PRRC1, CCNF, CCNB3, CCNB2, CCNI, TRIB2, CCNH, CCNB1, DTNBP1, CCNG2, MNAT1, SH3BP5, CBLB
GO:0006873_cellular_ion_homeostasis	0.131	0.109	0.36	0.384	ENSECAG00000008450, ENSECAG00000023584, ENSECAG00000006518, ENSECAG00000012027, ENSECAG00000008683, ENSECAG00000000767, ENSECAG00000040743, ENSECAG00000016301, ENSECAG00000024623, ENSECAG00000007671, ENSECAG00000024593, ENSECAG00000016494, ENSECAG00000014216, ENSECAG00000008456, ENSECAG00000017771	ATP2B1, DMXL1, SLC39A10, CACNA1E, FTH1, SLC4A7, SELENOK, MCUB, ATP1A1, ATP2A2, SLC35G1, MICU2, ATP6AP1, SLC39A6, ATP1B1
GO:0030003_cellular_cation_homeostasis	0.131	0.109	0.36	0.384	ENSECAG00000008450, ENSECAG00000023584, ENSECAG00000006518, ENSECAG00000012027, ENSECAG00000008683, ENSECAG00000000767, ENSECAG00000040743, ENSECAG00000016301, ENSECAG00000024623, ENSECAG00000007671, ENSECAG00000024593, ENSECAG00000016494, ENSECAG00000014216, ENSECAG00000008456, ENSECAG00000017771	ATP2B1, DMXL1, SLC39A10, CACNA1E, FTH1, SLC4A7, SELENOK, MCUB, ATP1A1, ATP2A2, SLC35G1, MICU2, ATP6AP1, SLC39A6, ATP1B1
GO:0055082_cellular_chemical_homeostasis	0.131	0.109	0.36	0.384	ENSECAG00000008450, ENSECAG00000023584, ENSECAG00000006518, ENSECAG00000012027, ENSECAG00000008683, ENSECAG00000000767, ENSECAG00000040743, ENSECAG00000016301, ENSECAG00000024623, ENSECAG00000007671, ENSECAG00000024593, ENSECAG00000016494, ENSECAG00000014216, ENSECAG00000008456, ENSECAG00000017771	ATP2B1, DMXL1, SLC39A10, CACNA1E, FTH1, SLC4A7, SELENOK, MCUB, ATP1A1, ATP2A2, SLC35G1, MICU2, ATP6AP1, SLC39A6, ATP1B1
GO:0001934_positive_regulation_of_protein_phosphorylation	0.00772	-0.661	0.304	0.384	ENSECAG00000023233, ENSECAG00000007560, ENSECAG00000017911, ENSECAG00000020015, ENSECAG00000015053, ENSECAG00000010553, ENSECAG00000024659, ENSECAG00000023795, ENSECAG00000022567, ENSECAG00000031442, ENSECAG00000021088, ENSECAG00000032767	BMP15, FXR1, PDCD10, BMP6, SDCBP, NGF, PRRC1, MOB1B, RACK1, FGF16, GDF9, FMR1
GO:0051050_positive_regulation_of_transport	0.36	0.316	0.408	0.392	ENSECAG00000008013, ENSECAG00000018333, ENSECAG00000024021, ENSECAG00000009730, ENSECAG00000012900, ENSECAG00000019039, ENSECAG00000023501, ENSECAG00000002920	NMB, EZR, CADPS2, SAR1A, MSN, CNST, WNK1, RDX
GO:0061024_membrane_organization	-0.214	-0.224	0.408	0.392	ENSECAG00000005207, ENSECAG00000023961, ENSECAG00000015766, ENSECAG00000013384, ENSECAG00000020144, ENSECAG00000000354, ENSECAG00000006545, ENSECAG00000020824, ENSECAG00000012391, ENSECAG00000015853, ENSECAG00000024272, ENSECAG00000005768, ENSECAG00000019725, ENSECAG00000024021, ENSECAG00000021002, ENSECAG00000017458, ENSECAG00000016551, ENSECAG00000014117, ENSECAG00000016495, ENSECAG00000016134,…	RAB4A, AURKA, SNCA, STX3, UBXN2A, PLK2, NSFL1C, EPS15, ROMO1, SORT1, RIMS1, SEPTIN11, SYT11, CADPS2, ROCK1, BNIP3, RAB13, VAMP7, NUSAP1, RAB11FIP1, CSNK1G2, SAR1A, ANXA11, ITSN1, SEPTIN7, SUN2, VAPB, MAP9, RAB11A, RALA, REPS1, GOLPH3, MTSS1, WDR83OS, ITSN2, PICALM, STX7, RAB11FIP2, CSNK1G3, RAP1A, EEA1, UNC13C, SEC24D, BNIP3L, LAMTOR1, CERT1, SEPTIN2, ECT2, PLK1, HEATR5B, DTNBP1, GOSR1, AP2A1, EX…
GO:0048585_negative_regulation_of_response_to_stimulus	-0.0457	-0.346	0.408	0.392	ENSECAG00000021147, ENSECAG00000021358, ENSECAG00000011935, ENSECAG00000024797, ENSECAG00000011694, ENSECAG00000009003, ENSECAG00000036584, ENSECAG00000012915, ENSECAG00000016346, ENSECAG00000022379, ENSECAG00000016261, ENSECAG00000019809, ENSECAG00000017195, ENSECAG00000013680, ENSECAG00000014473, ENSECAG00000011461, ENSECAG00000019560, ENSECAG00000016102, ENSECAG00000017118, ENSECAG00000036783,…	ATM, SFRP1, SMURF2, PDE3B, ZNRF3, APC, SKOR1, KCTD13, LEPROT, RNF34, UACA, CGAS, NPRL3, TLE1, SEC14L1, ARMC10, KCTD10, CHD8, TLE7, SVIP, RFFL, DUSP1, CAAP1, TSC1, EYA1, OTUB1, PPM1B, PMEPA1, GSK3B, CBLB
GO:0000819_sister_chromatid_segregation	0.17	0.0821	0.392	0.392	ENSECAG00000016155, ENSECAG00000016913, ENSECAG00000016925, ENSECAG00000012899, ENSECAG00000009163, ENSECAG00000016495, ENSECAG00000018233, ENSECAG00000017906, ENSECAG00000007955, ENSECAG00000015641, ENSECAG00000023019, ENSECAG00000007006, ENSECAG00000007470, ENSECAG00000019776, ENSECAG00000016392, ENSECAG00000021452, ENSECAG00000006712, ENSECAG00000015871, ENSECAG00000015746, ENSECAG00000018367,…	KIF18A, MEIKIN, WAPL, ESCO2, NUF2, NUSAP1, NIPBL, PRC1, HNRNPU, DSCC1, KIF18B, ANAPC1, NCAPG, SMC1A, RAD21, BUB1B, WRAP73, CDCA8, SMC1B, ZWILCH, STAG1, CCNB1, NCAPD3, PHF13, BUB3, KNSTRN, NCAPH, CENPC, TTK, TOP2A, TUBG1, ESCO1, NCAPG2, BUB1, NDC80
GO:0035556_intracellular_signal_transduction	0.0198	-0.262	0.392	0.392	ENSECAG00000021147, ENSECAG00000012967, ENSECAG00000013186, ENSECAG00000020524, ENSECAG00000007240, ENSECAG00000019993, ENSECAG00000013569, ENSECAG00000017234, ENSECAG00000024797, ENSECAG00000009706, ENSECAG00000015019, ENSECAG00000005374, ENSECAG00000024916, ENSECAG00000013845, ENSECAG00000023011, ENSECAG00000021002, ENSECAG00000008264, ENSECAG00000011700, ENSECAG00000017911, ENSECAG00000015363,…	ATM, PRKAA2, WWC3, MRNIP, CYLD, KALRN, LAMTOR3, ARHGAP17, PDE3B, AKAP13, PIK3CA, WAC, PKN2, HUS1, RIPK2, ROCK1, AKT1, PLCB3, PDCD10, KLHL22, MAPKAP1, GNAS, IGF1R, KCTD13, RCAN3, WWC1, AKT2, KLHDC10, RALA, PPP3CA, RRAGA, TMEM9B, SH2B2, CDC6, PAK2, IRAK2, PAK1, WDR76, BUB1B, UACA, ARHGEF28, MAP4K4, NPRL3, LAMTOR5, REL, SEC14L1, MKNK2, MOB1B, MKNK1, TRAF6, RHNO1, TIPIN, TICAM2, TRIB2, RAP1A, ZNF830,…
GO:0006661_phosphatidylinositol_biosynthetic_process	0.0593	-0.0262	0.384	0.392	ENSECAG00000019837, ENSECAG00000015019, ENSECAG00000006875, ENSECAG00000021699, ENSECAG00000011752, ENSECAG00000033344	PIK3R1, PIK3CA, IP6K2, SOCS7, ATG14, PIK3R3
GO:0046488_phosphatidylinositol_metabolic_process	0.0593	-0.0262	0.384	0.392	ENSECAG00000019837, ENSECAG00000015019, ENSECAG00000006875, ENSECAG00000021699, ENSECAG00000011752, ENSECAG00000033344	PIK3R1, PIK3CA, IP6K2, SOCS7, ATG14, PIK3R3
GO:0046854_phosphatidylinositol_phosphate_biosynthetic_process	0.0593	-0.0262	0.384	0.392	ENSECAG00000019837, ENSECAG00000015019, ENSECAG00000006875, ENSECAG00000021699, ENSECAG00000011752, ENSECAG00000033344	PIK3R1, PIK3CA, IP6K2, SOCS7, ATG14, PIK3R3
GO:0007017_microtubule-based_process	0.35	0.132	0.376	0.392	ENSECAG00000017894, ENSECAG00000019646, ENSECAG00000016155, ENSECAG00000023961, ENSECAG00000014169, ENSECAG00000015360, ENSECAG00000010951, ENSECAG00000010318, ENSECAG00000014631, ENSECAG00000015237, ENSECAG00000000644, ENSECAG00000014536, ENSECAG00000007560, ENSECAG00000010056, ENSECAG00000001468, ENSECAG00000023433, ENSECAG00000014600, ENSECAG00000016288, ENSECAG00000009163, ENSECAG00000008104,…	CKAP2, AHI1, KIF18A, AURKA, CCSER2, IFT122, DNAAF4, CEP63, TUBAL3, PIBF1, MAP7D3, KIF23, FXR1, C1H10orf90, VBP1, TMEM231, TRAK1, SRRD, NUF2, DYNLL1, KIF11, DYNC1LI1, NUSAP1, PTPDC1, PRC1, APC, HOOK3, CLASP1, HNRNPU, HAUS6, MAPRE1, KATNAL1, PCM1, SEPTIN7, MAP7D2, CCSAP, ARL13B, KIF18B, KIF3A, TUBA1C, CETN2, DYNC1I2, MAP9, IFT46, SPICE1, CEP120, CLIP1, TACC1, INSC, TUBE1, ODF2L, PARD6B, IFT57, TOGA…
GO:0051172_negative_regulation_of_nitrogen_compound_metabolic_process	-0.148	-0.854	0.376	0.392	ENSECAG00000005798, ENSECAG00000001582, ENSECAG00000011357, ENSECAG00000024605, ENSECAG00000012780, ENSECAG00000006101, ENSECAG00000028670, ENSECAG00000007560, ENSECAG00000019475, ENSECAG00000025040, ENSECAG00000019655, ENSECAG00000032622, ENSECAG00000023512, ENSECAG00000000178, ENSECAG00000007955, ENSECAG00000036584, ENSECAG00000023366, ENSECAG00000007205, ENSECAG00000006289, ENSECAG00000016028,…	CNOT7, CNOT6L, GATAD2B, SIN3A, CBX3, ZBTB39, DPPA3, FXR1, YTHDF1, ZCCHC17, SVBP, HMX1, MTA3, RUNX1T1, HNRNPU, SKOR1, SUDS3, ZBTB33, NCOR1, N4BP2L2, MIER1, ID3, THRA, YTHDF2, CIART, EXOSC9, SAP18, SAMD4B, BRMS1, H1-3, RNF34, ANGEL2, ZNF684, CNOT3, CGAS, PER2, EXOSC8, DNMT3A, GATAD2A, CPEB1, SMARCE1, NR1H2, CBFA2T2, SYNCRIP, PCGF1, DCPS, LDB1, CHD8, MTA2, TIGAR, SAP130, CTCF, TNRC6B, DTNBP1, SVIP, …
GO:0050804_modulation_of_chemical_synaptic_transmission	0.0735	-0.55	0.328	0.392	ENSECAG00000024272, ENSECAG00000007560, ENSECAG00000011582, ENSECAG00000023111, ENSECAG00000022329, ENSECAG00000016434, ENSECAG00000012588, ENSECAG00000032767, ENSECAG00000019015	RIMS1, FXR1, DLGAP4, CLSTN1, LRRC4C, RAP1A, DTNBP1, FMR1, GRM8
GO:0099177_regulation_of_trans-synaptic_signaling	0.0735	-0.55	0.328	0.392	ENSECAG00000024272, ENSECAG00000007560, ENSECAG00000011582, ENSECAG00000023111, ENSECAG00000022329, ENSECAG00000016434, ENSECAG00000012588, ENSECAG00000032767, ENSECAG00000019015	RIMS1, FXR1, DLGAP4, CLSTN1, LRRC4C, RAP1A, DTNBP1, FMR1, GRM8
GO:1901880_negative_regulation_of_protein_depolymerization	0.173	0.0857	0.408	0.4	ENSECAG00000017894, ENSECAG00000013629, ENSECAG00000009003, ENSECAG00000013136, ENSECAG00000017095	CKAP2, ADD3, APC, ADD1, CAMSAP1
GO:0035082_axoneme_assembly	0.119	-0.142	0.4	0.4	ENSECAG00000019646, ENSECAG00000015360, ENSECAG00000010951, ENSECAG00000015237, ENSECAG00000023433, ENSECAG00000008104, ENSECAG00000012044, ENSECAG00000011655, ENSECAG00000022693, ENSECAG00000014459, ENSECAG00000014240, ENSECAG00000022058, ENSECAG00000011438, ENSECAG00000020710, ENSECAG00000022600, ENSECAG00000024050, ENSECAG00000009886, ENSECAG00000020513, ENSECAG00000016999, ENSECAG00000019106,…	AHI1, IFT122, DNAAF4, PIBF1, TMEM231, DYNLL1, PTPDC1, PCM1, SEPTIN7, ARL13B, IFT46, ODF2L, IFT57, DRC1, SPAG1, SCLT1, TRAF3IP1, CEP89, CEP20, IQCB1, OFD1, SEPTIN2, BBS5, CENPJ, ODF2, IFT74, BBS7, HYLS1, CEP41, CCDC66, CFAP20, IFT88, FBXW8, ENTR1
GO:0035735_intraciliary_transport_involved_in_cilium_assembly	0.119	-0.142	0.4	0.4	ENSECAG00000019646, ENSECAG00000015360, ENSECAG00000010951, ENSECAG00000015237, ENSECAG00000023433, ENSECAG00000008104, ENSECAG00000012044, ENSECAG00000011655, ENSECAG00000022693, ENSECAG00000014459, ENSECAG00000014240, ENSECAG00000022058, ENSECAG00000011438, ENSECAG00000020710, ENSECAG00000022600, ENSECAG00000024050, ENSECAG00000009886, ENSECAG00000020513, ENSECAG00000016999, ENSECAG00000019106,…	AHI1, IFT122, DNAAF4, PIBF1, TMEM231, DYNLL1, PTPDC1, PCM1, SEPTIN7, ARL13B, IFT46, ODF2L, IFT57, DRC1, SPAG1, SCLT1, TRAF3IP1, CEP89, CEP20, IQCB1, OFD1, SEPTIN2, BBS5, CENPJ, ODF2, IFT74, BBS7, HYLS1, CEP41, CCDC66, CFAP20, IFT88, FBXW8, ENTR1
GO:0060271_cilium_assembly	0.119	-0.142	0.4	0.4	ENSECAG00000019646, ENSECAG00000015360, ENSECAG00000010951, ENSECAG00000015237, ENSECAG00000023433, ENSECAG00000008104, ENSECAG00000012044, ENSECAG00000011655, ENSECAG00000022693, ENSECAG00000014459, ENSECAG00000014240, ENSECAG00000022058, ENSECAG00000011438, ENSECAG00000020710, ENSECAG00000022600, ENSECAG00000024050, ENSECAG00000009886, ENSECAG00000020513, ENSECAG00000016999, ENSECAG00000019106,…	AHI1, IFT122, DNAAF4, PIBF1, TMEM231, DYNLL1, PTPDC1, PCM1, SEPTIN7, ARL13B, IFT46, ODF2L, IFT57, DRC1, SPAG1, SCLT1, TRAF3IP1, CEP89, CEP20, IQCB1, OFD1, SEPTIN2, BBS5, CENPJ, ODF2, IFT74, BBS7, HYLS1, CEP41, CCDC66, CFAP20, IFT88, FBXW8, ENTR1
GO:0097712_vesicle_targeting,_trans-Golgi_to_periciliary_membrane_compartment	0.119	-0.142	0.4	0.4	ENSECAG00000019646, ENSECAG00000015360, ENSECAG00000010951, ENSECAG00000015237, ENSECAG00000023433, ENSECAG00000008104, ENSECAG00000012044, ENSECAG00000011655, ENSECAG00000022693, ENSECAG00000014459, ENSECAG00000014240, ENSECAG00000022058, ENSECAG00000011438, ENSECAG00000020710, ENSECAG00000022600, ENSECAG00000024050, ENSECAG00000009886, ENSECAG00000020513, ENSECAG00000016999, ENSECAG00000019106,…	AHI1, IFT122, DNAAF4, PIBF1, TMEM231, DYNLL1, PTPDC1, PCM1, SEPTIN7, ARL13B, IFT46, ODF2L, IFT57, DRC1, SPAG1, SCLT1, TRAF3IP1, CEP89, CEP20, IQCB1, OFD1, SEPTIN2, BBS5, CENPJ, ODF2, IFT74, BBS7, HYLS1, CEP41, CCDC66, CFAP20, IFT88, FBXW8, ENTR1
GO:1905349_ciliary_transition_zone_assembly	0.119	-0.142	0.4	0.4	ENSECAG00000019646, ENSECAG00000015360, ENSECAG00000010951, ENSECAG00000015237, ENSECAG00000023433, ENSECAG00000008104, ENSECAG00000012044, ENSECAG00000011655, ENSECAG00000022693, ENSECAG00000014459, ENSECAG00000014240, ENSECAG00000022058, ENSECAG00000011438, ENSECAG00000020710, ENSECAG00000022600, ENSECAG00000024050, ENSECAG00000009886, ENSECAG00000020513, ENSECAG00000016999, ENSECAG00000019106,…	AHI1, IFT122, DNAAF4, PIBF1, TMEM231, DYNLL1, PTPDC1, PCM1, SEPTIN7, ARL13B, IFT46, ODF2L, IFT57, DRC1, SPAG1, SCLT1, TRAF3IP1, CEP89, CEP20, IQCB1, OFD1, SEPTIN2, BBS5, CENPJ, ODF2, IFT74, BBS7, HYLS1, CEP41, CCDC66, CFAP20, IFT88, FBXW8, ENTR1
GO:0044248_cellular_catabolic_process	-0.0144	-0.362	0.384	0.4	ENSECAG00000005798, ENSECAG00000020144, ENSECAG00000024205, ENSECAG00000001582, ENSECAG00000006545, ENSECAG00000018988, ENSECAG00000014582, ENSECAG00000028965, ENSECAG00000011935, ENSECAG00000017022, ENSECAG00000020881, ENSECAG00000000162, ENSECAG00000011728, ENSECAG00000035031, ENSECAG00000010812, ENSECAG00000011878, ENSECAG00000019408, ENSECAG00000007560, ENSECAG00000012970, ENSECAG00000024327,…	CNOT7, UBXN2A, HSPA5, CNOT6L, NSFL1C, XRN2, UFL1, NEDD8, SMURF2, UPF2, CTSC, TRIP12, PYGL, UBB, EDC4, DTL, CAT, FXR1, FAF2, FBXL5, WAC, ZNRF3, YTHDF1, ELOC, LPIN2, ZCCHC17, PLA2G4A, KLHL22, PCYOX1L, HUWE1, ATG5, GNPDA2, HNRNPU, FBXO11, RNF111, ECI1, WIPI2, KCTD13, ATG12, TBC1D22B, ARIH1, FBXO45, YTHDF2, ANAPC1, BFAR, RNF130, TBC1D14, PCNA, EXOSC9, ATG3, ATG2B, PM20D2, SAMD4B, RRAGA, UBE2D1, PLAA,…
GO:0051128_regulation_of_cellular_component_organization	0.421	-0.0855	0.376	0.4	ENSECAG00000017894, ENSECAG00000012810, ENSECAG00000005207, ENSECAG00000013629, ENSECAG00000016925, ENSECAG00000018333, ENSECAG00000017234, ENSECAG00000007560, ENSECAG00000010056, ENSECAG00000024334, ENSECAG00000021002, ENSECAG00000018435, ENSECAG00000017911, ENSECAG00000009003, ENSECAG00000009111, ENSECAG00000009730, ENSECAG00000007955, ENSECAG00000010222, ENSECAG00000023879, ENSECAG00000000050,…	CKAP2, TNKS2, RAB4A, ADD3, WAPL, EZR, ARHGAP17, FXR1, C1H10orf90, CARMIL1, ROCK1, WDR1, PDCD10, APC, RUFY3, SAR1A, HNRNPU, MAPRE1, IQGAP1, WASF3, CCSAP, ANAPC1, TBC1D14, SPICE1, CEP120, CLIP1, MSN, CLSTN1, ODF2L, TMSB4X, NGF, PAK2, MTSS1, PAK1, BUB1B, ATF7IP2, MFF, LRRC4C, MAPRE2, RESF1, NPM1, TRAF3IP1, CDCA2, FBXO5, IQGAP2, MAP1S, ZWILCH, PHLDB2, EPS8, NEDD4L, RHOT1, SENP6, WEE2, TMEM39A, ODF2, …
GO:0001932_regulation_of_protein_phosphorylation	0.0805	-0.503	0.352	0.4	ENSECAG00000021289, ENSECAG00000023233, ENSECAG00000007560, ENSECAG00000017911, ENSECAG00000016020, ENSECAG00000016023, ENSECAG00000020015, ENSECAG00000020270, ENSECAG00000015053, ENSECAG00000010553, ENSECAG00000024659, ENSECAG00000019369, ENSECAG00000008787, ENSECAG00000014813, ENSECAG00000020161, ENSECAG00000023795, ENSECAG00000010405, ENSECAG00000001853, ENSECAG00000022567, ENSECAG00000031442,…	CCNE1, BMP15, FXR1, PDCD10, CCNJ, CCNO, BMP6, CCNE2, SDCBP, NGF, PRRC1, CCNF, CCNB3, CCNB2, CCNI, MOB1B, TRIB2, CCNH, RACK1, FGF16, CCNB1, DTNBP1, CCNG2, MNAT1, GDF9, PPIL4, SH3BP5, FMR1, PMEPA1, CBLB
GO:0022008_neurogenesis	0.145	-0.379	0.32	0.4	ENSECAG00000019993, ENSECAG00000038178, ENSECAG00000007560, ENSECAG00000014600, ENSECAG00000023274, ENSECAG00000006665, ENSECAG00000009111, ENSECAG00000011669, ENSECAG00000017632, ENSECAG00000005815, ENSECAG00000028820, ENSECAG00000010553, ENSECAG00000020281, ENSECAG00000003887, ENSECAG00000011938, ENSECAG00000017840, ENSECAG00000022329, ENSECAG00000009523, ENSECAG00000008730, ENSECAG00000021359,…	KALRN, HEY2, FXR1, TRAK1, LAMA5, GPM6B, RUFY3, TNN, GCM2, LLPH, HEY1, NGF, PAK2, PBX2, MANF, PAK1, LRRC4C, ISL2, MAP4K4, RTN3, NOTCH1, KIF5B, MAP1S, FRYL, ZFHX3, ACTB, NEDD4L, DTNBP1, SMO, TIAM1, ACTB, VAPA, FMR1, UNK, ACSL3, ENAH, TAOK3, PPP1R9B, LHX8, GSK3B
GO:0007049_cell_cycle	0.491	0.356	0.416	0.408	ENSECAG00000021289, ENSECAG00000016155, ENSECAG00000023961, ENSECAG00000021147, ENSECAG00000020286, ENSECAG00000014979, ENSECAG00000000354, ENSECAG00000010827, ENSECAG00000020524, ENSECAG00000007240, ENSECAG00000010318, ENSECAG00000014631, ENSECAG00000016913, ENSECAG00000016925, ENSECAG00000020174, ENSECAG00000005768, ENSECAG00000010056, ENSECAG00000031204, ENSECAG00000020071, ENSECAG00000012899,…	CCNE1, KIF18A, AURKA, ATM, BIRC7, AFAP1L2, PLK2, TEX15, MRNIP, CYLD, CEP63, TUBAL3, MEIKIN, WAPL, CENPW, SEPTIN11, C1H10orf90, PIM3, XIAP, ESCO2, RB1, NUF2, KIF11, HUS1, ROCK1, NUSAP1, NIPBL, PRC1, AVEN, CCNJ, BRIP1, SPATA22, CLASP1, HNRNPU, ANXA11, MAPRE1, DSCC1, PCM1, TERB1, SEPTIN7, CCNO, BIRC5, CCSAP, KIF18B, TUBA1C, ANAPC1, CETN2, MAP9, SPICE1, CEP120, CCNE2, INSC, TUBE1, PARD6B, NCAPG, SMC1…
GO:0060284_regulation_of_cell_development	0.0575	-0.112	0.416	0.408	ENSECAG00000038178, ENSECAG00000028820, ENSECAG00000010553, ENSECAG00000013136, ENSECAG00000032992	HEY2, HEY1, NGF, ADD1, TIAM1
GO:0044770_cell_cycle_phase_transition	0.00903	-0.225	0.416	0.408	ENSECAG00000021289, ENSECAG00000021147, ENSECAG00000020524, ENSECAG00000014575, ENSECAG00000013845, ENSECAG00000018235, ENSECAG00000016020, ENSECAG00000016023, ENSECAG00000007006, ENSECAG00000020270, ENSECAG00000009913, ENSECAG00000012903, ENSECAG00000019369, ENSECAG00000021452, ENSECAG00000008787, ENSECAG00000014813, ENSECAG00000020161, ENSECAG00000003634, ENSECAG00000021177, ENSECAG00000004590,…	CCNE1, ATM, MRNIP, RB1, HUS1, AVEN, CCNJ, CCNO, ANAPC1, CCNE2, CDC6, WDR76, CCNF, BUB1B, CCNB3, CCNB2, CCNI, RHNO1, CDK2, TIPIN, ZNF830, ZWILCH, TICRR, CCNB1, CDK4, CCNG2, CDC25C, DBF4, MTBP, BUB3, NABP1, TTK, BUB1
GO:0010948_negative_regulation_of_cell_cycle_process	0.205	-0.0194	0.408	0.408	ENSECAG00000021147, ENSECAG00000020524, ENSECAG00000014575, ENSECAG00000013845, ENSECAG00000018235, ENSECAG00000009913, ENSECAG00000012903, ENSECAG00000021452, ENSECAG00000003634, ENSECAG00000004590, ENSECAG00000011630, ENSECAG00000003872, ENSECAG00000018367, ENSECAG00000021453, ENSECAG00000010047, ENSECAG00000016773, ENSECAG00000023776, ENSECAG00000017103	ATM, MRNIP, RB1, HUS1, AVEN, CDC6, WDR76, BUB1B, RHNO1, TIPIN, FBXO5, ZNF830, ZWILCH, TICRR, BUB3, NABP1, TTK, BUB1
GO:0046034_ATP_metabolic_process	-0.0883	-0.322	0.408	0.408	ENSECAG00000024684, ENSECAG00000029282, ENSECAG00000022081, ENSECAG00000012512, ENSECAG00000019133, ENSECAG00000009780, ENSECAG00000011722, ENSECAG00000007644, ENSECAG00000025162, ENSECAG00000028274, ENSECAG00000007968, ENSECAG00000021690	ATP5F1C, UQCRQ, PARG, COX6A1, TIGAR, UQCRB, COX4I1, PKM, ATP5F1E, NDUFB6, COX5B, NDUFS6
GO:0019646_aerobic_electron_transport_chain	-0.206	-0.377	0.408	0.408	ENSECAG00000029282, ENSECAG00000012512, ENSECAG00000009780, ENSECAG00000011722, ENSECAG00000007968, ENSECAG00000021690	UQCRQ, COX6A1, UQCRB, COX4I1, COX5B, NDUFS6
GO:0098660_inorganic_ion_transmembrane_transport	-0.314	-0.427	0.408	0.408	ENSECAG00000024970, ENSECAG00000014112, ENSECAG00000024684, ENSECAG00000029282, ENSECAG00000021259, ENSECAG00000006518, ENSECAG00000012027, ENSECAG00000023360, ENSECAG00000020082, ENSECAG00000019132, ENSECAG00000041537, ENSECAG00000013480, ENSECAG00000016301, ENSECAG00000024623, ENSECAG00000009911, ENSECAG00000010585, ENSECAG00000012512, ENSECAG00000000751, ENSECAG00000007671, ENSECAG00000009780,…	KCNQ1, SLC20A1, ATP5F1C, UQCRQ, SCNN1G, SLC39A10, CACNA1E, KCNK10, KCNN2, SLMAP, FXYD6, ANO4, MCUB, ATP1A1, SLC12A7, KCNK7, COX6A1, NEDD4L, ATP2A2, UQCRB, COX4I1, SLC35G1, MICU2, ATP5F1E, WNK1, NDUFB6, KCNK1, COX5B, NDUFS6, SLC39A6, ATP1B1
GO:1901988_negative_regulation_of_cell_cycle_phase_transition	0.12	-0.11	0.4	0.408	ENSECAG00000021147, ENSECAG00000020524, ENSECAG00000014575, ENSECAG00000013845, ENSECAG00000018235, ENSECAG00000009913, ENSECAG00000012903, ENSECAG00000021452, ENSECAG00000003634, ENSECAG00000004590, ENSECAG00000003872, ENSECAG00000018367, ENSECAG00000021453, ENSECAG00000010047, ENSECAG00000016773, ENSECAG00000023776, ENSECAG00000017103	ATM, MRNIP, RB1, HUS1, AVEN, CDC6, WDR76, BUB1B, RHNO1, TIPIN, ZNF830, ZWILCH, TICRR, BUB3, NABP1, TTK, BUB1
GO:0007166_cell_surface_receptor_signaling_pathway	-0.169	-0.438	0.44	0.416	ENSECAG00000012810, ENSECAG00000023233, ENSECAG00000017695, ENSECAG00000014979, ENSECAG00000021358, ENSECAG00000007240, ENSECAG00000019837, ENSECAG00000011935, ENSECAG00000006638, ENSECAG00000038178, ENSECAG00000013300, ENSECAG00000011694, ENSECAG00000000138, ENSECAG00000006518, ENSECAG00000007963, ENSECAG00000017386, ENSECAG00000014371, ENSECAG00000009003, ENSECAG00000013706, ENSECAG00000019257,…	TNKS2, BMP15, KIAA0586, AFAP1L2, SFRP1, CYLD, PIK3R1, SMURF2, CASP8AP2, HEY2, CXCL10, ZNRF3, ACVR2A, SLC39A10, ADAM10, ITGA1, CSNK1G2, APC, SMAD6, RBPJ, RANBP10, SKOR1, RNF111, IGF1R, LEPROT, BMP6, DLGAP4, HEY1, SDCBP, MS4A5, SH2B2, SMAD1, NGF, STIL, DTX2, IRAK2, RNF34, SMAD2, TCF7L1, PIK3R3, TLE1, SMAD3, ADIPOR2, FGFR1, LIFR, TRAF6, SMAD5, NOTCH1, TICAM2, CSNK1G3, EIF4E1B, GUCY2C, FGF16, JAK1, C…
GO:0006281_DNA_repair	-0.0273	-0.0418	0.424	0.416	ENSECAG00000011567, ENSECAG00000010827, ENSECAG00000015499, ENSECAG00000014072, ENSECAG00000013845, ENSECAG00000022979, ENSECAG00000018233, ENSECAG00000009962, ENSECAG00000008011, ENSECAG00000024392, ENSECAG00000020522, ENSECAG00000020269, ENSECAG00000000796, ENSECAG00000007804, ENSECAG00000022964, ENSECAG00000018454, ENSECAG00000026921, ENSECAG00000022081, ENSECAG00000017007, ENSECAG00000016392,…	UIMC1, TEX15, XPC, PMS2, HUS1, MPG, NIPBL, MSH3, MLH3, BRIP1, PRIMPOL, XRCC4, CETN2, REV1, CDC7, RBBP8, APEX2, PARG, FANCL, RAD21, MCM6, MCM5, DEK, RNF168, RAD50, CGAS, WDR70, NEIL3, MCM2, RFC4, INIP, RHNO1, GTF2H5, GINS2, GTF2H1, RAD52, MSH6, BLM, TIGAR, DCLRE1A, RAD18, MSH2, MNAT1, TDP1, GINS4, MUTYH, NUCKS1, NABP1, PALB2, BRCA2, RAD51AP1, EYA1, POLD3, OTUB1, ACTR8, REV3L, UBE2N, NSMCE4A, RFC3
GO:0071310_cellular_response_to_organic_substance	-0.123	-0.429	0.424	0.416	ENSECAG00000023233, ENSECAG00000024205, ENSECAG00000019837, ENSECAG00000011935, ENSECAG00000013569, ENSECAG00000013300, ENSECAG00000000138, ENSECAG00000016551, ENSECAG00000006280, ENSECAG00000013706, ENSECAG00000029421, ENSECAG00000024243, ENSECAG00000036584, ENSECAG00000024602, ENSECAG00000016346, ENSECAG00000011120, ENSECAG00000015053, ENSECAG00000005729, ENSECAG00000022649, ENSECAG00000010247,…	BMP15, HSPA5, PIK3R1, SMURF2, LAMTOR3, CXCL10, ACVR2A, RAB13, LPIN2, SMAD6, HSPA2, GNAS, SKOR1, RNF111, LEPROT, THRA, SDCBP, RRAGA, SMAD1, DERL2, NGF, IRAK2, HSPA8, SMAD2, ERBIN, PIK3R3, CGAS, LAMTOR5, SMAD3, ADIPOR2, LIFR, TRAF6, SMAD5, TICAM2, RAP1A, EIF4E1B, AMFR, FGF16, JAK1, SELENOS, SERP1, LAMTOR1, SRARP, NCOA1, IL13RA1, GDF9, PKM, SPATA2, ACVR1B, IL37, TSPAN3, LAMTOR4, ATF6B, TWSG1, PMEPA1…
GO:0009966_regulation_of_signal_transduction	-0.0632	-0.48	0.424	0.416	ENSECAG00000012810, ENSECAG00000021147, ENSECAG00000013186, ENSECAG00000023233, ENSECAG00000014979, ENSECAG00000021358, ENSECAG00000007240, ENSECAG00000011935, ENSECAG00000013569, ENSECAG00000017234, ENSECAG00000024797, ENSECAG00000009706, ENSECAG00000005374, ENSECAG00000011694, ENSECAG00000006518, ENSECAG00000023011, ENSECAG00000017911, ENSECAG00000015363, ENSECAG00000014371, ENSECAG00000009003,…	TNKS2, ATM, WWC3, BMP15, AFAP1L2, SFRP1, CYLD, SMURF2, LAMTOR3, ARHGAP17, PDE3B, AKAP13, WAC, ZNRF3, SLC39A10, RIPK2, PDCD10, KLHL22, CSNK1G2, APC, GNAS, SKOR1, RNF111, LURAP1L, IGF1R, KCTD13, LEPROT, BMP6, WWC1, DLGAP4, KLHDC10, SDCBP, RRAGA, TMEM9B, PAK2, PAK1, RNF34, WDR76, UACA, ARHGEF28, MAP4K4, NPRL3, TLE1, LAMTOR5, SEC14L1, TRAF6, TICAM2, CSNK1G3, EPS8, EIF4E1B, ARMC10, KCTD10, TMED4, CHD8…
GO:0051235_maintenance_of_location	0.169	0.144	0.416	0.416	ENSECAG00000008683, ENSECAG00000009190, ENSECAG00000024663, ENSECAG00000024608, ENSECAG00000009566	FTH1, TMSB4X, PLIN2, SREBF2, GOPC
GO:0007094_mitotic_spindle_assembly_checkpoint_signaling	0.249	0.0196	0.416	0.416	ENSECAG00000021452, ENSECAG00000018367, ENSECAG00000010047, ENSECAG00000023776, ENSECAG00000017103	BUB1B, ZWILCH, BUB3, TTK, BUB1
GO:0030071_regulation_of_mitotic_metaphase/anaphase_transition	0.249	0.0196	0.416	0.416	ENSECAG00000021452, ENSECAG00000018367, ENSECAG00000010047, ENSECAG00000023776, ENSECAG00000017103	BUB1B, ZWILCH, BUB3, TTK, BUB1
GO:0033046_negative_regulation_of_sister_chromatid_segregation	0.249	0.0196	0.416	0.416	ENSECAG00000021452, ENSECAG00000018367, ENSECAG00000010047, ENSECAG00000023776, ENSECAG00000017103	BUB1B, ZWILCH, BUB3, TTK, BUB1
GO:0033048_negative_regulation_of_mitotic_sister_chromatid_segregation	0.249	0.0196	0.416	0.416	ENSECAG00000021452, ENSECAG00000018367, ENSECAG00000010047, ENSECAG00000023776, ENSECAG00000017103	BUB1B, ZWILCH, BUB3, TTK, BUB1
GO:0045839_negative_regulation_of_mitotic_nuclear_division	0.249	0.0196	0.416	0.416	ENSECAG00000021452, ENSECAG00000018367, ENSECAG00000010047, ENSECAG00000023776, ENSECAG00000017103	BUB1B, ZWILCH, BUB3, TTK, BUB1
GO:0045841_negative_regulation_of_mitotic_metaphase/anaphase_transition	0.249	0.0196	0.416	0.416	ENSECAG00000021452, ENSECAG00000018367, ENSECAG00000010047, ENSECAG00000023776, ENSECAG00000017103	BUB1B, ZWILCH, BUB3, TTK, BUB1
GO:0051985_negative_regulation_of_chromosome_segregation	0.249	0.0196	0.416	0.416	ENSECAG00000021452, ENSECAG00000018367, ENSECAG00000010047, ENSECAG00000023776, ENSECAG00000017103	BUB1B, ZWILCH, BUB3, TTK, BUB1
GO:1902099_regulation_of_metaphase/anaphase_transition_of_cell_cycle	0.249	0.0196	0.416	0.416	ENSECAG00000021452, ENSECAG00000018367, ENSECAG00000010047, ENSECAG00000023776, ENSECAG00000017103	BUB1B, ZWILCH, BUB3, TTK, BUB1
GO:1902100_negative_regulation_of_metaphase/anaphase_transition_of_cell_cycle	0.249	0.0196	0.416	0.416	ENSECAG00000021452, ENSECAG00000018367, ENSECAG00000010047, ENSECAG00000023776, ENSECAG00000017103	BUB1B, ZWILCH, BUB3, TTK, BUB1
GO:1905819_negative_regulation_of_chromosome_separation	0.249	0.0196	0.416	0.416	ENSECAG00000021452, ENSECAG00000018367, ENSECAG00000010047, ENSECAG00000023776, ENSECAG00000017103	BUB1B, ZWILCH, BUB3, TTK, BUB1
GO:2000816_negative_regulation_of_mitotic_sister_chromatid_separation	0.249	0.0196	0.416	0.416	ENSECAG00000021452, ENSECAG00000018367, ENSECAG00000010047, ENSECAG00000023776, ENSECAG00000017103	BUB1B, ZWILCH, BUB3, TTK, BUB1
GO:0042773_ATP_synthesis_coupled_electron_transport	-0.115	-0.305	0.416	0.416	ENSECAG00000029282, ENSECAG00000012512, ENSECAG00000009780, ENSECAG00000011722, ENSECAG00000028274, ENSECAG00000007968, ENSECAG00000021690	UQCRQ, COX6A1, UQCRB, COX4I1, NDUFB6, COX5B, NDUFS6
GO:0042775_mitochondrial_ATP_synthesis_coupled_electron_transport	-0.115	-0.305	0.416	0.416	ENSECAG00000029282, ENSECAG00000012512, ENSECAG00000009780, ENSECAG00000011722, ENSECAG00000028274, ENSECAG00000007968, ENSECAG00000021690	UQCRQ, COX6A1, UQCRB, COX4I1, NDUFB6, COX5B, NDUFS6
GO:0032434_regulation_of_proteasomal_ubiquitin-dependent_protein_catabolic_process	-0.219	-0.375	0.416	0.416	ENSECAG00000014582, ENSECAG00000019466, ENSECAG00000010405, ENSECAG00000021240, ENSECAG00000036783, ENSECAG00000019705	UFL1, ARIH1, TRIB2, SH3RF1, SVIP, CDC20
GO:0061136_regulation_of_proteasomal_protein_catabolic_process	-0.219	-0.375	0.416	0.416	ENSECAG00000014582, ENSECAG00000019466, ENSECAG00000010405, ENSECAG00000021240, ENSECAG00000036783, ENSECAG00000019705	UFL1, ARIH1, TRIB2, SH3RF1, SVIP, CDC20
GO:0051783_regulation_of_nuclear_division	0.162	-0.0169	0.408	0.416	ENSECAG00000021452, ENSECAG00000013188, ENSECAG00000011630, ENSECAG00000018367, ENSECAG00000021800, ENSECAG00000010047, ENSECAG00000023776, ENSECAG00000017103	BUB1B, CDCA2, FBXO5, ZWILCH, WEE2, BUB3, TTK, BUB1
GO:0046785_microtubule_polymerization	0.129	0.112	0.4	0.416	ENSECAG00000009648, ENSECAG00000023466, ENSECAG00000008051, ENSECAG00000027735, ENSECAG00000015563	CLIP1, SLAIN2, CEP192, TUBG1, CKAP5
GO:0051302_regulation_of_cell_division	0.0316	-0.005	0.4	0.416	ENSECAG00000023961, ENSECAG00000000354, ENSECAG00000006869, ENSECAG00000009559, ENSECAG00000017777, ENSECAG00000010463	AURKA, PLK2, MAP9, INSC, PLK1, ENTR1
GO:0048468_cell_development	0.13	-0.352	0.352	0.416	ENSECAG00000019993, ENSECAG00000020528, ENSECAG00000038178, ENSECAG00000007560, ENSECAG00000023274, ENSECAG00000006665, ENSECAG00000009111, ENSECAG00000011669, ENSECAG00000008303, ENSECAG00000005815, ENSECAG00000028820, ENSECAG00000010553, ENSECAG00000020281, ENSECAG00000003887, ENSECAG00000011938, ENSECAG00000017840, ENSECAG00000022329, ENSECAG00000009523, ENSECAG00000008709, ENSECAG00000008730,…	KALRN, TJP1, HEY2, FXR1, LAMA5, GPM6B, RUFY3, TNN, LAMB1, LLPH, HEY1, NGF, PAK2, PBX2, MANF, PAK1, LRRC4C, ISL2, LMOD3, MAP4K4, NOTCH1, KIF5B, MAP1S, FRYL, ACTB, NEDD4L, ACTN4, LSR, FHOD3, ACTN1, DTNBP1, SMO, ADD1, TIAM1, ACTB, VAPA, FMR1, CSRP2, UNK, ENAH, TAOK3, PPP1R9B, LHX8, GSK3B
GO:0008608_attachment_of_spindle_microtubules_to_kinetochore	-0.022	-0.0704	0.488	0.424	ENSECAG00000009163, ENSECAG00000007955, ENSECAG00000010666, ENSECAG00000018267, ENSECAG00000008827	NUF2, HNRNPU, KNSTRN, CENPC, NDC80
GO:0051179_localization	-0.267	-0.439	0.456	0.424	ENSECAG00000019646, ENSECAG00000012810, ENSECAG00000005207, ENSECAG00000015766, ENSECAG00000024970, ENSECAG00000013186, ENSECAG00000022330, ENSECAG00000024920, ENSECAG00000013384, ENSECAG00000012282, ENSECAG00000015360, ENSECAG00000020824, ENSECAG00000036345, ENSECAG00000020528, ENSECAG00000018130, ENSECAG00000010951, ENSECAG00000014112, ENSECAG00000010873, ENSECAG00000012391, ENSECAG00000015237,…	AHI1, TNKS2, RAB4A, SNCA, KCNQ1, WWC3, ERGIC2, XPO1, STX3, MPP7, IFT122, EPS15, SNX12, TJP1, ZFAND6, DNAAF4, SLC20A1, CNIH4, ROMO1, PIBF1, NMB, SLCO3A1, WAPL, SORT1, EZR, TNPO1, YWHAZ, RIMS1, BCAP31, FXR1, GOLGA7, SEPTIN11, CXCL10, TMEM231, NUP35, PIK3CA, TOMM20, ATP5F1C, SYT11, TRAK1, TIMM44, SLC16A1, UQCRQ, AKAP11, SCNN1G, TXNIP, NUF2, CADPS2, DYNLL1, SLC39A10, NBEAL1, CARMIL1, RHOA, BNIP3, RAB…
GO:0032446_protein_modification_by_small_protein_conjugation	-0.0786	-0.164	0.448	0.424	ENSECAG00000020286, ENSECAG00000014582, ENSECAG00000028965, ENSECAG00000023670, ENSECAG00000000162, ENSECAG00000035031, ENSECAG00000005374, ENSECAG00000002087, ENSECAG00000020071, ENSECAG00000018149, ENSECAG00000017183, ENSECAG00000015363, ENSECAG00000021385, ENSECAG00000019655, ENSECAG00000009988, ENSECAG00000008466, ENSECAG00000012915, ENSECAG00000023177, ENSECAG00000019466, ENSECAG00000007006,…	BIRC7, UFL1, NEDD8, CUL4B, TRIP12, UBB, WAC, SAE1, XIAP, RNF20, PCGF6, KLHL22, HUWE1, SVBP, FBXO11, BIRC5, KCTD13, TBC1D22B, ARIH1, ANAPC1, PIAS4, CBLL1, UBE2D1, UBE2E3, DTX2, PIAS2, FANCL, FBXO32, UBE2S, RNF34, UBE2E1, UBE2K, WDR70, UBE2I, UHRF1, TRAF6, CNOT4, CUL1, UBB, HECTD1, PCGF1, RPS27A, AMFR, KCTD10, TOPORS, PIAS1, SH3RF1, AKTIP, UBE2Q2, RAD18, UBE2T, FBXO25, RFFL, BIRC3, UBE4A, UBE2Q1, D…
GO:0000381_regulation_of_alternative_mRNA_splicing,_via_spliceosome	0.00404	-0.518	0.448	0.424	ENSECAG00000007560, ENSECAG00000007955, ENSECAG00000010194, ENSECAG00000008833, ENSECAG00000018923, ENSECAG00000003471, ENSECAG00000019346, ENSECAG00000023962, ENSECAG00000006649, ENSECAG00000007741, ENSECAG00000032767	FXR1, HNRNPU, KHDRBS3, SPEN, RBFOX2, WTAP, KHDRBS1, SF3A1, CELF2, CELF1, FMR1
GO:0022402_cell_cycle_process	0.355	0.212	0.432	0.424	ENSECAG00000021289, ENSECAG00000016155, ENSECAG00000023961, ENSECAG00000021147, ENSECAG00000014979, ENSECAG00000000354, ENSECAG00000010827, ENSECAG00000020524, ENSECAG00000007240, ENSECAG00000010318, ENSECAG00000014631, ENSECAG00000016913, ENSECAG00000016925, ENSECAG00000020174, ENSECAG00000005768, ENSECAG00000010056, ENSECAG00000031204, ENSECAG00000012899, ENSECAG00000014575, ENSECAG00000009163,…	CCNE1, KIF18A, AURKA, ATM, AFAP1L2, PLK2, TEX15, MRNIP, CYLD, CEP63, TUBAL3, MEIKIN, WAPL, CENPW, SEPTIN11, C1H10orf90, PIM3, ESCO2, RB1, NUF2, KIF11, HUS1, ROCK1, NUSAP1, NIPBL, PRC1, AVEN, CCNJ, BRIP1, SPATA22, CLASP1, HNRNPU, ANXA11, MAPRE1, DSCC1, PCM1, TERB1, SEPTIN7, CCNO, CCSAP, KIF18B, TUBA1C, ANAPC1, CETN2, MAP9, SPICE1, CEP120, CCNE2, INSC, TUBE1, PARD6B, NCAPG, SMC1A, CDC6, STIL, IRAK2…
GO:0000280_nuclear_division	0.176	0.0372	0.432	0.424	ENSECAG00000021289, ENSECAG00000016155, ENSECAG00000023961, ENSECAG00000014979, ENSECAG00000000354, ENSECAG00000010827, ENSECAG00000020524, ENSECAG00000007240, ENSECAG00000014631, ENSECAG00000016913, ENSECAG00000020174, ENSECAG00000031204, ENSECAG00000012899, ENSECAG00000014575, ENSECAG00000009163, ENSECAG00000006607, ENSECAG00000013845, ENSECAG00000021002, ENSECAG00000016495, ENSECAG00000018233,…	CCNE1, KIF18A, AURKA, AFAP1L2, PLK2, TEX15, MRNIP, CYLD, TUBAL3, MEIKIN, CENPW, PIM3, ESCO2, RB1, NUF2, KIF11, HUS1, ROCK1, NUSAP1, NIPBL, PRC1, AVEN, CCNJ, BRIP1, SPATA22, CLASP1, HNRNPU, DSCC1, TERB1, CCNO, CCSAP, KIF18B, TUBA1C, ANAPC1, CETN2, MAP9, SPICE1, CCNE2, INSC, TUBE1, NCAPG, CDC6, STIL, IRAK2, RAD21, MCM6, CCNF, BUB1B, POLA1, RAD50, KIF4A, CCNB3, DCTN6, MND1, CCNB2, WRAP73, CCNI, MCM2…
GO:0043549_regulation_of_kinase_activity	0.132	-0.116	0.424	0.424	ENSECAG00000021289, ENSECAG00000019837, ENSECAG00000017911, ENSECAG00000016020, ENSECAG00000021238, ENSECAG00000016023, ENSECAG00000020270, ENSECAG00000024659, ENSECAG00000019369, ENSECAG00000011752, ENSECAG00000033344, ENSECAG00000008787, ENSECAG00000014813, ENSECAG00000020161, ENSECAG00000015006, ENSECAG00000010405, ENSECAG00000001853, ENSECAG00000015806, ENSECAG00000012588, ENSECAG00000014113,…	CCNE1, PIK3R1, PDCD10, CCNJ, IGF1R, CCNO, CCNE2, PRRC1, CCNF, ATG14, PIK3R3, CCNB3, CCNB2, CCNI, FGFR1, TRIB2, CCNH, CCNB1, DTNBP1, CCNG2, MNAT1, SH3BP5, CBLB
GO:0000724_double-strand_break_repair_via_homologous_recombination	-0.0621	-0.0973	0.416	0.424	ENSECAG00000010827, ENSECAG00000013845, ENSECAG00000018233, ENSECAG00000022964, ENSECAG00000018454, ENSECAG00000016392, ENSECAG00000008840, ENSECAG00000014368, ENSECAG00000019809, ENSECAG00000019631, ENSECAG00000024215, ENSECAG00000018676, ENSECAG00000020517, ENSECAG00000010336, ENSECAG00000016773, ENSECAG00000008391, ENSECAG00000014890, ENSECAG00000010367, ENSECAG00000022502	TEX15, HUS1, NIPBL, CDC7, RBBP8, RAD21, MCM6, MCM5, CGAS, MCM2, GINS2, RAD52, GINS4, NUCKS1, NABP1, PALB2, BRCA2, RAD51AP1, REV3L
GO:0045143_homologous_chromosome_segregation	-0.131	-0.217	0.416	0.424	ENSECAG00000010827, ENSECAG00000016913, ENSECAG00000017824, ENSECAG00000016392, ENSECAG00000018267	TEX15, MEIKIN, TERB1, RAD21, CENPC
GO:0000278_mitotic_cell_cycle	0.196	0.0596	0.448	0.432	ENSECAG00000021289, ENSECAG00000016155, ENSECAG00000023961, ENSECAG00000014979, ENSECAG00000000354, ENSECAG00000020524, ENSECAG00000007240, ENSECAG00000014631, ENSECAG00000020174, ENSECAG00000031204, ENSECAG00000012899, ENSECAG00000014575, ENSECAG00000009163, ENSECAG00000006607, ENSECAG00000013845, ENSECAG00000021002, ENSECAG00000016495, ENSECAG00000018233, ENSECAG00000017906, ENSECAG00000018235,…	CCNE1, KIF18A, AURKA, AFAP1L2, PLK2, MRNIP, CYLD, TUBAL3, CENPW, PIM3, ESCO2, RB1, NUF2, KIF11, HUS1, ROCK1, NUSAP1, NIPBL, PRC1, AVEN, CCNJ, CLASP1, HNRNPU, DSCC1, CCNO, CCSAP, KIF18B, TUBA1C, ANAPC1, CETN2, MAP9, SPICE1, CCNE2, INSC, TUBE1, NCAPG, CDC6, STIL, IRAK2, RAD21, MCM6, CCNF, BUB1B, POLA1, KIF4A, CCNB3, DCTN6, CCNB2, WRAP73, CCNI, MCM2, CDCA8, MYBL1, CDK2, CDCA2, FBXO5, ZNF830, ZWILCH,…
GO:0140014_mitotic_nuclear_division	0.196	0.0596	0.448	0.432	ENSECAG00000021289, ENSECAG00000016155, ENSECAG00000023961, ENSECAG00000014979, ENSECAG00000000354, ENSECAG00000020524, ENSECAG00000007240, ENSECAG00000014631, ENSECAG00000020174, ENSECAG00000031204, ENSECAG00000012899, ENSECAG00000014575, ENSECAG00000009163, ENSECAG00000006607, ENSECAG00000013845, ENSECAG00000021002, ENSECAG00000016495, ENSECAG00000018233, ENSECAG00000017906, ENSECAG00000018235,…	CCNE1, KIF18A, AURKA, AFAP1L2, PLK2, MRNIP, CYLD, TUBAL3, CENPW, PIM3, ESCO2, RB1, NUF2, KIF11, HUS1, ROCK1, NUSAP1, NIPBL, PRC1, AVEN, CCNJ, CLASP1, HNRNPU, DSCC1, CCNO, CCSAP, KIF18B, TUBA1C, ANAPC1, CETN2, MAP9, SPICE1, CCNE2, INSC, TUBE1, NCAPG, CDC6, STIL, IRAK2, RAD21, MCM6, CCNF, BUB1B, POLA1, KIF4A, CCNB3, DCTN6, CCNB2, WRAP73, CCNI, MCM2, CDCA8, MYBL1, CDK2, CDCA2, FBXO5, ZNF830, ZWILCH,…
GO:1903047_mitotic_cell_cycle_process	0.196	0.0596	0.448	0.432	ENSECAG00000021289, ENSECAG00000016155, ENSECAG00000023961, ENSECAG00000014979, ENSECAG00000000354, ENSECAG00000020524, ENSECAG00000007240, ENSECAG00000014631, ENSECAG00000020174, ENSECAG00000031204, ENSECAG00000012899, ENSECAG00000014575, ENSECAG00000009163, ENSECAG00000006607, ENSECAG00000013845, ENSECAG00000021002, ENSECAG00000016495, ENSECAG00000018233, ENSECAG00000017906, ENSECAG00000018235,…	CCNE1, KIF18A, AURKA, AFAP1L2, PLK2, MRNIP, CYLD, TUBAL3, CENPW, PIM3, ESCO2, RB1, NUF2, KIF11, HUS1, ROCK1, NUSAP1, NIPBL, PRC1, AVEN, CCNJ, CLASP1, HNRNPU, DSCC1, CCNO, CCSAP, KIF18B, TUBA1C, ANAPC1, CETN2, MAP9, SPICE1, CCNE2, INSC, TUBE1, NCAPG, CDC6, STIL, IRAK2, RAD21, MCM6, CCNF, BUB1B, POLA1, KIF4A, CCNB3, DCTN6, CCNB2, WRAP73, CCNI, MCM2, CDCA8, MYBL1, CDK2, CDCA2, FBXO5, ZNF830, ZWILCH,…
GO:1901879_regulation_of_protein_depolymerization	0.144	0.045	0.448	0.432	ENSECAG00000017894, ENSECAG00000013629, ENSECAG00000018435, ENSECAG00000009003, ENSECAG00000000529, ENSECAG00000013136, ENSECAG00000017095	CKAP2, ADD3, WDR1, APC, MAP1S, ADD1, CAMSAP1
GO:0010033_response_to_organic_substance	-0.197	-0.499	0.448	0.432	ENSECAG00000023233, ENSECAG00000024205, ENSECAG00000019837, ENSECAG00000011935, ENSECAG00000013569, ENSECAG00000012970, ENSECAG00000013300, ENSECAG00000000138, ENSECAG00000016551, ENSECAG00000006280, ENSECAG00000013706, ENSECAG00000029421, ENSECAG00000024243, ENSECAG00000036584, ENSECAG00000024602, ENSECAG00000016346, ENSECAG00000011120, ENSECAG00000015053, ENSECAG00000005729, ENSECAG00000022649,…	BMP15, HSPA5, PIK3R1, SMURF2, LAMTOR3, FAF2, CXCL10, ACVR2A, RAB13, LPIN2, SMAD6, HSPA2, GNAS, SKOR1, RNF111, LEPROT, THRA, SDCBP, RRAGA, SMAD1, DERL2, NGF, IRAK2, HSPA8, SMAD2, ERBIN, CANX, PIK3R3, CGAS, LYPD1, ADH5, LAMTOR5, RNF175, REL, SMAD3, ADIPOR2, LIFR, ADH5, TRAF6, SMAD5, TICAM2, RAP1A, EIF4E1B, AMFR, FGF16, JAK1, JKAMP, SELENOS, SERP1, LAMTOR1, SRARP, NCOA1, IL13RA1, GDF9, SVIP, PKM, ER…
GO:0043067_regulation_of_programmed_cell_death	-0.044	-0.192	0.44	0.432	ENSECAG00000008992, ENSECAG00000020286, ENSECAG00000007240, ENSECAG00000019545, ENSECAG00000031204, ENSECAG00000020071, ENSECAG00000016116, ENSECAG00000017458, ENSECAG00000009988, ENSECAG00000008466, ENSECAG00000010553, ENSECAG00000022379, ENSECAG00000042372, ENSECAG00000014198, ENSECAG00000006524, ENSECAG00000000517, ENSECAG00000011461, ENSECAG00000019133, ENSECAG00000021240, ENSECAG00000005770,…	HYPK, BIRC7, CYLD, BIRC6, PIM3, XIAP, USP36, BNIP3, FBXO11, BIRC5, NGF, RNF34, PTMS, MTCH2, FANK1, HTRA2, ARMC10, TIGAR, SH3RF1, BNIP3L, BAG3, RFFL, BIRC3, SPATA2, ABL2, CAAP1, BCL10, EYA1, ABL1
GO:0006898_receptor-mediated_endocytosis	-0.256	-0.23	0.44	0.432	ENSECAG00000012054, ENSECAG00000020425, ENSECAG00000019264, ENSECAG00000007134, ENSECAG00000007129, ENSECAG00000013583, ENSECAG00000021422, ENSECAG00000019077	ITSN1, ITSN2, PICALM, AP2A1, LRP6, CD320, DNAJC13, CLTC
GO:1901987_regulation_of_cell_cycle_phase_transition	-0.0768	-0.29	0.44	0.432	ENSECAG00000021147, ENSECAG00000020524, ENSECAG00000014575, ENSECAG00000013845, ENSECAG00000018235, ENSECAG00000009913, ENSECAG00000012903, ENSECAG00000021452, ENSECAG00000003634, ENSECAG00000021177, ENSECAG00000004590, ENSECAG00000003872, ENSECAG00000018367, ENSECAG00000021453, ENSECAG00000025015, ENSECAG00000003029, ENSECAG00000014613, ENSECAG00000000235, ENSECAG00000010047, ENSECAG00000016773,…	ATM, MRNIP, RB1, HUS1, AVEN, CDC6, WDR76, BUB1B, RHNO1, CDK2, TIPIN, ZNF830, ZWILCH, TICRR, CDK4, CDC25C, DBF4, MTBP, BUB3, NABP1, TTK, BUB1
GO:0019220_regulation_of_phosphate_metabolic_process	0.0766	-0.504	0.384	0.432	ENSECAG00000021289, ENSECAG00000023233, ENSECAG00000017056, ENSECAG00000019837, ENSECAG00000007560, ENSECAG00000017911, ENSECAG00000016020, ENSECAG00000021238, ENSECAG00000016023, ENSECAG00000020015, ENSECAG00000020270, ENSECAG00000015053, ENSECAG00000015322, ENSECAG00000010553, ENSECAG00000024659, ENSECAG00000019369, ENSECAG00000011752, ENSECAG00000033344, ENSECAG00000008787, ENSECAG00000014813,…	CCNE1, BMP15, BTBD10, PIK3R1, FXR1, PDCD10, CCNJ, IGF1R, CCNO, BMP6, CCNE2, SDCBP, PPP6R3, NGF, PRRC1, CCNF, ATG14, PIK3R3, CCNB3, CCNB2, CCNI, FGFR1, MOB1B, TRIB2, CCNH, RACK1, FGF16, TIGAR, CCNB1, CSNK2B, DTNBP1, CCNG2, MNAT1, GDF9, ENSA, PPIL4, URI1, SH3BP5, FMR1, PPP1R12A, PMEPA1, CBLB
GO:0051174_regulation_of_phosphorus_metabolic_process	0.0766	-0.504	0.384	0.432	ENSECAG00000021289, ENSECAG00000023233, ENSECAG00000017056, ENSECAG00000019837, ENSECAG00000007560, ENSECAG00000017911, ENSECAG00000016020, ENSECAG00000021238, ENSECAG00000016023, ENSECAG00000020015, ENSECAG00000020270, ENSECAG00000015053, ENSECAG00000015322, ENSECAG00000010553, ENSECAG00000024659, ENSECAG00000019369, ENSECAG00000011752, ENSECAG00000033344, ENSECAG00000008787, ENSECAG00000014813,…	CCNE1, BMP15, BTBD10, PIK3R1, FXR1, PDCD10, CCNJ, IGF1R, CCNO, BMP6, CCNE2, SDCBP, PPP6R3, NGF, PRRC1, CCNF, ATG14, PIK3R3, CCNB3, CCNB2, CCNI, FGFR1, MOB1B, TRIB2, CCNH, RACK1, FGF16, TIGAR, CCNB1, CSNK2B, DTNBP1, CCNG2, MNAT1, GDF9, ENSA, PPIL4, URI1, SH3BP5, FMR1, PPP1R12A, PMEPA1, CBLB
GO:0042325_regulation_of_phosphorylation	0.143	-0.466	0.368	0.432	ENSECAG00000021289, ENSECAG00000023233, ENSECAG00000017056, ENSECAG00000019837, ENSECAG00000007560, ENSECAG00000017911, ENSECAG00000016020, ENSECAG00000021238, ENSECAG00000016023, ENSECAG00000020015, ENSECAG00000020270, ENSECAG00000015053, ENSECAG00000010553, ENSECAG00000024659, ENSECAG00000019369, ENSECAG00000011752, ENSECAG00000033344, ENSECAG00000008787, ENSECAG00000014813, ENSECAG00000020161,…	CCNE1, BMP15, BTBD10, PIK3R1, FXR1, PDCD10, CCNJ, IGF1R, CCNO, BMP6, CCNE2, SDCBP, NGF, PRRC1, CCNF, ATG14, PIK3R3, CCNB3, CCNB2, CCNI, FGFR1, MOB1B, TRIB2, CCNH, RACK1, FGF16, TIGAR, CCNB1, DTNBP1, CCNG2, MNAT1, GDF9, PPIL4, SH3BP5, FMR1, PMEPA1, CBLB
GO:0035303_regulation_of_dephosphorylation	-0.168	-0.192	0.472	0.44	ENSECAG00000015322, ENSECAG00000021100, ENSECAG00000017165, ENSECAG00000007717, ENSECAG00000020406	PPP6R3, CSNK2B, ENSA, URI1, PPP1R12A
GO:0050776_regulation_of_immune_response	0.141	0.0168	0.44	0.44	ENSECAG00000006518, ENSECAG00000024201, ENSECAG00000019809, ENSECAG00000014473, ENSECAG00000012844, ENSECAG00000010789	SLC39A10, SH2B2, CGAS, SEC14L1, TICAM2, AKIRIN2
GO:0051223_regulation_of_protein_transport	-0.0743	-0.178	0.44	0.44	ENSECAG00000009730, ENSECAG00000036783, ENSECAG00000019987, ENSECAG00000019039, ENSECAG00000008744, ENSECAG00000009566, ENSECAG00000008614	SAR1A, SVIP, GRIPAP1, CNST, UHMK1, GOPC, LLGL2
GO:0070201_regulation_of_establishment_of_protein_localization	-0.0743	-0.178	0.44	0.44	ENSECAG00000009730, ENSECAG00000036783, ENSECAG00000019987, ENSECAG00000019039, ENSECAG00000008744, ENSECAG00000009566, ENSECAG00000008614	SAR1A, SVIP, GRIPAP1, CNST, UHMK1, GOPC, LLGL2
GO:0006903_vesicle_targeting	0.0495	-0.212	0.44	0.44	ENSECAG00000019646, ENSECAG00000015360, ENSECAG00000010951, ENSECAG00000015237, ENSECAG00000023433, ENSECAG00000008104, ENSECAG00000012044, ENSECAG00000009730, ENSECAG00000011655, ENSECAG00000022693, ENSECAG00000014459, ENSECAG00000014240, ENSECAG00000022058, ENSECAG00000011438, ENSECAG00000020710, ENSECAG00000022600, ENSECAG00000024050, ENSECAG00000009886, ENSECAG00000020513, ENSECAG00000016999,…	AHI1, IFT122, DNAAF4, PIBF1, TMEM231, DYNLL1, PTPDC1, SAR1A, PCM1, SEPTIN7, ARL13B, IFT46, ODF2L, IFT57, DRC1, SPAG1, SCLT1, TRAF3IP1, CEP89, CEP20, IQCB1, OFD1, SEPTIN2, BBS5, CENPJ, ODF2, IFT74, BBS7, HYLS1, CEP41, CCDC66, CFAP20, IFT88, FBXW8, ENTR1
GO:0048199_vesicle_targeting,_to,_from_or_within_Golgi	0.0495	-0.212	0.44	0.44	ENSECAG00000019646, ENSECAG00000015360, ENSECAG00000010951, ENSECAG00000015237, ENSECAG00000023433, ENSECAG00000008104, ENSECAG00000012044, ENSECAG00000009730, ENSECAG00000011655, ENSECAG00000022693, ENSECAG00000014459, ENSECAG00000014240, ENSECAG00000022058, ENSECAG00000011438, ENSECAG00000020710, ENSECAG00000022600, ENSECAG00000024050, ENSECAG00000009886, ENSECAG00000020513, ENSECAG00000016999,…	AHI1, IFT122, DNAAF4, PIBF1, TMEM231, DYNLL1, PTPDC1, SAR1A, PCM1, SEPTIN7, ARL13B, IFT46, ODF2L, IFT57, DRC1, SPAG1, SCLT1, TRAF3IP1, CEP89, CEP20, IQCB1, OFD1, SEPTIN2, BBS5, CENPJ, ODF2, IFT74, BBS7, HYLS1, CEP41, CCDC66, CFAP20, IFT88, FBXW8, ENTR1
GO:0009267_cellular_response_to_starvation	-0.24	-0.339	0.44	0.44	ENSECAG00000012967, ENSECAG00000013971, ENSECAG00000005729, ENSECAG00000011752, ENSECAG00000017195, ENSECAG00000015601	PRKAA2, ATG5, RRAGA, ATG14, NPRL3, XPR1
GO:0009991_response_to_extracellular_stimulus	-0.24	-0.339	0.44	0.44	ENSECAG00000012967, ENSECAG00000013971, ENSECAG00000005729, ENSECAG00000011752, ENSECAG00000017195, ENSECAG00000015601	PRKAA2, ATG5, RRAGA, ATG14, NPRL3, XPR1
GO:0031667_response_to_nutrient_levels	-0.24	-0.339	0.44	0.44	ENSECAG00000012967, ENSECAG00000013971, ENSECAG00000005729, ENSECAG00000011752, ENSECAG00000017195, ENSECAG00000015601	PRKAA2, ATG5, RRAGA, ATG14, NPRL3, XPR1
GO:0031668_cellular_response_to_extracellular_stimulus	-0.24	-0.339	0.44	0.44	ENSECAG00000012967, ENSECAG00000013971, ENSECAG00000005729, ENSECAG00000011752, ENSECAG00000017195, ENSECAG00000015601	PRKAA2, ATG5, RRAGA, ATG14, NPRL3, XPR1
GO:0031669_cellular_response_to_nutrient_levels	-0.24	-0.339	0.44	0.44	ENSECAG00000012967, ENSECAG00000013971, ENSECAG00000005729, ENSECAG00000011752, ENSECAG00000017195, ENSECAG00000015601	PRKAA2, ATG5, RRAGA, ATG14, NPRL3, XPR1
GO:0042594_response_to_starvation	-0.24	-0.339	0.44	0.44	ENSECAG00000012967, ENSECAG00000013971, ENSECAG00000005729, ENSECAG00000011752, ENSECAG00000017195, ENSECAG00000015601	PRKAA2, ATG5, RRAGA, ATG14, NPRL3, XPR1
GO:0071496_cellular_response_to_external_stimulus	-0.24	-0.339	0.44	0.44	ENSECAG00000012967, ENSECAG00000013971, ENSECAG00000005729, ENSECAG00000011752, ENSECAG00000017195, ENSECAG00000015601	PRKAA2, ATG5, RRAGA, ATG14, NPRL3, XPR1
GO:0008360_regulation_of_cell_shape	0.0965	0.0507	0.424	0.44	ENSECAG00000022262, ENSECAG00000018333, ENSECAG00000007187, ENSECAG00000012900, ENSECAG00000011111, ENSECAG00000002920	BRWD1, EZR, BRWD3, MSN, FMNL2, RDX
GO:0010646_regulation_of_cell_communication	-0.0331	-0.623	0.4	0.44	ENSECAG00000012810, ENSECAG00000021147, ENSECAG00000013186, ENSECAG00000023233, ENSECAG00000014979, ENSECAG00000021358, ENSECAG00000007240, ENSECAG00000011935, ENSECAG00000008013, ENSECAG00000013569, ENSECAG00000017234, ENSECAG00000024272, ENSECAG00000007560, ENSECAG00000024797, ENSECAG00000009706, ENSECAG00000005374, ENSECAG00000011694, ENSECAG00000006518, ENSECAG00000023011, ENSECAG00000017911,…	TNKS2, ATM, WWC3, BMP15, AFAP1L2, SFRP1, CYLD, SMURF2, NMB, LAMTOR3, ARHGAP17, RIMS1, FXR1, PDE3B, AKAP13, WAC, ZNRF3, SLC39A10, RIPK2, PDCD10, KLHL22, CSNK1G2, APC, GNAS, SKOR1, RNF111, LURAP1L, IGF1R, KCTD13, LEPROT, BMP6, WWC1, DLGAP4, KLHDC10, CLSTN1, SDCBP, RRAGA, TMEM9B, PAK2, PAK1, RNF34, WDR76, LRRC4C, UACA, ARHGEF28, MAP4K4, NPRL3, TLE1, LAMTOR5, SEC14L1, TRAF6, TICAM2, CSNK1G3, RAP1A, E…
GO:0016050_vesicle_organization	-0.227	-0.252	0.48	0.448	ENSECAG00000005207, ENSECAG00000015766, ENSECAG00000013384, ENSECAG00000020824, ENSECAG00000015853, ENSECAG00000024272, ENSECAG00000019725, ENSECAG00000024021, ENSECAG00000016551, ENSECAG00000014117, ENSECAG00000016134, ENSECAG00000014371, ENSECAG00000009730, ENSECAG00000012054, ENSECAG00000023865, ENSECAG00000017044, ENSECAG00000016188, ENSECAG00000006321, ENSECAG00000020425, ENSECAG00000019264,…	RAB4A, SNCA, STX3, EPS15, SORT1, RIMS1, SYT11, CADPS2, RAB13, VAMP7, RAB11FIP1, CSNK1G2, SAR1A, ITSN1, RAB11A, RALA, REPS1, GOLPH3, ITSN2, PICALM, STX7, RAB11FIP2, CSNK1G3, RAP1A, EEA1, UNC13C, SEC24D, WASHC4, LAMTOR1, SEPTIN2, USP8, HEATR5B, DTNBP1, GOSR1, AP2A1, EXOC5, STX8, RAB7A, EXOC3, SEC23B, RAB3IP, LRP6, SNX9, MYO6, STX2, CD320, DNAJC13, CLINT1, SEC31A, STX6, LLGL2, CLTC, ZDHHC20
GO:0006906_vesicle_fusion	-0.0712	-0.155	0.464	0.448	ENSECAG00000013384, ENSECAG00000024272, ENSECAG00000019725, ENSECAG00000024021, ENSECAG00000016551, ENSECAG00000014117, ENSECAG00000016134, ENSECAG00000023865, ENSECAG00000017044, ENSECAG00000019923, ENSECAG00000019791, ENSECAG00000016434, ENSECAG00000022427, ENSECAG00000017553, ENSECAG00000012588, ENSECAG00000040193, ENSECAG00000008168, ENSECAG00000017772, ENSECAG00000012559, ENSECAG00000010149,…	STX3, RIMS1, SYT11, CADPS2, RAB13, VAMP7, RAB11FIP1, RAB11A, RALA, STX7, RAB11FIP2, RAP1A, UNC13C, SEPTIN2, DTNBP1, GOSR1, EXOC5, STX8, RAB7A, EXOC3, RAB3IP, STX2, STX6, LLGL2
GO:0090174_organelle_membrane_fusion	-0.0712	-0.155	0.464	0.448	ENSECAG00000013384, ENSECAG00000024272, ENSECAG00000019725, ENSECAG00000024021, ENSECAG00000016551, ENSECAG00000014117, ENSECAG00000016134, ENSECAG00000023865, ENSECAG00000017044, ENSECAG00000019923, ENSECAG00000019791, ENSECAG00000016434, ENSECAG00000022427, ENSECAG00000017553, ENSECAG00000012588, ENSECAG00000040193, ENSECAG00000008168, ENSECAG00000017772, ENSECAG00000012559, ENSECAG00000010149,…	STX3, RIMS1, SYT11, CADPS2, RAB13, VAMP7, RAB11FIP1, RAB11A, RALA, STX7, RAB11FIP2, RAP1A, UNC13C, SEPTIN2, DTNBP1, GOSR1, EXOC5, STX8, RAB7A, EXOC3, RAB3IP, STX2, STX6, LLGL2
GO:0010941_regulation_of_cell_death	-0.0767	-0.21	0.464	0.448	ENSECAG00000008992, ENSECAG00000015766, ENSECAG00000020286, ENSECAG00000007240, ENSECAG00000019545, ENSECAG00000031204, ENSECAG00000020071, ENSECAG00000016116, ENSECAG00000017458, ENSECAG00000009988, ENSECAG00000008466, ENSECAG00000043283, ENSECAG00000010553, ENSECAG00000022379, ENSECAG00000042372, ENSECAG00000014198, ENSECAG00000006524, ENSECAG00000000517, ENSECAG00000011461, ENSECAG00000019133,…	HYPK, SNCA, BIRC7, CYLD, BIRC6, PIM3, XIAP, USP36, BNIP3, FBXO11, BIRC5, AGR2, NGF, RNF34, PTMS, MTCH2, FANK1, HTRA2, ARMC10, TIGAR, SH3RF1, BNIP3L, BAG3, RFFL, BIRC3, SPATA2, ABL2, CAAP1, BCL10, EYA1, ABL1
GO:0007091_metaphase/anaphase_transition_of_mitotic_cell_cycle	-0.171	-0.384	0.448	0.448	ENSECAG00000007006, ENSECAG00000021452, ENSECAG00000018367, ENSECAG00000010047, ENSECAG00000023776, ENSECAG00000017103	ANAPC1, BUB1B, ZWILCH, BUB3, TTK, BUB1
GO:0010965_regulation_of_mitotic_sister_chromatid_separation	-0.171	-0.384	0.448	0.448	ENSECAG00000007006, ENSECAG00000021452, ENSECAG00000018367, ENSECAG00000010047, ENSECAG00000023776, ENSECAG00000017103	ANAPC1, BUB1B, ZWILCH, BUB3, TTK, BUB1
GO:0044784_metaphase/anaphase_transition_of_cell_cycle	-0.171	-0.384	0.448	0.448	ENSECAG00000007006, ENSECAG00000021452, ENSECAG00000018367, ENSECAG00000010047, ENSECAG00000023776, ENSECAG00000017103	ANAPC1, BUB1B, ZWILCH, BUB3, TTK, BUB1
GO:0051306_mitotic_sister_chromatid_separation	-0.171	-0.384	0.448	0.448	ENSECAG00000007006, ENSECAG00000021452, ENSECAG00000018367, ENSECAG00000010047, ENSECAG00000023776, ENSECAG00000017103	ANAPC1, BUB1B, ZWILCH, BUB3, TTK, BUB1
GO:0006282_regulation_of_DNA_repair	0.235	0.0569	0.432	0.448	ENSECAG00000011567, ENSECAG00000010827, ENSECAG00000022081, ENSECAG00000012231, ENSECAG00000019809, ENSECAG00000019133, ENSECAG00000008636, ENSECAG00000033949	UIMC1, TEX15, PARG, DEK, CGAS, TIGAR, EYA1, OTUB1
GO:0006402_mRNA_catabolic_process	-0.284	-0.961	0.352	0.448	ENSECAG00000005798, ENSECAG00000001582, ENSECAG00000018988, ENSECAG00000017022, ENSECAG00000010812, ENSECAG00000007560, ENSECAG00000019475, ENSECAG00000007955, ENSECAG00000023108, ENSECAG00000024732, ENSECAG00000015551, ENSECAG00000010723, ENSECAG00000023181, ENSECAG00000012606, ENSECAG00000017141, ENSECAG00000012464, ENSECAG00000012956, ENSECAG00000009759, ENSECAG00000032767, ENSECAG00000008822,…	CNOT7, CNOT6L, XRN2, UPF2, EDC4, FXR1, YTHDF1, HNRNPU, YTHDF2, EXOSC9, SAMD4B, ANGEL2, CNOT3, EXOSC8, UPF3A, SYNCRIP, DCPS, TNRC6B, FMR1, FASTKD2, SMG7, UPF3B
GO:0006887_exocytosis	-0.0617	-0.164	0.48	0.456	ENSECAG00000013384, ENSECAG00000024272, ENSECAG00000019725, ENSECAG00000024021, ENSECAG00000016551, ENSECAG00000014117, ENSECAG00000016134, ENSECAG00000023865, ENSECAG00000017044, ENSECAG00000019791, ENSECAG00000016434, ENSECAG00000022427, ENSECAG00000017553, ENSECAG00000012588, ENSECAG00000008168, ENSECAG00000010149, ENSECAG00000021652, ENSECAG00000014615, ENSECAG00000008614	STX3, RIMS1, SYT11, CADPS2, RAB13, VAMP7, RAB11FIP1, RAB11A, RALA, RAB11FIP2, RAP1A, UNC13C, SEPTIN2, DTNBP1, EXOC5, EXOC3, RAB3IP, STX2, LLGL2
GO:0099500_vesicle_fusion_to_plasma_membrane	-0.0617	-0.164	0.48	0.456	ENSECAG00000013384, ENSECAG00000024272, ENSECAG00000019725, ENSECAG00000024021, ENSECAG00000016551, ENSECAG00000014117, ENSECAG00000016134, ENSECAG00000023865, ENSECAG00000017044, ENSECAG00000019791, ENSECAG00000016434, ENSECAG00000022427, ENSECAG00000017553, ENSECAG00000012588, ENSECAG00000008168, ENSECAG00000010149, ENSECAG00000021652, ENSECAG00000014615, ENSECAG00000008614	STX3, RIMS1, SYT11, CADPS2, RAB13, VAMP7, RAB11FIP1, RAB11A, RALA, RAB11FIP2, RAP1A, UNC13C, SEPTIN2, DTNBP1, EXOC5, EXOC3, RAB3IP, STX2, LLGL2
GO:0140029_exocytic_process	-0.0617	-0.164	0.48	0.456	ENSECAG00000013384, ENSECAG00000024272, ENSECAG00000019725, ENSECAG00000024021, ENSECAG00000016551, ENSECAG00000014117, ENSECAG00000016134, ENSECAG00000023865, ENSECAG00000017044, ENSECAG00000019791, ENSECAG00000016434, ENSECAG00000022427, ENSECAG00000017553, ENSECAG00000012588, ENSECAG00000008168, ENSECAG00000010149, ENSECAG00000021652, ENSECAG00000014615, ENSECAG00000008614	STX3, RIMS1, SYT11, CADPS2, RAB13, VAMP7, RAB11FIP1, RAB11A, RALA, RAB11FIP2, RAP1A, UNC13C, SEPTIN2, DTNBP1, EXOC5, EXOC3, RAB3IP, STX2, LLGL2
GO:0009152_purine_ribonucleotide_biosynthetic_process	-0.263	-0.436	0.456	0.456	ENSECAG00000024684, ENSECAG00000029282, ENSECAG00000023269, ENSECAG00000021678, ENSECAG00000017534, ENSECAG00000012512, ENSECAG00000018813, ENSECAG00000009780, ENSECAG00000011722, ENSECAG00000025162, ENSECAG00000020948, ENSECAG00000028274, ENSECAG00000007968, ENSECAG00000021690	ATP5F1C, UQCRQ, GMPS, PAPSS1, HPRT1, COX6A1, GUCY2C, UQCRB, COX4I1, ATP5F1E, PANK3, NDUFB6, COX5B, NDUFS6
GO:0006289_nucleotide-excision_repair	-0.358	-0.396	0.48	0.464	ENSECAG00000015499, ENSECAG00000013845, ENSECAG00000024392, ENSECAG00000000796, ENSECAG00000038860, ENSECAG00000012624	XPC, HUS1, BRIP1, CETN2, GTF2H5, POLD3
GO:0042073_intraciliary_transport	-0.089	-0.346	0.464	0.464	ENSECAG00000019646, ENSECAG00000015360, ENSECAG00000010951, ENSECAG00000015237, ENSECAG00000023433, ENSECAG00000008104, ENSECAG00000012044, ENSECAG00000011655, ENSECAG00000022693, ENSECAG00000014459, ENSECAG00000014240, ENSECAG00000022058, ENSECAG00000011438, ENSECAG00000020710, ENSECAG00000022600, ENSECAG00000024050, ENSECAG00000009886, ENSECAG00000020513, ENSECAG00000016999, ENSECAG00000019106,…	AHI1, IFT122, DNAAF4, PIBF1, TMEM231, DYNLL1, PTPDC1, PCM1, SEPTIN7, ARL13B, IFT46, ODF2L, IFT57, DRC1, SPAG1, SCLT1, TRAF3IP1, CEP89, CEP20, IQCB1, OFD1, SEPTIN2, BBS5, CENPJ, ODF2, IFT74, BBS7, HYLS1, CEP41, LCA5, CCDC66, CFAP20, IFT88, FBXW8, ENTR1
GO:0048284_organelle_fusion	-0.117	-0.193	0.456	0.464	ENSECAG00000013384, ENSECAG00000024272, ENSECAG00000019725, ENSECAG00000024021, ENSECAG00000016551, ENSECAG00000014117, ENSECAG00000016134, ENSECAG00000023865, ENSECAG00000017044, ENSECAG00000019923, ENSECAG00000019791, ENSECAG00000016434, ENSECAG00000022427, ENSECAG00000017553, ENSECAG00000012588, ENSECAG00000040193, ENSECAG00000008168, ENSECAG00000017772, ENSECAG00000012559, ENSECAG00000010149,…	STX3, RIMS1, SYT11, CADPS2, RAB13, VAMP7, RAB11FIP1, RAB11A, RALA, STX7, RAB11FIP2, RAP1A, UNC13C, SEPTIN2, DTNBP1, GOSR1, EXOC5, STX8, RAB7A, EXOC3, RAB3IP, STX2, MFN1, STX6, LLGL2
GO:0048699_generation_of_neurons	0.219	-0.319	0.384	0.464	ENSECAG00000019993, ENSECAG00000038178, ENSECAG00000007560, ENSECAG00000023274, ENSECAG00000006665, ENSECAG00000009111, ENSECAG00000011669, ENSECAG00000005815, ENSECAG00000028820, ENSECAG00000010553, ENSECAG00000020281, ENSECAG00000003887, ENSECAG00000011938, ENSECAG00000017840, ENSECAG00000022329, ENSECAG00000009523, ENSECAG00000008730, ENSECAG00000021359, ENSECAG00000022405, ENSECAG00000000558,…	KALRN, HEY2, FXR1, LAMA5, GPM6B, RUFY3, TNN, LLPH, HEY1, NGF, PAK2, PBX2, MANF, PAK1, LRRC4C, ISL2, MAP4K4, RTN3, NOTCH1, KIF5B, MAP1S, FRYL, ZFHX3, ACTB, NEDD4L, DTNBP1, SMO, TIAM1, ACTB, VAPA, FMR1, UNK, ACSL3, ENAH, TAOK3, PPP1R9B, LHX8, GSK3B
GO:0044255_cellular_lipid_metabolic_process	-0.146	-0.147	0.496	0.472	ENSECAG00000019837, ENSECAG00000014481, ENSECAG00000015019, ENSECAG00000021725, ENSECAG00000006875, ENSECAG00000006280, ENSECAG00000024810, ENSECAG00000023693, ENSECAG00000010524, ENSECAG00000021699, ENSECAG00000023082, ENSECAG00000013749, ENSECAG00000011752, ENSECAG00000033344, ENSECAG00000020652, ENSECAG00000024941, ENSECAG00000021665, ENSECAG00000005838, ENSECAG00000012878, ENSECAG00000011658,…	PIK3R1, AGPAT1, PIK3CA, TFDP2, IP6K2, LPIN2, PLA2G4A, ECI1, DCAF5, SOCS7, HACD3, MBOAT1, ATG14, PIK3R3, ECHDC1, ALG6, SGMS2, MOGAT1, PNPLA8, FAM135A, ACSF3, CHKA, DEGS1, AUH, ACSL3, PTGES3, ABHD16A, PLA2G4A
GO:0031122_cytoplasmic_microtubule_organization	-0.00848	0.012	0.488	0.472	ENSECAG00000020276, ENSECAG00000009648, ENSECAG00000006877, ENSECAG00000019716, ENSECAG00000023466, ENSECAG00000017095	HOOK3, CLIP1, CCDC88A, CCDC88C, SLAIN2, CAMSAP1
GO:0000725_recombinational_repair	-0.215	-0.249	0.488	0.472	ENSECAG00000010827, ENSECAG00000013845, ENSECAG00000018233, ENSECAG00000022964, ENSECAG00000018454, ENSECAG00000016392, ENSECAG00000008840, ENSECAG00000014368, ENSECAG00000019809, ENSECAG00000019631, ENSECAG00000003634, ENSECAG00000024215, ENSECAG00000018676, ENSECAG00000020517, ENSECAG00000010336, ENSECAG00000016773, ENSECAG00000008391, ENSECAG00000014890, ENSECAG00000010367, ENSECAG00000022502	TEX15, HUS1, NIPBL, CDC7, RBBP8, RAD21, MCM6, MCM5, CGAS, MCM2, RHNO1, GINS2, RAD52, GINS4, NUCKS1, NABP1, PALB2, BRCA2, RAD51AP1, REV3L
GO:0070647_protein_modification_by_small_protein_conjugation_or_removal	-0.0756	-0.101	0.48	0.472	ENSECAG00000011567, ENSECAG00000020286, ENSECAG00000007240, ENSECAG00000014582, ENSECAG00000028965, ENSECAG00000023670, ENSECAG00000000162, ENSECAG00000035031, ENSECAG00000005374, ENSECAG00000002087, ENSECAG00000020071, ENSECAG00000009006, ENSECAG00000018149, ENSECAG00000017183, ENSECAG00000016116, ENSECAG00000015363, ENSECAG00000021385, ENSECAG00000019655, ENSECAG00000022272, ENSECAG00000009988,…	UIMC1, BIRC7, CYLD, UFL1, NEDD8, CUL4B, TRIP12, UBB, WAC, SAE1, XIAP, USP46, RNF20, PCGF6, USP36, KLHL22, HUWE1, SVBP, USP34, FBXO11, BIRC5, KCTD13, TBC1D22B, ARIH1, ANAPC1, UCHL5, PIAS4, USP1, CBLL1, UBE2D1, UBE2E3, USP7, DTX2, PIAS2, FANCL, FBXO32, UBE2S, RNF34, UBE2E1, UBE2K, SENP5, WDR70, UBE2I, ZRANB1, UHRF1, TRAF6, CNOT4, CUL1, UBB, HECTD1, PCGF1, RPS27A, AMFR, KCTD10, SENP3, TOPORS, PIAS1,…
GO:0000469_cleavage_involved_in_rRNA_processing	-0.129	-0.237	0.48	0.472	ENSECAG00000001358, ENSECAG00000024732, ENSECAG00000012606, ENSECAG00000004492, ENSECAG00000014960	BMS1, EXOSC9, EXOSC8, RRS1, ERI3
GO:0006354_DNA-templated_transcription,_elongation	-0.435	-0.552	0.472	0.472	ENSECAG00000030438, ENSECAG00000014898, ENSECAG00000000466, ENSECAG00000015661, ENSECAG00000021686, ENSECAG00000010425, ENSECAG00000018765, ENSECAG00000009118	BRD4, LEO1, ELL, BRDT, SUPT16H, ZNF326, CCNK, OCLN
GO:0032784_regulation_of_DNA-templated_transcription,_elongation	-0.435	-0.552	0.472	0.472	ENSECAG00000030438, ENSECAG00000014898, ENSECAG00000000466, ENSECAG00000015661, ENSECAG00000021686, ENSECAG00000010425, ENSECAG00000018765, ENSECAG00000009118	BRD4, LEO1, ELL, BRDT, SUPT16H, ZNF326, CCNK, OCLN
GO:0019953_sexual_reproduction	-0.387	-0.354	0.496	0.48	ENSECAG00000010827, ENSECAG00000016913, ENSECAG00000010697, ENSECAG00000019961, ENSECAG00000017037, ENSECAG00000022013, ENSECAG00000009748, ENSECAG00000002989, ENSECAG00000007254	TEX15, MEIKIN, ZP4, ZP2, TDRD5, IFTAP, TDRD1, ZP1, IZUMO1R
GO:0044703_multi-organism_reproductive_process	-0.387	-0.354	0.496	0.48	ENSECAG00000010827, ENSECAG00000016913, ENSECAG00000010697, ENSECAG00000019961, ENSECAG00000017037, ENSECAG00000022013, ENSECAG00000009748, ENSECAG00000002989, ENSECAG00000007254	TEX15, MEIKIN, ZP4, ZP2, TDRD5, IFTAP, TDRD1, ZP1, IZUMO1R
GO:0007030_Golgi_organization	-0.388	-0.447	0.496	0.48	ENSECAG00000020144, ENSECAG00000006545, ENSECAG00000020570, ENSECAG00000017911, ENSECAG00000007621, ENSECAG00000040308, ENSECAG00000006321, ENSECAG00000016918, ENSECAG00000006377	UBXN2A, NSFL1C, LMAN1, PDCD10, TRIP11, TMED7, GOLPH3, TMED4, SEC16A
GO:0007064_mitotic_sister_chromatid_cohesion	-0.2	-0.212	0.488	0.48	ENSECAG00000012899, ENSECAG00000018233, ENSECAG00000015641, ENSECAG00000016392, ENSECAG00000016120	ESCO2, NIPBL, DSCC1, RAD21, ESCO1
GO:0006754_ATP_biosynthetic_process	-0.397	-0.588	0.48	0.48	ENSECAG00000024684, ENSECAG00000029282, ENSECAG00000012512, ENSECAG00000009780, ENSECAG00000011722, ENSECAG00000025162, ENSECAG00000028274, ENSECAG00000007968, ENSECAG00000021690	ATP5F1C, UQCRQ, COX6A1, UQCRB, COX4I1, ATP5F1E, NDUFB6, COX5B, NDUFS6
GO:0009142_nucleoside_triphosphate_biosynthetic_process	-0.397	-0.588	0.48	0.48	ENSECAG00000024684, ENSECAG00000029282, ENSECAG00000012512, ENSECAG00000009780, ENSECAG00000011722, ENSECAG00000025162, ENSECAG00000028274, ENSECAG00000007968, ENSECAG00000021690	ATP5F1C, UQCRQ, COX6A1, UQCRB, COX4I1, ATP5F1E, NDUFB6, COX5B, NDUFS6
GO:0009145_purine_nucleoside_triphosphate_biosynthetic_process	-0.397	-0.588	0.48	0.48	ENSECAG00000024684, ENSECAG00000029282, ENSECAG00000012512, ENSECAG00000009780, ENSECAG00000011722, ENSECAG00000025162, ENSECAG00000028274, ENSECAG00000007968, ENSECAG00000021690	ATP5F1C, UQCRQ, COX6A1, UQCRB, COX4I1, ATP5F1E, NDUFB6, COX5B, NDUFS6
GO:0009199_ribonucleoside_triphosphate_metabolic_process	-0.397	-0.588	0.48	0.48	ENSECAG00000024684, ENSECAG00000029282, ENSECAG00000012512, ENSECAG00000009780, ENSECAG00000011722, ENSECAG00000025162, ENSECAG00000028274, ENSECAG00000007968, ENSECAG00000021690	ATP5F1C, UQCRQ, COX6A1, UQCRB, COX4I1, ATP5F1E, NDUFB6, COX5B, NDUFS6
GO:0009201_ribonucleoside_triphosphate_biosynthetic_process	-0.397	-0.588	0.48	0.48	ENSECAG00000024684, ENSECAG00000029282, ENSECAG00000012512, ENSECAG00000009780, ENSECAG00000011722, ENSECAG00000025162, ENSECAG00000028274, ENSECAG00000007968, ENSECAG00000021690	ATP5F1C, UQCRQ, COX6A1, UQCRB, COX4I1, ATP5F1E, NDUFB6, COX5B, NDUFS6
GO:0009205_purine_ribonucleoside_triphosphate_metabolic_process	-0.397	-0.588	0.48	0.48	ENSECAG00000024684, ENSECAG00000029282, ENSECAG00000012512, ENSECAG00000009780, ENSECAG00000011722, ENSECAG00000025162, ENSECAG00000028274, ENSECAG00000007968, ENSECAG00000021690	ATP5F1C, UQCRQ, COX6A1, UQCRB, COX4I1, ATP5F1E, NDUFB6, COX5B, NDUFS6
GO:0009206_purine_ribonucleoside_triphosphate_biosynthetic_process	-0.397	-0.588	0.48	0.48	ENSECAG00000024684, ENSECAG00000029282, ENSECAG00000012512, ENSECAG00000009780, ENSECAG00000011722, ENSECAG00000025162, ENSECAG00000028274, ENSECAG00000007968, ENSECAG00000021690	ATP5F1C, UQCRQ, COX6A1, UQCRB, COX4I1, ATP5F1E, NDUFB6, COX5B, NDUFS6
GO:0015985_energy_coupled_proton_transport,_down_electrochemical_gradient	-0.397	-0.588	0.48	0.48	ENSECAG00000024684, ENSECAG00000029282, ENSECAG00000012512, ENSECAG00000009780, ENSECAG00000011722, ENSECAG00000025162, ENSECAG00000028274, ENSECAG00000007968, ENSECAG00000021690	ATP5F1C, UQCRQ, COX6A1, UQCRB, COX4I1, ATP5F1E, NDUFB6, COX5B, NDUFS6
GO:0015986_proton_motive_force-driven_ATP_synthesis	-0.397	-0.588	0.48	0.48	ENSECAG00000024684, ENSECAG00000029282, ENSECAG00000012512, ENSECAG00000009780, ENSECAG00000011722, ENSECAG00000025162, ENSECAG00000028274, ENSECAG00000007968, ENSECAG00000021690	ATP5F1C, UQCRQ, COX6A1, UQCRB, COX4I1, ATP5F1E, NDUFB6, COX5B, NDUFS6
GO:0022618_ribonucleoprotein_complex_assembly	0.255	0.247	0.464	0.48	ENSECAG00000021065, ENSECAG00000007824, ENSECAG00000009738, ENSECAG00000022215, ENSECAG00000007554, ENSECAG00000026848, ENSECAG00000013295, ENSECAG00000010701, ENSECAG00000017121, ENSECAG00000013983, ENSECAG00000023851, ENSECAG00000013062, ENSECAG00000023932, ENSECAG00000000545, ENSECAG00000030680, ENSECAG00000012597, ENSECAG00000015816, ENSECAG00000013565, ENSECAG00000023316, ENSECAG00000000377,…	RPL5, SNRPD2, RPS19, CRNKL1, GEMIN2, SNRPC, NUFIP1, EIF6, RPF2, PRPF6, SCAF11, RPSA, SRSF6, RUVBL1, SNRPE, EIF5, RPLP0, DDX20, SNRPD3, BRIX1, SFSWAP, PRPF8, SNRPD2, CELF2, RPL10, CELF1, SRPK1, SRPK2, ZNHIT3, SF3B1, LUC7L3, COIL, PTGES3, PIH1D2, RPSA, SNRPD1
GO:0007268_chemical_synaptic_transmission	-0.094	-0.581	0.424	0.48	ENSECAG00000015766, ENSECAG00000013384, ENSECAG00000024272, ENSECAG00000007560, ENSECAG00000012027, ENSECAG00000024990, ENSECAG00000024243, ENSECAG00000011582, ENSECAG00000023111, ENSECAG00000022329, ENSECAG00000009911, ENSECAG00000016434, ENSECAG00000022427, ENSECAG00000012588, ENSECAG00000007129, ENSECAG00000032767, ENSECAG00000014615, ENSECAG00000019015	SNCA, STX3, RIMS1, FXR1, CACNA1E, SLC17A6, GNAS, DLGAP4, CLSTN1, LRRC4C, SLC12A7, RAP1A, UNC13C, DTNBP1, LRP6, FMR1, STX2, GRM8
GO:0098916_anterograde_trans-synaptic_signaling	-0.094	-0.581	0.424	0.48	ENSECAG00000015766, ENSECAG00000013384, ENSECAG00000024272, ENSECAG00000007560, ENSECAG00000012027, ENSECAG00000024990, ENSECAG00000024243, ENSECAG00000011582, ENSECAG00000023111, ENSECAG00000022329, ENSECAG00000009911, ENSECAG00000016434, ENSECAG00000022427, ENSECAG00000012588, ENSECAG00000007129, ENSECAG00000032767, ENSECAG00000014615, ENSECAG00000019015	SNCA, STX3, RIMS1, FXR1, CACNA1E, SLC17A6, GNAS, DLGAP4, CLSTN1, LRRC4C, SLC12A7, RAP1A, UNC13C, DTNBP1, LRP6, FMR1, STX2, GRM8
GO:0099537_trans-synaptic_signaling	-0.094	-0.581	0.424	0.48	ENSECAG00000015766, ENSECAG00000013384, ENSECAG00000024272, ENSECAG00000007560, ENSECAG00000012027, ENSECAG00000024990, ENSECAG00000024243, ENSECAG00000011582, ENSECAG00000023111, ENSECAG00000022329, ENSECAG00000009911, ENSECAG00000016434, ENSECAG00000022427, ENSECAG00000012588, ENSECAG00000007129, ENSECAG00000032767, ENSECAG00000014615, ENSECAG00000019015	SNCA, STX3, RIMS1, FXR1, CACNA1E, SLC17A6, GNAS, DLGAP4, CLSTN1, LRRC4C, SLC12A7, RAP1A, UNC13C, DTNBP1, LRP6, FMR1, STX2, GRM8
GO:0000079_regulation_of_cyclin-dependent_protein_serine/threonine_kinase_activity	-0.0233	-0.135	0.504	0.488	ENSECAG00000021289, ENSECAG00000016020, ENSECAG00000016023, ENSECAG00000020270, ENSECAG00000019369, ENSECAG00000008787, ENSECAG00000014813, ENSECAG00000020161, ENSECAG00000001853, ENSECAG00000015806, ENSECAG00000014113, ENSECAG00000023790	CCNE1, CCNJ, CCNO, CCNE2, CCNF, CCNB3, CCNB2, CCNI, CCNH, CCNB1, CCNG2, MNAT1
GO:0000086_G2/M_transition_of_mitotic_cell_cycle	-0.304	-0.419	0.504	0.488	ENSECAG00000020524, ENSECAG00000013845, ENSECAG00000018235, ENSECAG00000009913, ENSECAG00000021177, ENSECAG00000003872, ENSECAG00000021453, ENSECAG00000025015, ENSECAG00000003029	MRNIP, HUS1, AVEN, CDC6, CDK2, ZNF830, TICRR, CDK4, CDC25C
GO:0010389_regulation_of_G2/M_transition_of_mitotic_cell_cycle	-0.304	-0.419	0.504	0.488	ENSECAG00000020524, ENSECAG00000013845, ENSECAG00000018235, ENSECAG00000009913, ENSECAG00000021177, ENSECAG00000003872, ENSECAG00000021453, ENSECAG00000025015, ENSECAG00000003029	MRNIP, HUS1, AVEN, CDC6, CDK2, ZNF830, TICRR, CDK4, CDC25C
GO:0044839_cell_cycle_G2/M_phase_transition	-0.304	-0.419	0.504	0.488	ENSECAG00000020524, ENSECAG00000013845, ENSECAG00000018235, ENSECAG00000009913, ENSECAG00000021177, ENSECAG00000003872, ENSECAG00000021453, ENSECAG00000025015, ENSECAG00000003029	MRNIP, HUS1, AVEN, CDC6, CDK2, ZNF830, TICRR, CDK4, CDC25C
GO:1902749_regulation_of_cell_cycle_G2/M_phase_transition	-0.304	-0.419	0.504	0.488	ENSECAG00000020524, ENSECAG00000013845, ENSECAG00000018235, ENSECAG00000009913, ENSECAG00000021177, ENSECAG00000003872, ENSECAG00000021453, ENSECAG00000025015, ENSECAG00000003029	MRNIP, HUS1, AVEN, CDC6, CDK2, ZNF830, TICRR, CDK4, CDC25C
GO:0051234_establishment_of_localization	-0.316	-0.522	0.504	0.488	ENSECAG00000019646, ENSECAG00000005207, ENSECAG00000015766, ENSECAG00000024970, ENSECAG00000022330, ENSECAG00000024920, ENSECAG00000013384, ENSECAG00000015360, ENSECAG00000020824, ENSECAG00000036345, ENSECAG00000018130, ENSECAG00000010951, ENSECAG00000014112, ENSECAG00000010873, ENSECAG00000012391, ENSECAG00000015237, ENSECAG00000008013, ENSECAG00000013398, ENSECAG00000015853, ENSECAG00000018333,…	AHI1, RAB4A, SNCA, KCNQ1, ERGIC2, XPO1, STX3, IFT122, EPS15, SNX12, ZFAND6, DNAAF4, SLC20A1, CNIH4, ROMO1, PIBF1, NMB, SLCO3A1, SORT1, EZR, TNPO1, RIMS1, BCAP31, FXR1, GOLGA7, TMEM231, NUP35, TOMM20, ATP5F1C, SYT11, TRAK1, TIMM44, SLC16A1, UQCRQ, SCNN1G, TXNIP, NUF2, CADPS2, DYNLL1, SLC39A10, BNIP3, RAB13, CACNA1E, LMAN1, SNX3, VAMP7, NUSAP1, KCNK10, SCFD1, PTPDC1, NIPBL, KCNN2, RAB11FIP1, SLC48A…
GO:0009968_negative_regulation_of_signal_transduction	-0.188	-0.463	0.488	0.488	ENSECAG00000021147, ENSECAG00000021358, ENSECAG00000011935, ENSECAG00000024797, ENSECAG00000011694, ENSECAG00000009003, ENSECAG00000036584, ENSECAG00000012915, ENSECAG00000016346, ENSECAG00000022379, ENSECAG00000016261, ENSECAG00000017195, ENSECAG00000013680, ENSECAG00000014473, ENSECAG00000011461, ENSECAG00000019560, ENSECAG00000016102, ENSECAG00000017118, ENSECAG00000015502, ENSECAG00000009958,…	ATM, SFRP1, SMURF2, PDE3B, ZNRF3, APC, SKOR1, KCTD13, LEPROT, RNF34, UACA, NPRL3, TLE1, SEC14L1, ARMC10, KCTD10, CHD8, TLE7, RFFL, DUSP1, CAAP1, TSC1, EYA1, PPM1B, PMEPA1, GSK3B, CBLB
GO:0007346_regulation_of_mitotic_cell_cycle	-0.121	-0.342	0.48	0.488	ENSECAG00000014979, ENSECAG00000020524, ENSECAG00000007240, ENSECAG00000031204, ENSECAG00000014575, ENSECAG00000013845, ENSECAG00000018235, ENSECAG00000009913, ENSECAG00000021452, ENSECAG00000021177, ENSECAG00000013188, ENSECAG00000011630, ENSECAG00000003872, ENSECAG00000018367, ENSECAG00000021453, ENSECAG00000025015, ENSECAG00000003029, ENSECAG00000000235, ENSECAG00000003460, ENSECAG00000010047,…	AFAP1L2, MRNIP, CYLD, PIM3, RB1, HUS1, AVEN, CDC6, BUB1B, CDK2, CDCA2, FBXO5, ZNF830, ZWILCH, TICRR, CDK4, CDC25C, MTBP, CKS1B, BUB3, CDC26, BTG4, NABP1, TTK, BUB1
GO:1905818_regulation_of_chromosome_separation	-0.363	-0.553	0.472	0.488	ENSECAG00000007006, ENSECAG00000021452, ENSECAG00000018367, ENSECAG00000014130, ENSECAG00000010047, ENSECAG00000023776, ENSECAG00000017103	ANAPC1, BUB1B, ZWILCH, CSNK2A2, BUB3, TTK, BUB1
GO:2001020_regulation_of_response_to_DNA_damage_stimulus	0.319	-0.341	0.424	0.488	ENSECAG00000011567, ENSECAG00000010827, ENSECAG00000007560, ENSECAG00000022081, ENSECAG00000012903, ENSECAG00000012231, ENSECAG00000019809, ENSECAG00000019133, ENSECAG00000032767, ENSECAG00000008636, ENSECAG00000033949	UIMC1, TEX15, FXR1, PARG, WDR76, DEK, CGAS, TIGAR, FMR1, EYA1, OTUB1
GO:1902275_regulation_of_chromatin_organization	-0.289	-0.352	0.536	0.496	ENSECAG00000007955, ENSECAG00000022565, ENSECAG00000010736, ENSECAG00000011055, ENSECAG00000009651	HNRNPU, ATF7IP2, RESF1, SPTY2D1, TASOR
GO:0033047_regulation_of_mitotic_sister_chromatid_segregation	-0.213	-0.443	0.528	0.496	ENSECAG00000007955, ENSECAG00000021452, ENSECAG00000018367, ENSECAG00000010047, ENSECAG00000023776, ENSECAG00000017103	HNRNPU, BUB1B, ZWILCH, BUB3, TTK, BUB1
GO:2001251_negative_regulation_of_chromosome_organization	-0.213	-0.443	0.528	0.496	ENSECAG00000007955, ENSECAG00000021452, ENSECAG00000018367, ENSECAG00000010047, ENSECAG00000023776, ENSECAG00000017103	HNRNPU, BUB1B, ZWILCH, BUB3, TTK, BUB1
GO:0042221_response_to_chemical	-0.311	-0.571	0.52	0.496	ENSECAG00000023233, ENSECAG00000024205, ENSECAG00000019837, ENSECAG00000019993, ENSECAG00000011935, ENSECAG00000013569, ENSECAG00000019408, ENSECAG00000012970, ENSECAG00000013300, ENSECAG00000019725, ENSECAG00000000138, ENSECAG00000023274, ENSECAG00000016551, ENSECAG00000006280, ENSECAG00000013706, ENSECAG00000029421, ENSECAG00000024243, ENSECAG00000036584, ENSECAG00000024602, ENSECAG00000016346,…	BMP15, HSPA5, PIK3R1, KALRN, SMURF2, LAMTOR3, CAT, FAF2, CXCL10, SYT11, ACVR2A, LAMA5, RAB13, LPIN2, SMAD6, HSPA2, GNAS, SKOR1, RNF111, LEPROT, THRA, EPAS1, SDCBP, RRAGA, SMAD1, DERL2, NGF, IRAK2, HSPA8, SMAD2, ERBIN, CANX, PIK3R3, CGAS, LYPD1, ADH5, LAMTOR5, RNF175, REL, SMAD3, ADIPOR2, LIFR, ADH5, TRAF6, SMAD5, NOTCH1, TICAM2, KIF5B, RAP1A, EIF4E1B, AMFR, FGF16, JAK1, JKAMP, SELENOS, CPNE3, SER…
GO:0006399_tRNA_metabolic_process	-0.404	-0.396	0.512	0.496	ENSECAG00000025168, ENSECAG00000013424, ENSECAG00000000279, ENSECAG00000014964, ENSECAG00000011118, ENSECAG00000024919, ENSECAG00000020854, ENSECAG00000020504, ENSECAG00000024732, ENSECAG00000012606, ENSECAG00000012600, ENSECAG00000007177, ENSECAG00000008963, ENSECAG00000002091, ENSECAG00000023052, ENSECAG00000002016, ENSECAG00000023086, ENSECAG00000033970, ENSECAG00000022576, ENSECAG00000024197	ELAC2, KARS1, FARS2, MRPL39, GATC, CDKAL1, TARS1, THADA, EXOSC9, EXOSC8, RTRAF, TRUB1, LARS1, QTRT2, POLG2, THUMPD3, FARSB, TRMT112, IARS2, DARS1
GO:0007093_mitotic_cell_cycle_checkpoint_signaling	-0.0823	-0.335	0.496	0.496	ENSECAG00000020524, ENSECAG00000013845, ENSECAG00000009913, ENSECAG00000021452, ENSECAG00000003872, ENSECAG00000018367, ENSECAG00000021453, ENSECAG00000010047, ENSECAG00000016773, ENSECAG00000023776, ENSECAG00000017103	MRNIP, HUS1, CDC6, BUB1B, ZNF830, ZWILCH, TICRR, BUB3, NABP1, TTK, BUB1
GO:1902531_regulation_of_intracellular_signal_transduction	-0.174	-0.436	0.496	0.496	ENSECAG00000021147, ENSECAG00000013186, ENSECAG00000007240, ENSECAG00000013569, ENSECAG00000017234, ENSECAG00000024797, ENSECAG00000009706, ENSECAG00000005374, ENSECAG00000023011, ENSECAG00000017911, ENSECAG00000015363, ENSECAG00000024243, ENSECAG00000021238, ENSECAG00000012915, ENSECAG00000014081, ENSECAG00000007654, ENSECAG00000005729, ENSECAG00000008715, ENSECAG00000020281, ENSECAG00000017840,…	ATM, WWC3, CYLD, LAMTOR3, ARHGAP17, PDE3B, AKAP13, WAC, RIPK2, PDCD10, KLHL22, GNAS, IGF1R, KCTD13, WWC1, KLHDC10, RRAGA, TMEM9B, PAK2, PAK1, WDR76, UACA, ARHGEF28, MAP4K4, NPRL3, LAMTOR5, SEC14L1, TRAF6, TICAM2, EPS8, ARMC10, KCTD10, TMED4, SH3RF1, LAMTOR1, WWC2, DUSP1, TSC1, LAMTOR4, PAK5, PPM1B, TAOK3, ARHGAP18, NET1
GO:0009056_catabolic_process	-0.349	-0.695	0.488	0.496	ENSECAG00000005798, ENSECAG00000020144, ENSECAG00000024205, ENSECAG00000001582, ENSECAG00000006545, ENSECAG00000018988, ENSECAG00000014582, ENSECAG00000028965, ENSECAG00000011935, ENSECAG00000017022, ENSECAG00000020881, ENSECAG00000000162, ENSECAG00000011728, ENSECAG00000035031, ENSECAG00000010812, ENSECAG00000011878, ENSECAG00000019408, ENSECAG00000007560, ENSECAG00000012970, ENSECAG00000024327,…	CNOT7, UBXN2A, HSPA5, CNOT6L, NSFL1C, XRN2, UFL1, NEDD8, SMURF2, UPF2, CTSC, TRIP12, PYGL, UBB, EDC4, DTL, CAT, FXR1, FAF2, FBXL5, WAC, ZNRF3, YTHDF1, ELOC, LPIN2, ZCCHC17, PLA2G4A, KLHL22, PCYOX1L, HUWE1, APC, ABHD17A, ATG5, GNPDA2, HNRNPU, FBXO11, RNF111, ECI1, ABHD17B, WIPI2, KCTD13, ATG12, TBC1D22B, ARIH1, FBXO45, YTHDF2, ANAPC1, BFAR, RNF130, TBC1D14, PCNA, EXOSC9, ATG3, ATG2B, PM20D2, SAMD4…
GO:0019725_cellular_homeostasis	-0.0797	-0.0791	0.472	0.496	ENSECAG00000008450, ENSECAG00000023584, ENSECAG00000006518, ENSECAG00000012027, ENSECAG00000028645, ENSECAG00000008683, ENSECAG00000000767, ENSECAG00000040743, ENSECAG00000020120, ENSECAG00000016301, ENSECAG00000024623, ENSECAG00000009911, ENSECAG00000022582, ENSECAG00000007671, ENSECAG00000011541, ENSECAG00000024593, ENSECAG00000005267, ENSECAG00000016494, ENSECAG00000008678, ENSECAG00000014216,…	ATP2B1, DMXL1, SLC39A10, CACNA1E, SELENOT, FTH1, SLC4A7, SELENOK, PLAA, MCUB, ATP1A1, SLC12A7, FBXW7, ATP2A2, PRDX2, SLC35G1, BAG3, MICU2, PRDX1, ATP6AP1, SLC39A6, ATP1B1
GO:0051604_protein_maturation	-0.181	-0.159	0.472	0.496	ENSECAG00000011455, ENSECAG00000006788, ENSECAG00000019913, ENSECAG00000012609, ENSECAG00000022357, ENSECAG00000019104, ENSECAG00000016480, ENSECAG00000015497, ENSECAG00000012998, ENSECAG00000013676, ENSECAG00000013999, ENSECAG00000014253, ENSECAG00000007179, ENSECAG00000007773	PHEX, PCSK5, FURIN, NAA20, EIF4E1B, REN, SPCS3, NAA16, APH1A, CAST, TSPAN3, PMPCB, SPCS2, ZMPSTE24
GO:0060491_regulation_of_cell_projection_assembly	0.191	-0.581	0.4	0.496	ENSECAG00000007560, ENSECAG00000022058, ENSECAG00000014922, ENSECAG00000011337, ENSECAG00000032767, ENSECAG00000010463	FXR1, ODF2L, EPS8, ODF2, FMR1, ENTR1
GO:0006820_anion_transport	-0.619	-0.542	0.536	0.504	ENSECAG00000014112, ENSECAG00000013398, ENSECAG00000021627, ENSECAG00000024990, ENSECAG00000000767, ENSECAG00000013480, ENSECAG00000022060, ENSECAG00000013738, ENSECAG00000009911, ENSECAG00000028359, ENSECAG00000009100, ENSECAG00000011808, ENSECAG00000015601, ENSECAG00000009611	SLC20A1, SLCO3A1, SLC16A1, SLC17A6, SLC4A7, ANO4, SLC25A32, SLC25A13, SLC12A7, SLC25A5, SLCO4C1, SLC25A22, XPR1, SLC15A4
GO:0007338_single_fertilization	-0.504	-0.445	0.528	0.504	ENSECAG00000010697, ENSECAG00000019961, ENSECAG00000022013, ENSECAG00000002989, ENSECAG00000007254	ZP4, ZP2, IFTAP, ZP1, IZUMO1R
GO:0009566_fertilization	-0.504	-0.445	0.528	0.504	ENSECAG00000010697, ENSECAG00000019961, ENSECAG00000022013, ENSECAG00000002989, ENSECAG00000007254	ZP4, ZP2, IFTAP, ZP1, IZUMO1R
GO:0060627_regulation_of_vesicle-mediated_transport	-0.317	-0.429	0.52	0.504	ENSECAG00000005207, ENSECAG00000018333, ENSECAG00000019725, ENSECAG00000024021, ENSECAG00000016551, ENSECAG00000009730, ENSECAG00000017044, ENSECAG00000012900, ENSECAG00000016434, ENSECAG00000017553, ENSECAG00000012588, ENSECAG00000019987, ENSECAG00000019039, ENSECAG00000009566, ENSECAG00000002920, ENSECAG00000008614	RAB4A, EZR, SYT11, CADPS2, RAB13, SAR1A, RALA, MSN, RAP1A, SEPTIN2, DTNBP1, GRIPAP1, CNST, GOPC, RDX, LLGL2
GO:0006753_nucleoside_phosphate_metabolic_process	-0.416	-0.549	0.52	0.504	ENSECAG00000024684, ENSECAG00000029282, ENSECAG00000023644, ENSECAG00000007464, ENSECAG00000023269, ENSECAG00000021678, ENSECAG00000017534, ENSECAG00000017251, ENSECAG00000012512, ENSECAG00000008959, ENSECAG00000009708, ENSECAG00000018813, ENSECAG00000019133, ENSECAG00000009780, ENSECAG00000011722, ENSECAG00000023847, ENSECAG00000023658, ENSECAG00000019319, ENSECAG00000007644, ENSECAG00000025162,…	ATP5F1C, UQCRQ, PPAT, RRM2, GMPS, PAPSS1, HPRT1, PARK7, COX6A1, SAMHD1, UMPS, GUCY2C, TIGAR, UQCRB, COX4I1, RRM1, NUDT5, NUDT4, PKM, ATP5F1E, NAMPT, TYMS, PANK3, NDUFB6, COX5B, NDUFS6, FAR1, ACSL3, SUCLA2, ACOT9
GO:1902903_regulation_of_supramolecular_fiber_organization	0.102	0.0251	0.512	0.504	ENSECAG00000017894, ENSECAG00000013629, ENSECAG00000024334, ENSECAG00000018435, ENSECAG00000009003, ENSECAG00000000050, ENSECAG00000009648, ENSECAG00000009190, ENSECAG00000021545, ENSECAG00000000529, ENSECAG00000013136, ENSECAG00000022286, ENSECAG00000012734, ENSECAG00000023466, ENSECAG00000023388, ENSECAG00000015172, ENSECAG00000017095, ENSECAG00000024764, ENSECAG00000022222	CKAP2, ADD3, CARMIL1, WDR1, APC, WASF3, CLIP1, TMSB4X, MTSS1, MAP1S, ADD1, ARFIP1, BAIAP2L1, SLAIN2, ARPIN, SSH2, CAMSAP1, ARHGAP18, WASF1
GO:0000956_nuclear-transcribed_mRNA_catabolic_process	-0.484	-0.752	0.512	0.504	ENSECAG00000005798, ENSECAG00000001582, ENSECAG00000018988, ENSECAG00000017022, ENSECAG00000010812, ENSECAG00000024732, ENSECAG00000015551, ENSECAG00000023181, ENSECAG00000012606, ENSECAG00000017141, ENSECAG00000012956, ENSECAG00000009759, ENSECAG00000004313, ENSECAG00000016947	CNOT7, CNOT6L, XRN2, UPF2, EDC4, EXOSC9, SAMD4B, CNOT3, EXOSC8, UPF3A, DCPS, TNRC6B, SMG7, UPF3B
GO:0031570_DNA_integrity_checkpoint_signaling	-0.25	-0.392	0.504	0.504	ENSECAG00000021147, ENSECAG00000020524, ENSECAG00000013845, ENSECAG00000009913, ENSECAG00000012903, ENSECAG00000003634, ENSECAG00000004590, ENSECAG00000003872, ENSECAG00000021453	ATM, MRNIP, HUS1, CDC6, WDR76, RHNO1, TIPIN, ZNF830, TICRR
GO:0032786_positive_regulation_of_DNA-templated_transcription,_elongation	-0.43	-0.552	0.504	0.504	ENSECAG00000030438, ENSECAG00000014898, ENSECAG00000000466, ENSECAG00000015661, ENSECAG00000021686, ENSECAG00000018765, ENSECAG00000009118	BRD4, LEO1, ELL, BRDT, SUPT16H, CCNK, OCLN
GO:0034220_ion_transmembrane_transport	-0.518	-0.617	0.504	0.504	ENSECAG00000024970, ENSECAG00000014112, ENSECAG00000024684, ENSECAG00000029282, ENSECAG00000021259, ENSECAG00000006518, ENSECAG00000012027, ENSECAG00000023360, ENSECAG00000020082, ENSECAG00000019132, ENSECAG00000041537, ENSECAG00000013480, ENSECAG00000022060, ENSECAG00000016301, ENSECAG00000013738, ENSECAG00000024623, ENSECAG00000009911, ENSECAG00000028359, ENSECAG00000010585, ENSECAG00000012512,…	KCNQ1, SLC20A1, ATP5F1C, UQCRQ, SCNN1G, SLC39A10, CACNA1E, KCNK10, KCNN2, SLMAP, FXYD6, ANO4, SLC25A32, MCUB, SLC25A13, ATP1A1, SLC12A7, SLC25A5, KCNK7, COX6A1, NEDD4L, ATP2A2, UQCRB, COX4I1, SLC35G1, MICU2, SLC25A22, ATP5F1E, WNK1, NDUFB6, KCNK1, COX5B, NDUFS6, SLC39A6, ATP1B1
GO:0006119_oxidative_phosphorylation	-0.478	-0.66	0.504	0.504	ENSECAG00000029282, ENSECAG00000012512, ENSECAG00000009780, ENSECAG00000011722, ENSECAG00000025162, ENSECAG00000028274, ENSECAG00000007968, ENSECAG00000021690	UQCRQ, COX6A1, UQCRB, COX4I1, ATP5F1E, NDUFB6, COX5B, NDUFS6
GO:0034654_nucleobase-containing_compound_biosynthetic_process	-0.172	-0.672	0.504	0.504	ENSECAG00000024766, ENSECAG00000021000, ENSECAG00000013186, ENSECAG00000024130, ENSECAG00000022262, ENSECAG00000000648, ENSECAG00000014979, ENSECAG00000011749, ENSECAG00000011357, ENSECAG00000007240, ENSECAG00000024605, ENSECAG00000012780, ENSECAG00000022110, ENSECAG00000006101, ENSECAG00000005699, ENSECAG00000016520, ENSECAG00000018169, ENSECAG00000014283, ENSECAG00000017503, ENSECAG00000030438,…	CREBBP, PAX6, WWC3, ZNF609, BRWD1, LCORL, AFAP1L2, MSX2, GATAD2B, CYLD, SIN3A, CBX3, ASXL1, ZBTB39, SERTAD3, ZHX3, RREB1, NCOA7, BNC2, BRD4, ATF2, HMGB3, DRGX, HEY2, BRD7, CAMTA1, GTF2A2, EGR1, ZFHX4, AKAP13, CREB3L2, NUP35, ATP5F1C, SFPQ, HEATR1, SOHLH2, UQCRQ, CDK7, FOXO1, BRWD3, NOC3L, RIPK2, PCGF6, PHF1, TADA2A, NSD3, TET3, ELK3, LPIN2, ARID4A, TRPS1, WBP2, PPAT, TBP, MED13, SMAD6, HMX1, MTA3…
GO:0071826_ribonucleoprotein_complex_subunit_organization	0.209	0.209	0.496	0.504	ENSECAG00000021065, ENSECAG00000019601, ENSECAG00000007824, ENSECAG00000009738, ENSECAG00000022215, ENSECAG00000007554, ENSECAG00000026848, ENSECAG00000013295, ENSECAG00000010701, ENSECAG00000017121, ENSECAG00000013983, ENSECAG00000023851, ENSECAG00000013062, ENSECAG00000019839, ENSECAG00000023932, ENSECAG00000000545, ENSECAG00000030680, ENSECAG00000012597, ENSECAG00000015816, ENSECAG00000013565,…	RPL5, DHX8, SNRPD2, RPS19, CRNKL1, GEMIN2, SNRPC, NUFIP1, EIF6, RPF2, PRPF6, SCAF11, RPSA, DNAJC17, SRSF6, RUVBL1, SNRPE, EIF5, RPLP0, DDX20, SNRPD3, BRIX1, SFSWAP, PRPF8, SNRPD2, CELF2, RPL10, CELF1, SRPK1, SRPK2, ZNHIT3, SF3B1, LUC7L3, COIL, PTGES3, PIH1D2, RPSA, SNRPD1
GO:0007019_microtubule_depolymerization	-0.148	-0.219	0.496	0.504	ENSECAG00000017894, ENSECAG00000016155, ENSECAG00000009003, ENSECAG00000023019, ENSECAG00000000529, ENSECAG00000017122, ENSECAG00000017095	CKAP2, KIF18A, APC, KIF18B, MAP1S, NCKAP5, CAMSAP1
GO:0042327_positive_regulation_of_phosphorylation	-0.141	-0.77	0.424	0.504	ENSECAG00000023233, ENSECAG00000017056, ENSECAG00000007560, ENSECAG00000017911, ENSECAG00000021238, ENSECAG00000020015, ENSECAG00000015053, ENSECAG00000010553, ENSECAG00000024659, ENSECAG00000011752, ENSECAG00000015006, ENSECAG00000023795, ENSECAG00000022567, ENSECAG00000031442, ENSECAG00000021088, ENSECAG00000032767	BMP15, BTBD10, FXR1, PDCD10, IGF1R, BMP6, SDCBP, NGF, PRRC1, ATG14, FGFR1, MOB1B, RACK1, FGF16, GDF9, FMR1
GO:0031098_stress-activated_protein_kinase_signaling_cascade	-0.442	-0.539	0.544	0.512	ENSECAG00000021238, ENSECAG00000007654, ENSECAG00000021091, ENSECAG00000021240, ENSECAG00000009958	IGF1R, KLHDC10, TRAF6, SH3RF1, DUSP1
GO:0032872_regulation_of_stress-activated_MAPK_cascade	-0.442	-0.539	0.544	0.512	ENSECAG00000021238, ENSECAG00000007654, ENSECAG00000021091, ENSECAG00000021240, ENSECAG00000009958	IGF1R, KLHDC10, TRAF6, SH3RF1, DUSP1
GO:0051403_stress-activated_MAPK_cascade	-0.442	-0.539	0.544	0.512	ENSECAG00000021238, ENSECAG00000007654, ENSECAG00000021091, ENSECAG00000021240, ENSECAG00000009958	IGF1R, KLHDC10, TRAF6, SH3RF1, DUSP1
GO:0070302_regulation_of_stress-activated_protein_kinase_signaling_cascade	-0.442	-0.539	0.544	0.512	ENSECAG00000021238, ENSECAG00000007654, ENSECAG00000021091, ENSECAG00000021240, ENSECAG00000009958	IGF1R, KLHDC10, TRAF6, SH3RF1, DUSP1
GO:0007088_regulation_of_mitotic_nuclear_division	0.0861	-0.106	0.512	0.512	ENSECAG00000021452, ENSECAG00000013188, ENSECAG00000011630, ENSECAG00000018367, ENSECAG00000010047, ENSECAG00000023776, ENSECAG00000017103	BUB1B, CDCA2, FBXO5, ZWILCH, BUB3, TTK, BUB1
GO:0055080_cation_homeostasis	-0.207	-0.23	0.504	0.512	ENSECAG00000008450, ENSECAG00000023584, ENSECAG00000024327, ENSECAG00000006518, ENSECAG00000012027, ENSECAG00000008683, ENSECAG00000000767, ENSECAG00000040743, ENSECAG00000016301, ENSECAG00000024623, ENSECAG00000009911, ENSECAG00000007671, ENSECAG00000024593, ENSECAG00000016494, ENSECAG00000014216, ENSECAG00000008456, ENSECAG00000017771	ATP2B1, DMXL1, FBXL5, SLC39A10, CACNA1E, FTH1, SLC4A7, SELENOK, MCUB, ATP1A1, SLC12A7, ATP2A2, SLC35G1, MICU2, ATP6AP1, SLC39A6, ATP1B1
GO:0098771_inorganic_ion_homeostasis	-0.207	-0.23	0.504	0.512	ENSECAG00000008450, ENSECAG00000023584, ENSECAG00000024327, ENSECAG00000006518, ENSECAG00000012027, ENSECAG00000008683, ENSECAG00000000767, ENSECAG00000040743, ENSECAG00000016301, ENSECAG00000024623, ENSECAG00000009911, ENSECAG00000007671, ENSECAG00000024593, ENSECAG00000016494, ENSECAG00000014216, ENSECAG00000008456, ENSECAG00000017771	ATP2B1, DMXL1, FBXL5, SLC39A10, CACNA1E, FTH1, SLC4A7, SELENOK, MCUB, ATP1A1, SLC12A7, ATP2A2, SLC35G1, MICU2, ATP6AP1, SLC39A6, ATP1B1
GO:0009059_macromolecule_biosynthetic_process	-0.257	-0.837	0.488	0.512	ENSECAG00000024766, ENSECAG00000005798, ENSECAG00000021000, ENSECAG00000013186, ENSECAG00000024130, ENSECAG00000022262, ENSECAG00000000648, ENSECAG00000014979, ENSECAG00000011749, ENSECAG00000013424, ENSECAG00000001582, ENSECAG00000011357, ENSECAG00000007240, ENSECAG00000024605, ENSECAG00000012780, ENSECAG00000022110, ENSECAG00000006101, ENSECAG00000005699, ENSECAG00000016520, ENSECAG00000018169,…	CREBBP, CNOT7, PAX6, WWC3, ZNF609, BRWD1, LCORL, AFAP1L2, MSX2, KARS1, CNOT6L, GATAD2B, CYLD, SIN3A, CBX3, ASXL1, ZBTB39, SERTAD3, ZHX3, RREB1, FARS2, NCOA7, BNC2, BRD4, MRPL39, ATF2, HMGB3, DRGX, HEY2, ZAR1L, BRD7, CAMTA1, GTF2A2, FXR1, GOLGA7, EGR1, ZFHX4, AKAP13, CREB3L2, NUP35, STT3A, SFPQ, HEATR1, SOHLH2, RPL26, CDK7, FOXO1, MRPS16, BRWD3, YTHDF1, NOC3L, RIPK2, PCGF6, PHF1, TADA2A, NSD3, TET…
GO:0034645_cellular_macromolecule_biosynthetic_process	-0.257	-0.837	0.488	0.512	ENSECAG00000024766, ENSECAG00000005798, ENSECAG00000021000, ENSECAG00000013186, ENSECAG00000024130, ENSECAG00000022262, ENSECAG00000000648, ENSECAG00000014979, ENSECAG00000011749, ENSECAG00000013424, ENSECAG00000001582, ENSECAG00000011357, ENSECAG00000007240, ENSECAG00000024605, ENSECAG00000012780, ENSECAG00000022110, ENSECAG00000006101, ENSECAG00000005699, ENSECAG00000016520, ENSECAG00000018169,…	CREBBP, CNOT7, PAX6, WWC3, ZNF609, BRWD1, LCORL, AFAP1L2, MSX2, KARS1, CNOT6L, GATAD2B, CYLD, SIN3A, CBX3, ASXL1, ZBTB39, SERTAD3, ZHX3, RREB1, FARS2, NCOA7, BNC2, BRD4, MRPL39, ATF2, HMGB3, DRGX, HEY2, ZAR1L, BRD7, CAMTA1, GTF2A2, FXR1, GOLGA7, EGR1, ZFHX4, AKAP13, CREB3L2, NUP35, STT3A, SFPQ, HEATR1, SOHLH2, RPL26, CDK7, FOXO1, MRPS16, BRWD3, YTHDF1, NOC3L, RIPK2, PCGF6, PHF1, TADA2A, NSD3, TET…
GO:0044782_cilium_organization	-0.157	-0.406	0.48	0.512	ENSECAG00000019646, ENSECAG00000015360, ENSECAG00000010951, ENSECAG00000015237, ENSECAG00000023433, ENSECAG00000008104, ENSECAG00000012044, ENSECAG00000011655, ENSECAG00000022693, ENSECAG00000014459, ENSECAG00000014240, ENSECAG00000022058, ENSECAG00000011438, ENSECAG00000020710, ENSECAG00000022600, ENSECAG00000024050, ENSECAG00000009886, ENSECAG00000020513, ENSECAG00000016999, ENSECAG00000019106,…	AHI1, IFT122, DNAAF4, PIBF1, TMEM231, DYNLL1, PTPDC1, PCM1, SEPTIN7, ARL13B, IFT46, ODF2L, IFT57, DRC1, SPAG1, SCLT1, TRAF3IP1, CEP89, CEP20, IQCB1, OFD1, SEPTIN2, BBS5, CENPJ, FAM161A, ODF2, IFT74, BBS7, HYLS1, CEP41, LCA5, CCDC66, CFAP20, IFT88, FBXW8, ENTR1
GO:0050803_regulation_of_synapse_structure_or_activity	-0.128	-0.894	0.424	0.512	ENSECAG00000007560, ENSECAG00000024990, ENSECAG00000023111, ENSECAG00000019987, ENSECAG00000032767	FXR1, SLC17A6, CLSTN1, GRIPAP1, FMR1
GO:0031123_RNA_3'-end_processing	-0.212	-0.174	0.56	0.52	ENSECAG00000025168, ENSECAG00000014831, ENSECAG00000009859, ENSECAG00000024732, ENSECAG00000010911, ENSECAG00000021027, ENSECAG00000012606, ENSECAG00000023935, ENSECAG00000011689, ENSECAG00000023524, ENSECAG00000000691, ENSECAG00000018683, ENSECAG00000040006, ENSECAG00000019415, ENSECAG00000014960	ELAC2, TUT7, PAPOLG, EXOSC9, INTS12, PAPOLA, EXOSC8, CPSF2, SLBP, DKC1, WDR33, PCF11, SLBP2, FIP1L1, ERI3
GO:0061025_membrane_fusion	-0.291	-0.375	0.536	0.52	ENSECAG00000013384, ENSECAG00000020144, ENSECAG00000006545, ENSECAG00000024272, ENSECAG00000019725, ENSECAG00000024021, ENSECAG00000016551, ENSECAG00000014117, ENSECAG00000016134, ENSECAG00000023865, ENSECAG00000017044, ENSECAG00000019923, ENSECAG00000019791, ENSECAG00000016434, ENSECAG00000022427, ENSECAG00000017553, ENSECAG00000012588, ENSECAG00000040193, ENSECAG00000008168, ENSECAG00000017772,…	STX3, UBXN2A, NSFL1C, RIMS1, SYT11, CADPS2, RAB13, VAMP7, RAB11FIP1, RAB11A, RALA, STX7, RAB11FIP2, RAP1A, UNC13C, SEPTIN2, DTNBP1, GOSR1, EXOC5, STX8, RAB7A, EXOC3, RAB3IP, IZUMO1R, STX2, STX6, LLGL2
GO:0045934_negative_regulation_of_nucleobase-containing_compound_metabolic_process	-0.182	-0.545	0.52	0.52	ENSECAG00000011357, ENSECAG00000024605, ENSECAG00000012780, ENSECAG00000006101, ENSECAG00000028670, ENSECAG00000025040, ENSECAG00000032622, ENSECAG00000023512, ENSECAG00000000178, ENSECAG00000007955, ENSECAG00000036584, ENSECAG00000023366, ENSECAG00000007205, ENSECAG00000006289, ENSECAG00000016028, ENSECAG00000020475, ENSECAG00000023322, ENSECAG00000011120, ENSECAG00000010349, ENSECAG00000013508,…	GATAD2B, SIN3A, CBX3, ZBTB39, DPPA3, ZCCHC17, HMX1, MTA3, RUNX1T1, HNRNPU, SKOR1, SUDS3, ZBTB33, NCOR1, N4BP2L2, MIER1, ID3, THRA, CIART, SAP18, BRMS1, H1-3, ANGEL2, ZNF684, CGAS, PER2, DNMT3A, GATAD2A, SMARCE1, NR1H2, CBFA2T2, SYNCRIP, PCGF1, LDB1, CHD8, MTA2, TIGAR, SAP130, CTCF, BCL6B, NKAP, LYAR, URI1, PCGF2, PHF21A, POT1, CIR1, CHD4, VGLL4, H1-4, CBX1, OTUB1, CBX5
GO:0010648_negative_regulation_of_cell_communication	-0.267	-0.547	0.52	0.52	ENSECAG00000021147, ENSECAG00000021358, ENSECAG00000011935, ENSECAG00000024797, ENSECAG00000011694, ENSECAG00000009003, ENSECAG00000036584, ENSECAG00000012915, ENSECAG00000016346, ENSECAG00000022379, ENSECAG00000016261, ENSECAG00000017195, ENSECAG00000013680, ENSECAG00000014473, ENSECAG00000016434, ENSECAG00000011461, ENSECAG00000019560, ENSECAG00000016102, ENSECAG00000017118, ENSECAG00000015502,…	ATM, SFRP1, SMURF2, PDE3B, ZNRF3, APC, SKOR1, KCTD13, LEPROT, RNF34, UACA, NPRL3, TLE1, SEC14L1, RAP1A, ARMC10, KCTD10, CHD8, TLE7, RFFL, DUSP1, CAAP1, TSC1, EYA1, PPM1B, PMEPA1, GSK3B, CBLB
GO:0023057_negative_regulation_of_signaling	-0.267	-0.547	0.52	0.52	ENSECAG00000021147, ENSECAG00000021358, ENSECAG00000011935, ENSECAG00000024797, ENSECAG00000011694, ENSECAG00000009003, ENSECAG00000036584, ENSECAG00000012915, ENSECAG00000016346, ENSECAG00000022379, ENSECAG00000016261, ENSECAG00000017195, ENSECAG00000013680, ENSECAG00000014473, ENSECAG00000016434, ENSECAG00000011461, ENSECAG00000019560, ENSECAG00000016102, ENSECAG00000017118, ENSECAG00000015502,…	ATM, SFRP1, SMURF2, PDE3B, ZNRF3, APC, SKOR1, KCTD13, LEPROT, RNF34, UACA, NPRL3, TLE1, SEC14L1, RAP1A, ARMC10, KCTD10, CHD8, TLE7, RFFL, DUSP1, CAAP1, TSC1, EYA1, PPM1B, PMEPA1, GSK3B, CBLB
GO:0000075_cell_cycle_checkpoint_signaling	-0.345	-0.588	0.504	0.52	ENSECAG00000021147, ENSECAG00000020524, ENSECAG00000013845, ENSECAG00000009913, ENSECAG00000012903, ENSECAG00000021452, ENSECAG00000003634, ENSECAG00000004590, ENSECAG00000003872, ENSECAG00000018367, ENSECAG00000021453, ENSECAG00000010047, ENSECAG00000016773, ENSECAG00000023776, ENSECAG00000017103	ATM, MRNIP, HUS1, CDC6, WDR76, BUB1B, RHNO1, TIPIN, ZNF830, ZWILCH, TICRR, BUB3, NABP1, TTK, BUB1
GO:0023051_regulation_of_signaling	-0.158	-0.745	0.48	0.52	ENSECAG00000012810, ENSECAG00000021147, ENSECAG00000013186, ENSECAG00000023233, ENSECAG00000014979, ENSECAG00000021358, ENSECAG00000007240, ENSECAG00000011935, ENSECAG00000008013, ENSECAG00000013569, ENSECAG00000017234, ENSECAG00000024272, ENSECAG00000007560, ENSECAG00000024797, ENSECAG00000009706, ENSECAG00000005374, ENSECAG00000011694, ENSECAG00000006518, ENSECAG00000023011, ENSECAG00000017911,…	TNKS2, ATM, WWC3, BMP15, AFAP1L2, SFRP1, CYLD, SMURF2, NMB, LAMTOR3, ARHGAP17, RIMS1, FXR1, PDE3B, AKAP13, WAC, ZNRF3, SLC39A10, RIPK2, PDCD10, KLHL22, CSNK1G2, APC, GNAS, SKOR1, RNF111, LURAP1L, IGF1R, KCTD13, LEPROT, BMP6, WWC1, DLGAP4, KLHDC10, CLSTN1, SDCBP, RRAGA, TMEM9B, PAK2, PAK1, RNF34, WDR76, LRRC4C, UACA, ARHGEF28, MAP4K4, NPRL3, TLE1, LAMTOR5, SEC14L1, TRAF6, TICAM2, CSNK1G3, RAP1A, E…
GO:0048666_neuron_development	0.0345	-0.502	0.44	0.52	ENSECAG00000019993, ENSECAG00000007560, ENSECAG00000023274, ENSECAG00000006665, ENSECAG00000009111, ENSECAG00000011669, ENSECAG00000005815, ENSECAG00000010553, ENSECAG00000020281, ENSECAG00000003887, ENSECAG00000011938, ENSECAG00000017840, ENSECAG00000022329, ENSECAG00000009523, ENSECAG00000008730, ENSECAG00000022405, ENSECAG00000000558, ENSECAG00000000529, ENSECAG00000025119, ENSECAG00000015935,…	KALRN, FXR1, LAMA5, GPM6B, RUFY3, TNN, LLPH, NGF, PAK2, PBX2, MANF, PAK1, LRRC4C, ISL2, MAP4K4, NOTCH1, KIF5B, MAP1S, FRYL, ACTB, NEDD4L, DTNBP1, SMO, TIAM1, ACTB, VAPA, FMR1, UNK, ENAH, TAOK3, PPP1R9B, LHX8, GSK3B
GO:0048646_anatomical_structure_formation_involved_in_morphogenesis	-0.374	-0.383	0.536	0.528	ENSECAG00000007687, ENSECAG00000008709, ENSECAG00000010284, ENSECAG00000021186, ENSECAG00000015752, ENSECAG00000009958, ENSECAG00000007129, ENSECAG00000015606	PTPN14, LMOD3, PKNOX1, FHOD3, PDCL3, DUSP1, LRP6, CSRP2
GO:0008654_phospholipid_biosynthetic_process	-0.248	-0.303	0.528	0.528	ENSECAG00000019837, ENSECAG00000014481, ENSECAG00000015019, ENSECAG00000006875, ENSECAG00000021699, ENSECAG00000011752, ENSECAG00000033344, ENSECAG00000021665, ENSECAG00000011539	PIK3R1, AGPAT1, PIK3CA, IP6K2, SOCS7, ATG14, PIK3R3, SGMS2, CHKA
GO:0009165_nucleotide_biosynthetic_process	-0.436	-0.565	0.528	0.528	ENSECAG00000024684, ENSECAG00000029282, ENSECAG00000023644, ENSECAG00000007464, ENSECAG00000023269, ENSECAG00000021678, ENSECAG00000017534, ENSECAG00000012512, ENSECAG00000009708, ENSECAG00000018813, ENSECAG00000009780, ENSECAG00000011722, ENSECAG00000023847, ENSECAG00000025162, ENSECAG00000012484, ENSECAG00000023203, ENSECAG00000020948, ENSECAG00000028274, ENSECAG00000007968, ENSECAG00000021690	ATP5F1C, UQCRQ, PPAT, RRM2, GMPS, PAPSS1, HPRT1, COX6A1, UMPS, GUCY2C, UQCRB, COX4I1, RRM1, ATP5F1E, NAMPT, TYMS, PANK3, NDUFB6, COX5B, NDUFS6
GO:1901293_nucleoside_phosphate_biosynthetic_process	-0.436	-0.565	0.528	0.528	ENSECAG00000024684, ENSECAG00000029282, ENSECAG00000023644, ENSECAG00000007464, ENSECAG00000023269, ENSECAG00000021678, ENSECAG00000017534, ENSECAG00000012512, ENSECAG00000009708, ENSECAG00000018813, ENSECAG00000009780, ENSECAG00000011722, ENSECAG00000023847, ENSECAG00000025162, ENSECAG00000012484, ENSECAG00000023203, ENSECAG00000020948, ENSECAG00000028274, ENSECAG00000007968, ENSECAG00000021690	ATP5F1C, UQCRQ, PPAT, RRM2, GMPS, PAPSS1, HPRT1, COX6A1, UMPS, GUCY2C, UQCRB, COX4I1, RRM1, ATP5F1E, NAMPT, TYMS, PANK3, NDUFB6, COX5B, NDUFS6
GO:0051445_regulation_of_meiotic_cell_cycle	-0.349	-0.394	0.52	0.528	ENSECAG00000021504, ENSECAG00000011630, ENSECAG00000021800, ENSECAG00000003029, ENSECAG00000023776	SPATA22, FBXO5, WEE2, CDC25C, TTK
GO:0008380_RNA_splicing	0.0989	0.0989	0.512	0.528	ENSECAG00000008939, ENSECAG00000022024, ENSECAG00000012882, ENSECAG00000026981, ENSECAG00000009113, ENSECAG00000007560, ENSECAG00000019601, ENSECAG00000007824, ENSECAG00000012677, ENSECAG00000019989, ENSECAG00000010769, ENSECAG00000021380, ENSECAG00000022215, ENSECAG00000014258, ENSECAG00000007554, ENSECAG00000041724, ENSECAG00000007955, ENSECAG00000026848, ENSECAG00000010194, ENSECAG00000024151,…	RBM17, RBM8A, MATR3, SRRM1, PRPF40A, FXR1, DHX8, SNRPD2, HNRNPL, SNRPG, CWC22, RBMX, CRNKL1, PLRG1, GEMIN2, UBL5, HNRNPU, SNRPC, KHDRBS3, BUD31, CWC15, PRPF31, SLU7, SPEN, PRPF6, SCAF11, SRSF1, QKI, SF3A3, DDX46, RBFOX2, U2AF1, WTAP, SNRPB2, DNAJC17, SNRPN, SRSF6, KHDRBS1, CDC5L, MFAP1, CWF19L2, WBP4, SNRPE, SF3B2, DDX20, SNRPD3, RTRAF, SFSWAP, PRPF8, SMU1, SF3A1, SNRPD2, BUD13, CWC25, YTHDC1, CE…
GO:0043484_regulation_of_RNA_splicing	-0.00946	-0.314	0.504	0.528	ENSECAG00000012882, ENSECAG00000026981, ENSECAG00000007560, ENSECAG00000012677, ENSECAG00000021380, ENSECAG00000007955, ENSECAG00000010194, ENSECAG00000008833, ENSECAG00000017504, ENSECAG00000018923, ENSECAG00000003471, ENSECAG00000019346, ENSECAG00000023962, ENSECAG00000018303, ENSECAG00000006649, ENSECAG00000007741, ENSECAG00000032767, ENSECAG00000024737, ENSECAG00000021243, ENSECAG00000000784,…	MATR3, SRRM1, FXR1, HNRNPL, RBMX, HNRNPU, KHDRBS3, SPEN, QKI, RBFOX2, WTAP, KHDRBS1, SF3A1, YTHDC1, CELF2, CELF1, FMR1, SF3B4, PTBP3, ESRP1, NCL, ZNF638, RBM12
GO:0030705_cytoskeleton-dependent_intracellular_transport	-0.0387	-0.487	0.496	0.528	ENSECAG00000019646, ENSECAG00000015360, ENSECAG00000010951, ENSECAG00000015237, ENSECAG00000007560, ENSECAG00000023433, ENSECAG00000014600, ENSECAG00000008104, ENSECAG00000012044, ENSECAG00000020276, ENSECAG00000011655, ENSECAG00000022693, ENSECAG00000014459, ENSECAG00000007660, ENSECAG00000014240, ENSECAG00000022058, ENSECAG00000011438, ENSECAG00000020710, ENSECAG00000022600, ENSECAG00000024050,…	AHI1, IFT122, DNAAF4, PIBF1, FXR1, TMEM231, TRAK1, DYNLL1, PTPDC1, HOOK3, PCM1, SEPTIN7, ARL13B, DYNC1I2, IFT46, ODF2L, IFT57, DRC1, SPAG1, SCLT1, TRAF3IP1, CEP89, KIF5B, RHOT1, CEP20, CCDC88A, MYO5A, IQCB1, OFD1, SEPTIN2, DTNBP1, BBS5, CENPJ, ODF2, ARL8B, IFT74, BBS7, HYLS1, CEP41, LCA5, CCDC66, CCDC88C, MYO6, FMR1, CFAP20, IFT88, FBXW8, ENTR1
GO:0006974_cellular_response_to_DNA_damage_stimulus	-0.0459	-0.272	0.464	0.528	ENSECAG00000021147, ENSECAG00000011567, ENSECAG00000010827, ENSECAG00000015499, ENSECAG00000020524, ENSECAG00000023670, ENSECAG00000014072, ENSECAG00000007560, ENSECAG00000013845, ENSECAG00000023916, ENSECAG00000022979, ENSECAG00000018233, ENSECAG00000009962, ENSECAG00000008011, ENSECAG00000024392, ENSECAG00000020522, ENSECAG00000020269, ENSECAG00000000796, ENSECAG00000007804, ENSECAG00000022964,…	ATM, UIMC1, TEX15, XPC, MRNIP, CUL4B, PMS2, FXR1, HUS1, SPRTN, MPG, NIPBL, MSH3, MLH3, BRIP1, PRIMPOL, XRCC4, CETN2, REV1, CDC7, RBBP8, APEX2, PPP4R3B, PARG, FANCL, RAD21, MCM6, WDR76, MCM5, DEK, RNF168, RAD50, CGAS, WDR70, NEIL3, MCM2, RFC4, INIP, RHNO1, GTF2H5, GINS2, ZNF830, GTF2H1, TICRR, RAD52, MSH6, BLM, TIGAR, DCLRE1A, RAD18, MSH2, UBE2T, MNAT1, TDP1, GINS4, MUTYH, NUCKS1, FMR1, HPF1, NABP…
GO:0050793_regulation_of_developmental_process	0.0571	-0.464	0.44	0.528	ENSECAG00000013186, ENSECAG00000022262, ENSECAG00000018333, ENSECAG00000038178, ENSECAG00000007560, ENSECAG00000007187, ENSECAG00000009003, ENSECAG00000009111, ENSECAG00000014081, ENSECAG00000028820, ENSECAG00000012900, ENSECAG00000023111, ENSECAG00000011111, ENSECAG00000010553, ENSECAG00000020281, ENSECAG00000017840, ENSECAG00000010880, ENSECAG00000004389, ENSECAG00000022329, ENSECAG00000015006,…	WWC3, BRWD1, EZR, HEY2, FXR1, BRWD3, APC, RUFY3, WWC1, HEY1, MSN, CLSTN1, FMNL2, NGF, PAK2, PAK1, SOX6, MFF, LRRC4C, FGFR1, ZFHX3, NEDD4L, WWC2, ADD1, TIAM1, FMR1, VANGL1, RDX, RBPMS2, MTURN
GO:0006629_lipid_metabolic_process	-0.175	-0.17	0.56	0.536	ENSECAG00000019837, ENSECAG00000014481, ENSECAG00000015019, ENSECAG00000021725, ENSECAG00000006875, ENSECAG00000006280, ENSECAG00000024810, ENSECAG00000023693, ENSECAG00000010524, ENSECAG00000021699, ENSECAG00000023082, ENSECAG00000013749, ENSECAG00000011752, ENSECAG00000033344, ENSECAG00000020652, ENSECAG00000024941, ENSECAG00000021665, ENSECAG00000005838, ENSECAG00000012878, ENSECAG00000011658,…	PIK3R1, AGPAT1, PIK3CA, TFDP2, IP6K2, LPIN2, PLA2G4A, ECI1, DCAF5, SOCS7, HACD3, MBOAT1, ATG14, PIK3R3, ECHDC1, ALG6, SGMS2, MOGAT1, PNPLA8, FAM135A, ACSF3, CHKA, DEGS1, AUH, ACSL3, PTGES3, ABHD16A, LBR, PLA2G4A
GO:0098813_nuclear_chromosome_segregation	-0.0849	-0.18	0.544	0.536	ENSECAG00000016155, ENSECAG00000010827, ENSECAG00000016913, ENSECAG00000016925, ENSECAG00000012899, ENSECAG00000009163, ENSECAG00000016495, ENSECAG00000018233, ENSECAG00000017906, ENSECAG00000007955, ENSECAG00000015641, ENSECAG00000017824, ENSECAG00000023019, ENSECAG00000007006, ENSECAG00000014542, ENSECAG00000007470, ENSECAG00000019776, ENSECAG00000016392, ENSECAG00000021452, ENSECAG00000006712,…	KIF18A, TEX15, MEIKIN, WAPL, ESCO2, NUF2, NUSAP1, NIPBL, PRC1, HNRNPU, DSCC1, TERB1, KIF18B, ANAPC1, SPICE1, NCAPG, SMC1A, RAD21, BUB1B, WRAP73, CDCA8, SMC1B, ZWILCH, STAG1, CCNB1, NCAPD3, PHF13, BUB3, KNSTRN, NCAPH, ESPL1, CENPC, TTK, TOP2A, TUBG1, ESCO1, NCAPG2, BUB1, NDC80
GO:0018130_heterocycle_biosynthetic_process	-0.277	-0.775	0.528	0.536	ENSECAG00000024766, ENSECAG00000021000, ENSECAG00000013186, ENSECAG00000024130, ENSECAG00000022262, ENSECAG00000000648, ENSECAG00000014979, ENSECAG00000011749, ENSECAG00000011357, ENSECAG00000007240, ENSECAG00000024605, ENSECAG00000012780, ENSECAG00000022110, ENSECAG00000006101, ENSECAG00000005699, ENSECAG00000016520, ENSECAG00000018169, ENSECAG00000014283, ENSECAG00000017503, ENSECAG00000030438,…	CREBBP, PAX6, WWC3, ZNF609, BRWD1, LCORL, AFAP1L2, MSX2, GATAD2B, CYLD, SIN3A, CBX3, ASXL1, ZBTB39, SERTAD3, ZHX3, RREB1, NCOA7, BNC2, BRD4, ATF2, HMGB3, DRGX, HEY2, BRD7, CAMTA1, GTF2A2, EGR1, ZFHX4, AKAP13, CREB3L2, NUP35, ATP5F1C, SFPQ, HEATR1, SOHLH2, UQCRQ, CDK7, FOXO1, BRWD3, NOC3L, RIPK2, PCGF6, PHF1, TADA2A, NSD3, TET3, ELK3, LPIN2, ARID4A, TRPS1, WBP2, PPAT, TBP, MED13, SMAD6, HMX1, MTA3…
GO:0019438_aromatic_compound_biosynthetic_process	-0.277	-0.775	0.528	0.536	ENSECAG00000024766, ENSECAG00000021000, ENSECAG00000013186, ENSECAG00000024130, ENSECAG00000022262, ENSECAG00000000648, ENSECAG00000014979, ENSECAG00000011749, ENSECAG00000011357, ENSECAG00000007240, ENSECAG00000024605, ENSECAG00000012780, ENSECAG00000022110, ENSECAG00000006101, ENSECAG00000005699, ENSECAG00000016520, ENSECAG00000018169, ENSECAG00000014283, ENSECAG00000017503, ENSECAG00000030438,…	CREBBP, PAX6, WWC3, ZNF609, BRWD1, LCORL, AFAP1L2, MSX2, GATAD2B, CYLD, SIN3A, CBX3, ASXL1, ZBTB39, SERTAD3, ZHX3, RREB1, NCOA7, BNC2, BRD4, ATF2, HMGB3, DRGX, HEY2, BRD7, CAMTA1, GTF2A2, EGR1, ZFHX4, AKAP13, CREB3L2, NUP35, ATP5F1C, SFPQ, HEATR1, SOHLH2, UQCRQ, CDK7, FOXO1, BRWD3, NOC3L, RIPK2, PCGF6, PHF1, TADA2A, NSD3, TET3, ELK3, LPIN2, ARID4A, TRPS1, WBP2, PPAT, TBP, MED13, SMAD6, HMX1, MTA3…
GO:0006468_protein_phosphorylation	-0.229	-0.677	0.504	0.536	ENSECAG00000021289, ENSECAG00000020563, ENSECAG00000021147, ENSECAG00000012967, ENSECAG00000007008, ENSECAG00000023233, ENSECAG00000007560, ENSECAG00000031204, ENSECAG00000024916, ENSECAG00000014570, ENSECAG00000000138, ENSECAG00000021002, ENSECAG00000008264, ENSECAG00000017911, ENSECAG00000014371, ENSECAG00000016020, ENSECAG00000016023, ENSECAG00000004882, ENSECAG00000020015, ENSECAG00000008005,…	CCNE1, PIM1, ATM, PRKAA2, CDKL5, BMP15, FXR1, PIM3, PKN2, CDK7, ACVR2A, ROCK1, AKT1, PDCD10, CSNK1G2, CCNJ, CCNO, CSNK1A1, BMP6, AKT2, DYRK1A, CCNE2, SDCBP, CDC7, NGF, PAK2, PAK1, PRRC1, CCNF, CCNB3, VRK1, MAP4K4, CCNB2, CCNI, MKNK2, MOB1B, MKNK1, CDK2, TRIB2, GTF2H5, CSNK1G3, CCNH, GTF2H1, PDPK1, RACK1, FGF16, JAK1, CCNB1, CDK4, DTNBP1, CCNG2, CDC42BPA, MNAT1, GDF9, NDUFA9, PPIL4, CDK20, RPS6KA5…
GO:0033045_regulation_of_sister_chromatid_segregation	-0.565	-0.782	0.576	0.544	ENSECAG00000007955, ENSECAG00000007006, ENSECAG00000021452, ENSECAG00000018367, ENSECAG00000010047, ENSECAG00000023776, ENSECAG00000017103	HNRNPU, ANAPC1, BUB1B, ZWILCH, BUB3, TTK, BUB1
GO:0007033_vacuole_organization	-0.265	-0.314	0.552	0.544	ENSECAG00000020144, ENSECAG00000006545, ENSECAG00000013971, ENSECAG00000022114, ENSECAG00000012452, ENSECAG00000003759, ENSECAG00000011954, ENSECAG00000000965, ENSECAG00000022158, ENSECAG00000011752, ENSECAG00000016091, ENSECAG00000020653, ENSECAG00000012559	UBXN2A, NSFL1C, ATG5, WIPI2, ATG12, TBC1D14, ATG3, ATG2B, VPS4B, ATG14, ATG16L1, TMEM39A, RAB7A
GO:0010243_response_to_organonitrogen_compound	-0.316	-0.491	0.552	0.544	ENSECAG00000024205, ENSECAG00000019837, ENSECAG00000013569, ENSECAG00000012970, ENSECAG00000016551, ENSECAG00000006280, ENSECAG00000024243, ENSECAG00000016346, ENSECAG00000005729, ENSECAG00000010247, ENSECAG00000003079, ENSECAG00000033344, ENSECAG00000021821, ENSECAG00000030142, ENSECAG00000016434, ENSECAG00000026924, ENSECAG00000012386, ENSECAG00000022080, ENSECAG00000036783, ENSECAG00000007644,…	HSPA5, PIK3R1, LAMTOR3, FAF2, RAB13, LPIN2, GNAS, LEPROT, RRAGA, DERL2, CANX, PIK3R3, LAMTOR5, RNF175, RAP1A, JKAMP, SELENOS, LAMTOR1, SVIP, PKM, ERLEC1, UBE4A, LAMTOR4, CALR, GSK3B
GO:0017157_regulation_of_exocytosis	-0.552	-0.663	0.552	0.544	ENSECAG00000019725, ENSECAG00000024021, ENSECAG00000016551, ENSECAG00000017044, ENSECAG00000016434, ENSECAG00000017553, ENSECAG00000012588, ENSECAG00000008614	SYT11, CADPS2, RAB13, RALA, RAP1A, SEPTIN2, DTNBP1, LLGL2
GO:0006310_DNA_recombination	-0.373	-0.405	0.544	0.544	ENSECAG00000010827, ENSECAG00000013845, ENSECAG00000018233, ENSECAG00000009962, ENSECAG00000024392, ENSECAG00000022964, ENSECAG00000018454, ENSECAG00000016392, ENSECAG00000008840, ENSECAG00000032705, ENSECAG00000014368, ENSECAG00000010922, ENSECAG00000019809, ENSECAG00000020362, ENSECAG00000019631, ENSECAG00000003634, ENSECAG00000024215, ENSECAG00000018676, ENSECAG00000011405, ENSECAG00000010315,…	TEX15, HUS1, NIPBL, MSH3, BRIP1, CDC7, RBBP8, RAD21, MCM6, H1-3, MCM5, RAD50, CGAS, MND1, MCM2, RHNO1, GINS2, RAD52, BLM, MSH2, GINS4, NUCKS1, NABP1, TOP2A, PALB2, BRCA2, RAD51AP1, H1-4, REV3L
GO:0030001_metal_ion_transport	-0.423	-0.446	0.536	0.544	ENSECAG00000024970, ENSECAG00000021259, ENSECAG00000006518, ENSECAG00000012027, ENSECAG00000023360, ENSECAG00000020082, ENSECAG00000031669, ENSECAG00000040743, ENSECAG00000019132, ENSECAG00000041537, ENSECAG00000016301, ENSECAG00000024623, ENSECAG00000009911, ENSECAG00000010585, ENSECAG00000000751, ENSECAG00000007671, ENSECAG00000024593, ENSECAG00000016494, ENSECAG00000023501, ENSECAG00000009313,…	KCNQ1, SCNN1G, SLC39A10, CACNA1E, KCNK10, KCNN2, SLC48A1, SELENOK, SLMAP, FXYD6, MCUB, ATP1A1, SLC12A7, KCNK7, NEDD4L, ATP2A2, SLC35G1, MICU2, WNK1, KCNK1, SLC39A6, ATP1B1
GO:0009150_purine_ribonucleotide_metabolic_process	-0.292	-0.478	0.528	0.544	ENSECAG00000024684, ENSECAG00000029282, ENSECAG00000023269, ENSECAG00000021678, ENSECAG00000017534, ENSECAG00000012512, ENSECAG00000018813, ENSECAG00000019133, ENSECAG00000009780, ENSECAG00000011722, ENSECAG00000019319, ENSECAG00000007644, ENSECAG00000025162, ENSECAG00000020948, ENSECAG00000028274, ENSECAG00000007968, ENSECAG00000021690, ENSECAG00000019618, ENSECAG00000010765, ENSECAG00000011122,…	ATP5F1C, UQCRQ, GMPS, PAPSS1, HPRT1, COX6A1, GUCY2C, TIGAR, UQCRB, COX4I1, NUDT4, PKM, ATP5F1E, PANK3, NDUFB6, COX5B, NDUFS6, FAR1, ACSL3, SUCLA2, ACOT9
GO:0099536_synaptic_signaling	-0.359	-0.791	0.52	0.544	ENSECAG00000015766, ENSECAG00000013384, ENSECAG00000024272, ENSECAG00000007560, ENSECAG00000012027, ENSECAG00000024990, ENSECAG00000024834, ENSECAG00000024243, ENSECAG00000011582, ENSECAG00000023111, ENSECAG00000022329, ENSECAG00000026896, ENSECAG00000009911, ENSECAG00000016434, ENSECAG00000022427, ENSECAG00000012588, ENSECAG00000007129, ENSECAG00000032767, ENSECAG00000014615, ENSECAG00000015834,…	SNCA, STX3, RIMS1, FXR1, CACNA1E, SLC17A6, KCMF1, GNAS, DLGAP4, CLSTN1, LRRC4C, LYPD1, SLC12A7, RAP1A, UNC13C, DTNBP1, LRP6, FMR1, STX2, DMD, GRM8
GO:0006497_protein_lipidation	-0.545	-0.579	0.6	0.552	ENSECAG00000020655, ENSECAG00000013226, ENSECAG00000013971, ENSECAG00000022114, ENSECAG00000012452, ENSECAG00000011648, ENSECAG00000013216, ENSECAG00000016465	GOLGA7, ZDHHC6, ATG5, WIPI2, ATG12, ZDHHC5, NMT1, ZDHHC20
GO:0042158_lipoprotein_biosynthetic_process	-0.545	-0.579	0.6	0.552	ENSECAG00000020655, ENSECAG00000013226, ENSECAG00000013971, ENSECAG00000022114, ENSECAG00000012452, ENSECAG00000011648, ENSECAG00000013216, ENSECAG00000016465	GOLGA7, ZDHHC6, ATG5, WIPI2, ATG12, ZDHHC5, NMT1, ZDHHC20
GO:1903050_regulation_of_proteolysis_involved_in_cellular_protein_catabolic_process	-0.386	-0.532	0.592	0.552	ENSECAG00000014582, ENSECAG00000019466, ENSECAG00000010405, ENSECAG00000021240, ENSECAG00000036783, ENSECAG00000022109, ENSECAG00000019705	UFL1, ARIH1, TRIB2, SH3RF1, SVIP, NUB1, CDC20
GO:1903362_regulation_of_cellular_protein_catabolic_process	-0.386	-0.532	0.592	0.552	ENSECAG00000014582, ENSECAG00000019466, ENSECAG00000010405, ENSECAG00000021240, ENSECAG00000036783, ENSECAG00000022109, ENSECAG00000019705	UFL1, ARIH1, TRIB2, SH3RF1, SVIP, NUB1, CDC20
GO:2000058_regulation_of_ubiquitin-dependent_protein_catabolic_process	-0.386	-0.532	0.592	0.552	ENSECAG00000014582, ENSECAG00000019466, ENSECAG00000010405, ENSECAG00000021240, ENSECAG00000036783, ENSECAG00000022109, ENSECAG00000019705	UFL1, ARIH1, TRIB2, SH3RF1, SVIP, NUB1, CDC20
GO:0000727_double-strand_break_repair_via_break-induced_replication	-0.543	-0.548	0.576	0.552	ENSECAG00000022964, ENSECAG00000008840, ENSECAG00000014368, ENSECAG00000019631, ENSECAG00000024215, ENSECAG00000020517	CDC7, MCM6, MCM5, MCM2, GINS2, GINS4
GO:0003008_system_process	-0.202	-0.172	0.568	0.552	ENSECAG00000020528, ENSECAG00000024243, ENSECAG00000000487, ENSECAG00000011582, ENSECAG00000010553, ENSECAG00000014949, ENSECAG00000008709, ENSECAG00000010942, ENSECAG00000019104, ENSECAG00000022254, ENSECAG00000022254	TJP1, GNAS, SYNM, DLGAP4, NGF, TPM1, LMOD3, TPM3, REN, TPM4, TPM4
GO:0031589_cell-substrate_adhesion	-0.406	-0.358	0.552	0.552	ENSECAG00000017386, ENSECAG00000011669, ENSECAG00000008303, ENSECAG00000020305, ENSECAG00000022498, ENSECAG00000000480	ITGA1, TNN, LAMB1, FERMT2, ITGB1, ABI3BP
GO:0061564_axon_development	-0.16	-0.389	0.552	0.552	ENSECAG00000019993, ENSECAG00000023274, ENSECAG00000006665, ENSECAG00000009111, ENSECAG00000010553, ENSECAG00000020281, ENSECAG00000017840, ENSECAG00000022329, ENSECAG00000009523, ENSECAG00000022405, ENSECAG00000000558, ENSECAG00000000529, ENSECAG00000015935, ENSECAG00000004904, ENSECAG00000032992, ENSECAG00000015935, ENSECAG00000022447	KALRN, LAMA5, GPM6B, RUFY3, NGF, PAK2, PAK1, LRRC4C, ISL2, NOTCH1, KIF5B, MAP1S, ACTB, SMO, TIAM1, ACTB, ENAH
GO:0090150_establishment_of_protein_localization_to_membrane	-0.223	-0.296	0.544	0.552	ENSECAG00000013384, ENSECAG00000012391, ENSECAG00000020655, ENSECAG00000013226, ENSECAG00000017105, ENSECAG00000023865, ENSECAG00000006920, ENSECAG00000006321, ENSECAG00000021981, ENSECAG00000006392, ENSECAG00000013475, ENSECAG00000019987, ENSECAG00000019039, ENSECAG00000018378, ENSECAG00000008895, ENSECAG00000009566, ENSECAG00000016465	STX3, ROMO1, GOLGA7, ZDHHC6, SEC62, RAB11A, SRP72, GOLPH3, WDR83OS, SEC63, SEC61A1, GRIPAP1, CNST, TRAM1, SRP19, GOPC, ZDHHC20
GO:0051240_positive_regulation_of_multicellular_organismal_process	-0.215	-0.478	0.544	0.552	ENSECAG00000014979, ENSECAG00000023111, ENSECAG00000010553, ENSECAG00000010880, ENSECAG00000019809, ENSECAG00000014473, ENSECAG00000012844, ENSECAG00000032992	AFAP1L2, CLSTN1, NGF, SOX6, CGAS, SEC14L1, TICAM2, TIAM1
GO:1901698_response_to_nitrogen_compound	-0.352	-0.573	0.544	0.552	ENSECAG00000024205, ENSECAG00000019837, ENSECAG00000013569, ENSECAG00000012970, ENSECAG00000016551, ENSECAG00000006280, ENSECAG00000024243, ENSECAG00000016346, ENSECAG00000005729, ENSECAG00000010247, ENSECAG00000003079, ENSECAG00000033344, ENSECAG00000019809, ENSECAG00000026896, ENSECAG00000021821, ENSECAG00000030142, ENSECAG00000012844, ENSECAG00000016434, ENSECAG00000026924, ENSECAG00000012386,…	HSPA5, PIK3R1, LAMTOR3, FAF2, RAB13, LPIN2, GNAS, LEPROT, RRAGA, DERL2, CANX, PIK3R3, CGAS, LYPD1, LAMTOR5, RNF175, TICAM2, RAP1A, JKAMP, SELENOS, LAMTOR1, SVIP, PKM, ERLEC1, UBE4A, LAMTOR4, CALR, GSK3B
GO:0051091_positive_regulation_of_DNA-binding_transcription_factor_activity	-0.312	-0.573	0.536	0.552	ENSECAG00000009706, ENSECAG00000023011, ENSECAG00000008715, ENSECAG00000012960, ENSECAG00000016261, ENSECAG00000003277, ENSECAG00000021091, ENSECAG00000012844, ENSECAG00000006524, ENSECAG00000016918, ENSECAG00000007129, ENSECAG00000025005, ENSECAG00000009482, ENSECAG00000016986	AKAP13, RIPK2, TMEM9B, IRAK2, UACA, REL, TRAF6, TICAM2, FANK1, TMED4, LRP6, BCL10, PPRC1, PPM1B
GO:0098655_cation_transmembrane_transport	-0.487	-0.621	0.536	0.552	ENSECAG00000024970, ENSECAG00000024684, ENSECAG00000029282, ENSECAG00000021259, ENSECAG00000006518, ENSECAG00000012027, ENSECAG00000023360, ENSECAG00000020082, ENSECAG00000019132, ENSECAG00000041537, ENSECAG00000016301, ENSECAG00000024623, ENSECAG00000009911, ENSECAG00000010585, ENSECAG00000012512, ENSECAG00000000751, ENSECAG00000007671, ENSECAG00000009780, ENSECAG00000011722, ENSECAG00000024593,…	KCNQ1, ATP5F1C, UQCRQ, SCNN1G, SLC39A10, CACNA1E, KCNK10, KCNN2, SLMAP, FXYD6, MCUB, ATP1A1, SLC12A7, KCNK7, COX6A1, NEDD4L, ATP2A2, UQCRB, COX4I1, SLC35G1, MICU2, ATP5F1E, WNK1, NDUFB6, KCNK1, COX5B, NDUFS6, SLC39A6, ATP1B1
GO:0098662_inorganic_cation_transmembrane_transport	-0.487	-0.621	0.536	0.552	ENSECAG00000024970, ENSECAG00000024684, ENSECAG00000029282, ENSECAG00000021259, ENSECAG00000006518, ENSECAG00000012027, ENSECAG00000023360, ENSECAG00000020082, ENSECAG00000019132, ENSECAG00000041537, ENSECAG00000016301, ENSECAG00000024623, ENSECAG00000009911, ENSECAG00000010585, ENSECAG00000012512, ENSECAG00000000751, ENSECAG00000007671, ENSECAG00000009780, ENSECAG00000011722, ENSECAG00000024593,…	KCNQ1, ATP5F1C, UQCRQ, SCNN1G, SLC39A10, CACNA1E, KCNK10, KCNN2, SLMAP, FXYD6, MCUB, ATP1A1, SLC12A7, KCNK7, COX6A1, NEDD4L, ATP2A2, UQCRB, COX4I1, SLC35G1, MICU2, ATP5F1E, WNK1, NDUFB6, KCNK1, COX5B, NDUFS6, SLC39A6, ATP1B1
GO:0046578_regulation_of_Ras_protein_signal_transduction	-0.325	-0.328	0.6	0.56	ENSECAG00000017234, ENSECAG00000009706, ENSECAG00000012915, ENSECAG00000017689, ENSECAG00000014922, ENSECAG00000019560, ENSECAG00000021234	ARHGAP17, AKAP13, KCTD13, ARHGEF28, EPS8, KCTD10, NET1
GO:0010942_positive_regulation_of_cell_death	-0.501	-0.496	0.592	0.56	ENSECAG00000007240, ENSECAG00000017458, ENSECAG00000014198, ENSECAG00000000517, ENSECAG00000025005	CYLD, BNIP3, MTCH2, HTRA2, BCL10
GO:0043068_positive_regulation_of_programmed_cell_death	-0.501	-0.496	0.592	0.56	ENSECAG00000007240, ENSECAG00000017458, ENSECAG00000014198, ENSECAG00000000517, ENSECAG00000025005	CYLD, BNIP3, MTCH2, HTRA2, BCL10
GO:0018105_peptidyl-serine_phosphorylation	-0.621	-0.667	0.592	0.56	ENSECAG00000024916, ENSECAG00000008264, ENSECAG00000014371, ENSECAG00000004882, ENSECAG00000008005, ENSECAG00000024965, ENSECAG00000022964, ENSECAG00000010553, ENSECAG00000019890, ENSECAG00000025008, ENSECAG00000000735, ENSECAG00000019198, ENSECAG00000000626, ENSECAG00000016601, ENSECAG00000008744, ENSECAG00000023776, ENSECAG00000021408	PKN2, AKT1, CSNK1G2, CSNK1A1, AKT2, DYRK1A, CDC7, NGF, VRK1, MKNK2, MKNK1, CSNK1G3, PDPK1, NDUFA9, UHMK1, TTK, VRK2
GO:0055086_nucleobase-containing_small_molecule_metabolic_process	-0.586	-0.717	0.56	0.56	ENSECAG00000024684, ENSECAG00000029282, ENSECAG00000023644, ENSECAG00000007464, ENSECAG00000023269, ENSECAG00000022081, ENSECAG00000021678, ENSECAG00000017534, ENSECAG00000017251, ENSECAG00000012512, ENSECAG00000008959, ENSECAG00000009708, ENSECAG00000018813, ENSECAG00000015690, ENSECAG00000019133, ENSECAG00000009780, ENSECAG00000011722, ENSECAG00000023847, ENSECAG00000023658, ENSECAG00000019319,…	ATP5F1C, UQCRQ, PPAT, RRM2, GMPS, PARG, PAPSS1, HPRT1, PARK7, COX6A1, SAMHD1, UMPS, GUCY2C, SHMT1, TIGAR, UQCRB, COX4I1, RRM1, NUDT5, NUDT4, PKM, ATP5F1E, NAMPT, TYMS, PANK3, NDUFB6, COX5B, NDUFS6, FAR1, ACSL3, SUCLA2, ACOT9
GO:0009141_nucleoside_triphosphate_metabolic_process	-0.368	-0.547	0.544	0.56	ENSECAG00000024684, ENSECAG00000029282, ENSECAG00000012512, ENSECAG00000008959, ENSECAG00000009780, ENSECAG00000011722, ENSECAG00000025162, ENSECAG00000028274, ENSECAG00000007968, ENSECAG00000021690	ATP5F1C, UQCRQ, COX6A1, SAMHD1, UQCRB, COX4I1, ATP5F1E, NDUFB6, COX5B, NDUFS6
GO:0009144_purine_nucleoside_triphosphate_metabolic_process	-0.368	-0.547	0.544	0.56	ENSECAG00000024684, ENSECAG00000029282, ENSECAG00000012512, ENSECAG00000008959, ENSECAG00000009780, ENSECAG00000011722, ENSECAG00000025162, ENSECAG00000028274, ENSECAG00000007968, ENSECAG00000021690	ATP5F1C, UQCRQ, COX6A1, SAMHD1, UQCRB, COX4I1, ATP5F1E, NDUFB6, COX5B, NDUFS6
GO:0010970_transport_along_microtubule	-0.122	-0.608	0.52	0.56	ENSECAG00000019646, ENSECAG00000015360, ENSECAG00000010951, ENSECAG00000015237, ENSECAG00000007560, ENSECAG00000023433, ENSECAG00000014600, ENSECAG00000008104, ENSECAG00000012044, ENSECAG00000011655, ENSECAG00000022693, ENSECAG00000014459, ENSECAG00000007660, ENSECAG00000014240, ENSECAG00000022058, ENSECAG00000011438, ENSECAG00000020710, ENSECAG00000022600, ENSECAG00000024050, ENSECAG00000009886,…	AHI1, IFT122, DNAAF4, PIBF1, FXR1, TMEM231, TRAK1, DYNLL1, PTPDC1, PCM1, SEPTIN7, ARL13B, DYNC1I2, IFT46, ODF2L, IFT57, DRC1, SPAG1, SCLT1, TRAF3IP1, CEP89, KIF5B, RHOT1, CEP20, IQCB1, OFD1, SEPTIN2, DTNBP1, BBS5, CENPJ, ODF2, ARL8B, IFT74, BBS7, HYLS1, CEP41, LCA5, CCDC66, FMR1, CFAP20, IFT88, FBXW8, ENTR1
GO:0099111_microtubule-based_transport	-0.122	-0.608	0.52	0.56	ENSECAG00000019646, ENSECAG00000015360, ENSECAG00000010951, ENSECAG00000015237, ENSECAG00000007560, ENSECAG00000023433, ENSECAG00000014600, ENSECAG00000008104, ENSECAG00000012044, ENSECAG00000011655, ENSECAG00000022693, ENSECAG00000014459, ENSECAG00000007660, ENSECAG00000014240, ENSECAG00000022058, ENSECAG00000011438, ENSECAG00000020710, ENSECAG00000022600, ENSECAG00000024050, ENSECAG00000009886,…	AHI1, IFT122, DNAAF4, PIBF1, FXR1, TMEM231, TRAK1, DYNLL1, PTPDC1, PCM1, SEPTIN7, ARL13B, DYNC1I2, IFT46, ODF2L, IFT57, DRC1, SPAG1, SCLT1, TRAF3IP1, CEP89, KIF5B, RHOT1, CEP20, IQCB1, OFD1, SEPTIN2, DTNBP1, BBS5, CENPJ, ODF2, ARL8B, IFT74, BBS7, HYLS1, CEP41, LCA5, CCDC66, FMR1, CFAP20, IFT88, FBXW8, ENTR1
GO:0008088_axo-dendritic_transport	-0.0818	-0.784	0.472	0.56	ENSECAG00000007560, ENSECAG00000014600, ENSECAG00000000558, ENSECAG00000012588, ENSECAG00000013084, ENSECAG00000032767	FXR1, TRAK1, KIF5B, DTNBP1, ARL8B, FMR1
GO:0022403_cell_cycle_phase	-0.355	-0.424	0.576	0.568	ENSECAG00000010827, ENSECAG00000020524, ENSECAG00000016913, ENSECAG00000013845, ENSECAG00000024392, ENSECAG00000017824, ENSECAG00000016392, ENSECAG00000020362, ENSECAG00000021453, ENSECAG00000021800, ENSECAG00000032970, ENSECAG00000018267, ENSECAG00000013053	TEX15, MRNIP, MEIKIN, HUS1, BRIP1, TERB1, RAD21, MND1, TICRR, WEE2, BCL2L11, CENPC, TOP2A
GO:0044848_biological_phase	-0.355	-0.424	0.576	0.568	ENSECAG00000010827, ENSECAG00000020524, ENSECAG00000016913, ENSECAG00000013845, ENSECAG00000024392, ENSECAG00000017824, ENSECAG00000016392, ENSECAG00000020362, ENSECAG00000021453, ENSECAG00000021800, ENSECAG00000032970, ENSECAG00000018267, ENSECAG00000013053	TEX15, MRNIP, MEIKIN, HUS1, BRIP1, TERB1, RAD21, MND1, TICRR, WEE2, BCL2L11, CENPC, TOP2A
GO:0006164_purine_nucleotide_biosynthetic_process	-0.479	-0.645	0.568	0.568	ENSECAG00000024684, ENSECAG00000029282, ENSECAG00000023644, ENSECAG00000023269, ENSECAG00000021678, ENSECAG00000017534, ENSECAG00000012512, ENSECAG00000018813, ENSECAG00000009780, ENSECAG00000011722, ENSECAG00000025162, ENSECAG00000020948, ENSECAG00000028274, ENSECAG00000007968, ENSECAG00000021690	ATP5F1C, UQCRQ, PPAT, GMPS, PAPSS1, HPRT1, COX6A1, GUCY2C, UQCRB, COX4I1, ATP5F1E, PANK3, NDUFB6, COX5B, NDUFS6
GO:1901362_organic_cyclic_compound_biosynthetic_process	-0.286	-0.781	0.544	0.568	ENSECAG00000024766, ENSECAG00000021000, ENSECAG00000013186, ENSECAG00000024130, ENSECAG00000022262, ENSECAG00000000648, ENSECAG00000014979, ENSECAG00000011749, ENSECAG00000011357, ENSECAG00000007240, ENSECAG00000024605, ENSECAG00000012780, ENSECAG00000022110, ENSECAG00000006101, ENSECAG00000005699, ENSECAG00000016520, ENSECAG00000018169, ENSECAG00000014283, ENSECAG00000017503, ENSECAG00000030438,…	CREBBP, PAX6, WWC3, ZNF609, BRWD1, LCORL, AFAP1L2, MSX2, GATAD2B, CYLD, SIN3A, CBX3, ASXL1, ZBTB39, SERTAD3, ZHX3, RREB1, NCOA7, BNC2, BRD4, ATF2, HMGB3, DRGX, HEY2, BRD7, CAMTA1, GTF2A2, EGR1, ZFHX4, AKAP13, CREB3L2, NUP35, ATP5F1C, SFPQ, HEATR1, SOHLH2, UQCRQ, CDK7, FOXO1, BRWD3, NOC3L, RIPK2, PCGF6, PHF1, TADA2A, NSD3, TET3, ELK3, LPIN2, ARID4A, TRPS1, WBP2, PPAT, TBP, MED13, SMAD6, HMX1, MTA3…
GO:0051726_regulation_of_cell_cycle	-0.183	-0.402	0.592	0.576	ENSECAG00000021289, ENSECAG00000023961, ENSECAG00000021147, ENSECAG00000020286, ENSECAG00000014979, ENSECAG00000000354, ENSECAG00000020524, ENSECAG00000007240, ENSECAG00000016925, ENSECAG00000010056, ENSECAG00000031204, ENSECAG00000020071, ENSECAG00000014575, ENSECAG00000013845, ENSECAG00000018235, ENSECAG00000016020, ENSECAG00000021504, ENSECAG00000007955, ENSECAG00000016023, ENSECAG00000008466,…	CCNE1, AURKA, ATM, BIRC7, AFAP1L2, PLK2, MRNIP, CYLD, WAPL, C1H10orf90, PIM3, XIAP, RB1, HUS1, AVEN, CCNJ, SPATA22, HNRNPU, CCNO, BIRC5, CCSAP, ANAPC1, MAP9, SPICE1, CEP120, CCNE2, CDC6, WDR76, CCNF, BUB1B, CCNB3, CCNB2, NPM1, TBRG1, CCNI, RHNO1, CDK2, TIPIN, CDCA2, FBXO5, ZNF830, CCNH, ZWILCH, TICRR, SENP6, WEE2, CCNB1, GMNN, CDK4, PLK1, CCNG2, CDC25C, MNAT1, DBF4, MTBP, CSNK2A2, BIRC3, CKS1B, C…
GO:0038202_TORC1_signaling	-0.376	-0.445	0.584	0.576	ENSECAG00000021147, ENSECAG00000005374, ENSECAG00000015363, ENSECAG00000017195, ENSECAG00000021821	ATM, WAC, KLHL22, NPRL3, LAMTOR5
GO:1903432_regulation_of_TORC1_signaling	-0.376	-0.445	0.584	0.576	ENSECAG00000021147, ENSECAG00000005374, ENSECAG00000015363, ENSECAG00000017195, ENSECAG00000021821	ATM, WAC, KLHL22, NPRL3, LAMTOR5
GO:0016192_vesicle-mediated_transport	-0.447	-0.539	0.584	0.576	ENSECAG00000019646, ENSECAG00000005207, ENSECAG00000015766, ENSECAG00000022330, ENSECAG00000013384, ENSECAG00000015360, ENSECAG00000020824, ENSECAG00000036345, ENSECAG00000010951, ENSECAG00000010873, ENSECAG00000015237, ENSECAG00000015853, ENSECAG00000018333, ENSECAG00000024272, ENSECAG00000022787, ENSECAG00000020655, ENSECAG00000023433, ENSECAG00000019725, ENSECAG00000014600, ENSECAG00000024021,…	AHI1, RAB4A, SNCA, ERGIC2, STX3, IFT122, EPS15, SNX12, DNAAF4, CNIH4, PIBF1, SORT1, EZR, RIMS1, BCAP31, GOLGA7, TMEM231, SYT11, TRAK1, CADPS2, DYNLL1, RAB13, LMAN1, SNX3, VAMP7, SCFD1, PTPDC1, RAB11FIP1, CSNK1G2, SLC17A6, SAR1A, HSPA2, TMEM87A, ANXA11, ITSN1, CCDC91, PCM1, SEPTIN7, TRAPPC4, TRIP11, LEPROT, ARL13B, AP2B1, IFT46, TMED7, VPS45, RAB11A, RALA, MSN, RAB6A, ODF2L, IFT57, DRC1, REPS1, GO…
GO:0010638_positive_regulation_of_organelle_organization	-0.125	-0.209	0.576	0.576	ENSECAG00000012810, ENSECAG00000018435, ENSECAG00000000050, ENSECAG00000021916, ENSECAG00000009648, ENSECAG00000021545, ENSECAG00000022565, ENSECAG00000004389, ENSECAG00000010736, ENSECAG00000012734, ENSECAG00000023466, ENSECAG00000009651, ENSECAG00000010463, ENSECAG00000022222	TNKS2, WDR1, WASF3, CEP120, CLIP1, MTSS1, ATF7IP2, MFF, RESF1, BAIAP2L1, SLAIN2, TASOR, ENTR1, WASF1
GO:0007409_axonogenesis	-0.213	-0.453	0.576	0.576	ENSECAG00000019993, ENSECAG00000023274, ENSECAG00000009111, ENSECAG00000010553, ENSECAG00000020281, ENSECAG00000017840, ENSECAG00000022329, ENSECAG00000009523, ENSECAG00000022405, ENSECAG00000000558, ENSECAG00000000529, ENSECAG00000015935, ENSECAG00000004904, ENSECAG00000032992, ENSECAG00000015935, ENSECAG00000022447	KALRN, LAMA5, RUFY3, NGF, PAK2, PAK1, LRRC4C, ISL2, NOTCH1, KIF5B, MAP1S, ACTB, SMO, TIAM1, ACTB, ENAH
GO:0009117_nucleotide_metabolic_process	-0.491	-0.634	0.576	0.576	ENSECAG00000024684, ENSECAG00000029282, ENSECAG00000023644, ENSECAG00000007464, ENSECAG00000023269, ENSECAG00000021678, ENSECAG00000017534, ENSECAG00000017251, ENSECAG00000012512, ENSECAG00000008959, ENSECAG00000009708, ENSECAG00000018813, ENSECAG00000019133, ENSECAG00000009780, ENSECAG00000011722, ENSECAG00000023847, ENSECAG00000019319, ENSECAG00000007644, ENSECAG00000025162, ENSECAG00000012484,…	ATP5F1C, UQCRQ, PPAT, RRM2, GMPS, PAPSS1, HPRT1, PARK7, COX6A1, SAMHD1, UMPS, GUCY2C, TIGAR, UQCRB, COX4I1, RRM1, NUDT4, PKM, ATP5F1E, NAMPT, TYMS, PANK3, NDUFB6, COX5B, NDUFS6, FAR1, ACSL3, SUCLA2, ACOT9
GO:0009260_ribonucleotide_biosynthetic_process	-0.544	-0.71	0.568	0.576	ENSECAG00000024684, ENSECAG00000029282, ENSECAG00000023269, ENSECAG00000021678, ENSECAG00000017534, ENSECAG00000012512, ENSECAG00000009708, ENSECAG00000018813, ENSECAG00000009780, ENSECAG00000011722, ENSECAG00000025162, ENSECAG00000020948, ENSECAG00000028274, ENSECAG00000007968, ENSECAG00000021690	ATP5F1C, UQCRQ, GMPS, PAPSS1, HPRT1, COX6A1, UMPS, GUCY2C, UQCRB, COX4I1, ATP5F1E, PANK3, NDUFB6, COX5B, NDUFS6
GO:0046390_ribose_phosphate_biosynthetic_process	-0.544	-0.71	0.568	0.576	ENSECAG00000024684, ENSECAG00000029282, ENSECAG00000023269, ENSECAG00000021678, ENSECAG00000017534, ENSECAG00000012512, ENSECAG00000009708, ENSECAG00000018813, ENSECAG00000009780, ENSECAG00000011722, ENSECAG00000025162, ENSECAG00000020948, ENSECAG00000028274, ENSECAG00000007968, ENSECAG00000021690	ATP5F1C, UQCRQ, GMPS, PAPSS1, HPRT1, COX6A1, UMPS, GUCY2C, UQCRB, COX4I1, ATP5F1E, PANK3, NDUFB6, COX5B, NDUFS6
GO:2001022_positive_regulation_of_response_to_DNA_damage_stimulus	0.147	-0.699	0.368	0.576	ENSECAG00000011567, ENSECAG00000007560, ENSECAG00000019133, ENSECAG00000032767, ENSECAG00000008636	UIMC1, FXR1, TIGAR, FMR1, EYA1
GO:0006811_ion_transport	-0.812	-0.872	0.608	0.584	ENSECAG00000024970, ENSECAG00000014112, ENSECAG00000013398, ENSECAG00000024684, ENSECAG00000019725, ENSECAG00000021627, ENSECAG00000029282, ENSECAG00000021259, ENSECAG00000006518, ENSECAG00000012027, ENSECAG00000023360, ENSECAG00000020082, ENSECAG00000031669, ENSECAG00000024990, ENSECAG00000000767, ENSECAG00000040743, ENSECAG00000019132, ENSECAG00000041537, ENSECAG00000013480, ENSECAG00000022060,…	KCNQ1, SLC20A1, SLCO3A1, ATP5F1C, SYT11, SLC16A1, UQCRQ, SCNN1G, SLC39A10, CACNA1E, KCNK10, KCNN2, SLC48A1, SLC17A6, SLC4A7, SELENOK, SLMAP, FXYD6, ANO4, SLC25A32, MCUB, SLC25A13, ATP1A1, SLC12A7, SLC25A5, KCNK7, COX6A1, NEDD4L, ATP2A2, UQCRB, COX4I1, SLC35G1, SLCO4C1, MICU2, SLC25A22, ATP5F1E, XPR1, WNK1, NDUFB6, KCNK1, COX5B, NDUFS6, SLC39A6, SLC15A4, ATP1B1
GO:0000209_protein_polyubiquitination	-0.296	-0.372	0.6	0.584	ENSECAG00000000162, ENSECAG00000021385, ENSECAG00000019466, ENSECAG00000007006, ENSECAG00000032782, ENSECAG00000007233, ENSECAG00000026960, ENSECAG00000022379, ENSECAG00000011371, ENSECAG00000014586, ENSECAG00000021091, ENSECAG00000023505, ENSECAG00000015773, ENSECAG00000004655, ENSECAG00000020381, ENSECAG00000009617, ENSECAG00000020448, ENSECAG00000015502, ENSECAG00000011764, ENSECAG00000016647,…	TRIP12, HUWE1, ARIH1, ANAPC1, UBE2D1, UBE2E3, UBE2S, RNF34, UBE2E1, UBE2K, TRAF6, HECTD1, AMFR, TOPORS, AKTIP, UBE2Q2, UBE2T, RFFL, UBE4A, UBE2Q1, CDC26, RNF114, ITCH, OTUB1, UBE2N, FBXO38, TRIM2
GO:0006935_chemotaxis	-0.568	-0.595	0.6	0.584	ENSECAG00000019993, ENSECAG00000013300, ENSECAG00000023274, ENSECAG00000022405, ENSECAG00000000558, ENSECAG00000031442, ENSECAG00000004904, ENSECAG00000022447, ENSECAG00000002018	KALRN, CXCL10, LAMA5, NOTCH1, KIF5B, FGF16, SMO, ENAH, MACO1
GO:0042330_taxis	-0.568	-0.595	0.6	0.584	ENSECAG00000019993, ENSECAG00000013300, ENSECAG00000023274, ENSECAG00000022405, ENSECAG00000000558, ENSECAG00000031442, ENSECAG00000004904, ENSECAG00000022447, ENSECAG00000002018	KALRN, CXCL10, LAMA5, NOTCH1, KIF5B, FGF16, SMO, ENAH, MACO1
GO:0016567_protein_ubiquitination	-0.483	-0.568	0.592	0.584	ENSECAG00000020286, ENSECAG00000028965, ENSECAG00000023670, ENSECAG00000000162, ENSECAG00000035031, ENSECAG00000005374, ENSECAG00000020071, ENSECAG00000018149, ENSECAG00000017183, ENSECAG00000015363, ENSECAG00000021385, ENSECAG00000019655, ENSECAG00000009988, ENSECAG00000008466, ENSECAG00000012915, ENSECAG00000023177, ENSECAG00000019466, ENSECAG00000007006, ENSECAG00000010991, ENSECAG00000032782,…	BIRC7, NEDD8, CUL4B, TRIP12, UBB, WAC, XIAP, RNF20, PCGF6, KLHL22, HUWE1, SVBP, FBXO11, BIRC5, KCTD13, TBC1D22B, ARIH1, ANAPC1, CBLL1, UBE2D1, UBE2E3, DTX2, FANCL, FBXO32, UBE2S, RNF34, UBE2E1, UBE2K, WDR70, UHRF1, TRAF6, CNOT4, CUL1, UBB, HECTD1, PCGF1, RPS27A, AMFR, KCTD10, TOPORS, SH3RF1, AKTIP, UBE2Q2, RAD18, UBE2T, FBXO25, RFFL, BIRC3, UBE4A, UBE2Q1, DCUN1D1, PCGF2, CDC26, ZNF598, PCNP, RNF1…
GO:0000045_autophagosome_assembly	-0.386	-0.456	0.584	0.584	ENSECAG00000020144, ENSECAG00000006545, ENSECAG00000013971, ENSECAG00000022114, ENSECAG00000012452, ENSECAG00000003759, ENSECAG00000011954, ENSECAG00000000965, ENSECAG00000011752, ENSECAG00000016091, ENSECAG00000020653	UBXN2A, NSFL1C, ATG5, WIPI2, ATG12, TBC1D14, ATG3, ATG2B, ATG14, ATG16L1, TMEM39A
GO:0016236_macroautophagy	-0.386	-0.456	0.584	0.584	ENSECAG00000020144, ENSECAG00000006545, ENSECAG00000013971, ENSECAG00000022114, ENSECAG00000012452, ENSECAG00000003759, ENSECAG00000011954, ENSECAG00000000965, ENSECAG00000011752, ENSECAG00000016091, ENSECAG00000020653	UBXN2A, NSFL1C, ATG5, WIPI2, ATG12, TBC1D14, ATG3, ATG2B, ATG14, ATG16L1, TMEM39A
GO:1905037_autophagosome_organization	-0.386	-0.456	0.584	0.584	ENSECAG00000020144, ENSECAG00000006545, ENSECAG00000013971, ENSECAG00000022114, ENSECAG00000012452, ENSECAG00000003759, ENSECAG00000011954, ENSECAG00000000965, ENSECAG00000011752, ENSECAG00000016091, ENSECAG00000020653	UBXN2A, NSFL1C, ATG5, WIPI2, ATG12, TBC1D14, ATG3, ATG2B, ATG14, ATG16L1, TMEM39A
GO:0044281_small_molecule_metabolic_process	-0.479	-0.524	0.584	0.584	ENSECAG00000013424, ENSECAG00000000279, ENSECAG00000014964, ENSECAG00000024684, ENSECAG00000029282, ENSECAG00000021725, ENSECAG00000006875, ENSECAG00000011118, ENSECAG00000006280, ENSECAG00000023644, ENSECAG00000016016, ENSECAG00000023693, ENSECAG00000010524, ENSECAG00000020854, ENSECAG00000007464, ENSECAG00000010849, ENSECAG00000020890, ENSECAG00000023082, ENSECAG00000023269, ENSECAG00000022081,…	KARS1, FARS2, MRPL39, ATP5F1C, UQCRQ, TFDP2, IP6K2, GATC, LPIN2, PPAT, GNPDA2, ECI1, DCAF5, TARS1, RRM2, MDH1, PM20D2, HACD3, GMPS, PARG, RPIA, PAPSS1, ADH5, HPRT1, PARK7, ADH5, ECHDC1, COX6A1, SAMHD1, UMPS, GUCY2C, INPP1, SHMT1, SLC7A7, TIGAR, UQCRB, COX4I1, RRM1, NUDT5, GLUL, LARS1, PNPLA8, POLG2, MTHFD2, NUDT4, PKM, PSPH, ATP5F1E, FARSB, ACSF3, NAMPT, TYMS, AUH, PANK3, NDUFB6, IARS2, COX5B, ND…
GO:0032868_response_to_insulin	-0.312	-0.486	0.576	0.584	ENSECAG00000019837, ENSECAG00000016551, ENSECAG00000006280, ENSECAG00000033344, ENSECAG00000007644, ENSECAG00000024935	PIK3R1, RAB13, LPIN2, PIK3R3, PKM, GSK3B
GO:0032869_cellular_response_to_insulin_stimulus	-0.312	-0.486	0.576	0.584	ENSECAG00000019837, ENSECAG00000016551, ENSECAG00000006280, ENSECAG00000033344, ENSECAG00000007644, ENSECAG00000024935	PIK3R1, RAB13, LPIN2, PIK3R3, PKM, GSK3B
GO:0010608_post-transcriptional_regulation_of_gene_expression	-0.342	-0.951	0.552	0.584	ENSECAG00000005798, ENSECAG00000001582, ENSECAG00000011063, ENSECAG00000007560, ENSECAG00000019475, ENSECAG00000025040, ENSECAG00000007955, ENSECAG00000023108, ENSECAG00000003869, ENSECAG00000024732, ENSECAG00000015551, ENSECAG00000010723, ENSECAG00000023181, ENSECAG00000012606, ENSECAG00000009512, ENSECAG00000016873, ENSECAG00000012292, ENSECAG00000017141, ENSECAG00000012464, ENSECAG00000012956,…	CNOT7, CNOT6L, MOV10L1, FXR1, YTHDF1, ZCCHC17, HNRNPU, YTHDF2, ZC3H7A, EXOSC9, SAMD4B, ANGEL2, CNOT3, EXOSC8, CNBP, CPEB1, SRRT, UPF3A, SYNCRIP, DCPS, TNRC6B, HELZ, SSB, LARP1, UHMK1, RPS9, PAIP1, FMR1, FASTKD2, LARP1B, SECISBP2L, UPF3B, CPEB4, TRIM2
GO:0031399_regulation_of_protein_modification_process	-0.274	-0.778	0.536	0.584	ENSECAG00000021289, ENSECAG00000020286, ENSECAG00000023233, ENSECAG00000007560, ENSECAG00000020071, ENSECAG00000025118, ENSECAG00000017911, ENSECAG00000016020, ENSECAG00000019655, ENSECAG00000016023, ENSECAG00000008466, ENSECAG00000020015, ENSECAG00000020270, ENSECAG00000015053, ENSECAG00000015322, ENSECAG00000010553, ENSECAG00000022081, ENSECAG00000010969, ENSECAG00000024659, ENSECAG00000019369,…	CCNE1, BIRC7, BMP15, FXR1, XIAP, TADA2A, PDCD10, CCNJ, SVBP, CCNO, BIRC5, BMP6, CCNE2, SDCBP, PPP6R3, NGF, PARG, CTR9, PRRC1, CCNF, CCNB3, CCNB2, CCNI, WDR70, MOB1B, TRIB2, CCNH, RACK1, FGF16, CCNB1, CSNK2B, DTNBP1, CCNG2, MNAT1, GDF9, ENSA, PPIL4, BIRC3, DCUN1D1, SH3BP5, FMR1, HPF1, PPP1R12A, OTUB1, PMEPA1, CBLB
GO:0032880_regulation_of_protein_localization	-0.251	-0.382	0.616	0.592	ENSECAG00000016925, ENSECAG00000018333, ENSECAG00000023433, ENSECAG00000009730, ENSECAG00000012900, ENSECAG00000036783, ENSECAG00000019987, ENSECAG00000019039, ENSECAG00000008744, ENSECAG00000009566, ENSECAG00000002920, ENSECAG00000010463, ENSECAG00000008614	WAPL, EZR, TMEM231, SAR1A, MSN, SVIP, GRIPAP1, CNST, UHMK1, GOPC, RDX, ENTR1, LLGL2
GO:0015711_organic_anion_transport	-0.634	-0.571	0.616	0.592	ENSECAG00000013398, ENSECAG00000021627, ENSECAG00000000767, ENSECAG00000022060, ENSECAG00000013738, ENSECAG00000028359, ENSECAG00000009100, ENSECAG00000011808, ENSECAG00000009611	SLCO3A1, SLC16A1, SLC4A7, SLC25A32, SLC25A13, SLC25A5, SLCO4C1, SLC25A22, SLC15A4
GO:0097191_extrinsic_apoptotic_signaling_pathway	-0.231	-0.467	0.6	0.592	ENSECAG00000007240, ENSECAG00000006638, ENSECAG00000022379, ENSECAG00000015502, ENSECAG00000025005, ENSECAG00000007350, ENSECAG00000008636, ENSECAG00000024935	CYLD, CASP8AP2, RNF34, RFFL, BCL10, SIVA1, EYA1, GSK3B
GO:0032940_secretion_by_cell	-0.382	-0.48	0.6	0.592	ENSECAG00000013384, ENSECAG00000008013, ENSECAG00000024272, ENSECAG00000019725, ENSECAG00000024021, ENSECAG00000016551, ENSECAG00000014117, ENSECAG00000016134, ENSECAG00000019655, ENSECAG00000023865, ENSECAG00000017044, ENSECAG00000019791, ENSECAG00000016434, ENSECAG00000022427, ENSECAG00000017553, ENSECAG00000012588, ENSECAG00000008168, ENSECAG00000010149, ENSECAG00000021652, ENSECAG00000014615,…	STX3, NMB, RIMS1, SYT11, CADPS2, RAB13, VAMP7, RAB11FIP1, SVBP, RAB11A, RALA, RAB11FIP2, RAP1A, UNC13C, SEPTIN2, DTNBP1, EXOC5, EXOC3, RAB3IP, STX2, LLGL2
GO:0046903_secretion	-0.382	-0.48	0.6	0.592	ENSECAG00000013384, ENSECAG00000008013, ENSECAG00000024272, ENSECAG00000019725, ENSECAG00000024021, ENSECAG00000016551, ENSECAG00000014117, ENSECAG00000016134, ENSECAG00000019655, ENSECAG00000023865, ENSECAG00000017044, ENSECAG00000019791, ENSECAG00000016434, ENSECAG00000022427, ENSECAG00000017553, ENSECAG00000012588, ENSECAG00000008168, ENSECAG00000010149, ENSECAG00000021652, ENSECAG00000014615,…	STX3, NMB, RIMS1, SYT11, CADPS2, RAB13, VAMP7, RAB11FIP1, SVBP, RAB11A, RALA, RAB11FIP2, RAP1A, UNC13C, SEPTIN2, DTNBP1, EXOC5, EXOC3, RAB3IP, STX2, LLGL2
GO:0000281_mitotic_cytokinesis	-0.305	-0.314	0.632	0.6	ENSECAG00000021002, ENSECAG00000016495, ENSECAG00000006869, ENSECAG00000014059, ENSECAG00000008434	ROCK1, NUSAP1, MAP9, ECT2, EFHC1
GO:0006626_protein_targeting_to_mitochondrion	-0.488	-0.55	0.616	0.6	ENSECAG00000012391, ENSECAG00000019640, ENSECAG00000011409, ENSECAG00000009669, ENSECAG00000022600, ENSECAG00000004389, ENSECAG00000014253	ROMO1, TOMM20, TIMM44, GRPEL1, SPAG1, MFF, PMPCB
GO:0070585_protein_localization_to_mitochondrion	-0.488	-0.55	0.616	0.6	ENSECAG00000012391, ENSECAG00000019640, ENSECAG00000011409, ENSECAG00000009669, ENSECAG00000022600, ENSECAG00000004389, ENSECAG00000014253	ROMO1, TOMM20, TIMM44, GRPEL1, SPAG1, MFF, PMPCB
GO:0072655_establishment_of_protein_localization_to_mitochondrion	-0.488	-0.55	0.616	0.6	ENSECAG00000012391, ENSECAG00000019640, ENSECAG00000011409, ENSECAG00000009669, ENSECAG00000022600, ENSECAG00000004389, ENSECAG00000014253	ROMO1, TOMM20, TIMM44, GRPEL1, SPAG1, MFF, PMPCB
GO:0006812_cation_transport	-0.589	-0.713	0.608	0.6	ENSECAG00000024970, ENSECAG00000024684, ENSECAG00000019725, ENSECAG00000029282, ENSECAG00000021259, ENSECAG00000006518, ENSECAG00000012027, ENSECAG00000023360, ENSECAG00000020082, ENSECAG00000031669, ENSECAG00000040743, ENSECAG00000019132, ENSECAG00000041537, ENSECAG00000016301, ENSECAG00000024623, ENSECAG00000009911, ENSECAG00000010585, ENSECAG00000012512, ENSECAG00000000751, ENSECAG00000007671,…	KCNQ1, ATP5F1C, SYT11, UQCRQ, SCNN1G, SLC39A10, CACNA1E, KCNK10, KCNN2, SLC48A1, SELENOK, SLMAP, FXYD6, MCUB, ATP1A1, SLC12A7, KCNK7, COX6A1, NEDD4L, ATP2A2, UQCRB, COX4I1, SLC35G1, MICU2, ATP5F1E, WNK1, NDUFB6, KCNK1, COX5B, NDUFS6, SLC39A6, ATP1B1
GO:0007179_transforming_growth_factor_beta_receptor_signaling_pathway	-0.676	-0.846	0.6	0.6	ENSECAG00000013706, ENSECAG00000024602, ENSECAG00000015053, ENSECAG00000022649, ENSECAG00000015132, ENSECAG00000020259, ENSECAG00000018506, ENSECAG00000018005	SMAD6, RNF111, SDCBP, SMAD1, SMAD2, SMAD3, SMAD5, PMEPA1
GO:0071559_response_to_transforming_growth_factor_beta	-0.676	-0.846	0.6	0.6	ENSECAG00000013706, ENSECAG00000024602, ENSECAG00000015053, ENSECAG00000022649, ENSECAG00000015132, ENSECAG00000020259, ENSECAG00000018506, ENSECAG00000018005	SMAD6, RNF111, SDCBP, SMAD1, SMAD2, SMAD3, SMAD5, PMEPA1
GO:0071560_cellular_response_to_transforming_growth_factor_beta_stimulus	-0.676	-0.846	0.6	0.6	ENSECAG00000013706, ENSECAG00000024602, ENSECAG00000015053, ENSECAG00000022649, ENSECAG00000015132, ENSECAG00000020259, ENSECAG00000018506, ENSECAG00000018005	SMAD6, RNF111, SDCBP, SMAD1, SMAD2, SMAD3, SMAD5, PMEPA1
GO:0031503_protein-containing_complex_localization	-0.212	-0.466	0.584	0.6	ENSECAG00000019646, ENSECAG00000024920, ENSECAG00000013384, ENSECAG00000015360, ENSECAG00000010951, ENSECAG00000015237, ENSECAG00000023433, ENSECAG00000008104, ENSECAG00000012044, ENSECAG00000011655, ENSECAG00000022693, ENSECAG00000007602, ENSECAG00000014459, ENSECAG00000014240, ENSECAG00000023865, ENSECAG00000010701, ENSECAG00000022058, ENSECAG00000011438, ENSECAG00000020710, ENSECAG00000012800,…	AHI1, XPO1, STX3, IFT122, DNAAF4, PIBF1, TMEM231, DYNLL1, PTPDC1, PCM1, SEPTIN7, LTV1, ARL13B, IFT46, RAB11A, EIF6, ODF2L, IFT57, DRC1, NUP88, SPAG1, SCLT1, RAN, NPM1, TRAF3IP1, CEP89, RRS1, KIF5B, CEP20, IQCB1, OFD1, SEPTIN2, BBS5, CENPJ, ODF2, EXOC3, IFT74, BBS7, GRIPAP1, HYLS1, CEP41, LCA5, CCDC66, CFAP20, IFT88, SDAD1, FBXW8, ENTR1
GO:0072522_purine-containing_compound_biosynthetic_process	-0.71	-0.871	0.584	0.6	ENSECAG00000024684, ENSECAG00000029282, ENSECAG00000023644, ENSECAG00000023269, ENSECAG00000021678, ENSECAG00000017534, ENSECAG00000012512, ENSECAG00000018813, ENSECAG00000015690, ENSECAG00000009780, ENSECAG00000011722, ENSECAG00000025162, ENSECAG00000020948, ENSECAG00000028274, ENSECAG00000007968, ENSECAG00000021690	ATP5F1C, UQCRQ, PPAT, GMPS, PAPSS1, HPRT1, COX6A1, GUCY2C, SHMT1, UQCRB, COX4I1, ATP5F1E, PANK3, NDUFB6, COX5B, NDUFS6
GO:0016310_phosphorylation	-0.192	-0.676	0.544	0.6	ENSECAG00000021289, ENSECAG00000020563, ENSECAG00000021147, ENSECAG00000012967, ENSECAG00000007008, ENSECAG00000023233, ENSECAG00000017056, ENSECAG00000019837, ENSECAG00000007560, ENSECAG00000031204, ENSECAG00000024916, ENSECAG00000014570, ENSECAG00000000138, ENSECAG00000021002, ENSECAG00000008264, ENSECAG00000017911, ENSECAG00000014371, ENSECAG00000016020, ENSECAG00000021238, ENSECAG00000016023,…	CCNE1, PIM1, ATM, PRKAA2, CDKL5, BMP15, BTBD10, PIK3R1, FXR1, PIM3, PKN2, CDK7, ACVR2A, ROCK1, AKT1, PDCD10, CSNK1G2, CCNJ, IGF1R, CCNO, CSNK1A1, BMP6, AKT2, DYRK1A, CCNE2, SDCBP, CDC7, NGF, PAK2, PAK1, PRRC1, CCNF, ATG14, PIK3R3, CCNB3, VRK1, MAP4K4, CCNB2, CCNI, MKNK2, FGFR1, MOB1B, MKNK1, CDK2, TRIB2, GTF2H5, CSNK1G3, CCNH, GTF2H1, PDPK1, RACK1, FGF16, JAK1, TIGAR, CCNB1, CDK4, DTNBP1, CCNG2, …
GO:0000380_alternative_mRNA_splicing,_via_spliceosome	-0.356	-0.83	0.536	0.6	ENSECAG00000007560, ENSECAG00000007955, ENSECAG00000010194, ENSECAG00000008833, ENSECAG00000018923, ENSECAG00000003471, ENSECAG00000023932, ENSECAG00000019346, ENSECAG00000023962, ENSECAG00000006649, ENSECAG00000007741, ENSECAG00000032767, ENSECAG00000032191	FXR1, HNRNPU, KHDRBS3, SPEN, RBFOX2, WTAP, SRSF6, KHDRBS1, SF3A1, CELF2, CELF1, FMR1, RSRC1
GO:0060548_negative_regulation_of_cell_death	-0.571	-0.746	0.616	0.608	ENSECAG00000008992, ENSECAG00000020286, ENSECAG00000019545, ENSECAG00000031204, ENSECAG00000020071, ENSECAG00000008466, ENSECAG00000043283, ENSECAG00000010553, ENSECAG00000022379, ENSECAG00000042372, ENSECAG00000011461, ENSECAG00000019133, ENSECAG00000021240, ENSECAG00000005267, ENSECAG00000015502, ENSECAG00000012229, ENSECAG00000018209, ENSECAG00000008636	HYPK, BIRC7, BIRC6, PIM3, XIAP, BIRC5, AGR2, NGF, RNF34, PTMS, ARMC10, TIGAR, SH3RF1, BAG3, RFFL, BIRC3, CAAP1, EYA1
GO:0000375_RNA_splicing,_via_transesterification_reactions	-0.0932	-0.148	0.608	0.608	ENSECAG00000008939, ENSECAG00000026981, ENSECAG00000009113, ENSECAG00000007560, ENSECAG00000019601, ENSECAG00000007824, ENSECAG00000019989, ENSECAG00000010769, ENSECAG00000021380, ENSECAG00000022215, ENSECAG00000014258, ENSECAG00000007554, ENSECAG00000041724, ENSECAG00000007955, ENSECAG00000026848, ENSECAG00000010194, ENSECAG00000024151, ENSECAG00000013314, ENSECAG00000020667, ENSECAG00000008833,…	RBM17, SRRM1, PRPF40A, FXR1, DHX8, SNRPD2, SNRPG, CWC22, RBMX, CRNKL1, PLRG1, GEMIN2, UBL5, HNRNPU, SNRPC, KHDRBS3, BUD31, CWC15, PRPF31, SPEN, PRPF6, SCAF11, SRSF1, QKI, SF3A3, DDX46, RBFOX2, U2AF1, WTAP, SNRPB2, DNAJC17, SNRPN, SRSF6, KHDRBS1, CDC5L, MFAP1, CWF19L2, SNRPE, SF3B2, DDX20, SNRPD3, SFSWAP, PRPF8, SF3A1, SNRPD2, BUD13, CWC25, YTHDC1, CELF2, RBM5, DDX23, CELF1, FMR1, SRPK1, SRPK2, SF…
GO:0000377_RNA_splicing,_via_transesterification_reactions_with_bulged_adenosine_as_nucleophile	-0.0932	-0.148	0.608	0.608	ENSECAG00000008939, ENSECAG00000026981, ENSECAG00000009113, ENSECAG00000007560, ENSECAG00000019601, ENSECAG00000007824, ENSECAG00000019989, ENSECAG00000010769, ENSECAG00000021380, ENSECAG00000022215, ENSECAG00000014258, ENSECAG00000007554, ENSECAG00000041724, ENSECAG00000007955, ENSECAG00000026848, ENSECAG00000010194, ENSECAG00000024151, ENSECAG00000013314, ENSECAG00000020667, ENSECAG00000008833,…	RBM17, SRRM1, PRPF40A, FXR1, DHX8, SNRPD2, SNRPG, CWC22, RBMX, CRNKL1, PLRG1, GEMIN2, UBL5, HNRNPU, SNRPC, KHDRBS3, BUD31, CWC15, PRPF31, SPEN, PRPF6, SCAF11, SRSF1, QKI, SF3A3, DDX46, RBFOX2, U2AF1, WTAP, SNRPB2, DNAJC17, SNRPN, SRSF6, KHDRBS1, CDC5L, MFAP1, CWF19L2, SNRPE, SF3B2, DDX20, SNRPD3, SFSWAP, PRPF8, SF3A1, SNRPD2, BUD13, CWC25, YTHDC1, CELF2, RBM5, DDX23, CELF1, FMR1, SRPK1, SRPK2, SF…
GO:0000398_mRNA_splicing,_via_spliceosome	-0.0932	-0.148	0.608	0.608	ENSECAG00000008939, ENSECAG00000026981, ENSECAG00000009113, ENSECAG00000007560, ENSECAG00000019601, ENSECAG00000007824, ENSECAG00000019989, ENSECAG00000010769, ENSECAG00000021380, ENSECAG00000022215, ENSECAG00000014258, ENSECAG00000007554, ENSECAG00000041724, ENSECAG00000007955, ENSECAG00000026848, ENSECAG00000010194, ENSECAG00000024151, ENSECAG00000013314, ENSECAG00000020667, ENSECAG00000008833,…	RBM17, SRRM1, PRPF40A, FXR1, DHX8, SNRPD2, SNRPG, CWC22, RBMX, CRNKL1, PLRG1, GEMIN2, UBL5, HNRNPU, SNRPC, KHDRBS3, BUD31, CWC15, PRPF31, SPEN, PRPF6, SCAF11, SRSF1, QKI, SF3A3, DDX46, RBFOX2, U2AF1, WTAP, SNRPB2, DNAJC17, SNRPN, SRSF6, KHDRBS1, CDC5L, MFAP1, CWF19L2, SNRPE, SF3B2, DDX20, SNRPD3, SFSWAP, PRPF8, SF3A1, SNRPD2, BUD13, CWC25, YTHDC1, CELF2, RBM5, DDX23, CELF1, FMR1, SRPK1, SRPK2, SF…
GO:0010564_regulation_of_cell_cycle_process	-0.442	-0.64	0.608	0.608	ENSECAG00000023961, ENSECAG00000021147, ENSECAG00000000354, ENSECAG00000020524, ENSECAG00000016925, ENSECAG00000010056, ENSECAG00000014575, ENSECAG00000013845, ENSECAG00000018235, ENSECAG00000007955, ENSECAG00000005178, ENSECAG00000007006, ENSECAG00000006869, ENSECAG00000014542, ENSECAG00000021916, ENSECAG00000009913, ENSECAG00000012903, ENSECAG00000021452, ENSECAG00000021950, ENSECAG00000003634,…	AURKA, ATM, PLK2, MRNIP, WAPL, C1H10orf90, RB1, HUS1, AVEN, HNRNPU, CCSAP, ANAPC1, MAP9, SPICE1, CEP120, CDC6, WDR76, BUB1B, NPM1, RHNO1, CDK2, TIPIN, CDCA2, FBXO5, ZNF830, ZWILCH, TICRR, SENP6, WEE2, CDK4, PLK1, CDC25C, DBF4, MTBP, CSNK2A2, CEP295, BUB3, KNSTRN, NABP1, TTK, ENTR1, BUB1
GO:0051304_chromosome_separation	-0.515	-0.676	0.592	0.608	ENSECAG00000007006, ENSECAG00000021452, ENSECAG00000018367, ENSECAG00000014130, ENSECAG00000010047, ENSECAG00000022722, ENSECAG00000023776, ENSECAG00000013053, ENSECAG00000017103	ANAPC1, BUB1B, ZWILCH, CSNK2A2, BUB3, ESPL1, TTK, TOP2A, BUB1
GO:0010556_regulation_of_macromolecule_biosynthetic_process	-0.39	-1.09	0.584	0.608	ENSECAG00000024766, ENSECAG00000005798, ENSECAG00000021000, ENSECAG00000013186, ENSECAG00000024130, ENSECAG00000022262, ENSECAG00000000648, ENSECAG00000014979, ENSECAG00000011749, ENSECAG00000001582, ENSECAG00000011357, ENSECAG00000007240, ENSECAG00000024605, ENSECAG00000012780, ENSECAG00000022110, ENSECAG00000006101, ENSECAG00000005699, ENSECAG00000016520, ENSECAG00000018169, ENSECAG00000014283,…	CREBBP, CNOT7, PAX6, WWC3, ZNF609, BRWD1, LCORL, AFAP1L2, MSX2, CNOT6L, GATAD2B, CYLD, SIN3A, CBX3, ASXL1, ZBTB39, SERTAD3, ZHX3, RREB1, NCOA7, BNC2, BRD4, ATF2, HMGB3, DRGX, HEY2, BRD7, CAMTA1, FXR1, EGR1, ZFHX4, AKAP13, CREB3L2, NUP35, SFPQ, HEATR1, SOHLH2, CDK7, FOXO1, BRWD3, YTHDF1, RIPK2, PCGF6, PHF1, TADA2A, NSD3, TET3, ELK3, LPIN2, ARID4A, TRPS1, WBP2, MED13, SMAD6, HMX1, MTA3, ZBTB21, SUP…
GO:2000112_regulation_of_cellular_macromolecule_biosynthetic_process	-0.39	-1.09	0.584	0.608	ENSECAG00000024766, ENSECAG00000005798, ENSECAG00000021000, ENSECAG00000013186, ENSECAG00000024130, ENSECAG00000022262, ENSECAG00000000648, ENSECAG00000014979, ENSECAG00000011749, ENSECAG00000001582, ENSECAG00000011357, ENSECAG00000007240, ENSECAG00000024605, ENSECAG00000012780, ENSECAG00000022110, ENSECAG00000006101, ENSECAG00000005699, ENSECAG00000016520, ENSECAG00000018169, ENSECAG00000014283,…	CREBBP, CNOT7, PAX6, WWC3, ZNF609, BRWD1, LCORL, AFAP1L2, MSX2, CNOT6L, GATAD2B, CYLD, SIN3A, CBX3, ASXL1, ZBTB39, SERTAD3, ZHX3, RREB1, NCOA7, BNC2, BRD4, ATF2, HMGB3, DRGX, HEY2, BRD7, CAMTA1, FXR1, EGR1, ZFHX4, AKAP13, CREB3L2, NUP35, SFPQ, HEATR1, SOHLH2, CDK7, FOXO1, BRWD3, YTHDF1, RIPK2, PCGF6, PHF1, TADA2A, NSD3, TET3, ELK3, LPIN2, ARID4A, TRPS1, WBP2, MED13, SMAD6, HMX1, MTA3, ZBTB21, SUP…
GO:1901575_organic_substance_catabolic_process	-0.522	-0.876	0.576	0.608	ENSECAG00000005798, ENSECAG00000020144, ENSECAG00000024205, ENSECAG00000001582, ENSECAG00000006545, ENSECAG00000018988, ENSECAG00000014582, ENSECAG00000028965, ENSECAG00000011935, ENSECAG00000017022, ENSECAG00000020881, ENSECAG00000000162, ENSECAG00000011728, ENSECAG00000035031, ENSECAG00000010812, ENSECAG00000011878, ENSECAG00000007560, ENSECAG00000012970, ENSECAG00000024327, ENSECAG00000011694,…	CNOT7, UBXN2A, HSPA5, CNOT6L, NSFL1C, XRN2, UFL1, NEDD8, SMURF2, UPF2, CTSC, TRIP12, PYGL, UBB, EDC4, DTL, FXR1, FAF2, FBXL5, ZNRF3, YTHDF1, ELOC, LPIN2, ZCCHC17, PLA2G4A, KLHL22, PCYOX1L, HUWE1, APC, ABHD17A, GNPDA2, HNRNPU, FBXO11, RNF111, ECI1, ABHD17B, KCTD13, TBC1D22B, ARIH1, FBXO45, YTHDF2, ANAPC1, BFAR, RNF130, PCNA, EXOSC9, PM20D2, SAMD4B, UBE2D1, PLAA, DERL2, UBQLN1, UBE2S, AMN1, RNF34, …
GO:0051173_positive_regulation_of_nitrogen_compound_metabolic_process	-0.39	-1.17	0.56	0.608	ENSECAG00000012810, ENSECAG00000024766, ENSECAG00000005798, ENSECAG00000011567, ENSECAG00000020286, ENSECAG00000023233, ENSECAG00000014979, ENSECAG00000001582, ENSECAG00000022110, ENSECAG00000005699, ENSECAG00000030438, ENSECAG00000006638, ENSECAG00000007560, ENSECAG00000020071, ENSECAG00000021443, ENSECAG00000014570, ENSECAG00000019475, ENSECAG00000025118, ENSECAG00000011391, ENSECAG00000006280,…	TNKS2, CREBBP, CNOT7, UIMC1, BIRC7, BMP15, AFAP1L2, CNOT6L, ASXL1, SERTAD3, BRD4, CASP8AP2, FXR1, XIAP, HEATR1, CDK7, YTHDF1, TADA2A, TET3, LPIN2, PDCD10, WBP2, RBMX, HUWE1, APC, HNRNPU, RNF111, SSBP3, SMARCA2, BIRC5, ICE2, THRA, ARIH1, LEO1, BMP6, YTHDF2, EXOSC9, MTF1, DYRK1A, SAMD4B, SDCBP, NUP85, TCEA1, EDRF1, NGF, LMO3, PTOV1, MED10, ELL, PRRC1, ISL2, UACA, CNOT3, PTMS, NPM1, EXOSC8, CNBP, ME…
GO:0031329_regulation_of_cellular_catabolic_process	-0.522	-1.19	0.56	0.608	ENSECAG00000005798, ENSECAG00000001582, ENSECAG00000014582, ENSECAG00000007560, ENSECAG00000005374, ENSECAG00000019475, ENSECAG00000025040, ENSECAG00000007955, ENSECAG00000019466, ENSECAG00000023108, ENSECAG00000024732, ENSECAG00000015551, ENSECAG00000005729, ENSECAG00000010723, ENSECAG00000023181, ENSECAG00000017195, ENSECAG00000012606, ENSECAG00000010405, ENSECAG00000012464, ENSECAG00000012956,…	CNOT7, CNOT6L, UFL1, FXR1, WAC, YTHDF1, ZCCHC17, HNRNPU, ARIH1, YTHDF2, EXOSC9, SAMD4B, RRAGA, ANGEL2, CNOT3, NPRL3, EXOSC8, TRIB2, SYNCRIP, DCPS, TIGAR, SH3RF1, TNRC6B, TMEM39A, SVIP, NUB1, FMR1, FASTKD2, CDC20
GO:0140352_export_from_cell	-0.529	-0.618	0.64	0.616	ENSECAG00000024970, ENSECAG00000013384, ENSECAG00000008013, ENSECAG00000024272, ENSECAG00000019725, ENSECAG00000024021, ENSECAG00000016551, ENSECAG00000014117, ENSECAG00000016134, ENSECAG00000019655, ENSECAG00000023865, ENSECAG00000017044, ENSECAG00000024623, ENSECAG00000019791, ENSECAG00000016434, ENSECAG00000022427, ENSECAG00000017553, ENSECAG00000012588, ENSECAG00000024593, ENSECAG00000008168,…	KCNQ1, STX3, NMB, RIMS1, SYT11, CADPS2, RAB13, VAMP7, RAB11FIP1, SVBP, RAB11A, RALA, ATP1A1, RAB11FIP2, RAP1A, UNC13C, SEPTIN2, DTNBP1, SLC35G1, EXOC5, EXOC3, RAB3IP, STX2, ATP1B1, LLGL2
GO:0031396_regulation_of_protein_ubiquitination	-0.586	-0.661	0.616	0.616	ENSECAG00000020286, ENSECAG00000020071, ENSECAG00000019655, ENSECAG00000008466, ENSECAG00000037284, ENSECAG00000012229, ENSECAG00000021365, ENSECAG00000033949	BIRC7, XIAP, SVBP, BIRC5, WDR70, BIRC3, DCUN1D1, OTUB1
GO:1903320_regulation_of_protein_modification_by_small_protein_conjugation_or_removal	-0.586	-0.661	0.616	0.616	ENSECAG00000020286, ENSECAG00000020071, ENSECAG00000019655, ENSECAG00000008466, ENSECAG00000037284, ENSECAG00000012229, ENSECAG00000021365, ENSECAG00000033949	BIRC7, XIAP, SVBP, BIRC5, WDR70, BIRC3, DCUN1D1, OTUB1
GO:0009967_positive_regulation_of_signal_transduction	-0.5	-0.818	0.608	0.616	ENSECAG00000012810, ENSECAG00000023233, ENSECAG00000014979, ENSECAG00000007240, ENSECAG00000013569, ENSECAG00000009706, ENSECAG00000005374, ENSECAG00000006518, ENSECAG00000023011, ENSECAG00000017911, ENSECAG00000015363, ENSECAG00000014371, ENSECAG00000024602, ENSECAG00000021238, ENSECAG00000020015, ENSECAG00000007654, ENSECAG00000015053, ENSECAG00000005729, ENSECAG00000008715, ENSECAG00000021821,…	TNKS2, BMP15, AFAP1L2, CYLD, LAMTOR3, AKAP13, WAC, SLC39A10, RIPK2, PDCD10, KLHL22, CSNK1G2, RNF111, IGF1R, BMP6, KLHDC10, SDCBP, RRAGA, TMEM9B, LAMTOR5, TRAF6, TICAM2, CSNK1G3, TMED4, SH3RF1, LAMTOR1, SRARP, SMO, GDF9, CAPRIN2, BCL10, LAMTOR4, PPM1B, NET1
GO:0006397_mRNA_processing	-0.0895	-0.126	0.6	0.616	ENSECAG00000008939, ENSECAG00000026981, ENSECAG00000009113, ENSECAG00000007560, ENSECAG00000019601, ENSECAG00000007824, ENSECAG00000019989, ENSECAG00000010769, ENSECAG00000021380, ENSECAG00000022215, ENSECAG00000014258, ENSECAG00000007554, ENSECAG00000041724, ENSECAG00000007955, ENSECAG00000026848, ENSECAG00000010194, ENSECAG00000024151, ENSECAG00000013314, ENSECAG00000009859, ENSECAG00000020667,…	RBM17, SRRM1, PRPF40A, FXR1, DHX8, SNRPD2, SNRPG, CWC22, RBMX, CRNKL1, PLRG1, GEMIN2, UBL5, HNRNPU, SNRPC, KHDRBS3, BUD31, CWC15, PAPOLG, PRPF31, EXOSC9, SPEN, PRPF6, SCAF11, SRSF1, QKI, SF3A3, DDX46, RBFOX2, U2AF1, PAPOLA, EXOSC8, WTAP, SNRPB2, DNAJC17, SNRPN, SRSF6, KHDRBS1, CDC5L, MFAP1, CWF19L2, CPSF2, SLBP, SNRPE, SF3B2, DDX20, CMTR1, SNRPD3, SFSWAP, PRPF8, SF3A1, WDR33, SNRPD2, BUD13, PCF11…
GO:0090407_organophosphate_biosynthetic_process	-0.455	-0.581	0.584	0.616	ENSECAG00000019837, ENSECAG00000014481, ENSECAG00000015019, ENSECAG00000024684, ENSECAG00000029282, ENSECAG00000021725, ENSECAG00000006875, ENSECAG00000023644, ENSECAG00000021699, ENSECAG00000007464, ENSECAG00000023269, ENSECAG00000021678, ENSECAG00000011752, ENSECAG00000033344, ENSECAG00000017534, ENSECAG00000012512, ENSECAG00000009708, ENSECAG00000018813, ENSECAG00000021665, ENSECAG00000009780,…	PIK3R1, AGPAT1, PIK3CA, ATP5F1C, UQCRQ, TFDP2, IP6K2, PPAT, SOCS7, RRM2, GMPS, PAPSS1, ATG14, PIK3R3, HPRT1, COX6A1, UMPS, GUCY2C, SGMS2, UQCRB, COX4I1, RRM1, ATP5F1E, NAMPT, CHKA, TYMS, PANK3, NDUFB6, COX5B, NDUFS6, PPIP5K2
GO:0009889_regulation_of_biosynthetic_process	-0.4	-1.1	0.584	0.616	ENSECAG00000024766, ENSECAG00000005798, ENSECAG00000021000, ENSECAG00000013186, ENSECAG00000024130, ENSECAG00000022262, ENSECAG00000000648, ENSECAG00000014979, ENSECAG00000011749, ENSECAG00000001582, ENSECAG00000011357, ENSECAG00000007240, ENSECAG00000024605, ENSECAG00000012780, ENSECAG00000022110, ENSECAG00000006101, ENSECAG00000005699, ENSECAG00000016520, ENSECAG00000018169, ENSECAG00000014283,…	CREBBP, CNOT7, PAX6, WWC3, ZNF609, BRWD1, LCORL, AFAP1L2, MSX2, CNOT6L, GATAD2B, CYLD, SIN3A, CBX3, ASXL1, ZBTB39, SERTAD3, ZHX3, RREB1, NCOA7, BNC2, BRD4, ATF2, HMGB3, DRGX, HEY2, BRD7, CAMTA1, FXR1, EGR1, ZFHX4, AKAP13, CREB3L2, NUP35, SFPQ, HEATR1, SOHLH2, CDK7, FOXO1, BRWD3, YTHDF1, RIPK2, PCGF6, PHF1, TADA2A, NSD3, TET3, ELK3, LPIN2, ARID4A, TRPS1, WBP2, MED13, SMAD6, HMX1, MTA3, ZBTB21, SUP…
GO:0031326_regulation_of_cellular_biosynthetic_process	-0.4	-1.1	0.584	0.616	ENSECAG00000024766, ENSECAG00000005798, ENSECAG00000021000, ENSECAG00000013186, ENSECAG00000024130, ENSECAG00000022262, ENSECAG00000000648, ENSECAG00000014979, ENSECAG00000011749, ENSECAG00000001582, ENSECAG00000011357, ENSECAG00000007240, ENSECAG00000024605, ENSECAG00000012780, ENSECAG00000022110, ENSECAG00000006101, ENSECAG00000005699, ENSECAG00000016520, ENSECAG00000018169, ENSECAG00000014283,…	CREBBP, CNOT7, PAX6, WWC3, ZNF609, BRWD1, LCORL, AFAP1L2, MSX2, CNOT6L, GATAD2B, CYLD, SIN3A, CBX3, ASXL1, ZBTB39, SERTAD3, ZHX3, RREB1, NCOA7, BNC2, BRD4, ATF2, HMGB3, DRGX, HEY2, BRD7, CAMTA1, FXR1, EGR1, ZFHX4, AKAP13, CREB3L2, NUP35, SFPQ, HEATR1, SOHLH2, CDK7, FOXO1, BRWD3, YTHDF1, RIPK2, PCGF6, PHF1, TADA2A, NSD3, TET3, ELK3, LPIN2, ARID4A, TRPS1, WBP2, MED13, SMAD6, HMX1, MTA3, ZBTB21, SUP…
GO:0000904_cell_morphogenesis_involved_in_differentiation	-0.0372	-0.617	0.536	0.616	ENSECAG00000019993, ENSECAG00000007560, ENSECAG00000023274, ENSECAG00000009111, ENSECAG00000008303, ENSECAG00000010553, ENSECAG00000020281, ENSECAG00000017840, ENSECAG00000022329, ENSECAG00000009523, ENSECAG00000022405, ENSECAG00000000558, ENSECAG00000000529, ENSECAG00000015935, ENSECAG00000000751, ENSECAG00000004904, ENSECAG00000032992, ENSECAG00000015935, ENSECAG00000032767, ENSECAG00000024672,…	KALRN, FXR1, LAMA5, RUFY3, LAMB1, NGF, PAK2, PAK1, LRRC4C, ISL2, NOTCH1, KIF5B, MAP1S, ACTB, NEDD4L, SMO, TIAM1, ACTB, FMR1, UNK, ENAH
GO:0000054_ribosomal_subunit_export_from_nucleus	-0.566	-0.599	0.632	0.624	ENSECAG00000024920, ENSECAG00000007602, ENSECAG00000010701, ENSECAG00000012800, ENSECAG00000020532, ENSECAG00000021950, ENSECAG00000004492, ENSECAG00000016212	XPO1, LTV1, EIF6, NUP88, RAN, NPM1, RRS1, SDAD1
GO:0019693_ribose_phosphate_metabolic_process	-0.436	-0.604	0.616	0.624	ENSECAG00000024684, ENSECAG00000029282, ENSECAG00000023269, ENSECAG00000021678, ENSECAG00000017534, ENSECAG00000012512, ENSECAG00000009708, ENSECAG00000018813, ENSECAG00000019133, ENSECAG00000009780, ENSECAG00000011722, ENSECAG00000023658, ENSECAG00000019319, ENSECAG00000007644, ENSECAG00000025162, ENSECAG00000020948, ENSECAG00000028274, ENSECAG00000007968, ENSECAG00000021690, ENSECAG00000019618,…	ATP5F1C, UQCRQ, GMPS, PAPSS1, HPRT1, COX6A1, UMPS, GUCY2C, TIGAR, UQCRB, COX4I1, NUDT5, NUDT4, PKM, ATP5F1E, PANK3, NDUFB6, COX5B, NDUFS6, FAR1, ACSL3, SUCLA2, ACOT9
GO:0016071_mRNA_metabolic_process	-0.256	-0.405	0.6	0.624	ENSECAG00000005798, ENSECAG00000008939, ENSECAG00000001582, ENSECAG00000018988, ENSECAG00000017022, ENSECAG00000026981, ENSECAG00000009113, ENSECAG00000010812, ENSECAG00000007560, ENSECAG00000019601, ENSECAG00000019475, ENSECAG00000007824, ENSECAG00000019989, ENSECAG00000010769, ENSECAG00000021380, ENSECAG00000022215, ENSECAG00000014258, ENSECAG00000007554, ENSECAG00000041724, ENSECAG00000007955,…	CNOT7, RBM17, CNOT6L, XRN2, UPF2, SRRM1, PRPF40A, EDC4, FXR1, DHX8, YTHDF1, SNRPD2, SNRPG, CWC22, RBMX, CRNKL1, PLRG1, GEMIN2, UBL5, HNRNPU, SNRPC, KHDRBS3, YTHDF2, BUD31, CWC15, PAPOLG, PRPF31, EXOSC9, SAMD4B, SPEN, PRPF6, SCAF11, SRSF1, QKI, SF3A3, DDX46, ANGEL2, RBFOX2, U2AF1, CNOT3, PAPOLA, EXOSC8, WTAP, SNRPB2, DNAJC17, SNRPN, SRSF6, KHDRBS1, CDC5L, MFAP1, CWF19L2, CPSF2, SLBP, UPF3A, SYNCRI…
GO:0031323_regulation_of_cellular_metabolic_process	-0.277	-1.03	0.584	0.624	ENSECAG00000021289, ENSECAG00000012810, ENSECAG00000024766, ENSECAG00000005798, ENSECAG00000011567, ENSECAG00000021000, ENSECAG00000013186, ENSECAG00000024130, ENSECAG00000022262, ENSECAG00000020286, ENSECAG00000023233, ENSECAG00000000648, ENSECAG00000017056, ENSECAG00000014979, ENSECAG00000011749, ENSECAG00000001582, ENSECAG00000010827, ENSECAG00000011357, ENSECAG00000007240, ENSECAG00000019837,…	CCNE1, TNKS2, CREBBP, CNOT7, UIMC1, PAX6, WWC3, ZNF609, BRWD1, BIRC7, BMP15, LCORL, BTBD10, AFAP1L2, MSX2, CNOT6L, TEX15, GATAD2B, CYLD, PIK3R1, SIN3A, CBX3, UFL1, ASXL1, ZBTB39, SERTAD3, ZHX3, MATR3, RREB1, NCOA7, BNC2, BRD4, SRRM1, CASP8AP2, ATF2, HMGB3, DPPA3, DRGX, HEY2, BRD7, CAMTA1, FXR1, EGR1, ZFHX4, AKAP13, CREB3L2, NUP35, WAC, XIAP, SFPQ, HEATR1, SOHLH2, CDK7, FOXO1, BRWD3, YTHDF1, RIPK2…
GO:0030182_neuron_differentiation	-0.0807	-0.599	0.552	0.624	ENSECAG00000019993, ENSECAG00000007560, ENSECAG00000023274, ENSECAG00000006665, ENSECAG00000009111, ENSECAG00000011669, ENSECAG00000005815, ENSECAG00000010553, ENSECAG00000020281, ENSECAG00000003887, ENSECAG00000011938, ENSECAG00000017840, ENSECAG00000022329, ENSECAG00000009523, ENSECAG00000008730, ENSECAG00000021359, ENSECAG00000022405, ENSECAG00000000558, ENSECAG00000000529, ENSECAG00000025119,…	KALRN, FXR1, LAMA5, GPM6B, RUFY3, TNN, LLPH, NGF, PAK2, PBX2, MANF, PAK1, LRRC4C, ISL2, MAP4K4, RTN3, NOTCH1, KIF5B, MAP1S, FRYL, ZFHX3, ACTB, NEDD4L, DTNBP1, SMO, TIAM1, ACTB, VAPA, FMR1, UNK, ACSL3, ENAH, TAOK3, PPP1R9B, LHX8, GSK3B
GO:0006270_DNA_replication_initiation	-0.489	-0.484	0.648	0.632	ENSECAG00000021720, ENSECAG00000007182, ENSECAG00000024473, ENSECAG00000014368, ENSECAG00000013090, ENSECAG00000007885, ENSECAG00000019631, ENSECAG00000021453	NOC3L, ORC6, MCM10, MCM5, POLA1, ORC5, MCM2, TICRR
GO:0006405_RNA_export_from_nucleus	-0.453	-0.546	0.648	0.632	ENSECAG00000011555, ENSECAG00000019159, ENSECAG00000016010, ENSECAG00000012800, ENSECAG00000020724, ENSECAG00000022752, ENSECAG00000010431, ENSECAG00000017046, ENSECAG00000021950, ENSECAG00000007483, ENSECAG00000023565, ENSECAG00000009694, ENSECAG00000000708	THOC3, NUP85, NUP153, NUP88, TPR, NUP214, THOC2, THOC6, NPM1, NUP107, ENY2, IWS1, SARNP
GO:0045892_negative_regulation_of_transcription,_DNA-templated	-0.57	-0.881	0.648	0.632	ENSECAG00000011357, ENSECAG00000024605, ENSECAG00000012780, ENSECAG00000006101, ENSECAG00000032622, ENSECAG00000023512, ENSECAG00000000178, ENSECAG00000007955, ENSECAG00000036584, ENSECAG00000023366, ENSECAG00000007205, ENSECAG00000006289, ENSECAG00000016028, ENSECAG00000020475, ENSECAG00000023322, ENSECAG00000011120, ENSECAG00000010349, ENSECAG00000013508, ENSECAG00000010489, ENSECAG00000022010,…	GATAD2B, SIN3A, CBX3, ZBTB39, HMX1, MTA3, RUNX1T1, HNRNPU, SKOR1, SUDS3, ZBTB33, NCOR1, N4BP2L2, MIER1, ID3, THRA, CIART, SAP18, BRMS1, ZNF684, PER2, DNMT3A, GATAD2A, SMARCE1, NR1H2, CBFA2T2, PCGF1, LDB1, CHD8, MTA2, SAP130, CTCF, BCL6B, NKAP, LYAR, URI1, PCGF2, PHF21A, CIR1, CHD4, VGLL4, CBX1, CBX5
GO:1902679_negative_regulation_of_RNA_biosynthetic_process	-0.57	-0.881	0.648	0.632	ENSECAG00000011357, ENSECAG00000024605, ENSECAG00000012780, ENSECAG00000006101, ENSECAG00000032622, ENSECAG00000023512, ENSECAG00000000178, ENSECAG00000007955, ENSECAG00000036584, ENSECAG00000023366, ENSECAG00000007205, ENSECAG00000006289, ENSECAG00000016028, ENSECAG00000020475, ENSECAG00000023322, ENSECAG00000011120, ENSECAG00000010349, ENSECAG00000013508, ENSECAG00000010489, ENSECAG00000022010,…	GATAD2B, SIN3A, CBX3, ZBTB39, HMX1, MTA3, RUNX1T1, HNRNPU, SKOR1, SUDS3, ZBTB33, NCOR1, N4BP2L2, MIER1, ID3, THRA, CIART, SAP18, BRMS1, ZNF684, PER2, DNMT3A, GATAD2A, SMARCE1, NR1H2, CBFA2T2, PCGF1, LDB1, CHD8, MTA2, SAP130, CTCF, BCL6B, NKAP, LYAR, URI1, PCGF2, PHF21A, CIR1, CHD4, VGLL4, CBX1, CBX5
GO:1903507_negative_regulation_of_nucleic_acid-templated_transcription	-0.57	-0.881	0.648	0.632	ENSECAG00000011357, ENSECAG00000024605, ENSECAG00000012780, ENSECAG00000006101, ENSECAG00000032622, ENSECAG00000023512, ENSECAG00000000178, ENSECAG00000007955, ENSECAG00000036584, ENSECAG00000023366, ENSECAG00000007205, ENSECAG00000006289, ENSECAG00000016028, ENSECAG00000020475, ENSECAG00000023322, ENSECAG00000011120, ENSECAG00000010349, ENSECAG00000013508, ENSECAG00000010489, ENSECAG00000022010,…	GATAD2B, SIN3A, CBX3, ZBTB39, HMX1, MTA3, RUNX1T1, HNRNPU, SKOR1, SUDS3, ZBTB33, NCOR1, N4BP2L2, MIER1, ID3, THRA, CIART, SAP18, BRMS1, ZNF684, PER2, DNMT3A, GATAD2A, SMARCE1, NR1H2, CBFA2T2, PCGF1, LDB1, CHD8, MTA2, SAP130, CTCF, BCL6B, NKAP, LYAR, URI1, PCGF2, PHF21A, CIR1, CHD4, VGLL4, CBX1, CBX5
GO:0042391_regulation_of_membrane_potential	-0.805	-0.813	0.64	0.632	ENSECAG00000024272, ENSECAG00000023360, ENSECAG00000019132, ENSECAG00000010585, ENSECAG00000009313	RIMS1, KCNK10, SLMAP, KCNK7, KCNK1
GO:0070887_cellular_response_to_chemical_stimulus	-0.717	-0.991	0.64	0.632	ENSECAG00000023233, ENSECAG00000024205, ENSECAG00000019837, ENSECAG00000011935, ENSECAG00000013569, ENSECAG00000013300, ENSECAG00000019725, ENSECAG00000000138, ENSECAG00000016551, ENSECAG00000006280, ENSECAG00000013706, ENSECAG00000029421, ENSECAG00000024243, ENSECAG00000036584, ENSECAG00000024602, ENSECAG00000016346, ENSECAG00000011120, ENSECAG00000014594, ENSECAG00000015053, ENSECAG00000005729,…	BMP15, HSPA5, PIK3R1, SMURF2, LAMTOR3, CXCL10, SYT11, ACVR2A, RAB13, LPIN2, SMAD6, HSPA2, GNAS, SKOR1, RNF111, LEPROT, THRA, EPAS1, SDCBP, RRAGA, SMAD1, DERL2, NGF, IRAK2, HSPA8, SMAD2, ERBIN, PIK3R3, CGAS, LYPD1, ADH5, LAMTOR5, SMAD3, ADIPOR2, LIFR, ADH5, TRAF6, SMAD5, TICAM2, RAP1A, EIF4E1B, AMFR, FGF16, JAK1, SELENOS, CPNE3, SERP1, LAMTOR1, PRDX2, SRARP, HIF1A, NCOA1, IL13RA1, GDF9, PKM, SPATA…
GO:1902600_proton_transmembrane_transport	-0.637	-0.819	0.632	0.632	ENSECAG00000024684, ENSECAG00000029282, ENSECAG00000024623, ENSECAG00000012512, ENSECAG00000009780, ENSECAG00000011722, ENSECAG00000025162, ENSECAG00000028274, ENSECAG00000007968, ENSECAG00000021690	ATP5F1C, UQCRQ, ATP1A1, COX6A1, UQCRB, COX4I1, ATP5F1E, NDUFB6, COX5B, NDUFS6
GO:0043069_negative_regulation_of_programmed_cell_death	-0.666	-0.859	0.624	0.632	ENSECAG00000008992, ENSECAG00000020286, ENSECAG00000019545, ENSECAG00000031204, ENSECAG00000020071, ENSECAG00000008466, ENSECAG00000010553, ENSECAG00000022379, ENSECAG00000042372, ENSECAG00000011461, ENSECAG00000019133, ENSECAG00000021240, ENSECAG00000005267, ENSECAG00000015502, ENSECAG00000012229, ENSECAG00000018209, ENSECAG00000008636	HYPK, BIRC7, BIRC6, PIM3, XIAP, BIRC5, NGF, RNF34, PTMS, ARMC10, TIGAR, SH3RF1, BAG3, RFFL, BIRC3, CAAP1, EYA1
GO:0006914_autophagy	-0.509	-0.584	0.656	0.64	ENSECAG00000020144, ENSECAG00000006545, ENSECAG00000005374, ENSECAG00000013971, ENSECAG00000022114, ENSECAG00000012452, ENSECAG00000003759, ENSECAG00000011954, ENSECAG00000000965, ENSECAG00000005729, ENSECAG00000011752, ENSECAG00000017195, ENSECAG00000016091, ENSECAG00000020653, ENSECAG00000036783, ENSECAG00000011036	UBXN2A, NSFL1C, WAC, ATG5, WIPI2, ATG12, TBC1D14, ATG3, ATG2B, RRAGA, ATG14, NPRL3, ATG16L1, TMEM39A, SVIP, NRBF2
GO:0061919_process_utilizing_autophagic_mechanism	-0.509	-0.584	0.656	0.64	ENSECAG00000020144, ENSECAG00000006545, ENSECAG00000005374, ENSECAG00000013971, ENSECAG00000022114, ENSECAG00000012452, ENSECAG00000003759, ENSECAG00000011954, ENSECAG00000000965, ENSECAG00000005729, ENSECAG00000011752, ENSECAG00000017195, ENSECAG00000016091, ENSECAG00000020653, ENSECAG00000036783, ENSECAG00000011036	UBXN2A, NSFL1C, WAC, ATG5, WIPI2, ATG12, TBC1D14, ATG3, ATG2B, RRAGA, ATG14, NPRL3, ATG16L1, TMEM39A, SVIP, NRBF2
GO:0046474_glycerophospholipid_biosynthetic_process	-0.568	-0.638	0.648	0.64	ENSECAG00000019837, ENSECAG00000014481, ENSECAG00000015019, ENSECAG00000006875, ENSECAG00000021699, ENSECAG00000011752, ENSECAG00000033344, ENSECAG00000011539	PIK3R1, AGPAT1, PIK3CA, IP6K2, SOCS7, ATG14, PIK3R3, CHKA
GO:0048856_anatomical_structure_development	-0.373	-0.742	0.624	0.64	ENSECAG00000017807, ENSECAG00000021000, ENSECAG00000022262, ENSECAG00000024869, ENSECAG00000011749, ENSECAG00000014820, ENSECAG00000019993, ENSECAG00000020528, ENSECAG00000022110, ENSECAG00000010318, ENSECAG00000028670, ENSECAG00000018333, ENSECAG00000038178, ENSECAG00000016797, ENSECAG00000007560, ENSECAG00000001445, ENSECAG00000014600, ENSECAG00000007187, ENSECAG00000023274, ENSECAG00000021002,…	NAV2, PAX6, BRWD1, C6H12orf57, MSX2, DSP, KALRN, TJP1, ASXL1, CEP63, DPPA3, EZR, HEY2, IGF2BP3, FXR1, CHD7, TRAK1, BRWD3, LAMA5, ROCK1, KDM6A, GPM6B, APC, SMAD6, RUFY3, TNN, IGF1R, LAMB1, PTPN14, GCM2, FBXO45, CDH10, LLPH, CEP120, HEY1, MTF1, MSN, CLSTN1, TACC1, FMNL2, SMAD1, NGF, PAK2, PBX2, MANF, PAK1, SOX6, SMAD2, RBFOX2, MSX1, MFF, LRRC4C, ISL2, LMOD3, MAP4K4, SMAD3, FGFR1, RTN3, SMAD5, NOTCH…
GO:0009895_negative_regulation_of_catabolic_process	-0.631	-0.753	0.704	0.648	ENSECAG00000025040, ENSECAG00000007955, ENSECAG00000010723, ENSECAG00000012464, ENSECAG00000019133, ENSECAG00000020653, ENSECAG00000036783, ENSECAG00000000420	ZCCHC17, HNRNPU, ANGEL2, SYNCRIP, TIGAR, TMEM39A, SVIP, BANP
GO:0006376_mRNA_splice_site_selection	-0.294	-0.285	0.664	0.648	ENSECAG00000026848, ENSECAG00000023932, ENSECAG00000007657, ENSECAG00000006649, ENSECAG00000007741, ENSECAG00000012760	SNRPC, SRSF6, SFSWAP, CELF2, CELF1, LUC7L3
GO:0007059_chromosome_segregation	-0.345	-0.415	0.664	0.648	ENSECAG00000016155, ENSECAG00000010827, ENSECAG00000016913, ENSECAG00000016925, ENSECAG00000020174, ENSECAG00000012899, ENSECAG00000009163, ENSECAG00000016495, ENSECAG00000018233, ENSECAG00000017906, ENSECAG00000007955, ENSECAG00000015641, ENSECAG00000017824, ENSECAG00000023019, ENSECAG00000007006, ENSECAG00000014542, ENSECAG00000007470, ENSECAG00000019776, ENSECAG00000016392, ENSECAG00000021452,…	KIF18A, TEX15, MEIKIN, WAPL, CENPW, ESCO2, NUF2, NUSAP1, NIPBL, PRC1, HNRNPU, DSCC1, TERB1, KIF18B, ANAPC1, SPICE1, NCAPG, SMC1A, RAD21, BUB1B, TOP1MT, WRAP73, CDCA8, SMC1B, CDCA2, ZWILCH, STAG1, CCNB1, NCAPD3, PHF13, CSNK2A2, BUB3, KNSTRN, NCAPH, ESPL1, TOP1, CENPC, TTK, TOP2A, TUBG1, ESCO1, SPC25, NCAPG2, BUB1, NDC80
GO:0043547_positive_regulation_of_GTPase_activity	-0.462	-0.421	0.664	0.648	ENSECAG00000011917, ENSECAG00000024937, ENSECAG00000003759, ENSECAG00000024286, ENSECAG00000009393, ENSECAG00000006011, ENSECAG00000012024, ENSECAG00000014059, ENSECAG00000032992, ENSECAG00000023646	DOCK8, TBC1D21, TBC1D14, SIPA1L1, ARHGAP29, RALGPS2, TBC1D8, ECT2, TIAM1, EVI5
GO:0006368_transcription_elongation_from_RNA_polymerase_II_promoter	-0.607	-0.719	0.664	0.648	ENSECAG00000030438, ENSECAG00000014898, ENSECAG00000000466, ENSECAG00000015661, ENSECAG00000021686, ENSECAG00000009118	BRD4, LEO1, ELL, BRDT, SUPT16H, OCLN
GO:0032968_positive_regulation_of_transcription_elongation_from_RNA_polymerase_II_promoter	-0.607	-0.719	0.664	0.648	ENSECAG00000030438, ENSECAG00000014898, ENSECAG00000000466, ENSECAG00000015661, ENSECAG00000021686, ENSECAG00000009118	BRD4, LEO1, ELL, BRDT, SUPT16H, OCLN
GO:0034243_regulation_of_transcription_elongation_from_RNA_polymerase_II_promoter	-0.607	-0.719	0.664	0.648	ENSECAG00000030438, ENSECAG00000014898, ENSECAG00000000466, ENSECAG00000015661, ENSECAG00000021686, ENSECAG00000009118	BRD4, LEO1, ELL, BRDT, SUPT16H, OCLN
GO:0051046_regulation_of_secretion	-0.74	-0.842	0.664	0.648	ENSECAG00000008013, ENSECAG00000019725, ENSECAG00000024021, ENSECAG00000016551, ENSECAG00000017044, ENSECAG00000016434, ENSECAG00000017553, ENSECAG00000012588, ENSECAG00000008614	NMB, SYT11, CADPS2, RAB13, RALA, RAP1A, SEPTIN2, DTNBP1, LLGL2
GO:1903530_regulation_of_secretion_by_cell	-0.74	-0.842	0.664	0.648	ENSECAG00000008013, ENSECAG00000019725, ENSECAG00000024021, ENSECAG00000016551, ENSECAG00000017044, ENSECAG00000016434, ENSECAG00000017553, ENSECAG00000012588, ENSECAG00000008614	NMB, SYT11, CADPS2, RAB13, RALA, RAP1A, SEPTIN2, DTNBP1, LLGL2
GO:0042127_regulation_of_cell_population_proliferation	-0.663	-0.676	0.656	0.648	ENSECAG00000020208, ENSECAG00000009667, ENSECAG00000031442, ENSECAG00000012564, ENSECAG00000015046	LIFR, EAPP, FGF16, BTG4, TFAP2B
GO:0051336_regulation_of_hydrolase_activity	-0.141	-0.223	0.648	0.648	ENSECAG00000006638, ENSECAG00000017205, ENSECAG00000011917, ENSECAG00000024937, ENSECAG00000003759, ENSECAG00000015322, ENSECAG00000024286, ENSECAG00000022379, ENSECAG00000016261, ENSECAG00000009393, ENSECAG00000014289, ENSECAG00000006011, ENSECAG00000021100, ENSECAG00000012024, ENSECAG00000014059, ENSECAG00000015502, ENSECAG00000023605, ENSECAG00000007717, ENSECAG00000018209, ENSECAG00000032992,…	CASP8AP2, CCPG1, DOCK8, TBC1D21, TBC1D14, PPP6R3, SIPA1L1, RNF34, UACA, ARHGAP29, ARHGAP12, RALGPS2, CSNK2B, TBC1D8, ECT2, RFFL, SERPINE3, URI1, CAAP1, TIAM1, CAST, CHN2, PPP1R12A, EVI5, VAV3, RAB3GAP2
GO:0009259_ribonucleotide_metabolic_process	-0.524	-0.705	0.64	0.648	ENSECAG00000024684, ENSECAG00000029282, ENSECAG00000023269, ENSECAG00000021678, ENSECAG00000017534, ENSECAG00000012512, ENSECAG00000009708, ENSECAG00000018813, ENSECAG00000019133, ENSECAG00000009780, ENSECAG00000011722, ENSECAG00000019319, ENSECAG00000007644, ENSECAG00000025162, ENSECAG00000020948, ENSECAG00000028274, ENSECAG00000007968, ENSECAG00000021690, ENSECAG00000019618, ENSECAG00000010765,…	ATP5F1C, UQCRQ, GMPS, PAPSS1, HPRT1, COX6A1, UMPS, GUCY2C, TIGAR, UQCRB, COX4I1, NUDT4, PKM, ATP5F1E, PANK3, NDUFB6, COX5B, NDUFS6, FAR1, ACSL3, SUCLA2, ACOT9
GO:0080135_regulation_of_cellular_response_to_stress	-0.263	-0.848	0.592	0.648	ENSECAG00000011567, ENSECAG00000010827, ENSECAG00000007560, ENSECAG00000021238, ENSECAG00000007654, ENSECAG00000022081, ENSECAG00000012903, ENSECAG00000012231, ENSECAG00000019809, ENSECAG00000021091, ENSECAG00000019133, ENSECAG00000021240, ENSECAG00000036783, ENSECAG00000009958, ENSECAG00000032767, ENSECAG00000008636, ENSECAG00000033949	UIMC1, TEX15, FXR1, IGF1R, KLHDC10, PARG, WDR76, DEK, CGAS, TRAF6, TIGAR, SH3RF1, SVIP, DUSP1, FMR1, EYA1, OTUB1
GO:0010256_endomembrane_system_organization	-1.04	-1.02	0.72	0.656	ENSECAG00000013384, ENSECAG00000020144, ENSECAG00000006545, ENSECAG00000022657, ENSECAG00000020570, ENSECAG00000017911, ENSECAG00000007621, ENSECAG00000000797, ENSECAG00000013265, ENSECAG00000040308, ENSECAG00000000965, ENSECAG00000006321, ENSECAG00000021981, ENSECAG00000021359, ENSECAG00000016918, ENSECAG00000005038, ENSECAG00000006611, ENSECAG00000012588, ENSECAG00000018378, ENSECAG00000007254,…	STX3, UBXN2A, NSFL1C, TMEM170A, LMAN1, PDCD10, TRIP11, SUN2, VAPB, TMED7, ATG2B, GOLPH3, WDR83OS, RTN3, TMED4, WASHC4, USP8, DTNBP1, TRAM1, IZUMO1R, ATL2, SNX9, VAPA, STX2, SEC16A, SUN1, SEC31A, TOR1AIP1
GO:0031333_negative_regulation_of_protein-containing_complex_assembly	-0.549	-0.674	0.672	0.656	ENSECAG00000013629, ENSECAG00000009190, ENSECAG00000036783, ENSECAG00000013136, ENSECAG00000015172, ENSECAG00000018005	ADD3, TMSB4X, SVIP, ADD1, SSH2, PMEPA1
GO:0006352_DNA-templated_transcription,_initiation	-0.475	-0.43	0.664	0.656	ENSECAG00000012182, ENSECAG00000008516, ENSECAG00000016769, ENSECAG00000024914, ENSECAG00000021923, ENSECAG00000020997, ENSECAG00000019486, ENSECAG00000000246, ENSECAG00000023048, ENSECAG00000005853	GTF2A2, TBP, TAF4B, GTF2B, GTF2F2, TFB1M, TBPL1, GTF2F1, TAF4, TAF5
GO:0030258_lipid_modification	-0.419	-0.467	0.656	0.656	ENSECAG00000019837, ENSECAG00000023693, ENSECAG00000013749, ENSECAG00000011752, ENSECAG00000033344, ENSECAG00000020652, ENSECAG00000008989	PIK3R1, ECI1, MBOAT1, ATG14, PIK3R3, ECHDC1, AUH
GO:0006163_purine_nucleotide_metabolic_process	-0.455	-0.63	0.632	0.656	ENSECAG00000024684, ENSECAG00000029282, ENSECAG00000023644, ENSECAG00000023269, ENSECAG00000021678, ENSECAG00000017534, ENSECAG00000012512, ENSECAG00000008959, ENSECAG00000018813, ENSECAG00000019133, ENSECAG00000009780, ENSECAG00000011722, ENSECAG00000019319, ENSECAG00000007644, ENSECAG00000025162, ENSECAG00000020948, ENSECAG00000028274, ENSECAG00000007968, ENSECAG00000021690, ENSECAG00000019618,…	ATP5F1C, UQCRQ, PPAT, GMPS, PAPSS1, HPRT1, COX6A1, SAMHD1, GUCY2C, TIGAR, UQCRB, COX4I1, NUDT4, PKM, ATP5F1E, PANK3, NDUFB6, COX5B, NDUFS6, FAR1, ACSL3, SUCLA2, ACOT9
GO:0043604_amide_biosynthetic_process	-0.597	-0.969	0.632	0.656	ENSECAG00000005798, ENSECAG00000013424, ENSECAG00000001582, ENSECAG00000000279, ENSECAG00000014964, ENSECAG00000030336, ENSECAG00000007560, ENSECAG00000015757, ENSECAG00000009146, ENSECAG00000019475, ENSECAG00000006469, ENSECAG00000010852, ENSECAG00000010157, ENSECAG00000000332, ENSECAG00000020854, ENSECAG00000023108, ENSECAG00000006587, ENSECAG00000021644, ENSECAG00000000869, ENSECAG00000024732,…	CNOT7, KARS1, CNOT6L, FARS2, MRPL39, ZAR1L, FXR1, RPL26, MRPS16, YTHDF1, EIF1AX, RPS4X, RPL15, EIF2B2, TARS1, YTHDF2, RWDD1, ZAR1, RPL26L1, EXOSC9, MRPL2, SAMD4B, SRP72, MRPL55, EIF4A1, CNOT3, SEC63, RPS2, EXOSC8, SEC61A1, CNBP, RPSA, CPEB1, RACK1, UPF3A, DCPS, EIF5, RPLP0, SGMS2, EEF1A1, ZC3H15, TNRC6B, MRPS14, LARS1, POLG2, SSB, LARP1, FARSB, UHMK1, EIF3E, DEGS1, RPS9, PAIP1, EIF2B3, FMR1, HARS…
GO:0044271_cellular_nitrogen_compound_biosynthetic_process	-0.491	-1.09	0.616	0.656	ENSECAG00000024766, ENSECAG00000005798, ENSECAG00000021000, ENSECAG00000013186, ENSECAG00000024130, ENSECAG00000022262, ENSECAG00000000648, ENSECAG00000014979, ENSECAG00000011749, ENSECAG00000013424, ENSECAG00000001582, ENSECAG00000011357, ENSECAG00000007240, ENSECAG00000024605, ENSECAG00000012780, ENSECAG00000022110, ENSECAG00000006101, ENSECAG00000005699, ENSECAG00000016520, ENSECAG00000018169,…	CREBBP, CNOT7, PAX6, WWC3, ZNF609, BRWD1, LCORL, AFAP1L2, MSX2, KARS1, CNOT6L, GATAD2B, CYLD, SIN3A, CBX3, ASXL1, ZBTB39, SERTAD3, ZHX3, RREB1, FARS2, NCOA7, BNC2, BRD4, MRPL39, ATF2, HMGB3, DRGX, HEY2, ZAR1L, BRD7, CAMTA1, GTF2A2, FXR1, EGR1, ZFHX4, AKAP13, CREB3L2, NUP35, ATP5F1C, SFPQ, HEATR1, SOHLH2, UQCRQ, RPL26, CDK7, FOXO1, MRPS16, BRWD3, YTHDF1, NOC3L, RIPK2, PCGF6, PHF1, TADA2A, NSD3, TE…
GO:0048667_cell_morphogenesis_involved_in_neuron_differentiation	-0.0841	-0.681	0.592	0.656	ENSECAG00000019993, ENSECAG00000007560, ENSECAG00000023274, ENSECAG00000009111, ENSECAG00000010553, ENSECAG00000020281, ENSECAG00000017840, ENSECAG00000022329, ENSECAG00000009523, ENSECAG00000022405, ENSECAG00000000558, ENSECAG00000000529, ENSECAG00000015935, ENSECAG00000000751, ENSECAG00000004904, ENSECAG00000032992, ENSECAG00000015935, ENSECAG00000032767, ENSECAG00000024672, ENSECAG00000022447	KALRN, FXR1, LAMA5, RUFY3, NGF, PAK2, PAK1, LRRC4C, ISL2, NOTCH1, KIF5B, MAP1S, ACTB, NEDD4L, SMO, TIAM1, ACTB, FMR1, UNK, ENAH
GO:0007080_mitotic_metaphase_plate_congression	-0.405	-0.494	0.72	0.664	ENSECAG00000009163, ENSECAG00000007955, ENSECAG00000015806, ENSECAG00000018267, ENSECAG00000008827	NUF2, HNRNPU, CCNB1, CENPC, NDC80
GO:1902532_negative_regulation_of_intracellular_signal_transduction	-0.788	-0.851	0.712	0.664	ENSECAG00000021147, ENSECAG00000024797, ENSECAG00000012915, ENSECAG00000016261, ENSECAG00000017195, ENSECAG00000014473, ENSECAG00000011461, ENSECAG00000019560, ENSECAG00000009958, ENSECAG00000009564, ENSECAG00000016986	ATM, PDE3B, KCTD13, UACA, NPRL3, SEC14L1, ARMC10, KCTD10, DUSP1, TSC1, PPM1B
GO:0051168_nuclear_export	-0.501	-0.586	0.672	0.664	ENSECAG00000024920, ENSECAG00000007602, ENSECAG00000011555, ENSECAG00000019159, ENSECAG00000010701, ENSECAG00000016010, ENSECAG00000012800, ENSECAG00000020724, ENSECAG00000022752, ENSECAG00000010431, ENSECAG00000017046, ENSECAG00000020532, ENSECAG00000021950, ENSECAG00000004492, ENSECAG00000007483, ENSECAG00000023565, ENSECAG00000024789, ENSECAG00000009694, ENSECAG00000008744, ENSECAG00000016212,…	XPO1, LTV1, THOC3, NUP85, EIF6, NUP153, NUP88, TPR, NUP214, THOC2, THOC6, RAN, NPM1, RRS1, NUP107, ENY2, RANBP3, IWS1, UHMK1, SDAD1, SARNP
GO:0006892_post-Golgi_vesicle-mediated_transport	-0.352	-0.335	0.664	0.664	ENSECAG00000015853, ENSECAG00000020655, ENSECAG00000014912, ENSECAG00000006321, ENSECAG00000011453, ENSECAG00000008168, ENSECAG00000019039, ENSECAG00000024436, ENSECAG00000009566	SORT1, GOLGA7, CCDC91, GOLPH3, CCDC93, EXOC5, CNST, ANK2, GOPC
GO:0050790_regulation_of_catalytic_activity	-0.101	-0.331	0.648	0.664	ENSECAG00000021289, ENSECAG00000019837, ENSECAG00000006638, ENSECAG00000017205, ENSECAG00000011917, ENSECAG00000017911, ENSECAG00000016020, ENSECAG00000024243, ENSECAG00000024937, ENSECAG00000020269, ENSECAG00000021238, ENSECAG00000016023, ENSECAG00000003759, ENSECAG00000020270, ENSECAG00000015322, ENSECAG00000024286, ENSECAG00000022379, ENSECAG00000024659, ENSECAG00000019369, ENSECAG00000016261,…	CCNE1, PIK3R1, CASP8AP2, CCPG1, DOCK8, PDCD10, CCNJ, GNAS, TBC1D21, XRCC4, IGF1R, CCNO, TBC1D14, CCNE2, PPP6R3, SIPA1L1, RNF34, PRRC1, CCNF, UACA, ATG14, PIK3R3, CCNB3, CCNB2, CCNI, FGFR1, ARHGAP29, TRIB2, ARHGAP12, CCNH, RALGPS2, CCNB1, CSNK2B, TBC1D8, ECT2, DTNBP1, CCNG2, MNAT1, RFFL, CAP1, SERPINE3, DCUN1D1, URI1, CAAP1, SH3BP5, TIAM1, CAST, CHN2, POT1, AIMP2, PPP1R12A, EVI5, VAV3, RAB3GAP2, C…
GO:0007399_nervous_system_development	-0.255	-0.706	0.6	0.664	ENSECAG00000017807, ENSECAG00000019993, ENSECAG00000038178, ENSECAG00000016797, ENSECAG00000007560, ENSECAG00000001445, ENSECAG00000014600, ENSECAG00000023274, ENSECAG00000006665, ENSECAG00000009003, ENSECAG00000009111, ENSECAG00000011669, ENSECAG00000017632, ENSECAG00000006613, ENSECAG00000005815, ENSECAG00000021916, ENSECAG00000028820, ENSECAG00000017235, ENSECAG00000023111, ENSECAG00000014842,…	NAV2, KALRN, HEY2, IGF2BP3, FXR1, CHD7, TRAK1, LAMA5, GPM6B, APC, RUFY3, TNN, GCM2, FBXO45, LLPH, CEP120, HEY1, MTF1, CLSTN1, TACC1, NGF, PAK2, PBX2, MANF, PAK1, SOX6, RBFOX2, LRRC4C, ISL2, MAP4K4, RTN3, NOTCH1, KIF5B, MAP1S, FRYL, ZFHX3, ACTB, NEDD4L, LSR, LDB1, CHD8, ECT2, DTNBP1, SMO, ACVR1B, TIAM1, ACTB, VAPA, FMR1, TACC3, UNK, ACSL3, ENAH, TAOK3, DPF2, PPP1R9B, LHX8, GSK3B
GO:0010562_positive_regulation_of_phosphorus_metabolic_process	-0.307	-0.92	0.56	0.664	ENSECAG00000023233, ENSECAG00000017056, ENSECAG00000007560, ENSECAG00000017911, ENSECAG00000021238, ENSECAG00000020015, ENSECAG00000015053, ENSECAG00000010553, ENSECAG00000024659, ENSECAG00000011752, ENSECAG00000015006, ENSECAG00000023795, ENSECAG00000022567, ENSECAG00000031442, ENSECAG00000021088, ENSECAG00000032767, ENSECAG00000020406	BMP15, BTBD10, FXR1, PDCD10, IGF1R, BMP6, SDCBP, NGF, PRRC1, ATG14, FGFR1, MOB1B, RACK1, FGF16, GDF9, FMR1, PPP1R12A
GO:0045937_positive_regulation_of_phosphate_metabolic_process	-0.307	-0.92	0.56	0.664	ENSECAG00000023233, ENSECAG00000017056, ENSECAG00000007560, ENSECAG00000017911, ENSECAG00000021238, ENSECAG00000020015, ENSECAG00000015053, ENSECAG00000010553, ENSECAG00000024659, ENSECAG00000011752, ENSECAG00000015006, ENSECAG00000023795, ENSECAG00000022567, ENSECAG00000031442, ENSECAG00000021088, ENSECAG00000032767, ENSECAG00000020406	BMP15, BTBD10, FXR1, PDCD10, IGF1R, BMP6, SDCBP, NGF, PRRC1, ATG14, FGFR1, MOB1B, RACK1, FGF16, GDF9, FMR1, PPP1R12A
GO:0055085_transmembrane_transport	-0.91	-0.985	0.688	0.672	ENSECAG00000024970, ENSECAG00000014112, ENSECAG00000012391, ENSECAG00000019640, ENSECAG00000024684, ENSECAG00000011409, ENSECAG00000029282, ENSECAG00000021259, ENSECAG00000006518, ENSECAG00000012027, ENSECAG00000023360, ENSECAG00000020082, ENSECAG00000000767, ENSECAG00000017105, ENSECAG00000019132, ENSECAG00000041537, ENSECAG00000013480, ENSECAG00000022060, ENSECAG00000009669, ENSECAG00000016301,…	KCNQ1, SLC20A1, ROMO1, TOMM20, ATP5F1C, TIMM44, UQCRQ, SCNN1G, SLC39A10, CACNA1E, KCNK10, KCNN2, SLC4A7, SEC62, SLMAP, FXYD6, ANO4, SLC25A32, GRPEL1, MCUB, SLC25A13, ATP1A1, ABCB7, SLC12A7, SLC25A5, SEC61A1, KCNK7, COX6A1, NEDD4L, ATP2A2, SLC7A7, UQCRB, COX4I1, SLC35G1, MICU2, SLC25A22, ATP5F1E, WNK1, PEX1, SLC38A9, NDUFB6, KCNK1, COX5B, NDUFS6, SLC39A6, ATP1B1
GO:0042273_ribosomal_large_subunit_biogenesis	-0.391	-0.317	0.68	0.672	ENSECAG00000015740, ENSECAG00000021065, ENSECAG00000015757, ENSECAG00000000361, ENSECAG00000005528, ENSECAG00000000869, ENSECAG00000010701, ENSECAG00000017121, ENSECAG00000020350, ENSECAG00000021950, ENSECAG00000001700, ENSECAG00000037716, ENSECAG00000004492, ENSECAG00000015816, ENSECAG00000000377, ENSECAG00000021891, ENSECAG00000017154, ENSECAG00000018478, ENSECAG00000023232, ENSECAG00000026813,…	DDX18, RPL5, RPL26, HEATR3, NSA2, RPL26L1, EIF6, RPF2, ZNF622, NPM1, GTPBP4, RRP15, RRS1, RPLP0, BRIX1, LAS1L, RPL10, NIFK, ZNHIT3, RPL14, SDAD1, EBNA1BP2
GO:0072521_purine-containing_compound_metabolic_process	-0.646	-0.818	0.664	0.672	ENSECAG00000024684, ENSECAG00000029282, ENSECAG00000023644, ENSECAG00000023269, ENSECAG00000021678, ENSECAG00000017534, ENSECAG00000012512, ENSECAG00000008959, ENSECAG00000018813, ENSECAG00000015690, ENSECAG00000019133, ENSECAG00000009780, ENSECAG00000011722, ENSECAG00000019319, ENSECAG00000007644, ENSECAG00000025162, ENSECAG00000020948, ENSECAG00000028274, ENSECAG00000007968, ENSECAG00000021690,…	ATP5F1C, UQCRQ, PPAT, GMPS, PAPSS1, HPRT1, COX6A1, SAMHD1, GUCY2C, SHMT1, TIGAR, UQCRB, COX4I1, NUDT4, PKM, ATP5F1E, PANK3, NDUFB6, COX5B, NDUFS6, FAR1, ACSL3, SUCLA2, ACOT9
GO:0043603_cellular_amide_metabolic_process	-0.814	-1.14	0.648	0.672	ENSECAG00000005798, ENSECAG00000013424, ENSECAG00000001582, ENSECAG00000000279, ENSECAG00000014964, ENSECAG00000030336, ENSECAG00000007560, ENSECAG00000015757, ENSECAG00000009146, ENSECAG00000019475, ENSECAG00000006469, ENSECAG00000016016, ENSECAG00000010852, ENSECAG00000010157, ENSECAG00000000332, ENSECAG00000020854, ENSECAG00000023108, ENSECAG00000006788, ENSECAG00000006587, ENSECAG00000021644,…	CNOT7, KARS1, CNOT6L, FARS2, MRPL39, ZAR1L, FXR1, RPL26, MRPS16, YTHDF1, EIF1AX, GNPDA2, RPS4X, RPL15, EIF2B2, TARS1, YTHDF2, PCSK5, RWDD1, ZAR1, RPL26L1, EXOSC9, MRPL2, PM20D2, SAMD4B, SRP72, MRPL55, FURIN, EIF4A1, CNOT3, SEC63, RPS2, GSTM3, EXOSC8, SEC61A1, CNBP, RPSA, GSTP1, CPEB1, RACK1, REN, UPF3A, DCPS, EIF5, SHMT1, RPLP0, SGMS2, TIGAR, EEF1A1, SPCS3, ZC3H15, CHAC2, TNRC6B, MRPS14, LARS1, P…
GO:0044249_cellular_biosynthetic_process	-0.604	-1.18	0.648	0.672	ENSECAG00000024766, ENSECAG00000005798, ENSECAG00000021000, ENSECAG00000013186, ENSECAG00000024130, ENSECAG00000022262, ENSECAG00000000648, ENSECAG00000014979, ENSECAG00000011749, ENSECAG00000013424, ENSECAG00000001582, ENSECAG00000011357, ENSECAG00000007240, ENSECAG00000019837, ENSECAG00000024605, ENSECAG00000012780, ENSECAG00000022110, ENSECAG00000006101, ENSECAG00000005699, ENSECAG00000016520,…	CREBBP, CNOT7, PAX6, WWC3, ZNF609, BRWD1, LCORL, AFAP1L2, MSX2, KARS1, CNOT6L, GATAD2B, CYLD, PIK3R1, SIN3A, CBX3, ASXL1, ZBTB39, SERTAD3, ZHX3, RREB1, FARS2, AGPAT1, NCOA7, BNC2, BRD4, MRPL39, ATF2, HMGB3, DRGX, HEY2, ZAR1L, BRD7, CAMTA1, GTF2A2, FXR1, GOLGA7, EGR1, ZFHX4, AKAP13, CREB3L2, NUP35, PIK3CA, STT3A, ATP5F1C, SFPQ, HEATR1, SOHLH2, UQCRQ, IP6K2, RPL26, CDK7, FOXO1, MRPS16, BRWD3, YTHDF…
GO:0010604_positive_regulation_of_macromolecule_metabolic_process	-0.43	-1.22	0.6	0.672	ENSECAG00000012810, ENSECAG00000024766, ENSECAG00000005798, ENSECAG00000011567, ENSECAG00000020286, ENSECAG00000023233, ENSECAG00000014979, ENSECAG00000001582, ENSECAG00000022110, ENSECAG00000005699, ENSECAG00000030438, ENSECAG00000006638, ENSECAG00000007560, ENSECAG00000020071, ENSECAG00000021443, ENSECAG00000014570, ENSECAG00000019475, ENSECAG00000025118, ENSECAG00000011391, ENSECAG00000006280,…	TNKS2, CREBBP, CNOT7, UIMC1, BIRC7, BMP15, AFAP1L2, CNOT6L, ASXL1, SERTAD3, BRD4, CASP8AP2, FXR1, XIAP, HEATR1, CDK7, YTHDF1, TADA2A, TET3, LPIN2, PDCD10, WBP2, RBMX, HUWE1, APC, HNRNPU, RNF111, SSBP3, SMARCA2, BIRC5, ICE2, THRA, ARIH1, LEO1, BMP6, YTHDF2, NPM2, EXOSC9, MTF1, DYRK1A, SAMD4B, SDCBP, NUP85, TCEA1, EDRF1, NGF, LMO3, PTOV1, MED10, ANGEL2, ELL, PRRC1, ISL2, UACA, CNOT3, CGAS, PTMS, NP…
GO:0016441_post-transcriptional_gene_silencing	-0.694	-0.678	0.704	0.68	ENSECAG00000011063, ENSECAG00000003869, ENSECAG00000012292, ENSECAG00000009759, ENSECAG00000010404	MOV10L1, ZC3H7A, SRRT, TNRC6B, HELZ
GO:0035194_post-transcriptional_gene_silencing_by_RNA	-0.694	-0.678	0.704	0.68	ENSECAG00000011063, ENSECAG00000003869, ENSECAG00000012292, ENSECAG00000009759, ENSECAG00000010404	MOV10L1, ZC3H7A, SRRT, TNRC6B, HELZ
GO:0042157_lipoprotein_metabolic_process	-0.733	-0.752	0.688	0.68	ENSECAG00000020655, ENSECAG00000013226, ENSECAG00000038761, ENSECAG00000013971, ENSECAG00000020790, ENSECAG00000022114, ENSECAG00000012452, ENSECAG00000011648, ENSECAG00000013216, ENSECAG00000016465	GOLGA7, ZDHHC6, ABHD17A, ATG5, ABHD17B, WIPI2, ATG12, ZDHHC5, NMT1, ZDHHC20
GO:0043066_negative_regulation_of_apoptotic_process	-0.969	-1.12	0.688	0.68	ENSECAG00000008992, ENSECAG00000020286, ENSECAG00000019545, ENSECAG00000031204, ENSECAG00000020071, ENSECAG00000008466, ENSECAG00000010553, ENSECAG00000022379, ENSECAG00000042372, ENSECAG00000011461, ENSECAG00000021240, ENSECAG00000005267, ENSECAG00000015502, ENSECAG00000012229, ENSECAG00000018209, ENSECAG00000008636	HYPK, BIRC7, BIRC6, PIM3, XIAP, BIRC5, NGF, RNF34, PTMS, ARMC10, SH3RF1, BAG3, RFFL, BIRC3, CAAP1, EYA1
GO:0042592_homeostatic_process	-0.383	-0.39	0.68	0.68	ENSECAG00000008450, ENSECAG00000023584, ENSECAG00000020528, ENSECAG00000024327, ENSECAG00000006518, ENSECAG00000012027, ENSECAG00000028645, ENSECAG00000008683, ENSECAG00000000767, ENSECAG00000040743, ENSECAG00000021238, ENSECAG00000019132, ENSECAG00000020120, ENSECAG00000016301, ENSECAG00000024623, ENSECAG00000009911, ENSECAG00000022582, ENSECAG00000007671, ENSECAG00000010675, ENSECAG00000011541,…	ATP2B1, DMXL1, TJP1, FBXL5, SLC39A10, CACNA1E, SELENOT, FTH1, SLC4A7, SELENOK, IGF1R, SLMAP, PLAA, MCUB, ATP1A1, SLC12A7, FBXW7, ATP2A2, SPATA7, PRDX2, SLC35G1, BAG3, MICU2, PRDX1, ATP6AP1, WNK1, CD320, SLC39A6, ATP1B1
GO:0051258_protein_polymerization	-0.41	-0.45	0.696	0.688	ENSECAG00000013629, ENSECAG00000009648, ENSECAG00000020822, ENSECAG00000009190, ENSECAG00000013136, ENSECAG00000019161, ENSECAG00000012734, ENSECAG00000023466, ENSECAG00000015172, ENSECAG00000008051, ENSECAG00000027735, ENSECAG00000024764, ENSECAG00000015563	ADD3, CLIP1, DIAPH1, TMSB4X, ADD1, DIAPH3, BAIAP2L1, SLAIN2, SSH2, CEP192, TUBG1, ARHGAP18, CKAP5
GO:0051090_regulation_of_DNA-binding_transcription_factor_activity	-0.494	-0.75	0.696	0.688	ENSECAG00000007240, ENSECAG00000009706, ENSECAG00000023011, ENSECAG00000008715, ENSECAG00000012960, ENSECAG00000003271, ENSECAG00000016261, ENSECAG00000003277, ENSECAG00000021091, ENSECAG00000012844, ENSECAG00000006524, ENSECAG00000016918, ENSECAG00000007129, ENSECAG00000025005, ENSECAG00000009482, ENSECAG00000016986	CYLD, AKAP13, RIPK2, TMEM9B, IRAK2, ERBIN, UACA, REL, TRAF6, TICAM2, FANK1, TMED4, LRP6, BCL10, PPRC1, PPM1B
GO:0045732_positive_regulation_of_protein_catabolic_process	-0.525	-0.699	0.68	0.688	ENSECAG00000021385, ENSECAG00000009003, ENSECAG00000019466, ENSECAG00000010405, ENSECAG00000021240, ENSECAG00000037302, ENSECAG00000019705	HUWE1, APC, ARIH1, TRIB2, SH3RF1, OAZ1, CDC20
GO:0051171_regulation_of_nitrogen_compound_metabolic_process	-0.466	-1.19	0.68	0.688	ENSECAG00000021289, ENSECAG00000012810, ENSECAG00000024766, ENSECAG00000005798, ENSECAG00000011567, ENSECAG00000021000, ENSECAG00000013186, ENSECAG00000024130, ENSECAG00000022262, ENSECAG00000020286, ENSECAG00000023233, ENSECAG00000000648, ENSECAG00000014979, ENSECAG00000011749, ENSECAG00000001582, ENSECAG00000010827, ENSECAG00000011357, ENSECAG00000007240, ENSECAG00000024605, ENSECAG00000012780,…	CCNE1, TNKS2, CREBBP, CNOT7, UIMC1, PAX6, WWC3, ZNF609, BRWD1, BIRC7, BMP15, LCORL, AFAP1L2, MSX2, CNOT6L, TEX15, GATAD2B, CYLD, SIN3A, CBX3, UFL1, NEDD8, ASXL1, ZBTB39, SERTAD3, ZHX3, MATR3, RREB1, NCOA7, BNC2, BRD4, SRRM1, CASP8AP2, ATF2, HMGB3, DPPA3, DRGX, HEY2, BRD7, CAMTA1, FXR1, EGR1, ZFHX4, AKAP13, CREB3L2, NUP35, XIAP, SFPQ, HEATR1, SOHLH2, CDK7, FOXO1, BRWD3, YTHDF1, RIPK2, PCGF6, PHF1,…
GO:0014070_response_to_organic_cyclic_compound	-0.374	-0.53	0.672	0.688	ENSECAG00000024243, ENSECAG00000019809, ENSECAG00000012844, ENSECAG00000016434, ENSECAG00000024814	GNAS, CGAS, TICAM2, RAP1A, SRARP
GO:0010647_positive_regulation_of_cell_communication	-0.589	-0.904	0.672	0.688	ENSECAG00000012810, ENSECAG00000023233, ENSECAG00000014979, ENSECAG00000007240, ENSECAG00000008013, ENSECAG00000013569, ENSECAG00000024272, ENSECAG00000009706, ENSECAG00000005374, ENSECAG00000006518, ENSECAG00000023011, ENSECAG00000017911, ENSECAG00000015363, ENSECAG00000014371, ENSECAG00000024602, ENSECAG00000021238, ENSECAG00000020015, ENSECAG00000007654, ENSECAG00000023111, ENSECAG00000015053,…	TNKS2, BMP15, AFAP1L2, CYLD, NMB, LAMTOR3, RIMS1, AKAP13, WAC, SLC39A10, RIPK2, PDCD10, KLHL22, CSNK1G2, RNF111, IGF1R, BMP6, KLHDC10, CLSTN1, SDCBP, RRAGA, TMEM9B, LAMTOR5, TRAF6, TICAM2, CSNK1G3, TMED4, SH3RF1, LAMTOR1, SRARP, SMO, GDF9, CAPRIN2, BCL10, LAMTOR4, PPM1B, NET1
GO:0023056_positive_regulation_of_signaling	-0.589	-0.904	0.672	0.688	ENSECAG00000012810, ENSECAG00000023233, ENSECAG00000014979, ENSECAG00000007240, ENSECAG00000008013, ENSECAG00000013569, ENSECAG00000024272, ENSECAG00000009706, ENSECAG00000005374, ENSECAG00000006518, ENSECAG00000023011, ENSECAG00000017911, ENSECAG00000015363, ENSECAG00000014371, ENSECAG00000024602, ENSECAG00000021238, ENSECAG00000020015, ENSECAG00000007654, ENSECAG00000023111, ENSECAG00000015053,…	TNKS2, BMP15, AFAP1L2, CYLD, NMB, LAMTOR3, RIMS1, AKAP13, WAC, SLC39A10, RIPK2, PDCD10, KLHL22, CSNK1G2, RNF111, IGF1R, BMP6, KLHDC10, CLSTN1, SDCBP, RRAGA, TMEM9B, LAMTOR5, TRAF6, TICAM2, CSNK1G3, TMED4, SH3RF1, LAMTOR1, SRARP, SMO, GDF9, CAPRIN2, BCL10, LAMTOR4, PPM1B, NET1
GO:0009653_anatomical_structure_morphogenesis	-0.538	-0.949	0.672	0.688	ENSECAG00000022262, ENSECAG00000011749, ENSECAG00000019993, ENSECAG00000022110, ENSECAG00000018333, ENSECAG00000007560, ENSECAG00000001445, ENSECAG00000007187, ENSECAG00000023274, ENSECAG00000021002, ENSECAG00000013706, ENSECAG00000009111, ENSECAG00000011669, ENSECAG00000008303, ENSECAG00000007687, ENSECAG00000004842, ENSECAG00000005815, ENSECAG00000012900, ENSECAG00000011111, ENSECAG00000022649,…	BRWD1, MSX2, KALRN, ASXL1, EZR, FXR1, CHD7, BRWD3, LAMA5, ROCK1, SMAD6, RUFY3, TNN, LAMB1, PTPN14, CDH10, LLPH, MSN, FMNL2, SMAD1, NGF, PAK2, PBX2, PAK1, SMAD2, MSX1, MFF, LRRC4C, ISL2, LMOD3, MAP4K4, SMAD3, SMAD5, NOTCH1, KIF5B, MAP1S, FRYL, ACTB, PKNOX1, NEDD4L, FGF16, LGALS12, FHOD3, PDCL3, SMO, CDH3, CAP1, HOXA9, DUSP1, LRP6, TIAM1, ACTB, FMR1, ANKRD11, CSRP2, VANGL1, UNK, RDX, ENAH, TAOK3, A…
GO:0080090_regulation_of_primary_metabolic_process	-0.367	-1.1	0.648	0.688	ENSECAG00000021289, ENSECAG00000012810, ENSECAG00000024766, ENSECAG00000005798, ENSECAG00000011567, ENSECAG00000021000, ENSECAG00000013186, ENSECAG00000024130, ENSECAG00000022262, ENSECAG00000020286, ENSECAG00000023233, ENSECAG00000000648, ENSECAG00000014979, ENSECAG00000011749, ENSECAG00000001582, ENSECAG00000010827, ENSECAG00000011357, ENSECAG00000007240, ENSECAG00000024605, ENSECAG00000012780,…	CCNE1, TNKS2, CREBBP, CNOT7, UIMC1, PAX6, WWC3, ZNF609, BRWD1, BIRC7, BMP15, LCORL, AFAP1L2, MSX2, CNOT6L, TEX15, GATAD2B, CYLD, SIN3A, CBX3, UFL1, NEDD8, ASXL1, ZBTB39, SERTAD3, ZHX3, MATR3, RREB1, NCOA7, BNC2, BRD4, SRRM1, CASP8AP2, ATF2, HMGB3, DPPA3, DRGX, HEY2, BRD7, CAMTA1, FXR1, EGR1, ZFHX4, AKAP13, CREB3L2, NUP35, XIAP, SFPQ, HEATR1, SOHLH2, CDK7, FOXO1, BRWD3, YTHDF1, RIPK2, PCGF6, PHF1,…
GO:0050684_regulation_of_mRNA_processing	-0.285	-0.673	0.632	0.688	ENSECAG00000026981, ENSECAG00000007560, ENSECAG00000021380, ENSECAG00000007955, ENSECAG00000010194, ENSECAG00000008833, ENSECAG00000017504, ENSECAG00000018923, ENSECAG00000003471, ENSECAG00000019346, ENSECAG00000023962, ENSECAG00000018303, ENSECAG00000006649, ENSECAG00000007741, ENSECAG00000032767, ENSECAG00000014213, ENSECAG00000010375, ENSECAG00000024737, ENSECAG00000021868	SRRM1, FXR1, RBMX, HNRNPU, KHDRBS3, SPEN, QKI, RBFOX2, WTAP, KHDRBS1, SF3A1, YTHDC1, CELF2, CELF1, FMR1, SRPK1, SRPK2, SF3B4, NCL
GO:0040007_growth	-0.747	-0.807	0.736	0.696	ENSECAG00000013186, ENSECAG00000014820, ENSECAG00000011669, ENSECAG00000014081, ENSECAG00000005815, ENSECAG00000010553, ENSECAG00000017226	WWC3, DSP, TNN, WWC1, LLPH, NGF, WWC2
GO:0048589_developmental_growth	-0.747	-0.807	0.736	0.696	ENSECAG00000013186, ENSECAG00000014820, ENSECAG00000011669, ENSECAG00000014081, ENSECAG00000005815, ENSECAG00000010553, ENSECAG00000017226	WWC3, DSP, TNN, WWC1, LLPH, NGF, WWC2
GO:0043434_response_to_peptide_hormone	-0.592	-0.757	0.712	0.696	ENSECAG00000019837, ENSECAG00000016551, ENSECAG00000006280, ENSECAG00000016346, ENSECAG00000033344, ENSECAG00000007644, ENSECAG00000024935	PIK3R1, RAB13, LPIN2, LEPROT, PIK3R3, PKM, GSK3B
GO:0071375_cellular_response_to_peptide_hormone_stimulus	-0.592	-0.757	0.712	0.696	ENSECAG00000019837, ENSECAG00000016551, ENSECAG00000006280, ENSECAG00000016346, ENSECAG00000033344, ENSECAG00000007644, ENSECAG00000024935	PIK3R1, RAB13, LPIN2, LEPROT, PIK3R3, PKM, GSK3B
GO:1901652_response_to_peptide	-0.592	-0.757	0.712	0.696	ENSECAG00000019837, ENSECAG00000016551, ENSECAG00000006280, ENSECAG00000016346, ENSECAG00000033344, ENSECAG00000007644, ENSECAG00000024935	PIK3R1, RAB13, LPIN2, LEPROT, PIK3R3, PKM, GSK3B
GO:1901653_cellular_response_to_peptide	-0.592	-0.757	0.712	0.696	ENSECAG00000019837, ENSECAG00000016551, ENSECAG00000006280, ENSECAG00000016346, ENSECAG00000033344, ENSECAG00000007644, ENSECAG00000024935	PIK3R1, RAB13, LPIN2, LEPROT, PIK3R3, PKM, GSK3B
GO:0051345_positive_regulation_of_hydrolase_activity	-0.353	-0.373	0.704	0.696	ENSECAG00000006638, ENSECAG00000011917, ENSECAG00000024937, ENSECAG00000003759, ENSECAG00000024286, ENSECAG00000016261, ENSECAG00000009393, ENSECAG00000006011, ENSECAG00000012024, ENSECAG00000014059, ENSECAG00000032992, ENSECAG00000020406, ENSECAG00000023646	CASP8AP2, DOCK8, TBC1D21, TBC1D14, SIPA1L1, UACA, ARHGAP29, RALGPS2, TBC1D8, ECT2, TIAM1, PPP1R12A, EVI5
GO:0043123_positive_regulation_of_I-kappaB_kinase/NF-kappaB_signaling	-0.467	-0.668	0.672	0.696	ENSECAG00000009706, ENSECAG00000023011, ENSECAG00000008715, ENSECAG00000012844, ENSECAG00000016918, ENSECAG00000016986	AKAP13, RIPK2, TMEM9B, TICAM2, TMED4, PPM1B
GO:0031325_positive_regulation_of_cellular_metabolic_process	-0.51	-1.29	0.648	0.696	ENSECAG00000012810, ENSECAG00000024766, ENSECAG00000005798, ENSECAG00000011567, ENSECAG00000020286, ENSECAG00000023233, ENSECAG00000017056, ENSECAG00000014979, ENSECAG00000001582, ENSECAG00000022110, ENSECAG00000005699, ENSECAG00000030438, ENSECAG00000006638, ENSECAG00000007560, ENSECAG00000020071, ENSECAG00000021443, ENSECAG00000014570, ENSECAG00000019475, ENSECAG00000025118, ENSECAG00000011391,…	TNKS2, CREBBP, CNOT7, UIMC1, BIRC7, BMP15, BTBD10, AFAP1L2, CNOT6L, ASXL1, SERTAD3, BRD4, CASP8AP2, FXR1, XIAP, HEATR1, CDK7, YTHDF1, TADA2A, TET3, LPIN2, PDCD10, WBP2, RBMX, HNRNPU, RNF111, IGF1R, SSBP3, SMARCA2, BIRC5, ICE2, THRA, ARIH1, LEO1, BMP6, YTHDF2, NPM2, EXOSC9, MTF1, DYRK1A, SAMD4B, SDCBP, NUP85, TCEA1, EDRF1, NGF, LMO3, PTOV1, MED10, ELL, PRRC1, ISL2, UACA, CNOT3, ATG14, PTMS, NPRL3,…
GO:0000470_maturation_of_LSU-rRNA	-0.454	-0.388	0.744	0.704	ENSECAG00000015740, ENSECAG00000005528, ENSECAG00000010701, ENSECAG00000017121, ENSECAG00000037716, ENSECAG00000021891, ENSECAG00000018478, ENSECAG00000023232	DDX18, NSA2, EIF6, RPF2, RRP15, LAS1L, NIFK, ZNHIT3
GO:0051056_regulation_of_small_GTPase_mediated_signal_transduction	-0.604	-0.61	0.728	0.704	ENSECAG00000017234, ENSECAG00000009706, ENSECAG00000012915, ENSECAG00000017689, ENSECAG00000014922, ENSECAG00000019560, ENSECAG00000024764, ENSECAG00000021234	ARHGAP17, AKAP13, KCTD13, ARHGEF28, EPS8, KCTD10, ARHGAP18, NET1
GO:0030865_cortical_cytoskeleton_organization	-0.852	-0.889	0.72	0.704	ENSECAG00000021002, ENSECAG00000011111, ENSECAG00000021186, ENSECAG00000015352, ENSECAG00000008614	ROCK1, FMNL2, FHOD3, PPP2R3C, LLGL2
GO:0051051_negative_regulation_of_transport	-0.823	-0.89	0.72	0.704	ENSECAG00000016434, ENSECAG00000000751, ENSECAG00000036783, ENSECAG00000023501, ENSECAG00000009566	RAP1A, NEDD4L, SVIP, WNK1, GOPC
GO:0035023_regulation_of_Rho_protein_signal_transduction	-0.505	-0.51	0.712	0.704	ENSECAG00000009706, ENSECAG00000012915, ENSECAG00000017689, ENSECAG00000014922, ENSECAG00000019560, ENSECAG00000021234	AKAP13, KCTD13, ARHGEF28, EPS8, KCTD10, NET1
GO:0050801_ion_homeostasis	-0.427	-0.455	0.696	0.704	ENSECAG00000008450, ENSECAG00000023584, ENSECAG00000024327, ENSECAG00000006518, ENSECAG00000012027, ENSECAG00000008683, ENSECAG00000000767, ENSECAG00000040743, ENSECAG00000019132, ENSECAG00000016301, ENSECAG00000024623, ENSECAG00000009911, ENSECAG00000007671, ENSECAG00000024593, ENSECAG00000016494, ENSECAG00000014216, ENSECAG00000023501, ENSECAG00000008456, ENSECAG00000017771	ATP2B1, DMXL1, FBXL5, SLC39A10, CACNA1E, FTH1, SLC4A7, SELENOK, SLMAP, MCUB, ATP1A1, SLC12A7, ATP2A2, SLC35G1, MICU2, ATP6AP1, WNK1, SLC39A6, ATP1B1
GO:0048584_positive_regulation_of_response_to_stimulus	-0.329	-0.921	0.68	0.704	ENSECAG00000012810, ENSECAG00000011567, ENSECAG00000023233, ENSECAG00000014979, ENSECAG00000007240, ENSECAG00000013569, ENSECAG00000007560, ENSECAG00000009706, ENSECAG00000005374, ENSECAG00000006518, ENSECAG00000023011, ENSECAG00000017911, ENSECAG00000015363, ENSECAG00000014371, ENSECAG00000024602, ENSECAG00000021238, ENSECAG00000020015, ENSECAG00000007654, ENSECAG00000015053, ENSECAG00000005729,…	TNKS2, UIMC1, BMP15, AFAP1L2, CYLD, LAMTOR3, FXR1, AKAP13, WAC, SLC39A10, RIPK2, PDCD10, KLHL22, CSNK1G2, RNF111, IGF1R, BMP6, KLHDC10, SDCBP, RRAGA, TMEM9B, SH2B2, CGAS, LAMTOR5, TRAF6, TICAM2, CSNK1G3, AKIRIN2, FGF16, TMED4, TIGAR, SH3RF1, LAMTOR1, SRARP, SMO, GDF9, CAPRIN2, BCL10, FMR1, LAMTOR4, EYA1, PPM1B, NET1
GO:0009058_biosynthetic_process	-0.603	-1.18	0.672	0.704	ENSECAG00000024766, ENSECAG00000005798, ENSECAG00000021000, ENSECAG00000013186, ENSECAG00000024130, ENSECAG00000022262, ENSECAG00000000648, ENSECAG00000014979, ENSECAG00000011749, ENSECAG00000013424, ENSECAG00000001582, ENSECAG00000011357, ENSECAG00000007240, ENSECAG00000019837, ENSECAG00000024605, ENSECAG00000012780, ENSECAG00000022110, ENSECAG00000006101, ENSECAG00000005699, ENSECAG00000016520,…	CREBBP, CNOT7, PAX6, WWC3, ZNF609, BRWD1, LCORL, AFAP1L2, MSX2, KARS1, CNOT6L, GATAD2B, CYLD, PIK3R1, SIN3A, CBX3, ASXL1, ZBTB39, SERTAD3, ZHX3, RREB1, FARS2, AGPAT1, NCOA7, BNC2, BRD4, MRPL39, ATF2, HMGB3, DRGX, HEY2, ZAR1L, BRD7, CAMTA1, GTF2A2, FXR1, GOLGA7, EGR1, ZFHX4, AKAP13, CREB3L2, NUP35, PIK3CA, STT3A, ATP5F1C, SFPQ, HEATR1, SOHLH2, UQCRQ, TFDP2, IP6K2, RPL26, CDK7, FOXO1, MRPS16, BRWD3…
GO:1901576_organic_substance_biosynthetic_process	-0.603	-1.18	0.672	0.704	ENSECAG00000024766, ENSECAG00000005798, ENSECAG00000021000, ENSECAG00000013186, ENSECAG00000024130, ENSECAG00000022262, ENSECAG00000000648, ENSECAG00000014979, ENSECAG00000011749, ENSECAG00000013424, ENSECAG00000001582, ENSECAG00000011357, ENSECAG00000007240, ENSECAG00000019837, ENSECAG00000024605, ENSECAG00000012780, ENSECAG00000022110, ENSECAG00000006101, ENSECAG00000005699, ENSECAG00000016520,…	CREBBP, CNOT7, PAX6, WWC3, ZNF609, BRWD1, LCORL, AFAP1L2, MSX2, KARS1, CNOT6L, GATAD2B, CYLD, PIK3R1, SIN3A, CBX3, ASXL1, ZBTB39, SERTAD3, ZHX3, RREB1, FARS2, AGPAT1, NCOA7, BNC2, BRD4, MRPL39, ATF2, HMGB3, DRGX, HEY2, ZAR1L, BRD7, CAMTA1, GTF2A2, FXR1, GOLGA7, EGR1, ZFHX4, AKAP13, CREB3L2, NUP35, PIK3CA, STT3A, ATP5F1C, SFPQ, HEATR1, SOHLH2, UQCRQ, TFDP2, IP6K2, RPL26, CDK7, FOXO1, MRPS16, BRWD3…
GO:0006401_RNA_catabolic_process	-0.625	-1.27	0.656	0.704	ENSECAG00000005798, ENSECAG00000001582, ENSECAG00000018988, ENSECAG00000017022, ENSECAG00000010812, ENSECAG00000007560, ENSECAG00000019475, ENSECAG00000025040, ENSECAG00000007955, ENSECAG00000023108, ENSECAG00000013162, ENSECAG00000024732, ENSECAG00000015551, ENSECAG00000010723, ENSECAG00000013090, ENSECAG00000023181, ENSECAG00000012606, ENSECAG00000017141, ENSECAG00000012464, ENSECAG00000012956,…	CNOT7, CNOT6L, XRN2, UPF2, EDC4, FXR1, YTHDF1, ZCCHC17, HNRNPU, YTHDF2, PCNA, EXOSC9, SAMD4B, ANGEL2, POLA1, CNOT3, EXOSC8, UPF3A, SYNCRIP, DCPS, TNRC6B, FMR1, FASTKD2, SMG7, UPF3B
GO:0010628_positive_regulation_of_gene_expression	-0.131	-0.742	0.616	0.704	ENSECAG00000014979, ENSECAG00000007560, ENSECAG00000021380, ENSECAG00000007955, ENSECAG00000010723, ENSECAG00000019809, ENSECAG00000014473, ENSECAG00000009512, ENSECAG00000012844, ENSECAG00000017141, ENSECAG00000012464, ENSECAG00000031442, ENSECAG00000015752, ENSECAG00000018495, ENSECAG00000015732, ENSECAG00000017002, ENSECAG00000008744, ENSECAG00000020316, ENSECAG00000032767, ENSECAG00000024737,…	AFAP1L2, FXR1, RBMX, HNRNPU, ANGEL2, CGAS, SEC14L1, CNBP, TICAM2, UPF3A, SYNCRIP, FGF16, PDCL3, SSB, IL37, LARP1, UHMK1, RPS9, FMR1, SF3B4, LARP1B, NCL, UPF3B
GO:0007043_cell-cell_junction_assembly	-0.987	-0.981	0.736	0.712	ENSECAG00000004842, ENSECAG00000014290, ENSECAG00000022420, ENSECAG00000009528, ENSECAG00000009118	CDH10, PKP4, LSR, CDH3, OCLN
GO:0051252_regulation_of_RNA_metabolic_process	-0.562	-1.17	0.704	0.712	ENSECAG00000024766, ENSECAG00000005798, ENSECAG00000021000, ENSECAG00000013186, ENSECAG00000024130, ENSECAG00000022262, ENSECAG00000000648, ENSECAG00000014979, ENSECAG00000011749, ENSECAG00000001582, ENSECAG00000011357, ENSECAG00000007240, ENSECAG00000024605, ENSECAG00000012780, ENSECAG00000022110, ENSECAG00000006101, ENSECAG00000005699, ENSECAG00000016520, ENSECAG00000012882, ENSECAG00000018169,…	CREBBP, CNOT7, PAX6, WWC3, ZNF609, BRWD1, LCORL, AFAP1L2, MSX2, CNOT6L, GATAD2B, CYLD, SIN3A, CBX3, ASXL1, ZBTB39, SERTAD3, ZHX3, MATR3, RREB1, NCOA7, BNC2, BRD4, SRRM1, ATF2, HMGB3, DRGX, HEY2, BRD7, CAMTA1, FXR1, EGR1, ZFHX4, AKAP13, CREB3L2, NUP35, SFPQ, HEATR1, SOHLH2, CDK7, FOXO1, BRWD3, YTHDF1, RIPK2, PCGF6, PHF1, TADA2A, NSD3, TET3, ELK3, HNRNPL, LPIN2, ARID4A, TRPS1, ZCCHC17, WBP2, RBMX, …
GO:0006412_translation	-0.66	-1.04	0.672	0.712	ENSECAG00000005798, ENSECAG00000013424, ENSECAG00000001582, ENSECAG00000000279, ENSECAG00000014964, ENSECAG00000030336, ENSECAG00000007560, ENSECAG00000015757, ENSECAG00000009146, ENSECAG00000019475, ENSECAG00000006469, ENSECAG00000010852, ENSECAG00000010157, ENSECAG00000000332, ENSECAG00000020854, ENSECAG00000023108, ENSECAG00000006587, ENSECAG00000021644, ENSECAG00000000869, ENSECAG00000024732,…	CNOT7, KARS1, CNOT6L, FARS2, MRPL39, ZAR1L, FXR1, RPL26, MRPS16, YTHDF1, EIF1AX, RPS4X, RPL15, EIF2B2, TARS1, YTHDF2, RWDD1, ZAR1, RPL26L1, EXOSC9, MRPL2, SAMD4B, SRP72, MRPL55, EIF4A1, CNOT3, SEC63, RPS2, EXOSC8, SEC61A1, CNBP, RPSA, CPEB1, RACK1, UPF3A, DCPS, EIF5, RPLP0, EEF1A1, ZC3H15, TNRC6B, MRPS14, LARS1, POLG2, SSB, LARP1, FARSB, UHMK1, EIF3E, RPS9, PAIP1, EIF2B3, FMR1, HARS1, GSPT1, EIF3…
GO:0006414_translational_elongation	-0.66	-1.04	0.672	0.712	ENSECAG00000005798, ENSECAG00000013424, ENSECAG00000001582, ENSECAG00000000279, ENSECAG00000014964, ENSECAG00000030336, ENSECAG00000007560, ENSECAG00000015757, ENSECAG00000009146, ENSECAG00000019475, ENSECAG00000006469, ENSECAG00000010852, ENSECAG00000010157, ENSECAG00000000332, ENSECAG00000020854, ENSECAG00000023108, ENSECAG00000006587, ENSECAG00000021644, ENSECAG00000000869, ENSECAG00000024732,…	CNOT7, KARS1, CNOT6L, FARS2, MRPL39, ZAR1L, FXR1, RPL26, MRPS16, YTHDF1, EIF1AX, RPS4X, RPL15, EIF2B2, TARS1, YTHDF2, RWDD1, ZAR1, RPL26L1, EXOSC9, MRPL2, SAMD4B, SRP72, MRPL55, EIF4A1, CNOT3, SEC63, RPS2, EXOSC8, SEC61A1, CNBP, RPSA, CPEB1, RACK1, UPF3A, DCPS, EIF5, RPLP0, EEF1A1, ZC3H15, TNRC6B, MRPS14, LARS1, POLG2, SSB, LARP1, FARSB, UHMK1, EIF3E, RPS9, PAIP1, EIF2B3, FMR1, HARS1, GSPT1, EIF3…
GO:0043043_peptide_biosynthetic_process	-0.66	-1.04	0.672	0.712	ENSECAG00000005798, ENSECAG00000013424, ENSECAG00000001582, ENSECAG00000000279, ENSECAG00000014964, ENSECAG00000030336, ENSECAG00000007560, ENSECAG00000015757, ENSECAG00000009146, ENSECAG00000019475, ENSECAG00000006469, ENSECAG00000010852, ENSECAG00000010157, ENSECAG00000000332, ENSECAG00000020854, ENSECAG00000023108, ENSECAG00000006587, ENSECAG00000021644, ENSECAG00000000869, ENSECAG00000024732,…	CNOT7, KARS1, CNOT6L, FARS2, MRPL39, ZAR1L, FXR1, RPL26, MRPS16, YTHDF1, EIF1AX, RPS4X, RPL15, EIF2B2, TARS1, YTHDF2, RWDD1, ZAR1, RPL26L1, EXOSC9, MRPL2, SAMD4B, SRP72, MRPL55, EIF4A1, CNOT3, SEC63, RPS2, EXOSC8, SEC61A1, CNBP, RPSA, CPEB1, RACK1, UPF3A, DCPS, EIF5, RPLP0, EEF1A1, ZC3H15, TNRC6B, MRPS14, LARS1, POLG2, SSB, LARP1, FARSB, UHMK1, EIF3E, RPS9, PAIP1, EIF2B3, FMR1, HARS1, GSPT1, EIF3…
GO:0019222_regulation_of_metabolic_process	-0.467	-1.14	0.672	0.712	ENSECAG00000021289, ENSECAG00000012810, ENSECAG00000024766, ENSECAG00000005798, ENSECAG00000011567, ENSECAG00000021000, ENSECAG00000013186, ENSECAG00000024130, ENSECAG00000022262, ENSECAG00000020286, ENSECAG00000023233, ENSECAG00000000648, ENSECAG00000017056, ENSECAG00000014979, ENSECAG00000011749, ENSECAG00000001582, ENSECAG00000010827, ENSECAG00000011357, ENSECAG00000007240, ENSECAG00000018988,…	CCNE1, TNKS2, CREBBP, CNOT7, UIMC1, PAX6, WWC3, ZNF609, BRWD1, BIRC7, BMP15, LCORL, BTBD10, AFAP1L2, MSX2, CNOT6L, TEX15, GATAD2B, CYLD, XRN2, PIK3R1, SIN3A, CBX3, UFL1, NEDD8, ASXL1, UPF2, ZBTB39, SERTAD3, ZHX3, MATR3, RREB1, NCOA7, MOV10L1, BNC2, BRD4, SRRM1, CASP8AP2, ATF2, HMGB3, DPPA3, DRGX, HEY2, IGF2BP3, BRD7, YBX1, EDC4, CAMTA1, FXR1, EGR1, ZFHX4, AKAP13, CHD7, CREB3L2, NUP35, AFF1, WAC, …
GO:0045132_meiotic_chromosome_segregation	-0.696	-0.821	0.736	0.72	ENSECAG00000010827, ENSECAG00000016913, ENSECAG00000009163, ENSECAG00000017824, ENSECAG00000016392, ENSECAG00000021452, ENSECAG00000022722, ENSECAG00000018267, ENSECAG00000023776, ENSECAG00000013053, ENSECAG00000017103	TEX15, MEIKIN, NUF2, TERB1, RAD21, BUB1B, ESPL1, CENPC, TTK, TOP2A, BUB1
GO:0006518_peptide_metabolic_process	-0.712	-1.04	0.704	0.72	ENSECAG00000005798, ENSECAG00000013424, ENSECAG00000001582, ENSECAG00000000279, ENSECAG00000014964, ENSECAG00000030336, ENSECAG00000007560, ENSECAG00000015757, ENSECAG00000009146, ENSECAG00000019475, ENSECAG00000006469, ENSECAG00000010852, ENSECAG00000010157, ENSECAG00000000332, ENSECAG00000020854, ENSECAG00000023108, ENSECAG00000006788, ENSECAG00000006587, ENSECAG00000021644, ENSECAG00000000869,…	CNOT7, KARS1, CNOT6L, FARS2, MRPL39, ZAR1L, FXR1, RPL26, MRPS16, YTHDF1, EIF1AX, RPS4X, RPL15, EIF2B2, TARS1, YTHDF2, PCSK5, RWDD1, ZAR1, RPL26L1, EXOSC9, MRPL2, SAMD4B, SRP72, MRPL55, FURIN, EIF4A1, CNOT3, SEC63, RPS2, GSTM3, EXOSC8, SEC61A1, CNBP, RPSA, GSTP1, CPEB1, RACK1, REN, UPF3A, DCPS, EIF5, RPLP0, EEF1A1, SPCS3, ZC3H15, CHAC2, TNRC6B, MRPS14, LARS1, POLG2, SSB, NPEPPS, LARP1, FARSB, UHMK…
GO:0019439_aromatic_compound_catabolic_process	-0.632	-1.23	0.648	0.72	ENSECAG00000005798, ENSECAG00000001582, ENSECAG00000018988, ENSECAG00000017022, ENSECAG00000010812, ENSECAG00000007560, ENSECAG00000019475, ENSECAG00000025040, ENSECAG00000007955, ENSECAG00000023108, ENSECAG00000013162, ENSECAG00000024732, ENSECAG00000020890, ENSECAG00000015551, ENSECAG00000010723, ENSECAG00000013090, ENSECAG00000023181, ENSECAG00000012606, ENSECAG00000008959, ENSECAG00000017141,…	CNOT7, CNOT6L, XRN2, UPF2, EDC4, FXR1, YTHDF1, ZCCHC17, HNRNPU, YTHDF2, PCNA, EXOSC9, PM20D2, SAMD4B, ANGEL2, POLA1, CNOT3, EXOSC8, SAMHD1, UPF3A, SYNCRIP, DCPS, TNRC6B, NUDT4, FMR1, FASTKD2, SMG7, UPF3B
GO:0044270_cellular_nitrogen_compound_catabolic_process	-0.632	-1.23	0.648	0.72	ENSECAG00000005798, ENSECAG00000001582, ENSECAG00000018988, ENSECAG00000017022, ENSECAG00000010812, ENSECAG00000007560, ENSECAG00000019475, ENSECAG00000025040, ENSECAG00000007955, ENSECAG00000023108, ENSECAG00000013162, ENSECAG00000024732, ENSECAG00000020890, ENSECAG00000015551, ENSECAG00000010723, ENSECAG00000013090, ENSECAG00000023181, ENSECAG00000012606, ENSECAG00000008959, ENSECAG00000017141,…	CNOT7, CNOT6L, XRN2, UPF2, EDC4, FXR1, YTHDF1, ZCCHC17, HNRNPU, YTHDF2, PCNA, EXOSC9, PM20D2, SAMD4B, ANGEL2, POLA1, CNOT3, EXOSC8, SAMHD1, UPF3A, SYNCRIP, DCPS, TNRC6B, NUDT4, FMR1, FASTKD2, SMG7, UPF3B
GO:0046700_heterocycle_catabolic_process	-0.632	-1.23	0.648	0.72	ENSECAG00000005798, ENSECAG00000001582, ENSECAG00000018988, ENSECAG00000017022, ENSECAG00000010812, ENSECAG00000007560, ENSECAG00000019475, ENSECAG00000025040, ENSECAG00000007955, ENSECAG00000023108, ENSECAG00000013162, ENSECAG00000024732, ENSECAG00000020890, ENSECAG00000015551, ENSECAG00000010723, ENSECAG00000013090, ENSECAG00000023181, ENSECAG00000012606, ENSECAG00000008959, ENSECAG00000017141,…	CNOT7, CNOT6L, XRN2, UPF2, EDC4, FXR1, YTHDF1, ZCCHC17, HNRNPU, YTHDF2, PCNA, EXOSC9, PM20D2, SAMD4B, ANGEL2, POLA1, CNOT3, EXOSC8, SAMHD1, UPF3A, SYNCRIP, DCPS, TNRC6B, NUDT4, FMR1, FASTKD2, SMG7, UPF3B
GO:1901361_organic_cyclic_compound_catabolic_process	-0.632	-1.23	0.648	0.72	ENSECAG00000005798, ENSECAG00000001582, ENSECAG00000018988, ENSECAG00000017022, ENSECAG00000010812, ENSECAG00000007560, ENSECAG00000019475, ENSECAG00000025040, ENSECAG00000007955, ENSECAG00000023108, ENSECAG00000013162, ENSECAG00000024732, ENSECAG00000020890, ENSECAG00000015551, ENSECAG00000010723, ENSECAG00000013090, ENSECAG00000023181, ENSECAG00000012606, ENSECAG00000008959, ENSECAG00000017141,…	CNOT7, CNOT6L, XRN2, UPF2, EDC4, FXR1, YTHDF1, ZCCHC17, HNRNPU, YTHDF2, PCNA, EXOSC9, PM20D2, SAMD4B, ANGEL2, POLA1, CNOT3, EXOSC8, SAMHD1, UPF3A, SYNCRIP, DCPS, TNRC6B, NUDT4, FMR1, FASTKD2, SMG7, UPF3B
GO:0048878_chemical_homeostasis	-0.482	-0.523	0.728	0.728	ENSECAG00000008450, ENSECAG00000023584, ENSECAG00000024327, ENSECAG00000006518, ENSECAG00000012027, ENSECAG00000008683, ENSECAG00000000767, ENSECAG00000040743, ENSECAG00000021238, ENSECAG00000019132, ENSECAG00000016301, ENSECAG00000024623, ENSECAG00000009911, ENSECAG00000007671, ENSECAG00000024593, ENSECAG00000016494, ENSECAG00000014216, ENSECAG00000023501, ENSECAG00000013583, ENSECAG00000008456,…	ATP2B1, DMXL1, FBXL5, SLC39A10, CACNA1E, FTH1, SLC4A7, SELENOK, IGF1R, SLMAP, MCUB, ATP1A1, SLC12A7, ATP2A2, SLC35G1, MICU2, ATP6AP1, WNK1, CD320, SLC39A6, ATP1B1
GO:0045017_glycerolipid_biosynthetic_process	-0.876	-0.933	0.728	0.728	ENSECAG00000019837, ENSECAG00000014481, ENSECAG00000015019, ENSECAG00000006875, ENSECAG00000006280, ENSECAG00000021699, ENSECAG00000011752, ENSECAG00000033344, ENSECAG00000005838, ENSECAG00000011539	PIK3R1, AGPAT1, PIK3CA, IP6K2, LPIN2, SOCS7, ATG14, PIK3R3, MOGAT1, CHKA
GO:0034655_nucleobase-containing_compound_catabolic_process	-0.618	-1.23	0.64	0.728	ENSECAG00000005798, ENSECAG00000001582, ENSECAG00000018988, ENSECAG00000017022, ENSECAG00000010812, ENSECAG00000007560, ENSECAG00000019475, ENSECAG00000025040, ENSECAG00000007955, ENSECAG00000023108, ENSECAG00000013162, ENSECAG00000024732, ENSECAG00000015551, ENSECAG00000010723, ENSECAG00000013090, ENSECAG00000023181, ENSECAG00000012606, ENSECAG00000008959, ENSECAG00000017141, ENSECAG00000012464,…	CNOT7, CNOT6L, XRN2, UPF2, EDC4, FXR1, YTHDF1, ZCCHC17, HNRNPU, YTHDF2, PCNA, EXOSC9, SAMD4B, ANGEL2, POLA1, CNOT3, EXOSC8, SAMHD1, UPF3A, SYNCRIP, DCPS, TNRC6B, NUDT4, FMR1, FASTKD2, SMG7, UPF3B
GO:0008033_tRNA_processing	-0.739	-0.668	0.76	0.736	ENSECAG00000025168, ENSECAG00000024919, ENSECAG00000020504, ENSECAG00000012600, ENSECAG00000007177, ENSECAG00000002091, ENSECAG00000002016, ENSECAG00000033970	ELAC2, CDKAL1, THADA, RTRAF, TRUB1, QTRT2, THUMPD3, TRMT112
GO:0051052_regulation_of_DNA_metabolic_process	-0.383	-0.573	0.752	0.736	ENSECAG00000012810, ENSECAG00000011567, ENSECAG00000010827, ENSECAG00000028670, ENSECAG00000007955, ENSECAG00000022081, ENSECAG00000032705, ENSECAG00000012231, ENSECAG00000019809, ENSECAG00000037284, ENSECAG00000021453, ENSECAG00000019133, ENSECAG00000008647, ENSECAG00000029603, ENSECAG00000008636, ENSECAG00000033949, ENSECAG00000012777	TNKS2, UIMC1, TEX15, DPPA3, HNRNPU, PARG, H1-3, DEK, CGAS, WDR70, TICRR, TIGAR, POT1, H1-4, EYA1, OTUB1, MPHOSPH8
GO:0051656_establishment_of_organelle_localization	-0.56	-0.828	0.752	0.736	ENSECAG00000019646, ENSECAG00000024920, ENSECAG00000015360, ENSECAG00000010951, ENSECAG00000015237, ENSECAG00000023433, ENSECAG00000014600, ENSECAG00000009163, ENSECAG00000008104, ENSECAG00000016495, ENSECAG00000012044, ENSECAG00000009730, ENSECAG00000007955, ENSECAG00000011655, ENSECAG00000017824, ENSECAG00000022693, ENSECAG00000007602, ENSECAG00000014459, ENSECAG00000014240, ENSECAG00000014542,…	AHI1, XPO1, IFT122, DNAAF4, PIBF1, TMEM231, TRAK1, NUF2, DYNLL1, NUSAP1, PTPDC1, SAR1A, HNRNPU, PCM1, TERB1, SEPTIN7, LTV1, ARL13B, IFT46, SPICE1, CEP120, RAB11A, INSC, EIF6, ODF2L, IFT57, DRC1, NUP88, SPAG1, PICALM, SCLT1, RAN, NPM1, TRAF3IP1, CEP89, RRS1, KIF5B, RHOT1, CEP20, MYO5A, IQCB1, CCNB1, OFD1, SEPTIN2, PARD3, DTNBP1, BBS5, CENPJ, ODF2, IFT74, BBS7, HYLS1, CEP41, CCDC66, MYO6, CFAP20, I…
GO:0031331_positive_regulation_of_cellular_catabolic_process	-0.982	-1.34	0.72	0.736	ENSECAG00000005798, ENSECAG00000001582, ENSECAG00000019475, ENSECAG00000019466, ENSECAG00000023108, ENSECAG00000024732, ENSECAG00000015551, ENSECAG00000023181, ENSECAG00000017195, ENSECAG00000012606, ENSECAG00000010405, ENSECAG00000012956, ENSECAG00000021240, ENSECAG00000009759, ENSECAG00000036783, ENSECAG00000019705	CNOT7, CNOT6L, YTHDF1, ARIH1, YTHDF2, EXOSC9, SAMD4B, CNOT3, NPRL3, EXOSC8, TRIB2, DCPS, SH3RF1, TNRC6B, SVIP, CDC20
GO:0048731_system_development	-0.568	-0.982	0.712	0.736	ENSECAG00000017807, ENSECAG00000014820, ENSECAG00000019993, ENSECAG00000022110, ENSECAG00000038178, ENSECAG00000016797, ENSECAG00000007560, ENSECAG00000001445, ENSECAG00000014600, ENSECAG00000023274, ENSECAG00000007640, ENSECAG00000006665, ENSECAG00000009003, ENSECAG00000009111, ENSECAG00000011669, ENSECAG00000007687, ENSECAG00000017632, ENSECAG00000006613, ENSECAG00000005815, ENSECAG00000021916,…	NAV2, DSP, KALRN, ASXL1, HEY2, IGF2BP3, FXR1, CHD7, TRAK1, LAMA5, KDM6A, GPM6B, APC, RUFY3, TNN, PTPN14, GCM2, FBXO45, LLPH, CEP120, HEY1, MTF1, CLSTN1, TACC1, NGF, PAK2, PBX2, MANF, PAK1, SOX6, RBFOX2, LRRC4C, ISL2, MAP4K4, RTN3, NOTCH1, KIF5B, MAP1S, FRYL, ZFHX3, ACTB, PKNOX1, NEDD4L, KDM6B, LSR, FGF16, JAK1, LDB1, LGALS12, CHD8, FHOD3, PDCL3, ECT2, DTNBP1, SMO, ACVR1B, HOXA9, TIAM1, ACTB, VAPA…
[truncated: 243 more rows]

## Sheet: VIM_VS_FR_cc
GENE.SET	MEAN.ABS.T0	PADOG0	P.MEAN.ABS.T	PVAL	genes_in_geneset	genenames_in_geneset
[truncated: 285 more rows]

[truncated: 10 more sheets: VIM_VS_FR_mf, VIM_VS_FR_kegg, VMAT_VS_FR_bp, VMAT_VS_FR_cc, VMAT_VS_FR_mf, VMAT_VS_FR_kegg, VIM_VS_VMAT_bp, VIM_VS_VMAT_cc, VIM_VS_VMAT_mf, VIM_VS_VMAT_kegg]
